# Supplementary material for: Genes Required for Survival in Microgravity Revealed by Genome-Wide Yeast Deletion Collections Cultured during Spaceflight
Source: Biomed Res Int. 2015 Jan 13;2015:976458. doi: 10.1155/2015/976458 (PMC4309212; doi:10.1155/2015/976458)
Supplement: Supplementary file 1 — Supplementary tables 1 and 2 provide the Illumina sequencing counts for each barcode/strain of each sample following mean normalization for the homozygous strains (Supplementary Table S1) and the heterozygous deletion strains (Supplementary Table S2). Supplementary tables 3 and 4 list those strains in the homozygous deletion collection (Supplementary Table S3) and the heterozygous deletion collection (Supplementary Table S4) that were excluded from the analysis for technical reasons. Supplementary tables 5 and 6 contain the results from the analysis of the homozygous deletion collection, comparing ground experiments to flight experiments in YPD media (Supplementary Table S5) and in YPD media + 0.5M NaCl (Supplementary Table S6). Supplementary table S7 contains the concordance in GO enrichments of the experiments presented in this study to a compendium of published data (reference 13). Supplementary tables 8 and 9 contain the results from the analysis of the heterozygous deletion collection, comparing ground experiments to flight experiments in YPD media (Supplementary Table S8) and in YPD media + 0.5M NaCl (Supplementary Table S9). [file 976458.f1.zip]

Archive with 10 entries (10 files):
- Supplementary_Tables.docx
- TableS1_counts-hom.xlsx
- TableS2_counts-het.xlsx
- TableS3_excludedStrains-hom.xlsx
- TableS4_excludedStrains-het.xlsx
- TableS5_vsT1-hom1-dropsToBg.xlsx
- TableS6_vsT1-hom1-NaCl-dropsToBg.xlsx
- TableS7_GOBPv4EnrichmentBasedSim-HIPHOPcompendiumV3.xlsx
- TableS8_vsT1-het1-dropsToBg.xlsx
- TableS9_vsT1-het1-NaCl-dropsToBg.xlsx
