# Supplementary material for: Genes Required for Survival in Microgravity Revealed by Genome-Wide Yeast Deletion Collections Cultured during Spaceflight
Source: Biomed Res Int. 2015 Jan 13;2015:976458. doi: 10.1155/2015/976458 (PMC4309212; doi:10.1155/2015/976458)
Supplement: Supplementary file 1 — Supplementary tables 1 and 2 provide the Illumina sequencing counts for each barcode/strain of each sample following mean normalization for the homozygous strains (Supplementary Table S1) and the heterozygous deletion strains (Supplementary Table S2). Supplementary tables 3 and 4 list those strains in the homozygous deletion collection (Supplementary Table S3) and the heterozygous deletion collection (Supplementary Table S4) that were excluded from the analysis for technical reasons. Supplementary tables 5 and 6 contain the results from the analysis of the homozygous deletion collection, comparing ground experiments to flight experiments in YPD media (Supplementary Table S5) and in YPD media + 0.5M NaCl (Supplementary Table S6). Supplementary table S7 contains the concordance in GO enrichments of the experiments presented in this study to a compendium of published data (reference 13). Supplementary tables 8 and 9 contain the results from the analysis of the heterozygous deletion collection, comparing ground experiments to flight experiments in YPD media (Supplementary Table S8) and in YPD media + 0.5M NaCl (Supplementary Table S9). [file 976458.f1.zip › TableS1_counts-hom.xlsx]

## Sheet: README
Table S1. Normalized counts of homozygous deletion strain tags (see Methods).
all sheets
Column	Description
Strain tag	the uptag or downtag of a deletion strain
7 generations	count of the strain tag at 7 generations
14 generations	count of the strain tag at 14 generations
21 generations	count of the strain tag at 21 generations

## Sheet: ground
Strain tag	7 generations	14 generations	21 generations
YAL002W::chr1_1:up	1320.11	788.903	146.35
YAL004W::chr1_1:up	388.315	249.813	339.741
YAL005C::chr1_1:up	695.896	871.181	1179.95
YAL007C::chr1_1:up	3377.87	3577.06	2812.01
YAL008W::chr1_1:up	1858.09	1708.48	1260.96
YAL009W::chr1_1:up	402.099	444.154	1275.33
YAL010C::chr1_1:up	143.748	32.3901	0.435565
YAL011W::chr1_1:up	2017.59	2074.08	337.563
YAL012W::chr00_12:up	150.837	93.0749	85.8063
YAL013W::chr1_1:up	301.279	287.415	894.651
YAL014C::chr1_1:up	2689.85	2904.68	2084.61
YAL015C::chr1_1:up	2894.25	3045.41	1404.7
YAL016W::chr00_12:up	135.083	120.997	33.5385
YAL017W::chr1_1:up	1518.21	1832.09	2174.34
YAL018C::chr1_1:up	1391.4	1781.45	2009.7
YAL019W::chr1_1:up	824.678	746.089	497.415
YAL020C::chr1_1:up	2496.48	2244.6	1895.58
YAL021C::chr1_1:up	185.887	135.889	91.0331
YAL022C::chr1_1:up	1849.42	1921.81	1482.66
YAL023C::chr1_1:up	2889.52	2854.42	7681.62
YAL024C::chr00_17a:up	5.51361	4.4676	29.6184
YAL026C::chr1_1:up	773.086	606.104	1295.81
YAL027W::chr1_1:up	1660.78	2010.42	1669.96
YAL028W::chr1_1:up	1411.48	1741.25	1912.57
YAL029C::chr1_1:up	834.13	971.33	1064.09
YAL030W::chr1_1:up	1102.72	982.127	1124.63
YAL031C::chr1_1:up	996.387	829.111	893.344
YAL034C::chr1_1:up	1138.17	792.626	613.276
YAL035W::chr1_1:up	47.2595	8.19059	0
YAL036C::chr1_1:up	2134.55	2410.64	1933.47
YAL037W::chr1_1:up	678.174	420.699	361.955
YAL040C::chr1_1:up	206.76	89.7242	26.5695
YAL042W::chr1_1:up	1230.32	1440.06	877.664
YAL043C-A::chr1_1:up	362.717	231.198	338.87
YAL044C::chr1_1:up	334.755	452.344	1074.54
YAL045C::chr1_1:up	971.97	860.012	523.549
YAL046C::chr1_1:up	1018.84	1062.17	1000.06
YAL047C::chr00_12:up	10.6334	12.6582	8.27574
YAL048C::chr1_1:up	792.778	605.732	638.103
YAL049C::chr1_1:up	1199.6	1192.48	1001.36
YAL051W::chr1_1:up	2086.11	2352.56	1817.61
YAL053W::chr1_1:up	810.5	569.619	1062.34
YAL054C::chr00_12:up	176.829	279.225	242.174
YAL055W::chr1_1:up	748.669	603.87	550.99
YAL056W::chr1_1:up	1663.14	715.56	803.182
YAL058C-A::chr00_12:up	1526.09	1909.15	5674.98
YAL058W::chr1_1:up	3726.41	4134.76	7905.51
YAL059W::chr1_1:up	564.751	370.811	259.597
YAL060W::chr1_1:up	1606.03	1840.65	1290.58
YAL061W::chr1_1:up	1120.05	1282.94	959.114
YAL062W::chr1_1:up	1286.25	1281.08	1240.05
YAL064C-A::chr00_1:up	845.551	1032.01	820.169
YAL065C::chr1_1:up	454.085	365.971	347.145
YAL066W::chr1_1:up	1126.74	1217.79	730.878
YAL067C::chr1_1:up	342.237	253.164	174.226
YAL068C::chr1_1:up	1383.13	1603.87	1386.84
YAR002C-A::chr00_16a:up	879.814	1056.96	487.833
YAR002W::chr1_1:up	730.947	385.703	319.269
YAR003W::chr1_1:up	1368.16	1127.32	824.525
YAR014C::chr1_1:up	1529.24	1865.22	2450.92
YAR015W::chr1_1:up	127.601	102.382	188.164
YAR018C::chr1_1:up	563.569	392.032	580.608
YAR020C::chr1_1:up	816.408	483.617	471.717
YAR023C::chr1_1:up	1243.71	1428.14	1284.48
YAR027W::chr1_1:up	1185.82	1006.7	905.975
YAR028W::chr1_1:up	2126.28	1706.99	1231.34
YAR029W::chr1_1:up	2600.45	3283.68	2690.05
YAR030C::chr1_1:up	2350.37	2561.42	1647.74
YAR031W::chr1_1:up	956.217	586.744	552.296
YAR035W::chr1_1:up	1723.4	1307.52	1095.45
YAR037W::chr1_1:up	2352.73	2288.53	1348.94
YAR040C::chr1_1:up	2383.85	2779.96	2244.47
YAR042W::chr1_1:up	939.282	499.254	605.871
YAR043C::chr1_1:up	391.072	251.302	143.736
YAR044W::chr1_1:up	26.3865	21.5934	20.4716
YAR047C::chr1_1:up	2924.18	2800.44	2244.03
YAR050W::chr00_12:up	98.4573	65.5248	73.6105
YBL001C::chr2_1:up	379.651	430.378	318.834
YBL002W::chr2_1:up	395.798	327.624	145.914
YBL003C::chr2_1:up	88.6115	45.0483	38.7653
YBL005W::chr2_1:up	429.667	287.043	361.955
YBL006C::chr2_1:up	249.294	210.349	40.5075
YBL007C::chr2_1:up	213.062	88.235	0
YBL008W::chr2_1:up	93.3375	154.877	3.92009
YBL009W::chr2_1:up	211.88	230.826	154.626
YBL010C::chr2_1:up	1066.88	833.579	387.217
YBL011W::chr2_1:up	312.306	293	236.076
YBL012C::chr2_1:up	204.397	134.4	134.154
YBL013W::chr2_1:up	413.127	428.889	368.924
YBL015W::chr2_1:up	539.152	347.728	116.296
YBL017C::chr2_1:up	215.031	256.515	127.185
YBL019W::chr2_1:up	200.065	124.72	189.035
YBL021C::chr2_1:up	54.7422	77.8106	106.713
YBL022C::chr2_1:up	107.909	127.699	41.3787
YBL024W::chr2_1:up	291.827	234.921	29.1829
YBL027W::chr2_1:up	114.604	76.3214	161.595
YBL028C::chr2_1:up	576.172	625.464	116.296
YBL029W::chr2_1:up	53.5607	77.8106	96.6954
YBL031W::chr2_1:up	932.587	813.475	820.605
YBL032W::chr2_1:up	59.4682	58.4511	65.3348
YBL036C::chr2_1:up	347.751	348.1	178.146
YBL037W::chr2_1:up	843.188	829.856	1239.62
YBL039C::chr2_1:up	535.214	405.807	84.4996
YBL043W::chr2_1:up	459.598	372.672	404.204
YBL044W::chr2_1:up	899.899	761.353	676.432
YBL046W::chr2_1:up	81.9164	94.5641	83.6285
YBL047C::chr2_1:up	489.529	290.766	72.7394
YBL048W::chr2_1:up	276.468	199.18	130.67
YBL049W::chr2_1:up	708.105	493.669	672.077
YBL051C::chr2_1:up	160.288	106.85	23.5205
YBL052C::chr2_1:up	141.778	94.9364	60.5435
YBL053W::chr2_1:up	292.615	218.54	209.071
YBL054W::chr2_1:up	327.666	364.481	316.656
YBL055C::chr2_1:up	191.401	145.569	120.652
YBL056W::chr2_1:up	179.586	147.803	158.981
YBL057C::chr2_1:up	1828.55	1916.23	1989.23
YBL059W::chr2_1:up	277.256	191.362	122.829
YBL060W::chr2_1:up	191.401	120.625	133.283
YBL061C::chr2_1:up	344.994	355.919	266.13
YBL062W::chr2_1:up	657.694	644.451	247.836
YBL063W::chr2_1:up	528.125	573.342	314.914
YBL064C::chr2_1:up	97.6696	104.244	63.5925
YBL065W::chr2_1:up	271.348	176.47	100.616
YBL066C::chr2_1:up	209.911	365.226	101.922
YBL067C::chr2_1:up	177.223	215.934	189.035
YBL068W::chr2_1:up	308.368	221.518	186.422
YBL069W::chr2_1:up	272.924	177.959	146.785
YBL070C::chr2_1:up	337.511	248.324	250.014
YBL071C::chr2_1:up	402.099	340.282	328.416
YBL072C::chr2_1:up	1158.65	774.383	2556.33
YBL075C::chr2_1:up	281.194	249.069	496.98
YBL078C::chr2_1:up	322.152	420.326	564.057
YBL079W::chr2_1:up	381.227	229.709	1081.51
YBL080C::chr2_1:up	6.69509	5.5845	28.3117
YBL081W::chr2_1:up	144.929	102.01	62.7214
YBL082C::chr2_1:up	391.072	245.718	865.903
YBL083C::chr2_1:up	181.161	181.682	327.98
YBL085W::chr2_1:up	270.561	199.553	102.793
YBL086C::chr2_1:up	320.183	435.218	500.9
YBL087C::chr2_1:up	1327.99	1443.78	4436.67
YBL088C::chr2_1:up	138.234	162.323	67.077
YBL089W::chr2_1:up	1164.16	1148.92	2974.04
YBL091C-A::chr00_1:up	439.907	335.814	314.042
YBL091C::chr2_1:up	620.281	472.448	898.135
YBL094C::chr2_1:up	3096.28	2549.14	2929.61
YBL095W::chr2_2:up	958.186	767.682	598.902
YBL096C::chr2_2:up	1462.29	1133.65	1190.83
YBL098W::chr2_2:up	2205.84	1845.12	1159.91
YBL099W::chr2_2:up	498.588	235.666	749.172
YBL100C::chr2_2:up	515.128	284.437	762.674
YBL102W::chr2_2:up	1337.84	842.514	566.67
YBL103C::chr2_2:up	1181.09	1188.75	975.23
YBL104C::chr2_2:up	743.943	740.876	353.679
YBL106C::chr2_2:up	1092.09	615.784	710.842
YBL107C::chr2_2:up	1033.01	702.157	721.296
YBR001C::chr2_2:up	1655.66	1293	1118.53
YBR003W::chr2_2:up	696.29	776.617	1490.07
YBR005W::chr2_2:up	1264.98	954.204	817.12
YBR006W::chr2_2:up	3413.71	3838.78	2071.55
YBR007C::chr2_2:up	1600.52	1444.52	1311.92
YBR008C::chr2_2:up	1068.06	683.542	432.081
YBR009C::chr2_2:up	1385.1	844.003	360.648
YBR010W::chr2_2:up	1736.39	1251.67	545.327
YBR012C::chr2_2:up	2040.43	1727.84	1659.94
YBR013C::chr2_2:up	1683.23	1163.44	1142.05
YBR014C::chr2_2:up	2453.95	2068.87	1884.25
YBR015C::chr2_2:up	306.793	4.8399	173.355
YBR016W::chr2_2:up	2468.52	2444.52	2818.54
YBR018C::chr2_2:up	981.028	785.925	756.576
YBR019C::chr2_2:up	595.469	363.365	328.852
YBR020W::chr00_18:up	174.072	136.634	111.069
YBR020W::chr2_2:up	370.593	262.471	225.623
YBR021W::chr2_2:up	994.812	654.503	349.759
YBR022W::chr2_2:up	1164.16	938.195	386.782
YBR023C::chr2_2:up	533.245	571.852	340.612
YBR024W::chr2_2:up	795.141	534.622	445.583
YBR025C::chr2_2:up	722.676	471.331	253.063
YBR026C::chr2_2:up	300.098	322.039	964.777
YBR027C::chr2_2:up	885.721	643.334	643.33
YBR028C::chr2_2:up	614.373	510.795	311.429
YBR030W::chr2_2:up	799.473	560.683	471.717
YBR031W::chr2_2:up	669.116	441.547	223.009
YBR032W::chr2_2:up	752.607	593.446	538.358
YBR033W::chr2_2:up	889.66	1036.48	637.232
YBR034C::chr2_2:up	291.433	270.662	172.484
YBR035C::chr2_2:up	195.733	104.989	255.677
YBR036C::chr2_2:up	254.807	241.995	445.147
YBR037C::chr2_2:up	574.99	380.118	1170.8
YBR039W::chr2_2:up	897.93	623.602	4376.56
YBR040W::chr2_2:up	349.326	291.511	270.921
YBR041W::chr2_2:up	370.593	179.448	332.772
YBR042C::chr2_2:up	210.305	234.549	270.921
YBR043C::chr2_2:up	679.749	468.725	185.115
YBR044C::chr2_2:up	4.72595	2.2338	2.61339
YBR045C::chr2_2:up	693.139	526.06	183.373
YBR046C::chr2_2:up	1015.29	1023.08	773.999
YBR047W::chr2_2:up	493.862	434.846	231.721
YBR048W::chr2_2:up	951.491	513.029	491.317
YBR050C::chr2_2:up	788.052	441.175	414.222
YBR051W::chr2_2:up	506.464	394.265	421.627
YBR052C::chr2_2:up	413.914	303.052	254.806
YBR053C::chr2_2:up	322.152	171.63	152.448
YBR054W::chr2_2:up	799.079	737.898	597.16
YBR056W::chr2_2:up	62.225	73.7153	69.2548
YBR057C::chr2_2:up	325.303	277.736	253.934
YBR058C::chr2_2:up	674.235	470.587	294.442
YBR059C::chr2_2:up	874.3	642.217	750.043
YBR061C::chr2_2:up	158.319	119.508	285.731
YBR062C::chr2_2:up	666.359	537.973	636.796
YBR063C::chr2_2:up	382.014	311.987	317.091
YBR064W::chr2_2:up	871.544	956.438	731.749
YBR065C::chr2_2:up	960.155	882.723	835.849
YBR066C::chr2_2:up	837.674	830.228	411.609
YBR067C::chr2_2:up	330.423	243.112	225.187
YBR068C::chr2_2:up	537.183	403.573	815.813
YBR069C::chr2_2:up	488.742	410.647	206.022
YBR071W::chr2_2:up	668.722	413.625	498.286
YBR072W::chr2_2:up	809.712	788.159	792.293
YBR073W::chr2_2:up	521.036	443.781	247.836
YBR074W::chr2_2:up	793.565	607.593	521.807
YBR075W::chr2_2:up	393.829	247.207	267.437
YBR076W::chr2_2:up	695.108	531.272	462.57
YBR077C::chr2_2:up	244.568	96.4256	89.7264
YBR078W::chr2_2:up	1111.39	838.047	4068.18
YBR081C::chr2_3:up	0	4.8399	0
YBR082C::chr2_3:up	279.225	185.405	0.435565
YBR083W::chr00_16a:up	161.864	116.53	144.172
YBR084C-A::chr00_16a:up	790.415	785.552	1827.2
YBR084W::chr2_3:up	671.478	791.137	1027.06
YBR085W::chr2_3:up	380.833	657.109	526.598
YBR090C-A::chr2_3:up	306.399	381.607	235.641
YBR090C::chr00_16a:up	193.37	106.85	206.458
YBR092C::chr2_3:up	457.629	549.514	591.497
YBR093C::chr2_3:up	585.624	458.673	390.702
YBR094W::chr2_3:up	163.833	557.333	362.826
YBR095C::chr2_3:up	248.9	278.108	402.027
YBR097W::chr2_3:up	9.05807	0	0
YBR098W::chr2_3:up	179.98	155.994	70.5615
YBR099C::chr2_3:up	1006.23	746.461	539.23
YBR100W::chr2_3/chr00_16a:up	588.774	572.225	374.15
YBR101C::chr2_3:up	293.403	315.338	220.396
YBR103W::chr2_3:up	259.927	187.639	41.3787
YBR104W::chr2_3:up	368.624	365.226	171.613
YBR105C::chr2_3:up	291.04	268.428	428.596
YBR106W::chr2_3:up	1264.19	817.57	44.8632
YBR107C::chr2_3:up	188.644	129.933	124.572
YBR113W::chr2_3:up	12.9964	16.0089	13.5025
YBR115C::chr2_3:up	174.466	182.427	213.427
YBR116C::chr2_3:up	167.771	120.625	93.2109
YBR119W::chr2_3:up	158.713	198.436	1.3067
YBR120C::chr2_3:up	196.521	202.903	343.661
YBR125C::chr00_16a:up	752.213	1017.87	354.985
YBR126C::chr2_3:up	10.6334	6.3291	0
YBR128C::chr2_3:up	178.405	93.8195	94.082
YBR129C::chr2_3:up	139.809	86.0012	113.682
YBR130C::chr2_3:up	217	166.79	142.865
YBR131W::chr00_16a:up	159.895	84.8843	57.059
YBR133C::chr2_3:up	11.8149	5.9568	0
YBR134W::chr2_3:up	2404.72	2189.49	2277.13
YBR137W::chr2_3:up	192.976	139.985	134.154
YBR138C::chr2_3:up	392.254	413.625	565.799
YBR139W::chr2_3:up	556.48	527.921	348.452
YBR141C::chr2_3:up	862.486	820.921	518.758
YBR144C::chr2_3:up	814.438	794.86	561.008
YBR145W::chr2_3:up	278.437	270.662	324.06
YBR146W::chr2_3:up	7.87658	0.3723	3.04896
YBR147W::chr2_3:up	746.7	630.303	617.196
YBR148W::chr2_3:up	756.546	787.042	559.701
YBR150C::chr00_16a:up	243.386	80.4167	66.2059
YBR151W::chr2_3:up	590.35	746.089	495.673
YBR156C::chr2_3:up	0.393829	0	13.5025
YBR157C::chr2_3:up	401.706	291.138	213.427
YBR158W::chr2_3:up	411.945	449.366	609.355
YBR159W::chr2_3:up	4.33212	3.723	5.22678
YBR161W::chr2_3:up	220.15	268.8	218.218
YBR162W-A::chr2_3:up	383.589	361.875	363.261
YBR163W::chr2_3:up	481.259	389.053	605.871
YBR164C::chr2_3:up	257.958	183.916	132.847
YBR165W::chr2_3:up	96.4881	126.21	52.2678
YBR169C::chr00_16a:up	563.176	427.028	170.741
YBR170C::chr2_3:up	392.254	419.209	903.797
YBR171W::chr2_3:up	81.1288	41.3253	190.342
YBR172C::chr2_3:up	1537.11	1270.66	1411.23
YBR173C::chr2_4:up	428.88	260.61	313.607
YBR174C::chr2_4:up	943.614	883.84	1083.69
YBR175W::chr2_4:up	867.605	722.261	798.826
YBR176W::chr2_4:up	461.568	323.901	447.325
YBR177C::chr2_4:up	544.666	426.655	149.834
YBR178W::chr2_4:up	401.312	385.33	216.476
YBR180W::chr2_4:up	881.389	655.992	1246.15
YBR181C::chr2_4:up	1112.96	538.718	339.305
YBR182C::chr2_4:up	311.913	329.113	301.847
YBR183W::chr2_4:up	248.9	200.67	66.2059
YBR184W::chr2_4:up	2348.01	2288.9	2103.34
YBR185C::chr2_4:up	250.081	180.565	217.783
YBR186W::chr2_4:up	191.007	169.396	54.4456
YBR188C::chr2_4:up	324.121	354.802	177.275
YBR189W::chr00_14:up	269.379	183.916	111.505
YBR191W::chr00_11:up	28.7495	10.0521	0.435565
YBR194W::chr2_4:up	417.065	157.855	589.755
YBR195C::chr2_4:up	270.561	160.089	94.5176
YBR197C::chr2_4:up	214.637	227.103	109.327
YBR199W::chr2_4:up	699.834	933.355	585.399
YBR200W::chr2_4:up	50.8039	18.2427	57.9301
YBR203W::chr2_4:up	601.771	532.761	614.582
YBR204C::chr2_4:up	539.152	508.561	365.875
YBR205W::chr2_4:up	983.391	1153.76	646.814
YBR206W::chr2_4:up	652.575	565.151	446.89
YBR207W::chr2_4:up	528.125	537.601	607.178
YBR208C::chr2_4:up	304.036	239.761	155.932
YBR210W::chr2_4:up	540.333	352.196	215.605
YBR212W::chr2_4:up	1564.68	1609.45	1242.67
YBR214W::chr2_4:up	1281.91	1225.61	577.124
YBR215W::chr2_4:up	0.787658	4.0953	0
YBR216C::chr2_4:up	3042.72	2854.05	2697.02
YBR217W::chr2_4:up	639.185	468.725	662.494
YBR218C::chr2_4:up	883.359	590.84	983.07
YBR219C::chr2_4:up	605.315	484.362	352.372
YBR220C::chr2_4:up	1264.98	919.953	562.75
YBR221C::chr2_4:up	581.292	464.258	2070.24
YBR222C::chr2_4:up	791.596	805.657	1088.48
YBR223C::chr2_4:up	730.159	740.132	742.638
YBR224W::chr2_4:up	1044.83	1071.48	570.155
YBR225W::chr2_4:up	868.393	634.399	327.98
YBR226C::chr2_4:up	463.537	440.803	202.973
YBR227C::chr2_4:up	395.011	419.582	561.443
YBR228W::chr2_4:up	216.212	138.495	84.9352
YBR229C::chr2_4:up	407.613	303.424	452.552
YBR230C::chr2_4:up	457.629	458.301	376.328
YBR231C::chr2_4:up	233.147	166.79	74.0461
YBR232C::chr00_8:up	433.212	571.108	515.709
YBR233W::chr2_4:up	189.826	135.145	95.3887
YBR235W::chr2_4:up	134.69	109.828	48.7833
YBR238C::chr2_4:up	129.964	100.893	177.275
YBR239C::chr2_4:up	346.963	328.368	384.168
YBR240C::chr2_4:up	348.933	359.269	222.574
YBR241C::chr2_4:up	658.088	793.743	479.993
YBR242W::chr2_4:up	361.929	362.62	367.181
YBR244W::chr2_4:up	302.855	294.861	236.076
YBR245C::chr2_4:up	235.51	190.617	162.901
YBR246W::chr2_4:up	240.63	185.405	156.803
YBR248C::chr2_4:up	367.836	349.217	354.114
YBR249C::chr2_4:up	83.0979	136.634	94.5176
YBR250W::chr2_4:up	323.334	281.831	322.318
YBR251W::chr2_4:up	398.949	260.982	758.319
YBR255W::chr2_4:up	60.2558	59.568	21.3427
YBR258C::chr2_4:up	327.666	212.955	228.672
YBR259W::chr2_4:up	394.223	495.159	329.287
YBR260C::chr2_4:up	514.735	325.762	115.425
YBR261C::chr2_4:up	200.065	157.855	24.3916
YBR262C::chr2_4:up	261.502	317.944	353.679
YBR263W::chr2_4:up	198.096	285.926	105.407
YBR264C::chr2_4:up	243.386	268.8	190.777
YBR266C::chr2_4:up	138.628	101.638	20.9071
YBR267W::chr2_4:up	215.424	157.11	28.3117
YBR268W::chr2_4:up	751.032	597.169	1328.47
YBR269C::chr00_1:up	307.974	426.655	241.739
YBR270C::chr00_16a:up	1239.38	1400.22	1103.72
YBR271W::chr00_1:up	347.751	342.888	429.032
YBR272C::chr00_16a:up	640.366	867.831	720.425
YBR273C::chr00_1:up	107.515	75.9491	123.7
YBR275C::chr00_16a:up	218.181	163.067	75.7883
YBR276C::chr00_16a:up	135.477	147.803	95.8243
YBR277C::chr00_1:up	2930.48	2897.24	1226.12
YBR278W::chr00_1:up	1439.05	908.411	691.242
YBR279W::chr00_1:up	5.90744	0	0
YBR280C::chr00_16a:up	701.41	695.084	683.402
YBR281C::chr00_1:up	385.559	527.921	335.385
YBR282W::chr00_1:up	50.8039	21.9657	47.041
YBR283C::chr00_1:up	192.976	134.772	73.1749
YBR284W::chr00_1:up	787.658	739.387	357.163
YBR285W::chr00_1:up	746.306	704.391	693.42
YBR286W::chr00_1:up	289.464	189.501	75.7883
YBR287W::chr00_16a:up	318.214	341.399	204.716
YBR288C::chr00_16a:up	201.247	238.644	148.528
YBR289W::chr00_16a:up	91.3683	43.5591	0
YBR290W::chr00_1:up	502.132	562.545	703.438
YBR291C::chr00_1:up	236.297	254.281	31.7962
YBR292C::chr00_1:up	529.7	612.061	344.096
YBR293W::chr00_1:up	55.5299	91.2134	54.4456
YBR294W::chr00_16a:up	479.29	614.667	316.656
YBR295W::chr00_1:up	265.047	433.729	334.078
YBR296C::chr00_1:up	434.393	512.284	488.268
YBR297W::chr00_1:up	301.279	358.152	344.096
YBR298C::chr00_1:up	273.317	333.208	100.18
YBR299W::chr00_17a:up	146.898	99.7763	151.577
YBR300C::chr00_1:up	394.223	405.062	287.473
YBR301W::chr00_16a:up	659.664	835.813	609.355
YCL001W-A::chr00_1:up	199.277	231.943	31.7962
YCL001W::chr3_1:up	716.769	870.809	1002.24
YCL002C::chr3_1:up	302.461	374.161	316.656
YCL005W::chr3_1:up	161.47	252.047	128.056
YCL006C::chr3_1/chr00_12:up	2279.09	2991.43	2599.02
YCL008C::chr3_1:up	628.551	853.683	1.74226
YCL009C::chr3_1:up	530.094	691.733	322.318
YCL010C::chr3_1:up	2602.03	2759.49	1047.97
YCL011C::chr3_1:up	429.667	483.99	441.663
YCL012W::chr3_1:up	980.24	787.414	503.513
YCL013W::chr3_1:up	724.645	950.481	512.224
YCL014W::chr3_1:up	382.408	552.865	199.053
YCL016C::chr3_1:up	63.4065	83.7674	0
YCL022C::chr00_12:up	216.606	328.368	473.895
YCL023C::chr3_1/chr00_12:up	2534.29	2320.92	1117.22
YCL024W::chr3_1:up	297.341	215.189	130.234
YCL025C::chr3_1:up	198.49	254.653	219.525
YCL026C-A::chr00_16a:up	555.693	712.209	578.43
YCL026C::chr3_1:up	335.149	330.23	259.161
YCL027W::chr3_1:up	223.695	382.352	147.657
YCL028W::chr3_1:up	209.911	3.723	57.059
YCL029C::chr3_1:up	72.8584	109.084	203.409
YCL030C::chr3_1:up	0	2.2338	23.5205
YCL033C::chr3_1:up	408.007	525.315	228.672
YCL035C::chr00_11:up	381.227	350.706	401.155
YCL036W::chr3_1:up	613.586	874.904	568.412
YCL037C::chr3_1:up	1713.16	1612.06	1624.66
YCL038C::chr00_12:up	183.13	209.977	125.007
YCL039W::chr3_1:up	263.078	358.897	451.245
YCL042W::chr3_1:up	5.90744	2.2338	0.87113
YCL044C::chr3_1:up	294.978	423.305	387.217
YCL045C::chr3_1:up	480.865	370.438	372.408
YCL046W::chr3_1:up	246.537	233.432	145.479
YCL047C::chr3_1:up	575.384	662.694	542.278
YCL048W::chr3_1:up	304.43	252.792	370.23
YCL049C::chr3_1:up	647.455	612.061	635.489
YCL050C::chr3_1:up	1198.42	1125.09	1181.69
YCL051W::chr3_1:up	818.771	861.502	690.371
YCL055W::chr3_1:up	174.072	287.415	180.759
YCL056C::chr3_1:up	605.315	717.049	597.595
YCL057W::chr3_1:up	217.394	239.761	304.896
YCL058C::chr00_12:up	335.149	141.474	0.87113
YCL060C::chr3_1:up	456.842	460.907	506.998
YCL061C::chr3_1:up	130.751	150.409	39.6364
YCL062W::chr3_1:up	150.443	186.522	256.112
YCL063W::chr3_1:up	246.931	223.008	128.492
YCL064C::chr3_1:up	414.702	354.802	239.125
YCL069W::chr3_1:up	623.038	573.342	129.363
YCL074W::chr00_12:up	620.281	746.833	633.747
YCL075W::chr00_12:up	654.938	740.132	1008.33
YCL076W::chr00_12:up	580.898	622.485	763.11
YCR001W::chr3_1:up	119.33	97.5425	86.2419
YCR002C::chr3_1:up	1081.85	1270.29	526.598
YCR003W::chr3_1:up	278.043	255.77	129.798
YCR004C::chr3_1:up	139.415	108.712	163.772
YCR005C::chr3_1:up	451.328	535.739	435.129
YCR006C::chr3_1:up	183.13	2.2338	314.042
YCR008W::chr3_1:up	172.103	137.006	12.1958
YCR009C::chr3_1:up	114.21	58.0788	0.435565
YCR010C::chr3_1:up	1740.72	1724.12	1937.83
YCR011C::chr3_1:up	22.4483	21.2211	4.35565
YCR014C::chr3_1:up	226.846	303.424	73.6105
YCR015C::chr3_1:up	592.319	667.906	1132.9
YCR016W::chr3_1:up	552.148	719.283	375.457
YCR017C::chr3_1:up	509.221	459.79	1129.86
YCR019W::chr3_1:up	897.143	896.125	1070.18
YCR020C-A::chr3_1:up	199.277	189.501	473.459
YCR020C::chr3_1:up	520.248	661.949	575.817
YCR020W-B::chr00_1:up	122.087	82.2782	0.87113
YCR021C::chr3_1:up	337.905	529.038	349.323
YCR022C::chr3_1:up	590.744	660.832	235.205
YCR023C::chr3_1:up	475.352	490.319	141.123
YCR024C-A::chr00_1:up	488.742	537.228	409.867
YCR024C::chr00_1:up	838.462	580.788	717.811
YCR025C::chr00_1:up	117.755	141.102	162.03
YCR027C::chr00_1:up	452.116	519.358	493.06
YCR028C-A::chr00_16a:up	443.451	319.061	369.795
YCR028C::chr00_1:up	443.845	219.285	56.1879
YCR030C::chr00_16a:up	297.341	457.184	176.404
YCR031C::chr00_1:up	831.767	527.921	652.041
YCR032W::chr00_16a:up	378.47	456.439	113.247
YCR033W::chr00_16a:up	432.424	337.304	267.872
YCR034W::chr00_1:up	316.245	142.963	61.8502
YCR036W::chr00_1:up	356.021	470.215	118.474
YCR037C::chr00_1:up	319.789	264.705	344.096
YCR043C::chr00_1:up	1906.53	1697.69	799.262
YCR044C::chr00_1:up	68.5263	32.3901	191.649
YCR045C::chr00_1:up	465.112	486.223	175.968
YCR046C::chr00_16a:up	427.304	366.715	1095.45
YCR047C::chr00_16a:up	45.6842	36.1131	0
YCR048W::chr00_16a:up	475.352	367.088	635.925
YCR049C::chr00_1:up	403.675	194.713	201.231
YCR050C::chr00_1:up	313.094	220.029	48.7833
YCR051W::chr00_1:up	605.709	384.586	138.51
YCR053W::chr00_16a:up	25.5989	7.81829	0
YCR059C::chr00_1:up	99.2449	90.4688	58.8013
YCR060W::chr00_16a:up	785.689	575.575	513.531
YCR061W::chr00_1:up	263.078	343.26	0.87113
YCR062W::chr00_16a:up	293.796	354.429	223.88
YCR063W::chr00_1:up	147.686	50.6328	0
YCR065W::chr00_1:up	1072.4	674.235	226.929
YCR066W::chr00_1:up	1286.64	1344.75	1095.88
YCR067C::chr00_16a:up	1411.48	1529.78	2717.93
YCR068W::chr00_1:up	336.33	221.891	102.358
YCR069W::chr00_16a:up	1048.37	1189.87	869.388
YCR071C::chr00_1:up	52.3793	21.9657	67.9481
YCR073C::chr00_16a:up	736.066	1124.72	967.39
YCR073W-A::chr00_1:up	4.72595	10.4244	2.17783
YCR075C::chr00_16a:up	1138.56	1092.7	1132.47
YCR076C::chr00_1:up	600.983	573.342	366.31
YCR077C::chr00_1:up	137.84	124.72	51.3967
YCR079W::chr00_1:up	428.486	439.314	341.483
YCR081W::chr00_1:up	613.192	324.273	28.7473
YCR082W::chr00_1:up	513.159	442.664	273.97
YCR083W::chr00_16a:up	323.334	396.127	189.471
YCR085W::chr00_1:up	610.041	644.079	697.34
YCR086W::chr00_1:up	575.384	589.723	189.906
YCR087C-A::chr00_1:up	215.818	118.019	23.0849
YCR087W::chr00_1:up	285.132	263.961	32.2318
YCR088W::chr00_16a:up	258.746	294.117	178.146
YCR089W::chr00_16a:up	161.076	129.56	58.3657
YCR090C::chr00_2:up	674.629	1012.28	687.322
YCR091W::chr00_2:up	636.428	588.606	620.245
YCR092C::chr00_2:up	916.046	1371.92	1048.84
YCR094W::chr00_2:up	488.742	440.058	204.716
YCR095C::chr00_14:up	558.45	419.954	103.664
YCR098C::chr00_2:up	583.261	499.254	224.752
YCR099C::chr00_2:up	468.657	559.939	439.485
YCR100C::chr00_2:up	921.954	1320.17	1010.51
YCR101C::chr00_2:up	397.767	457.184	331.465
YCR102C::chr00_2:up	359.172	307.52	174.226
YCR102W-A::chr00_14:up	365.08	387.192	552.296
YCR105W::chr00_2:up	882.571	868.575	686.45
YCR106W::chr00_2:up	1004.26	1158.6	872.872
YCR107W::chr00_17a:up	92.156	94.5641	69.2548
YDL001W::chr4_1:up	31.9002	65.5248	0
YDL002C::chr4_1:up	183.13	177.587	209.942
YDL006W::chr4_1:up	315.851	565.151	699.953
YDL009C::chr4_1:up	510.796	739.015	496.109
YDL010W::chr4_1:up	238.66	214.072	272.664
YDL011C::chr4_1:up	478.502	530.899	470.846
YDL012C::chr4_1:up	600.195	664.927	765.288
YDL013W::chr4_1:up	108.697	22.338	0
YDL018C::chr4_1:up	535.607	689.127	418.578
YDL019C::chr4_1:up	28.3557	43.9314	22.6494
YDL020C::chr4_1:up	857.76	916.23	5.66235
YDL021W::chr4_1:up	702.197	483.99	305.767
YDL022W::chr4_1:up	157.138	342.888	0.87113
YDL023C::chr4_1:up	12519	12313.1	1202.16
YDL024C::chr4_1:up	565.538	471.704	191.213
YDL025C::chr4_1:up	218.969	285.926	256.112
YDL026W::chr4_1:up	634.852	563.289	474.766
YDL027C::chr4_1:up	497.8	549.887	405.075
YDL032W::chr4_1:up	378.076	532.016	1292.32
YDL033C::chr4_1:up	618.705	672.746	586.271
YDL034W::chr4_1:up	181.555	187.639	1.3067
YDL036C::chr4_1:up	507.252	928.143	506.562
YDL037C::chr4_1:up	801.048	935.961	853.707
YDL038C::chr4_1:up	267.41	404.69	83.6285
YDL039C::chr4_1:up	1014.11	1168.28	698.211
YDL040C::chr4_1:up	641.547	659.715	1159.91
YDL041W::chr4_1:up	57.1052	40.953	0
YDL044C::chr4_1:up	863.273	790.02	2328.53
YDL046W::chr4_1:up	221.726	166.046	154.19
YDL047W::chr4_1:up	69.7077	70.3646	39.2009
YDL049C::chr4_1:up	667.934	599.775	841.947
YDL050C::chr4_1:up	352.477	476.544	436.001
YDL051W::chr4_1:up	661.633	975.425	648.556
YDL052C::chr4_1:up	885.721	1005.21	527.034
YDL053C::chr4_1:up	226.452	380.49	232.592
YDL054C::chr4_1:up	352.083	371.555	202.102
YDL056W::chr4_1:up	392.648	176.47	463.877
YDL057W::chr4_1:up	565.538	989.945	178.146
YDL059C::chr4_1:up	335.936	378.629	419.885
YDL061C::chr4_1:up	884.934	1129.93	1949.59
YDL062W::chr4_1:up	764.422	939.684	609.355
YDL063C::chr4_1:up	2585.88	2718.9	1271.85
YDL065C::chr4_1:up	131.539	119.136	267.437
YDL066W::chr4_1:up	229.208	234.549	128.927
YDL067C::chr4_1:up	104.759	76.6937	22.6494
YDL068W::chr4_1:up	710.468	736.037	1865.96
YDL069C::chr4_1:up	910.139	1074.46	2627.33
YDL070W::chr4_1:up	498.981	422.188	531.389
YDL071C::chr4_1:up	523.399	665.3	259.597
YDL072C::chr4_1:up	1781.29	2051.37	1169.06
YDL073W::chr4_1:up	106.728	123.604	382.426
YDL074C::chr4_1:up	458.811	421.816	811.022
YDL075W::chr4_1:up	76.009	16.0089	0
YDL076C::chr4_1:up	1409.12	1418.09	923.833
YDL077C::chr4_1:up	44.8965	46.5375	57.4946
YDL078C::chr4_1:up	3803.21	4911.75	3831.23
YDL079C::chr4_1:up	868.393	1215.19	986.555
YDL080C::chr4_1:up	367.442	447.132	445.147
YDL081C::chr4_1:up	1063.34	689.127	1070.18
YDL082W::chr4_1:up	1016.87	837.302	133.283
YDL083C::chr4_1:up	662.027	478.033	243.481
YDL085W::chr4_1:up	211.88	283.692	209.507
YDL086W::chr4_1:up	484.804	448.621	392.88
YDL088C::chr4_1:up	309.55	306.403	241.303
YDL089W::chr4_1:up	1135.8	841.397	547.07
YDL090C::chr4_1:up	744.731	467.236	2.61339
YDL091C::chr4_1:up	463.931	314.593	465.183
YDL093W::chr4_1:up	494.649	803.05	841.947
YDL094C::chr4_1:up	793.959	691.733	669.899
YDL095W::chr4_1:up	1086.18	1234.17	987.426
YDL096C::chr4_2:up	555.693	575.948	1485.71
YDL099W::chr4_2:up	192.189	134.4	108.456
YDL100C::chr4_2:up	107.121	131.422	60.108
YDL101C::chr4_2:up	386.74	511.912	403.333
YDL104C::chr4_2:up	228.815	277.363	628.52
YDL106C::chr4_2:up	252.838	239.389	106.713
YDL107W::chr4_2:up	0.787658	609.827	1014.43
YDL109C::chr4_2:up	993.237	1167.53	983.941
YDL110C::chr4_2:up	519.46	515.263	459.521
YDL112W::chr4_2:up	462.749	432.985	439.05
YDL113C::chr4_2:up	261.109	90.0965	179.888
YDL114W::chr4_2:up	339.481	363.737	381.991
YDL115C::chr4_2:up	64.1941	45.7929	47.041
YDL116W::chr4_2:up	59.4682	25.6887	2.17783
YDL117W::chr4_2:up	255.989	234.921	85.3707
YDL118W::chr4_2:up	1736.39	2088.6	11517.2
YDL119C::chr4_2:up	776.631	1052.12	3204.02
YDL121C::chr4_2:up	640.76	714.071	581.915
YDL122W::chr4_2:up	237.873	269.545	215.605
YDL123W::chr4_2:up	417.853	389.053	300.54
YDL124W::chr4_2:up	186.281	193.968	250.45
YDL125C::chr4_2:up	133.508	228.592	56.6235
YDL127W::chr4_2:up	233.541	253.164	54.4456
YDL129W::chr4_2:up	281.588	340.654	256.983
YDL130W-A::chr00_2:up	1686.77	2192.1	1238.31
YDL130W::chr4_2:up	813.257	615.411	1813.26
YDL131W::chr4_2:up	536.395	795.605	355.421
YDL133C-A::chr00_14:up	516.704	539.835	757.448
YDL133W::chr4_2:up	429.667	357.408	118.909
YDL134C-A::chr4_2:up	366.261	403.573	430.338
YDL134C::chr4_2:up	380.833	366.715	202.973
YDL135C::chr4_2:up	546.635	682.798	517.451
YDL136W::chr4_2:up	1666.68	1272.15	3846.91
YDL137W::chr4_2:up	253.232	322.784	83.6285
YDL138W::chr4_2:up	269.773	202.531	116.296
YDL142C::chr4_2:up	361.141	370.438	523.549
YDL144C::chr4_2:up	398.161	686.893	679.917
YDL146W::chr4_2:up	233.541	241.995	51.3967
YDL149W::chr4_2:up	302.067	271.034	259.597
YDL154W::chr4_2:up	3046.27	3731.93	2976.65
YDL155W::chr4_2:up	186.281	244.229	370.666
YDL156W::chr4_2:up	654.15	583.766	562.314
YDL157C::chr4_2:up	298.129	452.344	398.106
YDL160C::chr4_2:up	68.1324	67.3862	48.7833
YDL161W::chr4_2:up	523.793	660.46	635.054
YDL162C::chr4_2:up	502.92	632.537	731.749
YDL167C::chr4_2:up	456.448	534.622	809.28
YDL168W::chr4_2:up	485.591	483.617	384.604
YDL169C::chr4_2:up	366.261	389.798	248.272
YDL170W::chr4_2:up	449.753	547.653	489.14
YDL171C::chr4_2:up	504.889	499.626	476.508
YDL172C::chr4_2:up	135.477	270.29	838.898
YDL173W::chr4_2:up	129.964	80.789	609.355
YDL174C::chr4_2:up	383.589	320.178	209.071
YDL176W::chr4_2:up	890.841	1006.33	743.945
YDL177C::chr4_2:up	625.4	736.409	533.132
YDL178W::chr4_2:up	436.363	489.202	246.094
YDL179W::chr4_2:up	426.517	650.78	670.77
YDL180W::chr4_2:up	470.232	567.385	349.323
YDL182W::chr4_2:up	493.468	488.457	759.19
YDL183C::chr4_2:up	257.17	239.389	179.017
YDL184C::chr4_2:up	378.076	461.652	511.353
YDL186W::chr4_2:up	402.493	388.681	554.91
YDL187C::chr4_2:up	307.187	374.161	451.245
YDL188C::chr4_2:up	437.15	560.311	257.854
YDL189W::chr4_2:up	1086.57	1308.26	1267.93
YDL190C::chr4_2:up	395.404	743.855	621.987
YDL191W::chr4_3:up	176.829	68.8754	468.668
YDL192W::chr4_3:up	11.8149	69.2477	39.6364
YDL194W::chr00_16b:up	1819.88	1321.29	10991
YDL197C::chr4_3:up	337.118	385.33	632.44
YDL198C::chr4_3:up	514.341	326.135	613.711
YDL199C::chr4_3:up	159.501	577.065	519.629
YDL200C::chr4_3:up	628.945	791.882	789.244
YDL201W::chr4_3:up	576.566	602.009	357.163
YDL202W::chr4_3:up	583.261	576.32	1659.07
YDL203C::chr4_3:up	441.089	473.193	266.13
YDL204W::chr4_3:up	222.907	370.811	393.315
YDL210W::chr4_3:up	2923.79	3846.23	3171.35
YDL211C::chr4_3:up	277.256	457.556	90.5975
YDL213C::chr4_3:up	37.4138	65.5248	57.059
YDL215C::chr4_3:up	395.404	517.497	420.756
YDL216C::chr4_3:up	289.858	250.93	186.857
YDL218W::chr4_3:up	290.646	282.575	252.628
YDL219W::chr4_3:up	296.553	400.595	246.53
YDL222C::chr4_3:up	475.745	584.138	774.435
YDL223C::chr4_3:up	168.559	237.9	196.44
YDL224C::chr4_3:up	534.82	608.71	226.058
YDL225W::chr4_3:up	173.679	204.02	153.319
YDL226C::chr4_3:up	64.1941	219.285	246.965
YDL227C::chr4_3:up	471.807	827.622	592.804
YDL229W::chr4_3:up	219.363	417.348	203.409
YDL230W::chr4_3:up	279.619	236.41	163.772
YDL231C::chr4_3:up	621.462	668.278	199.489
YDL233W::chr4_3:up	317.82	313.849	218.218
YDL234C::chr4_3:up	333.573	542.441	212.991
YDL236W::chr4_3:up	538.758	639.239	516.58
YDL237W::chr4_3:up	283.163	371.927	196.004
YDL238C::chr4_3:up	102.396	150.409	107.585
YDL239C::chr4_3:up	247.718	1.4892	187.729
YDL240W::chr4_3:up	360.354	294.861	279.197
YDL241W::chr4_3:up	6.69509	58.4511	24.8272
YDL242W::chr4_3:up	422.579	594.563	436.001
YDL243C::chr4_3:up	161.47	274.385	31.3607
YDR001C::chr4_3:up	433.606	401.711	292.7
YDR003W::chr4_3:up	467.081	517.869	360.648
YDR004W::chr4_3:up	276.074	321.667	289.215
YDR005C::chr4_3:up	206.366	373.789	189.035
YDR006C::chr4_3:up	129.57	286.671	364.568
YDR007W::chr00_16b:up	55.5299	39.4638	260.468
YDR008C::chr4_3:up	6.69509	18.2427	334.95
YDR009W::chr4_3:up	238.267	299.701	464.748
YDR010C::chr4_3:up	593.894	919.208	443.405
YDR011W::chr4_3:up	657.301	858.523	446.454
YDR014W::chr4_3:up	368.624	758.747	457.779
YDR015C::chr4_3:up	432.424	564.779	544.892
YDR017C::chr4_3:up	632.096	282.203	3.48452
YDR018C::chr4_3:up	530.094	635.516	510.482
YDR019C::chr4_3:up	371.775	358.152	526.598
YDR020C::chr4_3:up	793.959	973.191	519.629
YDR022C::chr4_3:up	176.829	344.75	324.932
YDR024W::chr4_3:up	227.239	171.63	251.757
YDR025W::chr4_3:up	358.384	242.367	450.81
YDR026C::chr4_3:up	446.208	641.845	374.586
YDR027C::chr4_3:up	59.862	0	0
YDR028C::chr4_3:up	1536.72	1531.27	12485.9
YDR029W::chr4_3:up	1621.39	1946.01	986.555
YDR030C::chr4_3:up	137.446	160.089	140.252
YDR031W::chr4_3:up	468.657	509.306	438.178
YDR032C::chr4_3:up	295.372	214.445	301.411
YDR033W::chr4_3:up	532.063	928.888	1072.36
YDR034C::chr4_3:up	69.7077	58.4511	60.5435
YDR035W::chr4_3:up	191.007	150.037	501.335
YDR036C::chr4_3:up	223.695	303.424	109.327
YDR042C::chr4_3:up	240.63	374.534	235.641
YDR043C::chr4_3:up	493.862	434.101	2023.64
YDR046C::chr4_3:up	487.56	629.559	415.093
YDR048C::chr00_16b:up	202.822	293.744	95.3887
YDR049W::chr4_4:up	2010.1	2709.6	1658.63
YDR051C::chr4_4:up	723.464	708.859	603.258
YDR055W::chr4_4:up	398.555	372.3	105.842
YDR056C::chr4_4:up	331.604	332.091	718.682
YDR057W::chr4_4:up	152.412	134.4	135.896
YDR058C::chr00_14:up	151.624	77.8106	32.6674
YDR059C::chr4_4:up	386.74	473.565	604.564
YDR061W::chr4_4:up	391.466	366.343	343.661
YDR063W::chr4_4:up	285.526	360.014	311.865
YDR065W::chr4_4:up	600.589	483.99	2597.27
YDR066C::chr4_4:up	522.611	762.47	309.251
YDR067C::chr4_4:up	960.549	882.723	173.79
YDR068W::chr4_4:up	496.225	481.384	357.599
YDR069C::chr4_4:up	181.161	258.004	23.9561
YDR070C::chr4_4:up	150.443	193.968	196.44
YDR071C::chr00_11:up	933.375	970.585	774.435
YDR072C::chr4_4:up	608.86	969.468	589.319
YDR073W::chr4_4:up	1028.29	1616.53	432.516
YDR074W::chr00_11:up	851.852	723.378	354.985
YDR075W::chr4_4:up	302.461	361.131	299.233
YDR076W::chr4_4:up	861.698	650.035	548.376
YDR077W::chr4_4:up	550.967	717.049	809.28
YDR078C::chr4_4:up	281.194	405.434	493.931
YDR080W::chr4_4:up	215.818	205.882	68.3837
YDR083W::chr4_4:up	752.213	714.071	78.8373
YDR084C::chr4_4:up	367.442	550.631	496.98
YDR085C::chr4_4:up	847.52	1259.49	1305.82
YDR089W::chr4_4:up	666.359	752.418	823.218
YDR090C::chr4_4:up	545.453	766.565	536.181
YDR093W::chr4_4:up	380.045	466.119	423.805
YDR094W::chr4_4:up	456.842	517.497	446.89
YDR095C::chr4_4:up	663.996	637.005	877.664
YDR096W::chr4_4:up	1031.83	1175.72	103.229
YDR097C::chr4_4:up	632.489	832.834	552.296
YDR098C::chr4_4:up	391.466	490.691	473.895
YDR099W::chr4_4:up	424.154	563.662	245.659
YDR100W::chr4_4:up	431.243	616.528	258.726
YDR101C::chr4_4:up	727.796	620.624	453.423
YDR102C::chr4_4:up	281.194	298.957	331.029
YDR104C::chr4_4:up	541.909	613.178	817.991
YDR107C::chr4_4:up	500.163	786.297	511.789
YDR108W::chr4_4:up	592.319	405.807	309.251
YDR109C::chr4_4:up	273.711	355.919	289.651
YDR110W::chr4_4:up	481.653	587.861	845.432
YDR111C::chr4_4:up	365.08	539.462	532.26
YDR112W::chr4_4:up	513.159	450.483	490.446
YDR114C::chr4_4:up	660.845	662.321	1269.67
YDR115W::chr4_4:up	626.976	402.456	1007.46
YDR116C::chr4_4:up	250.081	294.861	805.36
YDR117C::chr4_4:up	340.662	423.305	368.488
YDR119W::chr4_4:up	536.789	705.508	295.313
YDR120C::chr4_4:up	684.081	913.251	480.864
YDR121W::chr4_4:up	1214.17	1539.83	780.968
YDR122W::chr4_4:up	419.428	546.164	247.836
YDR123C::chr4_4:up	606.497	787.786	517.016
YDR124W::chr4_4:up	320.577	412.88	47.4766
YDR125C::chr4_4:up	808.137	707.369	253.499
YDR126W::chr4_4:up	345.782	249.441	0.435565
YDR128W::chr4_4:up	1507.18	1404.69	1440.85
YDR130C::chr4_4:up	280.8	436.708	344.096
YDR131C::chr4_4:up	430.455	651.152	481.299
YDR132C::chr4_4:up	379.257	470.959	540.536
YDR133C::chr4_4:up	461.568	593.818	700.389
YDR134C::chr4_4:up	518.279	644.823	488.704
YDR135C::chr4_4:up	276.862	381.98	149.399
YDR136C::chr4_4:up	975.121	1209.97	1287.53
YDR137W::chr4_4:up	456.448	579.671	560.137
YDR138W::chr4_4:up	30.7187	20.4765	81.8862
YDR139C::chr4_4:up	284.738	206.626	116.731
YDR140W::chr4_4:up	365.473	294.489	30.9251
YDR142C::chr4_4:up	461.174	407.296	496.109
YDR143C::chr4_4:up	8.66424	33.1347	45.7343
YDR144C::chr4_4:up	312.306	408.413	604.129
YDR146C::chr4_4:up	447.39	566.268	331.465
YDR147W::chr4_5:up	751.032	1287.78	742.638
YDR148C::chr4_5:up	194.945	183.171	27.005
YDR149C::chr4_5:up	94.9128	97.1702	624.165
YDR150W::chr4_5:up	223.301	189.128	705.615
YDR151C::chr4_5:up	824.284	1005.58	222.138
YDR152W::chr4_5:up	1589.1	1497.39	1487.89
YDR153C::chr4_5:up	1189.76	1435.59	618.502
YDR154C::chr4_5:up	1200	1284.06	1002.24
YDR155C::chr4_5:up	115.786	86.0012	149.834
YDR156W::chr4_5:up	1805.31	1815.71	859.805
YDR157W::chr4_5:up	861.304	1086.74	824.525
YDR158W::chr4_5:up	12.2087	12.2859	48.3477
YDR159W::chr4_5:up	255.595	218.168	266.566
YDR161W::chr4_5:up	195.339	133.656	0.87113
YDR162C::chr4_5:up	439.907	552.12	1112.43
YDR163W::chr4_5:up	369.805	360.758	318.834
YDR165W::chr4_5:up	8.27041	8.56289	14.3736
YDR169C::chr4_5:up	594.288	841.025	322.754
YDR171W::chr4_5:up	1132.26	1028.29	717.376
YDR173C::chr4_5:up	13.3902	6.70139	41.3787
YDR174W::chr00_14:up	430.455	280.342	115.86
YDR176W::chr4_5:up	15.7532	10.0521	15.2448
YDR178W::chr4_5:up	467.081	588.978	517.016
YDR179W-A::chr4_5:up	10.6334	33.507	3.48452
YDR181C::chr4_5:up	1330.35	1363.73	1845.49
YDR183W::chr4_5:up	561.6	542.441	392.444
YDR184C::chr4_5:up	2078.24	2962.76	1305.39
YDR185C::chr4_5:up	1172.43	1563.29	909.46
YDR186C::chr4_5:up	514.735	482.5	584.964
YDR191W::chr4_5:up	1002.29	1217.79	682.095
YDR192C::chr4_5:up	1210.24	1471.7	1328.04
YDR193W::chr4_5:up	1992.77	2343.63	3106.89
YDR195W::chr4_5:up	1221.26	1102.38	60.108
YDR197W::chr4_5:up	39.3829	93.8195	72.7394
YDR198C::chr4_5:up	1250.8	1424.05	1137.26
YDR200C::chr4_5:up	51.5916	49.5159	50.9611
YDR202C::chr00_14:up	291.433	323.156	644.201
YDR203W::chr4_5:up	396.98	364.109	547.941
YDR204W::chr4_5:up	414.308	479.15	1088.04
YDR205W::chr00_14:up	4230.51	5025.3	5108.31
YDR206W::chr4_5:up	535.607	590.84	639.845
YDR207C::chr4_5:up	423.366	376.023	41.8142
YDR209C::chr4_5:up	1126.35	1467.23	1500.96
YDR210W::chr4_5:up	1541.84	1614.29	1299.73
YDR213W::chr4_5:up	587.199	695.828	644.201
YDR214W::chr4_5:up	766.391	946.758	633.312
YDR215C::chr4_5:up	1434.33	1655.24	1734.86
YDR216W::chr4_5:up	600.983	622.857	752.656
YDR217C::chr4_5:up	307.974	424.049	341.919
YDR218C::chr4_5:up	930.224	804.167	821.911
YDR219C::chr4_5:up	649.424	870.809	971.746
YDR220C::chr4_5:up	242.205	354.057	501.771
YDR221W::chr4_5:up	819.558	998.136	1475.26
YDR222W::chr4_5:up	1088.15	1136.26	1345.02
YDR223W::chr4_5:up	569.871	427.028	255.241
YDR225W::chr4_5:up	407.219	193.596	566.67
YDR229W::chr4_5:up	1026.32	868.948	962.163
YDR230W::chr4_5:up	160.288	157.11	240.432
YDR231C::chr4_5:up	11.0272	9.67979	16.1159
YDR233C::chr4_5:up	1810.83	1291.88	971.746
YDR234W::chr4_5:up	868.393	643.334	1082.81
YDR237W::chr4_5:up	27.568	20.4765	73.6105
YDR239C::chr4_5:up	314.669	351.451	396.8
YDR241W::chr4_5:up	237.085	116.53	64.4636
YDR242W::chr00_17a:up	197.308	193.968	175.968
YDR244W::chr4_6:up	146.111	83.7674	124.136
YDR245W::chr4_6:up	18.9038	2.2338	48.3477
YDR247W::chr4_6:up	72.8584	42.4422	45.7343
YDR248C::chr4_6:up	192.582	109.456	152.448
YDR249C::chr4_6:up	99.6387	74.8322	151.577
YDR250C::chr4_6:up	61.0435	45.0483	15.6803
YDR251W::chr4_6:up	153.987	141.474	118.474
YDR252W::chr4_6:up	110.272	71.1092	45.2988
YDR253C::chr4_6:up	123.268	96.0533	78.4017
YDR254W::chr4_6:up	271.742	179.821	180.759
YDR256C::chr4_6:up	334.361	178.332	131.541
YDR257C::chr4_6:up	119.724	73.7153	37.8942
YDR258C::chr4_6:up	105.152	81.9059	81.8862
YDR259C::chr4_6:up	346.57	193.596	177.275
YDR260C::chr4_6:up	46.4718	21.2211	30.9251
YDR261C::chr4_6:up	152.412	99.7763	111.505
YDR262W::chr4_6:up	131.539	93.8195	55.7523
YDR263C::chr4_6:up	46.4718	20.8488	22.6494
YDR264C::chr4_6:up	14.5717	16.3812	0
YDR265W::chr4_6:up	204.791	118.019	140.688
YDR266C::chr4_6:up	42.5335	13.4028	11.7603
YDR268W::chr4_6:up	264.259	96.7979	43.9921
YDR269C::chr4_6:up	86.6424	61.0572	58.8013
YDR271C::chr4_6:up	22.4483	12.2859	3.92009
YDR272W::chr4_6:up	190.219	92.3303	87.113
YDR273W::chr4_6:up	111.06	67.7585	57.9301
YDR274C::chr4_6:up	66.5571	53.6112	38.7653
YDR275W::chr4_6:up	34.657	16.3812	53.1389
YDR276C::chr4_6:up	70.4954	20.1042	0
YDR277C::chr4_6:up	51.1978	22.7103	22.6494
YDR278C::chr4_6:up	31.1125	14.1474	14.3736
YDR279W::chr4_6:up	60.2558	43.5591	67.9481
YDR281C::chr4_6:up	913.29	730.452	740.896
YDR282C::chr4_6:up	59.0744	36.8577	33.1029
YDR283C::chr4_6:up	99.6387	44.676	118.474
YDR284C::chr4_6:up	67.7386	56.9619	33.5385
YDR285W::chr4_6:up	9.84573	4.8399	12.1958
YDR286C::chr4_6:up	162.258	126.582	123.7
YDR287W::chr4_6:up	342.631	227.475	373.279
YDR290W::chr4_6:up	3.93829	0.744599	16.1159
YDR291W::chr4_6:up	395.011	360.014	294.006
YDR293C::chr4_6:up	134.69	77.4383	274.842
YDR294C::chr4_6:up	360.354	208.488	208.636
YDR295C::chr4_6:up	74.8275	56.2173	148.092
YDR296W::chr4_6:up	182.737	61.4295	238.69
YDR297W::chr4_6:up	559.631	373.044	506.127
YDR298C::chr4_6:up	79.5535	39.4638	58.8013
YDR300C::chr4_6:up	481.259	158.227	607.178
YDR304C::chr4_6:up	533.638	584.511	395.929
YDR305C::chr4_6:up	358.778	163.812	137.639
YDR306C::chr4_6:up	190.613	193.968	116.731
YDR307W::chr4_6:up	127.207	64.7802	73.6105
YDR309C::chr4_6:up	105.152	80.789	79.7084
YDR310C::chr4_6:up	1238.99	657.854	305.767
YDR312W::chr4_6:up	211.092	145.197	74.9172
YDR313C::chr4_6:up	181.949	69.9923	59.2368
YDR314C::chr4_6:up	406.825	273.268	308.38
YDR316W::chr4_6:up	122.481	61.4295	22.6494
YDR317W::chr4_6:up	248.112	168.279	56.6235
YDR318W::chr4_6:up	74.0399	51.0051	40.072
YDR319C::chr4_6:up	1000.72	637.749	599.337
YDR320C::chr4_6:up	52.3793	43.9314	57.9301
YDR321W::chr4_6:up	217.787	198.436	229.543
YDR322W::chr4_6:up	96.8819	68.8754	178.146
YDR323C::chr4_6:up	28.7495	5.5845	0.435565
YDR326C::chr00_17a:up	337.905	312.359	326.674
YDR329C::chr4_6:up	210.699	124.348	145.914
YDR330W::chr4_6:up	109.484	67.7585	56.1879
YDR332W::chr4_6:up	37.0199	13.7751	52.7034
YDR333C::chr4_6:up	141.385	74.0876	32.2318
YDR334W::chr4_6:up	231.965	166.046	25.6983
YDR335W::chr4_6:up	116.967	53.6112	38.3297
YDR337W::chr4_6:up	102.002	56.2173	88.4197
YDR338C::chr4_7:up	393.829	260.238	93.2109
YDR340W::chr4_7:up	323.727	188.756	200.795
YDR344C::chr4_7:up	405.25	234.921	319.269
YDR345C::chr4_7:up	136.659	109.084	117.167
YDR346C::chr4_7:up	70.1016	68.8754	111.069
YDR347W::chr4_7:up	560.025	327.996	365.875
YDR348C::chr4_7:up	373.35	236.41	178.146
YDR349C::chr4_7:up	626.582	500.743	1425.17
YDR351W::chr4_7:up	117.755	68.5031	65.7703
YDR352W::chr4_7:up	208.729	145.941	92.7754
YDR354W::chr4_7:up	9.4519	13.0305	43.9921
YDR357C::chr4_7:up	144.141	103.872	128.492
YDR358W::chr4_7:up	110.272	74.8322	54.8812
YDR359C::chr4_7:up	17.7223	9.30749	0
YDR360W::chr4_7:up	225.27	262.099	194.262
YDR363W-A::chr00_2:up	1734.82	1209.6	1891.66
YDR363W::chr4_7:up	199.671	112.062	107.585
YDR368W::chr4_7:up	136.265	108.339	127.185
YDR369C::chr4_7:up	55.5299	50.6328	35.2808
YDR370C::chr4_7:up	233.934	198.808	183.373
YDR371W::chr4_7:up	1330.35	1158.97	1242.23
YDR372C::chr4_7:up	1185.82	969.841	764.417
YDR374C::chr4_7:up	121.299	138.868	121.087
YDR375C::chr4_7:up	22.8421	9.30749	10.018
YDR377W::chr4_7:up	14.5717	7.07369	8.7113
YDR378C::chr4_7:up	632.489	479.15	488.704
YDR379W::chr4_7:up	174.86	116.902	63.5925
YDR380W::chr4_7:up	391.072	401.711	348.016
YDR383C::chr4_7:up	113.423	144.08	91.0331
YDR384C::chr4_7:up	455.66	521.964	193.826
YDR385W::chr4_7:up	717.163	398.361	245.223
YDR386W::chr4_7:up	303.248	247.952	230.414
YDR387C::chr4_7:up	70.4954	68.1308	7.40461
YDR388W::chr4_7:up	294.584	180.565	0.435565
YDR389W::chr4_7:up	63.4065	48.7713	59.2368
YDR391C::chr4_7:up	530.488	524.943	936.029
YDR393W::chr4_7:up	305.611	213.7	297.926
YDR395W::chr4_7:up	400.918	291.883	121.087
YDR399W::chr4_7:up	118.543	97.5425	31.7962
YDR400W::chr4_7:up	194.158	80.0444	99.3088
YDR402C::chr4_7:up	301.673	177.959	242.61
YDR403W::chr4_7:up	481.259	314.593	238.254
YDR405W::chr4_7:up	508.433	348.845	1039.69
YDR406W::chr4_7:up	267.41	205.509	118.909
YDR408C::chr4_7:up	61.4373	46.5375	129.798
YDR409W::chr4_7:up	334.361	273.268	238.254
YDR411C::chr4_7:up	324.121	372.3	237.819
YDR414C::chr4_7:up	1194.48	670.884	541.843
YDR415C::chr4_7:up	135.477	72.2261	62.7214
YDR417C::chr00_17a/chr00_18:up	569.477	376.395	286.602
YDR418W::chr4_7:up	979.453	796.349	925.576
YDR419W::chr4_7:up	352.477	354.429	415.529
YDR420W::chr4_7:up	119.724	89.7242	115.425
YDR421W::chr4_7:up	174.466	173.492	31.7962
YDR422C::chr4_7:up	31.5063	18.9873	8.27574
YDR423C::chr4_7:up	307.187	245.346	165.515
YDR424C::chr00_8:up	165.014	133.283	142.43
YDR425W::chr4_7:up	237.085	164.556	139.816
YDR426C::chr4_7:up	239.054	154.504	238.254
YDR428C::chr4_7:up	115.786	106.478	43.1209
YDR430C::chr4_7:up	634.065	596.052	429.032
YDR431W::chr4_7:up	255.595	174.609	303.589
YDR432W::chr4_7:up	26.3865	27.9225	73.6105
YDR433W::chr4_7:up	72.0707	64.7802	215.169
YDR435C::chr4_7:up	282.375	259.121	52.7034
YDR436W::chr4_7:up	817.983	685.031	546.634
YDR438W::chr4_8:up	633.277	610.572	523.985
YDR439W::chr4_8:up	540.333	340.282	133.283
YDR440W::chr4_8:up	218.969	216.678	118.038
YDR441C::chr4_8:up	373.744	399.478	287.908
YDR442W::chr4_8:up	658.482	283.32	0.435565
YDR443C::chr4_8:up	362.323	278.852	75.7883
YDR444W::chr00_17a:up	232.359	186.894	138.945
YDR445C::chr00_14:up	267.016	233.06	344.532
YDR446W::chr4_8:up	228.815	242.367	303.153
YDR447C::chr4_8:up	987.329	663.81	565.799
YDR448W::chr4_8:up	104.365	79.6721	25.6983
YDR450W::chr4_8:up	298.916	108.712	45.7343
YDR451C::chr4_8:up	456.842	335.442	148.092
YDR452W::chr4_8:up	101.214	5.9568	315.349
YDR455C::chr4_8:up	57.1052	46.1652	0
YDR456W::chr4_8:up	24.8112	4.0953	0
YDR457W::chr4_8:up	801.442	616.156	95.8243
YDR458C::chr4_8:up	1.18149	4.4676	0.435565
YDR459C::chr4_8:up	179.586	139.24	131.976
YDR461W::chr00_17a:up	1156.68	843.259	635.925
YDR463W::chr4_8:up	1041.68	808.635	371.973
YDR465C::chr4_8:up	247.325	293.744	87.113
YDR466W::chr4_8:up	228.027	198.436	175.533
YDR469W::chr4_8:up	293.403	416.603	252.628
YDR474C::chr4_8:up	187.069	222.635	228.236
YDR475C::chr4_8:up	212.668	165.673	0.435565
YDR476C::chr4_8:up	363.504	311.987	392.009
YDR477W::chr4_8:up	676.598	765.076	107.585
YDR479C::chr4_8:up	200.459	301.563	251.321
YDR480W::chr4_8:up	440.695	493.297	575.817
YDR481C::chr4_8:up	428.486	390.915	392.88
YDR482C::chr4_8:up	187.463	231.57	243.045
YDR483W::chr4_8:up	1226.78	1154.13	1098.06
YDR484W::chr4_8:up	182.737	160.461	273.535
YDR485C::chr4_8:up	495.437	293.744	72.3038
YDR486C::chr4_8:up	545.847	453.089	85.8063
YDR488C::chr4_8:up	93.3375	112.435	121.958
YDR490C::chr4_8:up	313.488	277.363	469.539
YDR491C::chr4_8:up	484.016	371.183	166.386
YDR492W::chr4_8:up	752.213	620.251	196.44
YDR493W::chr00_17a:up	512.765	538.345	503.513
YDR494W::chr4_8:up	161.47	130.305	115.425
YDR495C::chr4_8:up	320.183	225.241	73.1749
YDR496C::chr4_8:up	173.285	80.4167	54.8812
YDR497C::chr4_8:up	792.778	784.063	506.998
YDR500C::chr00_17a:up	768.754	504.094	385.911
YDR500C::chr4_8:up	293.009	214.445	65.3348
YDR501W::chr4_8:up	487.56	499.626	553.603
YDR502C::chr00_17a:up	528.912	457.929	521.807
YDR503C::chr4_8:up	333.967	301.935	211.249
YDR504C::chr4_8:up	429.667	227.103	191.649
YDR505C::chr4_8:up	485.985	528.293	442.098
YDR506C::chr00_17a:up	663.602	734.175	847.174
YDR506C::chr4_8:up	277.256	169.769	331.465
YDR507C::chr4_8:up	542.696	477.661	845.867
YDR508C::chr4_8:up	554.117	509.306	263.081
YDR509W::chr4_8:up	545.059	199.553	93.2109
YDR511W::chr4_8:up	281.194	202.903	204.716
YDR512C::chr00_17a:up	131.539	67.3862	104.536
YDR512C::chr4_8:up	182.737	158.972	208.2
YDR513W::chr4_8:up	516.31	471.704	762.239
YDR514C::chr4_8:up	221.726	193.968	86.2419
YDR515W::chr00_17a:up	302.855	301.935	243.045
YDR516C::chr4_8:up	1.57532	97.9148	100.616
YDR517W::chr4_8:up	245.355	45.0483	261.775
YDR518W::chr4_8:up	1191.33	1052.12	3334.25
YDR519W::chr4_8:up	215.424	112.435	81.0151
YDR520C::chr4_8:up	308.762	463.141	354.985
YDR521W::chr4_8:up	1257.5	1398.36	1795.4
YDR522C::chr4_8:up	422.972	420.326	684.708
YDR523C::chr4_8:up	318.214	288.532	223.445
YDR524C::chr4_8:up	348.539	259.865	271.793
YDR525W-A::chr00_2:up	707.317	958.672	753.963
YDR525W::chr4_8:up	1761.2	1515.63	1154.68
YDR528W::chr4_8:up	756.939	820.549	733.492
YDR529C::chr4_8:up	732.916	573.714	633.312
YDR530C::chr4_8:up	726.221	620.996	584.093
YDR532C::chr4_8:up	36.2323	0	0
YDR533C::chr4_8:up	251.263	259.121	569.283
YDR534C::chr4_8:up	617.918	764.331	532.696
YDR535C::chr00_2:up	131.539	80.789	72.3038
YDR536W::chr00_2:up	612.404	462.769	483.477
YDR537C::chr00_14:up	525.762	515.263	360.212
YDR538W::chr00_2:up	372.956	490.691	644.636
YDR539W::chr00_2:up	1081.06	1219.28	1228.73
YDR540C::chr00_2:up	186.281	125.837	290.086
YDR541C::chr00_2:up	606.497	588.978	596.724
YEL001C::chr5_2:up	4719.25	5414.73	4751.58
YEL003W::chr5_2:up	1888.02	1362.62	272.228
YEL004W::chr5_2:up	772.299	859.268	652.476
YEL005C::chr5_2:up	321.758	279.225	126.314
YEL006W::chr5_2:up	206.76	127.327	142.43
YEL008W::chr5_2:up	77.9781	61.4295	56.6235
YEL009C::chr5_2:up	463.143	434.846	1755.76
YEL010W::chr5_2:up	460.386	551.748	674.69
YEL011W::chr00_8:up	291.433	282.575	218.654
YEL012W::chr00_10:up	211.092	103.499	67.9481
YEL014C::chr5_2:up	601.771	578.181	540.101
YEL015W::chr5_2:up	317.032	411.763	107.149
YEL016C::chr5_2:up	973.152	1021.22	598.466
YEL017C-A::chr5_2:up	318.214	357.408	445.583
YEL017W::chr5_2:up	166.196	151.898	136.332
YEL018W::chr5_2:up	224.483	267.311	229.107
YEL020C::chr5_2:up	362.717	198.436	245.659
YEL023C::chr5_2:up	595.863	829.111	643.765
YEL025C::chr5_2:up	628.157	565.151	328.852
YEL027W::chr5_2:up	37.8076	34.2516	0.87113
YEL028W::chr5_2:up	162.651	103.499	102.793
YEL029C::chr5_2:up	43.715	7.44599	0
YEL030W::chr5_2:up	169.74	139.985	174.226
YEL031W::chr5_2:up	238.267	104.244	198.182
YEL037C::chr5_2:up	837.281	705.508	446.89
YEL038W::chr5_2:up	732.916	663.066	730.878
YEL039C::chr5_2:up	1769.47	1922.93	1656.45
YEL040W::chr5_2:up	2524.84	2534.62	1839.39
YEL041W::chr5_2:up	1795.47	2402.45	2764.53
YEL042W::chr5_2:up	4989.81	4987.33	4177.07
YEL043W::chr5_2:up	2330.29	2541.32	1411.67
YEL047C::chr5_2:up	3874.49	4628.8	5327.83
YEL048C::chr5_2:up	3293.2	3668.64	3635.66
YEL049W::chr5_2:up	437.938	728.963	473.459
YEL050C::chr5_2:up	827.435	387.936	186.422
YEL052W::chr5_2:up	432.818	573.342	567.977
YEL053C::chr5_2:up	53.9546	51.3774	70.126
YEL054C::chr5_2:up	733.31	503.349	1158.17
YEL056W::chr5_2:up	567.508	558.822	635.054
YEL057C::chr5_2:up	3646.07	4502.97	6357.94
YEL059W::chr5_2:up	4314.4	5035.35	4445.38
YEL060C::chr5_2:up	140.203	123.231	77.9661
YEL061C::chr5_2:up	882.571	1128.81	331.901
YEL062W::chr5_2:up	189.432	174.236	123.7
YEL063C::chr5_2:up	164.227	115.413	158.546
YEL064C::chr5_2:up	81.5226	88.9796	119.78
YEL065W::chr5_2:up	210.699	142.591	159.852
YEL066W::chr5_2:up	237.479	317.199	265.695
YEL067C::chr5_2:up	446.602	354.429	313.607
YEL068C::chr5_2:up	674.629	473.193	664.672
YEL071W::chr5_2:up	537.97	532.761	454.294
YEL072W::chr5_2:up	328.06	380.49	132.412
YER001W::chr5_2:up	1060.19	1224.49	680.353
YER002W::chr5_2:up	793.565	827.622	622.422
YER004W::chr5_2:up	500.163	564.034	452.988
YER005W::chr5_2:up	684.869	642.589	637.232
YER007C-A::chr5_2:up	1937.24	1580.78	3358.64
YER007W::chr5_2:up	361.929	451.227	449.503
YER010C::chr5_2:up	135.477	346.611	306.638
YER011W::chr5_2:up	215.818	308.264	194.698
YER016W::chr5_3:up	681.324	639.239	429.032
YER017C::chr5_3:up	354.052	157.11	252.192
YER019C-A::chr5_3:up	272.136	192.479	359.341
YER019W::chr5_3:up	301.673	388.681	114.989
YER020W::chr5_3:up	941.645	634.026	243.481
YER024W::chr5_3:up	299.704	185.405	204.28
YER027C::chr00_11:up	847.52	1304.91	719.989
YER028C::chr5_3:up	493.074	368.204	397.235
YER030W::chr5_3:up	461.174	501.86	513.096
YER031C::chr00_10:up	46.078	20.4765	6.53348
YER032W::chr5_3:up	789.627	999.997	798.391
YER033C::chr5_3:up	428.88	270.662	313.171
YER034W::chr5_3:up	944.796	961.65	892.908
YER037W::chr00_11:up	700.622	642.217	876.357
YER038W-A::chr5_3:up	1019.62	1238.27	944.741
YER039C-A::chr00_2:up	1059.79	1073.34	1038.82
YER039C::chr5_3:up	51.1978	54.3558	20.036
YER040W::chr5_3:up	1305.15	1384.21	831.494
YER041W::chr5_3:up	284.738	177.215	118.474
YER042W::chr5_3:up	248.112	158.6	135.025
YER044C-A::chr5_3:up	660.845	734.92	737.847
YER044C::chr5_3:up	31.1125	3.723	103.229
YER045C::chr5_3:up	780.175	889.052	666.85
YER046W-A::chr5_3:up	148.08	85.6289	103.229
YER046W::chr00_10:up	370.987	330.23	152.012
YER048C::chr5_3:up	844.369	950.853	640.716
YER049W::chr5_3:up	812.469	1522.71	1396.86
YER050C::chr5_3:up	1566.65	1950.11	4160.08
YER051W::chr5_3:up	197.702	195.83	147.657
YER053C::chr5_3:up	374.925	231.198	208.636
YER055C::chr5_3:up	325.303	552.12	297.926
YER056C-A::chr5_3:up	2362.19	2356.66	1757.94
YER056C::chr5_3:up	179.192	190.99	44.4276
YER057C::chr5_3:up	391.466	444.898	423.805
YER058W::chr5_3:up	259.927	183.916	377.635
YER059W::chr5_3:up	342.237	481.756	299.669
YER060W-A::chr5_3:up	281.588	225.986	157.239
YER060W::chr5_3:up	1126.35	1232.31	1018.35
YER061C::chr5_3:up	649.03	414.37	894.215
YER062C::chr5_3:up	548.604	513.401	527.034
YER063W::chr00_10:up	421.003	508.934	628.085
YER064C::chr00_8:up	410.764	306.403	282.682
YER065C::chr5_3:up	226.058	191.734	238.254
YER066W::chr00_10:up	108.697	59.568	50.9611
YER067C-A::chr5_3:up	483.622	416.976	282.246
YER067W::chr5_3:up	205.973	131.422	124.572
YER068C-A::chr5_3:up	348.145	384.958	548.812
YER068W::chr5_3:up	18.51	10.4244	12.1958
YER069W::chr5_3:up	262.29	322.039	106.713
YER070W::chr5_3:up	6.69509	0	0
YER071C::chr5_3:up	978.271	1174.61	701.26
YER072W::chr5_3:up	111.454	129.933	263.952
YER073W::chr5_3:up	313.882	380.863	367.617
YER074W::chr5_3:up	1620.21	1536.48	207.765
YER075C::chr5_3:up	456.054	536.112	31.3607
YER077C::chr00_8:up	1142.1	724.495	1430.83
YER078C::chr00_8:up	248.9	359.269	199.053
YER079W::chr5_3:up	199.671	207.743	97.5666
YER080W::chr5_3:up	456.842	454.206	321.447
YER081W::chr5_3:up	480.471	538.718	210.813
YER083C::chr5_3:up	285.92	192.851	224.752
YER084W::chr5_3:up	132.327	122.487	100.616
YER085C::chr5_3:up	263.865	216.306	206.893
YER086W::chr5_3:up	101.214	94.1918	92.3398
YER087C-A::chr5_3:up	242.599	158.6	82.7574
YER087W::chr5_3:up	783.72	456.812	572.332
YER088C::chr00_8:up	383.196	435.218	845.432
YER089C::chr00_17a:up	251.657	274.757	207.329
YER090W::chr00_8:up	38.2014	15.2643	540.101
YER091C-A::chr00_2:up	1085	1215.56	602.822
YER091C::chr00_8:up	47.2595	43.5591	43.5565
YER092W::chr00_8:up	124.056	86.0012	20.9071
YER093C-A::chr00_8:up	304.43	177.587	287.037
YER095W::chr00_8:up	295.766	226.731	223.009
YER096W::chr00_8:up	435.575	262.099	155.932
YER097W::chr00_8:up	173.679	94.9364	99.7444
YER098W::chr00_8:up	667.934	768.799	618.502
YER101C::chr00_5:up	291.827	393.149	356.292
YER103W::chr00_5:up	365.08	284.809	185.551
YER106W::chr00_5:up	601.377	590.84	697.775
YER108C::chr00_5:up	891.235	636.26	962.163
YER109C::chr00_5:up	441.089	361.503	85.8063
YER110C::chr00_5:up	1643.45	1941.17	565.363
YER111C::chr00_5:up	663.996	543.93	437.743
YER113C::chr00_5:up	535.214	706.253	1027.5
YER114C::chr00_5:up	237.479	220.029	152.448
YER115C::chr00_5:up	537.577	340.282	469.975
YER116C::chr00_5:up	50.4101	15.6366	0.87113
YER117W::chr00_5:up	148.867	272.523	311.865
YER118C::chr00_5:up	233.147	3.723	6.96904
YER119C-A::chr00_5:up	534.82	751.673	122.394
YER119C::chr00_5:up	680.537	809.007	539.665
YER120W::chr00_5:up	1237.41	1194.71	723.909
YER121W::chr00_5:up	776.631	844.376	820.605
YER122C::chr00_5:up	348.145	344.377	1702.19
YER123W::chr00_5:up	630.126	587.861	369.359
YER124C::chr00_5:up	490.317	335.442	561.879
YER128W::chr00_5:up	339.087	510.051	415.965
YER129W::chr00_5:up	1203.54	952.343	672.077
YER130C::chr00_5:up	222.907	153.76	239.561
YER131W::chr00_5:up	817.589	678.33	508.304
YER132C::chr00_5:up	487.56	595.307	455.165
YER134C::chr00_5:up	149.261	148.548	102.793
YER135C::chr00_5:up	203.61	255.398	207.765
YER137C::chr00_5:up	405.644	397.616	395.057
YER139C::chr00_5:up	546.241	341.399	402.027
YER140W::chr00_5:up	1450.08	1100.15	1423.43
YER142C::chr00_5:up	137.053	81.9059	67.9481
YER143W::chr00_5:up	52.7731	41.3253	38.3297
YER144C::chr00_2:up	680.143	606.104	381.991
YER145C::chr00_5:up	1286.25	953.087	984.377
YER149C::chr00_5:up	359.566	451.6	908.153
YER150W::chr00_5:up	244.962	215.934	127.185
YER151C::chr00_5:up	535.607	323.528	270.921
YER152C::chr00_5:up	1285.85	1696.57	1194.32
YER154W::chr00_5:up	918.015	848.843	1843.75
YER155C::chr00_5:up	3.93829	3.3507	69.6904
YER156C::chr00_5:up	312.306	420.699	0
YER158C::chr00_5:up	296.553	438.941	469.104
YER161C::chr00_5:up	228.815	234.177	38.3297
YER162C::chr00_5:up	191.007	221.518	116.296
YER163C::chr00_5:up	480.471	723.751	152.448
YER164W::chr00_5:up	836.887	554.354	772.692
YER166W::chr00_5:up	295.766	313.476	365.439
YER167W::chr00_5:up	297.735	316.827	72.7394
YER169W::chr00_5:up	1.18149	5.2122	3.92009
YER170W::chr00_5:up	630.914	563.662	635.489
YER173W::chr00_5:up	499.375	355.546	567.541
YER174C::chr00_5:up	478.502	656.364	807.538
YER175C::chr00_5:up	163.045	196.574	180.759
YER176W::chr00_5:up	53.9546	29.784	18.2937
YER177W::chr00_5:up	85.8547	53.2389	0.435565
YER178W::chr00_5:up	383.589	334.325	1428.65
YER179W::chr00_5:up	1206.69	974.681	1061.47
YER180C::chr00_5:up	283.557	449.738	430.774
YER181C::chr00_5:up	411.945	355.546	378.942
YER182W::chr00_5:up	711.255	639.611	466.926
YER183C::chr00_5:up	434	361.131	238.254
YER184C::chr00_5:up	454.873	400.595	421.627
YER185W::chr00_5:up	488.348	449.366	550.99
YER186C::chr00_5:up	685.263	833.579	643.33
YER187W::chr00_5:up	316.245	342.143	303.153
YER188W::chr00_2:up	146.898	103.127	82.3218
YFL001W::chr00_17a:up	88.2177	46.9098	10.018
YFL003C::chr00_17a:up	336.724	410.274	406.382
YFL004W::chr00_17a:up	400.13	397.616	417.271
YFL006W::chr6_1:up	163.439	113.924	16.1159
YFL007W::chr00_17a:up	452.51	480.267	434.258
YFL010C::chr00_17a:up	267.41	168.652	132.412
YFL010W-A::chr00_17a:up	209.517	268.056	140.252
YFL011W::chr6_1:up	443.845	511.54	466.055
YFL012W::chr00_17a:up	584.048	884.584	689.499
YFL013C::chr00_17a:up	383.196	297.467	94.082
YFL013W-A::chr00_15:up	159.107	102.382	23.9561
YFL014W::chr00_15:up	419.034	588.606	926.447
YFL015C::chr6_1:up	163.439	141.102	110.634
YFL016C::chr00_17a:up	110.666	56.2173	251.757
YFL018C::chr6_1:up	1082.64	1092.7	5356.58
YFL019C::chr00_15:up	480.078	315.338	512.66
YFL020C::chr6_1:up	282.375	190.99	50.5255
YFL021W::chr6_1:up	824.284	997.019	248.708
YFL025C::chr6_1:up	258.352	304.913	1231.78
YFL027C::chr6_1:up	748.669	966.862	386.782
YFL028C::chr6_1:up	300.492	427.4	263.517
YFL030W::chr6_1:up	513.947	758.002	480.428
YFL031W::chr6_1:up	470.626	444.154	575.381
YFL032W::chr6_1:up	57.1052	47.2821	28.7473
YFL033C::chr00_17a/chr00_18:up	3444.43	2209.6	4347.81
YFL034C-A::chr00_2:up	582.473	755.396	711.713
YFL034W::chr6_1:up	455.66	291.511	329.723
YFL035C-B::chr6_1:up	428.88	547.653	387.217
YFL036W::chr6_1:up	574.203	429.634	1221.32
YFL040W::chr6_1:up	353.658	516.007	248.708
YFL041W::chr6_1:up	742.762	903.571	344.967
YFL042C::chr00_15:up	475.352	536.484	438.178
YFL043C::chr6_1:up	661.239	758.747	625.036
YFL044C::chr6_1:up	90.1868	58.8234	55.7523
YFL046W::chr6_1:up	404.462	549.887	637.232
YFL047W::chr6_1:up	211.88	176.47	325.367
YFL048C::chr6_1:up	182.737	134.028	105.407
YFL049W::chr6_1:up	540.333	824.644	184.68
YFL050C::chr6_1:up	421.791	440.431	310.122
YFL051C::chr6_1:up	219.757	317.944	395.057
YFL052W::chr6_1:up	480.078	404.317	802.311
YFL053W::chr6_1:up	509.221	543.93	264.388
YFL054C::chr6_1:up	537.97	594.563	260.468
YFL055W::chr6_1:up	837.281	1023.08	519.194
YFL056C::chr6_1:up	107.515	159.717	263.952
YFL063W::chr00_18:up	364.292	452.716	332.772
YFR001W::chr6_1:up	180.374	110.573	256.983
YFR006W::chr6_1:up	468.263	518.241	545.763
YFR007W::chr6_1:up	189.432	220.774	173.355
YFR008W::chr6_1:up	211.092	168.279	190.342
YFR009W::chr6_1:up	223.301	222.263	302.282
YFR010W::chr6_1:up	443.058	445.643	13.9381
YFR011C::chr00_16b:up	221.726	324.273	215.169
YFR012W::chr6_1:up	494.255	434.101	430.338
YFR013W::chr00_16b:up	699.44	543.185	417.707
YFR014C::chr6_1:up	120.906	79.2998	39.6364
YFR015C::chr6_1:up	516.704	619.134	445.583
YFR016C::chr6_1:up	198.49	122.859	90.162
YFR017C::chr6_1:up	912.502	906.922	901.62
YFR018C::chr6_1:up	658.876	421.816	392.88
YFR020W::chr6_1:up	455.66	455.695	510.482
YFR021W::chr6_1:up	314.276	324.645	222.574
YFR022W::chr6_1:up	629.339	695.456	828.009
YFR023W::chr6_1:up	252.051	177.959	192.955
YFR024C-A::chr6_1:up	237.873	151.898	68.3837
YFR024C::chr00_15:up	1492.61	1634.02	2066.32
YFR025C::chr00_15:up	133.508	92.3303	96.6954
YFR026C::chr6_1:up	339.874	377.884	323.625
YFR030W::chr00_15:up	309.943	184.288	51.3967
YFR031C-A::chr6_1:up	704.166	501.86	196.875
YFR032C-A::chr00_2:up	404.856	197.691	119.78
YFR032C::chr00_2:up	514.341	485.107	436.872
YFR033C::chr00_2:up	927.074	1365.22	1322.81
YFR034C::chr00_2:up	1130.29	1681.31	113.682
YFR035C::chr00_2:up	1787.98	1885.7	945.612
YFR036W::chr00_2:up	419.428	378.629	646.814
YFR038W::chr00_2:up	575.778	567.012	459.521
YFR039C::chr00_14:up	706.135	805.284	858.934
YFR040W::chr00_2:up	1588.31	2014.51	631.569
YFR041C::chr00_2:up	289.071	214.072	165.515
YFR043C::chr00_2:up	761.272	656.364	1216.97
YFR044C::chr00_2:up	859.729	832.462	662.494
YFR045W::chr00_2:up	921.954	725.984	801.44
YFR046C::chr00_2:up	665.571	667.533	283.553
YFR047C::chr00_2:up	928.649	1094.93	1259.65
YFR048W::chr00_2:up	55.5299	97.1702	49.2188
YFR053C::chr00_2:up	633.277	507.445	563.186
YFR054C::chr00_2:up	607.284	469.47	405.947
YFR055W::chr00_2:up	797.898	810.496	715.633
YFR056C::chr00_2:up	1296.88	1154.5	1629.45
YFR057W::chr00_2:up	620.281	841.025	822.347
YGL002W::chr7_1:up	54.3484	78.5552	63.5925
YGL003C::chr7_1:up	1307.51	1118.76	1233.52
YGL004C::chr7_1:up	1396.91	1226.73	1003.98
YGL005C::chr7_1:up	162.258	194.34	240.867
YGL006W::chr7_1:up	1298.45	1524.57	1597.65
YGL007W::chr7_1:up	140.991	150.037	1024.88
YGL009C::chr7_1:up	306.793	337.304	569.719
YGL010W::chr7_1:up	558.056	510.795	659.445
YGL012W::chr7_1:up	78.372	73.7153	0.435565
YGL013C::chr7_1:up	253.232	498.137	194.698
YGL014W::chr7_1:up	615.949	460.162	361.955
YGL015C::chr7_1:up	1009.78	1246.46	1277.51
YGL016W::chr7_1:up	133.114	67.0139	78.4017
YGL017W::chr7_1:up	350.902	533.506	530.954
YGL019W::chr7_1:up	208.729	129.933	31.3607
YGL020C::chr7_1:up	25.5989	10.4244	0
YGL021W::chr7_1:up	386.74	424.794	347.145
YGL023C::chr7_1:up	279.619	290.021	81.4507
YGL025C::chr7_1:up	135.477	180.193	966.954
YGL026C::chr7_1:up	183.918	204.393	1090.22
YGL027C::chr7_1:up	426.911	459.79	825.396
YGL028C::chr7_1:up	660.451	699.551	594.546
YGL031C::chr7_1:up	325.697	265.822	32.6674
YGL032C::chr7_1:up	543.484	652.269	645.507
YGL034C::chr7_1:up	332.786	542.441	310.558
YGL035C::chr7_1:up	312.7	302.307	43.9921
YGL037C::chr7_1:up	3772.88	4560.67	4937.57
YGL039W::chr7_1:up	400.918	493.669	332.772
YGL041C::chr7_1:up	823.103	1040.21	848.916
YGL042C::chr7_1:up	338.693	445.643	324.932
YGL043W::chr7_1:up	127.601	165.673	75.3527
YGL045W::chr7_1:up	427.304	472.076	2.61339
YGL046W::chr7_1:up	876.27	1101.63	31.7962
YGL049C::chr7_1:up	398.949	499.626	536.181
YGL050W::chr7_1:up	360.747	511.912	216.04
YGL051W::chr7_1:up	159.107	195.457	218.654
YGL053W::chr7_1:up	569.083	744.599	961.728
YGL054C::chr7_1:up	173.285	221.146	398.542
YGL056C::chr7_1:up	725.039	582.277	824.525
YGL057C::chr7_1:up	1624.54	2387.93	2087.23
YGL059W::chr7_1:up	341.45	467.236	672.948
YGL060W::chr7_1:up	290.252	284.437	154.19
YGL062W::chr7_1:up	579.323	606.104	587.142
YGL063W::chr7_1:up	925.892	885.701	890.73
YGL066W::chr7_1:up	1473.31	1362.24	4004.15
YGL067W::chr7_1:up	1209.84	1254.65	1763.17
YGL071W::chr7_1:up	355.628	285.926	0.87113
YGL072C::chr7_1:up	775.449	701.04	293.571
YGL077C::chr7_1:up	249.688	294.117	58.8013
YGL078C::chr7_1:up	484.41	418.465	141.559
YGL079W::chr7_1:up	398.949	454.206	858.063
YGL080W::chr7_1:up	647.061	836.557	1372.9
YGL081W::chr7_1:up	2759.56	3243.48	3421.8
YGL082W::chr7_1:up	1157.07	1422.93	1258.35
YGL083W::chr7_1:up	511.978	715.932	1105.9
YGL084C::chr7_1:up	500.557	477.661	944.741
YGL085W::chr7_1:up	385.952	494.786	513.531
YGL086W::chr7_1:up	359.172	419.954	272.664
YGL087C::chr7_1:up	5798.34	7097.15	10961.9
YGL088W::chr7_1:up	20.8729	22.338	0.435565
YGL089C::chr7_1:up	591.137	728.963	490.011
YGL090W::chr7_1:up	560.813	603.126	705.18
YGL094C::chr7_1:up	4461.3	5124.33	6804.83
YGL096W::chr7_1:up	822.709	994.413	553.168
YGL101W::chr7_2:up	276.074	403.573	255.677
YGL104C::chr7_2:up	23.6297	20.8488	11.3247
YGL105W::chr7_2:up	83.4918	57.7065	0.87113
YGL107C::chr7_2:up	0.393829	15.2643	254.37
YGL108C::chr7_2:up	374.531	372.672	260.468
YGL109W::chr7_2:up	266.228	260.238	130.67
YGL110C::chr7_2:up	237.085	198.436	287.037
YGL114W::chr7_2:up	444.239	364.481	390.702
YGL115W::chr7_2:up	868.787	991.062	272.664
YGL117W::chr7_2:up	118.543	104.244	270.486
YGL121C::chr7_2:up	640.76	658.971	692.113
YGL124C::chr7_2:up	80.3411	123.604	1.74226
YGL125W::chr7_2:up	248.9	272.523	170.741
YGL126W::chr7_2:up	513.553	587.861	474.33
YGL127C::chr7_2:up	87.8239	72.2261	119.345
YGL131C::chr7_2:up	523.399	628.07	246.094
YGL132W::chr7_2:up	40.1706	55.845	17.4226
YGL133W::chr7_2:up	102.789	218.912	270.05
YGL135W::chr7_2:up	286.314	110.201	0.435565
YGL136C::chr7_2:up	254.414	208.116	303.589
YGL138C::chr7_2:up	322.546	433.357	235.641
YGL139W::chr7_2:up	259.533	429.262	385.475
YGL140C::chr7_2:up	554.905	705.136	601.08
YGL141W::chr7_2:up	256.383	247.207	212.12
YGL143C::chr7_2:up	309.55	191.362	76.2239
YGL144C::chr7_2:up	231.178	241.623	86.6774
YGL146C::chr7_2:up	261.109	280.714	493.06
YGL147C::chr7_2:up	1563.5	1316.45	761.803
YGL148W::chr7_2:up	166.59	129.188	78.4017
YGL149W::chr7_2:up	151.23	159.717	151.141
YGL151W::chr7_2:up	217.787	262.471	24.8272
YGL152C::chr7_2:up	276.074	290.394	561.443
YGL153W::chr7_2:up	243.386	423.305	373.279
YGL154C::chr7_2:up	820.346	837.302	755.705
YGL156W::chr7_2:up	717.163	688.01	989.168
YGL157W::chr7_2:up	438.726	570.363	227.801
YGL158W::chr7_2:up	226.846	287.415	243.045
YGL159W::chr7_2:up	254.02	266.939	167.693
YGL160W::chr7_2:up	313.488	349.217	112.811
YGL161C::chr7_2:up	535.607	730.08	671.641
YGL162W::chr7_2:up	466.294	418.837	490.882
YGL163C::chr7_2:up	397.373	254.653	197.747
YGL164C::chr7_2:up	238.267	289.649	90.5975
YGL165C::chr7_2:up	485.591	525.687	561.879
YGL166W::chr7_2:up	562.782	712.954	818.862
YGL167C::chr7_2:up	291.827	234.921	577.124
YGL168W::chr7_2:up	744.731	523.453	4648.35
YGL170C::chr7_2:up	742.762	702.157	547.07
YGL175C::chr7_2:up	251.263	210.722	114.989
YGL176C::chr7_2:up	476.533	488.085	352.372
YGL177W::chr7_2:up	433.212	591.584	391.573
YGL179C::chr7_2:up	567.901	655.62	577.124
YGL180W::chr7_2:up	544.666	563.662	827.574
YGL181W::chr7_2:up	650.212	697.317	283.117
YGL194C::chr7_3:up	246.537	226.731	243.045
YGL195W::chr7_3:up	10.2396	10.4244	7.40461
YGL196W::chr7_3:up	28.7495	26.061	19.6004
YGL197W::chr7_3:up	10.2396	10.4244	7.40461
YGL198W::chr7_3:up	20.4791	12.6582	6.96904
YGL199C::chr7_3/chr00_12:up	61.8312	56.5896	39.6364
YGL200C::chr7_3:up	116.967	67.0139	53.1389
YGL202W::chr7_3:up	84.2794	53.2389	17.4226
YGL203C::chr7_3:up	70.4954	58.4511	109.762
YGL205W::chr7_3:up	314.669	251.302	368.052
YGL206C::chr7_3:up	7.87658	5.5845	0
YGL208W::chr7_3:up	84.6732	48.399	58.8013
YGL209W::chr7_3:up	279.619	185.778	129.363
YGL210W::chr7_3:up	817.589	561.8	611.969
YGL211W::chr7_3:up	84.2794	18.2427	0
YGL212W::chr7_3:up	24.4174	12.6582	0
YGL213C::chr7_3:up	184.706	60.6849	21.3427
YGL214W::chr7_3/chr00_12:up	73.646	41.6976	40.5075
YGL215W::chr7_3:up	276.468	131.794	268.308
YGL216W::chr7_3:up	586.805	411.019	500.029
YGL217C::chr7_3/chr00_12:up	338.693	270.29	314.478
YGL218W::chr7_3/chr00_12:up	116.573	43.5591	24.3916
YGL219C::chr00_14:up	36.6261	30.1563	26.5695
YGL220W::chr7_3:up	193.37	163.44	93.6465
YGL221C::chr7_3:up	68.1324	45.0483	37.023
YGL222C::chr7_3:up	244.568	196.574	178.582
YGL223C::chr7_3:up	51.5916	16.3812	32.6674
YGL224C::chr7_3:up	220.15	157.855	123.265
YGL226C-A::chr7_3:up	145.323	76.3214	61.8502
YGL227W::chr7_3:up	228.027	140.729	270.486
YGL228W::chr7_3:up	42.5335	29.784	16.5515
YGL229C::chr7_3:up	113.423	69.62	57.059
YGL230C::chr7_3:up	257.17	230.826	101.922
YGL231C::chr7_3:up	132.72	132.166	200.36
YGL232W::chr7_3:up	2094.38	1858.89	1682.59
YGL234W::chr7_3:up	5.90744	5.5845	26.5695
YGL235W::chr7_3/chr00_12:up	220.15	128.071	271.357
YGL236C::chr7_3:up	235.51	285.554	173.355
YGL237C::chr7_3:up	7.08892	4.0953	10.4536
YGL241W::chr7_3:up	64.588	31.2732	36.5875
YGL242C::chr7_3:up	230.784	239.016	182.502
YGL243W::chr7_3:up	180.768	117.647	155.497
YGL244W::chr7_3:up	7.87658	4.0953	1.3067
YGL248W::chr7_3:up	55.1361	51.0051	79.7084
YGL249W::chr7_3:up	77.5843	40.5807	79.7084
YGL250W::chr7_3:up	282.375	207.371	156.803
YGL251C::chr7_3:up	934.95	511.168	429.032
YGL252C::chr7_3:up	22.0544	13.7751	21.7783
YGL253W::chr7_3:up	286.708	235.666	285.731
YGL254W::chr7_3:up	265.441	287.788	400.72
YGL255W::chr7_3:up	147.686	67.0139	194.262
YGL256W::chr7_3:up	1865.96	1860.01	1440.41
YGL257C::chr7_3:up	200.065	185.033	311.865
YGL258W::chr7_3:up	165.802	104.989	194.698
YGL259W::chr7_3:up	2016.01	2055.84	2518.44
YGL260W::chr7_3:up	363.504	292.255	239.125
YGL261C::chr7_3:up	260.715	183.916	155.932
YGL262W::chr7_3:up	186.675	174.981	93.6465
YGL263W::chr7_3:up	320.577	188.384	186.422
YGR001C::chr7_3:up	111.847	80.4167	48.7833
YGR003W::chr7_3:up	192.976	204.393	174.226
YGR004W::chr7_3:up	243.78	160.461	108.891
YGR007W::chr7_3:up	359.172	333.953	143.736
YGR008C::chr7_3:up	342.631	389.426	278.762
YGR010W::chr7_3:up	26.3865	16.7535	18.7293
YGR011W::chr7_3/chr00_12:up	522.217	347.728	260.032
YGR012W::chr7_3:up	1125.17	1194.71	748.736
YGR014W::chr7_3:up	322.94	196.574	235.205
YGR015C::chr7_3:up	577.353	598.658	402.027
YGR017W::chr7_3:up	962.124	622.113	530.083
YGR018C::chr7_3/chr00_12:up	410.37	285.926	98.4377
YGR019W::chr7_3:up	321.364	201.042	170.306
YGR020C::chr7_3:up	33.0816	7.07369	0
YGR021W::chr7_3:up	307.187	365.598	815.378
YGR022C::chr7_3/chr00_12:up	723.464	488.83	408.124
YGR023W::chr7_3:up	275.286	236.783	152.883
YGR025W::chr7_3/chr00_12:up	678.174	553.982	503.949
YGR026W::chr7_3:up	383.196	268.428	193.826
YGR027C::chr7_4:up	476.533	477.288	501.771
YGR028W::chr00_14:up	727.008	684.659	846.303
YGR031W::chr7_4:up	1118.47	1150.03	1304.52
YGR032W::chr00_14:up	354.84	465.747	485.219
YGR033C::chr7_4:up	813.257	859.64	891.166
YGR034W::chr7_4:up	1576.5	1575.57	837.156
YGR035C::chr7_4:up	970.001	1216.3	864.597
YGR036C::chr7_4:up	110.272	23.8272	156.368
YGR037C::chr7_4:up	303.642	339.91	471.281
YGR038W::chr00_14:up	519.067	660.46	360.212
YGR039W::chr7_4:up	843.582	858.523	871.13
YGR040W::chr00_14:up	406.432	505.583	662.059
YGR041W::chr7_4:up	435.181	504.466	227.365
YGR042W::chr7_4:up	556.48	589.723	408.124
YGR043C::chr7_4:up	589.168	745.344	484.784
YGR044C::chr7_4:up	2516.17	2512.28	2549.8
YGR045C::chr7_4:up	1480.4	1693.22	1084.56
YGR049W::chr7_4:up	1055.86	1238.27	750.479
YGR050C::chr00_14:up	419.822	530.527	642.023
YGR051C::chr7_4:up	1052.7	1247.2	1074.97
YGR052W::chr7_4:up	1214.57	1376.76	2210.49
YGR053C::chr00_14:up	693.533	548.397	333.207
YGR054W::chr7_4:up	778.994	757.258	170.306
YGR055W::chr7_4:up	396.192	459.046	673.384
YGR056W::chr7_4:up	123.662	99.7763	37.023
YGR057C::chr7_4:up	1171.64	966.49	440.792
YGR058W::chr7_4:up	835.705	670.884	932.545
YGR059W::chr7_4:up	571.446	607.221	400.72
YGR061C::chr7_4:up	224.876	218.54	1021.84
YGR063C::chr00_14:up	326.09	493.669	52.2678
YGR064W::chr7_4:up	651.787	721.145	32.6674
YGR066C::chr7_4:up	994.024	1142.96	1124.63
YGR067C::chr7_4:up	785.295	830.601	630.263
YGR068C::chr7_4:up	357.597	422.56	316.656
YGR069W::chr7_4:up	528.125	637.749	561.008
YGR070W::chr7_4:up	63.0126	59.9403	45.2988
YGR071C::chr7_4:up	1378.01	1507.81	1224.81
YGR072W::chr7_4:up	882.965	645.568	289.215
YGR077C::chr7_4:up	1678.89	1897.98	1850.72
YGR078C::chr7_4:up	306.399	418.093	1.3067
YGR079W::chr7_4:up	2461.83	2594.93	1187.79
YGR080W::chr7_4:up	1225.6	1552.12	1417.33
YGR081C::chr7_4:up	461.961	383.841	231.721
YGR084C::chr7_4:up	563.569	589.35	485.655
YGR085C::chr7_4:up	784.114	999.997	245.223
YGR086C::chr00_14:up	499.375	395.382	513.967
YGR087C::chr7_4:up	414.308	557.333	460.392
YGR088W::chr7_4:up	1084.21	1172.37	1226.12
YGR089W::chr00_14:up	406.432	538.345	387.217
YGR092W::chr00_14:up	14.5717	5.2122	0
YGR093W::chr00_14:up	385.165	244.973	493.931
YGR096W::chr7_4:up	456.842	850.705	222.138
YGR097W::chr7_4:up	863.273	1155.99	788.808
YGR100W::chr7_4:up	2750.11	3135.14	2331.14
YGR101W::chr7_4:up	650.212	618.762	1200.42
YGR102C::chr7_4:up	461.961	409.53	735.234
YGR104C::chr7_4:up	161.076	47.2821	87.113
YGR105W::chr7_4:up	11.8149	0.744599	0.435565
YGR106C::chr00_14:up	353.658	488.085	574.51
YGR107W::chr7_4:up	1146.83	1705.51	1094.14
YGR108W::chr7_4:up	2194.81	2677.21	2570.27
YGR109C::chr7_4:up	680.143	742.738	778.355
YGR110W::chr00_14:up	106.728	145.197	136.332
YGR111W::chr7_4:up	872.331	1251.67	676.868
YGR112W::chr7_4:up	187.069	282.948	625.036
YGR117C::chr00_14:up	1580.83	1830.23	2543.7
YGR118W::chr7_4:up	582.473	223.752	153.754
YGR121C::chr7_4:up	50.0163	30.5286	27.8762
YGR122C-A::chr00_17a:up	96.8819	91.958	108.456
YGR122W::chr7_4:up	160.288	91.2134	0
YGR123C::chr7_5:up	247.718	125.093	84.064
YGR124W::chr7_5:up	415.883	417.72	351.937
YGR125W::chr7_5:up	381.62	354.057	280.504
YGR126W::chr7_5:up	247.718	284.809	794.035
YGR127W::chr7_5:up	356.809	464.258	275.277
YGR129W::chr7_5:up	511.584	677.213	493.931
YGR130C::chr7_5:up	198.884	194.713	319.705
YGR131W::chr7_5:up	324.909	237.9	147.221
YGR132C::chr7_5:up	246.931	200.297	107.585
YGR133W::chr7_5:up	350.508	249.069	248.708
YGR134W::chr00_8:up	686.05	844.003	253.063
YGR135W::chr7_5:up	581.685	432.612	431.209
YGR136W::chr7_5:up	176.829	139.612	73.1749
YGR137W::chr7_5:up	239.448	362.62	140.688
YGR138C::chr7_5:up	49.6225	294.489	283.553
YGR139W::chr7_5:up	589.168	709.603	459.521
YGR141W::chr7_5:up	354.446	477.288	358.906
YGR142W::chr7_5:up	160.682	91.5857	93.2109
YGR143W::chr7_5:up	557.662	577.065	674.69
YGR144W::chr7_5:up	130.357	72.5984	57.059
YGR146C::chr7_5:up	307.974	218.168	162.901
YGR148C::chr7_5:up	391.86	674.979	190.777
YGR149W::chr7_5:up	244.962	231.57	337.127
YGR150C::chr7_5:up	81.5226	52.4943	21.7783
YGR151C::chr7_5:up	766.785	987.339	475.201
YGR152C::chr7_5:up	135.083	113.179	73.1749
YGR153W::chr7_5:up	22.8421	14.892	3.48452
YGR154C::chr7_5:up	324.515	327.251	404.64
YGR155W::chr00_11:up	31.1125	29.784	0.435565
YGR157W::chr7_5:up	202.822	134.772	156.368
YGR159C::chr7_5:up	78.372	20.4765	14.8092
YGR160W::chr7_5:up	103.183	62.9187	0
YGR161C::chr7_5:up	415.49	412.88	123.265
YGR162W::chr00_17a:up	750.244	560.311	124.572
YGR163W::chr7_5:up	2.36297	10.4244	21.7783
YGR164W::chr7_5:up	211.092	217.051	54.0101
YGR165W::chr7_5:up	235.116	135.889	367.617
YGR166W::chr7_5:up	70.8892	52.4943	202.102
YGR168C::chr7_5:up	838.068	896.125	548.376
YGR169C::chr7_5:up	411.551	572.225	273.099
YGR170W::chr7_5:up	452.51	368.577	335.385
YGR171C::chr7_5:up	543.09	567.012	797.955
YGR173W::chr7_5:up	442.664	372.672	374.586
YGR174C::chr7_5:up	174.466	208.488	211.249
YGR176W::chr7_5:up	380.833	514.146	544.021
YGR177C::chr7_5:up	458.417	475.054	454.73
YGR178C::chr7_5:up	393.041	433.357	365.875
YGR180C::chr7_5:up	0	19.7319	0
YGR181W::chr7_5:up	435.969	470.587	267.437
YGR182C::chr7_5:up	721.101	716.305	910.331
YGR184C::chr7_5:up	256.777	327.251	151.141
YGR187C::chr7_5:up	641.547	316.455	586.706
YGR189C::chr7_5:up	343.025	433.729	252.192
YGR192C::chr7_5:up	923.135	1078.18	2175.65
YGR193C::chr7_5:up	152.412	75.2045	164.208
YGR194C::chr7_5:up	350.508	248.324	476.508
YGR196C::chr7_5:up	462.749	491.063	213.862
YGR197C::chr7_5:up	339.087	327.251	213.427
YGR199W::chr7_5:up	398.161	283.32	144.172
YGR200C::chr7_5:up	362.717	388.681	303.589
YGR201C::chr00_10:up	139.022	69.2477	90.162
YGR202C::chr7_5:up	906.201	955.321	452.988
YGR203W::chr7_5:up	164.621	133.656	29.1829
YGR204W::chr00_10:up	291.827	506.7	689.935
YGR205W::chr7_5:up	546.241	352.94	440.356
YGR206W::chr7_5:up	560.025	798.955	134.59
YGR207C::chr7_5:up	256.383	240.133	323.625
YGR208W::chr7_5:up	87.8239	93.0749	50.09
YGR209C::chr7_5:up	298.916	341.771	315.349
YGR210C::chr00_8:up	743.549	882.723	497.415
YGR212W::chr7_5:up	359.172	434.474	325.367
YGR213C::chr7_5:up	423.76	436.335	495.237
YGR214W::chr7_5:up	816.801	589.35	543.585
YGR215W::chr7_5:up	397.373	412.88	1033.16
YGR217W::chr7_5:up	109.091	90.4688	49.6544
YGR219W::chr00_2:up	53.5607	43.1868	80.5795
YGR220C::chr00_2:up	209.123	166.79	406.818
YGR221C::chr00_2:up	1511.91	1450.48	1446.95
YGR222W::chr00_2:up	472.201	468.353	590.626
YGR223C::chr00_2:up	126.419	163.812	167.693
YGR224W::chr00_2:up	1043.65	1185.03	798.391
YGR225W::chr00_2:up	984.179	1275.5	1111.56
YGR226C::chr00_2:up	569.871	502.232	531.825
YGR227W::chr00_2:up	1637.93	1718.54	2392.56
YGR228W::chr00_2:up	859.729	1018.24	2026.25
YGR229C::chr00_2:up	559.237	532.016	2516.69
YGR230W::chr00_2:up	10.6334	14.1474	8.7113
YGR231C::chr00_2:up	632.096	916.602	1027.06
YGR232W::chr00_2:up	910.139	537.601	638.538
YGR233C::chr00_2:up	2513.42	1855.91	0
YGR234W::chr00_2:up	1070.43	1217.42	1172.11
YGR235C::chr00_2:up	365.08	255.025	273.97
YGR236C::chr00_2:up	515.522	590.467	760.061
YGR237C::chr00_2:up	1061.76	904.316	162.901
YGR238C::chr00_14:up	283.951	354.429	110.634
YGR239C::chr00_14:up	29.5372	30.5286	4.79122
YGR240C::chr00_2:up	52.7731	13.0305	0
YGR241C::chr00_2:up	1032.62	1243.11	834.107
YGR242W::chr00_2:up	1370.92	1635.14	1175.59
YGR243W::chr00_2:up	824.284	1191.73	1286.66
YGR244C::chr00_2:up	24.4174	21.9657	38.7653
YGR247W::chr00_2:up	814.832	683.542	796.648
YGR248W::chr00_14:up	380.045	562.545	571.026
YGR249W::chr00_2:up	1624.94	1923.67	1677.8
YGR250C::chr00_14:up	391.86	250.93	1046.66
YGR252W::chr00_17a:up	35.8384	22.7103	73.6105
YGR254W::chr00_17a:up	502.92	492.553	413.787
YGR255C::chr00_17a:up	9.84573	0	0
YGR256W::chr00_3:up	206.366	154.132	80.144
YGR257C::chr00_17a:up	311.519	123.231	172.048
YGR258C::chr00_17a:up	559.237	608.71	285.731
YGR259C::chr00_3:up	745.125	914.74	594.111
YGR260W::chr00_3:up	213.455	140.357	192.52
YGR261C::chr00_3:up	150.049	227.103	207.765
YGR263C::chr00_3:up	180.768	122.859	164.208
YGR266W::chr00_3:up	363.898	421.443	87.113
YGR268C::chr00_3:up	136.659	180.938	101.922
YGR269W::chr00_3:up	458.023	402.456	327.98
YGR270W::chr00_3:up	1185.43	1357.03	445.147
YGR271W::chr00_17a:up	217.394	171.63	48.3477
YGR273C::chr00_17a:up	477.715	622.485	759.19
YGR275W::chr00_3:up	148.867	118.019	87.113
YGR276C::chr00_17a:up	238.267	211.839	174.226
YGR279C::chr00_3:up	2770.19	3420.32	1925.63
YGR281W::chr00_3:up	454.873	422.932	382.426
YGR282C::chr00_3:up	162.651	263.588	368.488
YGR283C::chr00_3:up	237.085	295.606	165.95
YGR284C::chr00_3:up	465.506	590.095	215.605
YGR285C::chr00_3:up	31.5063	18.2427	0
YGR286C::chr00_3:up	354.446	387.564	252.628
YGR287C::chr00_3:up	645.486	682.053	221.703
YGR288W::chr00_3:up	411.158	274.385	260.468
YGR289C::chr00_17a:up	569.083	635.143	216.04
YGR290W::chr00_3:up	60.6497	47.6544	94.9532
YGR291C::chr00_17a:up	302.067	272.896	330.594
YGR292W::chr00_17a:up	493.468	720.028	587.577
YGR295C::chr00_17b:up	507.646	456.439	347.145
YHL002W::chr00_10:up	340.268	196.202	228.672
YHL003C::chr8_1:up	838.462	1189.87	706.922
YHL005C::chr8_1:up	108.303	192.479	476.944
YHL006C::chr8_1:up	555.299	473.938	334.95
YHL007C::chr8_1:up	371.381	338.42	252.192
YHL008C::chr8_1:up	421.003	582.649	355.857
YHL009C::chr8_1:up	325.303	278.852	189.906
YHL010C::chr8_1:up	340.662	437.08	443.405
YHL011C::chr00_10:up	3.15063	1.1169	4.79122
YHL012W::chr8_1:up	424.942	379.746	289.651
YHL013C::chr8_1:up	291.827	261.727	194.262
YHL014C::chr8_1:up	309.943	325.018	238.69
YHL016C::chr8_1:up	265.441	197.691	188.6
YHL017W::chr8_1:up	114.998	502.605	171.177
YHL019C::chr8_1:up	265.835	465.747	324.932
YHL020C::chr8_1:up	595.469	614.667	507.433
YHL021C::chr8_1:up	308.762	423.305	601.951
YHL022C::chr8_1:up	485.591	390.17	264.824
YHL023C::chr8_1:up	117.361	157.483	179.888
YHL024W::chr00_8:up	1241.35	901.338	907.718
YHL026C::chr8_1:up	217.787	159.717	61.8502
YHL027W::chr8_1:up	187.069	111.318	0
YHL028W::chr8_1:up	222.12	182.799	180.759
YHL029C::chr8_1:up	237.085	149.664	44.8632
YHL030W::chr8_1:up	194.945	89.7242	177.711
YHL031C::chr8_1:up	619.493	355.919	357.599
YHL032C::chr8_1:up	292.615	218.54	296.184
YHL033C::chr8_1:up	3.93829	5.9568	9.58243
YHL034C::chr8_1:up	326.878	137.006	49.6544
YHL035C::chr8_1:up	251.263	409.53	237.383
YHL036W::chr8_1:up	359.566	486.968	523.114
YHL037C::chr8_1:up	327.272	411.019	221.267
YHL038C::chr8_1:up	665.965	365.971	1164.27
YHL039W::chr00_10:up	199.277	193.968	173.79
YHL040C::chr8_1:up	213.849	110.201	142.865
YHL041W::chr8_1:up	164.227	134.4	50.09
YHL042W::chr8_1:up	681.324	967.607	442.098
YHL043W::chr8_1:up	270.561	299.329	210.813
YHL044W::chr8_1:up	484.804	677.585	460.392
YHL045W::chr8_1:up	606.103	594.563	516.145
YHL046C::chr8_1:up	146.111	126.21	213.427
YHL047C::chr8_1:up	942.039	1142.59	1155.12
YHR001W-A::chr8_1:up	439.119	456.812	415.965
YHR003C::chr00_10:up	497.012	488.085	436.436
YHR004C::chr00_10:up	616.342	604.242	2272.34
YHR006W::chr00_10:up	599.408	724.868	448.196
YHR008C::chr00_10:up	857.366	740.876	1600.7
YHR009C::chr00_10:up	391.466	339.537	126.314
YHR010W::chr8_1:up	221.332	102.01	200.36
YHR011W::chr8_1:up	15.3593	8.19059	0
YHR012W::chr8_1:up	77.9781	139.24	204.716
YHR013C::chr8_1:up	303.642	199.18	187.293
YHR014W::chr8_1:up	61.8312	77.4383	77.9661
YHR015W::chr8_1:up	144.141	81.5336	60.5435
YHR016C::chr00_8:up	577.353	417.348	314.042
YHR017W::chr00_8:up	367.049	663.066	329.287
YHR018C::chr8_1:up	509.221	554.727	449.939
YHR021C::chr8_1:up	611.223	309.753	184.244
YHR021W-A::chr00_3:up	181.555	523.081	209.942
YHR022C::chr8_1:up	513.553	680.936	377.199
YHR025W::chr00_10:up	7.87658	0	0
YHR026W::chr00_10:up	8.27041	17.1258	40.072
YHR028C::chr8_1:up	176.435	120.253	114.118
YHR030C::chr8_1:up	29.5372	39.0915	0
YHR031C::chr8_1:up	847.914	711.092	1314.1
YHR032W::chr00_8:up	747.881	823.899	906.411
YHR033W::chr8_1:up	554.905	361.503	537.923
YHR034C::chr8_1:up	1300.03	1285.55	108.456
YHR035W::chr8_1:up	477.715	611.688	629.391
YHR037W::chr8_1:up	333.179	273.64	228.236
YHR038W::chr8_1:up	122.087	49.8882	168.128
YHR039C::chr8_1:up	93.7313	60.3126	64.8992
YHR041C::chr00_10:up	458.417	354.057	833.671
YHR043C::chr8_1:up	365.867	357.035	172.484
YHR044C::chr8_1:up	587.199	630.676	297.055
YHR045W::chr00_8:up	954.642	869.692	1044.92
YHR046C::chr8_2:up	344.6	527.176	453.859
YHR047C::chr8_2:up	436.756	502.977	570.59
YHR048W::chr8_2:up	226.452	274.385	201.231
YHR049C-A::chr8_2:up	395.011	473.565	327.109
YHR049W::chr8_2:up	325.303	481.384	591.497
YHR050W::chr8_2:up	2361.01	2316.08	1688.25
YHR051W::chr8_2:up	341.056	243.484	601.515
YHR057C::chr8_2:up	156.744	292.255	150.705
YHR059W::chr00_10:up	493.468	294.861	52.2678
YHR060W::chr8_2:up	9.05807	5.5845	22.6494
YHR061C::chr8_2:up	229.208	288.905	323.189
YHR064C::chr00_8:up	213.849	90.8411	0
YHR066W::chr8_2:up	252.838	120.997	19.6004
YHR067W::chr00_10:up	522.217	432.985	932.98
YHR073W::chr8_2:up	421.003	428.517	264.388
YHR075C::chr8_2:up	591.925	481.756	240.432
YHR076W::chr8_2:up	232.753	221.518	299.669
YHR077C::chr8_2:up	439.119	450.855	54.4456
YHR078W::chr8_2:up	567.508	762.098	199.924
YHR079C-B::chr00_3:up	35.8384	236.783	140.252
YHR079C::chr8_2:up	100.033	52.122	48.3477
YHR080C::chr8_2:up	94.1251	116.902	74.4816
YHR081W::chr8_2:up	388.709	119.881	23.9561
YHR082C::chr8_2:up	423.76	341.771	127.185
YHR086W::chr8_2:up	566.72	925.537	481.735
YHR087W::chr8_2:up	725.827	642.962	451.681
YHR091C::chr8_2:up	1585.56	1395.01	2866.45
YHR092C::chr8_2:up	1149.59	1297.09	886.375
YHR093W::chr8_2:up	488.742	526.06	412.916
YHR094C::chr8_2:up	9.05807	201.414	321.447
YHR095W::chr8_2:up	140.597	71.4815	142.43
YHR096C::chr8_2:up	249.688	331.719	289.215
YHR097C::chr8_2:up	399.736	471.704	68.8193
YHR100C::chr8_2:up	850.277	868.203	2585.95
YHR103W::chr8_2:up	684.869	752.79	605.435
YHR104W::chr8_2:up	241.417	340.282	405.075
YHR105W::chr8_2:up	220.938	318.689	224.752
YHR106W::chr8_2:up	325.303	691.733	257.419
YHR108W::chr8_2:up	291.433	406.179	93.2109
YHR109W::chr8_2:up	311.913	313.104	162.466
YHR110W::chr8_2:up	235.51	484.734	400.72
YHR111W::chr8_2:up	266.622	254.653	191.213
YHR112C::chr8_2:up	441.482	398.361	452.988
YHR113W::chr8_2:up	240.236	186.522	150.705
YHR114W::chr8_2:up	388.315	572.225	851.094
YHR116W::chr8_2:up	158.319	161.95	243.916
YHR117W::chr8_2:up	354.84	271.779	267.872
YHR121W::chr8_2:up	483.228	487.713	446.019
YHR123W::chr8_2:up	196.127	188.756	155.497
YHR124W::chr8_2:up	206.366	206.254	154.626
YHR125W::chr8_2:up	193.37	151.154	125.007
YHR126C::chr8_2:up	360.747	327.624	202.102
YHR127W::chr00_10:up	171.316	137.379	123.265
YHR129C::chr8_2:up	80.3411	111.318	372.408
YHR130C::chr8_2:up	270.954	252.419	430.338
YHR131C::chr00_10:up	243.78	246.835	306.202
YHR132C::chr8_2:up	170.134	225.986	316.22
YHR132W-A::chr00_17b:up	1083.03	1397.99	904.233
YHR133C::chr8_2:up	312.7	242.367	126.314
YHR134W::chr8_2:up	742.368	538.345	423.369
YHR135C::chr8_2:up	232.753	159.344	26.1339
YHR136C::chr8_2:up	708.498	723.751	118.474
YHR137W::chr8_2:up	508.039	465.002	497.851
YHR138C::chr8_2:up	185.1	107.222	116.731
YHR139C-A::chr8_2:up	452.51	495.159	472.152
YHR139C::chr8_2:up	244.568	162.323	149.399
YHR140W::chr00_8:up	248.112	258.004	183.373
YHR142W::chr8_3:up	254.02	187.639	144.172
YHR143W::chr8_3:up	92.5498	63.6633	6.96904
YHR146W::chr00_15:up	372.168	275.874	324.06
YHR147C::chr8_3:up	132.72	72.2261	128.056
YHR150W::chr8_3:up	104.759	53.2389	96.6954
YHR151C::chr8_3:up	103.577	40.2084	18.2937
YHR152W::chr8_3:up	174.072	160.833	205.587
YHR153C::chr8_3:up	118.936	63.6633	45.7343
YHR154W::chr8_3:up	169.346	86.0012	63.1569
YHR155W::chr8_3:up	236.297	146.686	131.541
YHR156C::chr8_3:up	15.3593	13.0305	20.4716
YHR157W::chr8_3:up	59.4682	50.2605	43.1209
YHR158C::chr8_3:up	421.397	241.995	253.499
YHR159W::chr8_3:up	142.566	116.902	49.6544
YHR160C::chr8_3:up	50.0163	26.061	40.5075
YHR161C::chr8_3:up	17.7223	12.2859	28.3117
YHR162W::chr00_8:up	143.748	61.4295	67.077
YHR163W::chr8_3:up	146.504	106.85	40.072
YHR167W::chr8_3:up	5.51361	2.2338	2.17783
YHR168W::chr00_8:up	400.524	281.459	675.561
YHR171W::chr00_15:up	151.624	166.79	173.355
YHR176W::chr8_3:up	35.0508	25.6887	18.2937
YHR177W::chr8_3:up	173.679	175.353	144.608
YHR179W::chr8_3:up	149.261	129.933	16.987
YHR180W::chr00_10:up	25.2051	21.5934	15.6803
YHR181W::chr00_8:up	198.884	148.548	161.159
YHR182W::chr8_3:up	100.82	104.616	57.4946
YHR183W::chr8_3:up	40.1706	21.5934	14.8092
YHR184W::chr8_3:up	399.736	327.996	231.721
YHR185C::chr00_10:up	70.1016	54.3558	36.5875
YHR189W::chr8_3:up	48.441	40.2084	56.1879
YHR191C::chr00_8:up	24.0236	8.93519	14.8092
YHR193C::chr00_8:up	164.621	93.8195	35.7163
YHR194W::chr00_10:up	105.94	46.9098	13.067
YHR195W::chr8_3:up	45.6842	36.8577	22.2138
YHR198C::chr8_3:up	229.602	257.259	237.383
YHR199C::chr8_3:up	111.06	68.8754	27.4406
YHR200W::chr8_3:up	80.3411	125.465	161.595
YHR202W::chr8_3:up	441.089	286.298	365.875
YHR203C::chr8_3:up	469.444	274.013	196.44
YHR204W::chr8_3:up	125.631	96.0533	61.8502
YHR206W::chr8_3:up	428.88	319.061	885.939
YHR207C::chr8_3:up	458.811	295.606	84.064
YHR209W::chr8_3:up	374.138	259.493	230.414
YHR210C::chr8_3:up	55.1361	37.6023	31.3607
YIL001W::chr9_1:up	1401.64	1711.09	1107.21
YIL002C::chr9_1:up	417.853	330.974	315.349
YIL005W::chr9_1:up	511.584	440.058	126.314
YIL006W::chr9_1:up	712.437	673.118	817.12
YIL007C::chr9_1:up	816.014	976.914	1418.2
YIL008W::chr9_1:up	672.66	607.965	348.888
YIL009C-A::chr00_3:up	1326.42	1484.73	1253.12
YIL009W::chr9_1:up	717.95	818.687	575.817
YIL010W::chr9_1:up	200.853	208.488	238.254
YIL011W::chr9_1:up	579.716	869.692	981.328
YIL012W::chr9_1:up	322.152	344.377	179.453
YIL013C::chr9_1:up	1038.92	804.54	798.826
YIL014W::chr9_1:up	317.82	510.423	392.444
YIL015C-A::chr9_1:up	364.292	288.16	517.016
YIL015W::chr9_1:up	931.012	1044.67	901.184
YIL016W::chr9_1:up	384.377	486.968	486.962
YIL017C::chr9_1:up	5901.13	6187.99	1756.63
YIL018W::chr9_1:up	1548.93	1563.29	1001.36
[truncated: 5,903 more rows]

## Sheet: flight
Strain tag	7 generations	14 generations	21 generations
YAL002W::chr1_1:up	385.275	733.117	513.421
YAL004W::chr1_1:up	256.059	583.522	427.658
YAL005C::chr1_1:up	852.346	2426.22	1769.74
YAL007C::chr1_1:up	2679.14	2420.28	2439.62
YAL008W::chr1_1:up	896.208	1346.36	1287.61
YAL009W::chr1_1:up	395.944	192.196	270.039
YAL010C::chr1_1:up	98.3932	17.8326	25.4972
YAL011W::chr1_1:up	1925.19	1394.9	967.735
YAL012W::chr00_12:up	141.07	249.656	126.327
YAL013W::chr1_1:up	177.819	129.782	147.188
YAL014C::chr1_1:up	3563.49	3401.07	3323.91
YAL015C::chr1_1:up	3816	3140.52	2831.35
YAL016W::chr00_12:up	14.2255	44.5815	12.7486
YAL017W::chr1_1:up	2890.15	3472.4	3094.43
YAL018C::chr1_1:up	2018.84	1783.26	2037.46
YAL019W::chr1_1:up	1095.37	1316.64	1190.26
YAL020C::chr1_1:up	2523.85	2270.68	1671.23
YAL021C::chr1_1:up	137.513	128.791	70.6968
YAL022C::chr1_1:up	1740.26	1810.01	2235.64
YAL023C::chr1_1:up	1626.45	1151.19	1014.09
YAL024C::chr00_17a:up	16.5964	39.628	46.3585
YAL026C::chr1_1:up	348.525	325.94	264.244
YAL027W::chr1_1:up	2046.1	1294.84	1234.3
YAL028W::chr1_1:up	2218	2462.88	2088.45
YAL029C::chr1_1:up	1074.03	1262.15	1222.71
YAL030W::chr1_1:up	987.489	1130.39	1026.84
YAL031C::chr1_1:up	1135.67	1545.49	1612.12
YAL034C::chr1_1:up	559.537	897.573	737.101
YAL035W::chr1_1:up	30.822	14.8605	24.3382
YAL036C::chr1_1:up	2680.33	2402.45	2431.51
YAL037W::chr1_1:up	496.708	636.029	910.945
YAL040C::chr1_1:up	40.3057	84.2094	57.9482
YAL042W::chr1_1:up	1336.01	1187.85	1204.16
YAL043C-A::chr1_1:up	373.42	509.219	427.658
YAL044C::chr1_1:up	347.34	514.173	441.565
YAL045C::chr1_1:up	675.712	813.364	857.633
YAL046C::chr1_1:up	1166.49	1328.53	1221.55
YAL047C::chr00_12:up	17.7819	36.6559	22.0203
YAL048C::chr1_1:up	327.187	607.299	425.34
YAL049C::chr1_1:up	1680.98	1948.71	1927.36
YAL051W::chr1_1:up	2156.35	1738.68	1980.67
YAL053W::chr1_1:up	472.999	858.936	926.012
YAL054C::chr00_12:up	399.5	340.801	278.151
YAL055W::chr1_1:up	686.382	776.708	802.003
YAL056W::chr1_1:up	352.082	574.605	653.656
YAL058C-A::chr00_12:up	1859.99	2093.35	2552.04
YAL058W::chr1_1:up	3765.02	3048.38	3332.02
YAL059W::chr1_1:up	150.553	343.773	224.839
YAL060W::chr1_1:up	1925.19	1448.4	1635.3
YAL061W::chr1_1:up	1474.71	1278.99	1185.62
YAL062W::chr1_1:up	1720.1	1498.93	1701.36
YAL064C-A::chr00_1:up	961.408	793.55	783.459
YAL065C::chr1_1:up	305.849	548.847	514.58
YAL066W::chr1_1:up	916.361	693.489	587.595
YAL067C::chr1_1:up	226.423	426.001	403.319
YAL068C::chr1_1:up	1850.5	2037.87	2178.85
YAR002C-A::chr00_16a:up	757.509	701.415	646.702
YAR002W::chr1_1:up	164.779	353.68	188.911
YAR003W::chr1_1:up	1459.3	1259.18	1038.43
YAR014C::chr1_1:up	887.91	852.001	773.029
YAR015W::chr1_1:up	176.634	138.698	56.7892
YAR018C::chr1_1:up	266.729	486.433	293.218
YAR020C::chr1_1:up	315.332	834.169	636.271
YAR023C::chr1_1:up	1868.29	1679.24	1445.23
YAR027W::chr1_1:up	656.745	810.392	883.13
YAR028W::chr1_1:up	1778.19	2319.23	2220.57
YAR029W::chr1_1:up	3670.19	3314.88	4035.51
YAR030C::chr1_1:up	2203.77	2131.98	2425.71
YAR031W::chr1_1:up	484.853	1052.12	953.827
YAR035W::chr1_1:up	1570.74	1742.64	2145.24
YAR037W::chr1_1:up	1852.87	2739.28	2137.13
YAR040C::chr1_1:up	3079.83	2448.02	3111.82
YAR042W::chr1_1:up	290.438	679.62	543.554
YAR043C::chr1_1:up	101.95	241.731	191.229
YAR044W::chr1_1:up	33.1929	80.2466	54.4713
YAR047C::chr1_1:up	3447.32	3964.78	4153.73
YAR050W::chr00_12:up	58.0876	186.251	208.613
YBL001C::chr2_1:up	303.478	327.921	236.429
YBL002W::chr2_1:up	188.488	208.047	229.475
YBL003C::chr2_1:up	14.2255	37.6466	25.4972
YBL005W::chr2_1:up	235.907	316.033	314.079
YBL006C::chr2_1:up	45.0475	51.5164	55.6303
YBL007C::chr2_1:up	97.2078	72.321	45.1996
YBL008W::chr2_1:up	141.07	163.465	137.917
YBL009W::chr2_1:up	152.924	217.954	158.778
YBL010C::chr2_1:up	648.447	684.573	747.532
YBL011W::chr2_1:up	109.062	420.056	325.669
YBL012C::chr2_1:up	100.764	224.889	224.839
YBL013W::chr2_1:up	431.508	521.108	534.282
YBL015W::chr2_1:up	381.718	427.982	440.406
YBL017C::chr2_1:up	133.957	106.996	151.824
YBL019W::chr2_1:up	26.0801	91.1443	68.3789
YBL021C::chr2_1:up	37.9347	107.986	63.743
YBL022C::chr2_1:up	28.4511	65.3861	90.3992
YBL024W::chr2_1:up	201.528	214.982	260.767
YBL027W::chr2_1:up	99.5787	158.512	74.1737
YBL028C::chr2_1:up	494.337	636.029	611.933
YBL029W::chr2_1:up	167.15	215.972	152.983
YBL031W::chr2_1:up	393.573	581.54	520.375
YBL032W::chr2_1:up	26.0801	50.5257	44.0406
YBL036C::chr2_1:up	211.012	228.851	216.726
YBL037W::chr2_1:up	841.677	1000.61	654.815
YBL038W::chr2_1:up	1.18546	9.90699	13.9076
YBL039C::chr2_1:up	137.513	206.065	69.5378
YBL042C::chr2_1:up	4.74184	10.8977	8.11275
YBL043W::chr2_1:up	316.518	524.08	423.022
YBL044W::chr2_1:up	360.38	702.406	615.41
YBL046W::chr2_1:up	75.8695	69.3489	89.2402
YBL047C::chr2_1:up	234.721	121.856	96.194
YBL048W::chr2_1:up	209.827	363.587	294.377
YBL049W::chr2_1:up	307.034	532.005	448.519
YBL051C::chr2_1:up	42.6766	99.0699	66.0609
YBL052C::chr2_1:up	49.7893	60.4326	75.3326
YBL053W::chr2_1:up	106.691	194.177	148.347
YBL054W::chr2_1:up	163.594	290.275	309.443
YBL055C::chr2_1:up	69.9422	122.847	110.102
YBL056W::chr2_1:up	64.0149	150.586	139.076
YBL057C::chr2_1:up	2094.71	2230.06	2290.11
YBL059W::chr2_1:up	69.9422	127.8	169.209
YBL060W::chr2_1:up	65.2003	125.819	104.307
YBL061C::chr2_1:up	299.922	310.089	259.608
YBL062W::chr2_1:up	437.435	595.41	557.462
YBL063W::chr2_1:up	491.966	511.201	598.025
YBL064C::chr2_1:up	32.0074	46.5629	54.4713
YBL065W::chr2_1:up	54.5312	122.847	95.035
YBL066C::chr2_1:up	237.092	192.196	245.7
YBL067C::chr2_1:up	202.714	318.014	200.501
YBL068W::chr2_1:up	142.255	142.661	212.09
YBL069W::chr2_1:up	82.9822	101.051	133.281
YBL070C::chr2_1:up	148.183	204.084	251.495
YBL071C::chr2_1:up	146.997	278.386	223.68
YBL072C::chr2_1:up	692.309	660.796	438.088
YBL075C::chr2_1:up	298.736	306.126	316.397
YBL078C::chr2_1:up	399.5	488.415	416.068
YBL079W::chr2_1:up	146.997	219.935	236.429
YBL080C::chr2_1:up	1.18546	12.8791	1.15896
YBL081W::chr2_1:up	24.8947	100.061	53.3123
YBL082C::chr2_1:up	220.496	241.731	197.024
YBL083C::chr2_1:up	56.9021	84.2094	60.2661
YBL085W::chr2_1:up	110.248	120.865	93.8761
YBL086C::chr2_1:up	322.445	345.754	309.443
YBL087C::chr2_1:up	1415.44	1789.2	1488.11
YBL088C::chr2_1:up	55.7166	80.2466	86.9223
YBL089W::chr2_1:up	1254.22	1491.99	1138.1
YBL091C-A::chr00_1:up	312.962	416.094	446.201
YBL091C::chr2_1:up	499.079	669.713	543.554
YBL093C::chr2_1:up	8.29822	13.8698	4.63585
YBL094C::chr2_1:up	1729.59	2088.39	2601.87
YBL095W::chr2_2:up	340.227	690.517	599.184
YBL096C::chr2_2:up	880.797	1283.95	1382.64
YBL098W::chr2_2:up	1452.19	1680.23	1914.61
YBL099W::chr2_2:up	253.689	306.126	184.275
YBL100C::chr2_2:up	430.322	428.973	223.68
YBL101C::chr2_2:up	5.9273	15.8512	22.0203
YBL102W::chr2_2:up	596.287	879.741	1088.27
YBL103C::chr2_2:up	1196.13	1423.63	1333.97
YBL104C::chr2_2:up	726.687	844.076	805.48
YBL106C::chr2_2:up	500.264	919.369	1002.5
YBL107C::chr2_2:up	347.34	801.476	607.297
YBR001C::chr2_2:up	693.494	1156.15	1260.95
YBR003W::chr2_2:up	569.021	698.443	540.077
YBR005W::chr2_2:up	346.154	701.415	762.598
YBR006W::chr2_2:up	3040.71	3416.92	3891.8
YBR007C::chr2_2:up	1194.94	1969.51	1480
YBR008C::chr2_2:up	379.347	909.462	778.824
YBR009C::chr2_2:up	512.119	987.727	876.177
YBR010W::chr2_2:up	1388.17	1607.9	1304.99
YBR012C::chr2_2:up	1122.63	1592.05	1378.01
YBR013C::chr2_2:up	688.753	1388.96	1237.77
YBR014C::chr2_2:up	1995.13	2412.35	2149.88
YBR015C::chr2_2:up	371.049	17.8326	457.791
YBR016W::chr2_2:up	3537.41	3019.65	3079.37
YBR017C::chr2_2:up	15.411	5.94419	23.1793
YBR018C::chr2_2:up	780.033	994.662	952.668
YBR019C::chr2_2:up	119.732	321.977	251.495
YBR020W::chr00_18:up	118.546	184.27	183.116
YBR020W::chr2_2:up	92.4659	179.317	155.301
YBR021W::chr2_2:up	451.66	690.517	637.43
YBR022W::chr2_2:up	571.392	700.424	731.306
YBR023C::chr2_2:up	354.453	747.978	523.852
YBR024W::chr2_2:up	310.591	572.624	555.144
YBR025C::chr2_2:up	385.275	479.498	266.562
YBR026C::chr2_2:up	307.034	392.317	239.905
YBR027C::chr2_2:up	298.736	503.275	496.036
YBR028C::chr2_2:up	519.232	658.815	622.364
YBR030W::chr2_2:up	360.38	592.438	537.759
YBR031W::chr2_2:up	229.979	341.791	271.198
YBR032W::chr2_2:up	354.453	484.452	467.062
YBR033W::chr2_2:up	1129.74	975.839	1286.45
YBR034C::chr2_2:up	138.699	291.266	296.695
YBR035C::chr2_2:up	92.4659	153.558	34.7689
YBR036C::chr2_2:up	110.248	268.479	154.142
YBR037C::chr2_2:up	155.295	446.805	322.192
YBR039W::chr2_2:up	220.496	555.782	368.55
YBR040W::chr2_2:up	367.493	376.466	368.55
YBR041W::chr2_2:up	84.1677	230.833	161.096
YBR042C::chr2_2:up	317.703	227.861	319.874
YBR043C::chr2_2:up	363.936	464.638	383.617
YBR045C::chr2_2:up	558.352	683.582	937.602
YBR046C::chr2_2:up	985.118	1161.1	1211.12
YBR047W::chr2_2:up	267.914	411.14	433.452
YBR048W::chr2_2:up	457.588	466.619	163.414
YBR050C::chr2_2:up	261.987	625.131	483.288
YBR051W::chr2_2:up	251.318	339.81	345.371
YBR052C::chr2_2:up	194.416	398.261	274.674
YBR053C::chr2_2:up	69.9422	160.493	187.752
YBR054W::chr2_2:up	601.028	710.331	773.029
YBR056W::chr2_2:up	251.318	286.312	221.362
YBR057C::chr2_2:up	180.19	272.442	168.05
YBR058C::chr2_2:up	235.907	447.796	375.504
YBR059C::chr2_2:up	796.629	850.02	844.885
YBR061C::chr2_2:up	131.586	145.633	70.6968
YBR062C::chr2_2:up	374.606	486.433	533.123
YBR063C::chr2_2:up	496.708	558.754	507.626
YBR064W::chr2_2:up	1001.71	1213.61	1200.69
YBR065C::chr2_2:up	860.644	1155.16	1142.74
YBR066C::chr2_2:up	982.747	1077.88	1008.3
YBR067C::chr2_2:up	139.884	268.479	278.151
YBR068C::chr2_2:up	259.616	395.289	380.14
YBR069C::chr2_2:up	114.99	241.731	248.018
YBR071W::chr2_2:up	120.917	290.275	293.218
YBR072W::chr2_2:up	610.512	649.899	829.818
YBR073W::chr2_2:up	222.867	600.364	373.186
YBR074W::chr2_2:up	470.628	779.68	745.214
YBR075W::chr00_18:up	9.48368	11.8884	25.4972
YBR075W::chr2_2:up	182.561	297.21	227.157
YBR076W::chr2_2:up	233.536	415.103	373.186
YBR077C::chr2_2:up	341.413	229.842	200.501
YBR078W::chr2_2:up	733.8	766.801	675.676
YBR081C::chr2_3:up	21.3383	18.8233	25.4972
YBR082C::chr2_3:up	103.135	163.465	89.2402
YBR083W::chr00_16a:up	106.691	153.558	154.142
YBR084C-A::chr00_16a:up	1097.74	1108.59	748.691
YBR084W::chr2_3:up	1010.01	1083.82	1226.18
YBR085W::chr2_3:up	534.643	603.336	905.151
YBR086C::chr2_3:up	34.3784	49.535	52.1534
YBR090C-A::chr2_3:up	437.435	545.875	538.918
YBR090C::chr00_16a:up	111.433	228.851	170.368
YBR092C::chr2_3:up	553.61	426.991	576.005
YBR093C::chr2_3:up	525.159	528.043	485.606
YBR094W::chr2_3:up	408.984	602.345	534.282
YBR095C::chr2_3:up	117.361	168.419	142.553
YBR098W::chr2_3:up	30.822	98.0792	45.1996
YBR099C::chr2_3:up	452.846	672.685	545.872
YBR100W::chr2_3/chr00_16a:up	424.395	685.564	426.499
YBR101C::chr2_3:up	231.165	315.042	216.726
YBR103W::chr2_3:up	299.922	216.963	100.83
YBR104W::chr2_3:up	456.402	549.838	595.707
YBR105C::chr2_3:up	467.071	355.661	464.744
YBR106W::chr2_3:up	307.034	345.754	194.706
YBR107C::chr2_3:up	92.4659	80.2466	113.578
YBR112C::chr00_16a:up	26.0801	33.6838	27.8151
YBR113W::chr2_3:up	4.74184	20.8047	18.5434
YBR115C::chr2_3:up	67.5712	157.521	125.168
YBR116C::chr2_3:up	189.674	154.549	227.157
YBR119W::chr2_3:up	180.19	164.456	279.31
YBR120C::chr2_3:up	135.142	211.019	166.891
YBR125C::chr00_16a:up	601.028	496.34	551.667
YBR128C::chr2_3:up	50.9748	107.986	92.7171
YBR129C::chr2_3:up	54.5312	106.996	49.8354
YBR130C::chr2_3:up	177.819	262.535	232.952
YBR131W::chr00_16a:up	124.473	122.847	186.593
YBR133C::chr2_3:up	2.37092	16.8419	6.95378
YBR134W::chr2_3:up	1613.41	1759.48	1816.1
YBR137W::chr2_3:up	144.626	100.061	113.578
YBR138C::chr2_3:up	436.249	637.02	336.099
YBR139W::chr2_3:up	656.745	556.773	478.652
YBR141C::chr2_3:up	641.334	685.564	827.5
YBR144C::chr2_3:up	762.251	896.583	950.35
YBR145W::chr2_3:up	271.47	357.642	366.233
YBR146W::chr2_3:up	14.2255	27.7396	24.3382
YBR147W::chr2_3:up	459.959	583.522	693.06
YBR148W::chr2_3:up	729.058	1115.53	822.864
YBR149W::chr2_3:up	11.8546	16.8419	13.9076
YBR150C::chr00_16a:up	1.18546	384.391	1.15896
YBR151W::chr2_3:up	580.876	381.419	334.941
YBR157C::chr2_3:up	112.619	238.758	121.691
YBR158W::chr2_3:up	686.382	541.912	555.144
YBR159W::chr2_3:up	13.0401	8.91629	9.27171
YBR161W::chr2_3:up	348.525	531.015	418.386
YBR162W-A::chr2_3:up	209.827	399.252	431.135
YBR163W::chr2_3:up	465.886	469.591	259.608
YBR164C::chr2_3:up	84.1677	158.512	119.373
YBR165W::chr2_3:up	271.47	249.656	147.188
YBR168W::chr00_16a:up	5.9273	0	18.5434
YBR169C::chr00_16a:up	299.922	457.703	389.412
YBR170C::chr2_3:up	701.793	424.019	515.739
YBR171W::chr2_3:up	16.5964	27.7396	22.0203
YBR172C::chr2_3:up	1299.26	1901.15	1943.58
YBR173C::chr2_4:up	311.776	465.629	142.553
YBR174C::chr2_4:up	1085.88	904.508	1147.37
YBR175W::chr2_4:up	964.965	1274.04	1270.22
YBR176W::chr2_4:up	251.318	551.819	432.293
YBR177C::chr2_4:up	253.689	499.312	367.392
YBR178W::chr2_4:up	371.049	496.34	494.878
YBR179C::chr2_4:up	8.29822	11.8884	11.5896
YBR180W::chr2_4:up	625.923	852.992	768.393
YBR181C::chr2_4:up	507.377	584.512	268.88
YBR182C::chr2_4:up	334.3	326.931	367.392
YBR183W::chr2_4:up	80.6113	224.889	154.142
YBR184W::chr2_4:up	2962.47	3083.06	2876.55
YBR185C::chr2_4:up	61.6439	135.726	137.917
YBR186W::chr2_4:up	78.2404	195.168	155.301
YBR188C::chr2_4:up	335.485	367.549	259.608
YBR189W::chr00_14:up	145.812	138.698	68.3789
YBR191W::chr00_11:up	16.5964	3.9628	15.0665
YBR194W::chr2_4:up	118.546	129.782	42.8817
YBR195C::chr2_4:up	109.062	161.484	164.573
YBR197C::chr2_4:up	74.684	192.196	171.527
YBR199W::chr2_4:up	963.779	1303.76	1198.37
YBR203W::chr2_4:up	821.524	735.099	1197.21
YBR204C::chr2_4:up	443.362	551.819	659.45
YBR205W::chr2_4:up	1113.15	1154.16	1094.06
YBR206W::chr2_4:up	944.812	921.35	931.807
YBR207W::chr2_4:up	1256.59	1247.29	1205.32
YBR208C::chr2_4:up	256.059	346.745	295.536
YBR210W::chr2_4:up	254.874	603.336	434.611
YBR212W::chr2_4:up	1524.5	1773.35	1890.27
YBR214W::chr2_4:up	1180.72	1438.5	1559.97
YBR216C::chr2_4:up	3842.08	4562.17	4511.85
YBR217W::chr2_4:up	225.237	683.582	477.493
YBR218C::chr2_4:up	277.398	717.266	731.306
YBR219C::chr2_4:up	243.019	558.754	456.632
YBR220C::chr2_4:up	1778.19	2293.47	1871.73
YBR221C::chr2_4:up	414.911	672.685	611.933
YBR222C::chr2_4:up	1345.5	1119.49	1353.67
YBR223C::chr2_4:up	763.437	990.699	1069.72
YBR224W::chr2_4:up	2245.26	2266.72	1862.45
YBR225W::chr2_4:up	660.301	1215.59	783.459
YBR226C::chr2_4:up	486.039	494.359	464.744
YBR227C::chr2_4:up	489.595	503.275	711.604
YBR228W::chr2_4:up	52.1603	171.391	155.301
YBR229C::chr2_4:up	188.488	284.331	338.417
YBR230C::chr2_4:up	548.868	1055.09	1321.22
YBR231C::chr2_4:up	107.877	197.149	114.737
YBR232C::chr00_8:up	439.806	608.289	587.595
YBR233W::chr2_4:up	105.506	143.651	147.188
YBR235W::chr2_4:up	171.892	183.279	238.747
YBR238C::chr2_4:up	74.684	175.354	104.307
YBR239C::chr2_4:up	432.693	398.261	491.401
YBR240C::chr2_4:up	527.53	614.233	601.502
YBR241C::chr2_4:up	947.183	763.829	828.659
YBR242W::chr2_4:up	587.988	641.973	675.676
YBR244W::chr2_4:up	181.375	222.907	296.695
YBR245C::chr2_4:up	260.801	245.693	259.608
YBR246W::chr2_4:up	227.608	216.963	241.064
YBR248C::chr2_4:up	407.798	407.177	478.652
YBR249C::chr2_4:up	192.045	194.177	197.024
YBR250W::chr2_4:up	231.165	336.838	397.525
YBR251W::chr2_4:up	340.227	409.159	234.111
YBR255W::chr2_4:up	90.095	106.996	92.7171
YBR258C::chr2_4:up	188.488	247.675	296.695
YBR259W::chr2_4:up	560.723	557.764	651.338
YBR260C::chr2_4:up	206.27	310.089	318.715
YBR261C::chr2_4:up	124.473	195.168	108.943
YBR262C::chr2_4:up	267.914	377.456	467.062
YBR263W::chr2_4:up	270.285	291.266	358.12
YBR264C::chr2_4:up	229.979	768.783	905.151
YBR266C::chr2_4:up	79.4259	71.3303	28.9741
YBR267W::chr2_4:up	312.962	224.889	184.275
YBR268W::chr2_4:up	571.392	604.326	406.796
YBR269C::chr00_1:up	471.813	432.936	485.606
YBR270C::chr00_16a:up	1085.88	1037.26	1352.51
YBR271W::chr00_1:up	494.337	489.405	425.34
YBR272C::chr00_16a:up	1161.75	917.387	985.119
YBR273C::chr00_1:up	16.5964	101.051	49.8354
YBR275C::chr00_16a:up	88.9095	219.935	119.373
YBR276C::chr00_16a:up	98.3932	113.93	125.168
YBR277C::chr00_1:up	2515.55	1796.14	2005.01
YBR278W::chr00_1:up	991.045	1165.06	1171.71
YBR280C::chr00_16a:up	1052.69	1373.11	1499.7
YBR281C::chr00_1:up	521.603	426.991	420.704
YBR282W::chr00_1:up	78.2404	104.023	57.9482
YBR283C::chr00_1:up	86.5386	129.782	74.1737
YBR284W::chr00_1:up	1028.98	1330.51	1007.14
YBR285W::chr00_1:up	679.269	1096.7	934.125
YBR286W::chr00_1:up	219.31	325.94	405.637
YBR287W::chr00_16a:up	443.362	265.507	278.151
YBR288C::chr00_16a:up	258.43	128.791	114.737
YBR289W::chr00_16a:up	87.7241	67.3675	53.3123
YBR290W::chr00_1:up	395.944	314.052	311.761
YBR291C::chr00_1:up	192.045	129.782	141.394
YBR292C::chr00_1:up	647.261	629.094	682.63
YBR293W::chr00_1:up	316.518	254.61	259.608
YBR294W::chr00_16a:up	642.52	503.275	540.077
YBR295W::chr00_1:up	235.907	259.563	259.608
YBR296C::chr00_1:up	417.282	366.559	475.175
YBR297W::chr00_1:up	451.66	367.549	348.848
YBR298C::chr00_1:up	158.852	176.344	222.521
YBR299W::chr00_17a:up	34.3784	88.1722	95.035
YBR300C::chr00_1:up	474.184	380.428	353.484
YBR301W::chr00_16a:up	823.895	639.992	856.474
YCL001W-A::chr00_1:up	285.696	241.731	241.064
YCL001W::chr3_1:up	514.49	542.903	474.016
YCL002C::chr3_1:up	310.591	291.266	263.085
YCL005W::chr3_1:up	165.964	112.94	122.85
YCL006C::chr3_1/chr00_12:up	2711.15	1982.39	2181.17
YCL007C::chr3_1:up	30.822	10.8977	13.9076
YCL008C::chr3_1:up	738.542	537.95	397.525
YCL009C::chr3_1:up	820.339	606.308	679.153
YCL010C::chr3_1:up	2949.43	2293.47	2272.73
YCL011C::chr3_1:up	483.668	495.35	351.166
YCL012W::chr3_1:up	886.724	631.075	726.67
YCL013W::chr3_1:up	928.216	813.364	881.971
YCL014W::chr3_1:up	591.545	564.699	540.077
YCL016C::chr3_1:up	58.0876	51.5164	25.4972
YCL022C::chr00_12:up	261.987	190.214	178.48
YCL023C::chr3_1/chr00_12:up	1676.24	1312.68	1636.46
YCL024W::chr3_1:up	168.335	191.205	185.434
YCL025C::chr3_1:up	233.536	112.94	250.336
YCL026C-A::chr00_16a:up	546.497	438.88	781.142
YCL026C::chr3_1:up	401.871	287.303	378.981
YCL027W::chr3_1:up	430.322	331.884	312.92
YCL028W::chr3_1:up	417.282	283.34	25.4972
YCL029C::chr3_1:up	73.4985	68.3582	84.6044
YCL030C::chr3_1:up	17.7819	12.8791	19.7024
YCL033C::chr3_1:up	395.944	323.959	419.545
YCL035C::chr00_11:up	267.914	457.703	390.571
YCL036W::chr3_1:up	404.242	422.038	474.016
YCL037C::chr3_1:up	1222.21	1018.44	793.89
YCL038C::chr00_12:up	499.079	394.298	361.597
YCL039W::chr3_1:up	291.623	386.373	355.802
YCL040W::chr3_1:up	27.2656	3.9628	11.5896
YCL042W::chr3_1:up	14.2255	13.8698	13.9076
YCL044C::chr3_1:up	529.901	396.28	577.164
YCL045C::chr3_1:up	401.871	469.591	514.58
YCL046W::chr3_1:up	197.972	176.344	203.978
YCL047C::chr3_1:up	350.896	435.908	369.709
YCL048W::chr3_1:up	228.794	193.186	220.203
YCL049C::chr3_1:up	595.101	451.759	620.046
YCL050C::chr3_1:up	1320.6	1249.27	1282.97
YCL051W::chr3_1:up	507.377	469.591	471.698
YCL055W::chr3_1:up	207.456	242.721	289.741
YCL056C::chr3_1:up	745.655	623.15	668.722
YCL057W::chr3_1:up	369.864	238.758	297.854
YCL058C::chr00_12:up	275.027	216.963	99.6709
YCL060C::chr3_1:up	516.861	305.135	350.007
YCL061C::chr3_1:up	29.6365	11.8884	8.11275
YCL062W::chr3_1:up	169.521	213.991	114.737
YCL063W::chr3_1:up	195.601	156.53	143.712
YCL064C::chr3_1:up	603.399	482.47	387.094
YCL069W::chr3_1:up	611.698	587.485	662.927
YCL074W::chr00_12:up	836.935	553.801	829.818
YCL075W::chr00_12:up	884.354	903.518	987.437
YCL076W::chr00_12:up	1004.09	689.527	810.116
YCR001W::chr3_1:up	272.656	267.489	154.142
YCR002C::chr3_1:up	885.539	672.685	630.476
YCR003W::chr3_1:up	155.295	106.996	157.619
YCR004C::chr3_1:up	237.092	148.605	129.804
YCR005C::chr3_1:up	606.956	420.056	762.598
YCR006C::chr3_1:up	34.3784	3.9628	9.27171
YCR007C::chr3_1:up	13.0401	1.9814	9.27171
YCR008W::chr3_1:up	292.809	128.791	198.183
YCR009C::chr3_1:up	80.6113	48.5443	34.7689
YCR010C::chr3_1:up	2204.96	2281.58	2492.93
YCR011C::chr3_1:up	85.3532	70.3396	70.6968
YCR014C::chr3_1:up	299.922	210.028	227.157
YCR015C::chr3_1:up	1154.64	655.843	934.125
YCR016W::chr3_1:up	827.451	631.075	628.158
YCR017C::chr3_1:up	430.322	356.652	525.011
YCR019W::chr3_1:up	655.56	671.694	680.312
YCR020C-A::chr3_1:up	187.303	196.158	144.87
YCR020C::chr3_1:up	666.229	683.582	578.323
YCR020W-B::chr00_1:up	35.5638	27.7396	11.5896
YCR021C::chr3_1:up	846.419	595.41	625.84
YCR022C::chr3_1:up	689.938	577.578	553.985
YCR023C::chr3_1:up	491.966	511.201	573.687
YCR024C-A::chr00_1:up	310.591	356.652	394.048
YCR024C::chr00_1:up	196.786	315.042	267.721
YCR025C::chr00_1:up	246.576	285.321	341.894
YCR027C::chr00_1:up	400.686	291.266	355.802
YCR028C-A::chr00_16a:up	182.561	297.21	228.316
YCR028C::chr00_1:up	92.4659	141.67	63.743
YCR030C::chr00_16a:up	637.778	513.182	508.785
YCR031C::chr00_1:up	374.606	446.805	279.31
YCR032W::chr00_16a:up	476.555	359.624	390.571
YCR033W::chr00_16a:up	488.41	565.689	300.172
YCR034W::chr00_1:up	49.7893	123.837	78.8095
YCR036W::chr00_1:up	360.38	341.791	486.765
YCR037C::chr00_1:up	146.997	259.563	287.423
YCR043C::chr00_1:up	1613.41	1592.05	1835.8
YCR045C::chr00_1:up	616.439	347.735	492.56
YCR046C::chr00_16a:up	395.944	410.149	295.536
YCR047C::chr00_16a:up	5.9273	29.721	13.9076
YCR048W::chr00_16a:up	165.964	304.145	286.264
YCR049C::chr00_1:up	142.255	352.689	270.039
YCR050C::chr00_1:up	94.8368	191.205	173.845
YCR051W::chr00_1:up	298.736	497.331	383.617
YCR053W::chr00_16a:up	29.6365	15.8512	22.0203
YCR059C::chr00_1:up	62.8294	211.019	164.573
YCR060W::chr00_16a:up	753.953	1334.47	1048.86
YCR061W::chr00_1:up	324.816	396.28	318.715
YCR062W::chr00_16a:up	486.039	441.852	405.637
YCR063W::chr00_1:up	32.0074	39.628	20.8613
YCR064C::chr00_16a:up	4.74184	1.9814	19.7024
YCR065W::chr00_1:up	515.675	823.271	587.595
YCR066W::chr00_1:up	1667.94	1219.55	1033.8
YCR067C::chr00_16a:up	1959.57	1940.78	1821.89
YCR068W::chr00_1:up	160.037	252.628	215.567
YCR069W::chr00_16a:up	1359.72	1422.64	1301.52
YCR071C::chr00_1:up	78.2404	58.4512	30.1331
YCR073C::chr00_16a:up	1543.47	1224.5	1350.19
YCR073W-A::chr00_1:up	17.7819	16.8419	13.9076
YCR075C::chr00_16a:up	998.158	931.257	1127.67
YCR076C::chr00_1:up	732.615	877.759	1077.84
YCR077C::chr00_1:up	94.8368	71.3303	85.7633
YCR079W::chr00_1:up	784.775	479.498	555.144
YCR081W::chr00_1:up	398.315	321.977	177.321
YCR082W::chr00_1:up	384.089	413.122	463.585
YCR083W::chr00_16a:up	433.879	677.638	520.375
YCR084C::chr00_16a:up	13.0401	38.6373	17.3845
YCR085W::chr00_1:up	682.825	685.564	741.737
YCR086W::chr00_1:up	615.254	647.917	482.129
YCR087C-A::chr00_1:up	64.0149	75.2931	69.5378
YCR087W::chr00_1:up	175.448	198.14	163.414
YCR088W::chr00_16a:up	272.656	351.698	390.571
YCR089W::chr00_16a:up	263.172	148.605	188.911
YCR090C::chr00_2:up	1050.32	873.797	977.006
YCR091W::chr00_2:up	371.049	430.954	521.534
YCR092C::chr00_2:up	1089.44	991.69	835.613
YCR094W::chr00_2:up	346.154	283.34	283.946
YCR095C::chr00_14:up	506.192	367.549	412.591
YCR098C::chr00_2:up	270.285	446.805	358.12
YCR099C::chr00_2:up	339.042	414.112	560.938
YCR100C::chr00_2:up	852.346	1119.49	1046.54
YCR101C::chr00_2:up	406.613	266.498	347.689
YCR102C::chr00_2:up	316.518	366.559	407.955
YCR102W-A::chr00_14:up	373.42	565.689	531.964
YCR105W::chr00_2:up	761.066	681.601	741.737
YCR106W::chr00_2:up	1349.05	1048.16	1184.46
YCR107W::chr00_17a:up	62.8294	94.1164	76.4916
YDL001W::chr4_1:up	69.9422	60.4326	63.743
YDL002C::chr4_1:up	152.924	113.93	78.8095
YDL006W::chr4_1:up	323.631	275.414	227.157
YDL009C::chr4_1:up	708.905	480.489	401.001
YDL010W::chr4_1:up	272.656	261.545	259.608
YDL011C::chr4_1:up	452.846	588.475	649.02
YDL012C::chr4_1:up	660.301	580.55	581.8
YDL013W::chr4_1:up	45.0475	29.721	27.8151
YDL018C::chr4_1:up	673.342	688.536	636.271
YDL019C::chr4_1:up	128.03	119.875	130.963
YDL020C::chr4_1:up	870.128	794.541	462.427
YDL021W::chr4_1:up	490.781	488.415	494.878
YDL022W::chr4_1:up	352.082	267.489	237.588
YDL023C::chr4_1:up	10024.3	10705.5	13364
YDL024C::chr4_1:up	748.026	666.741	638.589
YDL025C::chr4_1:up	355.638	243.712	252.654
YDL026W::chr4_1:up	561.908	480.489	464.744
YDL027C::chr4_1:up	376.976	317.024	300.172
YDL032W::chr4_1:up	391.202	526.061	387.094
YDL033C::chr4_1:up	833.379	330.894	514.58
YDL034W::chr4_1:up	225.237	176.344	162.255
YDL035C::chr4_1:up	7.11276	21.7954	20.8613
YDL036C::chr4_1:up	783.589	689.527	629.317
YDL037C::chr4_1:up	569.021	571.633	572.528
YDL038C::chr4_1:up	175.448	219.935	207.455
YDL039C::chr4_1:up	878.426	653.861	704.65
YDL040C::chr4_1:up	544.126	307.117	366.233
YDL041W::chr4_1:up	152.924	71.3303	25.4972
YDL044C::chr4_1:up	641.334	444.824	337.258
YDL046W::chr4_1:up	261.987	271.452	194.706
YDL047W::chr4_1:up	136.328	86.1908	39.4048
YDL048C::chr4_1:up	2878.3	2307.34	2208.98
YDL049C::chr4_1:up	506.192	335.847	486.765
YDL050C::chr4_1:up	337.856	244.703	394.048
YDL051W::chr4_1:up	609.327	590.457	623.522
YDL052C::chr4_1:up	662.672	533.987	448.519
YDL053C::chr4_1:up	219.31	212.01	232.952
YDL054C::chr4_1:up	484.853	427.982	600.343
YDL056W::chr4_1:up	276.212	179.317	128.645
YDL057W::chr4_1:up	393.573	387.363	556.303
YDL059C::chr4_1:up	258.43	231.824	249.177
YDL061C::chr4_1:up	770.549	819.308	786.936
YDL062W::chr4_1:up	627.109	682.592	492.56
YDL063C::chr4_1:up	2667.29	2756.12	2174.22
YDL065C::chr4_1:up	114.99	115.912	89.2402
YDL066W::chr4_1:up	141.07	123.837	125.168
YDL067C::chr4_1:up	68.7567	94.1164	74.1737
YDL068W::chr4_1:up	612.883	831.197	797.367
YDL069C::chr4_1:up	1173.61	1096.7	1104.49
YDL070W::chr4_1:up	361.565	377.456	353.484
YDL071C::chr4_1:up	697.051	585.503	647.861
YDL072C::chr4_1:up	1602.74	1481.1	1583.14
YDL073W::chr4_1:up	494.337	421.047	299.013
YDL074C::chr4_1:up	461.144	477.517	414.909
YDL075W::chr4_1:up	43.862	5.94419	13.9076
YDL076C::chr4_1:up	1254.22	1043.21	1120.72
YDL077C::chr4_1:up	67.5712	98.0792	55.6303
YDL078C::chr4_1:up	5217.21	4085.64	6694.17
YDL079C::chr4_1:up	1340.76	1317.63	1249.36
YDL080C::chr4_1:up	374.606	414.112	409.114
YDL081C::chr4_1:up	731.429	478.508	155.301
YDL082W::chr4_1:up	1780.56	1074.91	451.996
YDL083C::chr4_1:up	590.359	322.968	207.455
YDL085W::chr4_1:up	270.285	268.479	331.464
YDL086W::chr4_1:up	701.793	543.894	677.994
YDL088C::chr4_1:up	355.638	392.317	412.591
YDL089W::chr4_1:up	714.833	741.043	866.905
YDL090C::chr4_1:up	454.031	298.2	141.394
YDL091C::chr4_1:up	451.66	378.447	366.233
YDL093W::chr4_1:up	776.477	350.707	501.831
YDL094C::chr4_1:up	724.316	656.834	741.737
YDL095W::chr4_1:up	456.402	508.229	723.193
YDL096C::chr4_2:up	614.069	577.578	647.861
YDL099W::chr4_2:up	193.23	218.945	266.562
YDL100C::chr4_2:up	308.22	212.01	214.408
YDL101C::chr4_2:up	331.929	209.038	309.443
YDL104C::chr4_2:up	192.045	274.424	232.952
YDL106C::chr4_2:up	123.288	136.716	85.7633
YDL107W::chr4_2:up	16.5964	11.8884	41.7227
YDL109C::chr4_2:up	1305.19	991.69	1170.55
YDL110C::chr4_2:up	570.206	507.238	593.389
YDL112W::chr4_2:up	577.319	474.545	490.242
YDL113C::chr4_2:up	406.613	308.107	354.643
YDL114W::chr4_2:up	457.588	365.568	469.38
YDL115C::chr4_2:up	42.6766	32.6931	18.5434
YDL116W::chr4_2:up	49.7893	28.7303	20.8613
YDL117W::chr4_2:up	177.819	131.763	106.625
YDL118W::chr4_2:up	1979.72	1982.39	1485.79
YDL119C::chr4_2:up	1085.88	1029.34	1044.23
YDL121C::chr4_2:up	533.457	459.684	543.554
YDL122W::chr4_2:up	315.332	278.386	219.044
YDL123W::chr4_2:up	46.233	22.7861	28.9741
YDL124W::chr4_2:up	252.503	268.479	309.443
YDL125C::chr4_2:up	104.321	97.0885	212.09
YDL127W::chr4_2:up	304.663	273.433	251.495
YDL128W::chr4_2:up	9.48368	14.8605	13.9076
YDL129W::chr4_2:up	567.836	372.503	426.499
YDL130W-A::chr00_2:up	2152.8	1833.78	1960.97
YDL130W::chr4_2:up	877.241	522.098	535.441
YDL131W::chr4_2:up	644.891	387.363	602.661
YDL133C-A::chr00_14:up	491.966	347.735	356.961
YDL133W::chr4_2:up	564.279	546.866	491.401
YDL134C-A::chr4_2:up	622.367	631.075	636.271
YDL134C::chr4_2:up	311.776	284.331	319.874
YDL135C::chr4_2:up	546.497	437.889	462.427
YDL136W::chr4_2:up	1918.08	1255.22	1187.94
YDL137W::chr4_2:up	406.613	353.68	417.227
YDL138W::chr4_2:up	222.867	247.675	178.48
YDL142C::chr4_2:up	471.813	498.322	388.253
YDL144C::chr4_2:up	629.48	649.899	589.913
YDL146W::chr4_2:up	247.761	276.405	237.588
YDL149W::chr4_2:up	528.715	444.824	494.878
YDL151C::chr4_2:up	4.74184	2.9721	31.292
YDL154W::chr4_2:up	4732.36	4255.05	4562.84
YDL155W::chr4_2:up	463.515	420.056	432.293
YDL156W::chr4_2:up	668.6	524.08	856.474
YDL157C::chr4_2:up	457.588	417.084	440.406
YDL160C::chr4_2:up	117.361	84.2094	26.6562
YDL161W::chr4_2:up	640.149	679.62	682.63
YDL162C::chr4_2:up	740.913	785.624	803.162
YDL167C::chr4_2:up	559.537	426.001	418.386
YDL168W::chr4_2:up	187.303	238.758	432.293
YDL169C::chr4_2:up	508.563	433.926	569.051
YDL170W::chr4_2:up	548.868	484.452	490.242
YDL171C::chr4_2:up	559.537	483.461	469.38
YDL172C::chr4_2:up	184.932	85.2001	126.327
YDL173W::chr4_2:up	144.626	155.54	96.194
YDL174C::chr4_2:up	382.904	391.326	249.177
YDL175C::chr4_2:up	14.2255	8.91629	10.4307
YDL176W::chr4_2:up	974.449	1295.83	1089.43
YDL177C::chr4_2:up	832.193	693.489	989.755
YDL178W::chr4_2:up	488.41	426.001	483.288
YDL179W::chr4_2:up	719.575	527.052	548.19
YDL180W::chr4_2:up	395.944	635.038	548.19
YDL182W::chr4_2:up	858.273	848.038	757.962
YDL183C::chr4_2:up	289.252	299.191	283.946
YDL184C::chr4_2:up	622.367	273.433	470.539
YDL185W::chr4_2:up	21.3383	18.8233	38.2458
YDL186W::chr4_2:up	716.018	620.178	767.234
YDL187C::chr4_2:up	826.266	609.28	620.046
YDL188C::chr4_2:up	778.848	752.931	828.659
YDL189W::chr4_2:up	2155.17	2153.78	2107
YDL190C::chr4_2:up	867.757	1052.12	1276.02
YDL191W::chr4_3:up	224.052	104.023	30.1331
YDL192W::chr4_3:up	480.111	147.614	268.88
YDL194W::chr00_16b:up	2351.95	2166.66	1606.32
YDL197C::chr4_3:up	407.798	350.707	296.695
YDL198C::chr4_3:up	366.307	213	70.6968
YDL199C::chr4_3:up	729.058	382.41	604.979
YDL200C::chr4_3:up	1133.3	959.987	1069.72
YDL201W::chr4_3:up	519.232	330.894	305.966
YDL202W::chr4_3:up	470.628	404.205	249.177
YDL203C::chr4_3:up	515.675	449.777	516.898
YDL204W::chr4_3:up	399.5	323.959	251.495
YDL206W::chr4_3:up	8.29822	3.9628	12.7486
YDL210W::chr4_3:up	3826.67	3066.21	3191.79
YDL211C::chr4_3:up	501.45	256.591	315.238
YDL213C::chr4_3:up	80.6113	70.3396	73.0147
YDL214C::chr4_3:up	10.6691	21.7954	26.6562
YDL215C::chr4_3:up	615.254	630.085	730.147
YDL216C::chr4_3:up	240.648	247.675	230.634
YDL218W::chr4_3:up	248.947	152.568	141.394
YDL219W::chr4_3:up	470.628	386.373	348.848
YDL222C::chr4_3:up	550.054	490.396	598.025
YDL223C::chr4_3:up	196.786	186.251	221.362
YDL224C::chr4_3:up	625.923	595.41	553.985
YDL225W::chr4_3:up	131.586	153.558	122.85
YDL226C::chr4_3:up	60.4585	88.1722	111.261
YDL227C::chr4_3:up	910.434	744.015	841.408
YDL229W::chr4_3:up	342.598	367.549	238.747
YDL230W::chr4_3:up	430.322	318.014	434.611
YDL231C::chr4_3:up	454.031	462.656	512.262
YDL233W::chr4_3:up	393.573	395.289	321.033
YDL234C::chr4_3:up	399.5	414.112	344.212
YDL236W::chr4_3:up	787.146	596.401	686.107
YDL237W::chr4_3:up	253.689	224.889	310.602
YDL238C::chr4_3:up	215.754	120.865	183.116
YDL239C::chr4_3:up	501.45	417.084	453.155
YDL240W::chr4_3:up	426.766	315.042	251.495
YDL241W::chr4_3:up	194.416	130.772	177.321
YDL242W::chr4_3:up	397.129	339.81	332.623
YDL243C::chr4_3:up	233.536	195.168	194.706
YDR001C::chr4_3:up	702.978	558.754	456.632
YDR003W::chr4_3:up	425.58	348.726	369.709
YDR004W::chr4_3:up	308.22	266.498	178.48
YDR005C::chr4_3:up	244.205	142.661	180.798
YDR006C::chr4_3:up	222.867	230.833	195.865
YDR007W::chr00_16b:up	101.95	83.2187	54.4713
YDR008C::chr4_3:up	17.7819	6.93489	9.27171
YDR009W::chr4_3:up	365.122	239.749	303.648
YDR010C::chr4_3:up	691.123	415.103	482.129
YDR011W::chr4_3:up	812.04	706.368	655.973
YDR014W::chr4_3:up	598.658	452.75	295.536
YDR015C::chr4_3:up	486.039	373.494	535.441
YDR017C::chr4_3:up	132.772	49.535	50.9944
YDR018C::chr4_3:up	514.49	438.88	391.73
YDR019C::chr4_3:up	358.009	395.289	377.822
YDR020C::chr4_3:up	1143.97	654.852	793.89
YDR022C::chr4_3:up	308.22	202.103	241.064
YDR024W::chr4_3:up	259.616	175.354	83.4454
YDR025W::chr4_3:up	375.791	264.517	163.414
YDR026C::chr4_3:up	602.214	434.917	573.687
YDR027C::chr4_3:up	16.5964	15.8512	15.0665
YDR028C::chr4_3:up	1763.97	1240.36	1153.17
YDR029W::chr4_3:up	2495.39	1960.59	2190.44
YDR030C::chr4_3:up	2.37092	370.521	3.47689
YDR031W::chr4_3:up	813.226	785.624	1052.34
YDR032C::chr4_3:up	240.648	216.963	275.833
YDR033W::chr4_3:up	810.855	585.503	584.118
YDR034C::chr4_3:up	224.052	257.582	194.706
YDR035W::chr4_3:up	427.951	194.177	202.819
YDR036C::chr4_3:up	363.936	336.838	361.597
YDR042C::chr4_3:up	226.423	193.186	311.761
YDR043C::chr4_3:up	481.297	273.433	331.464
YDR046C::chr4_3:up	566.65	410.149	486.765
YDR048C::chr00_16b:up	177.819	170.4	92.7171
YDR049W::chr4_4:up	1435.59	1578.18	1700.2
YDR051C::chr4_4:up	603.399	575.596	573.687
YDR055W::chr4_4:up	296.365	253.619	222.521
YDR056C::chr4_4:up	433.879	277.396	355.802
YDR057W::chr4_4:up	289.252	289.284	203.978
YDR058C::chr00_14:up	116.175	168.419	173.845
YDR059C::chr4_4:up	572.577	516.154	516.898
YDR061W::chr4_4:up	809.67	661.787	664.086
YDR063W::chr4_4:up	222.867	218.945	230.634
YDR065W::chr4_4:up	374.606	373.494	198.183
YDR066C::chr4_4:up	682.825	630.085	645.543
YDR067C::chr4_4:up	1230.51	879.741	604.979
YDR068W::chr4_4:up	739.727	549.838	542.395
YDR069C::chr4_4:up	253.689	181.298	120.532
YDR070C::chr4_4:up	358.009	376.466	316.397
YDR071C::chr00_11:up	1173.61	770.764	1029.16
YDR072C::chr4_4:up	836.935	749.959	957.304
YDR073W::chr4_4:up	1785.3	1463.26	1734.97
YDR074W::chr00_11:up	749.211	530.024	458.95
YDR075W::chr4_4:up	209.827	129.782	192.388
YDR076W::chr4_4:up	1005.27	931.257	690.742
YDR077W::chr4_4:up	643.705	508.229	705.809
YDR078C::chr4_4:up	540.57	439.87	511.103
YDR079W::chr4_4:up	10.6691	10.8977	13.9076
YDR080W::chr4_4:up	284.511	210.028	224.839
YDR083W::chr4_4:up	1107.22	769.773	513.421
YDR084C::chr4_4:up	488.41	552.81	457.791
YDR085C::chr4_4:up	1082.33	703.396	779.983
YDR089W::chr4_4:up	755.138	913.425	662.927
YDR090C::chr4_4:up	705.349	622.159	773.029
YDR093W::chr4_4:up	476.555	406.187	449.678
YDR094W::chr4_4:up	699.422	575.596	601.502
YDR095C::chr4_4:up	821.524	655.843	770.711
YDR096W::chr4_4:up	423.209	448.787	434.611
YDR097C::chr4_4:up	743.284	720.238	611.933
YDR098C::chr4_4:up	508.563	501.294	477.493
YDR099W::chr4_4:up	537.014	360.614	351.166
YDR100W::chr4_4:up	544.126	595.41	632.794
YDR101C::chr4_4:up	782.404	593.429	362.756
YDR102C::chr4_4:up	272.656	313.061	380.14
YDR104C::chr4_4:up	726.687	660.796	570.21
YDR107C::chr4_4:up	458.773	542.903	465.903
YDR108W::chr4_4:up	354.453	333.866	300.172
YDR109C::chr4_4:up	487.224	533.987	492.56
YDR110W::chr4_4:up	514.49	616.215	703.491
YDR111C::chr4_4:up	551.239	344.763	645.543
YDR112W::chr4_4:up	689.938	588.475	805.48
YDR114C::chr4_4:up	695.865	726.182	397.525
YDR115W::chr4_4:up	354.453	268.479	148.347
YDR116C::chr4_4:up	297.551	421.047	289.741
YDR117C::chr4_4:up	208.641	226.87	199.342
YDR119W::chr4_4:up	500.264	532.996	614.251
YDR120C::chr4_4:up	462.33	472.563	471.698
YDR121W::chr4_4:up	1192.57	1120.48	961.94
YDR122W::chr4_4:up	689.938	583.522	544.713
YDR123C::chr4_4:up	1008.83	817.327	799.685
YDR124W::chr4_4:up	488.41	445.815	362.756
YDR125C::chr4_4:up	775.291	644.945	500.672
YDR126W::chr4_4:up	307.034	174.363	163.414
YDR127W::chr4_4:up	14.2255	13.8698	45.1996
YDR128W::chr4_4:up	1737.89	1329.52	1041.91
YDR130C::chr4_4:up	606.956	472.563	534.282
YDR131C::chr4_4:up	496.708	619.187	543.554
YDR132C::chr4_4:up	608.141	547.857	472.857
YDR133C::chr4_4:up	546.497	548.847	496.036
YDR134C::chr4_4:up	1026.61	651.88	681.471
YDR135C::chr4_4:up	547.683	481.48	598.025
YDR136C::chr4_4:up	935.328	802.466	651.338
YDR137W::chr4_4:up	341.413	228.851	259.608
YDR138W::chr4_4:up	28.4511	28.7303	25.4972
YDR139C::chr4_4:up	355.638	373.494	350.007
YDR140W::chr4_4:up	513.304	215.972	140.235
YDR142C::chr4_4:up	437.435	350.707	398.684
YDR143C::chr4_4:up	333.114	271.452	482.129
YDR144C::chr4_4:up	387.646	372.503	405.637
YDR146C::chr4_4:up	315.332	288.293	246.859
YDR147W::chr4_5:up	1159.38	926.304	1197.21
YDR148C::chr4_5:up	184.932	141.67	107.784
YDR149C::chr4_5:up	131.586	106.005	136.758
YDR150W::chr4_5:up	532.272	332.875	248.018
YDR151C::chr4_5:up	1266.07	1277.01	1040.75
YDR152W::chr4_5:up	2763.31	2505.48	2089.61
YDR153C::chr4_5:up	1404.77	1358.25	1386.12
YDR154C::chr4_5:up	1314.68	1649.51	2166.1
YDR155C::chr4_5:up	212.197	206.065	333.782
YDR156W::chr4_5:up	2349.58	1941.77	1674.7
YDR157W::chr4_5:up	2066.26	1522.7	1490.43
YDR158W::chr4_5:up	84.1677	30.7117	67.2199
YDR159W::chr4_5:up	424.395	223.898	70.6968
YDR161W::chr4_5:up	233.536	131.763	101.989
YDR162C::chr4_5:up	595.101	681.601	609.615
YDR163W::chr4_5:up	673.342	665.75	744.055
YDR165W::chr4_5:up	18.9674	13.8698	37.0868
YDR169C::chr4_5:up	585.617	612.252	810.116
YDR171W::chr4_5:up	1498.42	1104.63	1082.47
YDR174W::chr00_14:up	454.031	263.526	108.943
YDR176W::chr4_5:up	11.8546	23.7768	4.63585
YDR178W::chr4_5:up	584.432	745.996	644.384
YDR179W-A::chr4_5:up	14.2255	23.7768	34.7689
YDR181C::chr4_5:up	2157.54	1695.09	1861.3
YDR183W::chr4_5:up	656.745	638.01	821.705
YDR184C::chr4_5:up	2758.57	2017.06	1963.28
YDR185C::chr4_5:up	1491.31	1057.08	1767.42
YDR186C::chr4_5:up	803.742	820.299	755.644
YDR191W::chr4_5:up	1130.93	1192.8	1170.55
YDR192C::chr4_5:up	1223.4	1146.24	1225.02
YDR193W::chr4_5:up	2525.03	2688.76	2900.89
YDR194C::chr4_5:up	13.0401	16.8419	28.9741
YDR195W::chr4_5:up	720.76	627.113	373.186
YDR197W::chr4_5:up	112.619	117.893	120.532
YDR198C::chr4_5:up	2010.54	1342.4	1994.58
YDR200C::chr4_5:up	58.0876	35.6652	25.4972
YDR202C::chr00_14:up	663.858	486.433	429.976
YDR203W::chr4_5:up	601.028	426.001	337.258
YDR204W::chr4_5:up	893.837	1056.09	988.596
YDR205W::chr00_14:up	5251.59	4301.62	5042.65
YDR206W::chr4_5:up	1030.17	1246.3	1002.5
YDR207C::chr4_5:up	295.18	239.749	101.989
YDR209C::chr4_5:up	1556.51	1279.98	1605.16
YDR210W::chr4_5:up	1785.3	1202.71	1615.6
YDR213W::chr4_5:up	820.339	821.29	830.977
YDR214W::chr4_5:up	1047.95	941.164	1214.59
YDR215C::chr4_5:up	1659.64	1307.72	1488.11
YDR216W::chr4_5:up	945.997	731.136	747.532
YDR217C::chr4_5:up	476.555	430.954	523.852
YDR218C::chr4_5:up	991.045	972.867	956.145
YDR219C::chr4_5:up	836.935	790.578	861.11
YDR220C::chr4_5:up	623.552	463.647	720.875
YDR221W::chr4_5:up	1209.17	1050.14	1376.85
YDR222W::chr4_5:up	1422.55	1106.61	1360.62
YDR223W::chr4_5:up	425.58	412.131	434.611
YDR225W::chr4_5:up	145.812	147.614	111.261
YDR229W::chr4_5:up	726.687	825.252	863.428
YDR230W::chr4_5:up	81.7968	118.884	99.6709
YDR231C::chr4_5:up	13.0401	8.91629	6.95378
YDR233C::chr4_5:up	1315.86	1800.1	1765.1
YDR234W::chr4_5:up	700.607	908.471	950.35
YDR237W::chr4_5:up	13.0401	24.7675	22.0203
YDR239C::chr4_5:up	295.18	363.587	367.392
YDR241W::chr4_5:up	107.877	92.135	37.0868
YDR242W::chr00_17a:up	207.456	269.47	184.275
YDR244W::chr4_6:up	86.5386	155.54	126.327
YDR245W::chr4_6:up	7.11276	17.8326	15.0665
YDR247W::chr4_6:up	20.1528	79.2559	82.2864
YDR248C::chr4_6:up	100.764	262.535	180.798
YDR249C::chr4_6:up	126.844	196.158	208.613
YDR250C::chr4_6:up	11.8546	53.4978	20.8613
YDR251W::chr4_6:up	218.125	307.117	280.469
YDR252W::chr4_6:up	43.862	114.921	82.2864
YDR253C::chr4_6:up	16.5964	72.321	77.6506
YDR254W::chr4_6:up	117.361	212.01	205.137
YDR256C::chr4_6:up	137.513	374.484	307.125
YDR257C::chr4_6:up	37.9347	98.0792	60.2661
YDR258C::chr4_6:up	73.4985	135.726	134.44
YDR259C::chr4_6:up	264.358	455.722	362.756
YDR260C::chr4_6:up	8.29822	32.6931	17.3845
YDR261C::chr4_6:up	135.142	250.647	228.316
YDR262W::chr4_6:up	72.3131	137.707	129.804
YDR263C::chr4_6:up	15.411	40.6187	48.6765
YDR264C::chr4_6:up	74.684	31.7024	8.11275
YDR265W::chr4_6:up	47.4184	173.372	110.102
YDR266C::chr4_6:up	4.74184	26.7489	23.1793
YDR268W::chr4_6:up	36.7493	99.0699	60.2661
YDR269C::chr4_6:up	13.0401	30.7117	24.3382
YDR271C::chr4_6:up	7.11276	31.7024	12.7486
YDR272W::chr4_6:up	78.2404	186.251	163.414
YDR273W::chr4_6:up	85.3532	73.3117	180.798
YDR274C::chr4_6:up	34.3784	46.5629	55.6303
YDR275W::chr4_6:up	41.4911	1.9814	2.31793
YDR276C::chr4_6:up	4.74184	31.7024	9.27171
YDR277C::chr4_6:up	7.11276	27.7396	22.0203
YDR278C::chr4_6:up	2.37092	20.8047	11.5896
YDR279W::chr4_6:up	49.7893	204.084	166.891
YDR281C::chr4_6:up	1314.68	1578.18	1200.69
YDR282C::chr4_6:up	20.1528	35.6652	31.292
YDR283C::chr4_6:up	77.0549	70.3396	62.584
YDR284C::chr4_6:up	24.8947	53.4978	26.6562
YDR285W::chr4_6:up	10.6691	39.628	32.451
YDR286C::chr4_6:up	75.8695	161.484	115.896
YDR287W::chr4_6:up	164.779	239.749	325.669
YDR290W::chr4_6:up	3.55638	13.8698	4.63585
YDR291W::chr4_6:up	448.104	566.68	700.014
YDR293C::chr4_6:up	45.0475	77.2745	52.1534
YDR294C::chr4_6:up	295.18	524.08	366.233
YDR295C::chr4_6:up	24.8947	79.2559	69.5378
YDR296W::chr4_6:up	41.4911	74.3024	44.0406
YDR297W::chr4_6:up	277.398	492.377	431.135
YDR298C::chr4_6:up	14.2255	59.4419	30.1331
YDR300C::chr4_6:up	52.1603	112.94	69.5378
YDR304C::chr4_6:up	576.134	539.931	662.927
YDR305C::chr4_6:up	93.6514	163.465	173.845
YDR306C::chr4_6:up	219.31	281.359	276.992
YDR307W::chr4_6:up	41.4911	158.512	128.645
YDR309C::chr4_6:up	45.0475	153.558	119.373
YDR310C::chr4_6:up	740.913	976.829	756.803
YDR312W::chr4_6:up	71.1276	254.61	165.732
YDR313C::chr4_6:up	50.9748	143.651	112.419
YDR314C::chr4_6:up	186.117	465.629	428.817
YDR316W::chr4_6:up	23.7092	103.033	100.83
YDR317W::chr4_6:up	130.401	277.396	246.859
YDR318W::chr4_6:up	11.8546	15.8512	18.5434
YDR319C::chr4_6:up	861.83	1443.45	1287.61
YDR320C::chr4_6:up	16.5964	35.6652	20.8613
YDR321W::chr4_6:up	224.052	351.698	254.972
YDR322W::chr4_6:up	20.1528	58.4512	40.5637
YDR326C::chr00_17a:up	196.786	318.014	351.166
YDR329C::chr4_6:up	40.3057	175.354	124.009
YDR330W::chr4_6:up	34.3784	92.135	61.4251
YDR332W::chr4_6:up	3.55638	16.8419	9.27171
YDR333C::chr4_6:up	52.1603	121.856	93.8761
YDR334W::chr4_6:up	78.2404	204.084	151.824
YDR335W::chr4_6:up	18.9674	46.5629	38.2458
YDR337W::chr4_6:up	9.48368	34.6745	20.8613
YDR338C::chr4_7:up	186.117	347.735	326.828
YDR340W::chr4_7:up	215.754	278.386	200.501
YDR344C::chr4_7:up	303.478	730.145	500.672
YDR345C::chr4_7:up	26.0801	86.1908	77.6506
YDR346C::chr4_7:up	104.321	51.5164	60.2661
YDR347W::chr4_7:up	257.245	429.963	166.891
YDR348C::chr4_7:up	46.233	161.484	89.2402
YDR349C::chr4_7:up	272.656	410.149	372.027
YDR350C::chr4_7:up	9.48368	13.8698	18.5434
YDR351W::chr4_7:up	22.5237	80.2466	52.1534
YDR352W::chr4_7:up	66.3858	151.577	111.261
YDR354W::chr4_7:up	11.8546	17.8326	18.5434
YDR357C::chr4_7:up	48.6039	136.716	148.347
YDR358W::chr4_7:up	28.4511	45.5722	49.8354
YDR360W::chr4_7:up	284.511	278.386	256.131
YDR363W-A::chr00_2:up	657.931	1044.2	764.916
YDR363W::chr4_7:up	40.3057	100.061	48.6765
YDR368W::chr4_7:up	41.4911	122.847	114.737
YDR369C::chr4_7:up	40.3057	39.628	23.1793
YDR370C::chr4_7:up	190.859	260.554	222.521
YDR371W::chr4_7:up	1290.97	1883.32	1875.2
YDR372C::chr4_7:up	458.773	770.764	602.661
YDR374C::chr4_7:up	69.9422	59.4419	92.7171
YDR375C::chr4_7:up	8.29822	11.8884	12.7486
YDR377W::chr4_7:up	11.8546	13.8698	8.11275
YDR378C::chr4_7:up	152.924	191.205	151.824
YDR379W::chr4_7:up	96.0223	185.261	172.686
YDR380W::chr4_7:up	399.5	267.489	412.591
YDR383C::chr4_7:up	67.5712	113.93	101.989
YDR384C::chr4_7:up	501.45	461.666	486.765
YDR385W::chr4_7:up	202.714	323.959	199.342
YDR386W::chr4_7:up	107.877	141.67	96.194
YDR387C::chr4_7:up	181.375	270.461	150.665
YDR388W::chr4_7:up	207.456	307.117	115.896
YDR389W::chr4_7:up	18.9674	28.7303	52.1534
YDR391C::chr4_7:up	200.343	293.247	307.125
YDR393W::chr4_7:up	120.917	194.177	90.3992
YDR395W::chr4_7:up	104.321	151.577	276.992
YDR399W::chr4_7:up	157.666	201.112	179.639
YDR400W::chr4_7:up	111.433	153.558	121.691
YDR402C::chr4_7:up	78.2404	218.945	187.752
YDR403W::chr4_7:up	246.576	360.614	264.244
YDR405W::chr4_7:up	269.1	226.87	205.137
YDR406W::chr4_7:up	90.095	282.349	200.501
YDR408C::chr4_7:up	23.7092	64.3954	31.292
YDR409W::chr4_7:up	119.732	251.638	202.819
YDR411C::chr4_7:up	414.911	572.624	486.765
YDR414C::chr4_7:up	220.496	382.41	282.787
YDR415C::chr4_7:up	26.0801	120.865	95.035
YDR417C::chr00_17a/chr00_18:up	347.34	370.521	110.102
YDR418W::chr4_7:up	864.201	852.992	470.539
YDR419W::chr4_7:up	1065.73	764.82	883.13
YDR420W::chr4_7:up	42.6766	92.135	75.3326
YDR421W::chr4_7:up	195.601	219.935	258.449
YDR422C::chr4_7:up	28.4511	59.4419	54.4713
YDR423C::chr4_7:up	277.398	465.629	374.345
YDR424C::chr00_8:up	94.8368	119.875	124.009
YDR425W::chr4_7:up	55.7166	166.437	127.486
YDR426C::chr4_7:up	103.135	168.419	127.486
YDR428C::chr4_7:up	176.634	225.879	227.157
YDR430C::chr4_7:up	627.109	686.554	690.742
YDR431W::chr4_7:up	231.165	346.745	345.371
YDR432W::chr4_7:up	42.6766	27.7396	57.9482
YDR433W::chr4_7:up	52.1603	38.6373	63.743
YDR435C::chr4_7:up	58.0876	110.958	50.9944
YDR436W::chr4_7:up	551.239	547.857	715.081
YDR438W::chr4_8:up	459.959	582.531	626.999
YDR439W::chr4_8:up	605.77	639.001	556.303
YDR440W::chr4_8:up	179.005	344.763	346.53
YDR441C::chr4_8:up	573.763	671.694	533.123
YDR442W::chr4_8:up	110.248	165.447	110.102
YDR443C::chr4_8:up	106.691	185.261	115.896
YDR444W::chr00_17a:up	93.6514	190.214	132.122
YDR445C::chr00_14:up	272.656	262.535	343.053
YDR446W::chr4_8:up	326.002	405.196	410.273
YDR447C::chr4_8:up	359.195	637.02	360.438
YDR448W::chr4_8:up	73.4985	84.2094	44.0406
YDR450W::chr4_8:up	87.7241	138.698	61.4251
YDR451C::chr4_8:up	358.009	504.266	442.724
YDR452W::chr4_8:up	21.3383	55.4792	33.6099
YDR455C::chr4_8:up	16.5964	81.2373	82.2864
YDR456W::chr4_8:up	4.74184	8.91629	12.7486
YDR457W::chr4_8:up	885.539	1141.29	652.497
YDR459C::chr4_8:up	105.506	97.0885	121.691
YDR461W::chr00_17a:up	883.168	1539.55	1593.58
YDR463W::chr4_8:up	218.125	251.638	194.706
YDR465C::chr4_8:up	293.994	235.786	175.004
YDR466W::chr4_8:up	133.957	146.623	103.148
YDR467C::chr4_8:up	5.9273	27.7396	9.27171
YDR469W::chr4_8:up	542.941	513.182	491.401
YDR474C::chr4_8:up	161.223	161.484	206.296
YDR475C::chr4_8:up	49.7893	205.075	148.347
YDR476C::chr4_8:up	465.886	695.471	577.164
YDR477W::chr4_8:up	225.237	407.177	447.36
YDR479C::chr4_8:up	309.405	342.782	367.392
YDR480W::chr4_8:up	463.515	649.899	782.301
YDR481C::chr4_8:up	497.893	715.285	541.236
YDR482C::chr4_8:up	336.671	256.591	387.094
YDR483W::chr4_8:up	1082.33	1294.84	1383.8
YDR484W::chr4_8:up	40.3057	129.782	75.3326
YDR485C::chr4_8:up	88.9095	221.917	201.66
YDR486C::chr4_8:up	322.445	326.931	296.695
YDR488C::chr4_8:up	296.365	178.326	178.48
YDR490C::chr4_8:up	393.573	324.949	288.582
YDR491C::chr4_8:up	263.172	402.224	363.915
YDR492W::chr4_8:up	544.126	789.587	614.251
YDR493W::chr00_17a:up	431.508	281.359	527.328
YDR494W::chr4_8:up	90.095	88.1722	157.619
YDR495C::chr4_8:up	369.864	328.912	173.845
YDR496C::chr4_8:up	205.085	341.791	156.46
YDR497C::chr4_8:up	745.655	994.662	919.058
YDR500C::chr00_17a:up	116.175	277.396	265.403
YDR500C::chr4_8:up	114.99	135.726	193.547
YDR501W::chr4_8:up	611.698	801.476	708.127
YDR502C::chr00_17a:up	640.149	796.522	792.731
YDR503C::chr4_8:up	363.936	366.559	497.195
YDR504C::chr4_8:up	151.739	256.591	193.547
YDR505C::chr4_8:up	636.592	540.922	534.282
YDR506C::chr00_17a:up	1055.06	1057.08	1075.52
YDR506C::chr4_8:up	208.641	152.568	222.521
YDR507C::chr4_8:up	305.849	282.349	249.177
YDR508C::chr4_8:up	349.711	600.364	642.066
YDR509W::chr4_8:up	141.07	322.968	148.347
YDR511W::chr4_8:up	157.666	282.349	231.793
YDR512C::chr00_17a:up	34.3784	69.3489	41.7227
YDR512C::chr4_8:up	170.706	173.372	122.85
YDR513W::chr4_8:up	695.865	826.243	1097.54
YDR514C::chr4_8:up	247.761	347.735	299.013
YDR515W::chr00_17a:up	339.042	361.605	254.972
YDR516C::chr4_8:up	1.18546	484.452	426.499
YDR518W::chr4_8:up	680.454	1133.36	990.914
YDR519W::chr4_8:up	32.0074	48.5443	38.2458
YDR520C::chr4_8:up	250.132	481.48	429.976
YDR521W::chr4_8:up	1910.96	2743.25	2992.44
YDR522C::chr4_8:up	483.668	543.894	617.728
YDR523C::chr4_8:up	280.954	426.001	302.49
YDR524C::chr4_8:up	280.954	425.01	410.273
YDR525W-A::chr00_2:up	930.586	710.331	706.968
YDR525W::chr4_8:up	1011.2	1162.09	1203
YDR528W::chr4_8:up	790.702	576.587	623.522
YDR529C::chr4_8:up	309.405	228.851	181.957
YDR530C::chr4_8:up	681.64	452.75	609.615
YDR532C::chr4_8:up	64.0149	26.7489	41.7227
YDR533C::chr4_8:up	237.092	137.707	185.434
YDR534C::chr4_8:up	538.199	415.103	453.155
YDR535C::chr00_2:up	259.616	1.9814	260.767
YDR536W::chr00_2:up	419.653	534.978	576.005
YDR537C::chr00_14:up	252.503	386.373	270.039
YDR538W::chr00_2:up	615.254	459.684	540.077
YDR539W::chr00_2:up	1280.3	956.025	981.642
YDR540C::chr00_2:up	34.3784	41.6094	64.902
YDR541C::chr00_2:up	508.563	807.42	675.676
YEL001C::chr5_2:up	7870.27	6919.04	8410.6
YEL003W::chr5_2:up	1511.46	1083.82	737.101
YEL004W::chr5_2:up	937.699	633.057	713.922
YEL005C::chr5_2:up	245.39	337.828	293.218
YEL006W::chr5_2:up	81.7968	190.214	129.804
YEL008W::chr5_2:up	328.373	316.033	260.767
YEL009C::chr5_2:up	1077.58	468.601	533.123
YEL010W::chr5_2:up	397.129	463.647	475.175
YEL011W::chr00_8:up	132.772	241.731	175.004
YEL012W::chr00_10:up	106.691	141.67	140.235
YEL013W::chr5_2:up	5.9273	0.990699	17.3845
YEL014C::chr5_2:up	608.141	563.708	654.815
YEL015W::chr5_2:up	432.693	292.256	317.556
YEL016C::chr5_2:up	769.364	1033.3	866.905
YEL017C-A::chr5_2:up	451.66	497.331	406.796
YEL017W::chr5_2:up	387.646	273.433	312.92
YEL018W::chr5_2:up	449.29	292.256	464.744
YEL020C::chr5_2:up	302.292	280.368	336.099
YEL023C::chr5_2:up	596.287	613.243	633.953
YEL024W::chr5_2:up	1.18546	24.7675	20.8613
YEL025C::chr5_2:up	376.976	372.503	535.441
YEL027W::chr5_2:up	81.7968	76.2838	24.3382
YEL028W::chr5_2:up	33.1929	143.651	115.896
YEL029C::chr5_2:up	9.48368	29.721	12.7486
YEL030W::chr5_2:up	208.641	377.456	370.868
YEL031W::chr5_2:up	295.18	182.289	118.214
YEL036C::chr5_2:up	23.7092	24.7675	18.5434
YEL037C::chr5_2:up	1019.5	1174.97	1432.48
YEL038W::chr5_2:up	724.316	659.806	744.055
YEL039C::chr5_2:up	2509.62	2205.3	2231.01
YEL040W::chr5_2:up	2963.65	2089.38	2425.71
YEL041W::chr5_2:up	2432.56	2292.48	2348.06
YEL042W::chr5_2:up	4756.07	4048	4475.92
YEL043W::chr5_2:up	2918.6	2190.44	2630.85
YEL044W::chr5_2:up	24.8947	13.8698	23.1793
YEL047C::chr5_2:up	5773.19	5609.34	5899.13
YEL048C::chr5_2:up	5340.5	4006.39	3950.91
YEL049W::chr5_2:up	644.891	699.434	858.792
YEL050C::chr5_2:up	725.502	543.894	175.004
YEL051W::chr5_2:up	0	14.8605	3.47689
YEL052W::chr5_2:up	458.773	390.335	443.883
YEL053C::chr5_2:up	29.6365	67.3675	33.6099
YEL054C::chr5_2:up	413.726	772.745	442.724
YEL056W::chr5_2:up	731.429	792.559	734.783
YEL057C::chr5_2:up	5858.55	4929.72	5507.4
YEL059W::chr5_2:up	5102.22	4960.43	5335.87
YEL060C::chr5_2:up	110.248	199.131	193.547
YEL061C::chr5_2:up	870.128	499.312	545.872
YEL062W::chr5_2:up	124.473	238.758	324.51
YEL063C::chr5_2:up	107.877	154.549	228.316
YEL064C::chr5_2:up	250.132	225.879	263.085
YEL065W::chr5_2:up	72.3131	171.391	158.778
YEL066W::chr5_2:up	284.511	444.824	467.062
YEL067C::chr5_2:up	463.515	613.243	586.436
YEL068C::chr5_2:up	935.328	744.015	836.772
YEL071W::chr5_2:up	705.349	749.959	854.156
YEL072W::chr5_2:up	467.071	435.908	471.698
YER001W::chr5_2:up	831.008	601.354	718.558
YER002W::chr5_2:up	972.078	772.745	673.358
YER004W::chr5_2:up	803.742	668.722	728.988
YER005W::chr5_2:up	1002.9	866.862	895.879
YER007C-A::chr5_2:up	2662.54	2323.19	2170.74
YER007W::chr5_2:up	795.444	633.057	688.424
YER010C::chr5_2:up	310.591	321.977	222.521
YER011W::chr5_2:up	310.591	298.2	339.576
YER016W::chr5_3:up	1142.78	715.285	614.251
YER017C::chr5_3:up	175.448	228.851	96.194
YER019C-A::chr5_3:up	61.6439	203.093	126.327
YER019W::chr5_3:up	316.518	302.163	266.562
YER020W::chr5_3:up	1496.05	1291.87	749.85
YER024W::chr5_3:up	73.4985	174.363	137.917
YER027C::chr00_11:up	1120.26	853.983	1296.88
YER028C::chr5_3:up	161.223	368.54	169.209
YER030W::chr5_3:up	398.315	367.549	293.218
YER031C::chr00_10:up	3.55638	42.6001	9.27171
YER032W::chr5_3:up	822.71	927.294	916.74
YER033C::chr5_3:up	224.052	366.559	329.146
YER034W::chr5_3:up	1292.15	1411.75	1132.31
YER037W::chr00_11:up	870.128	744.015	956.145
YER038W-A::chr5_3:up	1339.57	1047.17	1324.7
YER039C-A::chr00_2:up	1062.17	1079.86	1002.5
YER039C::chr5_3:up	59.273	145.633	98.5119
YER040W::chr5_3:up	1378.69	1100.67	763.757
YER041W::chr5_3:up	181.375	233.805	179.639
YER042W::chr5_3:up	71.1276	219.935	195.865
YER044C-A::chr5_3:up	989.86	883.704	1037.27
YER044C::chr5_3:up	64.0149	22.7861	10.4307
YER045C::chr5_3:up	819.153	869.834	843.726
YER046W-A::chr5_3:up	53.3457	134.735	135.599
YER046W::chr00_10:up	269.1	425.01	471.698
YER048C::chr5_3:up	1104.85	1187.85	1577.35
YER049W::chr5_3:up	1140.41	897.573	1050.02
YER050C::chr5_3:up	1063.36	895.592	912.104
YER051W::chr5_3:up	194.416	229.842	281.628
YER052C::chr5_3:up	9.48368	14.8605	6.95378
YER053C::chr5_3:up	488.41	392.317	373.186
YER054C::chr5_3:up	9.48368	24.7675	23.1793
YER055C::chr5_3:up	337.856	240.74	225.998
YER056C-A::chr5_3:up	3289.65	2544.12	2472.07
YER056C::chr5_3:up	277.398	289.284	251.495
YER057C::chr5_3:up	494.337	444.824	518.057
YER058W::chr5_3:up	128.03	97.0885	86.9223
YER059W::chr5_3:up	497.893	331.884	345.371
YER060W-A::chr5_3:up	206.27	300.182	310.602
YER060W::chr5_3:up	1269.63	1081.84	1083.63
YER061C::chr5_3:up	343.784	364.577	388.253
YER062C::chr5_3:up	394.758	398.261	358.12
YER063W::chr00_10:up	644.891	622.159	659.45
YER064C::chr00_8:up	331.929	445.815	311.761
YER065C::chr5_3:up	98.3932	171.391	147.188
YER066W::chr00_10:up	91.2805	223.898	152.983
YER067C-A::chr5_3:up	390.016	261.545	404.478
YER067W::chr5_3:up	46.233	106.005	118.214
YER068C-A::chr5_3:up	317.703	368.54	352.325
YER068W::chr5_3:up	11.8546	14.8605	12.7486
YER069W::chr5_3:up	433.879	424.019	405.637
YER070W::chr5_3:up	17.7819	27.7396	26.6562
YER071C::chr5_3:up	1132.11	941.164	1250.52
YER072W::chr5_3:up	33.1929	79.2559	63.743
YER073W::chr5_3:up	416.097	564.699	516.898
YER074W::chr5_3:up	906.877	680.61	440.406
YER075C::chr5_3:up	512.119	477.517	453.155
YER077C::chr00_8:up	481.297	645.936	450.837
YER078C::chr00_8:up	298.736	306.126	319.874
YER079W::chr5_3:up	82.9822	171.391	200.501
YER080W::chr5_3:up	469.442	475.536	547.031
YER081W::chr5_3:up	612.883	512.191	592.23
YER083C::chr5_3:up	105.506	199.131	104.307
YER084W::chr5_3:up	23.7092	111.949	47.5175
YER085C::chr5_3:up	211.012	286.312	246.859
YER086W::chr5_3:up	50.9748	134.735	108.943
YER087C-A::chr5_3:up	169.521	316.033	281.628
YER087W::chr5_3:up	221.681	359.624	221.362
YER088C::chr00_8:up	254.874	432.936	413.75
YER089C::chr00_17a:up	280.954	430.954	333.782
YER090W::chr00_8:up	168.335	68.3582	141.394
YER091C-A::chr00_2:up	919.917	680.61	762.598
YER091C::chr00_8:up	135.142	109.968	125.168
YER092W::chr00_8:up	46.233	106.005	71.8558
YER093C-A::chr00_8:up	222.867	357.642	274.674
YER095W::chr00_8:up	501.45	284.331	210.931
YER096W::chr00_8:up	250.132	548.847	462.427
YER097W::chr00_8:up	58.0876	152.568	120.532
YER098W::chr00_8:up	669.785	728.164	789.254
YER101C::chr00_5:up	597.472	731.136	571.369
YER103W::chr00_5:up	163.594	269.47	270.039
YER106W::chr00_5:up	689.938	585.503	493.719
YER107C::chr00_5:up	8.29822	11.8884	18.5434
YER108C::chr00_5:up	981.561	830.206	1152.01
YER109C::chr00_5:up	391.202	285.321	346.53
YER110C::chr00_5:up	858.273	802.466	535.441
YER111C::chr00_5:up	273.841	267.489	235.27
YER113C::chr00_5:up	755.138	896.583	760.28
YER114C::chr00_5:up	123.288	207.056	193.547
YER115C::chr00_5:up	321.26	464.638	428.817
YER116C::chr00_5:up	27.2656	21.7954	9.27171
YER117W::chr00_5:up	173.077	160.493	73.0147
YER118C::chr00_5:up	3.55638	10.8977	10.4307
YER119C-A::chr00_5:up	513.304	524.08	534.282
YER119C::chr00_5:up	857.088	823.271	820.546
YER120W::chr00_5:up	865.386	931.257	968.894
YER121W::chr00_5:up	1011.2	1058.07	802.003
YER122C::chr00_5:up	293.994	232.814	168.05
YER123W::chr00_5:up	545.312	368.54	448.519
YER124C::chr00_5:up	295.18	219.935	392.889
YER128W::chr00_5:up	289.252	257.582	315.238
YER129W::chr00_5:up	1121.45	867.852	1140.42
YER130C::chr00_5:up	135.142	273.433	178.48
YER131W::chr00_5:up	497.893	557.764	374.345
YER132C::chr00_5:up	694.68	405.196	429.976
YER134C::chr00_5:up	104.321	87.1815	127.486
YER135C::chr00_5:up	286.881	263.526	244.541
YER137C::chr00_5:up	593.916	505.257	359.279
YER139C::chr00_5:up	118.546	243.712	137.917
YER140W::chr00_5:up	866.572	1601.96	1353.67
YER141W::chr00_5:up	8.29822	16.8419	11.5896
YER142C::chr00_5:up	49.7893	111.949	75.3326
YER143W::chr00_5:up	4.74184	42.6001	30.1331
YER144C::chr00_2:up	227.608	274.424	338.417
YER145C::chr00_5:up	983.932	1390.94	1842.75
YER149C::chr00_5:up	514.49	530.024	412.591
YER150W::chr00_5:up	180.19	300.182	307.125
YER151C::chr00_5:up	167.15	469.591	278.151
YER152C::chr00_5:up	2758.57	2934.45	2749.06
YER154W::chr00_5:up	493.152	1222.52	960.781
YER155C::chr00_5:up	21.3383	0	15.0665
YER156C::chr00_5:up	488.41	224.889	193.547
YER158C::chr00_5:up	589.174	500.303	713.922
YER161C::chr00_5:up	167.15	154.549	253.813
YER162C::chr00_5:up	289.252	257.582	243.382
YER163C::chr00_5:up	746.84	712.313	671.04
YER164W::chr00_5:up	750.396	636.029	871.541
YER166W::chr00_5:up	548.868	279.377	500.672
YER167W::chr00_5:up	154.11	269.47	214.408
YER169W::chr00_5:up	43.862	59.4419	46.3585
YER170W::chr00_5:up	374.606	424.019	487.924
YER173W::chr00_5:up	340.227	545.875	586.436
YER174C::chr00_5:up	666.229	569.652	591.072
YER175C::chr00_5:up	124.473	170.4	139.076
YER176W::chr00_5:up	14.2255	31.7024	22.0203
YER177W::chr00_5:up	80.6113	88.1722	44.0406
YER178W::chr00_5:up	286.881	253.619	231.793
YER179W::chr00_5:up	996.972	1438.5	1518.24
YER180C::chr00_5:up	349.711	301.173	350.007
YER181C::chr00_5:up	457.588	385.382	351.166
YER182W::chr00_5:up	726.687	890.639	856.474
YER183C::chr00_5:up	208.641	253.619	250.336
YER184C::chr00_5:up	282.14	364.577	303.648
YER185W::chr00_5:up	531.086	417.084	607.297
YER186C::chr00_5:up	436.249	315.042	382.458
YER187W::chr00_5:up	233.536	413.122	387.094
YER188W::chr00_2:up	403.057	493.368	402.16
YFL001W::chr00_17a:up	7.11276	24.7675	6.95378
YFL003C::chr00_17a:up	359.195	378.447	317.556
YFL004W::chr00_17a:up	354.453	407.177	531.964
YFL006W::chr6_1:up	27.2656	64.3954	56.7892
YFL007W::chr00_17a:up	344.969	242.721	304.807
YFL010C::chr00_17a:up	218.125	211.019	229.475
YFL010W-A::chr00_17a:up	243.019	287.303	188.911
YFL011W::chr6_1:up	609.327	413.122	513.421
YFL012W::chr00_17a:up	889.095	876.769	775.347
YFL013C::chr00_17a:up	205.085	252.628	181.957
YFL013W-A::chr00_15:up	40.3057	63.4047	63.743
YFL014W::chr00_15:up	695.865	552.81	526.17
YFL015C::chr6_1:up	32.0074	112.94	77.6506
YFL016C::chr00_17a:up	64.0149	78.2652	26.6562
YFL018C::chr6_1:up	896.208	902.527	857.633
YFL019C::chr00_15:up	308.22	270.461	289.741
YFL020C::chr6_1:up	214.568	206.065	207.455
YFL021W::chr6_1:up	772.92	1102.65	977.006
YFL025C::chr6_1:up	85.3532	87.1815	42.8817
YFL027C::chr6_1:up	685.196	520.117	516.898
YFL028C::chr6_1:up	518.046	351.698	380.14
YFL030W::chr6_1:up	521.603	673.675	674.517
YFL031W::chr6_1:up	546.497	442.843	637.43
YFL032W::chr6_1:up	228.794	126.809	163.414
YFL033C::chr00_17a/chr00_18:up	2999.22	2235.02	2175.37
YFL034C-A::chr00_2:up	812.04	797.513	705.809
YFL034W::chr6_1:up	358.009	304.145	297.854
YFL035C-B::chr6_1:up	721.945	525.071	640.907
YFL036W::chr6_1:up	608.141	373.494	203.978
YFL040W::chr6_1:up	406.613	234.796	325.669
YFL041W::chr6_1:up	1028.98	1183.89	1182.14
YFL042C::chr00_15:up	557.166	493.368	647.861
YFL043C::chr6_1:up	482.482	493.368	528.487
YFL044C::chr6_1:up	66.3858	57.4605	89.2402
YFL046W::chr6_1:up	482.482	478.508	509.944
YFL047W::chr6_1:up	224.052	267.489	264.244
YFL048C::chr6_1:up	114.99	187.242	149.506
YFL049W::chr6_1:up	560.723	425.01	446.201
YFL050C::chr6_1:up	596.287	317.024	451.996
YFL051C::chr6_1:up	239.463	365.568	324.51
YFL052W::chr6_1:up	296.365	373.494	375.504
YFL053W::chr6_1:up	547.683	518.136	368.55
YFL054C::chr6_1:up	606.956	679.62	652.497
YFL055W::chr6_1:up	750.396	729.155	747.532
YFL056C::chr6_1:up	141.07	125.819	147.188
YFL063W::chr00_18:up	461.144	304.145	319.874
YFR001W::chr6_1:up	92.4659	29.721	15.0665
YFR006W::chr6_1:up	687.567	549.838	664.086
YFR007W::chr6_1:up	186.117	290.275	260.767
YFR008W::chr6_1:up	133.957	94.1164	133.281
YFR009W::chr6_1:up	381.718	309.098	282.787
YFR010W::chr6_1:up	388.831	397.27	365.074
YFR011C::chr00_16b:up	301.107	175.354	232.952
YFR012W::chr6_1:up	519.232	452.75	460.109
YFR013W::chr00_16b:up	622.367	946.118	825.182
YFR014C::chr6_1:up	53.3457	68.3582	74.1737
YFR015C::chr6_1:up	772.92	458.694	673.358
YFR016C::chr6_1:up	103.135	193.186	199.342
YFR017C::chr6_1:up	1015.94	1123.45	1214.59
YFR018C::chr6_1:up	324.816	583.522	576.005
YFR019W::chr00_15:up	46.233	76.2838	44.0406
YFR020W::chr6_1:up	426.766	449.777	485.606
YFR021W::chr6_1:up	333.114	441.852	530.805
YFR022W::chr6_1:up	826.266	652.871	858.792
YFR023W::chr6_1:up	192.045	333.866	278.151
YFR024C-A::chr6_1:up	87.7241	265.507	164.573
YFR024C::chr00_15:up	2939.94	2677.86	2623.89
YFR025C::chr00_15:up	26.0801	74.3024	42.8817
YFR026C::chr6_1:up	390.016	382.41	467.062
YFR030W::chr00_15:up	120.917	233.805	186.593
YFR031C-A::chr6_1:up	208.641	395.289	225.998
YFR032C-A::chr00_2:up	515.675	319.996	181.957
YFR032C::chr00_2:up	800.186	617.206	681.471
YFR033C::chr00_2:up	961.408	1023.39	1161.28
YFR034C::chr00_2:up	927.03	800.485	810.116
YFR035C::chr00_2:up	1895.55	1877.37	1604.01
YFR036W::chr00_2:up	422.024	354.67	333.782
YFR038W::chr00_2:up	656.745	524.08	552.826
YFR039C::chr00_14:up	1097.74	1063.02	1092.9
YFR040W::chr00_2:up	2322.32	2417.31	2382.83
YFR041C::chr00_2:up	123.288	438.88	391.73
YFR043C::chr00_2:up	444.548	536.959	536.6
YFR044C::chr00_2:up	1390.55	1578.18	1344.4
YFR045W::chr00_2:up	890.281	1014.48	920.217
YFR046C::chr00_2:up	866.572	717.266	697.696
YFR047C::chr00_2:up	1089.44	846.057	866.905
YFR048W::chr00_2:up	58.0876	56.4699	81.1275
YFR053C::chr00_2:up	273.841	398.261	416.068
YFR054C::chr00_2:up	398.315	351.698	448.519
YFR055W::chr00_2:up	548.868	648.908	786.936
YFR056C::chr00_2:up	1343.13	1076.89	1036.11
YFR057W::chr00_2:up	820.339	788.597	601.502
YGL002W::chr7_1:up	388.831	162.475	210.931
YGL003C::chr7_1:up	2381.59	1675.27	1112.61
YGL004C::chr7_1:up	1395.29	1108.59	1451.02
YGL005C::chr7_1:up	162.408	157.521	139.076
YGL006W::chr7_1:up	1417.81	1287.91	1488.11
YGL007W::chr7_1:up	182.561	173.372	128.645
YGL009C::chr7_1:up	590.359	401.233	526.17
YGL010W::chr7_1:up	527.53	311.08	308.284
YGL012W::chr7_1:up	107.877	55.4792	48.6765
YGL013C::chr7_1:up	548.868	497.331	236.429
YGL014W::chr7_1:up	689.938	587.485	347.689
YGL015C::chr7_1:up	976.819	786.615	779.983
YGL016W::chr7_1:up	200.343	193.186	103.148
YGL017W::chr7_1:up	399.5	310.089	507.626
YGL019W::chr7_1:up	103.135	47.5536	61.4251
YGL020C::chr7_1:up	35.5638	17.8326	25.4972
YGL021W::chr7_1:up	425.58	416.094	267.721
YGL023C::chr7_1:up	390.016	316.033	267.721
YGL025C::chr7_1:up	238.278	152.568	183.116
YGL026C::chr7_1:up	535.828	378.447	312.92
YGL027C::chr7_1:up	352.082	354.67	317.556
YGL028C::chr7_1:up	589.174	450.768	543.554
YGL031C::chr7_1:up	551.239	323.959	158.778
YGL032C::chr7_1:up	368.678	297.21	293.218
YGL034C::chr7_1:up	566.65	425.01	669.881
YGL035C::chr7_1:up	183.746	140.679	236.429
YGL036W::chr7_1:up	30.822	19.814	76.4916
YGL037C::chr7_1:up	4490.52	3772.58	4302.07
YGL038C::chr7_1:up	18.9674	11.8884	10.4307
YGL039W::chr7_1:up	368.678	302.163	292.059
YGL041C::chr7_1:up	865.386	800.485	835.613
YGL042C::chr7_1:up	458.773	464.638	442.724
YGL043W::chr7_1:up	219.31	213.991	163.414
YGL045W::chr7_1:up	406.613	302.163	337.258
YGL046W::chr7_1:up	521.603	453.74	479.811
YGL049C::chr7_1:up	404.242	319.005	363.915
YGL050W::chr7_1:up	445.733	381.419	375.504
YGL051W::chr7_1:up	261.987	194.177	258.449
YGL053W::chr7_1:up	972.078	701.415	795.049
YGL054C::chr7_1:up	270.285	206.065	148.347
YGL056C::chr7_1:up	753.953	583.522	613.092
YGL057C::chr7_1:up	2517.92	2746.22	2200.87
YGL058W::chr7_1:up	40.3057	10.8977	18.5434
YGL059W::chr7_1:up	765.807	634.047	536.6
YGL060W::chr7_1:up	278.583	211.019	272.356
YGL062W::chr7_1:up	686.382	695.471	642.066
YGL063W::chr7_1:up	1090.62	991.69	1259.79
YGL064C::chr7_1:up	21.3383	49.535	31.292
YGL066W::chr7_1:up	940.07	597.392	375.504
YGL067W::chr7_1:up	1526.87	1094.72	1150.85
YGL070C::chr7_1:up	28.4511	21.7954	24.3382
YGL071W::chr7_1:up	406.613	332.875	250.336
YGL072C::chr7_1:up	522.788	425.01	276.992
YGL077C::chr7_1:up	307.034	278.386	294.377
YGL078C::chr7_1:up	682.825	385.382	212.09
YGL079W::chr7_1:up	814.411	784.634	652.497
YGL080W::chr7_1:up	951.925	844.076	985.119
YGL081W::chr7_1:up	3827.85	3673.51	3897.6
YGL082W::chr7_1:up	1280.3	1087.79	1040.75
YGL083W::chr7_1:up	964.965	823.271	1140.42
YGL084C::chr7_1:up	449.29	336.838	229.475
YGL085W::chr7_1:up	757.509	726.182	797.367
YGL086W::chr7_1:up	528.715	318.014	396.366
YGL087C::chr7_1:up	8050.46	7626.4	6850.63
YGL088W::chr7_1:up	39.1202	46.5629	32.451
YGL089C::chr7_1:up	905.692	811.383	1203
YGL090W::chr7_1:up	764.622	601.354	643.225
YGL094C::chr7_1:up	5042.95	4795.97	5605.91
YGL095C::chr7_1:up	58.0876	79.2559	74.1737
YGL096W::chr7_1:up	585.617	506.247	506.467
YGL101W::chr7_2:up	297.551	268.479	274.674
YGL104C::chr7_2:up	61.6439	45.5722	68.3789
YGL105W::chr7_2:up	96.0223	43.5908	10.4307
YGL107C::chr7_2:up	4.74184	16.8419	9.27171
YGL108C::chr7_2:up	426.766	279.377	248.018
YGL109W::chr7_2:up	269.1	307.117	209.772
YGL110C::chr7_2:up	109.062	111.949	158.778
YGL114W::chr7_2:up	335.485	182.289	227.157
YGL115W::chr7_2:up	602.214	436.898	425.34
YGL117W::chr7_2:up	151.739	89.1629	70.6968
YGL118C::chr7_2:up	37.9347	21.7954	6.95378
YGL121C::chr7_2:up	731.429	708.35	716.24
YGL124C::chr7_2:up	141.07	128.791	96.194
YGL125W::chr7_2:up	292.809	151.577	180.798
YGL126W::chr7_2:up	391.202	238.758	460.109
YGL127C::chr7_2:up	104.321	47.5536	45.1996
YGL131C::chr7_2:up	535.828	354.67	402.16
YGL132W::chr7_2:up	175.448	138.698	128.645
YGL133W::chr7_2:up	181.375	181.298	175.004
YGL135W::chr7_2:up	205.085	87.1815	32.451
YGL136C::chr7_2:up	315.332	347.735	164.573
YGL138C::chr7_2:up	285.696	227.861	270.039
YGL139W::chr7_2:up	612.883	497.331	511.103
YGL140C::chr7_2:up	749.211	502.284	406.796
YGL141W::chr7_2:up	209.827	167.428	178.48
YGL143C::chr7_2:up	260.801	152.568	75.3326
YGL144C::chr7_2:up	202.714	105.014	135.599
YGL146C::chr7_2:up	216.939	173.372	215.567
YGL147C::chr7_2:up	2095.89	1424.63	1171.71
YGL148W::chr7_2:up	253.689	150.586	75.3326
YGL149W::chr7_2:up	142.255	143.651	122.85
YGL151W::chr7_2:up	260.801	170.4	134.44
YGL152C::chr7_2:up	309.405	305.135	272.356
YGL153W::chr7_2:up	296.365	244.703	343.053
YGL154C::chr7_2:up	753.953	508.229	723.193
YGL156W::chr7_2:up	1219.84	1015.47	1087.11
YGL157W::chr7_2:up	315.332	246.684	374.345
YGL158W::chr7_2:up	176.634	340.801	462.427
YGL159W::chr7_2:up	235.907	298.2	250.336
YGL160W::chr7_2:up	387.646	335.847	365.074
YGL161C::chr7_2:up	723.131	593.429	479.811
YGL162W::chr7_2:up	516.861	288.293	348.848
YGL163C::chr7_2:up	254.874	199.131	112.419
YGL164C::chr7_2:up	247.761	223.898	149.506
YGL165C::chr7_2:up	657.931	517.145	550.508
YGL166W::chr7_2:up	654.374	429.963	553.985
YGL167C::chr7_2:up	193.23	131.763	169.209
YGL168W::chr7_2:up	730.244	509.219	338.417
YGL170C::chr7_2:up	541.755	464.638	523.852
YGL175C::chr7_2:up	109.062	96.0978	164.573
YGL176C::chr7_2:up	616.439	525.071	489.083
YGL177W::chr7_2:up	493.152	489.405	501.831
YGL179C::chr7_2:up	697.051	548.847	643.225
YGL180W::chr7_2:up	405.427	426.001	608.456
YGL181W::chr7_2:up	807.299	674.666	706.968
YGL194C::chr7_3:up	146.997	229.842	163.414
YGL195W::chr7_3:up	50.9748	43.5908	11.5896
YGL196W::chr7_3:up	4.74184	17.8326	12.7486
YGL197W::chr7_3:up	17.7819	62.414	18.5434
YGL198W::chr7_3:up	8.29822	17.8326	6.95378
YGL199C::chr7_3/chr00_12:up	10.6691	46.5629	24.3382
YGL200C::chr7_3:up	16.5964	64.3954	49.8354
YGL202W::chr7_3:up	22.5237	50.5257	25.4972
YGL203C::chr7_3:up	122.102	87.1815	137.917
YGL205W::chr7_3:up	264.358	299.191	203.978
YGL206C::chr7_3:up	2.37092	13.8698	9.27171
YGL208W::chr7_3:up	16.5964	88.1722	64.902
YGL209W::chr7_3:up	100.764	250.647	214.408
YGL210W::chr7_3:up	1047.95	1504.87	1349.03
YGL211W::chr7_3:up	13.0401	18.8233	9.27171
YGL212W::chr7_3:up	20.1528	19.814	3.47689
YGL213C::chr7_3:up	133.957	176.344	158.778
YGL214W::chr7_3/chr00_12:up	10.6691	25.7582	12.7486
YGL215W::chr7_3:up	139.884	384.391	239.905
YGL216W::chr7_3:up	296.365	521.108	460.109
YGL217C::chr7_3/chr00_12:up	151.739	476.526	274.674
YGL218W::chr7_3/chr00_12:up	64.0149	61.4233	42.8817
YGL219C::chr00_14:up	30.822	42.6001	41.7227
YGL220W::chr7_3:up	196.786	317.024	274.674
YGL221C::chr7_3:up	22.5237	44.5815	76.4916
YGL222C::chr7_3:up	474.184	544.885	478.652
YGL223C::chr7_3:up	45.0475	47.5536	30.1331
YGL224C::chr7_3:up	162.408	210.028	283.946
YGL226C-A::chr7_3:up	43.862	93.1257	105.466
YGL227W::chr7_3:up	68.7567	127.8	134.44
YGL228W::chr7_3:up	15.411	87.1815	64.902
YGL229C::chr7_3:up	77.0549	212.01	114.737
YGL230C::chr7_3:up	252.503	222.907	337.258
YGL231C::chr7_3:up	175.448	209.038	199.342
YGL232W::chr7_3:up	1973.79	2897.79	2498.73
YGL234W::chr7_3:up	4.74184	12.8791	23.1793
YGL235W::chr7_3/chr00_12:up	66.3858	201.112	134.44
YGL236C::chr7_3:up	161.223	483.461	297.854
YGL241W::chr7_3:up	16.5964	47.5536	46.3585
YGL242C::chr7_3:up	305.849	396.28	324.51
YGL243W::chr7_3:up	35.5638	167.428	93.8761
YGL248W::chr7_3:up	27.2656	50.5257	74.1737
YGL249W::chr7_3:up	36.7493	82.228	76.4916
YGL250W::chr7_3:up	205.085	287.303	261.926
YGL251C::chr7_3:up	1043.21	2070.56	2164.94
YGL252C::chr7_3:up	13.0401	36.6559	22.0203
YGL253W::chr7_3:up	125.659	145.633	141.394
YGL254W::chr7_3:up	307.034	307.117	322.192
YGL255W::chr7_3:up	69.9422	131.763	105.466
YGL256W::chr7_3:up	1921.63	1807.04	1855.5
YGL257C::chr7_3:up	88.9095	202.103	191.229
YGL258W::chr7_3:up	126.844	203.093	249.177
YGL259W::chr7_3:up	2853.4	3042.44	2939.13
YGL260W::chr7_3:up	317.703	285.321	332.623
YGL261C::chr7_3:up	97.2078	146.623	173.845
YGL262W::chr7_3:up	56.9021	117.893	68.3789
YGL263W::chr7_3:up	81.7968	209.038	151.824
YGR001C::chr7_3:up	35.5638	57.4605	38.2458
YGR003W::chr7_3:up	84.1677	105.014	101.989
YGR004W::chr7_3:up	114.99	61.4233	53.3123
YGR006W::chr7_3:up	13.0401	21.7954	31.292
YGR007W::chr7_3:up	200.343	213.991	257.29
YGR008C::chr7_3:up	237.092	349.717	376.663
YGR010W::chr7_3:up	5.9273	14.8605	15.0665
YGR011W::chr7_3/chr00_12:up	184.932	316.033	274.674
YGR012W::chr7_3:up	1232.88	1261.16	1183.3
YGR014W::chr7_3:up	104.321	182.289	148.347
YGR015C::chr7_3:up	478.926	475.536	548.19
YGR016W::chr7_3:up	0	6.93489	18.5434
YGR017W::chr7_3:up	261.987	505.257	424.181
YGR018C::chr7_3/chr00_12:up	220.496	241.731	177.321
YGR019W::chr7_3:up	123.288	180.307	200.501
YGR020C::chr7_3:up	58.0876	22.7861	38.2458
YGR021W::chr7_3:up	452.846	433.926	412.591
YGR022C::chr7_3/chr00_12:up	450.475	562.717	704.65
YGR023W::chr7_3:up	226.423	166.437	206.296
YGR025W::chr7_3/chr00_12:up	444.548	624.14	541.236
YGR026W::chr7_3:up	99.5787	360.614	206.296
YGR027C::chr7_4:up	739.727	419.066	352.325
YGR028W::chr00_14:up	745.655	637.02	744.055
YGR031W::chr7_4:up	1196.13	1133.36	1260.95
YGR032W::chr00_14:up	412.54	365.568	338.417
YGR033C::chr7_4:up	810.855	602.345	626.999
YGR034W::chr7_4:up	1552.95	1265.12	1070.88
YGR035C::chr7_4:up	501.45	417.084	715.081
YGR036C::chr7_4:up	56.9021	34.6745	28.9741
YGR037C::chr7_4:up	246.576	167.428	113.578
YGR038W::chr00_14:up	595.101	433.926	522.693
YGR039W::chr7_4:up	502.635	474.545	518.057
YGR040W::chr00_14:up	487.224	398.261	368.55
YGR041W::chr7_4:up	499.079	380.428	556.303
YGR042W::chr7_4:up	685.196	699.434	588.754
YGR043C::chr7_4:up	752.767	715.285	647.861
YGR044C::chr7_4:up	2449.16	2148.83	2276.2
YGR045C::chr7_4:up	1095.37	993.671	1139.26
YGR049W::chr7_4:up	1549.4	1109.58	1236.61
YGR050C::chr00_14:up	489.595	433.926	478.652
YGR051C::chr7_4:up	1391.73	1227.48	1383.8
YGR052W::chr7_4:up	1691.65	1463.26	1781.33
YGR053C::chr00_14:up	716.018	643.954	599.184
YGR054W::chr7_4:up	841.677	833.178	786.936
YGR055W::chr7_4:up	464.701	446.805	402.16
YGR056W::chr7_4:up	69.9422	59.4419	86.9223
YGR057C::chr7_4:up	2073.37	1377.07	1056.97
YGR058W::chr7_4:up	697.051	599.373	661.768
YGR059W::chr7_4:up	539.385	415.103	446.201
YGR061C::chr7_4:up	270.285	198.14	132.122
YGR063C::chr00_14:up	455.217	353.68	282.787
YGR064W::chr7_4:up	706.534	479.498	316.397
YGR066C::chr7_4:up	1192.57	991.69	1155.49
YGR067C::chr7_4:up	711.276	816.336	900.515
YGR068C::chr7_4:up	486.039	367.549	366.233
YGR069W::chr7_4:up	609.327	540.922	593.389
YGR070W::chr7_4:up	228.794	176.344	144.87
YGR071C::chr7_4:up	1967.86	1617.81	2001.53
YGR072W::chr7_4:up	491.966	450.768	417.227
YGR076C::chr7_4:up	13.0401	11.8884	12.7486
YGR077C::chr7_4:up	2334.17	1937.81	2326.04
YGR078C::chr7_4:up	842.862	480.489	299.013
YGR079W::chr7_4:up	2329.43	1988.33	3017.94
YGR080W::chr7_4:up	1415.44	1164.07	1350.19
YGR081C::chr7_4:up	472.999	397.27	202.819
YGR084C::chr7_4:up	423.209	408.168	454.314
YGR085C::chr7_4:up	643.705	428.973	518.057
YGR086C::chr00_14:up	582.061	450.768	504.149
YGR087C::chr7_4:up	733.8	864.88	934.125
YGR088W::chr7_4:up	1501.98	1016.46	1785.96
YGR089W::chr00_14:up	590.359	450.768	378.981
YGR092W::chr00_14:up	15.411	10.8977	47.5175
YGR093W::chr00_14:up	354.453	336.838	344.212
YGR096W::chr7_4:up	490.781	509.219	573.687
YGR097W::chr7_4:up	996.972	744.015	702.332
YGR100W::chr7_4:up	2931.64	2191.43	2699.23
YGR101W::chr7_4:up	612.883	523.089	329.146
YGR102C::chr7_4:up	327.187	339.81	296.695
YGR104C::chr7_4:up	106.691	36.6559	55.6303
YGR105W::chr7_4:up	48.6039	40.6187	19.7024
YGR106C::chr00_14:up	450.475	353.68	589.913
YGR107W::chr7_4:up	2468.13	2383.62	2149.88
YGR108W::chr7_4:up	1791.23	1851.62	1613.28
YGR109C::chr7_4:up	849.975	733.117	979.324
YGR110W::chr00_14:up	483.668	387.363	384.776
YGR111W::chr7_4:up	893.837	768.783	981.642
YGR112W::chr7_4:up	156.481	298.2	217.885
YGR117C::chr00_14:up	2714.7	2534.21	2612.3
YGR118W::chr7_4:up	200.343	293.247	142.553
YGR121C::chr7_4:up	14.2255	38.6373	20.8613
YGR122C-A::chr00_17a:up	73.4985	170.4	168.05
YGR122W::chr7_4:up	26.0801	82.228	74.1737
YGR123C::chr7_5:up	175.448	264.517	217.885
YGR124W::chr7_5:up	567.836	414.112	453.155
YGR125W::chr7_5:up	408.984	350.707	300.172
YGR126W::chr7_5:up	408.984	260.554	396.366
YGR127W::chr7_5:up	385.275	451.759	412.591
YGR129W::chr7_5:up	358.009	309.098	303.648
YGR130C::chr7_5:up	259.616	263.526	232.952
YGR131W::chr7_5:up	200.343	277.396	285.105
YGR132C::chr7_5:up	169.521	100.061	118.214
YGR133W::chr7_5:up	808.484	501.294	502.99
YGR134W::chr00_8:up	1193.76	774.727	847.202
YGR135W::chr7_5:up	563.094	461.666	363.915
YGR136W::chr7_5:up	260.801	342.782	257.29
YGR137W::chr7_5:up	372.235	324.949	253.813
YGR138C::chr7_5:up	246.576	102.042	152.983
YGR139W::chr7_5:up	815.597	737.08	710.445
YGR141W::chr7_5:up	366.307	314.052	322.192
YGR142W::chr7_5:up	20.1528	65.3861	47.5175
YGR143W::chr7_5:up	483.668	460.675	531.964
YGR144W::chr7_5:up	56.9021	123.837	106.625
YGR146C::chr7_5:up	225.237	238.758	222.521
YGR148C::chr7_5:up	755.138	387.363	350.007
YGR149W::chr7_5:up	314.147	241.731	216.726
YGR150C::chr7_5:up	24.8947	50.5257	67.2199
YGR151C::chr7_5:up	906.877	880.732	1102.17
YGR152C::chr7_5:up	103.135	130.772	70.6968
YGR153W::chr7_5:up	16.5964	41.6094	37.0868
YGR154C::chr7_5:up	326.002	260.554	289.741
YGR155W::chr00_11:up	48.6039	39.628	50.9944
YGR157W::chr7_5:up	207.456	263.526	239.905
YGR159C::chr7_5:up	39.1202	28.7303	9.27171
YGR160W::chr7_5:up	100.764	76.2838	41.7227
YGR161C::chr7_5:up	462.33	537.95	587.595
YGR162W::chr00_17a:up	995.787	789.587	487.924
YGR163W::chr7_5:up	144.626	59.4419	20.8613
YGR164W::chr7_5:up	104.321	183.279	172.686
YGR165W::chr7_5:up	162.408	217.954	126.327
YGR166W::chr7_5:up	80.6113	87.1815	88.0812
YGR167W::chr7_5:up	27.2656	24.7675	24.3382
YGR168C::chr7_5:up	1119.07	751.941	1030.32
YGR169C::chr7_5:up	302.292	488.415	425.34
YGR170W::chr7_5:up	552.425	339.81	489.083
YGR171C::chr7_5:up	290.438	267.489	224.839
YGR173W::chr7_5:up	329.558	375.475	442.724
YGR174C::chr7_5:up	131.586	253.619	136.758
YGR176W::chr7_5:up	378.162	334.856	388.253
YGR177C::chr7_5:up	451.66	315.042	337.258
YGR178C::chr7_5:up	288.067	465.629	383.617
YGR180C::chr7_5:up	39.1202	23.7768	40.5637
YGR181W::chr7_5:up	424.395	396.28	435.77
YGR182C::chr7_5:up	1071.66	1068.96	901.674
YGR183C::chr7_5:up	54.5312	41.6094	52.1534
YGR184C::chr7_5:up	227.608	218.945	129.804
YGR187C::chr7_5:up	239.463	389.345	274.674
YGR188C::chr00_10:up	22.5237	1.9814	17.3845
YGR189C::chr7_5:up	499.079	438.88	427.658
YGR192C::chr7_5:up	1606.3	1275.03	1149.69
YGR193C::chr7_5:up	41.4911	112.94	98.5119
YGR194C::chr7_5:up	271.47	334.856	392.889
YGR196C::chr7_5:up	343.784	289.284	236.429
YGR197C::chr7_5:up	529.901	336.838	407.955
YGR199W::chr7_5:up	381.718	354.67	497.195
YGR200C::chr7_5:up	470.628	284.331	195.865
YGR201C::chr00_10:up	114.99	74.3024	113.578
YGR202C::chr7_5:up	803.742	640.982	549.349
YGR203W::chr7_5:up	152.924	214.982	173.845
YGR204W::chr00_10:up	541.755	378.447	281.628
YGR205W::chr7_5:up	468.257	358.633	402.16
YGR206W::chr7_5:up	970.892	712.313	827.5
YGR207C::chr7_5:up	308.22	299.191	184.275
YGR208W::chr7_5:up	222.867	142.661	137.917
YGR209C::chr7_5:up	478.926	497.331	528.487
YGR210C::chr00_8:up	840.491	751.941	700.014
YGR212W::chr7_5:up	420.838	463.647	467.062
YGR213C::chr7_5:up	467.071	446.805	390.571
YGR214W::chr7_5:up	429.137	591.447	432.293
YGR215W::chr7_5:up	436.249	335.847	303.648
YGR217W::chr7_5:up	75.8695	105.014	97.353
YGR219W::chr00_2:up	26.0801	38.6373	3.47689
YGR220C::chr00_2:up	122.102	203.093	121.691
YGR221C::chr00_2:up	1845.76	1618.8	1612.12
YGR222W::chr00_2:up	414.911	364.577	231.793
YGR223C::chr00_2:up	111.433	88.1722	183.116
YGR224W::chr00_2:up	1034.91	890.639	1133.47
YGR225W::chr00_2:up	1193.76	843.085	1118.4
YGR226C::chr00_2:up	360.38	545.875	486.765
YGR227W::chr00_2:up	1244.73	976.829	1106.81
YGR228W::chr00_2:up	943.627	945.127	950.35
YGR229C::chr00_2:up	625.923	511.201	309.443
YGR230W::chr00_2:up	24.8947	35.6652	23.1793
YGR231C::chr00_2:up	546.497	565.689	436.929
YGR232W::chr00_2:up	430.322	849.029	800.844
YGR233C::chr00_2:up	612.883	714.294	599.184
YGR234W::chr00_2:up	1346.68	1197.76	1349.03
YGR235C::chr00_2:up	205.085	439.87	370.868
YGR236C::chr00_2:up	582.061	495.35	491.401
YGR237C::chr00_2:up	845.233	1181.9	1273.7
YGR238C::chr00_14:up	270.285	140.679	214.408
YGR239C::chr00_14:up	7.11276	20.8047	9.27171
YGR240C::chr00_2:up	17.7819	39.628	25.4972
YGR241C::chr00_2:up	1251.85	971.876	826.341
YGR242W::chr00_2:up	1810.2	1811.99	1513.61
YGR243W::chr00_2:up	922.288	1028.35	996.709
YGR244C::chr00_2:up	64.0149	73.3117	48.6765
YGR247W::chr00_2:up	341.413	633.057	557.462
YGR248W::chr00_14:up	599.843	627.113	573.687
YGR249W::chr00_2:up	1670.31	1336.45	1359.46
YGR250C::chr00_14:up	385.275	426.001	399.842
YGR252W::chr00_17a:up	105.506	76.2838	67.2199
YGR254W::chr00_17a:up	673.342	550.829	693.06
YGR255C::chr00_17a:up	18.9674	13.8698	16.2255
YGR256W::chr00_3:up	232.35	281.359	238.747
YGR257C::chr00_17a:up	75.8695	151.577	76.4916
YGR258C::chr00_17a:up	732.615	572.624	624.681
YGR259C::chr00_3:up	806.113	616.215	1069.72
YGR260W::chr00_3:up	164.779	247.675	231.793
YGR261C::chr00_3:up	404.242	152.568	220.203
YGR262C::chr00_3:up	26.0801	62.414	17.3845
YGR263C::chr00_3:up	152.924	144.642	171.527
YGR266W::chr00_3:up	630.665	396.28	535.441
YGR268C::chr00_3:up	303.478	228.851	207.455
YGR269W::chr00_3:up	253.689	301.173	315.238
YGR270W::chr00_3:up	1401.21	1135.34	1121.88
YGR271W::chr00_17a:up	245.39	197.149	176.162
YGR273C::chr00_17a:up	918.732	657.824	631.635
YGR275W::chr00_3:up	107.877	165.447	93.8761
YGR276C::chr00_17a:up	144.626	227.861	227.157
YGR279C::chr00_3:up	4266.47	3416.92	3344.77
YGR281W::chr00_3:up	457.588	476.526	582.959
YGR282C::chr00_3:up	323.631	227.861	202.819
YGR283C::chr00_3:up	330.743	200.121	190.07
YGR284C::chr00_3:up	614.069	593.429	555.144
YGR285C::chr00_3:up	9.48368	18.8233	8.11275
YGR286C::chr00_3:up	443.362	459.684	464.744
YGR287C::chr00_3:up	444.548	358.633	339.576
YGR288W::chr00_3:up	225.237	262.535	171.527
YGR289C::chr00_17a:up	386.46	379.438	405.637
YGR290W::chr00_3:up	128.03	141.67	163.414
YGR291C::chr00_17a:up	156.481	314.052	331.464
YGR292W::chr00_17a:up	598.658	516.154	636.271
YGR295C::chr00_17b:up	515.675	769.773	651.338
YHL002W::chr00_10:up	155.295	158.512	169.209
YHL003C::chr8_1:up	1475.9	1073.92	1309.63
YHL005C::chr8_1:up	491.966	638.01	407.955
YHL006C::chr8_1:up	675.712	521.108	739.419
YHL007C::chr8_1:up	437.435	443.833	492.56
YHL008C::chr8_1:up	302.292	284.331	483.288
YHL009C::chr8_1:up	391.202	312.07	478.652
YHL010C::chr8_1:up	256.059	341.791	389.412
YHL011C::chr00_10:up	14.2255	14.8605	8.11275
YHL012W::chr8_1:up	399.5	333.866	389.412
YHL013C::chr8_1:up	558.352	476.526	405.637
YHL014C::chr8_1:up	231.165	339.81	391.73
YHL016C::chr8_1:up	271.47	277.396	265.403
YHL017W::chr8_1:up	81.7968	33.6838	88.0812
YHL019C::chr8_1:up	520.417	662.778	489.083
YHL020C::chr8_1:up	598.658	455.722	419.545
YHL021C::chr8_1:up	346.154	389.345	440.406
YHL022C::chr8_1:up	496.708	719.248	504.149
YHL023C::chr8_1:up	56.9021	123.837	149.506
YHL024W::chr00_8:up	737.356	1721.84	1485.79
YHL026C::chr8_1:up	9.48368	11.8884	15.0665
YHL027W::chr8_1:up	177.819	281.359	270.039
YHL028W::chr8_1:up	168.335	169.41	186.593
YHL029C::chr8_1:up	58.0876	101.051	56.7892
YHL030W::chr8_1:up	123.288	80.2466	98.5119
YHL031C::chr8_1:up	474.184	686.554	407.955
YHL032C::chr8_1:up	136.328	228.851	185.434
YHL033C::chr8_1:up	30.822	50.5257	52.1534
YHL034C::chr8_1:up	1.18546	3.9628	92.7171
YHL035C::chr8_1:up	505.006	445.815	468.221
YHL036W::chr8_1:up	445.733	462.656	577.164
YHL037C::chr8_1:up	423.209	294.238	348.848
YHL038C::chr8_1:up	293.994	571.633	396.366
YHL039W::chr00_10:up	80.6113	120.865	159.937
YHL040C::chr8_1:up	97.2078	228.851	125.168
YHL041W::chr8_1:up	106.691	155.54	149.506
YHL042W::chr8_1:up	1069.29	1101.66	1339.76
YHL043W::chr8_1:up	376.976	320.987	376.663
YHL044W::chr8_1:up	834.564	843.085	701.173
YHL045W::chr8_1:up	1014.75	892.62	1145.06
YHL046C::chr8_1:up	215.754	247.675	285.105
YHL047C::chr8_1:up	802.557	962.96	776.506
YHR001W-A::chr8_1:up	457.588	439.87	483.288
YHR003C::chr00_10:up	641.334	408.168	411.432
YHR004C::chr00_10:up	430.322	456.712	413.75
YHR006W::chr00_10:up	689.938	633.057	779.983
YHR008C::chr00_10:up	486.039	324.949	321.033
YHR009C::chr00_10:up	228.794	160.493	169.209
YHR010W::chr8_1:up	106.691	98.0792	35.9279
YHR011W::chr8_1:up	9.48368	16.8419	9.27171
YHR012W::chr8_1:up	119.732	181.298	232.952
YHR013C::chr8_1:up	75.8695	135.726	103.148
YHR014W::chr8_1:up	52.1603	107.986	73.0147
YHR015W::chr8_1:up	183.746	296.219	149.506
YHR016C::chr00_8:up	478.926	806.429	629.317
YHR017W::chr00_8:up	712.462	592.438	502.99
YHR018C::chr8_1:up	912.805	837.141	1129.99
YHR021C::chr8_1:up	322.445	298.2	78.8095
YHR021W-A::chr00_3:up	278.583	747.978	836.772
YHR022C::chr8_1:up	847.604	1017.45	841.408
YHR028C::chr8_1:up	49.7893	138.698	121.691
YHR029C::chr8_1:up	4.74184	3.9628	15.0665
YHR030C::chr8_1:up	4.74184	17.8326	10.4307
YHR031C::chr8_1:up	655.56	684.573	475.175
YHR032W::chr00_8:up	1044.39	916.397	978.165
YHR033W::chr8_1:up	494.337	442.843	567.892
YHR034C::chr8_1:up	1276.74	1074.91	763.757
YHR035W::chr8_1:up	859.459	667.731	659.45
YHR037W::chr8_1:up	312.962	455.722	334.941
YHR038W::chr8_1:up	36.7493	52.5071	50.9944
YHR039C-B::chr00_3:up	5.9273	12.8791	23.1793
YHR039C::chr8_1:up	75.8695	172.382	59.1072
YHR041C::chr00_10:up	335.485	236.777	76.4916
YHR043C::chr8_1:up	243.019	834.169	309.443
YHR044C::chr8_1:up	679.269	716.275	642.066
YHR045W::chr00_8:up	992.23	1081.84	1034.95
YHR046C::chr8_2:up	490.781	504.266	584.118
YHR047C::chr8_2:up	465.886	490.396	542.395
YHR048W::chr8_2:up	299.922	281.359	332.623
YHR049C-A::chr8_2:up	484.853	406.187	601.502
YHR049W::chr8_2:up	326.002	454.731	381.299
YHR050W::chr8_2:up	3487.62	3632.89	3150.06
YHR051W::chr8_2:up	149.368	449.777	253.813
YHR057C::chr8_2:up	154.11	146.623	169.209
YHR059W::chr00_10:up	408.984	134.735	63.743
YHR060W::chr8_2:up	13.0401	22.7861	16.2255
YHR061C::chr8_2:up	270.285	390.335	378.981
YHR064C::chr00_8:up	67.5712	46.5629	26.6562
YHR066W::chr8_2:up	254.874	148.605	139.076
YHR067W::chr00_10:up	261.987	450.768	372.027
YHR073W::chr8_2:up	404.242	1145.25	1067.41
YHR075C::chr8_2:up	331.929	536.959	497.195
YHR076W::chr8_2:up	177.819	285.321	250.336
YHR077C::chr8_2:up	465.886	436.898	520.375
YHR078W::chr8_2:up	579.69	517.145	601.502
YHR079C-B::chr00_3:up	426.766	457.703	428.817
YHR079C::chr8_2:up	68.7567	122.847	92.7171
YHR080C::chr8_2:up	64.0149	164.456	113.578
YHR081W::chr8_2:up	222.867	215.972	85.7633
YHR082C::chr8_2:up	320.074	250.647	208.613
YHR086W::chr8_2:up	625.923	774.727	795.049
YHR087W::chr8_2:up	931.772	704.387	857.633
YHR091C::chr8_2:up	849.975	1135.34	755.644
YHR092C::chr8_2:up	1239.99	1175.96	878.495
YHR093W::chr8_2:up	523.974	563.708	467.062
YHR094C::chr8_2:up	190.859	275.414	303.648
YHR095W::chr8_2:up	114.99	216.963	296.695
YHR096C::chr8_2:up	205.085	276.405	250.336
YHR097C::chr8_2:up	660.301	503.275	629.317
YHR100C::chr8_2:up	482.482	470.582	394.048
YHR103W::chr8_2:up	669.785	560.736	767.234
YHR104W::chr8_2:up	461.144	426.001	310.602
YHR105W::chr8_2:up	218.125	130.772	141.394
YHR106W::chr8_2:up	634.221	497.331	697.696
YHR108W::chr8_2:up	355.638	573.615	679.153
YHR109W::chr8_2:up	442.177	459.684	381.299
YHR110W::chr8_2:up	737.356	510.21	954.986
YHR111W::chr8_2:up	251.318	165.447	130.963
YHR112C::chr8_2:up	612.883	496.34	427.658
YHR113W::chr8_2:up	116.175	168.419	164.573
YHR114W::chr8_2:up	516.861	404.205	439.247
YHR116W::chr8_2:up	69.9422	146.623	96.194
YHR117W::chr8_2:up	331.929	289.284	302.49
YHR120W::chr8_2:up	26.0801	14.8605	25.4972
YHR121W::chr8_2:up	475.37	577.578	491.401
YHR123W::chr8_2:up	167.15	233.805	136.758
YHR124W::chr8_2:up	77.0549	174.363	142.553
YHR125W::chr8_2:up	42.6766	102.042	74.1737
YHR126C::chr8_2:up	328.373	328.912	289.741
YHR127W::chr00_10:up	35.5638	83.2187	88.0812
YHR129C::chr8_2:up	432.693	250.647	274.674
YHR130C::chr8_2:up	309.405	461.666	382.458
YHR131C::chr00_10:up	458.773	426.991	478.652
YHR132C::chr8_2:up	216.939	213.991	208.613
YHR132W-A::chr00_17b:up	1532.8	1340.42	1643.41
YHR133C::chr8_2:up	209.827	341.791	301.331
YHR134W::chr8_2:up	713.647	513.182	475.175
YHR135C::chr8_2:up	113.804	171.391	151.824
YHR136C::chr8_2:up	987.489	973.857	1149.69
YHR137W::chr8_2:up	598.658	586.494	646.702
YHR138C::chr8_2:up	105.506	251.638	326.828
YHR139C-A::chr8_2:up	609.327	450.768	603.82
YHR139C::chr8_2:up	152.924	220.926	263.085
YHR140W::chr00_8:up	265.543	393.308	381.299
YHR142W::chr8_3:up	175.448	341.791	260.767
YHR143W::chr8_3:up	24.8947	47.5536	33.6099
YHR146W::chr00_15:up	308.22	579.559	361.597
YHR147C::chr8_3:up	74.684	178.326	52.1534
YHR150W::chr8_3:up	18.9674	98.0792	81.1275
YHR151C::chr8_3:up	117.361	181.298	184.275
YHR152W::chr8_3:up	179.005	248.665	283.946
YHR153C::chr8_3:up	39.1202	146.623	117.055
YHR154W::chr8_3:up	24.8947	43.5908	46.3585
YHR155W::chr8_3:up	41.4911	120.865	97.353
YHR156C::chr8_3:up	53.3457	45.5722	111.261
YHR157W::chr8_3:up	35.5638	63.4047	81.1275
YHR158C::chr8_3:up	196.786	332.875	279.31
YHR159W::chr8_3:up	113.804	119.875	178.48
YHR160C::chr8_3:up	8.29822	34.6745	12.7486
YHR161C::chr8_3:up	8.29822	13.8698	42.8817
YHR162W::chr00_8:up	27.2656	91.1443	81.1275
YHR163W::chr8_3:up	81.7968	95.1071	103.148
YHR168W::chr00_8:up	152.924	477.517	363.915
YHR171W::chr00_15:up	183.746	220.926	214.408
YHR176W::chr8_3:up	10.6691	38.6373	27.8151
YHR177W::chr8_3:up	199.157	339.81	300.172
YHR179W::chr8_3:up	73.4985	162.475	168.05
YHR180W::chr00_10:up	35.5638	85.2001	76.4916
[truncated: 6,084 more rows]

## Sheet: ground+NaCl
Strain tag	7 generations	14 generations	21 generations
YAL002W::chr1_1:up	417.074	196.572	842.748
YAL004W::chr1_1:up	832.083	439.078	206.89
YAL005C::chr1_1:up	1272.69	1263.4	834.986
YAL007C::chr1_1:up	1992.87	1970.17	3724.7
YAL008W::chr1_1:up	1539.46	982.368	1779.66
YAL009W::chr1_1:up	1031.53	1304.89	237.266
YAL010C::chr1_1:up	108.191	80.9997	7.4251
YAL011W::chr1_1:up	661.95	549.217	1653.1
YAL012W::chr00_12:up	225.468	178.792	134.327
YAL013W::chr1_1:up	1094.72	1045.59	245.028
YAL014C::chr1_1:up	1897.48	1797.3	2831.32
YAL015C::chr1_1:up	2358.32	2054.63	2789.14
YAL016W::chr00_12:up	54.5086	10.3719	218.028
YAL017W::chr1_1:up	1869.4	2059.07	2012.2
YAL018C::chr1_1:up	1061.68	1503.43	1846.82
YAL019W::chr1_1:up	608.68	618.363	757.36
YAL020C::chr1_1:up	1760.79	1891.14	2515.42
YAL021C::chr1_1:up	220.099	93.3472	93.4887
YAL022C::chr1_1:up	1228.1	1282.66	2274.44
YAL023C::chr1_1:up	5393.05	5917.42	2144.84
YAL024C::chr00_17a:up	48.3145	24.695	0
YAL026C::chr1_1:up	1487.01	1907.94	714.497
YAL027W::chr1_1:up	954.727	1410.09	1815.44
YAL028W::chr1_1:up	1096.78	2064.5	1774.94
YAL029C::chr1_1:up	620.242	825.802	837.348
YAL030W::chr1_1:up	1002.63	773.942	1164.73
YAL031C::chr1_1:up	1101.74	1153.26	924.424
YAL034C::chr1_1:up	1029.06	452.413	810.348
YAL035W::chr1_1:up	12.8013	25.1889	0
YAL036C::chr1_1:up	2042.42	1703.46	2535
YAL037W::chr1_1:up	559.539	560.577	525.157
YAL040C::chr1_1:up	92.9125	46.9205	135.002
YAL042W::chr1_1:up	1219.01	989.777	1159.33
YAL043C-A::chr1_1:up	374.953	275.103	276.079
YAL044C::chr1_1:up	1038.55	953.722	301.054
YAL045C::chr1_1:up	825.889	642.565	789.76
YAL046C::chr1_1:up	1218.6	1264.39	1225.48
YAL047C::chr00_12:up	14.866	15.3109	7.4251
YAL048C::chr1_1:up	772.206	467.23	617.633
YAL049C::chr1_1:up	1037.32	1264.39	1755.36
YAL051W::chr1_1:up	1257.42	1518.74	2798.25
YAL053W::chr1_1:up	1643.93	922.606	694.584
YAL054C::chr00_12:up	384.451	453.895	292.954
YAL055W::chr1_1:up	863.879	548.723	462.718
YAL056W::chr1_1:up	1994.93	429.2	790.435
YAL058C-A::chr00_12:up	3314.29	4433.25	2319.33
YAL058W::chr1_1:up	5366.21	7850.55	4394.64
YAL059W::chr1_1:up	319.206	231.145	336.829
YAL060W::chr1_1:up	1302.01	1548.38	1893.74
YAL061W::chr1_1:up	1333.4	1428.36	1333.14
YAL062W::chr1_1:up	977.439	1236.73	1551.84
YAL064C-A::chr00_1:up	706.961	1110.29	1309.18
YAL065C::chr1_1:up	437.308	302.267	323.329
YAL066W::chr1_1:up	872.551	1009.53	1276.1
YAL067C::chr1_1:up	391.884	175.829	278.779
YAL068C::chr1_1:up	1211.58	1077.2	1435.07
YAR002C-A::chr00_16a:up	626.849	405.986	958.175
YAR002W::chr1_1:up	649.974	317.084	264.266
YAR003W::chr1_1:up	1532.02	1468.86	1482.99
YAR014C::chr1_1:up	2264.59	1857.07	1180.25
YAR015W::chr1_1:up	396.426	204.475	64.8008
YAR018C::chr1_1:up	1029.47	369.438	260.891
YAR020C::chr1_1:up	886.178	288.438	523.132
YAR023C::chr1_1:up	1075.72	1886.7	1768.19
YAR027W::chr1_1:up	1013.78	738.381	1067.53
YAR028W::chr1_1:up	1849.99	1362.18	1492.78
YAR029W::chr1_1:up	1980.48	2604.83	2907.6
YAR030C::chr1_1:up	1681.1	1940.04	2650.08
YAR031W::chr1_1:up	744.951	403.023	763.097
YAR035W::chr1_1:up	1821.08	1208.57	1568.38
YAR037W::chr1_1:up	1850.82	1208.08	2614.65
YAR040C::chr1_1:up	1711.65	2127.23	2975.78
YAR042W::chr1_1:up	889.482	597.62	558.232
YAR043C::chr1_1:up	530.633	289.426	266.966
YAR044W::chr1_1:up	57.3993	123.475	39.488
YAR047C::chr1_1:up	1797.13	1597.77	2562
YAR050W::chr00_12:up	190.367	107.176	77.2885
YBL001C::chr2_1:up	229.597	276.584	435.718
YBL002W::chr2_1:up	315.902	150.146	344.254
YBL003C::chr2_1:up	91.6736	35.5608	43.5381
YBL005W::chr2_1:up	313.838	356.102	369.905
YBL006C::chr2_1:up	341.505	84.9509	185.965
YBL007C::chr2_1:up	133.794	55.8108	24.3003
YBL008W::chr2_1:up	7.02005	78.5302	95.8512
YBL009W::chr2_1:up	144.53	118.536	190.352
YBL010C::chr2_1:up	693.333	370.425	893.374
YBL011W::chr2_1:up	245.289	164.469	234.228
YBL012C::chr2_1:up	192.019	81.4936	92.4762
YBL013W::chr2_1:up	303.927	397.59	324.679
YBL015W::chr2_1:up	158.984	190.152	518.407
YBL017C::chr2_1:up	203.994	163.481	285.866
YBL019W::chr2_1:up	177.153	138.786	126.902
YBL021C::chr2_1:up	194.91	184.225	73.5759
YBL022C::chr2_1:up	181.695	61.2437	133.314
YBL024W::chr2_1:up	298.559	201.018	235.916
YBL027W::chr2_1:up	307.643	480.071	56.0257
YBL028C::chr2_1:up	444.328	209.414	597.045
YBL029W::chr2_1:up	146.595	211.389	159.64
YBL031W::chr2_1:up	831.67	723.564	985.513
YBL032W::chr2_1:up	23.1249	73.5912	60.0758
YBL033C::chr2_1:up	5.78122	0	0
YBL036C::chr2_1:up	356.784	255.84	499.844
YBL037W::chr2_1:up	986.111	926.063	950.075
YBL039C::chr2_1:up	496.772	250.901	265.953
YBL043W::chr2_1:up	401.382	275.103	316.242
YBL044W::chr2_1:up	1101.32	840.125	911.599
YBL046W::chr2_1:up	127.6	74.0851	60.4133
YBL047C::chr2_1:up	19.8213	76.5546	171.452
YBL048W::chr2_1:up	181.283	192.621	270.003
YBL049W::chr2_1:up	528.569	412.901	617.97
YBL051C::chr2_1:up	182.108	40.9937	152.889
YBL052C::chr2_1:up	50.7921	85.9387	114.076
YBL053W::chr2_1:up	145.769	143.231	225.453
YBL054W::chr2_1:up	241.572	341.285	517.394
YBL055C::chr2_1:up	218.448	90.8777	177.527
YBL056W::chr2_1:up	186.651	140.268	167.065
YBL057C::chr2_1:up	1996.17	1863.49	1905.21
YBL059W::chr2_1:up	180.457	163.975	205.878
YBL060W::chr2_1:up	141.64	83.4692	119.814
YBL061C::chr2_1:up	313.425	261.273	464.406
YBL062W::chr2_1:up	589.684	555.144	415.468
YBL063W::chr2_1:up	347.699	466.242	494.781
YBL064C::chr2_1:up	80.5241	36.0547	139.727
YBL065W::chr2_1:up	213.492	80.9997	218.365
YBL066C::chr2_1:up	334.072	192.621	391.843
YBL067C::chr2_1:up	162.7	130.39	193.39
YBL068W::chr2_1:up	280.389	139.774	239.628
YBL069W::chr2_1:up	340.679	203.487	257.516
YBL070C::chr2_1:up	194.084	279.548	251.441
YBL071C::chr2_1:up	377.018	383.761	222.753
YBL072C::chr2_1:up	3604.18	2433.45	588.945
YBL075C::chr2_1:up	193.258	179.286	230.178
YBL078C::chr2_1:up	539.718	339.804	415.468
YBL079W::chr2_1:up	1723.63	830.247	222.078
YBL080C::chr2_1:up	0	0	7.4251
YBL081W::chr2_1:up	185.825	97.2984	121.502
YBL082C::chr2_1:up	403.859	743.32	337.167
YBL083C::chr2_1:up	325.4	264.237	198.115
YBL085W::chr2_1:up	257.264	167.432	216.34
YBL086C::chr2_1:up	243.637	262.261	570.045
YBL087C::chr2_1:up	4232.27	3884.03	1239.65
YBL088C::chr2_1:up	117.689	204.969	210.94
YBL089W::chr2_1:up	2902.17	2694.72	1068.2
YBL091C-A::chr00_1:up	310.947	170.89	271.691
YBL091C::chr2_1:up	763.534	852.966	708.422
YBL094C::chr2_1:up	2729.56	2611.25	2892.75
YBL095W::chr2_2:up	1076.96	520.571	887.974
YBL096C::chr2_2:up	1217.77	1020.89	1268.34
YBL098W::chr2_2:up	1452.74	1065.84	1896.1
YBL099W::chr2_2:up	1592.31	790.241	83.0261
YBL100C::chr2_2:up	1461	1190.3	149.514
YBL102W::chr2_2:up	742.061	615.894	1103.3
YBL103C::chr2_2:up	806.48	880.625	1478.94
YBL104C::chr2_2:up	652.865	808.021	525.157
YBL106C::chr2_2:up	1478.34	814.442	711.797
YBL107C::chr2_2:up	1212.82	693.436	1009.48
YBR001C::chr2_2:up	1563.82	1108.31	1371.96
YBR003W::chr2_2:up	1252.05	1470.34	703.022
YBR005W::chr2_2:up	954.727	502.297	1037.49
YBR006W::chr2_2:up	1739.32	1674.32	4577.57
YBR007C::chr2_2:up	1564.65	1107.82	1310.19
YBR008C::chr2_2:up	750.733	650.961	716.184
YBR009C::chr2_2:up	702.831	523.535	952.437
YBR010W::chr2_2:up	557.475	940.387	1400.64
YBR012C::chr2_2:up	1840.91	1576.04	1985.88
YBR013C::chr2_2:up	1801.68	965.575	1182.95
YBR014C::chr2_2:up	1749.64	1808.66	2192.77
YBR015C::chr2_2:up	1461.41	857.411	4.72506
YBR016W::chr2_2:up	2578.42	3244.43	2940
YBR018C::chr2_2:up	766.425	408.95	982.138
YBR019C::chr2_2:up	388.994	261.273	400.618
YBR020W::chr00_18:up	168.894	68.1583	161.327
YBR020W::chr2_2:up	272.13	176.322	251.778
YBR021W::chr2_2:up	399.73	176.322	688.171
YBR022W::chr2_2:up	647.084	570.455	993.613
YBR023C::chr2_2:up	366.282	635.156	734.747
YBR024W::chr2_2:up	698.289	422.779	563.632
YBR025C::chr2_2:up	721.414	331.901	319.617
YBR026C::chr2_2:up	1455.63	1255	480.944
YBR027C::chr2_2:up	531.872	338.322	851.186
YBR028C::chr2_2:up	446.393	853.46	554.182
YBR030W::chr2_2:up	502.553	357.584	641.933
YBR031W::chr2_2:up	554.997	305.231	345.942
YBR032W::chr2_2:up	584.729	364.992	663.871
YBR033W::chr2_2:up	710.677	570.949	982.475
YBR034C::chr2_2:up	276.673	189.164	221.74
YBR035C::chr2_2:up	800.699	376.846	59.0633
YBR036C::chr2_2:up	656.994	458.34	260.891
YBR037C::chr2_2:up	1755.43	1036.7	314.217
YBR039W::chr2_2:up	5081.28	3589.67	741.835
YBR040W::chr2_2:up	346.46	319.554	327.042
YBR041W::chr2_2:up	557.062	306.712	244.016
YBR042C::chr2_2:up	179.631	336.346	139.389
YBR043C::chr2_2:up	402.208	369.931	513.007
YBR044C::chr2_2:up	3.7165	43.9571	6.41258
YBR045C::chr2_2:up	390.645	458.834	691.546
YBR046C::chr2_2:up	726.369	874.204	1156.63
YBR047W::chr2_2:up	160.635	273.127	336.154
YBR048W::chr2_2:up	1050.94	549.217	188.327
YBR050C::chr2_2:up	723.891	368.45	552.495
YBR051W::chr2_2:up	653.691	330.419	452.931
YBR052C::chr2_2:up	487.274	285.968	384.08
YBR053C::chr2_2:up	313.838	154.591	180.565
YBR054W::chr2_2:up	512.464	439.571	898.099
YBR056W::chr2_2:up	43.7721	372.401	115.764
YBR057C::chr2_2:up	263.045	220.774	320.292
YBR058C::chr2_2:up	317.141	173.853	495.456
YBR059C::chr2_2:up	1326.79	955.204	485.331
YBR061C::chr2_2:up	296.907	361.041	146.814
YBR062C::chr2_2:up	678.88	404.998	490.394
YBR063C::chr2_2:up	353.48	506.248	455.631
YBR064W::chr2_2:up	858.924	645.034	824.861
YBR065C::chr2_2:up	801.112	872.228	1162.7
YBR066C::chr2_2:up	975.374	569.467	519.757
YBR067C::chr2_2:up	246.528	137.304	227.14
YBR068C::chr2_2:up	981.981	1022.87	402.643
YBR069C::chr2_2:up	498.837	321.035	387.455
YBR071W::chr2_2:up	742.887	344.249	679.734
YBR072W::chr2_2:up	745.364	606.016	916.324
YBR073W::chr2_2:up	560.778	299.304	581.182
YBR074W::chr2_2:up	647.084	491.431	794.823
YBR075W::chr2_2:up	346.873	213.365	380.705
YBR076W::chr2_2:up	533.111	269.67	500.181
YBR077C::chr2_2:up	505.031	155.579	122.177
YBR078W::chr2_2:up	3652.08	3253.82	813.385
YBR081C::chr2_3:up	57.8122	39.0181	0
YBR082C::chr2_3:up	68.9617	30.1279	135.677
YBR083W::chr00_16a:up	157.332	71.1217	137.027
YBR084C-A::chr00_16a:up	1631.54	1525.66	614.595
YBR084W::chr2_3:up	1230.57	790.735	667.921
YBR085W::chr2_3:up	418.725	276.584	644.971
YBR086C::chr2_3:up	0	53.8352	0
YBR090C-A::chr2_3:up	372.063	379.316	437.743
YBR090C::chr00_16a:up	280.389	110.634	115.426
YBR092C::chr2_3:up	285.344	424.754	533.257
YBR093C::chr2_3:up	455.478	490.443	630.121
YBR094W::chr2_3:up	552.106	298.316	1.68752
YBR095C::chr2_3:up	423.681	323.999	194.74
YBR097W::chr2_3:up	11.9754	0	0
YBR098W::chr2_3:up	111.082	62.7254	116.101
YBR099C::chr2_3:up	1145.51	649.479	693.571
YBR100W::chr2_3/chr00_16a:up	474.886	399.565	548.445
YBR101C::chr2_3:up	251.896	146.688	333.117
YBR103W::chr2_3:up	348.525	78.5302	306.116
YBR104W::chr2_3:up	236.204	472.169	488.031
YBR105C::chr2_3:up	540.544	472.663	271.016
YBR106W::chr2_3:up	457.955	114.585	534.607
YBR107C::chr2_3:up	154.854	91.3716	82.0136
YBR113W::chr2_3:up	26.8414	49.39	19.2377
YBR115C::chr2_3:up	317.141	246.95	158.29
YBR116C::chr2_3:up	173.024	76.5546	184.615
YBR119W::chr2_3:up	80.5241	22.7194	93.8262
YBR120C::chr2_3:up	479.015	178.792	207.565
YBR125C::chr00_16a:up	220.099	325.48	892.024
YBR126C::chr2_3:up	0	0.4939	7.08759
YBR128C::chr2_3:up	130.903	95.8167	120.827
YBR129C::chr2_3:up	193.671	35.5608	98.2138
YBR130C::chr2_3:up	279.15	175.829	209.253
YBR131W::chr00_16a:up	63.1805	68.6522	28.0129
YBR133C::chr2_3:up	13.2142	12.3475	23.9628
YBR134W::chr2_3:up	2509.05	2256.14	2422.94
YBR137W::chr2_3:up	118.515	102.731	146.477
YBR138C::chr2_3:up	364.217	475.626	336.829
YBR139W::chr2_3:up	289.061	244.975	595.358
YBR141C::chr2_3:up	616.526	611.449	867.386
YBR144C::chr2_3:up	860.576	1065.84	834.648
YBR145W::chr2_3:up	307.643	227.688	292.279
YBR147W::chr2_3:up	541.37	815.43	494.781
YBR148W::chr2_3:up	710.264	535.882	823.511
YBR150C::chr00_16a:up	42.5333	15.8048	93.8262
YBR151W::chr2_3:up	302.688	371.413	603.12
YBR157C::chr2_3:up	245.289	94.335	336.492
YBR158W::chr2_3:up	285.757	346.224	567.682
YBR159W::chr2_3:up	6.60711	3.4573	9.45012
YBR161W::chr2_3:up	189.541	384.255	280.804
YBR162W-A::chr2_3:up	424.92	329.926	293.966
YBR163W::chr2_3:up	892.373	597.62	208.915
YBR164C::chr2_3:up	180.044	97.7923	117.789
YBR165W::chr2_3:up	75.1559	19.2621	119.814
YBR169C::chr00_16a:up	461.672	359.56	411.418
YBR170C::chr2_3:up	523.613	626.76	440.781
YBR171W::chr2_3:up	287.409	157.06	5.73757
YBR172C::chr2_3:up	1622.87	1385.39	1255.18
YBR173C::chr2_4:up	716.045	564.034	58.7258
YBR174C::chr2_4:up	1994.52	1549.86	739.135
YBR175W::chr2_4:up	1611.72	1117.7	808.66
YBR176W::chr2_4:up	395.188	256.828	330.754
YBR177C::chr2_4:up	351.829	241.023	414.118
YBR178W::chr2_4:up	473.647	366.968	360.117
YBR180W::chr2_4:up	1019.56	706.278	845.111
YBR181C::chr2_4:up	821.346	411.913	280.129
YBR182C::chr2_4:up	160.635	341.779	385.092
YBR183W::chr2_4:up	291.539	180.768	185.965
YBR184W::chr2_4:up	2171.26	2872.03	2512.04
YBR185C::chr2_4:up	276.673	293.377	144.789
YBR186W::chr2_4:up	201.104	141.749	174.49
YBR188C::chr2_4:up	321.271	124.463	288.566
YBR189W::chr00_14:up	175.088	85.4448	81.6761
YBR191W::chr00_11:up	47.0756	0	0
YBR194W::chr2_4:up	534.763	463.279	91.4637
YBR195C::chr2_4:up	196.974	100.756	173.477
YBR197C::chr2_4:up	392.71	105.695	194.74
YBR199W::chr2_4:up	934.08	685.534	772.885
YBR200W::chr2_4:up	131.729	69.64	0
YBR203W::chr2_4:up	380.322	547.736	660.158
YBR204C::chr2_4:up	502.553	406.974	411.08
YBR205W::chr2_4:up	648.735	573.912	1015.55
YBR206W::chr2_4:up	334.072	422.285	679.734
YBR207W::chr2_4:up	385.69	476.614	657.121
YBR208C::chr2_4:up	238.269	289.92	284.854
YBR210W::chr2_4:up	502.966	437.102	424.243
YBR212W::chr2_4:up	1409.79	1069.79	1515.73
YBR213W::chr2_4:up	0.825889	6.91461	2.02503
YBR214W::chr2_4:up	780.878	805.552	1082.04
YBR215W::chr2_4:up	6.60711	0	0
YBR216C::chr2_4:up	2665.56	2468.51	2720.96
YBR217W::chr2_4:up	1022.04	496.37	454.281
YBR218C::chr2_4:up	1659.62	768.015	625.396
YBR219C::chr2_4:up	735.041	289.426	492.419
YBR220C::chr2_4:up	855.208	671.705	838.023
YBR221C::chr2_4:up	1394.51	1471.33	475.206
YBR222C::chr2_4:up	790.788	812.96	680.746
YBR223C::chr2_4:up	840.342	577.864	968.975
YBR224W::chr2_4:up	1234.29	971.996	1155.95
YBR225W::chr2_4:up	1143.03	448.462	528.869
YBR226C::chr2_4:up	457.955	442.535	328.729
YBR227C::chr2_4:up	362.978	449.943	649.021
YBR228W::chr2_4:up	297.32	131.871	179.552
YBR229C::chr2_4:up	588.446	639.107	281.141
YBR230C::chr2_4:up	375.366	248.926	495.794
YBR231C::chr2_4:up	185.412	33.5852	140.402
YBR232C::chr00_8:up	380.322	229.664	385.767
YBR233W::chr2_4:up	127.187	97.2984	115.426
YBR235W::chr2_4:up	131.729	80.0119	120.827
YBR238C::chr2_4:up	209.776	88.9021	127.577
YBR239C::chr2_4:up	261.394	283.005	204.528
YBR240C::chr2_4:up	287.822	331.407	295.316
YBR241C::chr2_4:up	769.315	557.614	792.46
YBR242W::chr2_4:up	363.391	472.169	362.817
YBR244W::chr2_4:up	144.943	199.536	245.366
YBR245C::chr2_4:up	265.936	194.597	142.427
YBR246W::chr2_4:up	125.122	123.475	133.314
YBR248C::chr2_4:up	162.287	391.663	375.98
YBR249C::chr2_4:up	49.5533	177.804	26.3253
YBR250W::chr2_4:up	298.559	229.664	357.417
YBR251W::chr2_4:up	1233.88	693.436	183.265
YBR255W::chr2_4:up	45.8368	30.1279	69.5259
YBR258C::chr2_4:up	437.308	150.64	245.366
YBR259W::chr2_4:up	473.647	219.786	449.218
YBR260C::chr2_4:up	209.776	162.493	249.753
YBR261C::chr2_4:up	116.037	101.744	158.29
YBR262C::chr2_4:up	414.183	216.822	244.016
YBR263W::chr2_4:up	123.883	175.829	304.429
YBR264C::chr2_4:up	312.599	265.718	243.003
YBR266C::chr2_4:up	101.584	74.579	34.4254
YBR267W::chr2_4:up	91.2607	114.585	63.1133
YBR268W::chr2_4:up	2291.84	1650.12	304.429
YBR269C::chr00_1:up	139.162	179.286	374.967
YBR270C::chr00_16a:up	716.871	878.649	1207.25
YBR271W::chr00_1:up	369.585	665.778	423.905
YBR272C::chr00_16a:up	596.704	902.356	817.773
YBR273C::chr00_1:up	227.119	77.5424	51.9757
YBR275C::chr00_16a:up	113.56	55.3169	132.639
YBR276C::chr00_16a:up	97.8678	152.121	145.802
YBR277C::chr00_1:up	1815.72	1335.51	3039.23
YBR278W::chr00_1:up	948.533	757.643	867.724
YBR279W::chr00_1:up	9.08477	0	8.77511
YBR280C::chr00_16a:up	1235.53	787.771	443.818
YBR281C::chr00_1:up	216.796	277.572	349.654
YBR282W::chr00_1:up	87.1312	61.7376	29.3629
YBR283C::chr00_1:up	343.983	242.999	105.976
YBR284W::chr00_1:up	436.482	236.084	946.362
YBR285W::chr00_1:up	383.625	558.108	699.647
YBR286W::chr00_1:up	140.814	86.4326	274.729
YBR287W::chr00_16a:up	214.318	280.042	428.968
YBR288C::chr00_16a:up	148.247	87.9143	128.927
YBR289W::chr00_16a:up	34.2744	0.4939	16.8752
YBR290W::chr00_1:up	487.687	653.43	569.032
YBR291C::chr00_1:up	70.6135	85.4448	191.365
YBR292C::chr00_1:up	192.845	364.005	783.01
YBR293W::chr00_1:up	37.5779	467.23	120.152
YBR294W::chr00_16a:up	427.397	410.431	583.208
YBR295W::chr00_1:up	142.053	134.341	409.393
YBR296C::chr00_1:up	468.279	406.48	369.567
YBR297W::chr00_1:up	220.512	328.938	425.255
YBR298C::chr00_1:up	179.218	92.3594	225.79
YBR299W::chr00_17a:up	90.8477	92.8533	65.4758
YBR300C::chr00_1:up	211.427	217.81	604.133
YBR301W::chr00_16a:up	609.506	1211.54	754.66
YCL001W-A::chr00_1:up	163.526	30.1279	368.555
YCL001W::chr3_1:up	1013.37	1214.01	724.959
YCL002C::chr3_1:up	471.582	433.645	432.006
YCL005W::chr3_1:up	272.543	279.054	381.38
YCL006C::chr3_1/chr00_12:up	2317.44	3190.1	2975.44
YCL008C::chr3_1:up	11.1495	24.695	583.545
YCL009C::chr3_1:up	441.024	440.559	684.459
YCL010C::chr3_1:up	906.826	766.534	2920.09
YCL011C::chr3_1:up	611.57	654.418	501.869
YCL012W::chr3_1:up	386.103	629.723	943.325
YCL013W::chr3_1:up	575.644	568.973	949.062
YCL014W::chr3_1:up	274.195	129.402	635.183
YCL016C::chr3_1:up	23.9508	21.2377	33.4129
YCL022C::chr00_12:up	54.9216	267.694	257.178
YCL023C::chr3_1/chr00_12:up	910.955	837.161	2794.54
YCL024W::chr3_1:up	27.2543	104.213	156.94
YCL025C::chr3_1:up	199.039	162.987	264.266
YCL026C-A::chr00_16a:up	480.254	619.351	731.034
YCL026C::chr3_1:up	122.232	213.365	317.929
YCL027W::chr3_1:up	157.332	312.639	444.156
YCL028W::chr3_1:up	30.5579	240.036	266.628
YCL029C::chr3_1:up	219.273	186.2	59.0633
YCL033C::chr3_1:up	336.963	180.768	675.684
YCL035C::chr00_11:up	316.728	351.657	317.254
YCL036W::chr3_1:up	377.018	440.559	828.573
YCL037C::chr3_1:up	1303.67	1452.56	1140.76
YCL038C::chr00_12:up	42.5333	368.944	246.716
YCL039W::chr3_1:up	390.645	536.376	433.693
YCL044C::chr3_1:up	149.486	772.954	270.003
YCL045C::chr3_1:up	357.61	407.468	497.481
YCL046W::chr3_1:up	232.488	242.505	387.455
YCL047C::chr3_1:up	529.395	423.273	673.996
YCL048W::chr3_1:up	175.914	410.431	278.779
YCL049C::chr3_1:up	436.482	465.748	618.645
YCL050C::chr3_1:up	989.002	940.387	1090.48
YCL051W::chr3_1:up	676.403	591.693	1009.48
YCL055W::chr3_1:up	150.725	218.798	150.189
YCL056C::chr3_1:up	681.771	615.4	845.111
YCL057W::chr3_1:up	314.664	364.499	274.054
YCL058C::chr00_12:up	236.204	75.5668	60.0758
YCL060C::chr3_1:up	667.318	252.877	524.144
YCL061C::chr3_1:up	21.0602	52.3535	38.813
YCL062W::chr3_1:up	351.003	497.358	182.927
YCL063W::chr3_1:up	222.164	150.146	241.653
YCL064C::chr3_1:up	269.24	309.182	412.43
YCL069W::chr3_1:up	414.183	703.314	817.098
YCL074W::chr00_12:up	657.82	641.083	812.035
YCL075W::chr00_12:up	322.097	767.521	1266.32
YCL076W::chr00_12:up	537.653	577.37	767.147
YCR001W::chr3_1:up	28.0802	217.81	136.352
YCR002C::chr3_1:up	1190.52	995.703	1035.8
YCR003W::chr3_1:up	174.675	215.341	283.166
YCR004C::chr3_1:up	81.35	280.535	179.89
YCR005C::chr3_1:up	463.736	586.754	568.02
YCR006C::chr3_1:up	1.23883	16.2987	3.03754
YCR008W::chr3_1:up	92.9125	24.2011	155.252
YCR009C::chr3_1:up	0	0	96.1887
YCR010C::chr3_1:up	1796.31	2049.69	2339.58
YCR011C::chr3_1:up	4.12944	30.1279	37.8005
YCR014C::chr3_1:up	369.172	200.03	234.903
YCR015C::chr3_1:up	505.444	677.631	508.957
YCR016W::chr3_1:up	492.23	238.06	483.306
YCR017C::chr3_1:up	486.035	925.076	330.079
YCR019W::chr3_1:up	533.937	553.169	1018.59
YCR020C-A::chr3_1:up	118.102	320.541	154.239
YCR020C::chr3_1:up	581.426	698.869	730.697
YCR020W-B::chr00_1:up	97.0419	20.2499	33.4129
YCR021C::chr3_1:up	437.308	284.487	509.969
YCR022C::chr3_1:up	282.041	478.59	511.657
YCR023C::chr3_1:up	339.027	367.462	518.407
YCR024C-A::chr00_1:up	293.19	330.419	646.658
YCR024C::chr00_1:up	1309.86	705.29	568.357
YCR025C::chr00_1:up	56.1604	242.999	169.765
YCR027C::chr00_1:up	377.844	405.492	786.723
YCR028C-A::chr00_16a:up	1185.98	467.23	252.791
YCR028C::chr00_1:up	318.793	124.463	229.165
YCR030C::chr00_16a:up	236.204	155.085	434.368
YCR031C::chr00_1:up	1437.46	763.076	235.916
YCR032W::chr00_16a:up	289.061	472.169	495.794
YCR033W::chr00_16a:up	598.769	547.736	297.341
YCR034W::chr00_1:up	254.374	55.8108	146.477
YCR036W::chr00_1:up	109.843	41.9815	331.429
YCR037C::chr00_1:up	475.299	294.859	310.504
YCR043C::chr00_1:up	962.16	985.331	2131.68
YCR044C::chr00_1:up	161.461	244.481	1.68752
YCR045C::chr00_1:up	246.528	88.9021	375.305
YCR046C::chr00_16a:up	1142.2	1512.82	258.191
YCR047C::chr00_16a:up	18.1695	3.4573	5.40007
YCR048W::chr00_16a:up	478.602	494.888	400.955
YCR049C::chr00_1:up	218.448	84.9509	282.491
YCR050C::chr00_1:up	64.8323	51.3657	200.14
YCR051W::chr00_1:up	367.933	132.859	300.716
YCR053W::chr00_16a:up	34.6873	0	12.8252
YCR059C::chr00_1:up	94.9772	39.512	91.1262
YCR060W::chr00_16a:up	615.7	513.657	675.684
YCR061W::chr00_1:up	85.0665	98.2862	215.328
YCR062W::chr00_16a:up	368.759	337.334	413.78
YCR063W::chr00_1:up	0	16.2987	11.1376
YCR065W::chr00_1:up	793.266	193.115	651.721
YCR066W::chr00_1:up	938.209	1388.35	1316.27
YCR067C::chr00_16a:up	1702.16	2304.54	1997.35
YCR068W::chr00_1:up	103.649	40.4998	209.928
YCR069W::chr00_16a:up	586.381	919.643	813.385
YCR071C::chr00_1:up	36.752	140.762	11.8127
YCR073C::chr00_16a:up	731.737	748.259	1009.81
YCR073W-A::chr00_1:up	0.825889	7.40851	3.71255
YCR075C::chr00_16a:up	691.269	576.382	1371.62
YCR076C::chr00_1:up	893.611	629.723	678.046
YCR077C::chr00_1:up	185.412	83.9631	70.8759
YCR079W::chr00_1:up	516.18	813.454	514.019
YCR081W::chr00_1:up	208.537	113.103	150.527
YCR082W::chr00_1:up	197.8	131.871	779.298
YCR083W::chr00_16a:up	159.396	314.615	333.454
YCR085W::chr00_1:up	315.076	497.358	628.433
YCR086W::chr00_1:up	241.159	281.523	607.17
YCR087C-A::chr00_1:up	36.3391	27.1645	126.564
YCR087W::chr00_1:up	108.604	98.7801	285.529
YCR088W::chr00_16a:up	358.436	362.029	226.465
YCR089W::chr00_16a:up	42.1203	250.408	222.078
YCR090C::chr00_2:up	553.345	570.949	1010.49
YCR091W::chr00_2:up	543.022	646.022	580.17
YCR092C::chr00_2:up	749.907	1018.92	1223.12
YCR094W::chr00_2:up	204.407	199.042	651.721
YCR095C::chr00_14:up	241.985	290.413	393.868
YCR098C::chr00_2:up	320.032	138.292	389.818
YCR099C::chr00_2:up	163.113	300.291	587.258
YCR100C::chr00_2:up	724.717	1156.71	1394.23
YCR101C::chr00_2:up	398.904	606.51	475.881
YCR102C::chr00_2:up	369.998	170.89	308.141
YCR102W-A::chr00_14:up	389.819	309.182	375.642
YCR105W::chr00_2:up	697.463	846.545	850.848
YCR106W::chr00_2:up	808.958	1093.5	1029.05
YCR107W::chr00_17a:up	121.406	55.3169	117.114
YDL001W::chr4_1:up	43.3591	26.6706	53.3257
YDL002C::chr4_1:up	91.2607	63.7132	150.864
YDL006W::chr4_1:up	641.302	555.638	430.993
YDL009C::chr4_1:up	486.861	306.218	512.332
YDL010W::chr4_1:up	212.253	133.847	197.778
YDL011C::chr4_1:up	437.308	441.053	618.308
YDL012C::chr4_1:up	703.244	643.552	540.344
YDL013W::chr4_1:up	9.91066	29.634	48.6006
YDL018C::chr4_1:up	181.695	455.87	857.599
YDL019C::chr4_1:up	11.9754	193.609	67.1634
YDL020C::chr4_1:up	269.24	246.456	606.158
YDL021W::chr4_1:up	448.457	627.254	896.412
YDL022W::chr4_1:up	59.051	35.0669	277.766
YDL023C::chr4_1:up	3197.01	78.0363	15684.8
YDL024C::chr4_1:up	525.265	296.834	490.731
YDL025C::chr4_1:up	186.238	298.81	185.965
YDL026W::chr4_1:up	334.485	581.815	653.071
YDL027C::chr4_1:up	388.168	150.64	616.283
YDL032W::chr4_1:up	810.197	1715.81	538.319
YDL033C::chr4_1:up	555.41	810.985	533.594
YDL034W::chr4_1:up	108.191	92.3594	250.766
YDL036C::chr4_1:up	460.02	635.156	547.432
YDL037C::chr4_1:up	476.125	432.163	1024.33
YDL038C::chr4_1:up	213.079	313.627	132.639
YDL039C::chr4_1:up	557.888	1028.3	996.65
YDL040C::chr4_1:up	1414.33	863.832	386.78
YDL041W::chr4_1:up	135.033	25.6828	15.5252
YDL044C::chr4_1:up	2436.78	1049.54	376.992
YDL046W::chr4_1:up	151.551	243.987	260.553
YDL047W::chr4_1:up	219.686	58.2803	11.1376
YDL049C::chr4_1:up	536.002	654.418	537.982
YDL050C::chr4_1:up	374.128	295.352	388.467
YDL051W::chr4_1:up	669.383	780.363	1140.09
YDL052C::chr4_1:up	492.23	540.327	862.661
YDL053C::chr4_1:up	196.561	155.579	310.841
YDL054C::chr4_1:up	403.034	560.577	388.467
YDL056W::chr4_1:up	794.505	275.103	112.051
YDL057W::chr4_1:up	357.61	197.56	1015.89
YDL059C::chr4_1:up	374.128	164.469	374.63
YDL061C::chr4_1:up	1060.44	1376.5	1260.92
YDL062W::chr4_1:up	658.233	524.028	814.735
YDL063C::chr4_1:up	2264.59	1584.93	2203.9
YDL065C::chr4_1:up	187.89	242.999	123.864
YDL066W::chr4_1:up	129.665	245.962	373.955
YDL067C::chr4_1:up	35.5132	53.8352	48.2631
YDL068W::chr4_1:up	1889.22	2330.22	811.023
YDL069C::chr4_1:up	2515.66	2576.68	942.312
YDL070W::chr4_1:up	220.099	308.688	334.804
YDL071C::chr4_1:up	302.688	302.267	520.094
YDL072C::chr4_1:up	1211.99	1066.83	2476.27
YDL073W::chr4_1:up	161.048	633.674	118.464
YDL074C::chr4_1:up	728.021	932.484	459.343
YDL075W::chr4_1:up	8.25889	0	0
YDL076C::chr4_1:up	986.937	1194.75	1618
YDL077C::chr4_1:up	73.917	46.9205	43.2006
YDL078C::chr4_1:up	3820.97	4595.74	4658.91
YDL079C::chr4_1:up	787.898	958.661	1085.41
YDL080C::chr4_1:up	260.568	591.199	447.531
YDL081C::chr4_1:up	2373.19	1746.43	342.567
YDL082W::chr4_1:up	469.105	375.364	480.944
YDL083C::chr4_1:up	443.915	757.149	139.727
YDL085W::chr4_1:up	184.173	306.712	335.142
YDL086W::chr4_1:up	268.001	610.955	563.97
YDL088C::chr4_1:up	374.953	567.986	479.931
YDL089W::chr4_1:up	796.157	638.119	1396.93
YDL090C::chr4_1:up	24.7767	29.1401	187.652
YDL091C::chr4_1:up	249.418	636.638	687.159
YDL093W::chr4_1:up	472.821	669.729	720.572
YDL094C::chr4_1:up	367.107	428.212	1066.18
YDL095W::chr4_1:up	670.209	871.734	668.596
YDL096C::chr4_2:up	1082.33	1422.43	492.081
YDL099W::chr4_2:up	163.526	182.743	231.528
YDL100C::chr4_2:up	128.013	382.773	49.6131
YDL101C::chr4_2:up	451.761	560.083	601.095
YDL104C::chr4_2:up	274.195	734.924	362.817
YDL106C::chr4_2:up	35.1003	1.4817	82.0136
YDL107W::chr4_2:up	1370.56	1469.35	362.142
YDL109C::chr4_2:up	700.353	634.662	1309.18
YDL110C::chr4_2:up	441.85	425.248	537.307
YDL112W::chr4_2:up	360.913	550.205	623.371
YDL113C::chr4_2:up	240.334	138.292	209.59
YDL114W::chr4_2:up	203.169	415.37	255.491
YDL115C::chr4_2:up	154.854	35.5608	15.5252
YDL116W::chr4_2:up	102.41	48.4022	6.07508
YDL117W::chr4_2:up	283.28	141.749	96.8637
YDL118W::chr4_2:up	6913.93	9874.55	1556.91
YDL119C::chr4_2:up	2408.7	3464.22	713.822
YDL121C::chr4_2:up	315.076	324.987	844.773
YDL122W::chr4_2:up	206.885	276.09	201.153
YDL123W::chr4_2:up	402.208	432.163	473.856
YDL124W::chr4_2:up	289.474	241.517	280.466
YDL125C::chr4_2:up	253.135	184.225	314.217
YDL127W::chr4_2:up	346.46	249.914	189.002
YDL129W::chr4_2:up	282.041	182.743	365.18
YDL130W-A::chr00_2:up	1026.99	1237.71	1972.04
YDL130W::chr4_2:up	1498.16	3105.65	768.497
YDL131W::chr4_2:up	422.855	525.016	666.909
YDL133C-A::chr00_14:up	521.549	579.345	733.059
YDL133W::chr4_2:up	173.437	292.389	581.52
YDL134C-A::chr4_2:up	329.53	935.941	495.456
YDL134C::chr4_2:up	108.604	245.962	486.006
YDL135C::chr4_2:up	479.015	415.37	706.734
YDL136W::chr4_2:up	3117.32	3285.92	1080.69
YDL137W::chr4_2:up	112.321	281.523	343.242
YDL138W::chr4_2:up	231.662	212.871	273.041
YDL142C::chr4_2:up	364.63	427.224	397.243
YDL144C::chr4_2:up	365.869	744.802	575.782
YDL146W::chr4_2:up	21.4731	28.6462	239.966
YDL149W::chr4_2:up	348.938	257.816	329.067
YDL154W::chr4_2:up	2502.86	3220.23	4378.78
YDL155W::chr4_2:up	220.099	503.285	297.679
YDL156W::chr4_2:up	346.873	578.357	668.596
YDL157C::chr4_2:up	140.814	411.913	487.019
YDL160C::chr4_2:up	81.763	107.67	48.2631
YDL161W::chr4_2:up	478.189	570.949	648.683
YDL162C::chr4_2:up	526.917	1062.87	852.198
YDL167C::chr4_2:up	363.391	791.229	497.819
YDL168W::chr4_2:up	335.724	472.663	476.894
YDL169C::chr4_2:up	194.084	433.151	469.469
YDL170W::chr4_2:up	273.782	581.321	564.307
YDL171C::chr4_2:up	409.641	613.918	612.908
YDL172C::chr4_2:up	478.602	517.608	172.465
YDL173W::chr4_2:up	337.375	366.474	153.902
YDL174C::chr4_2:up	148.247	231.639	159.977
YDL176W::chr4_2:up	668.97	750.729	1291.97
YDL177C::chr4_2:up	444.328	474.144	964.587
YDL178W::chr4_2:up	397.665	448.956	468.119
YDL179W::chr4_2:up	451.761	346.224	390.155
YDL180W::chr4_2:up	317.141	312.145	542.707
YDL182W::chr4_2:up	404.272	393.639	531.232
YDL183C::chr4_2:up	156.919	179.286	270.003
YDL184C::chr4_2:up	475.712	582.309	380.367
YDL185W::chr4_2:up	94.9772	37.5364	1.01251
YDL186W::chr4_2:up	297.733	310.663	575.782
YDL187C::chr4_2:up	470.756	424.754	460.018
YDL188C::chr4_2:up	269.24	462.785	451.918
YDL189W::chr4_2:up	857.272	1342.92	1130.3
YDL190C::chr4_2:up	465.388	925.57	649.358
YDL191W::chr4_3:up	555.823	918.655	42.5255
YDL192W::chr4_3:up	19.4084	41.4876	123.189
YDL194W::chr00_16b:up	8998.88	8840.82	1555.22
YDL197C::chr4_3:up	161.048	276.09	462.718
YDL198C::chr4_3:up	1027.41	526.004	210.94
YDL199C::chr4_3:up	94.5642	241.517	593.333
YDL200C::chr4_3:up	575.231	1077.69	657.121
YDL201W::chr4_3:up	362.565	504.766	512.669
YDL202W::chr4_3:up	1793	2169.7	355.055
YDL203C::chr4_3:up	335.724	600.089	545.407
YDL204W::chr4_3:up	192.432	308.194	263.253
YDL210W::chr4_3:up	2779.94	3408.9	3607.25
YDL211C::chr4_3:up	303.514	225.713	285.866
YDL213C::chr4_3:up	28.9061	290.907	48.6006
YDL215C::chr4_3:up	358.023	223.243	750.272
YDL216C::chr4_3:up	175.088	269.176	125.214
YDL218W::chr4_3:up	138.749	88.9021	345.267
YDL219W::chr4_3:up	130.49	351.163	388.805
YDL222C::chr4_3:up	415.835	941.868	541.019
YDL223C::chr4_3:up	231.662	242.505	199.803
YDL224C::chr4_3:up	367.107	426.73	495.794
YDL225W::chr4_3:up	181.283	134.341	215.328
YDL226C::chr4_3:up	111.082	84.457	241.653
YDL227C::chr4_3:up	354.719	468.712	797.86
YDL229W::chr4_3:up	166.004	170.396	352.692
YDL230W::chr4_3:up	272.956	336.84	317.929
YDL231C::chr4_3:up	425.746	417.84	764.11
YDL233W::chr4_3:up	181.283	287.944	275.066
YDL234C::chr4_3:up	410.88	606.016	400.28
YDL236W::chr4_3:up	427.81	407.962	749.597
YDL237W::chr4_3:up	182.108	325.974	445.843
YDL238C::chr4_3:up	94.9772	463.279	167.065
YDL239C::chr4_3:up	92.4995	148.664	201.828
YDL240W::chr4_3:up	263.045	253.865	307.804
YDL241W::chr4_3:up	3.30355	54.823	78.301
YDL242W::chr4_3:up	374.128	269.67	570.72
YDL243C::chr4_3:up	65.6581	240.53	238.616
YDR001C::chr4_3:up	284.106	317.578	448.543
YDR003W::chr4_3:up	149.899	451.919	447.531
YDR004W::chr4_3:up	473.234	644.54	243.003
YDR005C::chr4_3:up	201.93	284.487	402.98
YDR006C::chr4_3:up	504.618	357.09	152.552
YDR007W::chr00_16b:up	98.2807	355.114	64.4633
YDR008C::chr4_3:up	215.97	227.194	2.36253
YDR009W::chr4_3:up	275.847	169.408	265.616
YDR010C::chr4_3:up	402.621	660.839	827.898
YDR011W::chr4_3:up	291.539	430.681	717.197
YDR014W::chr4_3:up	359.674	360.053	414.455
YDR015C::chr4_3:up	320.445	509.705	724.622
YDR017C::chr4_3:up	604.55	123.475	164.702
YDR018C::chr4_3:up	574.818	358.572	657.796
YDR019C::chr4_3:up	336.137	549.711	369.567
YDR020C::chr4_3:up	692.92	744.308	926.449
YDR022C::chr4_3:up	131.729	187.188	262.241
YDR024W::chr4_3:up	342.744	533.906	101.589
YDR025W::chr4_3:up	635.108	674.668	183.94
YDR026C::chr4_3:up	282.867	376.846	771.872
YDR027C::chr4_3:up	24.7767	21.2377	0
YDR028C::chr4_3:up	10417.8	8869.96	950.412
YDR029W::chr4_3:up	1356.11	1338.96	2159.02
YDR030C::chr4_3:up	52.031	341.285	3.37504
YDR031W::chr4_3:up	546.738	453.895	526.507
YDR032C::chr4_3:up	129.665	368.45	200.478
YDR033W::chr4_3:up	460.02	625.278	828.573
YDR034C::chr4_3:up	53.2698	340.791	95.5137
YDR035W::chr4_3:up	433.179	344.743	185.627
YDR036C::chr4_3:up	194.084	309.182	390.155
YDR042C::chr4_3:up	96.216	239.048	357.755
YDR043C::chr4_3:up	1328.03	1754.83	458.331
YDR046C::chr4_3:up	534.763	334.371	721.247
YDR048C::chr00_16b:up	75.5688	249.914	283.841
YDR049W::chr4_4:up	1986.26	1787.43	2790.15
YDR051C::chr4_4:up	311.36	675.162	679.059
YDR055W::chr4_4:up	153.615	259.298	307.129
YDR056C::chr4_4:up	439.786	724.552	422.555
YDR057W::chr4_4:up	218.035	324.493	125.889
YDR058C::chr00_14:up	124.709	88.4082	137.702
YDR059C::chr4_4:up	441.85	423.767	450.568
YDR061W::chr4_4:up	294.016	442.041	404.33
YDR063W::chr4_4:up	184.999	497.852	259.878
YDR065W::chr4_4:up	2147.31	3014.77	210.94
YDR066C::chr4_4:up	405.098	323.999	743.522
YDR067C::chr4_4:up	725.956	504.272	848.486
YDR068W::chr4_4:up	457.955	467.724	617.295
YDR069C::chr4_4:up	47.4886	43.9571	211.615
YDR070C::chr4_4:up	84.6536	504.766	206.215
YDR071C::chr00_11:up	667.731	798.143	801.235
YDR072C::chr4_4:up	750.733	797.155	1009.81
YDR073W::chr4_4:up	303.927	538.845	2146.53
YDR074W::chr00_11:up	476.125	347.706	398.255
YDR075W::chr4_4:up	177.979	83.9631	476.894
YDR076W::chr4_4:up	830.018	849.015	720.234
YDR077W::chr4_4:up	501.727	698.869	735.422
YDR078C::chr4_4:up	241.159	404.998	303.754
YDR080W::chr4_4:up	253.961	211.389	86.4011
YDR083W::chr4_4:up	104.062	75.0729	381.717
YDR084C::chr4_4:up	305.992	458.834	440.106
YDR085C::chr4_4:up	588.033	593.174	1516.74
YDR089W::chr4_4:up	583.903	618.363	934.55
YDR090C::chr4_4:up	490.578	514.15	581.857
YDR093W::chr4_4:up	177.979	684.546	583.883
YDR094W::chr4_4:up	413.357	536.376	574.095
YDR095C::chr4_4:up	577.296	954.216	650.708
YDR096W::chr4_4:up	285.344	303.255	1181.27
YDR097C::chr4_4:up	360.913	337.828	722.259
YDR098C::chr4_4:up	419.964	566.01	350.33
YDR099W::chr4_4:up	177.566	177.31	468.456
YDR100W::chr4_4:up	364.217	548.23	532.582
YDR101C::chr4_4:up	754.862	527.486	262.241
YDR102C::chr4_4:up	316.315	553.169	415.805
YDR104C::chr4_4:up	261.394	388.7	393.193
YDR105C::chr4_4:up	1.65178	19.756	2.02503
YDR107C::chr4_4:up	610.745	384.255	607.17
YDR108W::chr4_4:up	249.418	421.791	636.533
YDR109C::chr4_4:up	293.19	333.877	236.591
YDR110W::chr4_4:up	360.087	426.236	654.421
YDR111C::chr4_4:up	280.802	557.12	643.283
YDR112W::chr4_4:up	479.428	639.601	516.382
YDR114C::chr4_4:up	1292.93	1319.21	571.732
YDR115W::chr4_4:up	1126.1	909.271	114.076
YDR116C::chr4_4:up	434.83	800.613	327.717
YDR117C::chr4_4:up	268.414	409.937	359.105
YDR119W::chr4_4:up	233.726	478.096	763.097
YDR120C::chr4_4:up	573.167	302.267	1004.08
YDR121W::chr4_4:up	965.051	1050.53	1337.53
YDR122W::chr4_4:up	448.87	465.748	537.982
YDR123C::chr4_4:up	521.549	861.856	1042.89
YDR124W::chr4_4:up	272.543	364.992	256.166
YDR125C::chr4_4:up	166.829	285.474	861.649
YDR126W::chr4_4:up	22.299	40.4998	125.214
YDR128W::chr4_4:up	1715.78	1663.95	1136.04
YDR130C::chr4_4:up	253.961	435.126	395.218
YDR131C::chr4_4:up	230.836	281.029	589.62
YDR132C::chr4_4:up	229.184	530.943	494.106
YDR133C::chr4_4:up	454.239	672.199	735.084
YDR134C::chr4_4:up	604.55	704.302	925.437
YDR135C::chr4_4:up	287.409	263.249	421.88
YDR136C::chr4_4:up	1240.9	1689.14	914.637
YDR137W::chr4_4:up	515.354	841.606	414.793
YDR138W::chr4_4:up	18.9954	0	0
YDR139C::chr4_4:up	265.11	366.474	361.467
YDR140W::chr4_4:up	198.213	124.463	69.5259
YDR142C::chr4_4:up	366.282	374.377	538.994
YDR143C::chr4_4:up	7.84594	23.7072	82.3511
YDR144C::chr4_4:up	578.535	794.686	451.581
YDR146C::chr4_4:up	296.494	483.035	284.854
YDR147W::chr4_5:up	893.198	975.453	1369.26
YDR148C::chr4_5:up	252.309	99.274	230.178
YDR149C::chr4_5:up	219.686	415.864	97.5388
YDR150W::chr4_5:up	967.115	1798.29	118.802
YDR151C::chr4_5:up	495.533	460.809	1452.96
YDR152W::chr4_5:up	1078.61	1548.87	1251.8
YDR153C::chr4_5:up	789.962	930.015	1650.4
YDR154C::chr4_5:up	814.326	896.429	1524.17
YDR155C::chr4_5:up	71.4394	466.736	109.689
YDR156W::chr4_5:up	1066.22	902.85	1083.05
YDR157W::chr4_5:up	865.944	676.644	1027.03
YDR158W::chr4_5:up	25.1896	70.1339	14.1752
YDR159W::chr4_5:up	415.835	278.066	59.0633
YDR161W::chr4_5:up	244.05	43.9571	49.6131
YDR162C::chr4_5:up	1077.78	975.453	425.255
YDR163W::chr4_5:up	405.511	484.516	277.429
YDR165W::chr4_5:up	10.3236	24.2011	19.2377
YDR169C::chr4_5:up	384.864	441.547	655.433
YDR171W::chr4_5:up	360.087	577.864	967.962
YDR173C::chr4_5:up	131.729	170.396	1.01251
YDR174W::chr00_14:up	130.903	88.4082	123.864
YDR176W::chr4_5:up	39.6426	19.2621	7.4251
YDR178W::chr4_5:up	260.568	600.583	675.009
YDR179W-A::chr4_5:up	7.02005	137.798	27.6754
YDR181C::chr4_5:up	1208.27	1708.4	1278.47
YDR183W::chr4_5:up	471.582	308.194	434.031
YDR184C::chr4_5:up	1954.05	1955.85	2266.34
YDR185C::chr4_5:up	1019.56	1546.4	1381.07
YDR186C::chr4_5:up	507.921	454.882	443.481
YDR191W::chr4_5:up	729.26	1011.51	1234.59
YDR192C::chr4_5:up	1130.23	1550.35	1726.67
YDR193W::chr4_5:up	2193.56	2759.42	2140.79
YDR195W::chr4_5:up	578.948	91.3716	827.561
YDR197W::chr4_5:up	180.044	242.011	45.9006
YDR198C::chr4_5:up	771.793	1457.99	1508.31
YDR200C::chr4_5:up	95.8031	619.845	42.188
YDR202C::chr00_14:up	441.85	795.18	328.392
YDR203W::chr4_5:up	657.407	576.382	271.691
YDR204W::chr4_5:up	694.572	1518.74	495.456
YDR205W::chr00_14:up	4195.51	4833.31	5085.18
YDR206W::chr4_5:up	439.786	606.016	537.307
YDR207C::chr4_5:up	299.385	72.6034	192.377
YDR209C::chr4_5:up	1085.63	1277.23	1685.5
YDR210W::chr4_5:up	1065.81	1315.26	1696.97
YDR213W::chr4_5:up	350.59	634.662	667.246
YDR214W::chr4_5:up	488.513	1267.35	994.963
YDR215C::chr4_5:up	1074.48	1854.6	1601.12
YDR216W::chr4_5:up	613.635	956.191	736.772
YDR217C::chr4_5:up	407.163	383.267	520.432
YDR218C::chr4_5:up	810.61	867.783	839.036
YDR219C::chr4_5:up	745.364	1027.31	729.347
YDR220C::chr4_5:up	270.066	448.462	462.381
YDR221W::chr4_5:up	784.181	1589.37	1089.46
YDR222W::chr4_5:up	810.61	1078.18	1419.88
YDR223W::chr4_5:up	460.02	292.883	435.043
YDR225W::chr4_5:up	621.894	435.126	152.552
YDR229W::chr4_5:up	1148.81	922.112	948.05
YDR230W::chr4_5:up	298.559	215.835	111.376
YDR231C::chr4_5:up	66.484	62.7254	5.73757
YDR233C::chr4_5:up	1593.96	1008.54	1272.73
YDR234W::chr4_5:up	1015.43	756.656	685.134
YDR237W::chr4_5:up	47.0756	74.0851	36.4505
YDR239C::chr4_5:up	543.435	267.2	381.717
YDR241W::chr4_5:up	276.673	247.938	39.1505
YDR242W::chr00_17a:up	175.088	119.03	223.428
YDR244W::chr4_6:up	427.397	176.816	70.2009
YDR245W::chr4_6:up	98.2807	28.6462	1.01251
YDR247W::chr4_6:up	66.897	62.7254	51.3007
YDR248C::chr4_6:up	306.818	115.079	171.115
YDR249C::chr4_6:up	71.0264	95.3228	136.352
YDR250C::chr4_6:up	61.5287	33.5852	46.5756
YDR251W::chr4_6:up	267.175	185.707	175.84
YDR252W::chr4_6:up	107.778	44.9449	81.6761
YDR253C::chr4_6:up	180.044	94.335	87.7511
YDR254W::chr4_6:up	321.271	131.871	137.702
YDR256C::chr4_6:up	270.478	82.9753	208.578
YDR257C::chr4_6:up	149.073	50.3779	71.2134
YDR258C::chr4_6:up	137.097	63.7132	77.626
YDR259C::chr4_6:up	232.488	105.695	181.24
YDR260C::chr4_6:up	79.6982	21.7316	39.1505
YDR261C::chr4_6:up	229.597	88.4082	98.2138
YDR262W::chr4_6:up	147.834	55.8108	86.7386
YDR263C::chr4_6:up	43.7721	34.573	32.0629
YDR264C::chr4_6:up	18.1695	0.4939	10.8001
YDR265W::chr4_6:up	362.978	149.652	139.389
YDR266C::chr4_6:up	23.1249	11.3597	13.5002
YDR268W::chr4_6:up	246.115	69.1461	37.463
YDR269C::chr4_6:up	127.6	52.3535	70.8759
YDR271C::chr4_6:up	4.54239	8.39631	20.9253
YDR272W::chr4_6:up	189.954	78.5302	96.8637
YDR273W::chr4_6:up	177.153	96.8045	201.49
YDR274C::chr4_6:up	49.5533	19.2621	27.6754
YDR275W::chr4_6:up	164.352	46.9205	37.8005
YDR276C::chr4_6:up	7.84594	0	22.6128
YDR277C::chr4_6:up	53.2698	33.0913	41.8505
YDR278C::chr4_6:up	38.4038	8.89021	12.4877
YDR279W::chr4_6:up	92.9125	44.9449	67.1634
YDR281C::chr4_6:up	790.375	684.052	658.133
YDR282C::chr4_6:up	64.8323	38.0303	36.4505
YDR283C::chr4_6:up	182.521	72.6034	67.5009
YDR284C::chr4_6:up	57.8122	25.6828	42.5255
YDR285W::chr4_6:up	14.453	14.3231	11.4751
YDR286C::chr4_6:up	184.173	132.859	143.439
YDR287W::chr4_6:up	290.713	213.859	287.891
YDR289C::chr4_6:up	6.60711	6.42071	0
YDR290W::chr4_6:up	29.732	14.3231	0.337504
YDR291W::chr4_6:up	474.886	256.334	344.929
YDR293C::chr4_6:up	621.481	352.151	55.3507
YDR294C::chr4_6:up	235.378	137.304	324.004
YDR295C::chr4_6:up	212.666	84.9509	41.8505
YDR296W::chr4_6:up	469.931	157.554	33.7504
YDR297W::chr4_6:up	1013.37	665.284	297.341
YDR298C::chr4_6:up	158.984	73.0973	16.8752
YDR300C::chr4_6:up	1541.93	579.345	102.601
YDR304C::chr4_6:up	448.457	294.859	431.331
YDR305C::chr4_6:up	233.314	103.225	208.915
YDR306C::chr4_6:up	136.685	223.737	188.327
YDR307W::chr4_6:up	135.033	35.0669	82.3511
YDR309C::chr4_6:up	168.481	84.9509	61.4258
YDR310C::chr4_6:up	741.648	262.261	587.933
YDR312W::chr4_6:up	234.965	94.335	100.914
YDR313C::chr4_6:up	127.187	78.0363	98.2138
YDR314C::chr4_6:up	494.707	259.792	361.467
YDR316W::chr4_6:up	180.044	90.8777	72.9009
YDR317W::chr4_6:up	100.345	39.512	158.965
YDR318W::chr4_6:up	101.997	17.7804	33.4129
YDR319C::chr4_6:up	1146.75	735.912	799.21
YDR320C::chr4_6:up	183.347	132.365	7.7626
YDR321W::chr4_6:up	280.389	182.249	192.04
YDR322W::chr4_6:up	319.206	139.28	59.4008
YDR323C::chr4_6:up	83.8277	1.9756	0
YDR326C::chr00_17a:up	271.304	324.493	184.615
YDR329C::chr4_6:up	423.268	158.048	101.589
YDR330W::chr4_6:up	49.1404	57.7864	99.2263
YDR332W::chr4_6:up	145.769	16.7926	9.78763
YDR333C::chr4_6:up	89.196	115.573	71.8884
YDR334W::chr4_6:up	154.441	114.091	144.789
YDR335W::chr4_6:up	124.709	30.1279	70.8759
YDR337W::chr4_6:up	181.283	82.9753	32.7379
YDR338C::chr4_7:up	310.121	74.0851	228.828
YDR340W::chr4_7:up	182.934	135.823	196.428
YDR344C::chr4_7:up	414.183	291.895	457.993
YDR345C::chr4_7:up	189.954	91.8655	74.926
YDR346C::chr4_7:up	189.541	177.804	58.7258
YDR347W::chr4_7:up	932.841	602.065	224.778
YDR348C::chr4_7:up	441.437	157.06	210.603
YDR349C::chr4_7:up	1158.72	1216.48	563.97
YDR351W::chr4_7:up	163.939	108.658	91.4637
YDR352W::chr4_7:up	306.818	124.957	184.952
YDR354W::chr4_7:up	169.72	44.9449	0
YDR357C::chr4_7:up	140.814	155.085	100.576
YDR358W::chr4_7:up	118.515	93.8411	84.7136
YDR359C::chr4_7:up	14.453	0	0
YDR360W::chr4_7:up	343.983	198.054	149.852
YDR363W-A::chr00_2:up	2319.51	1950.41	932.862
YDR363W::chr4_7:up	303.927	179.286	62.7758
YDR368W::chr4_7:up	229.597	60.2559	98.8888
YDR369C::chr4_7:up	32.2097	50.3779	54.3382
YDR370C::chr4_7:up	246.941	178.298	278.441
YDR371W::chr4_7:up	1306.97	1208.57	1271.38
YDR372C::chr4_7:up	1853.71	765.546	734.747
YDR374C::chr4_7:up	233.314	157.554	106.651
YDR375C::chr4_7:up	32.2097	72.1095	23.2878
YDR377W::chr4_7:up	43.3591	144.713	7.4251
YDR378C::chr4_7:up	698.702	327.95	338.854
YDR379W::chr4_7:up	189.954	83.9631	118.464
YDR380W::chr4_7:up	360.087	303.749	454.618
YDR383C::chr4_7:up	134.207	65.6888	78.301
YDR384C::chr4_7:up	277.499	327.456	585.57
YDR385W::chr4_7:up	664.427	378.822	322.992
YDR386W::chr4_7:up	326.226	189.658	233.553
YDR387C::chr4_7:up	37.5779	249.42	112.389
YDR388W::chr4_7:up	24.7767	0	183.602
YDR389W::chr4_7:up	64.4193	41.4876	24.6378
YDR391C::chr4_7:up	892.786	907.295	561.945
YDR392W::chr4_7:up	9.49772	15.3109	3.03754
YDR393W::chr4_7:up	822.172	384.255	119.139
YDR395W::chr4_7:up	423.681	187.188	525.494
YDR399W::chr4_7:up	127.6	134.835	183.94
YDR400W::chr4_7:up	174.262	180.274	140.064
YDR402C::chr4_7:up	285.344	168.914	285.529
YDR403W::chr4_7:up	235.791	254.359	211.278
YDR405W::chr4_7:up	1940.84	959.649	218.703
YDR406W::chr4_7:up	299.385	213.365	193.727
YDR408C::chr4_7:up	295.255	133.353	35.7755
YDR409W::chr4_7:up	422.855	136.317	238.616
YDR411C::chr4_7:up	397.252	561.071	510.644
YDR414C::chr4_7:up	818.043	483.529	448.543
YDR415C::chr4_7:up	106.127	50.3779	58.7258
YDR417C::chr00_17a/chr00_18:up	1304.49	570.949	125.552
YDR418W::chr4_7:up	1704.63	1245.12	477.231
YDR419W::chr4_7:up	292.365	292.883	390.155
YDR420W::chr4_7:up	156.919	68.1583	94.1637
YDR421W::chr4_7:up	141.64	135.823	150.189
YDR422C::chr4_7:up	12.8013	30.6218	29.0254
YDR423C::chr4_7:up	180.044	113.103	249.078
YDR424C::chr00_8:up	173.85	93.8411	118.127
YDR425W::chr4_7:up	321.684	137.798	116.439
YDR426C::chr4_7:up	297.733	209.908	134.664
YDR428C::chr4_7:up	96.629	196.572	169.427
YDR430C::chr4_7:up	502.14	336.84	709.097
YDR431W::chr4_7:up	266.349	429.2	345.604
YDR432W::chr4_7:up	160.222	116.067	14.8502
YDR433W::chr4_7:up	222.577	138.292	119.814
YDR435C::chr4_7:up	55.7475	80.0119	135.339
YDR436W::chr4_7:up	698.702	415.864	715.509
YDR438W::chr4_8:up	406.75	149.652	723.947
YDR439W::chr4_8:up	302.688	73.5912	214.653
YDR440W::chr4_8:up	177.153	205.957	248.066
YDR441C::chr4_8:up	291.126	320.048	525.157
YDR442W::chr4_8:up	341.505	51.3657	155.59
YDR443C::chr4_8:up	171.785	121.5	188.327
YDR444W::chr00_17a:up	204.82	144.219	265.953
YDR445C::chr00_14:up	303.101	197.56	227.14
YDR446W::chr4_8:up	275.434	429.2	356.067
YDR447C::chr4_8:up	940.274	511.187	432.681
YDR448W::chr4_8:up	248.18	110.14	21.9378
YDR450W::chr4_8:up	255.613	94.8289	51.3007
YDR451C::chr4_8:up	244.463	298.81	423.568
YDR452W::chr4_8:up	169.72	81.9875	95.8512
YDR455C::chr4_8:up	47.0756	40.4998	39.1505
YDR456W::chr4_8:up	33.8614	5.43291	2.36253
YDR457W::chr4_8:up	251.896	102.731	350.33
YDR458C::chr4_8:up	3.30355	16.7926	1.68752
YDR459C::chr4_8:up	279.15	55.8108	197.103
YDR461W::chr00_17a:up	1124.45	763.57	921.049
YDR463W::chr4_8:up	1030.3	588.235	716.859
YDR465C::chr4_8:up	291.952	131.871	316.242
YDR466W::chr4_8:up	308.882	274.609	199.803
YDR469W::chr4_8:up	602.899	517.608	453.943
YDR474C::chr4_8:up	48.3145	23.2133	302.066
YDR475C::chr4_8:up	79.2853	30.6218	243.341
YDR476C::chr4_8:up	275.021	330.419	212.29
YDR477W::chr4_8:up	309.708	296.834	620.333
YDR479C::chr4_8:up	294.429	275.596	398.593
YDR480W::chr4_8:up	413.357	627.254	463.056
YDR481C::chr4_8:up	457.542	411.913	273.041
YDR482C::chr4_8:up	142.466	192.127	128.252
YDR483W::chr4_8:up	1105.86	890.009	1279.14
YDR484W::chr4_8:up	325.4	208.92	146.814
YDR485C::chr4_8:up	283.693	169.408	262.241
YDR486C::chr4_8:up	162.7	136.317	421.205
YDR488C::chr4_8:up	91.6736	255.84	53.6632
YDR490C::chr4_8:up	262.633	348.694	336.154
YDR491C::chr4_8:up	238.682	112.115	491.069
YDR492W::chr4_8:up	403.447	461.303	732.722
YDR493W::chr00_17a:up	388.581	383.267	586.92
YDR494W::chr4_8:up	252.309	178.298	121.164
YDR495C::chr4_8:up	284.519	35.0669	89.4387
YDR496C::chr4_8:up	113.147	38.5242	58.3883
YDR497C::chr4_8:up	824.65	722.083	783.348
YDR500C::chr00_17a:up	642.541	233.121	553.17
YDR500C::chr4_8:up	128.839	21.7316	279.116
YDR501W::chr4_8:up	505.857	401.047	559.245
YDR502C::chr00_17a:up	531.459	769.497	396.568
YDR503C::chr4_8:up	272.956	208.426	390.83
YDR504C::chr4_8:up	388.581	235.097	304.429
YDR505C::chr4_8:up	374.54	476.12	547.095
YDR506C::chr00_17a:up	686.726	561.071	801.235
YDR506C::chr4_8:up	295.668	108.164	201.153
YDR507C::chr4_8:up	1325.55	813.454	360.455
YDR508C::chr4_8:up	234.139	316.59	555.532
YDR509W::chr4_8:up	454.239	259.792	227.815
YDR511W::chr4_8:up	291.539	169.902	177.527
YDR512C::chr00_17a:up	491.817	199.042	41.8505
YDR512C::chr4_8:up	291.952	242.505	75.601
YDR513W::chr4_8:up	467.04	563.54	712.472
YDR514C::chr4_8:up	303.927	201.018	272.704
YDR515W::chr00_17a:up	234.552	146.688	278.441
YDR516C::chr4_8:up	345.634	87.9143	233.216
YDR517W::chr4_8:up	62.7675	27.6584	219.378
YDR518W::chr4_8:up	2990.54	3198.01	849.161
YDR519W::chr4_8:up	287.409	121.006	50.9632
YDR520C::chr4_8:up	389.819	261.767	456.643
YDR521W::chr4_8:up	1456.04	1705.93	1495.82
YDR522C::chr4_8:up	350.177	511.187	305.104
YDR523C::chr4_8:up	191.193	220.28	235.916
YDR524C::chr4_8:up	158.984	95.8167	248.403
YDR525W-A::chr00_2:up	909.303	1171.04	1167.77
YDR525W::chr4_8:up	2117.58	1045.59	1497.84
YDR528W::chr4_8:up	680.532	617.87	686.821
YDR529C::chr4_8:up	1194.23	641.083	260.553
YDR530C::chr4_8:up	622.307	792.216	549.457
YDR532C::chr4_8:up	90.4348	18.7682	0.337504
YDR533C::chr4_8:up	587.207	422.285	291.266
YDR534C::chr4_8:up	627.675	847.039	413.78
YDR535C::chr00_2:up	72.2652	156.566	53.3257
YDR536W::chr00_2:up	573.993	478.59	432.006
YDR537C::chr00_14:up	407.576	284.487	518.744
YDR538W::chr00_2:up	605.789	380.797	435.381
YDR539W::chr00_2:up	1010.47	1575.05	1388.49
YDR540C::chr00_2:up	537.24	202.993	115.089
YDR541C::chr00_2:up	657.82	469.205	513.344
YEL001C::chr5_2:up	3514.57	5457.6	5698.76
YEL003W::chr5_2:up	337.375	394.133	1287.24
YEL004W::chr5_2:up	351.829	479.577	796.848
YEL005C::chr5_2:up	302.275	171.383	237.603
YEL006W::chr5_2:up	205.646	128.414	158.29
YEL008W::chr5_2:up	71.8523	460.809	74.251
YEL009C::chr5_2:up	858.511	1163.63	302.741
YEL010W::chr5_2:up	269.24	448.462	676.359
YEL011W::chr00_8:up	203.169	400.553	204.865
YEL012W::chr00_10:up	264.697	141.749	171.452
YEL014C::chr5_2:up	407.163	366.474	436.731
YEL015W::chr5_2:up	71.4394	296.834	343.242
YEL016C::chr5_2:up	793.679	911.246	929.149
YEL017C-A::chr5_2:up	156.919	517.608	301.391
YEL017W::chr5_2:up	226.706	330.913	396.568
YEL018W::chr5_2:up	199.452	115.079	439.093
YEL020C::chr5_2:up	245.289	163.975	355.055
YEL023C::chr5_2:up	536.828	660.345	669.271
YEL025C::chr5_2:up	296.081	481.059	442.468
YEL027W::chr5_2:up	109.017	102.731	14.8502
YEL028W::chr5_2:up	86.3054	69.64	111.039
YEL029C::chr5_2:up	3.30355	0	9.11262
YEL030W::chr5_2:up	286.583	299.304	232.54
YEL031W::chr5_2:up	491.404	386.23	57.7132
YEL037C::chr5_2:up	850.665	651.455	778.285
YEL038W::chr5_2:up	719.349	653.43	523.469
YEL039C::chr5_2:up	1813.24	2279.35	2178.93
YEL040W::chr5_2:up	1737.67	2049.69	2392.91
YEL041W::chr5_2:up	1432.09	2562.36	2507.66
YEL042W::chr5_2:up	3915.12	4713.29	5727.79
YEL043W::chr5_2:up	1264.02	1297.97	2623.08
YEL047C::chr5_2:up	3998.54	4645.13	4812.14
YEL048C::chr5_2:up	2728.32	4183.83	4025.41
YEL049W::chr5_2:up	215.97	578.357	756.01
YEL050C::chr5_2:up	539.305	339.804	270.341
YEL051W::chr5_2:up	7.433	0	0
YEL052W::chr5_2:up	543.435	514.15	503.219
YEL053C::chr5_2:up	216.796	102.237	26.6628
YEL054C::chr5_2:up	1213.64	775.424	283.504
YEL056W::chr5_2:up	601.247	1025.34	716.859
YEL057C::chr5_2:up	3826.34	5667.51	5109.82
YEL059W::chr5_2:up	3294.47	4350.28	5306.92
YEL060C::chr5_2:up	284.932	140.268	84.7136
YEL061C::chr5_2:up	625.611	540.821	740.485
YEL062W::chr5_2:up	152.789	103.719	171.452
YEL063C::chr5_2:up	284.932	126.932	119.477
YEL064C::chr5_2:up	46.6627	373.883	144.452
YEL065W::chr5_2:up	194.91	168.914	176.852
YEL066W::chr5_2:up	208.124	238.554	244.691
YEL067C::chr5_2:up	358.023	275.103	334.467
YEL068C::chr5_2:up	248.18	370.425	524.819
YEL071W::chr5_2:up	629.74	686.522	586.583
YEL072W::chr5_2:up	212.666	318.566	329.742
YER001W::chr5_2:up	811.435	682.077	959.525
YER002W::chr5_2:up	747.842	1018.92	675.346
YER004W::chr5_2:up	277.499	722.083	885.274
YER005W::chr5_2:up	279.563	424.754	839.373
YER007C-A::chr5_2:up	2412.83	4232.73	1691.91
YER007W::chr5_2:up	411.292	626.266	637.546
YER010C::chr5_2:up	202.343	222.255	220.728
YER011W::chr5_2:up	180.457	327.456	193.052
YER016W::chr5_3:up	791.201	339.804	475.544
YER017C::chr5_3:up	1042.27	470.687	79.651
YER019C-A::chr5_3:up	395.188	172.865	202.503
YER019W::chr5_3:up	441.85	371.907	439.431
YER020W::chr5_3:up	488.926	279.054	486.344
YER024W::chr5_3:up	340.679	185.213	150.864
YER027C::chr00_11:up	649.561	807.527	1279.82
YER028C::chr5_3:up	451.761	240.036	183.265
YER030W::chr5_3:up	205.646	362.029	509.294
YER031C::chr00_10:up	45.8368	46.9205	18.5627
YER032W::chr5_3:up	567.385	656.888	992.6
YER033C::chr5_3:up	774.271	332.395	272.704
YER034W::chr5_3:up	865.531	615.4	1198.48
YER037W::chr00_11:up	636.76	620.833	733.397
YER038W-A::chr5_3:up	897.328	1432.81	1208.27
YER039C-A::chr00_2:up	1044.34	1073.25	1122.88
YER039C::chr5_3:up	38.8168	120.512	44.2131
YER040W::chr5_3:up	1285.91	835.68	1292.98
YER041W::chr5_3:up	186.651	76.0607	142.764
YER042W::chr5_3:up	181.695	69.1461	146.139
YER044C-A::chr5_3:up	723.478	825.308	981.8
YER044C::chr5_3:up	171.785	96.3106	0.675009
YER045C::chr5_3:up	563.256	866.301	1106.68
YER046W-A::chr5_3:up	79.6982	58.7742	116.777
YER046W::chr00_10:up	286.17	164.963	339.867
YER048C::chr5_3:up	571.102	720.107	1309.85
YER049W::chr5_3:up	907.239	870.747	1129.29
YER050C::chr5_3:up	3988.22	3500.77	1243.03
YER051W::chr5_3:up	275.434	207.932	252.791
YER053C::chr5_3:up	94.9772	310.17	334.804
YER055C::chr5_3:up	196.149	354.127	474.194
YER056C-A::chr5_3:up	2042.01	2202.8	2421.93
YER056C::chr5_3:up	72.6782	173.853	242.328
YER057C::chr5_3:up	260.568	484.022	456.643
YER058W::chr5_3:up	314.251	344.743	62.1008
YER059W::chr5_3:up	297.32	483.035	379.692
YER060W-A::chr5_3:up	229.184	233.121	252.453
YER060W::chr5_3:up	754.449	1027.31	1361.83
YER061C::chr5_3:up	1553.08	1051.02	349.992
YER062C::chr5_3:up	456.303	137.304	412.093
YER063W::chr00_10:up	408.815	491.925	437.743
YER064C::chr00_8:up	359.674	405.986	469.469
YER065C::chr5_3:up	151.551	276.584	307.804
YER066W::chr00_10:up	74.7429	53.3413	53.6632
YER067C-A::chr5_3:up	414.596	237.566	548.782
YER067W::chr5_3:up	226.293	154.591	159.64
YER068C-A::chr5_3:up	692.92	502.791	547.432
YER068W::chr5_3:up	30.5579	0.4939	0
YER069W::chr5_3:up	307.643	413.395	331.767
YER070W::chr5_3:up	15.6919	0	0
YER071C::chr5_3:up	710.264	720.107	1513.03
YER072W::chr5_3:up	275.021	174.841	103.951
YER073W::chr5_3:up	264.284	608.979	632.821
YER074W::chr5_3:up	1021.21	366.474	985.513
YER075C::chr5_3:up	125.948	108.658	418.168
YER077C::chr00_8:up	2436.78	1495.53	599.07
YER078C::chr00_8:up	199.452	252.877	534.607
YER079W::chr5_3:up	141.64	104.213	129.939
YER080W::chr5_3:up	327.052	449.449	378.342
YER081W::chr5_3:up	228.358	659.357	722.934
YER083C::chr5_3:up	810.61	291.401	81.3385
YER084W::chr5_3:up	270.478	156.073	97.5388
YER085C::chr5_3:up	168.894	157.554	341.217
YER086W::chr5_3:up	338.201	102.237	65.1383
YER087C-A::chr5_3:up	202.756	114.091	172.465
YER087W::chr5_3:up	1231.4	743.814	257.178
YER088C::chr00_8:up	462.911	408.456	620.333
YER089C::chr00_17a:up	236.204	129.402	281.816
YER090W::chr00_8:up	526.504	342.767	17.5502
YER091C-A::chr00_2:up	991.892	1185.86	1135.7
YER091C::chr00_8:up	25.1896	152.121	75.601
YER092W::chr00_8:up	139.162	29.634	56.7007
YER093C-A::chr00_8:up	424.094	177.804	182.252
YER095W::chr00_8:up	335.311	408.456	205.54
YER096W::chr00_8:up	432.353	302.267	438.418
YER097W::chr00_8:up	150.725	133.847	114.751
YER098W::chr00_8:up	498.424	483.035	981.463
YER101C::chr00_5:up	342.744	381.291	398.593
YER103W::chr00_5:up	275.847	158.542	251.778
YER106W::chr00_5:up	651.626	816.911	623.708
YER108C::chr00_5:up	742.061	590.705	1238.3
YER109C::chr00_5:up	208.124	224.231	491.069
YER110C::chr00_5:up	1098.84	1122.64	1277.12
YER111C::chr00_5:up	410.054	404.011	635.858
YER113C::chr00_5:up	752.384	660.345	681.084
YER114C::chr00_5:up	152.789	209.908	225.79
YER115C::chr00_5:up	505.031	612.437	306.454
YER116C::chr00_5:up	68.9617	0.4939	3.71255
YER117W::chr00_5:up	312.599	319.06	191.027
YER118C::chr00_5:up	4.54239	18.7682	5.06257
YER119C-A::chr00_5:up	347.699	332.889	582.532
YER119C::chr00_5:up	412.944	726.528	746.897
YER120W::chr00_5:up	483.971	683.558	1193.42
YER121W::chr00_5:up	586.794	1071.76	929.149
YER122C::chr00_5:up	2232.38	1710.87	276.079
YER123W::chr00_5:up	256.851	208.92	648.346
YER124C::chr00_5:up	241.985	597.62	476.556
YER128W::chr00_5:up	393.536	260.286	382.73
YER129W::chr00_5:up	390.645	472.169	1110.39
YER130C::chr00_5:up	158.571	160.024	133.652
YER131W::chr00_5:up	826.301	506.248	486.681
YER132C::chr00_5:up	347.286	518.102	433.018
YER134C::chr00_5:up	216.383	146.688	158.29
YER135C::chr00_5:up	166.004	111.128	203.178
YER137C::chr00_5:up	334.485	518.596	346.954
YER139C::chr00_5:up	784.181	447.474	330.079
YER140W::chr00_5:up	1755.84	1200.18	1162.36
YER142C::chr00_5:up	110.256	78.5302	144.789
YER143W::chr00_5:up	60.7028	26.6706	42.8631
YER144C::chr00_2:up	613.222	282.017	508.282
YER145C::chr00_5:up	1230.57	797.649	1265.3
YER149C::chr00_5:up	431.94	691.955	475.206
YER150W::chr00_5:up	270.891	80.0119	195.753
YER151C::chr00_5:up	665.253	314.121	248.066
YER152C::chr00_5:up	1285.91	1292.04	1623.4
YER154W::chr00_5:up	2056.46	2357.88	1005.43
YER155C::chr00_5:up	87.5442	40.9937	0.337504
YER156C::chr00_5:up	96.629	72.6034	282.829
YER158C::chr00_5:up	172.611	311.651	476.556
YER161C::chr00_5:up	74.7429	162.493	176.515
YER162C::chr00_5:up	49.1404	186.694	150.189
YER163C::chr00_5:up	337.788	584.284	501.869
YER164W::chr00_5:up	348.938	501.803	624.721
YER166W::chr00_5:up	342.744	489.949	475.206
YER167W::chr00_5:up	214.318	130.884	248.066
YER169W::chr00_5:up	0.825889	30.6218	3.03754
YER170W::chr00_5:up	208.95	375.364	767.147
YER173W::chr00_5:up	337.788	408.456	392.518
YER174C::chr00_5:up	358.849	533.906	689.859
YER175C::chr00_5:up	82.5889	153.603	145.127
YER176W::chr00_5:up	65.2452	19.2621	35.438
YER177W::chr00_5:up	58.6381	0	31.3879
YER178W::chr00_5:up	913.02	859.881	256.166
YER179W::chr00_5:up	1422.59	900.874	1129.96
YER180C::chr00_5:up	231.662	248.432	392.855
YER181C::chr00_5:up	304.34	560.083	424.58
YER182W::chr00_5:up	770.141	571.937	845.786
YER183C::chr00_5:up	372.889	411.913	332.104
YER184C::chr00_5:up	471.169	373.389	381.717
YER185W::chr00_5:up	506.683	875.686	441.456
YER186C::chr00_5:up	717.697	440.559	753.647
YER187W::chr00_5:up	635.108	310.17	387.792
YER188W::chr00_2:up	149.899	91.8655	144.114
YFL001W::chr00_17a:up	223.403	42.4754	20.2503
YFL003C::chr00_17a:up	367.933	279.054	435.718
YFL004W::chr00_17a:up	449.283	262.755	228.49
YFL006W::chr6_1:up	94.9772	42.9693	74.251
YFL007W::chr00_17a:up	320.445	336.84	310.166
YFL010C::chr00_17a:up	214.731	323.011	159.64
YFL010W-A::chr00_17a:up	326.639	374.377	199.465
YFL011W::chr6_1:up	428.636	400.553	562.957
YFL012W::chr00_17a:up	922.517	810.491	832.961
YFL013C::chr00_17a:up	214.318	232.627	293.629
YFL013W-A::chr00_15:up	234.965	79.518	76.276
YFL014W::chr00_15:up	647.497	660.345	603.12
YFL015C::chr6_1:up	163.939	114.091	124.877
YFL016C::chr00_17a:up	634.282	338.322	25.3128
YFL018C::chr6_1:up	3036.38	3907.74	1041.54
YFL019C::chr00_15:up	536.828	371.907	436.056
YFL020C::chr6_1:up	298.146	225.713	290.591
YFL021W::chr6_1:up	540.544	681.583	1081.36
YFL025C::chr6_1:up	797.395	663.802	242.328
YFL027C::chr6_1:up	294.016	524.028	690.871
YFL028C::chr6_1:up	358.849	257.816	324.342
YFL030W::chr6_1:up	639.238	482.047	642.608
YFL031W::chr6_1:up	710.677	477.602	504.231
YFL032W::chr6_1:up	30.1449	189.658	88.7636
YFL033C::chr00_17a/chr00_18:up	5687.89	2704.11	2721.3
YFL034C-A::chr00_2:up	484.797	538.352	698.634
YFL034W::chr6_1:up	430.288	434.632	361.467
YFL035C-B::chr6_1:up	359.262	469.205	513.682
YFL036W::chr6_1:up	1209.1	2096.11	237.603
YFL040W::chr6_1:up	191.606	374.377	529.544
YFL041W::chr6_1:up	616.939	719.613	882.911
YFL042C::chr00_15:up	594.227	589.717	331.092
YFL043C::chr6_1:up	547.151	707.759	763.772
YFL044C::chr6_1:up	132.968	53.3413	61.7633
YFL046W::chr6_1:up	431.114	566.998	563.632
YFL047W::chr6_1:up	188.716	187.682	154.914
YFL048C::chr6_1:up	230.423	62.2315	133.314
YFL049W::chr6_1:up	353.48	477.108	529.207
YFL050C::chr6_1:up	193.258	465.748	605.145
YFL051C::chr6_1:up	118.515	363.017	344.254
YFL052W::chr6_1:up	396.014	448.956	422.893
YFL053W::chr6_1:up	422.442	379.809	664.884
YFL054C::chr6_1:up	419.138	584.778	721.584
YFL055W::chr6_1:up	446.806	711.711	785.035
YFL056C::chr6_1:up	251.483	264.237	113.739
YFL063W::chr00_18:up	273.369	267.2	588.27
YFR001W::chr6_1:up	147.008	102.237	11.1376
YFR006W::chr6_1:up	277.499	144.219	551.82
YFR007W::chr6_1:up	265.936	177.804	261.566
YFR008W::chr6_1:up	182.521	306.218	214.315
YFR009W::chr6_1:up	404.685	456.858	348.979
YFR010W::chr6_1:up	87.9571	86.9265	259.878
YFR011C::chr00_16b:up	146.595	121.006	196.765
YFR012W::chr6_1:up	230.836	484.516	509.294
YFR013W::chr00_16b:up	789.549	550.699	496.806
YFR014C::chr6_1:up	96.629	54.823	59.7383
YFR015C::chr6_1:up	280.389	426.236	881.561
YFR016C::chr6_1:up	137.923	65.6888	135.339
YFR017C::chr6_1:up	1143.86	1203.14	999.35
YFR018C::chr6_1:up	690.03	279.548	394.205
YFR020W::chr6_1:up	385.277	546.254	544.057
YFR021W::chr6_1:up	173.024	292.883	447.531
YFR022W::chr6_1:up	569.037	667.26	599.745
YFR023W::chr6_1:up	218.035	105.201	145.127
YFR024C-A::chr6_1:up	184.999	81.4936	196.09
YFR024C::chr00_15:up	1513.44	2658.67	2193.1
YFR025C::chr00_15:up	139.162	87.9143	133.652
YFR026C::chr6_1:up	336.55	256.334	359.442
YFR030W::chr00_15:up	352.241	48.4022	241.316
YFR031C-A::chr6_1:up	552.932	293.871	328.392
YFR032C-A::chr00_2:up	90.4348	154.591	178.877
YFR032C::chr00_2:up	543.022	498.839	495.456
YFR033C::chr00_2:up	763.121	1291.06	1284.88
YFR034C::chr00_2:up	86.7183	200.03	1414.82
YFR035C::chr00_2:up	851.078	904.332	1988.58
YFR036W::chr00_2:up	496.772	837.655	400.618
YFR038W::chr00_2:up	417.9	669.235	642.608
YFR039C::chr00_14:up	787.898	954.71	506.594
YFR040W::chr00_2:up	1008	725.54	1755.02
YFR041C::chr00_2:up	348.112	172.865	227.815
YFR043C::chr00_2:up	903.522	1147.82	619.995
YFR044C::chr00_2:up	572.754	468.218	1035.8
YFR045W::chr00_2:up	815.152	1016.94	823.511
YFR046C::chr00_2:up	381.148	555.144	585.908
YFR047C::chr00_2:up	667.318	1132.51	875.149
YFR048W::chr00_2:up	22.7119	103.225	35.7755
YFR053C::chr00_2:up	530.633	463.773	596.37
YFR054C::chr00_2:up	256.438	451.919	651.046
YFR055W::chr00_2:up	808.958	979.405	753.31
YFR056C::chr00_2:up	840.755	1024.84	1194.77
YFR057W::chr00_2:up	654.93	2315.9	463.731
YGL002W::chr7_1:up	37.5779	248.926	114.414
YGL003C::chr7_1:up	1248.33	1180.92	1042.55
YGL004C::chr7_1:up	1019.15	1419.47	1282.85
YGL005C::chr7_1:up	194.497	245.469	76.6135
YGL006W::chr7_1:up	1252.87	1632.84	1639.93
YGL007W::chr7_1:up	416.661	460.315	186.977
YGL009C::chr7_1:up	173.437	331.407	357.08
YGL010W::chr7_1:up	486.861	589.717	431.668
YGL012W::chr7_1:up	17.3437	30.1279	30.7129
YGL013C::chr7_1:up	219.273	406.974	435.381
YGL014W::chr7_1:up	98.6937	191.139	432.006
YGL015C::chr7_1:up	1105.86	1297.48	1406.72
YGL016W::chr7_1:up	95.8031	79.518	85.7261
YGL017W::chr7_1:up	362.565	287.944	573.42
YGL019W::chr7_1:up	20.2343	69.64	116.439
YGL020C::chr7_1:up	17.7566	0	8.1001
YGL021W::chr7_1:up	483.145	639.107	607.508
YGL023C::chr7_1:up	419.138	640.095	380.367
YGL025C::chr7_1:up	538.479	608.979	285.866
YGL026C::chr7_1:up	1357.76	1660.99	384.08
YGL027C::chr7_1:up	551.281	924.582	491.406
YGL028C::chr7_1:up	331.181	608.485	735.084
YGL031C::chr7_1:up	241.985	170.396	261.228
YGL032C::chr7_1:up	709.851	593.174	843.086
YGL034C::chr7_1:up	229.597	493.9	537.307
YGL035C::chr7_1:up	152.376	108.164	460.018
YGL037C::chr7_1:up	4798	5223.99	5773.01
YGL039W::chr7_1:up	267.588	352.645	430.656
YGL041C::chr7_1:up	813.087	1170.05	1302.43
YGL042C::chr7_1:up	236.204	339.31	528.532
YGL043W::chr7_1:up	61.9416	101.25	96.8637
YGL045W::chr7_1:up	18.9954	11.8536	314.217
YGL046W::chr7_1:up	106.127	128.908	1257.88
YGL049C::chr7_1:up	512.051	640.095	453.268
YGL050W::chr7_1:up	391.884	721.589	585.57
YGL051W::chr7_1:up	123.883	241.023	203.853
YGL053W::chr7_1:up	526.504	1098.93	846.123
YGL054C::chr7_1:up	739.17	724.058	125.889
YGL056C::chr7_1:up	403.447	368.45	718.547
YGL057C::chr7_1:up	1518.4	2367.76	1760.76
YGL059W::chr7_1:up	631.392	458.34	547.432
YGL060W::chr7_1:up	223.816	238.554	331.092
YGL062W::chr7_1:up	578.948	872.722	944
YGL063W::chr7_1:up	559.127	777.399	1125.58
YGL066W::chr7_1:up	5447.56	3659.31	1095.54
YGL067W::chr7_1:up	1053.42	1653.58	1621.71
YGL071W::chr7_1:up	174.262	130.39	205.878
YGL072C::chr7_1:up	442.263	347.706	433.356
YGL077C::chr7_1:up	163.526	237.566	366.53
YGL078C::chr7_1:up	202.343	292.389	129.264
YGL079W::chr7_1:up	455.065	550.699	763.435
YGL080W::chr7_1:up	873.377	658.863	793.473
YGL081W::chr7_1:up	2680.83	3453.85	3289.65
YGL082W::chr7_1:up	1182.26	1269.32	1372.29
YGL083W::chr7_1:up	635.521	525.51	674.334
YGL084C::chr7_1:up	830.844	458.34	303.754
YGL085W::chr7_1:up	428.223	595.644	528.532
YGL086W::chr7_1:up	186.651	540.821	405.68
YGL087C::chr7_1:up	9807.43	9613.28	7335.99
YGL088W::chr7_1:up	0	15.3109	5.73757
YGL089C::chr7_1:up	552.519	717.144	774.91
YGL090W::chr7_1:up	749.494	854.448	792.46
YGL094C::chr7_1:up	4457.32	6330.82	7127.75
YGL096W::chr7_1:up	438.96	519.089	1113.09
YGL101W::chr7_2:up	434.004	231.145	364.842
YGL104C::chr7_2:up	27.2543	111.128	31.3879
YGL105W::chr7_2:up	129.252	43.9571	43.2006
YGL107C::chr7_2:up	125.948	80.0119	59.7383
YGL108C::chr7_2:up	377.844	394.626	317.929
YGL109W::chr7_2:up	93.7383	133.353	258.528
YGL110C::chr7_2:up	170.546	99.7679	288.566
YGL114W::chr7_2:up	403.034	202.499	412.43
YGL115W::chr7_2:up	413.357	299.304	892.024
YGL117W::chr7_2:up	275.847	327.456	23.6253
YGL121C::chr7_2:up	645.019	718.625	686.484
YGL124C::chr7_2:up	222.577	54.823	92.8137
YGL125W::chr7_2:up	188.303	236.578	211.278
YGL126W::chr7_2:up	475.712	178.792	516.044
YGL127C::chr7_2:up	207.711	221.761	11.4751
YGL131C::chr7_2:up	210.189	364.005	517.057
YGL132W::chr7_2:up	9.91066	171.877	111.376
YGL133W::chr7_2:up	240.747	276.09	108.676
YGL135W::chr7_2:up	54.0957	68.6522	0.337504
YGL136C::chr7_2:up	500.076	440.065	216.003
YGL138C::chr7_2:up	94.1513	292.883	380.03
YGL139W::chr7_2:up	277.911	311.651	509.294
YGL140C::chr7_2:up	506.683	635.156	754.322
YGL141W::chr7_2:up	125.948	240.036	161.327
YGL143C::chr7_2:up	309.708	269.176	76.276
YGL144C::chr7_2:up	119.341	152.615	200.14
YGL146C::chr7_2:up	299.798	591.693	214.315
YGL147C::chr7_2:up	812.261	851.484	979.1
YGL148W::chr7_2:up	293.603	347.212	115.426
YGL149W::chr7_2:up	198.626	149.158	99.5638
YGL151W::chr7_2:up	111.495	42.9693	190.69
YGL152C::chr7_2:up	249.418	330.419	257.516
YGL153W::chr7_2:up	357.61	280.535	282.491
YGL154C::chr7_2:up	476.125	455.376	678.384
YGL156W::chr7_2:up	693.333	1005.58	1013.86
YGL157W::chr7_2:up	284.519	467.23	438.756
YGL158W::chr7_2:up	115.211	185.213	267.641
YGL159W::chr7_2:up	230.01	183.237	305.441
YGL160W::chr7_2:up	232.901	214.847	352.017
YGL161C::chr7_2:up	308.882	640.095	895.062
YGL162W::chr7_2:up	264.284	604.534	346.954
YGL163C::chr7_2:up	332.833	211.883	272.704
YGL164C::chr7_2:up	104.062	174.841	251.441
YGL165C::chr7_2:up	527.33	673.186	670.284
YGL166W::chr7_2:up	559.127	720.107	658.808
YGL167C::chr7_2:up	913.846	547.242	188.665
YGL168W::chr7_2:up	3915.95	3988.74	483.981
YGL170C::chr7_2:up	315.902	316.59	857.936
YGL175C::chr7_2:up	199.452	319.06	244.691
YGL176C::chr7_2:up	249.831	363.017	582.532
YGL177W::chr7_2:up	405.924	198.054	747.91
YGL179C::chr7_2:up	495.12	331.407	551.482
YGL180W::chr7_2:up	393.949	494.888	585.57
YGL181W::chr7_2:up	196.149	291.401	766.472
YGL194C::chr7_3:up	318.38	167.432	118.802
YGL195W::chr7_3:up	19.4084	89.8899	5.06257
YGL196W::chr7_3:up	73.5041	13.8292	37.1255
YGL197W::chr7_3:up	0	9.87801	1.35002
YGL198W::chr7_3:up	9.08477	8.39631	7.4251
YGL199C::chr7_3/chr00_12:up	59.464	29.634	61.7633
YGL200C::chr7_3:up	126.774	44.451	69.1884
YGL202W::chr7_3:up	104.062	29.634	36.4505
YGL203C::chr7_3:up	109.843	131.871	37.1255
YGL205W::chr7_3:up	162.7	140.268	312.867
YGL206C::chr7_3:up	0.412944	7.90241	0
YGL208W::chr7_3:up	73.0911	57.2925	60.4133
YGL209W::chr7_3:up	336.963	192.127	196.09
YGL210W::chr7_3:up	971.658	581.321	630.796
YGL211W::chr7_3:up	0	8.89021	4.72506
YGL212W::chr7_3:up	48.3145	15.3109	0
YGL213C::chr7_3:up	202.343	50.3779	111.376
YGL214W::chr7_3/chr00_12:up	78.0465	18.2743	30.0379
YGL215W::chr7_3:up	551.694	281.029	151.539
YGL216W::chr7_3:up	917.562	435.126	375.98
YGL217C::chr7_3/chr00_12:up	666.079	276.09	253.803
YGL218W::chr7_3/chr00_12:up	208.95	54.3291	30.7129
YGL219C::chr00_14:up	59.051	19.756	11.4751
YGL220W::chr7_3:up	185.825	129.896	187.652
YGL221C::chr7_3:up	96.216	41.4876	46.2381
YGL222C::chr7_3:up	271.717	334.371	176.852
YGL223C::chr7_3:up	102.41	9.38411	5.73757
YGL224C::chr7_3:up	149.899	78.0363	65.4758
YGL226C-A::chr7_3:up	110.256	73.5912	81.3385
YGL227W::chr7_3:up	230.836	180.768	168.752
YGL228W::chr7_3:up	88.783	40.0059	27.3379
YGL229C::chr7_3:up	219.273	98.7801	73.2384
YGL230C::chr7_3:up	336.137	68.1583	193.727
YGL231C::chr7_3:up	261.394	287.45	112.726
YGL232W::chr7_3:up	1923.49	1573.57	1871.8
YGL234W::chr7_3:up	17.7566	15.3109	2.02503
YGL235W::chr7_3/chr00_12:up	354.306	195.091	109.689
YGL236C::chr7_3:up	474.06	249.42	217.015
YGL237C::chr7_3:up	7.84594	3.9512	0
YGL241W::chr7_3:up	77.2206	14.817	36.788
YGL242C::chr7_3:up	119.754	96.8045	282.491
YGL243W::chr7_3:up	345.221	101.744	115.426
YGL244W::chr7_3:up	25.6025	0	1.35002
YGL246C::chr7_3:up	6.60711	0	0
YGL248W::chr7_3:up	119.754	28.1523	70.5384
YGL249W::chr7_3:up	88.3701	42.9693	27.6754
YGL250W::chr7_3:up	157.332	87.9143	286.879
YGL251C::chr7_3:up	671.86	287.944	631.133
YGL252C::chr7_3:up	30.5579	18.2743	22.6128
YGL253W::chr7_3:up	315.489	344.249	197.103
YGL254W::chr7_3:up	171.785	311.157	410.405
YGL255W::chr7_3:up	100.758	95.8167	96.8637
YGL256W::chr7_3:up	1868.99	1777.55	2139.44
YGL257C::chr7_3:up	128.426	299.304	227.815
YGL258W::chr7_3:up	116.037	120.512	160.99
YGL259W::chr7_3:up	2373.6	2603.84	1870.79
YGL260W::chr7_3:up	289.474	364.005	470.481
YGL261C::chr7_3:up	227.532	141.256	241.653
YGL262W::chr7_3:up	201.104	131.871	189.002
YGL263W::chr7_3:up	318.793	177.31	302.066
YGR001C::chr7_3:up	52.031	38.0303	68.8509
YGR003W::chr7_3:up	226.293	167.432	162.34
YGR004W::chr7_3:up	302.688	155.085	189.002
YGR007W::chr7_3:up	488.513	295.352	326.704
YGR008C::chr7_3:up	222.99	221.761	360.117
YGR010W::chr7_3:up	29.732	14.3231	19.5753
YGR011W::chr7_3/chr00_12:up	407.989	304.243	343.917
YGR012W::chr7_3:up	783.768	1361.68	1084.74
YGR014W::chr7_3:up	277.911	223.737	231.19
YGR015C::chr7_3:up	614.874	582.309	603.795
YGR016W::chr7_3:up	0	8.89021	0
YGR017W::chr7_3:up	987.763	503.285	637.208
YGR018C::chr7_3/chr00_12:up	173.85	196.078	280.466
YGR019W::chr7_3:up	391.884	197.066	279.791
YGR020C::chr7_3:up	22.7119	0	0.337504
YGR021W::chr7_3:up	289.061	751.223	378.342
YGR022C::chr7_3/chr00_12:up	432.353	349.188	490.731
YGR023W::chr7_3:up	349.351	347.706	309.829
YGR025W::chr7_3/chr00_12:up	481.08	397.096	575.107
YGR026W::chr7_3:up	294.016	156.073	353.03
YGR027C::chr7_4:up	390.232	947.301	208.24
YGR028W::chr00_14:up	373.715	712.205	802.923
YGR031W::chr7_4:up	945.642	751.223	1323.35
YGR032W::chr00_14:up	272.13	605.028	547.77
YGR033C::chr7_4:up	880.397	904.826	1137.39
YGR034W::chr7_4:up	1342.07	1366.62	1292.64
YGR035C::chr7_4:up	512.051	492.913	884.261
YGR036C::chr7_4:up	483.145	198.548	2.70003
YGR037C::chr7_4:up	517.006	490.937	192.04
YGR038W::chr00_14:up	528.569	607.004	390.493
YGR039W::chr7_4:up	552.519	757.149	1021.63
YGR040W::chr00_14:up	402.621	400.059	422.555
YGR041W::chr7_4:up	278.324	602.065	552.157
YGR042W::chr7_4:up	539.718	845.064	679.734
YGR043C::chr7_4:up	362.152	439.078	712.472
YGR044C::chr7_4:up	2068.85	3610.91	3266.03
YGR045C::chr7_4:up	1083.98	1076.7	1928.5
YGR049W::chr7_4:up	705.309	1173.51	1270.7
YGR050C::chr00_14:up	448.045	866.795	550.47
YGR051C::chr7_4:up	1078.61	1181.41	1616.98
YGR052W::chr7_4:up	1539.04	1486.15	1686.51
YGR053C::chr00_14:up	472.821	496.37	379.017
YGR054W::chr7_4:up	243.637	387.218	826.211
YGR055W::chr7_4:up	389.819	558.601	441.118
YGR056W::chr7_4:up	195.736	53.8352	77.9635
YGR057C::chr7_4:up	725.13	404.998	757.022
YGR058W::chr7_4:up	783.768	858.893	580.845
YGR059W::chr7_4:up	284.932	523.535	617.295
YGR061C::chr7_4:up	585.142	583.79	211.278
YGR063C::chr00_14:up	209.776	223.243	135.002
YGR064W::chr7_4:up	338.201	273.127	228.49
YGR066C::chr7_4:up	852.73	1250.56	1495.82
YGR067C::chr7_4:up	349.351	1145.85	677.034
YGR068C::chr7_4:up	367.107	583.79	425.593
YGR069W::chr7_4:up	531.872	1057.44	521.107
YGR070W::chr7_4:up	40.4685	244.975	65.8133
YGR071C::chr7_4:up	1239.25	1210.06	1833.32
YGR072W::chr7_4:up	204.82	171.877	1102.29
YGR077C::chr7_4:up	1299.12	1644.19	2090.16
YGR078C::chr7_4:up	109.017	97.2984	84.3761
YGR079W::chr7_4:up	1482.06	1318.71	3088.5
YGR080W::chr7_4:up	1408.55	1107.32	1538.01
YGR081C::chr7_4:up	421.203	511.681	237.603
YGR084C::chr7_4:up	341.505	350.669	543.044
YGR085C::chr7_4:up	552.932	252.383	967.962
YGR086C::chr00_14:up	329.117	458.34	562.62
YGR087C::chr7_4:up	356.371	572.431	686.146
YGR088W::chr7_4:up	708.199	1135.48	1276.78
YGR089W::chr00_14:up	316.728	285.968	563.97
YGR092W::chr00_14:up	17.7566	107.176	0
YGR093W::chr00_14:up	253.135	493.407	232.878
YGR096W::chr7_4:up	288.235	441.053	734.747
YGR097W::chr7_4:up	609.919	1343.41	1287.24
YGR100W::chr7_4:up	2161.35	2726.33	3784.44
YGR101W::chr7_4:up	1646.82	1278.71	383.067
YGR102C::chr7_4:up	1262.37	1209.56	311.517
YGR104C::chr7_4:up	220.099	90.3838	67.1634
YGR105W::chr7_4:up	74.7429	136.81	0.675009
YGR106C::chr00_14:up	377.431	701.339	450.906
YGR107W::chr7_4:up	1200.84	1035.22	2352.74
YGR108W::chr7_4:up	1598.51	1889.17	2550.18
YGR109C::chr7_4:up	417.487	587.248	1016.23
YGR110W::chr00_14:up	74.7429	400.553	207.903
YGR111W::chr7_4:up	706.135	968.045	1193.75
YGR112W::chr7_4:up	379.909	573.418	368.555
YGR117C::chr00_14:up	1484.12	2057.1	2555.92
YGR118W::chr7_4:up	713.155	247.444	167.065
YGR121C::chr7_4:up	28.9061	17.7804	30.7129
YGR122C-A::chr00_17a:up	139.575	67.6644	134.664
YGR122W::chr7_4:up	18.9954	4.4451	102.264
YGR123C::chr7_5:up	106.953	173.359	201.828
YGR124W::chr7_5:up	319.619	536.87	588.608
YGR125W::chr7_5:up	438.547	440.065	575.107
YGR126W::chr7_5:up	284.106	348.694	254.141
YGR127W::chr7_5:up	423.268	445.992	428.293
YGR129W::chr7_5:up	364.217	536.87	594.345
YGR130C::chr7_5:up	135.859	194.103	250.091
YGR131W::chr7_5:up	178.392	247.444	244.016
YGR132C::chr7_5:up	106.953	183.731	199.803
YGR133W::chr7_5:up	203.582	106.683	313.542
YGR134W::chr00_8:up	295.668	391.663	751.285
YGR135W::chr7_5:up	892.373	760.607	247.391
YGR136W::chr7_5:up	124.296	464.266	219.378
YGR137W::chr7_5:up	104.062	364.499	309.154
YGR138C::chr7_5:up	170.959	200.524	340.204
YGR139W::chr7_5:up	330.768	506.742	579.157
YGR141W::chr7_5:up	328.704	582.309	338.517
YGR142W::chr7_5:up	219.686	73.0973	125.552
YGR143W::chr7_5:up	397.665	656.888	875.824
YGR144W::chr7_5:up	47.4886	37.0425	84.3761
YGR146C::chr7_5:up	190.367	183.731	232.54
YGR148C::chr7_5:up	353.893	279.054	308.141
YGR149W::chr7_5:up	178.392	283.005	250.091
YGR150C::chr7_5:up	80.9371	56.3047	39.1505
YGR151C::chr7_5:up	374.953	712.205	841.398
YGR152C::chr7_5:up	61.9416	124.957	106.651
YGR153W::chr7_5:up	20.6472	21.7316	30.3754
YGR154C::chr7_5:up	188.716	217.81	359.78
YGR155W::chr00_11:up	16.5178	57.7864	14.1752
YGR157W::chr7_5:up	210.189	118.042	124.202
YGR159C::chr7_5:up	99.1066	26.6706	13.5002
YGR160W::chr7_5:up	117.689	56.3047	18.5627
YGR161C::chr7_5:up	384.864	242.505	570.72
YGR162W::chr00_17a:up	310.947	296.34	421.543
YGR163W::chr7_5:up	4.95533	69.64	11.1376
YGR164W::chr7_5:up	115.211	64.2071	221.74
YGR165W::chr7_5:up	736.28	287.944	67.8384
YGR166W::chr7_5:up	112.321	390.181	16.8752
YGR168C::chr7_5:up	529.807	784.808	1034.79
YGR169C::chr7_5:up	324.574	161.012	668.259
YGR170W::chr7_5:up	216.383	383.761	320.629
YGR171C::chr7_5:up	1349.09	986.319	254.141
YGR173W::chr7_5:up	453	610.955	470.144
YGR174C::chr7_5:up	365.043	285.968	170.44
YGR176W::chr7_5:up	352.654	361.535	343.242
YGR177C::chr7_5:up	301.862	203.487	617.633
YGR178C::chr7_5:up	253.961	132.859	507.607
YGR181W::chr7_5:up	172.198	307.206	493.094
YGR182C::chr7_5:up	733.802	1885.22	956.487
YGR184C::chr7_5:up	252.722	174.841	429.981
YGR187C::chr7_5:up	1118.25	511.681	227.14
YGR189C::chr7_5:up	265.11	559.095	504.231
YGR192C::chr7_5:up	1654.25	3157.01	1191.39
YGR193C::chr7_5:up	222.99	71.6156	114.414
YGR194C::chr7_5:up	496.359	512.669	393.53
YGR196C::chr7_5:up	166.829	256.334	514.357
YGR197C::chr7_5:up	380.322	390.181	560.595
YGR199W::chr7_5:up	259.329	240.036	271.691
YGR200C::chr7_5:up	567.798	796.661	226.465
YGR201C::chr00_10:up	137.51	90.8777	114.414
YGR202C::chr7_5:up	536.002	676.644	766.472
YGR203W::chr7_5:up	157.332	72.1095	196.428
YGR204W::chr00_10:up	1162.85	1598.76	464.406
YGR205W::chr7_5:up	212.666	347.212	564.307
YGR206W::chr7_5:up	219.686	98.7801	685.134
YGR207C::chr7_5:up	162.7	135.823	251.441
YGR208W::chr7_5:up	56.1604	234.109	89.1011
YGR209C::chr7_5:up	301.862	425.742	375.98
YGR210C::chr00_8:up	554.171	807.033	724.959
YGR212W::chr7_5:up	420.79	270.164	385.092
YGR213C::chr7_5:up	387.755	348.694	559.582
YGR214W::chr7_5:up	734.215	356.102	426.268
YGR215W::chr7_5:up	1119.08	1029.78	198.79
YGR217W::chr7_5:up	120.167	34.0791	76.6135
YGR219W::chr00_2:up	180.87	52.8474	5.06257
YGR220C::chr00_2:up	438.547	209.414	104.626
YGR221C::chr00_2:up	1198.78	1504.42	1665.92
YGR222W::chr00_2:up	833.322	736.9	306.791
YGR223C::chr00_2:up	266.349	196.078	144.114
YGR224W::chr00_2:up	578.535	1104.86	1155.61
YGR225W::chr00_2:up	687.552	718.131	1254.84
YGR226C::chr00_2:up	720.588	410.431	418.505
YGR227W::chr00_2:up	1567.12	1538.01	2114.8
YGR228W::chr00_2:up	818.456	1143.87	923.074
YGR229C::chr00_2:up	2331.48	2317.38	565.32
YGR230W::chr00_2:up	22.7119	63.2193	21.2628
YGR231C::chr00_2:up	881.223	728.997	817.098
YGR232W::chr00_2:up	1227.68	661.333	682.434
YGR233C::chr00_2:up	310.121	109.152	1561.63
YGR234W::chr00_2:up	740.822	660.839	1315.25
YGR235C::chr00_2:up	455.478	143.725	223.09
YGR236C::chr00_2:up	338.614	495.382	559.92
YGR237C::chr00_2:up	219.686	85.9387	933.875
YGR238C::chr00_14:up	195.323	358.078	365.18
YGR239C::chr00_14:up	31.3838	11.8536	28.3504
YGR240C::chr00_2:up	18.9954	25.1889	18.2252
YGR241C::chr00_2:up	817.217	1053	1237.97
YGR242W::chr00_2:up	1313.99	2376.16	1665.58
YGR243W::chr00_2:up	889.482	1230.8	1603.15
YGR244C::chr00_2:up	3.7165	115.079	34.4254
YGR247W::chr00_2:up	958.031	807.527	792.123
YGR248W::chr00_14:up	283.693	438.09	749.26
YGR249W::chr00_2:up	1525.83	1786.93	1623.4
YGR250C::chr00_14:up	433.591	551.687	437.743
YGR252W::chr00_17a:up	92.9125	75.0729	20.5878
YGR254W::chr00_17a:up	462.498	458.34	367.205
YGR255C::chr00_17a:up	17.7566	0.4939	0
YGR256W::chr00_3:up	149.899	118.042	101.926
YGR257C::chr00_17a:up	919.214	351.657	64.1258
YGR258C::chr00_17a:up	344.808	429.2	631.471
YGR259C::chr00_3:up	554.997	710.723	943.662
YGR260W::chr00_3:up	234.965	92.8533	135.002
YGR261C::chr00_3:up	231.249	57.7864	98.2138
YGR263C::chr00_3:up	92.4995	52.8474	153.564
YGR266W::chr00_3:up	280.802	538.352	623.371
YGR268C::chr00_3:up	93.7383	148.17	169.765
YGR269W::chr00_3:up	482.732	527.486	432.343
YGR270W::chr00_3:up	606.615	1063.86	959.525
YGR271W::chr00_17a:up	168.481	291.401	236.253
YGR272C::chr00_17a:up	15.6919	30.1279	0
YGR273C::chr00_17a:up	741.648	781.351	661.846
YGR275W::chr00_3:up	119.341	88.4082	95.5137
YGR276C::chr00_17a:up	170.133	131.378	236.591
YGR279C::chr00_3:up	2084.13	2833.01	2919.75
YGR281W::chr00_3:up	237.856	212.871	368.555
YGR282C::chr00_3:up	388.994	530.449	233.216
YGR283C::chr00_3:up	72.6782	116.561	274.391
YGR284C::chr00_3:up	324.987	386.23	652.733
YGR285C::chr00_3:up	9.91066	0	0
YGR286C::chr00_3:up	344.808	397.59	443.481
YGR287C::chr00_3:up	372.476	282.017	623.371
YGR288W::chr00_3:up	358.023	204.969	282.491
YGR289C::chr00_17a:up	368.759	138.292	558.57
YGR290W::chr00_3:up	80.1112	140.268	57.3757
YGR291C::chr00_17a:up	305.166	191.633	293.966
YGR292W::chr00_17a:up	460.02	912.234	609.533
YGR295C::chr00_17b:up	403.859	175.335	470.819
YHL002W::chr00_10:up	396.839	322.517	224.103
YHL003C::chr8_1:up	616.113	1358.23	1005.43
YHL005C::chr8_1:up	352.654	223.737	299.029
YHL006C::chr8_1:up	307.643	445.498	645.646
YHL007C::chr8_1:up	158.158	217.316	372.267
YHL008C::chr8_1:up	222.164	489.949	604.133
YHL009C::chr8_1:up	230.01	148.17	493.431
YHL010C::chr8_1:up	217.622	244.975	443.143
YHL011C::chr00_10:up	3.30355	26.6706	4.38756
YHL012W::chr8_1:up	124.296	198.548	270.678
YHL013C::chr8_1:up	178.392	172.865	212.29
YHL014C::chr8_1:up	355.958	263.249	425.93
YHL016C::chr8_1:up	277.499	210.896	204.19
YHL017W::chr8_1:up	381.561	560.577	239.291
YHL019C::chr8_1:up	316.728	470.687	438.756
YHL020C::chr8_1:up	715.632	729.491	438.081
YHL021C::chr8_1:up	236.204	211.883	469.806
YHL022C::chr8_1:up	420.377	353.139	642.946
YHL023C::chr8_1:up	162.7	100.262	145.464
YHL024W::chr00_8:up	1831.41	934.954	1003.4
YHL026C::chr8_1:up	52.4439	235.097	63.7883
YHL027W::chr8_1:up	46.6627	9.87801	170.777
YHL028W::chr8_1:up	119.341	158.542	205.878
YHL029C::chr8_1:up	192.432	74.579	123.189
YHL030W::chr8_1:up	80.9371	129.402	97.2013
YHL031C::chr8_1:up	768.902	446.486	223.765
YHL032C::chr8_1:up	172.198	161.999	203.853
YHL033C::chr8_1:up	272.543	3.9512	494.106
YHL034C::chr8_1:up	182.934	157.06	105.301
YHL035C::chr8_1:up	512.877	446.486	370.917
YHL036W::chr8_1:up	271.304	406.974	521.782
YHL037C::chr8_1:up	371.237	298.316	311.517
YHL038C::chr8_1:up	1260.72	846.545	495.456
YHL039W::chr00_10:up	98.2807	145.207	101.589
YHL040C::chr8_1:up	206.885	163.975	94.8387
YHL041W::chr8_1:up	152.789	81.4936	139.389
YHL042W::chr8_1:up	569.863	448.956	942.987
YHL043W::chr8_1:up	215.97	306.712	326.029
YHL044W::chr8_1:up	379.496	733.936	725.297
YHL045W::chr8_1:up	450.522	476.614	840.723
YHL046C::chr8_1:up	214.318	70.1339	158.29
YHL047C::chr8_1:up	1098.02	1098.93	1026.69
YHR001W-A::chr8_1:up	286.17	357.584	425.593
YHR003C::chr00_10:up	239.921	404.998	523.132
YHR004C::chr00_10:up	1991.63	2100.56	377.33
YHR006W::chr00_10:up	473.647	409.937	1107.35
YHR008C::chr00_10:up	1564.23	1484.17	549.795
YHR009C::chr00_10:up	141.64	241.023	345.267
YHR010W::chr8_1:up	448.87	164.469	48.2631
YHR011W::chr8_1:up	33.0355	0	0
YHR012W::chr8_1:up	261.807	147.182	141.752
YHR013C::chr8_1:up	367.52	176.816	88.0886
YHR014W::chr8_1:up	155.267	60.7498	71.8884
YHR015W::chr8_1:up	126.774	39.512	41.1755
YHR016C::chr00_8:up	282.454	294.859	234.903
YHR017W::chr00_8:up	376.605	734.43	636.871
YHR018C::chr8_1:up	386.103	492.419	551.82
YHR021C::chr8_1:up	400.143	217.81	132.639
YHR021W-A::chr00_3:up	201.93	291.895	407.03
YHR022C::chr8_1:up	485.622	415.37	602.783
YHR026W::chr00_10:up	85.0665	50.8718	13.5002
YHR028C::chr8_1:up	194.084	82.4814	139.052
YHR030C::chr8_1:up	15.2789	0	37.8005
YHR031C::chr8_1:up	1115.36	914.704	702.009
YHR032W::chr00_8:up	504.618	786.783	1064.49
YHR033W::chr8_1:up	633.869	401.541	496.806
YHR034C::chr8_1:up	415.422	403.517	819.461
YHR035W::chr8_1:up	377.018	698.375	660.834
YHR037W::chr8_1:up	413.77	278.066	207.228
YHR038W::chr8_1:up	555.41	175.335	29.0254
YHR039C::chr8_1:up	78.8724	104.707	55.6882
YHR041C::chr00_10:up	1580.75	991.258	139.389
YHR043C::chr8_1:up	296.494	257.322	373.28
YHR044C::chr8_1:up	249.418	790.241	822.836
YHR045W::chr00_8:up	726.369	1019.9	955.137
YHR046C::chr8_2:up	320.858	499.827	545.745
YHR047C::chr8_2:up	389.406	431.669	653.746
YHR048W::chr8_2:up	214.731	410.431	231.19
YHR049C-A::chr8_2:up	379.496	285.968	302.404
YHR049W::chr8_2:up	554.171	496.864	373.28
YHR050W::chr8_2:up	2127.9	1828.42	2334.52
YHR051W::chr8_2:up	1192.58	515.138	193.39
YHR057C::chr8_2:up	208.95	308.688	352.355
YHR059W::chr00_10:up	375.366	122.981	98.8888
YHR060W::chr8_2:up	57.3993	80.9997	0
YHR061C::chr8_2:up	253.548	96.8045	282.829
YHR064C::chr00_8:up	53.2698	0	58.3883
YHR066W::chr8_2:up	116.037	88.9021	88.7636
YHR067W::chr00_10:up	1616.26	803.576	293.291
YHR073W::chr8_2:up	270.066	187.188	448.881
YHR075C::chr8_2:up	347.699	342.767	677.034
YHR076W::chr8_2:up	395.601	244.481	223.428
YHR077C::chr8_2:up	265.11	58.2803	559.245
YHR078W::chr8_2:up	327.052	225.219	586.583
YHR079C-B::chr00_3:up	21.4731	103.225	320.292
YHR079C::chr8_2:up	118.928	34.0791	62.4383
YHR080C::chr8_2:up	87.9571	58.2803	100.239
YHR081W::chr8_2:up	118.515	0.4939	88.7636
YHR082C::chr8_2:up	199.865	301.279	493.431
YHR086W::chr8_2:up	496.359	362.029	870.086
YHR087W::chr8_2:up	346.46	471.675	689.859
YHR091C::chr8_2:up	2805.13	2521.36	961.55
YHR092C::chr8_2:up	842.819	679.113	983.825
YHR093W::chr8_2:up	352.654	380.303	438.418
YHR094C::chr8_2:up	253.548	274.115	211.615
YHR095W::chr8_2:up	161.461	87.4204	110.701
YHR096C::chr8_2:up	143.292	207.932	262.241
YHR097C::chr8_2:up	284.519	467.724	472.169
YHR100C::chr8_2:up	1635.26	1596.78	617.97
YHR103W::chr8_2:up	243.224	593.668	925.099
YHR104W::chr8_2:up	478.602	518.102	197.103
YHR105W::chr8_2:up	183.76	234.109	231.865
YHR106W::chr8_2:up	297.733	315.109	515.369
YHR108W::chr8_2:up	169.72	257.322	391.505
YHR109W::chr8_2:up	376.605	249.42	391.168
YHR110W::chr8_2:up	182.108	479.083	590.295
YHR111W::chr8_2:up	164.352	250.408	116.101
YHR112C::chr8_2:up	232.075	398.084	516.044
YHR113W::chr8_2:up	131.729	106.683	202.165
YHR114W::chr8_2:up	204.82	367.462	369.905
YHR116W::chr8_2:up	365.043	257.816	111.376
YHR117W::chr8_2:up	228.358	325.48	446.856
YHR120W::chr8_2:up	0	0	11.8127
YHR121W::chr8_2:up	293.19	306.712	512.669
YHR123W::chr8_2:up	249.005	407.468	167.402
YHR124W::chr8_2:up	245.289	173.853	224.103
YHR125W::chr8_2:up	120.993	100.262	144.789
YHR126C::chr8_2:up	445.567	302.267	356.405
YHR127W::chr00_10:up	211.015	153.603	163.69
YHR129C::chr8_2:up	253.961	139.28	190.69
YHR130C::chr8_2:up	338.201	257.816	322.654
YHR131C::chr00_10:up	182.108	510.199	96.1887
YHR132C::chr8_2:up	148.66	174.841	185.627
YHR132W-A::chr00_17b:up	630.566	681.089	1245.39
YHR133C::chr8_2:up	349.351	190.152	312.192
YHR134W::chr8_2:up	813.913	888.527	579.832
YHR135C::chr8_2:up	75.9817	56.3047	137.702
YHR136C::chr8_2:up	408.815	338.816	850.173
YHR137W::chr8_2:up	390.645	301.773	478.919
YHR138C::chr8_2:up	212.666	100.262	137.702
YHR139C-A::chr8_2:up	378.257	503.285	566.332
YHR139C::chr8_2:up	299.385	118.042	195.753
YHR140W::chr00_8:up	292.777	180.768	265.953
YHR142W::chr8_3:up	223.816	147.182	166.052
YHR143W::chr8_3:up	91.2607	37.0425	51.3007
YHR146W::chr00_15:up	366.695	307.206	323.329
YHR147C::chr8_3:up	517.832	174.347	62.7758
YHR150W::chr8_3:up	142.053	41.9815	36.4505
YHR151C::chr8_3:up	18.9954	16.2987	55.3507
YHR152W::chr8_3:up	201.93	81.9875	147.152
YHR153C::chr8_3:up	105.714	75.5668	63.4508
YHR154W::chr8_3:up	195.736	132.365	80.326
YHR155W::chr8_3:up	175.501	89.396	193.39
YHR156C::chr8_3:up	26.8414	55.8108	15.8627
YHR157W::chr8_3:up	84.2406	42.9693	30.7129
YHR158C::chr8_3:up	492.23	170.89	274.729
YHR159W::chr8_3:up	122.232	114.585	106.989
YHR160C::chr8_3:up	31.3838	15.3109	50.9632
YHR161C::chr8_3:up	41.7074	4.4451	9.11262
YHR162W::chr00_8:up	124.296	38.5242	71.2134
YHR163W::chr8_3:up	33.0355	61.2437	70.8759
YHR167W::chr8_3:up	0	5.43291	1.35002
YHR168W::chr00_8:up	1150.46	799.131	341.892
YHR171W::chr00_15:up	168.481	175.829	189.34
YHR176W::chr8_3:up	81.35	13.8292	33.0754
YHR177W::chr8_3:up	282.867	177.804	158.965
YHR179W::chr8_3:up	36.3391	101.25	125.552
YHR180W::chr00_10:up	30.1449	43.4632	33.0754
YHR181W::chr00_8:up	255.613	134.835	151.539
YHR182W::chr8_3:up	182.934	76.5546	55.0132
YHR183W::chr8_3:up	87.5442	13.3353	23.2878
YHR184W::chr8_3:up	251.896	329.926	354.38
YHR185C::chr00_10:up	123.057	61.2437	63.7883
YHR189W::chr8_3:up	64.8323	28.1523	41.513
YHR191C::chr00_8:up	47.9015	0.4939	6.41258
YHR193C::chr00_8:up	100.758	78.0363	114.076
YHR194W::chr00_10:up	212.666	25.6828	28.0129
YHR195W::chr8_3:up	71.4394	39.0181	43.2006
YHR198C::chr8_3:up	335.724	160.518	202.84
YHR199C::chr8_3:up	83.4147	51.3657	89.1011
YHR200W::chr8_3:up	163.113	164.469	62.4383
YHR202W::chr8_3:up	397.665	295.846	272.366
YHR203C::chr8_3:up	668.557	242.011	135.002
YHR204W::chr8_3:up	96.629	42.4754	122.177
YHR206W::chr8_3:up	955.14	454.388	397.243
YHR207C::chr8_3:up	139.575	148.664	364.842
YHR209W::chr8_3:up	295.668	150.146	220.39
YHR210C::chr8_3:up	80.5241	35.0669	33.0754
YIL001W::chr9_1:up	912.607	874.204	2036.16
YIL002C::chr9_1:up	307.231	237.072	274.391
YIL005W::chr9_1:up	104.888	244.481	403.655
YIL006W::chr9_1:up	586.381	747.765	946.025
YIL007C::chr9_1:up	697.05	1147.33	929.149
YIL008W::chr9_1:up	564.082	186.694	243.678
YIL009C-A::chr00_3:up	1504.36	1352.79	1225.82
YIL009W::chr9_1:up	754.449	434.632	802.248
YIL010W::chr9_1:up	279.976	143.725	154.577
YIL011W::chr9_1:up	774.271	839.631	786.048
YIL012W::chr9_1:up	280.389	219.292	435.718
YIL013C::chr9_1:up	814.739	1207.09	905.187
[truncated: 6,046 more rows]

## Sheet: flight+NaCl
Strain tag	7 generations	14 generations	21 generations
YAL002W::chr1_1:up	317.834	114.623	162.558
YAL004W::chr1_1:up	493.547	213.325	335.954
YAL005C::chr1_1:up	914.742	866.038	1116.23
YAL007C::chr1_1:up	1888.92	2149.17	1874.84
YAL008W::chr1_1:up	1033.61	639.976	980.769
YAL009W::chr1_1:up	891.486	1470.99	1343.82
YAL010C::chr1_1:up	149.873	57.3113	37.9303
YAL011W::chr1_1:up	870.814	639.976	314.28
YAL012W::chr00_12:up	157.625	85.967	65.0233
YAL013W::chr1_1:up	1025.86	1076.18	1170.42
YAL014C::chr1_1:up	2018.12	3177.59	2216.21
YAL015C::chr1_1:up	2687.38	2881.49	1912.77
YAL016W::chr00_12:dn	55.8939	46.9811	34.6291
YAL017W::chr1_1:up	2478.07	3098	2227.05
YAL018C::chr1_1:up	1382.45	1461.44	1392.58
YAL019W::chr1_1:up	826.886	490.33	845.304
YAL020C::chr1_1:up	2134.4	2314.74	1538.89
YAL021C::chr1_1:up	167.961	120.991	97.535
YAL022C::chr1_1:up	1196.4	856.486	942.839
YAL023C::chr1_1:up	4460.01	5938.09	5667.87
YAL024C::chr00_17a:up	49.0963	41.3915	16.2558
YAL026C::chr1_1:up	868.23	1053.89	872.397
YAL027W::chr1_1:up	1661.52	1627	1246.28
YAL028W::chr1_1:up	1604.67	1735.26	1544.3
YAL029C::chr1_1:up	925.078	1069.81	894.071
YAL030W::chr1_1:up	868.23	764.151	742.35
YAL031C::chr1_1:up	969.007	964.741	953.676
YAL034C::chr1_1:up	857.894	391.627	644.815
YAL035W::chr1_1:up	46.5123	3.18396	0
YAL036C::chr1_1:up	1713.2	2238.33	1988.63
YAL037W::chr1_1:up	563.316	375.708	341.373
YAL040C::chr1_1:up	93.0246	25.4717	27.0931
YAL042W::chr1_1:up	826.886	862.854	1045.79
YAL043C-A::chr1_1:up	361.762	226.061	205.907
YAL044C::chr1_1:up	1155.06	983.844	1842.33
YAL045C::chr1_1:up	777.789	273.821	509.35
YAL046C::chr1_1:up	1144.72	1391.39	1219.19
YAL048C::chr1_1:up	472.875	226.061	325.117
YAL049C::chr1_1:up	1183.48	1305.42	964.513
YAL051W::chr1_1:up	981.927	1085.73	1121.65
YAL053W::chr1_1:up	860.478	496.698	980.769
YAL054C::chr00_12:dn	315.865	270.347	277.968
YAL054C::chr00_12:up	315.25	340.684	298.024
YAL055W::chr1_1:up	648.588	554.009	509.35
YAL056W::chr1_1:up	1351.44	366.156	1045.79
YAL058C-A::chr00_12:dn	1727.51	1335.25	2479.25
YAL058C-A::chr00_12:up	2503.91	3282.67	4091.05
YAL058W::chr1_1:up	4116.34	5259.91	4757.54
YAL059W::chr1_1:up	193.801	66.8632	119.209
YAL060W::chr1_1:up	1025.86	1318.16	1305.89
YAL061W::chr1_1:up	1366.95	1560.14	1224.61
YAL062W::chr1_1:up	1036.19	1388.21	1332.98
YAL064C-A::chr00_1:dn	7.79915	5.76961	12.167
YAL064C-A::chr00_1:up	850.142	795.991	633.978
YAL065C::chr1_1:up	540.06	175.118	292.605
YAL066W::chr1_1:up	519.388	512.618	368.466
YAL067C::chr1_1:up	346.258	210.142	308.861
YAL068C::chr1_1:up	1255.83	1353.18	1511.79
YAR002C-A::chr00_16a:up	622.748	751.415	579.792
YAR002W::chr1_1:up	434.115	168.75	319.698
YAR003W::chr1_1:up	1627.93	2142.81	1208.35
YAR014C::chr1_1:up	1811.4	1830.78	2080.75
YAR015W::chr1_1:up	206.721	187.854	70.442
YAR018C::chr1_1:up	883.734	436.203	796.536
YAR020C::chr1_1:up	589.156	257.901	568.954
YAR023C::chr1_1:up	1224.82	1461.44	1435.93
YAR027W::chr1_1:up	883.734	569.929	742.35
YAR028W::chr1_1:up	1754.55	993.396	1571.4
YAR029W::chr1_1:up	2684.79	3263.56	2281.24
YAR030C::chr1_1:up	1886.33	1935.85	1815.24
YAR031W::chr1_1:up	718.357	299.292	585.21
YAR035W::chr1_1:up	1669.28	1235.38	1593.07
YAR037W::chr1_1:up	2080.13	1579.25	1788.14
YAR040C::chr1_1:up	2098.22	2152.36	1961.54
YAR042W::chr1_1:up	545.228	248.349	606.885
YAR043C::chr1_1:up	227.394	63.6793	151.721
YAR044W::chr1_1:up	36.1762	9.55189	16.2558
YAR047C::chr1_1:up	2320.45	2531.25	2107.84
YAR050W::chr00_12:up	85.2726	35.0236	75.8606
YBL001C::chr2_1:up	273.906	152.83	303.442
YBL002W::chr2_1:up	118.865	63.6793	92.1164
YBL005W::chr2_1:up	222.226	178.302	157.14
YBL006C::chr2_1:up	129.201	47.7594	59.6047
YBL007C::chr2_1:up	139.537	47.7594	32.5117
YBL008W::chr2_1:up	36.1762	25.4717	21.6744
YBL009W::chr2_1:up	198.969	66.8632	108.372
YBL010C::chr2_1:up	452.203	312.028	390.14
YBL011W::chr2_1:up	160.209	82.783	195.07
YBL012C::chr2_1:up	85.2726	70.0472	70.442
YBL013W::chr2_1:up	323.002	375.708	379.303
YBL015W::chr2_1:up	175.713	143.278	200.489
YBL017C::chr2_1:up	118.865	85.967	113.791
YBL019W::chr2_1:up	87.8566	25.4717	43.3489
YBL021C::chr2_1:up	85.2726	25.4717	108.372
YBL022C::chr2_1:up	49.0963	54.1274	65.0233
YBL024W::chr2_1:up	149.873	165.566	178.814
YBL027W::chr2_1:up	198.969	120.991	113.791
YBL028C::chr2_1:up	289.41	324.764	482.257
YBL029W::chr2_1:up	85.2726	35.0236	81.2792
YBL031W::chr2_1:dn	57.1937	36.2661	50.5397
YBL031W::chr2_1:up	816.55	420.283	948.257
YBL032W::chr2_1:up	38.7603	6.36793	16.2558
YBL036C::chr2_1:dn	23.3974	4.12115	14.9747
YBL036C::chr2_1:up	152.457	105.071	211.326
YBL037W::chr2_1:dn	10.3989	5.76961	11.231
YBL037W::chr2_1:up	718.357	936.085	866.978
YBL039C::chr2_1:up	240.314	95.5189	130.047
YBL043W::chr2_1:dn	12.9986	12.3634	20.5902
YBL043W::chr2_1:up	377.267	181.486	298.024
YBL044W::chr2_1:up	325.586	178.302	298.024
YBL046W::chr2_1:dn	5.19943	5.76961	12.167
YBL046W::chr2_1:up	72.3525	44.5755	86.6978
YBL047C::chr2_1:up	126.617	54.1274	65.0233
YBL048W::chr2_1:dn	23.3974	18.1331	25.2698
YBL048W::chr2_1:up	152.457	149.646	178.814
YBL049W::chr2_1:up	310.082	241.981	298.024
YBL051C::chr2_1:up	51.6804	35.0236	32.5117
YBL053W::chr2_1:up	134.369	66.8632	173.396
YBL054W::chr2_1:up	206.721	296.109	216.744
YBL055C::chr2_1:up	59.4324	25.4717	59.6047
YBL056W::chr2_1:up	85.2726	73.2311	173.396
YBL057C::chr2_1:up	1674.44	1496.46	1425.1
YBL059W::chr2_1:up	121.449	60.4953	70.442
YBL060W::chr2_1:up	80.1045	19.1038	43.3489
YBL061C::chr2_1:up	289.41	286.557	281.768
YBL062W::chr2_1:up	441.867	407.547	514.768
YBL063W::chr2_1:up	449.619	413.915	352.21
YBL064C::chr2_1:up	46.5123	22.2877	43.3489
YBL065W::chr2_1:up	126.617	31.8396	97.535
YBL066C::chr2_1:up	157.625	82.783	167.977
YBL067C::chr2_1:up	165.377	117.807	151.721
YBL068W::chr2_1:up	149.873	117.807	59.6047
YBL069W::chr2_1:up	224.81	82.783	178.814
YBL070C::chr2_1:up	211.889	114.623	167.977
YBL071C::chr2_1:up	317.834	210.142	195.07
YBL072C::chr2_1:dn	57.1937	37.9146	50.5397
YBL072C::chr2_1:up	1795.89	964.741	1463.03
YBL075C::chr2_1:up	186.049	171.934	184.233
YBL078C::chr2_1:dn	18.198	12.3634	21.5262
YBL078C::chr2_1:up	317.834	203.774	422.652
YBL079W::chr2_1:up	1000.01	461.675	791.117
YBL081W::chr2_1:up	80.1045	19.1038	54.1861
YBL082C::chr2_1:up	237.73	245.165	298.024
YBL083C::chr2_1:up	188.633	66.8632	200.489
YBL085W::chr2_1:up	134.369	82.783	151.721
YBL086C::chr2_1:dn	18.198	4.12115	7.48736
YBL086C::chr2_1:up	217.057	235.613	151.721
YBL087C::chr2_1:dn	6.49929	22.2542	12.167
YBL087C::chr2_1:up	2653.79	2442.1	3717.17
YBL088C::chr2_1:up	82.6886	41.3915	37.9303
YBL089W::chr2_1:up	2762.31	2747.76	2573.84
YBL091C::chr2_1:up	509.051	458.491	731.513
YBL091C-A::chr00_1:up	304.914	200.59	281.768
YBL094C::chr2_1:dn	90.9901	54.3992	94.528
YBL094C::chr2_1:up	2253.26	1244.93	2031.98
YBL095W::chr2_2:dn	0	4.94538	10.2951
YBL095W::chr2_2:up	509.051	216.509	373.884
YBL096C::chr2_2:up	826.886	493.514	644.815
YBL098W::chr2_2:dn	27.297	12.3634	37.4368
YBL098W::chr2_2:up	1372.11	1209.91	1408.84
YBL099W::chr2_2:up	994.847	560.377	579.792
YBL100C::chr2_2:up	1571.08	1295.87	932.001
YBL101C::chr2_2:dn	820.21	786.315	939.664
YBL102W::chr2_2:up	279.074	184.67	265.512
YBL103C::chr2_2:up	653.756	582.665	769.443
YBL104C::chr2_2:up	718.357	493.514	671.908
YBL106C::chr2_2:dn	25.9972	9.89076	20.5902
YBL106C::chr2_2:up	715.773	385.259	715.257
YBL107C::chr2_2:dn	53.2942	40.3873	61.7707
YBL107C::chr2_2:up	594.324	194.222	390.14
YBR001C::chr2_2:dn	59.7935	28.848	68.3222
YBR001C::chr2_2:up	1012.93	518.986	899.49
YBR003W::chr2_2:up	1038.78	850.118	942.839
YBR005W::chr2_2:dn	31.1966	26.3754	46.796
YBR005W::chr2_2:up	646.004	219.693	482.257
YBR006W::chr2_2:dn	10.3989	9.89076	4.6796
YBR006W::chr2_2:up	1917.34	1951.77	2216.21
YBR007C::chr2_2:up	1762.3	1130.31	1154.16
YBR008C::chr2_2:up	697.685	210.142	428.07
YBR009C::chr2_2:up	578.82	245.165	476.838
YBR010W::chr2_2:up	583.988	439.387	482.257
YBR012C::chr2_2:dn	46.7949	29.6723	53.3475
YBR012C::chr2_2:up	1338.52	745.047	932.001
YBR013C::chr2_2:dn	98.7892	46.9811	98.2716
YBR013C::chr2_2:up	1237.74	417.099	839.885
YBR014C::chr2_2:dn	7.79915	1.64846	14.0388
YBR014C::chr2_2:up	2124.06	1101.65	1663.51
YBR015C::chr2_2:dn	18.198	9.89076	6.55144
YBR015C::chr2_2:up	5.16804	289.741	395.559
YBR016W::chr2_2:up	2366.96	2579.01	2416.7
YBR018C::chr2_2:up	713.189	391.627	541.861
YBR019C::chr2_2:dn	46.7949	46.9811	41.1805
YBR019C::chr2_2:up	196.385	47.7594	167.977
YBR020W::chr00_18:up	165.377	41.3915	65.0233
YBR020W::chr2_2:dn	38.9957	14.0119	30.8854
YBR020W::chr2_2:up	111.113	22.2877	43.3489
YBR021W::chr2_2:up	335.922	277.005	303.442
YBR022W::chr2_2:dn	36.396	20.6057	33.6931
YBR022W::chr2_2:up	679.597	331.132	503.931
YBR023C::chr2_2:up	527.14	149.646	319.698
YBR024W::chr2_2:dn	6.49929	11.5392	18.7184
YBR024W::chr2_2:up	599.492	305.66	487.675
YBR025C::chr2_2:up	452.203	222.877	173.396
YBR026C::chr2_2:dn	23.3974	28.848	26.2058
YBR026C::chr2_2:up	865.646	1206.72	1127.07
YBR027C::chr2_2:dn	12.9986	9.89076	14.9747
YBR027C::chr2_2:up	470.291	340.684	368.466
YBR028C::chr2_2:dn	53.2942	29.6723	45.8601
YBR028C::chr2_2:up	534.892	216.509	379.303
YBR030W::chr2_2:up	374.683	210.142	254.675
YBR031W::chr2_2:up	297.162	117.807	135.465
YBR032W::chr2_2:up	436.699	197.406	363.047
YBR033W::chr2_2:up	1010.35	1041.16	1024.12
YBR034C::chr2_2:up	193.801	50.9434	102.954
YBR035C::chr2_2:up	315.25	136.91	173.396
YBR036C::chr2_2:dn	943.697	1426.74	1232.61
YBR036C::chr2_2:up	359.178	235.613	455.163
YBR037C::chr2_2:dn	6.49929	12.3634	3.74368
YBR037C::chr2_2:up	816.55	436.203	596.047
YBR039W::chr2_2:dn	132.586	106.326	216.198
YBR039W::chr2_2:up	3421.24	2012.26	4166.91
YBR040W::chr2_2:up	183.465	76.4151	102.954
YBR041W::chr2_2:up	330.754	92.3349	260.093
YBR042C::chr2_2:up	258.402	280.189	281.768
YBR043C::chr2_2:up	310.082	280.189	417.233
YBR045C::chr2_2:up	563.316	350.236	433.489
YBR046C::chr2_2:up	912.158	725.943	812.792
YBR047W::chr2_2:up	217.057	114.623	184.233
YBR048W::chr2_2:up	640.836	273.821	330.535
YBR050C::chr2_2:up	485.795	133.726	352.21
YBR051W::chr2_2:up	276.49	130.542	699.001
YBR052C::chr2_2:up	348.842	168.75	167.977
YBR053C::chr2_2:up	149.873	44.5755	157.14
YBR054W::chr2_2:up	705.437	404.363	455.163
YBR056W::chr2_2:dn	12.9986	10.715	18.7184
YBR056W::chr2_2:up	59.4324	28.6557	32.5117
YBR057C::chr2_2:up	198.969	130.542	189.651
YBR058C::chr2_2:up	317.834	156.014	287.186
YBR059C::chr2_2:up	1131.8	1044.34	980.769
YBR061C::chr2_2:up	276.49	95.5189	335.954
YBR062C::chr2_2:up	410.859	187.854	325.117
YBR063C::chr2_2:up	341.09	270.637	265.512
YBR064W::chr2_2:dn	18.198	18.1331	54.2834
YBR064W::chr2_2:up	739.029	525.354	801.955
YBR065C::chr2_2:up	527.14	627.241	677.327
YBR066C::chr2_2:up	857.894	589.033	671.908
YBR067C::chr2_2:dn	29.8967	24.7269	50.5397
YBR067C::chr2_2:up	276.49	89.151	178.814
YBR068C::chr2_2:dn	28.5969	12.3634	31.8213
YBR068C::chr2_2:up	651.172	331.132	606.885
YBR069C::chr2_2:up	258.402	130.542	173.396
YBR071W::chr2_2:up	338.506	111.439	265.512
YBR072W::chr2_2:dn	12.9986	5.76961	14.0388
YBR072W::chr2_2:up	697.685	359.788	823.629
YBR073W::chr2_2:dn	19.4979	3.29692	11.231
YBR073W::chr2_2:up	395.355	191.038	298.024
YBR074W::chr2_2:up	627.916	318.396	552.698
YBR075W::chr00_18:dn	341.863	363.485	306.982
YBR075W::chr2_2:dn	7.79915	5.76961	26.2058
YBR075W::chr2_2:up	170.545	111.439	167.977
YBR076W::chr2_2:up	410.859	165.566	330.535
YBR077C::chr2_2:up	552.98	146.462	113.791
YBR078W::chr2_2:dn	16.8982	6.59384	22.4621
YBR078W::chr2_2:up	3160.25	1954.95	3597.96
YBR082C::chr2_3:up	82.6886	12.7359	32.5117
YBR083W::chr00_16a:dn	9.09901	3.29692	14.9747
YBR083W::chr00_16a:up	124.033	143.278	151.721
YBR084C-A::chr00_16a:up	1578.83	1178.07	1197.51
YBR084W::chr2_3:up	1010.35	1350	1658.1
YBR085W::chr2_3:up	452.203	439.387	444.326
YBR090C::chr00_16a:up	98.1927	47.7594	189.651
YBR090C-A::chr2_3:up	258.402	257.901	270.931
YBR092C::chr2_3:up	490.963	407.547	498.512
YBR093C::chr2_3:up	459.955	292.925	466.001
YBR094W::chr2_3:up	509.051	410.731	466.001
YBR095C::chr2_3:up	397.939	312.028	422.652
YBR098W::chr2_3:up	90.4406	50.9434	21.6744
YBR099C::chr2_3:up	713.189	296.109	552.698
YBR100W::chr2_3/chr00_16a:up	511.636	251.533	265.512
YBR101C::chr2_3:up	211.889	98.7028	167.977
YBR103W::chr2_3:up	284.242	136.91	43.3489
YBR104W::chr2_3:dn	12.9986	11.5392	15.9106
YBR104W::chr2_3:up	372.099	264.269	368.466
YBR105C::chr2_3:up	483.211	547.642	644.815
YBR106W::chr2_3:up	286.826	114.623	37.9303
YBR107C::chr2_3:up	98.1927	105.071	113.791
YBR115C::chr2_3:up	139.537	41.3915	108.372
YBR116C::chr2_3:up	131.785	111.439	146.303
YBR119W::chr2_3:up	67.1845	108.255	119.209
YBR120C::chr2_3:up	149.873	101.887	195.07
YBR125C::chr00_16a:up	364.346	417.099	438.908
YBR128C::chr2_3:up	87.8566	54.1274	140.884
YBR129C::chr2_3:up	72.3525	19.1038	43.3489
YBR130C::chr2_3:up	147.289	57.3113	124.628
YBR131W::chr00_16a:up	10.3361	85.967	65.0233
YBR134W::chr2_3:dn	9.09901	20.6057	11.231
YBR134W::chr2_3:up	2240.34	2591.75	2590.1
YBR137W::chr2_3:up	74.9365	57.3113	157.14
YBR138C::chr2_3:up	385.019	235.613	325.117
YBR139W::chr2_3:dn	7.79915	4.94538	18.7184
YBR139W::chr2_3:up	266.154	277.005	368.466
YBR141C::chr2_3:up	423.779	515.802	395.559
YBR144C::chr2_3:up	917.326	487.146	568.954
YBR145W::chr2_3:dn	22.0976	16.4846	32.7572
YBR145W::chr2_3:up	354.01	229.245	270.931
YBR147W::chr2_3:dn	2.59972	2.47269	10.2951
YBR147W::chr2_3:up	560.732	388.443	379.303
YBR148W::chr2_3:dn	23.3974	17.3088	45.8601
YBR148W::chr2_3:up	679.597	468.043	715.257
YBR150C::chr00_16a:up	118.865	70.0472	124.628
YBR151W::chr2_3:up	490.963	372.524	357.628
YBR157C::chr2_3:dn	16.8982	8.2423	20.5902
YBR157C::chr2_3:up	201.553	66.8632	173.396
YBR158W::chr2_3:dn	94.8896	84.8957	85.1687
YBR158W::chr2_3:up	751.949	579.481	677.327
YBR161W::chr2_3:up	255.818	216.509	216.744
YBR162W-A::chr2_3:up	255.818	187.854	379.303
YBR163W::chr2_3:dn	29.8967	28.848	20.5902
YBR163W::chr2_3:up	1093.04	1085.73	953.676
YBR164C::chr2_3:up	69.7685	12.7359	43.3489
YBR165W::chr2_3:up	46.5123	127.359	108.372
YBR169C::chr00_16a:up	323.002	162.382	243.838
YBR170C::chr2_3:up	503.883	433.019	352.21
YBR171W::chr2_3:up	219.642	73.2311	222.163
YBR172C::chr2_3:up	1196.4	770.519	959.094
YBR173C::chr2_4:dn	535.541	450.854	547.513
YBR173C::chr2_4:up	816.55	678.184	606.885
YBR174C::chr2_4:dn	22.0976	14.8361	19.6543
YBR174C::chr2_4:up	1511.65	1541.04	1083.72
YBR175W::chr2_4:up	1824.32	1550.59	1311.3
YBR176W::chr2_4:up	534.892	181.486	335.954
YBR177C::chr2_4:up	248.066	108.255	184.233
YBR178W::chr2_4:up	330.754	270.637	330.535
YBR180W::chr2_4:dn	35.0962	24.7269	62.7067
YBR180W::chr2_4:up	540.06	487.146	726.094
YBR181C::chr2_4:up	532.308	235.613	222.163
YBR182C::chr2_4:up	165.377	248.349	200.489
YBR183W::chr2_4:up	222.226	76.4151	108.372
YBR184W::chr2_4:dn	5.19943	6.59384	12.167
YBR184W::chr2_4:up	2087.89	1849.88	1858.58
YBR185C::chr2_4:up	170.545	54.1274	135.465
YBR186W::chr2_4:up	165.377	41.3915	124.628
YBR187W::chr2_4:dn	10.3989	7.41807	10.2951
YBR188C::chr2_4:up	294.578	200.59	314.28
YBR189W::chr00_14:up	178.297	162.382	16.2558
YBR191W::chr00_11:dn	58.4936	60.993	10.2951
YBR194W::chr2_4:up	410.859	299.292	455.163
YBR195C::chr2_4:up	103.361	60.4953	119.209
YBR197C::chr2_4:up	217.057	76.4151	151.721
YBR199W::chr2_4:dn	35.0962	28.0238	45.8601
YBR199W::chr2_4:up	945.75	945.637	953.676
YBR200W::chr2_4:up	62.0164	31.8396	32.5117
YBR203W::chr2_4:dn	703.223	617.348	467.024
YBR203W::chr2_4:up	609.828	604.953	406.396
YBR204C::chr2_4:dn	610.933	509.374	379.048
YBR204C::chr2_4:up	281.658	213.325	525.605
YBR205W::chr2_4:dn	678.526	553.882	569.975
YBR205W::chr2_4:up	842.39	773.703	872.397
YBR206W::chr2_4:dn	724.021	598.391	591.502
YBR206W::chr2_4:up	697.685	856.486	774.862
YBR207W::chr2_4:dn	623.932	532.452	474.512
YBR207W::chr2_4:up	780.373	697.288	715.257
YBR208C::chr2_4:dn	262.571	381.618	267.673
YBR208C::chr2_4:up	297.162	235.613	249.256
YBR210W::chr2_4:dn	447.151	410.466	289.199
YBR210W::chr2_4:up	211.889	130.542	108.372
YBR212W::chr2_4:dn	1276.46	1312.17	1147.44
YBR212W::chr2_4:up	1390.2	999.764	1376.33
YBR213W::chr2_4:dn	584.936	567.07	495.102
YBR214W::chr2_4:dn	1199.77	1148.15	828.289
YBR214W::chr2_4:up	759.701	512.618	449.745
YBR216C::chr2_4:dn	2443.73	2195.75	1913.96
YBR216C::chr2_4:up	2943.2	1964.5	2508.82
YBR217W::chr2_4:dn	2643.91	2226.24	2068.38
YBR217W::chr2_4:up	648.588	197.406	520.187
YBR218C::chr2_4:dn	2550.32	2183.38	2853.62
YBR218C::chr2_4:up	793.293	264.269	856.141
YBR219C::chr2_4:dn	1171.17	996.494	1019.22
YBR219C::chr2_4:up	488.379	156.014	379.303
YBR220C::chr2_4:dn	491.346	425.303	296.687
YBR220C::chr2_4:up	896.654	878.774	639.396
YBR221C::chr2_4:dn	4731.48	8539.02	9765.39
YBR221C::chr2_4:up	1165.39	1404.13	2855.61
YBR222C::chr2_4:dn	2017.38	1694.62	1868.1
YBR222C::chr2_4:up	932.83	948.821	899.49
YBR223C::chr2_4:dn	1047.69	1048.42	949.023
YBR223C::chr2_4:up	875.982	662.264	953.676
YBR224W::chr2_4:dn	798.113	758.291	416.485
YBR224W::chr2_4:up	1483.23	1509.2	1165
YBR225W::chr2_4:dn	1997.88	1512.46	1200.79
YBR225W::chr2_4:up	971.591	334.316	460.582
YBR226C::chr2_4:dn	200.178	76.6534	100.143
YBR226C::chr2_4:up	191.217	226.061	178.814
YBR227C::chr2_4:dn	491.346	421.181	496.038
YBR227C::chr2_4:up	576.236	512.618	536.443
YBR228W::chr2_4:dn	514.744	459.096	394.958
YBR228W::chr2_4:up	108.529	47.7594	108.372
YBR229C::chr2_4:dn	764.316	797.854	962.126
YBR229C::chr2_4:up	405.691	439.387	764.024
YBR230C::chr2_4:dn	401.656	272.82	318.213
YBR230C::chr2_4:up	385.019	257.901	249.256
YBR231C::chr2_4:dn	458.85	312.383	182.504
YBR231C::chr2_4:up	131.785	50.9434	43.3489
YBR232C::chr00_8:dn	328.864	330.516	233.98
YBR232C::chr00_8:up	372.099	353.42	390.14
YBR233W::chr2_4:dn	259.972	239.851	182.504
YBR233W::chr2_4:up	121.449	38.2076	48.7675
YBR235W::chr2_4:dn	609.633	533.277	515.692
YBR235W::chr2_4:up	147.289	210.142	195.07
YBR238C::chr2_4:dn	148.184	150.01	146.004
YBR238C::chr2_4:up	126.617	22.2877	81.2792
YBR239C::chr2_4:dn	423.754	562.949	644.849
YBR239C::chr2_4:up	372.099	337.5	319.698
YBR240C::chr2_4:dn	400.356	468.987	442.69
YBR240C::chr2_4:up	354.01	315.212	287.186
YBR241C::chr2_4:dn	393.857	292.602	394.958
YBR241C::chr2_4:up	532.308	805.543	671.908
YBR242W::chr2_4:dn	525.143	567.894	545.642
YBR242W::chr2_4:up	620.164	608.137	482.257
YBR244W::chr2_4:dn	357.461	359.364	339.739
YBR244W::chr2_4:up	242.898	210.142	222.163
YBR245C::chr2_4:dn	146.884	120.338	136.644
YBR245C::chr2_4:up	121.449	98.7028	146.303
YBR246W::chr2_4:dn	127.386	78.3018	41.1805
YBR246W::chr2_4:up	113.697	85.967	21.6744
YBR248C::chr2_4:dn	608.333	564.597	569.975
YBR248C::chr2_4:up	315.25	343.868	498.512
YBR249C::chr2_4:dn	176.781	192.87	151.619
YBR249C::chr2_4:up	191.217	101.887	140.884
YBR250W::chr2_4:dn	670.727	490.417	403.382
YBR250W::chr2_4:up	248.066	95.5189	205.907
YBR251W::chr2_4:dn	1680.72	1589.12	1209.21
YBR251W::chr2_4:up	1263.58	1171.7	1278.79
YBR255W::chr2_4:dn	20.7977	6.59384	16.8466
YBR258C::chr2_4:dn	227.475	223.366	245.211
YBR258C::chr2_4:up	196.385	63.6793	119.209
YBR259W::chr2_4:dn	413.355	336.286	389.343
YBR259W::chr2_4:up	413.443	369.34	400.977
YBR260C::chr2_4:dn	574.537	632.184	511.948
YBR260C::chr2_4:up	206.721	111.439	113.791
YBR261C::chr2_4:dn	284.669	261.281	206.838
YBR261C::chr2_4:up	64.6004	57.3113	48.7675
YBR262C::chr2_4:dn	206.677	112.095	129.157
YBR262C::chr2_4:up	289.41	206.958	292.605
YBR263W::chr2_4:dn	250.873	297.547	253.634
YBR263W::chr2_4:up	227.394	149.646	211.326
YBR264C::chr2_4:dn	436.752	433.545	375.304
YBR264C::chr2_4:up	248.066	140.094	173.396
YBR266C::chr2_4:dn	58.4936	38.7388	7.48736
YBR266C::chr2_4:up	54.2644	15.9198	10.8372
YBR267W::chr2_4:dn	139.085	84.0714	29.9494
YBR267W::chr2_4:up	224.81	127.359	48.7675
YBR268W::chr2_4:dn	912.5	1335.25	618.643
YBR268W::chr2_4:up	2335.95	2696.82	2069.91
YBR269C::chr00_1:up	201.553	235.613	157.14
YBR270C::chr00_16a:dn	1363.55	1589.12	1419.79
YBR270C::chr00_16a:up	1025.86	977.477	796.536
YBR271W::chr00_1:dn	439.352	380.794	299.494
YBR271W::chr00_1:up	359.178	544.458	493.094
YBR272C::chr00_16a:dn	2133.07	2019.36	2457.73
YBR272C::chr00_16a:up	764.869	862.854	829.048
YBR273C::chr00_1:up	74.9365	12.7359	27.0931
YBR275C::chr00_16a:up	118.865	54.1274	70.442
YBR276C::chr00_16a:dn	802.012	599.215	744.993
YBR276C::chr00_16a:up	144.705	127.359	222.163
YBR277C::chr00_1:dn	2048.58	2504.01	1835.34
YBR277C::chr00_1:up	1966.44	1945.4	1717.7
YBR278W::chr00_1:dn	180.68	107.15	176.889
YBR278W::chr00_1:up	958.671	694.104	764.024
YBR279W::chr00_1:up	33.5922	9.55189	27.0931
YBR280C::chr00_16a:up	1175.73	681.368	818.21
YBR281C::chr00_1:dn	11.6987	10.715	14.9747
YBR281C::chr00_1:up	271.322	286.557	254.675
YBR282W::chr00_1:dn	15.5983	7.41807	6.55144
YBR282W::chr00_1:up	121.449	57.3113	37.9303
YBR283C::chr00_1:up	193.801	108.255	135.465
YBR284W::chr00_1:dn	734.42	740.158	702.876
YBR284W::chr00_1:up	679.597	862.854	769.443
YBR285W::chr00_1:dn	20.7977	11.5392	15.9106
YBR285W::chr00_1:up	622.748	687.736	498.512
YBR286W::chr00_1:up	175.713	60.4953	135.465
YBR287W::chr00_16a:dn	683.725	710.486	810.507
YBR287W::chr00_16a:up	310.082	464.859	390.14
YBR288C::chr00_16a:dn	189.779	167.319	160.042
YBR288C::chr00_16a:up	95.6087	111.439	97.535
YBR290W::chr00_1:up	459.955	684.552	422.652
YBR291C::chr00_1:up	98.1927	82.783	65.0233
YBR292C::chr00_1:up	369.515	445.755	319.698
YBR293W::chr00_1:dn	211.877	219.245	170.337
YBR293W::chr00_1:up	85.2726	60.4953	43.3489
YBR294W::chr00_16a:dn	509.544	577.785	435.203
YBR294W::chr00_16a:up	379.851	385.259	298.024
YBR295W::chr00_1:up	124.033	184.67	102.954
YBR296C::chr00_1:dn	38.9957	19.7815	39.3087
YBR296C::chr00_1:up	423.779	464.859	514.768
YBR297W::chr00_1:dn	217.076	210.179	181.569
YBR297W::chr00_1:up	284.242	280.189	243.838
YBR298C::chr00_1:dn	245.673	148.361	122.606
YBR298C::chr00_1:up	93.0246	124.175	81.2792
YBR299W::chr00_17a:up	54.2644	31.8396	32.5117
YBR300C::chr00_1:dn	271.67	330.516	227.429
YBR300C::chr00_1:up	302.33	343.868	357.628
YBR301W::chr00_16a:dn	262.571	269.523	344.419
YBR301W::chr00_16a:up	542.644	687.736	606.885
YCL001W::chr3_1:dn	1347.95	1439.11	1575.15
YCL001W::chr3_1:up	708.021	767.335	845.304
YCL001W-A::chr00_1:dn	266.471	218.421	192.8
YCL001W-A::chr00_1:up	90.4406	79.5991	75.8606
YCL002C::chr3_1:dn	451.051	685.759	627.067
YCL002C::chr3_1:up	214.473	165.566	254.675
YCL005W::chr3_1:dn	149.484	340.407	304.174
YCL005W::chr3_1:up	93.0246	92.3349	75.8606
YCL006C::chr3_1/chr00_12:dn	2091.47	2213.06	1642.54
YCL006C::chr3_1/chr00_12:up	1793.31	1929.48	1679.77
YCL008C::chr3_1:dn	162.482	65.1142	35.565
YCL008C::chr3_1:up	139.537	73.2311	5.41861
YCL009C::chr3_1:dn	794.213	811.042	529.731
YCL009C::chr3_1:up	307.498	474.41	422.652
YCL010C::chr3_1:dn	1418.14	1691.32	1208.27
YCL010C::chr3_1:up	1188.65	1445.52	829.048
YCL011C::chr3_1:dn	582.336	566.246	520.372
YCL011C::chr3_1:up	400.523	445.755	319.698
YCL012W::chr3_1:dn	915.1	886.871	1179.26
YCL012W::chr3_1:up	514.22	792.807	536.443
YCL013W::chr3_1:dn	657.728	682.462	681.35
YCL013W::chr3_1:up	478.043	544.458	352.21
YCL014W::chr3_1:dn	752.618	895.938	852.623
YCL014W::chr3_1:up	255.818	168.75	211.326
YCL016C::chr3_1:dn	235.274	153.307	68.3222
YCL016C::chr3_1:up	64.6004	28.6557	43.3489
YCL022C::chr00_12:dn	178.081	271.172	182.504
YCL022C::chr00_12:up	111.113	130.542	135.465
YCL023C::chr3_1/chr00_12:dn	1022.99	1139.91	1379.55
YCL023C::chr3_1/chr00_12:up	834.638	881.958	921.164
YCL024W::chr3_1:dn	136.485	132.701	68.3222
YCL024W::chr3_1:up	224.81	66.8632	130.047
YCL025C::chr3_1:dn	486.147	358.54	423.036
YCL025C::chr3_1:up	209.305	101.887	113.791
YCL026C::chr3_1:dn	652.529	700.595	717.851
YCL026C::chr3_1:up	144.705	267.453	265.512
YCL026C-A::chr00_16a:dn	464.049	370.903	487.614
YCL026C-A::chr00_16a:up	377.267	557.193	346.791
YCL027W::chr3_1:dn	496.546	465.69	429.587
YCL027W::chr3_1:up	178.297	162.382	173.396
YCL028W::chr3_1:dn	527.742	492.065	464.216
YCL028W::chr3_1:up	157.625	117.807	140.884
YCL029C::chr3_1:dn	1254.36	1183.59	855.431
YCL029C::chr3_1:up	214.473	165.566	108.372
YCL030C::chr3_1:dn	653.829	547.289	604.605
YCL032W::chr3_1:dn	764.316	545.64	692.581
YCL033C::chr3_1:dn	574.537	563.773	686.966
YCL033C::chr3_1:up	240.314	238.797	222.163
YCL034W::chr3_1:dn	10.3989	91.4895	501.653
YCL035C::chr00_11:up	421.195	308.844	493.094
YCL036W::chr3_1:dn	519.943	567.894	555.937
YCL036W::chr3_1:up	534.892	461.675	428.07
YCL037C::chr3_1:dn	1154.27	895.114	822.674
YCL037C::chr3_1:up	728.693	754.599	606.885
YCL038C::chr00_12:dn	36.396	16.4846	19.6543
YCL038C::chr00_12:up	211.889	146.462	140.884
YCL039W::chr3_1:dn	565.438	586.852	637.362
YCL039W::chr3_1:up	219.642	286.557	292.605
YCL040W::chr3_1:dn	834.509	554.707	561.552
YCL042W::chr3_1:dn	1042.49	710.486	765.583
YCL044C::chr3_1:dn	915.1	704.716	728.146
YCL044C::chr3_1:up	304.914	391.627	308.861
YCL045C::chr3_1:dn	471.848	398.927	431.459
YCL045C::chr3_1:up	377.267	468.043	265.512
YCL046W::chr3_1:dn	344.462	296.723	230.236
YCL046W::chr3_1:up	95.6087	127.359	97.535
YCL047C::chr3_1:dn	757.817	680.814	636.426
YCL047C::chr3_1:up	444.451	474.41	466.001
YCL048W::chr3_1:dn	382.158	215.948	212.454
YCL048W::chr3_1:up	93.0246	117.807	189.651
YCL049C::chr3_1:dn	647.329	535.749	586.822
YCL049C::chr3_1:up	346.258	417.099	260.093
YCL050C::chr3_1:dn	1052.88	701.42	1109.07
YCL050C::chr3_1:up	1248.08	1588.8	1463.03
YCL051W::chr3_1:dn	1048.99	797.03	837.649
YCL051W::chr3_1:up	576.236	471.226	455.163
YCL055W::chr3_1:dn	525.143	679.165	582.142
YCL055W::chr3_1:up	139.537	117.807	162.558
YCL056C::chr3_1:dn	334.063	342.055	442.69
YCL056C::chr3_1:up	392.771	410.731	308.861
YCL057W::chr3_1:dn	508.244	536.574	530.667
YCL057W::chr3_1:up	193.801	114.623	92.1164
YCL058C::chr00_12:dn	123.486	74.1807	23.398
YCL058C::chr00_12:up	87.8566	89.151	21.6744
YCL060C::chr3_1:dn	1810.7	1652.58	1349.6
YCL060C::chr3_1:up	651.172	595.401	466.001
YCL061C::chr3_1:dn	523.843	287.656	217.134
YCL061C::chr3_1:up	72.3525	3.18396	59.6047
YCL062W::chr3_1:dn	322.365	302.492	339.739
YCL062W::chr3_1:up	250.65	219.693	124.628
YCL063W::chr3_1:dn	608.333	497.835	418.356
YCL063W::chr3_1:up	118.865	143.278	113.791
YCL064C::chr3_1:dn	668.127	630.536	577.463
YCL064C::chr3_1:up	501.299	426.651	411.815
YCL069W::chr3_1:dn	547.24	663.505	564.36
YCL069W::chr3_1:up	379.851	452.123	395.559
YCL074W::chr00_12:up	472.875	382.076	433.489
YCL075W::chr00_12:dn	803.312	898.41	836.713
YCL075W::chr00_12:up	731.277	617.689	541.861
YCL076W::chr00_12:dn	423.754	352.77	331.316
YCL076W::chr00_12:up	661.509	831.014	731.513
YCR001W::chr3_1:dn	1268.66	1217.39	1294.38
YCR001W::chr3_1:up	108.529	95.5189	70.442
YCR002C::chr3_1:dn	1094.48	1526.47	1389.84
YCR002C::chr3_1:up	1028.44	1193.99	959.094
YCR003W::chr3_1:dn	266.471	273.644	209.646
YCR003W::chr3_1:up	142.121	277.005	233
YCR004C::chr3_1:dn	428.953	602.512	584.014
YCR004C::chr3_1:up	126.617	152.83	27.0931
YCR005C::chr3_1:dn	670.727	746.752	571.847
YCR005C::chr3_1:up	361.762	439.387	308.861
YCR006C::chr3_1:dn	304.167	332.989	243.339
YCR006C::chr3_1:up	116.281	194.222	5.41861
YCR007C::chr3_1:dn	406.856	349.473	342.547
YCR008W::chr3_1:dn	165.082	87.3684	102.951
YCR008W::chr3_1:up	105.945	41.3915	43.3489
YCR009C::chr3_1:dn	25.9972	6.59384	9.3592
YCR010C::chr3_1:dn	2549.02	3099.93	2624.32
YCR010C::chr3_1:up	1976.77	1993.16	1463.03
YCR011C::chr3_1:dn	588.836	451.678	546.577
YCR011C::chr3_1:up	15.5041	226.061	5.41861
YCR014C::chr3_1:dn	577.137	597.567	675.734
YCR014C::chr3_1:up	201.553	184.67	200.489
YCR015C::chr3_1:dn	448.451	336.286	279.84
YCR015C::chr3_1:up	728.693	725.943	558.117
YCR016W::chr3_1:dn	456.25	542.343	451.114
YCR016W::chr3_1:up	369.515	359.788	287.186
YCR017C::chr3_1:dn	1015.19	1011.33	845.136
YCR017C::chr3_1:up	565.9	1146.23	487.675
YCR019W::chr3_1:dn	694.124	797.03	910.65
YCR019W::chr3_1:up	408.275	458.491	444.326
YCR020C::chr3_1:dn	509.544	557.179	458.601
YCR020C::chr3_1:up	382.435	407.547	346.791
YCR020C-A::chr3_1:dn	266.471	339.583	540.962
YCR020C-A::chr3_1:up	173.129	286.557	330.535
YCR020W-B::chr00_1:dn	445.851	390.685	109.503
YCR020W-B::chr00_1:up	82.6886	25.4717	21.6744
YCR021C::chr3_1:dn	448.451	431.072	1950.46
YCR021C::chr3_1:up	359.178	347.052	1625.58
YCR022C::chr3_1:dn	415.955	556.355	411.805
YCR022C::chr3_1:up	470.291	420.283	390.14
YCR023C::chr3_1:dn	432.853	447.557	424.908
YCR023C::chr3_1:up	312.666	264.269	238.419
YCR024C::chr00_1:up	529.724	378.892	579.792
YCR024C-A::chr00_1:dn	330.164	362.661	363.137
YCR024C-A::chr00_1:up	284.242	229.245	335.954
YCR025C::chr00_1:dn	22.0976	8.2423	22.4621
YCR025C::chr00_1:up	108.529	66.8632	102.954
YCR026C::chr00_1:dn	187.18	181.331	143.196
YCR027C::chr00_1:dn	9.09901	20.6057	9.3592
YCR027C::chr00_1:up	348.842	477.594	482.257
YCR028C::chr00_1:dn	855.306	775.6	534.41
YCR028C::chr00_1:up	113.697	19.1038	75.8606
YCR028C-A::chr00_16a:dn	2198.06	2571.6	1734.26
YCR028C-A::chr00_16a:up	702.853	420.283	346.791
YCR030C::chr00_16a:dn	64.9929	32.9692	63.6426
YCR030C::chr00_16a:up	227.394	296.109	254.675
YCR031C::chr00_1:dn	2173.36	1958.37	1509.64
YCR031C::chr00_1:up	669.261	200.59	303.442
YCR032W::chr00_16a:dn	283.369	406.345	410.869
YCR032W::chr00_16a:up	279.074	232.429	211.326
YCR033W::chr00_16a:up	646.004	499.882	449.745
YCR034W::chr00_1:dn	721.421	623.942	554.065
YCR034W::chr00_1:up	108.529	35.0236	92.1164
YCR036W::chr00_1:up	157.625	95.5189	162.558
YCR037C::chr00_1:up	284.242	95.5189	243.838
YCR043C::chr00_1:up	894.07	1028.42	899.49
YCR044C::chr00_1:dn	226.175	250.566	192.8
YCR044C::chr00_1:up	144.705	63.6793	75.8606
YCR045C::chr00_1:up	201.553	254.717	167.977
YCR046C::chr00_16a:dn	28.5969	16.4846	25.2698
YCR046C::chr00_16a:up	1361.78	1556.96	986.187
YCR047C::chr00_16a:up	56.8484	22.2877	16.2558
YCR048W::chr00_16a:dn	1376.55	1413.55	1452.55
YCR048W::chr00_16a:up	315.25	117.807	238.419
YCR049C::chr00_1:dn	271.67	312.383	382.791
YCR049C::chr00_1:up	255.818	114.623	178.814
YCR050C::chr00_1:dn	11.6987	33.7934	3.74368
YCR050C::chr00_1:up	113.697	66.8632	92.1164
YCR051W::chr00_1:dn	1648.22	1658.35	1543.33
YCR051W::chr00_1:up	297.162	133.726	178.814
YCR053W::chr00_16a:up	46.5123	3.18396	0
YCR059C::chr00_1:dn	635.631	361.013	457.665
YCR059C::chr00_1:up	108.529	22.2877	75.8606
YCR060W::chr00_16a:dn	2086.27	2066.34	1931.74
YCR060W::chr00_16a:up	919.91	315.212	368.466
YCR061W::chr00_1:dn	128.686	192.046	114.182
YCR061W::chr00_1:up	191.217	340.684	108.372
YCR062W::chr00_16a:dn	408.155	334.637	365.945
YCR062W::chr00_16a:up	317.834	277.005	205.907
YCR065W::chr00_1:up	832.054	458.491	558.117
YCR066W::chr00_1:up	1589.17	1789.39	1154.16
YCR067C::chr00_16a:up	1899.25	1910.38	2031.98
YCR068W::chr00_1:up	131.785	108.255	135.465
YCR069W::chr00_16a:up	1054.28	1254.48	969.932
YCR071C::chr00_1:up	72.3525	120.991	81.2792
YCR073C::chr00_16a:dn	539.441	624.766	425.844
YCR073C::chr00_16a:up	759.701	936.085	948.257
YCR073W-A::chr00_1:dn	32.4964	23.9027	20.5902
YCR075C::chr00_16a:up	739.029	799.175	666.489
YCR076C::chr00_1:dn	22.0976	14.8361	42.1164
YCR076C::chr00_1:up	749.365	875.59	585.21
YCR077C::chr00_1:dn	239.174	163.198	150.683
YCR077C::chr00_1:up	170.545	159.198	124.628
YCR079W::chr00_1:dn	419.854	276.117	472.64
YCR079W::chr00_1:up	366.931	401.179	411.815
YCR081W::chr00_1:dn	607.034	337.934	159.106
YCR081W::chr00_1:up	260.986	63.6793	48.7675
YCR082W::chr00_1:up	281.658	273.821	195.07
YCR083W::chr00_16a:dn	562.838	937.974	770.262
YCR083W::chr00_16a:up	359.178	652.712	460.582
YCR085W::chr00_1:dn	29.8967	12.3634	23.398
YCR085W::chr00_1:up	514.22	585.849	612.303
YCR086W::chr00_1:dn	201.478	160.725	66.4503
YCR086W::chr00_1:up	307.498	181.486	119.209
YCR087C-A::chr00_1:dn	133.885	55.2234	73.0018
YCR087C-A::chr00_1:up	31.0082	15.9198	32.5117
YCR087W::chr00_1:up	105.945	60.4953	70.442
YCR088W::chr00_16a:dn	270.37	145.889	165.658
YCR088W::chr00_16a:up	214.473	152.83	276.349
YCR089W::chr00_16a:dn	183.28	166.494	164.722
YCR089W::chr00_16a:up	80.1045	57.3113	81.2792
YCR090C::chr00_2:dn	197.578	200.288	222.749
YCR090C::chr00_2:up	583.988	764.151	709.838
YCR091W::chr00_2:up	400.523	273.821	379.303
YCR092C::chr00_2:dn	59.7935	75.8291	85.1687
YCR092C::chr00_2:up	728.693	859.67	514.768
YCR094W::chr00_2:dn	79.2913	39.563	63.6426
YCR094W::chr00_2:up	224.81	175.118	135.465
YCR095C::chr00_14:up	323.002	219.693	162.558
YCR098C::chr00_2:dn	5.19943	0.82423	10.2951
YCR098C::chr00_2:up	240.314	232.429	184.233
YCR099C::chr00_2:up	351.426	305.66	346.791
YCR100C::chr00_2:dn	505.645	548.113	498.846
YCR100C::chr00_2:up	901.822	859.67	839.885
YCR101C::chr00_2:up	253.234	299.292	292.605
YCR102C::chr00_2:up	281.658	197.406	281.768
YCR102W-A::chr00_14:dn	548.54	633.833	634.554
YCR102W-A::chr00_14:up	400.523	299.292	346.791
YCR105W::chr00_2:up	731.277	620.873	655.652
YCR106W::chr00_2:up	620.164	633.609	650.233
YCR107W::chr00_17a:dn	293.768	353.595	273.289
YCR107W::chr00_17a:up	67.1845	44.5755	75.8606
YDL002C::chr4_1:dn	154.683	189.573	89.8483
YDL002C::chr4_1:up	38.7603	57.3113	32.5117
YDL006W::chr4_1:dn	259.972	388.212	382.791
YDL006W::chr4_1:up	354.01	404.363	276.349
YDL009C::chr4_1:dn	452.351	854.726	794.596
YDL009C::chr4_1:up	447.035	490.33	531.024
YDL010W::chr4_1:dn	332.764	475.581	311.661
YDL010W::chr4_1:up	183.465	133.726	119.209
YDL011C::chr4_1:dn	319.765	248.093	286.392
YDL011C::chr4_1:up	242.898	308.844	151.721
YDL012C::chr4_1:dn	492.646	463.217	408.997
YDL012C::chr4_1:up	571.068	585.849	753.187
YDL013W::chr4_1:dn	55.8939	51.9265	6.55144
YDL013W::chr4_1:up	59.4324	15.9198	0
YDL018C::chr4_1:dn	305.467	295.899	208.71
YDL018C::chr4_1:up	341.09	452.123	346.791
YDL019C::chr4_1:dn	319.765	328.043	253.634
YDL019C::chr4_1:up	28.4242	22.2877	10.8372
YDL020C::chr4_1:dn	311.966	182.979	131.965
YDL020C::chr4_1:up	201.553	168.75	37.9303
YDL021W::chr4_1:dn	980.093	862.969	791.789
YDL021W::chr4_1:up	372.099	585.849	395.559
YDL022W::chr4_1:dn	461.45	126.931	90.7843
YDL022W::chr4_1:up	54.2644	31.8396	0
YDL023C::chr4_1:dn	5341.12	2915.3	2524.18
YDL023C::chr4_1:up	1803.64	1442.34	70.442
YDL024C::chr4_1:dn	678.526	484.647	617.707
YDL024C::chr4_1:up	338.506	404.363	541.861
YDL025C::chr4_1:dn	642.13	307.438	560.616
YDL025C::chr4_1:up	175.713	149.646	151.721
YDL026W::chr4_1:dn	574.537	513.495	393.087
YDL026W::chr4_1:up	279.074	347.052	233
YDL027C::chr4_1:dn	426.353	464.866	348.162
YDL027C::chr4_1:up	198.969	206.958	162.558
YDL032W::chr4_1:dn	2308.55	4079.94	3262.62
YDL032W::chr4_1:up	674.429	792.807	861.559
YDL033C::chr4_1:dn	1441.54	1701.21	1462.84
YDL033C::chr4_1:up	1033.61	1079.36	1083.72
YDL034W::chr4_1:dn	337.963	307.438	260.186
YDL034W::chr4_1:up	160.209	92.3349	86.6978
YDL035C::chr4_1:dn	1068.48	714.607	618.643
YDL036C::chr4_1:dn	340.563	230.784	372.496
YDL036C::chr4_1:up	385.019	522.17	368.466
YDL037C::chr4_1:dn	480.947	581.906	535.346
YDL037C::chr4_1:up	351.426	531.722	363.047
YDL038C::chr4_1:dn	434.153	426.951	540.962
YDL038C::chr4_1:up	183.465	184.67	173.396
YDL039C::chr4_1:dn	781.215	855.551	911.586
YDL039C::chr4_1:up	839.806	843.75	736.931
YDL040C::chr4_1:dn	1670.32	1732.53	1459.1
YDL040C::chr4_1:up	1056.86	1123.94	655.652
YDL041W::chr4_1:dn	154.683	73.3565	41.1805
YDL041W::chr4_1:up	111.113	85.967	27.0931
YDL044C::chr4_1:up	1723.54	2155.54	1257.12
YDL045W-A::chr4_1:dn	1805.5	2046.56	1366.44
YDL046W::chr4_1:dn	699.324	744.28	632.682
YDL046W::chr4_1:up	240.314	181.486	189.651
YDL047W::chr4_1:dn	1084.08	614.875	335.995
YDL047W::chr4_1:up	126.617	98.7028	21.6744
YDL048C::chr4_1:up	24519.7	31164.6	38423.4
YDL049C::chr4_1:dn	289.868	208.53	330.38
YDL049C::chr4_1:up	289.41	305.66	341.373
YDL050C::chr4_1:dn	640.83	629.712	524.115
YDL050C::chr4_1:up	408.275	299.292	281.768
YDL051W::chr4_1:dn	656.428	708.013	543.77
YDL051W::chr4_1:up	423.779	557.193	433.489
YDL052C::chr4_1:dn	516.044	429.424	414.613
YDL052C::chr4_1:up	328.17	515.802	493.094
YDL053C::chr4_1:dn	118.287	256.335	264.865
YDL053C::chr4_1:up	113.697	101.887	86.6978
YDL054C::chr4_1:dn	587.536	564.597	533.475
YDL054C::chr4_1:up	392.771	378.892	292.605
YDL056W::chr4_1:dn	1594.93	1714.4	1234.48
YDL056W::chr4_1:up	410.859	897.877	460.582
YDL057W::chr4_1:dn	530.342	466.514	433.331
YDL057W::chr4_1:up	323.002	302.476	325.117
YDL059C::chr4_1:dn	617.432	505.253	708.492
YDL059C::chr4_1:up	266.154	315.212	346.791
YDL061C::chr4_1:dn	1485.74	2041.62	2366.01
YDL061C::chr4_1:up	1056.86	1318.16	1398
YDL062W::chr4_1:dn	913.8	740.158	653.272
YDL062W::chr4_1:up	532.308	585.849	352.21
YDL063C::chr4_1:dn	1688.52	1716.05	1582.64
YDL063C::chr4_1:up	2095.64	2203.3	1197.51
YDL065C::chr4_1:dn	306.766	265.402	219.941
YDL065C::chr4_1:up	56.8484	82.783	75.8606
YDL066W::chr4_1:dn	561.539	478.878	479.191
YDL066W::chr4_1:up	224.81	181.486	227.582
YDL067C::chr4_1:dn	183.28	209.354	102.015
YDL067C::chr4_1:up	108.529	82.783	32.5117
YDL068W::chr4_1:dn	3724.09	5051.7	4816.25
YDL068W::chr4_1:up	1436.71	2098.23	1820.65
YDL069C::chr4_1:dn	5706.38	7474.12	7766.27
YDL069C::chr4_1:up	2320.45	3174.41	3321.61
YDL070W::chr4_1:dn	766.916	647.02	603.669
YDL070W::chr4_1:up	294.578	248.349	195.07
YDL071C::chr4_1:dn	525.143	759.116	376.24
YDL071C::chr4_1:up	325.586	439.387	200.489
YDL072C::chr4_1:dn	1282.96	1889.13	1908.34
YDL072C::chr4_1:up	1043.94	1127.12	1197.51
YDL073W::chr4_1:dn	1150.37	1748.19	1537.72
YDL073W::chr4_1:up	152.457	82.783	81.2792
YDL074C::chr4_1:dn	1366.15	1496.8	1070.69
YDL074C::chr4_1:up	713.189	719.576	596.047
YDL075W::chr4_1:dn	61.0933	20.6057	5.61552
YDL075W::chr4_1:up	69.7685	15.9198	10.8372
YDL076C::chr4_1:dn	1151.67	1087.98	1077.24
YDL076C::chr4_1:up	963.839	942.453	666.489
YDL077C::chr4_1:dn	59.7935	38.7388	17.7825
YDL077C::chr4_1:up	152.457	133.726	32.5117
YDL078C::chr4_1:dn	6054.74	6616.92	6441.94
YDL078C::chr4_1:up	3666.72	5527.36	4177.75
YDL079C::chr4_1:dn	1125.68	1402.01	1204.53
YDL079C::chr4_1:up	865.646	987.028	1099.98
YDL080C::chr4_1:dn	995.691	1172.05	1019.22
YDL080C::chr4_1:up	222.226	321.58	319.698
YDL081C::chr4_1:dn	2723.2	2279.82	1402.01
YDL081C::chr4_1:up	1708.04	1668.4	780.28
YDL082W::chr4_1:dn	686.325	496.186	288.263
YDL082W::chr4_1:up	462.539	337.5	195.07
YDL083C::chr4_1:dn	389.957	148.361	152.555
YDL083C::chr4_1:up	416.027	270.637	200.489
YDL085W::chr4_1:dn	293.768	416.236	350.97
YDL085W::chr4_1:up	165.377	251.533	157.14
YDL086W::chr4_1:dn	651.229	399.751	569.04
YDL086W::chr4_1:up	286.826	292.925	422.652
YDL088C::chr4_1:dn	668.127	715.431	626.131
YDL088C::chr4_1:up	421.195	439.387	352.21
YDL089W::chr4_1:dn	444.551	574.488	475.448
YDL089W::chr4_1:up	594.324	792.807	904.908
YDL090C::chr4_1:dn	115.687	31.3207	14.0388
YDL090C::chr4_1:up	113.697	50.9434	0
YDL091C::chr4_1:dn	707.123	914.895	695.389
YDL091C::chr4_1:up	302.33	362.972	298.024
YDL093W::chr4_1:dn	569.338	489.593	655.144
YDL093W::chr4_1:up	532.308	378.892	509.35
YDL094C::chr4_1:dn	622.632	629.712	709.428
YDL094C::chr4_1:up	294.578	280.189	308.861
YDL095W::chr4_1:dn	1680.72	1875.12	2356.65
YDL095W::chr4_1:up	1186.06	1983.61	1603.91
YDL096C::chr4_2:dn	1376.55	1815.78	2067.45
YDL096C::chr4_2:up	1434.13	2063.21	1988.63
YDL099W::chr4_2:dn	443.252	511.847	538.154
YDL099W::chr4_2:up	121.449	85.967	130.047
YDL100C::chr4_2:dn	365.26	464.041	386.535
YDL100C::chr4_2:up	405.691	573.113	243.838
YDL101C::chr4_2:dn	796.813	665.978	779.622
YDL101C::chr4_2:up	465.123	241.981	314.28
YDL104C::chr4_2:dn	478.348	717.08	663.567
YDL104C::chr4_2:up	343.674	659.08	579.792
YDL106C::chr4_2:dn	483.547	188.749	63.6426
YDL106C::chr4_2:up	77.5205	3.18396	0
YDL107W::chr4_2:dn	198.878	342.055	391.215
YDL109C::chr4_2:dn	742.219	849.781	862.919
YDL109C::chr4_2:up	788.125	862.854	921.164
YDL110C::chr4_2:dn	436.752	790.436	580.271
YDL110C::chr4_2:up	359.178	378.892	514.768
YDL112W::chr4_2:dn	279.469	325.571	281.712
YDL112W::chr4_2:up	320.418	388.443	363.047
YDL113C::chr4_2:dn	292.468	424.478	381.855
YDL113C::chr4_2:up	2.58402	474.41	460.582
YDL114W::chr4_2:dn	616.133	590.149	671.991
YDL114W::chr4_2:up	276.49	267.453	205.907
YDL115C::chr4_2:dn	630.431	273.644	222.749
YDL115C::chr4_2:up	162.793	89.151	37.9303
YDL116W::chr4_2:dn	123.486	79.1261	12.167
YDL116W::chr4_2:up	95.6087	66.8632	43.3489
YDL117W::chr4_2:dn	630.431	407.17	329.444
YDL117W::chr4_2:up	142.121	133.726	81.2792
YDL118W::chr4_2:dn	3513.52	4401.39	6126.53
YDL118W::chr4_2:up	3922.54	6320.17	7277.2
YDL119C::chr4_2:dn	5086.34	7785.67	8909.03
YDL119C::chr4_2:up	1855.32	2926.06	3402.89
YDL121C::chr4_2:dn	610.933	630.536	622.387
YDL121C::chr4_2:up	423.779	267.453	390.14
YDL122W::chr4_2:dn	84.4908	98.0833	70.194
YDL122W::chr4_2:up	214.473	210.142	70.442
YDL123W::chr4_2:dn	969.694	391.509	932.177
YDL123W::chr4_2:up	310.082	480.778	335.954
YDL124W::chr4_2:dn	261.271	328.043	314.469
YDL124W::chr4_2:up	147.289	191.038	157.14
YDL125C::chr4_2:dn	358.761	244.796	233.98
YDL125C::chr4_2:up	286.826	229.245	189.651
YDL127W::chr4_2:dn	410.755	425.303	308.854
YDL127W::chr4_2:up	144.705	146.462	113.791
YDL128W::chr4_2:dn	543.341	625.59	488.55
YDL129W::chr4_2:dn	11.6987	25.5511	920.946
YDL129W::chr4_2:up	253.234	318.396	292.605
YDL130W::chr4_2:dn	7545.68	9137.41	9146.75
YDL130W::chr4_2:up	1638.27	2123.7	2194.54
YDL130W-A::chr00_2:dn	1091.88	1594.06	1234.48
YDL130W-A::chr00_2:up	1343.69	1674.76	1170.42
YDL131W::chr4_2:dn	695.424	620.645	807.699
YDL131W::chr4_2:up	490.963	614.505	487.675
YDL133C-A::chr00_14:up	410.859	407.547	400.977
YDL133W::chr4_2:dn	638.23	534.925	478.255
YDL133W::chr4_2:up	209.305	318.396	281.768
YDL134C::chr4_2:dn	171.581	252.214	205.902
YDL134C::chr4_2:up	111.113	66.8632	97.535
YDL134C-A::chr4_2:dn	669.427	602.512	605.54
YDL134C-A::chr4_2:up	475.459	356.604	325.117
YDL135C::chr4_2:dn	462.749	516.792	568.104
YDL135C::chr4_2:up	346.258	445.755	417.233
YDL136W::chr4_2:dn	5450.3	6157.82	7610.9
YDL136W::chr4_2:up	4423.84	6367.93	5722.05
YDL137W::chr4_2:dn	634.331	688.232	711.299
YDL137W::chr4_2:up	372.099	382.076	363.047
YDL138W::chr4_2:dn	839.708	1032.76	1264.43
YDL138W::chr4_2:up	219.642	229.245	319.698
YDL142C::chr4_2:dn	605.734	790.436	764.647
YDL142C::chr4_2:up	478.043	687.736	503.931
YDL144C::chr4_2:dn	681.126	752.522	949.023
YDL144C::chr4_2:up	390.187	483.962	357.628
YDL146W::chr4_2:dn	314.566	257.984	167.53
YDL146W::chr4_2:up	69.7685	76.4151	37.9303
YDL149W::chr4_2:dn	636.93	941.27	881.637
YDL149W::chr4_2:up	237.73	261.085	325.117
YDL154W::chr4_2:dn	3959.37	5205.84	4861.17
YDL154W::chr4_2:up	3201.6	3655.19	3467.91
YDL155W::chr4_2:dn	466.649	493.714	409.933
YDL155W::chr4_2:up	214.473	203.774	357.628
YDL156W::chr4_2:dn	630.431	673.396	676.67
YDL156W::chr4_2:up	462.539	627.241	373.884
YDL157C::chr4_2:dn	922.899	1373.17	1293.44
YDL157C::chr4_2:up	369.515	544.458	590.629
YDL160C::chr4_2:dn	167.682	101.38	106.695
YDL160C::chr4_2:up	134.369	70.0472	32.5117
YDL161W::chr4_2:dn	435.452	547.289	603.669
YDL161W::chr4_2:up	426.363	799.175	563.536
YDL162C::chr4_2:dn	2026.48	1768.8	1979.47
YDL162C::chr4_2:up	733.861	681.368	736.931
YDL167C::chr4_2:dn	614.833	867.09	761.839
YDL167C::chr4_2:up	441.867	566.745	471.419
YDL168W::chr4_2:dn	197.578	249.742	292.943
YDL168W::chr4_2:up	330.754	518.986	422.652
YDL169C::chr4_2:dn	207.977	282.711	197.479
YDL169C::chr4_2:up	310.082	321.58	233
YDL170W::chr4_2:dn	597.935	836.593	781.493
YDL170W::chr4_2:up	237.73	388.443	384.721
YDL171C::chr4_2:dn	23.3974	4.12115	18.7184
YDL171C::chr4_2:up	555.564	550.826	579.792
YDL172C::chr4_2:dn	129.986	93.9622	83.2969
YDL172C::chr4_2:up	343.674	668.632	433.489
YDL173W::chr4_2:dn	137.785	141.768	189.056
YDL173W::chr4_2:up	320.418	391.627	373.884
YDL174C::chr4_2:dn	353.561	264.578	283.584
YDL174C::chr4_2:up	175.713	257.901	238.419
YDL175C::chr4_2:dn	100.089	83.2472	84.2328
YDL176W::chr4_2:dn	101.389	80.7745	98.2716
YDL176W::chr4_2:up	723.525	1047.52	715.257
YDL177C::chr4_2:dn	386.058	293.426	289.199
YDL177C::chr4_2:up	695.101	748.231	671.908
YDL178W::chr4_2:dn	204.078	203.585	228.365
YDL178W::chr4_2:up	284.242	401.179	379.303
YDL179W::chr4_2:dn	159.883	116.216	129.157
YDL179W::chr4_2:up	328.17	429.835	325.117
YDL180W::chr4_2:dn	209.277	150.01	138.516
YDL180W::chr4_2:up	211.889	362.972	205.907
YDL182W::chr4_2:dn	409.455	329.692	326.636
YDL182W::chr4_2:up	806.214	885.142	807.373
YDL183C::chr4_2:dn	9.09901	4.94538	11.231
YDL183C::chr4_2:up	131.785	140.094	308.861
YDL184C::chr4_2:dn	124.786	117.865	144.132
YDL184C::chr4_2:up	400.523	280.189	471.419
YDL185W::chr4_2:dn	45.495	23.9027	16.8466
YDL185W::chr4_2:up	90.4406	22.2877	16.2558
YDL186W::chr4_2:dn	162.482	149.186	156.299
YDL186W::chr4_2:up	400.523	347.052	265.512
YDL187C::chr4_2:dn	196.279	106.326	152.555
YDL187C::chr4_2:up	467.707	611.321	422.652
YDL188C::chr4_2:dn	375.659	319.801	423.972
YDL188C::chr4_2:up	302.33	337.5	211.326
YDL189W::chr4_2:dn	369.16	361.837	424.908
YDL189W::chr4_2:up	883.734	1636.56	1170.42
YDL190C::chr4_2:dn	453.65	277.765	327.572
YDL190C::chr4_2:up	1116.3	916.981	1240.86
YDL191W::chr4_3:dn	1424.64	1136.61	936.856
YDL191W::chr4_3:up	418.611	324.764	243.838
YDL192W::chr4_3:dn	1110.08	956.107	411.805
YDL192W::chr4_3:up	129.201	66.8632	205.907
YDL194W::chr00_16b:dn	5838.96	7372.74	7991.82
YDL194W::chr00_16b:up	8416.15	11325.4	12625.4
YDL197C::chr4_3:dn	397.757	293.426	335.995
YDL197C::chr4_3:up	237.73	305.66	379.303
YDL198C::chr4_3:dn	928.099	1083.04	791.789
YDL198C::chr4_3:up	813.966	1299.06	791.117
YDL199C::chr4_3:dn	644.73	573.664	743.121
YDL199C::chr4_3:up	286.826	248.349	520.187
YDL200C::chr4_3:dn	213.177	237.378	239.596
YDL200C::chr4_3:up	966.423	920.165	671.908
YDL201W::chr4_3:dn	471.848	331.34	443.626
YDL201W::chr4_3:up	271.322	289.741	238.419
YDL202W::chr4_3:dn	1983.58	1975.68	1930.8
YDL202W::chr4_3:up	1426.38	2582.19	1782.72
YDL203C::chr4_3:dn	776.015	730.268	798.34
YDL203C::chr4_3:up	377.267	362.972	352.21
YDL204W::chr4_3:dn	366.56	337.934	337.867
YDL204W::chr4_3:up	219.642	216.509	233
YDL210W::chr4_3:dn	2572.42	2395.21	2932.24
YDL210W::chr4_3:up	3028.47	3190.33	2861.03
YDL211C::chr4_3:dn	311.966	154.955	343.483
YDL211C::chr4_3:up	204.137	324.764	319.698
YDL213C::chr4_3:dn	70.1923	43.6842	61.7707
YDL213C::chr4_3:up	23.2562	44.5755	10.8372
YDL214C::chr4_3:dn	148.184	145.889	189.056
YDL215C::chr4_3:dn	456.25	406.345	321.021
YDL215C::chr4_3:up	307.498	366.156	352.21
YDL216C::chr4_3:dn	383.458	361.837	371.56
YDL216C::chr4_3:up	186.049	178.302	178.814
YDL218W::chr4_3:dn	343.162	245.62	303.238
YDL218W::chr4_3:up	178.297	200.59	92.1164
YDL219W::chr4_3:dn	327.564	403.048	333.188
YDL219W::chr4_3:up	284.242	299.292	281.768
YDL222C::chr4_3:dn	538.141	417.06	479.191
YDL222C::chr4_3:up	578.82	525.354	633.978
YDL223C::chr4_3:dn	118.287	96.4349	70.194
YDL223C::chr4_3:up	165.377	146.462	162.558
YDL224C::chr4_3:dn	362.66	306.613	252.698
YDL224C::chr4_3:up	250.65	270.637	238.419
YDL225W::chr4_3:dn	185.88	142.592	176.889
YDL225W::chr4_3:up	121.449	168.75	108.372
YDL226C::chr4_3:dn	114.387	154.131	114.182
YDL226C::chr4_3:up	74.9365	41.3915	65.0233
YDL227C::chr4_3:dn	592.735	595.918	784.301
YDL227C::chr4_3:up	563.316	569.929	579.792
YDL229W::chr4_3:dn	172.881	189.573	243.339
YDL229W::chr4_3:up	162.793	184.67	195.07
YDL230W::chr4_3:dn	344.462	495.362	574.655
YDL230W::chr4_3:up	343.674	273.821	200.489
YDL231C::chr4_3:dn	85.7906	49.4538	58.963
YDL231C::chr4_3:up	410.859	404.363	363.047
YDL233W::chr4_3:dn	75.3918	41.2115	79.5532
YDL233W::chr4_3:up	229.978	222.877	222.163
YDL234C::chr4_3:dn	223.576	178.858	197.479
YDL234C::chr4_3:up	289.41	152.83	205.907
YDL236W::chr4_3:dn	202.778	156.604	69.2581
YDL236W::chr4_3:up	397.939	487.146	205.907
YDL237W::chr4_3:dn	207.977	281.062	218.069
YDL237W::chr4_3:up	289.41	312.028	335.954
YDL238C::chr4_3:dn	266.471	251.39	269.545
YDL238C::chr4_3:up	82.6886	60.4953	43.3489
YDL239C::chr4_3:dn	562.838	618.997	486.679
YDL239C::chr4_3:up	307.498	6.36793	249.256
YDL240W::chr4_3:dn	308.066	225.839	153.491
YDL240W::chr4_3:up	361.762	308.844	341.373
YDL241W::chr4_3:up	51.6804	31.8396	140.884
YDL242W::chr4_3:dn	447.151	283.535	317.277
YDL242W::chr4_3:up	325.586	283.373	260.093
YDL243C::chr4_3:dn	113.088	159.901	138.516
YDL243C::chr4_3:up	72.3525	101.887	92.1164
YDR001C::chr4_3:dn	132.586	72.5322	74.8736
YDR001C::chr4_3:up	98.1927	124.175	119.209
YDR003W::chr4_3:dn	427.653	288.48	354.714
YDR003W::chr4_3:up	211.889	283.373	178.814
YDR004W::chr4_3:dn	868.305	693.177	536.282
YDR004W::chr4_3:up	410.859	308.844	205.907
YDR005C::chr4_3:dn	62.3932	62.6415	90.7843
YDR005C::chr4_3:up	129.201	187.854	167.977
YDR006C::chr4_3:dn	314.566	245.62	222.749
YDR006C::chr4_3:up	214.473	191.038	184.233
YDR007W::chr00_16b:dn	308.066	254.687	254.57
YDR007W::chr00_16b:up	124.033	206.958	151.721
YDR008C::chr4_3:dn	318.465	327.219	301.366
YDR008C::chr4_3:up	149.873	149.646	97.535
YDR009W::chr4_3:dn	497.846	472.284	430.523
YDR009W::chr4_3:up	291.994	184.67	140.884
YDR010C::chr4_3:dn	378.259	391.509	388.407
YDR010C::chr4_3:up	542.644	452.123	373.884
YDR011W::chr4_3:dn	545.94	446.733	450.178
YDR011W::chr4_3:up	589.156	493.514	417.233
YDR014W::chr4_3:dn	471.848	487.12	391.215
YDR014W::chr4_3:up	586.572	522.17	227.582
YDR015C::chr4_3:dn	291.168	197.815	292.007
YDR015C::chr4_3:up	395.355	388.443	406.396
YDR017C::chr4_3:dn	539.441	154.955	100.143
YDR017C::chr4_3:up	410.859	117.807	59.6047
YDR018C::chr4_3:dn	44.1952	14.8361	16.8466
YDR018C::chr4_3:up	289.41	503.066	303.442
YDR019C::chr4_3:dn	482.247	501.956	466.088
YDR019C::chr4_3:up	307.498	506.25	330.535
YDR020C::chr4_3:dn	726.621	927.259	527.859
YDR020C::chr4_3:up	563.316	576.297	195.07
YDR022C::chr4_3:dn	526.442	492.065	622.387
YDR022C::chr4_3:up	180.881	238.797	211.326
YDR024W::chr4_3:dn	703.223	464.041	466.088
YDR024W::chr4_3:up	382.435	318.396	260.093
YDR025W::chr4_3:dn	288.568	163.198	183.44
YDR025W::chr4_3:up	359.178	433.019	233
YDR026C::chr4_3:dn	180.68	121.986	171.273
YDR026C::chr4_3:up	348.842	420.283	303.442
YDR028C::chr4_3:up	16819.4	16932.3	22920.7
YDR029W::chr4_3:dn	386.058	243.972	380.92
YDR029W::chr4_3:up	1514.23	1703.42	1490.12
YDR030C::chr4_3:dn	348.362	375.849	321.957
YDR030C::chr4_3:up	276.49	308.844	260.093
YDR031W::chr4_3:dn	370.459	314.856	321.021
YDR031W::chr4_3:up	594.324	745.047	633.978
YDR032C::chr4_3:dn	162.482	107.15	125.413
YDR032C::chr4_3:up	325.586	289.741	157.14
YDR033W::chr4_3:dn	122.187	120.338	149.747
YDR033W::chr4_3:up	627.916	630.425	541.861
YDR034C::chr4_3:dn	49.3946	27.1996	44.9242
YDR034C::chr4_3:up	95.6087	19.1038	10.8372
YDR035W::chr4_3:dn	98.7892	42.86	82.361
YDR035W::chr4_3:up	441.867	506.25	471.419
YDR036C::chr4_3:dn	435.452	435.193	433.331
YDR036C::chr4_3:up	129.201	216.509	205.907
YDR042C::chr4_3:dn	139.085	104.677	76.7455
YDR042C::chr4_3:up	82.6886	133.726	86.6978
YDR043C::chr4_3:dn	1019.09	1473.72	2129.22
YDR043C::chr4_3:up	1103.38	1369.1	1511.79
YDR046C::chr4_3:dn	605.734	112.919	151.619
YDR046C::chr4_3:up	449.619	458.491	249.256
YDR048C::chr00_16b:dn	293.768	231.609	220.877
YDR048C::chr00_16b:up	100.777	146.462	48.7675
YDR049W::chr4_4:dn	1425.94	1352.56	1344.92
YDR049W::chr4_4:up	1485.81	1299.06	1105.4
YDR051C::chr4_4:dn	159.883	161.549	148.811
YDR051C::chr4_4:up	333.338	324.764	352.21
YDR055W::chr4_4:dn	67.5926	54.3992	61.7707
YDR055W::chr4_4:up	105.945	152.83	119.209
YDR056C::chr4_4:dn	176.781	162.373	181.569
YDR056C::chr4_4:up	258.402	302.476	254.675
YDR057W::chr4_4:dn	136.485	76.6534	80.4891
YDR057W::chr4_4:up	170.545	200.59	167.977
YDR058C::chr00_14:up	188.633	108.255	119.209
YDR059C::chr4_4:dn	375.659	322.274	364.073
YDR059C::chr4_4:up	483.211	429.835	536.443
YDR061W::chr4_4:dn	209.277	234.081	243.339
YDR061W::chr4_4:up	418.611	388.443	325.117
YDR063W::chr4_4:dn	223.576	194.518	236.788
YDR063W::chr4_4:up	93.0246	95.5189	146.303
YDR065W::chr4_4:dn	361.36	347.001	517.564
YDR065W::chr4_4:up	2431.56	3935.38	3359.54
YDR066C::chr4_4:dn	178.081	300.02	302.302
YDR066C::chr4_4:up	514.22	633.609	536.443
YDR067C::chr4_4:dn	497.846	347.825	245.211
YDR067C::chr4_4:up	651.172	617.689	157.14
YDR068W::chr4_4:dn	477.048	458.272	388.407
YDR068W::chr4_4:up	478.043	499.882	444.326
YDR069C::chr4_4:dn	12.9986	14.8361	4.6796
YDR069C::chr4_4:up	62.0164	63.6793	16.2558
YDR070C::chr4_4:dn	81.891	55.2234	70.194
YDR070C::chr4_4:up	160.209	143.278	119.209
YDR071C::chr00_11:dn	551.14	693.177	736.569
YDR071C::chr00_11:up	537.476	681.368	785.699
YDR072C::chr4_4:dn	102.689	65.1142	84.2328
YDR072C::chr4_4:up	542.644	1073	769.443
YDR073W::chr4_4:dn	1043.79	1328.66	1339.3
YDR073W::chr4_4:up	1640.85	1509.2	1544.3
YDR074W::chr00_11:dn	1496.14	1266.84	945.28
YDR074W::chr00_11:up	578.82	439.387	319.698
YDR075W::chr4_4:dn	188.479	276.117	403.382
YDR075W::chr4_4:up	67.1845	136.91	146.303
YDR076W::chr4_4:dn	600.534	778.073	464.216
YDR076W::chr4_4:up	1571.08	1693.87	953.676
YDR077W::chr4_4:dn	383.458	296.723	426.78
YDR077W::chr4_4:up	1007.77	1184.43	856.141
YDR078C::chr4_4:dn	245.673	158.252	270.481
YDR078C::chr4_4:up	260.986	448.939	292.605
YDR080W::chr4_4:dn	279.469	128.58	87.9765
YDR080W::chr4_4:up	144.705	200.59	86.6978
YDR083W::chr4_4:dn	36.396	14.0119	15.9106
YDR083W::chr4_4:up	229.978	114.623	70.442
YDR084C::chr4_4:dn	280.769	168.143	270.481
YDR084C::chr4_4:up	359.178	327.948	238.419
YDR085C::chr4_4:dn	490.046	343.704	489.486
YDR085C::chr4_4:up	596.908	611.321	596.047
YDR089W::chr4_4:up	555.564	620.873	677.327
YDR090C::chr4_4:dn	483.547	391.509	452.05
YDR090C::chr4_4:up	622.748	531.722	612.303
YDR092W::chr4_4:dn	2753.1	2971.35	2554.13
YDR093W::chr4_4:dn	392.557	418.709	413.677
YDR093W::chr4_4:up	330.754	305.66	346.791
YDR094W::chr4_4:dn	620.032	539.871	583.078
YDR094W::chr4_4:up	428.947	506.25	400.977
YDR095C::chr4_4:dn	155.983	93.138	188.12
YDR095C::chr4_4:up	759.701	706.84	726.094
YDR096W::chr4_4:dn	345.762	225.015	219.941
YDR096W::chr4_4:up	377.267	296.109	227.582
YDR097C::chr4_4:dn	159.883	164.846	246.147
YDR097C::chr4_4:up	426.363	604.953	444.326
YDR098C::chr4_4:dn	241.774	188.749	246.147
YDR098C::chr4_4:up	315.25	404.363	260.093
YDR099W::chr4_4:dn	61.0933	51.9265	35.565
YDR099W::chr4_4:up	196.385	184.67	102.954
YDR100W::chr4_4:dn	193.679	154.955	243.339
YDR100W::chr4_4:up	351.426	697.288	552.698
YDR101C::chr4_4:dn	168.982	120.338	116.99
YDR101C::chr4_4:up	744.197	566.745	319.698
YDR102C::chr4_4:dn	452.351	445.908	476.383
YDR102C::chr4_4:up	338.506	321.58	178.814
YDR104C::chr4_4:dn	166.382	193.694	206.838
YDR104C::chr4_4:up	485.795	468.043	411.815
YDR105C::chr4_4:dn	408.155	312.383	366.881
YDR107C::chr4_4:dn	145.584	156.604	248.019
YDR107C::chr4_4:up	447.035	296.109	547.28
YDR108W::chr4_4:dn	98.7892	68.4111	110.439
YDR108W::chr4_4:up	235.146	378.892	238.419
YDR109C::chr4_4:dn	235.274	255.511	338.803
YDR109C::chr4_4:up	488.379	356.604	319.698
YDR110W::chr4_4:dn	81.891	53.5749	56.1552
YDR110W::chr4_4:up	351.426	359.788	357.628
YDR111C::chr4_4:dn	176.781	153.307	219.941
YDR111C::chr4_4:up	297.162	267.453	379.303
YDR112W::chr4_4:dn	444.551	298.371	495.102
YDR112W::chr4_4:up	480.627	627.241	498.512
YDR114C::chr4_4:dn	1805.5	1935.29	1995.38
YDR114C::chr4_4:up	1173.14	1400.94	861.559
YDR115W::chr4_4:dn	516.044	353.595	350.034
YDR115W::chr4_4:up	927.662	1286.32	948.257
YDR116C::chr4_4:dn	436.752	506.077	744.993
YDR116C::chr4_4:up	392.771	589.033	671.908
YDR117C::chr4_4:dn	374.359	406.345	353.778
YDR117C::chr4_4:up	196.385	213.325	216.744
YDR119W::chr4_4:dn	19.4979	7.41807	71.1299
YDR119W::chr4_4:up	284.242	321.58	270.931
YDR120C::chr4_4:dn	235.274	216.772	128.221
YDR120C::chr4_4:up	217.057	241.981	140.884
YDR121W::chr4_4:dn	321.065	270.347	256.442
YDR121W::chr4_4:up	811.382	971.109	644.815
YDR122W::chr4_4:up	413.443	292.925	216.744
YDR123C::chr4_4:dn	114.387	95.6107	200.287
YDR123C::chr4_4:up	348.842	429.835	455.163
YDR124W::chr4_4:dn	276.87	277.765	218.069
YDR124W::chr4_4:up	170.545	251.533	276.349
YDR125C::chr4_4:dn	679.826	355.243	286.392
YDR125C::chr4_4:up	193.801	178.302	92.1164
YDR126W::chr4_4:dn	23.3974	18.1331	10.2951
YDR126W::chr4_4:up	46.5123	3.18396	0
YDR128W::chr4_4:dn	978.793	746.752	390.279
YDR128W::chr4_4:up	1454.8	1264.03	688.164
YDR130C::chr4_4:dn	175.481	153.307	228.365
YDR130C::chr4_4:up	276.49	324.764	303.442
YDR131C::chr4_4:dn	41.5955	30.4965	41.1805
YDR131C::chr4_4:up	351.426	324.764	249.256
YDR132C::chr4_4:dn	116.987	114.568	124.477
YDR132C::chr4_4:up	441.867	318.396	325.117
YDR133C::chr4_4:dn	467.949	558.004	610.22
YDR133C::chr4_4:up	385.019	340.684	314.28
YDR134C::chr4_4:dn	258.672	215.948	248.955
YDR134C::chr4_4:up	514.22	515.802	417.233
YDR135C::chr4_4:dn	167.682	152.483	130.093
YDR135C::chr4_4:up	245.482	226.061	173.396
YDR136C::chr4_4:dn	1095.78	1255.3	924.689
YDR136C::chr4_4:up	1206.74	1082.55	812.792
YDR137W::chr4_4:dn	1199.77	1164.64	1086.6
YDR137W::chr4_4:up	449.619	382.076	368.466
YDR138W::chr4_4:dn	22.0976	7.41807	2.80776
YDR138W::chr4_4:up	31.0082	6.36793	5.41861
YDR139C::chr4_4:dn	588.836	588.5	428.652
YDR139C::chr4_4:up	250.65	292.925	205.907
YDR140W::chr4_4:dn	62.3932	46.1569	16.8466
YDR140W::chr4_4:up	183.465	159.198	21.6744
YDR142C::chr4_4:dn	204.078	140.943	205.902
YDR142C::chr4_4:up	268.738	366.156	270.931
YDR143C::chr4_4:dn	129.986	171.44	205.902
YDR143C::chr4_4:up	108.529	57.3113	298.024
YDR144C::chr4_4:dn	181.98	151.658	152.555
YDR144C::chr4_4:up	519.388	544.458	606.885
YDR146C::chr4_4:dn	70.1923	75.8291	106.695
YDR146C::chr4_4:up	209.305	222.877	211.326
YDR147W::chr4_5:up	1180.9	1369.1	1110.82
YDR148C::chr4_5:dn	7.79915	4.94538	12.167
YDR148C::chr4_5:up	139.537	245.165	157.14
YDR149C::chr4_5:dn	19.4979	9.89076	31.8213
YDR149C::chr4_5:up	315.25	445.755	319.698
YDR150W::chr4_5:dn	66.2928	28.848	56.1552
YDR150W::chr4_5:up	589.156	789.623	579.792
YDR151C::chr4_5:dn	11.6987	15.6604	17.7825
YDR151C::chr4_5:up	563.316	703.656	395.559
YDR152W::chr4_5:dn	97.4893	62.6415	70.194
YDR152W::chr4_5:up	2025.87	2158.73	1593.07
YDR153C::chr4_5:up	793.293	827.83	688.164
YDR154C::chr4_5:dn	41.5955	8.2423	35.565
YDR154C::chr4_5:up	640.836	764.151	1018.7
YDR155C::chr4_5:up	93.0246	41.3915	43.3489
YDR156W::chr4_5:dn	15.5983	7.41807	7.48736
YDR156W::chr4_5:up	1028.44	1178.07	894.071
YDR157W::chr4_5:dn	32.4964	24.7269	37.4368
YDR157W::chr4_5:up	819.134	1184.43	921.164
YDR158W::chr4_5:dn	31.1966	6.59384	20.5902
YDR159W::chr4_5:up	436.699	461.675	314.28
YDR161W::chr4_5:dn	18.198	4.12115	1.87184
YDR161W::chr4_5:up	152.457	98.7028	10.8372
YDR162C::chr4_5:dn	12.9986	9.89076	20.5902
YDR162C::chr4_5:up	602.076	1092.1	991.606
YDR163W::chr4_5:dn	44.1952	35.4419	28.0776
YDR163W::chr4_5:up	403.107	458.491	541.861
YDR165W::chr4_5:dn	89.6902	46.1569	81.4251
YDR169C::chr4_5:dn	70.1923	56.8719	90.7843
YDR169C::chr4_5:up	534.892	630.425	390.14
YDR171W::chr4_5:dn	55.8939	18.9573	29.0135
YDR171W::chr4_5:up	555.564	716.392	444.326
YDR173C::chr4_5:dn	14.2984	10.715	7.48736
YDR173C::chr4_5:up	41.3443	120.991	43.3489
YDR174W::chr00_14:up	279.074	257.901	75.8606
YDR176W::chr4_5:up	31.0082	3.18396	0
YDR178W::chr4_5:dn	25.9972	12.3634	25.2698
YDR178W::chr4_5:up	390.187	569.929	444.326
YDR179C::chr4_5:dn	55.8939	28.0238	49.6038
YDR179W-A::chr4_5:dn	11.6987	9.06653	14.0388
YDR181C::chr4_5:dn	23.3974	18.1331	19.6543
YDR181C::chr4_5:up	1777.8	2114.15	1425.1
YDR183W::chr4_5:dn	5.19943	7.41807	12.167
YDR183W::chr4_5:up	382.435	538.09	476.838
YDR184C::chr4_5:dn	15.5983	11.5392	14.0388
YDR184C::chr4_5:up	1945.77	1837.15	1083.72
YDR185C::chr4_5:up	1142.14	1426.42	1349.23
YDR186C::chr4_5:up	625.332	719.576	503.931
YDR191W::chr4_5:dn	691.524	819.284	786.173
YDR191W::chr4_5:up	1059.45	1264.03	1262.54
YDR192C::chr4_5:dn	6.49929	4.94538	15.9106
YDR192C::chr4_5:up	966.423	971.109	709.838
YDR193W::chr4_5:dn	27.297	21.43	42.1164
YDR193W::chr4_5:up	1899.25	2292.45	2324.58
YDR195W::chr4_5:up	400.523	210.142	21.6744
YDR197W::chr4_5:dn	22.0976	11.5392	43.0523
YDR197W::chr4_5:up	240.314	327.948	254.675
YDR198C::chr4_5:dn	46.7949	28.848	63.6426
YDR198C::chr4_5:up	1366.95	1273.59	1013.28
YDR199W::chr4_5:dn	7.79915	7.41807	20.5902
YDR200C::chr4_5:dn	18.198	8.2423	17.7825
YDR200C::chr4_5:up	85.2726	47.7594	48.7675
YDR202C::chr00_14:dn	64.9929	42.0357	59.8989
YDR202C::chr00_14:up	726.109	662.264	460.582
YDR203W::chr4_5:up	860.478	993.396	856.141
YDR204W::chr4_5:up	2418.64	3613.8	2021.14
YDR205W::chr00_14:dn	25.9972	16.4846	26.2058
YDR205W::chr00_14:up	5131.86	5581.49	5223.54
YDR206W::chr4_5:up	677.013	1073	823.629
YDR207C::chr4_5:up	186.049	143.278	10.8372
YDR209C::chr4_5:up	1090.46	1451.89	1202.93
YDR210W::chr4_5:up	1343.69	1467.81	1425.1
YDR213W::chr4_5:up	700.269	678.184	466.001
YDR214W::chr4_5:dn	58.4936	42.86	57.0911
YDR214W::chr4_5:up	695.101	662.264	568.954
YDR215C::chr4_5:dn	32.4964	14.0119	33.6931
YDR215C::chr4_5:up	917.326	872.406	791.117
YDR216W::chr4_5:dn	48.0947	28.848	29.0135
YDR216W::chr4_5:up	457.371	636.793	568.954
YDR217C::chr4_5:dn	19.4979	9.06653	17.7825
YDR217C::chr4_5:up	377.267	340.684	406.396
YDR218C::chr4_5:up	770.037	850.118	682.745
YDR219C::chr4_5:dn	3.89957	4.94538	10.2951
YDR219C::chr4_5:up	542.644	875.59	839.885
YDR220C::chr4_5:up	457.371	534.906	298.024
YDR221W::chr4_5:up	987.095	1738.44	1425.1
YDR222W::chr4_5:dn	36.396	14.8361	30.8854
YDR222W::chr4_5:up	772.621	990.212	904.908
YDR223W::chr4_5:up	397.939	299.292	265.512
YDR225W::chr4_5:dn	20.7977	11.5392	20.5902
YDR225W::chr4_5:up	403.107	245.165	276.349
YDR226W::chr4_5:dn	18.198	2.47269	6.55144
YDR229W::chr4_5:dn	270.37	112.095	282.648
YDR229W::chr4_5:up	956.087	499.882	628.559
YDR230W::chr4_5:up	335.922	235.613	303.442
YDR231C::chr4_5:dn	12.9986	15.6604	24.3339
YDR231C::chr4_5:up	62.0164	28.6557	16.2558
YDR233C::chr4_5:dn	122.187	66.7626	102.015
YDR233C::chr4_5:up	1395.37	987.028	1522.63
YDR234W::chr4_5:dn	308.066	184.627	329.444
YDR234W::chr4_5:up	886.318	627.241	921.164
YDR239C::chr4_5:dn	75.3918	32.145	93.592
YDR239C::chr4_5:up	214.473	175.118	173.396
YDR241W::chr4_5:dn	14.2984	5.76961	5.61552
YDR241W::chr4_5:up	248.066	85.967	92.1164
YDR242W::chr00_17a:dn	339.263	290.129	305.11
YDR242W::chr00_17a:up	149.873	92.3349	173.396
YDR244W::chr4_6:up	268.738	114.623	195.07
YDR245W::chr4_6:up	38.7603	12.7359	59.6047
YDR247W::chr4_6:up	38.7603	6.36793	32.5117
YDR248C::chr4_6:up	136.953	79.5991	102.954
YDR249C::chr4_6:up	147.289	82.783	92.1164
YDR251W::chr4_6:dn	29.8967	4.12115	16.8466
YDR251W::chr4_6:up	126.617	79.5991	140.884
YDR252W::chr4_6:up	90.4406	15.9198	37.9303
YDR253C::chr4_6:up	118.865	35.0236	119.209
YDR254W::chr4_6:dn	12.9986	10.715	14.0388
YDR254W::chr4_6:up	521.972	105.071	211.326
YDR256C::chr4_6:up	191.217	79.5991	167.977
YDR257C::chr4_6:up	80.1045	25.4717	48.7675
YDR258C::chr4_6:up	90.4406	44.5755	92.1164
YDR259C::chr4_6:up	346.258	318.396	319.698
YDR260C::chr4_6:dn	24.6973	16.4846	30.8854
YDR261C::chr4_6:up	136.953	60.4953	195.07
YDR262W::chr4_6:dn	29.8967	17.3088	31.8213
YDR262W::chr4_6:up	87.8566	28.6557	92.1164
YDR263C::chr4_6:up	38.7603	3.18396	32.5117
YDR264C::chr4_6:up	38.7603	3.18396	0
YDR265W::chr4_6:dn	7.79915	9.06653	8.42328
YDR265W::chr4_6:up	131.785	35.0236	81.2792
YDR268W::chr4_6:up	222.226	50.9434	43.3489
YDR269C::chr4_6:up	31.0082	9.55189	5.41861
YDR272W::chr4_6:dn	20.7977	10.715	11.231
YDR272W::chr4_6:up	77.5205	38.2076	108.372
YDR273W::chr4_6:up	198.969	76.4151	124.628
YDR274C::chr4_6:up	54.2644	9.55189	37.9303
YDR275W::chr4_6:up	80.1045	22.2877	86.6978
YDR277C::chr4_6:dn	2.59972	8.2423	16.8466
YDR278C::chr4_6:dn	3.89957	4.12115	11.231
YDR279W::chr4_6:up	90.4406	25.4717	108.372
YDR281C::chr4_6:up	1152.47	671.816	910.327
YDR283C::chr4_6:up	131.785	66.8632	151.721
YDR284C::chr4_6:up	51.6804	6.36793	21.6744
YDR286C::chr4_6:up	90.4406	54.1274	184.233
YDR287W::chr4_6:up	232.562	162.382	184.233
YDR289C::chr4_6:dn	18.198	6.59384	0.93592
YDR291W::chr4_6:up	465.123	213.325	460.582
YDR293C::chr4_6:dn	51.9943	21.43	44.9242
YDR293C::chr4_6:up	271.322	63.6793	390.14
YDR294C::chr4_6:dn	29.8967	17.3088	24.3339
YDR294C::chr4_6:up	333.338	175.118	287.186
YDR295C::chr4_6:dn	122.187	88.1926	168.466
YDR295C::chr4_6:up	103.361	22.2877	151.721
YDR296W::chr4_6:dn	139.085	87.3684	113.246
YDR296W::chr4_6:up	447.035	120.991	417.233
YDR297W::chr4_6:dn	9.09901	7.41807	14.0388
YDR297W::chr4_6:up	604.66	334.316	704.42
YDR298C::chr4_6:up	167.961	41.3915	92.1164
YDR300C::chr4_6:dn	87.0905	48.6296	89.8483
YDR300C::chr4_6:up	671.845	343.868	568.954
YDR304C::chr4_6:up	392.771	264.269	292.605
YDR305C::chr4_6:up	227.394	50.9434	92.1164
YDR306C::chr4_6:up	312.666	114.623	195.07
YDR307W::chr4_6:dn	76.6916	43.6842	59.8989
YDR307W::chr4_6:up	100.777	19.1038	32.5117
YDR309C::chr4_6:up	103.361	35.0236	119.209
YDR310C::chr4_6:dn	5.19943	10.715	3.74368
YDR310C::chr4_6:up	772.621	442.571	487.675
YDR312W::chr4_6:dn	87.0905	27.1996	78.6173
YDR312W::chr4_6:up	196.385	28.6557	140.884
YDR313C::chr4_6:dn	1.29986	5.76961	12.167
YDR313C::chr4_6:up	116.281	22.2877	97.535
YDR314C::chr4_6:up	348.842	152.83	319.698
YDR315C::chr4_6:dn	3.89957	8.2423	21.5262
YDR316W::chr4_6:up	28.4242	12.7359	32.5117
YDR317W::chr4_6:dn	14.2984	4.94538	12.167
YDR317W::chr4_6:up	173.129	130.542	281.768
YDR318W::chr4_6:dn	5.19943	4.94538	12.167
YDR318W::chr4_6:up	49.0963	3.18396	32.5117
YDR319C::chr4_6:dn	7.79915	9.89076	10.2951
YDR319C::chr4_6:up	1105.96	458.491	834.466
YDR320C::chr4_6:up	196.385	47.7594	32.5117
YDR321W::chr4_6:up	255.818	178.302	195.07
YDR322W::chr4_6:up	139.537	66.8632	124.628
YDR326C::chr00_17a:dn	15.5983	8.2423	27.1417
YDR326C::chr00_17a:up	242.898	245.165	205.907
YDR329C::chr4_6:up	129.201	31.8396	113.791
YDR330W::chr4_6:dn	53.2942	17.3088	39.3087
YDR330W::chr4_6:up	59.4324	28.6557	92.1164
YDR332W::chr4_6:dn	38.9957	19.7815	43.9883
YDR332W::chr4_6:up	51.6804	15.9198	54.1861
YDR333C::chr4_6:up	74.9365	28.6557	37.9303
YDR334W::chr4_6:dn	11.6987	12.3634	12.167
YDR334W::chr4_6:up	139.537	22.2877	37.9303
YDR335W::chr4_6:dn	15.5983	13.1877	16.8466
YDR335W::chr4_6:up	33.5922	9.55189	21.6744
YDR337W::chr4_6:dn	3.89957	6.59384	12.167
YDR337W::chr4_6:up	72.3525	15.9198	48.7675
YDR338C::chr4_7:up	126.617	79.5991	86.6978
YDR340W::chr4_7:up	266.154	149.646	243.838
YDR344C::chr4_7:up	472.875	213.325	346.791
YDR345C::chr4_7:up	95.6087	50.9434	75.8606
YDR346C::chr4_7:up	87.8566	149.646	146.303
YDR347W::chr4_7:up	1335.94	932.901	1029.54
YDR348C::chr4_7:dn	63.693	23.0784	39.3087
YDR348C::chr4_7:up	136.953	19.1038	65.0233
YDR349C::chr4_7:up	808.798	531.722	845.304
YDR351W::chr4_7:up	62.0164	15.9198	48.7675
YDR352W::chr4_7:up	152.457	57.3113	65.0233
YDR354W::chr4_7:up	56.8484	31.8396	32.5117
YDR357C::chr4_7:dn	5.19943	3.29692	14.9747
YDR357C::chr4_7:up	74.9365	47.7594	54.1861
YDR358W::chr4_7:up	67.1845	19.1038	54.1861
YDR360W::chr4_7:up	235.146	152.83	135.465
YDR363W::chr4_7:up	188.633	25.4717	54.1861
YDR363W-A::chr00_2:dn	2196.76	2621.88	2292.07
YDR363W-A::chr00_2:up	2031.04	1127.12	1907.35
YDR368W::chr4_7:up	82.6886	12.7359	27.0931
YDR369C::chr4_7:up	77.5205	12.7359	37.9303
YDR370C::chr4_7:up	170.545	73.2311	135.465
YDR371W::chr4_7:up	1395.37	518.986	1089.14
YDR372C::chr4_7:up	912.158	448.939	493.094
YDR374C::chr4_7:up	124.033	25.4717	65.0233
YDR378C::chr4_7:up	472.875	235.613	281.768
YDR379W::chr4_7:up	72.3525	38.2076	92.1164
YDR380W::chr4_7:up	369.515	334.316	341.373
YDR383C::chr4_7:up	54.2644	31.8396	102.954
YDR384C::chr4_7:up	423.779	407.547	373.884
YDR385W::chr4_7:up	312.666	95.5189	157.14
YDR386W::chr4_7:up	144.705	152.83	102.954
YDR387C::chr4_7:up	62.0164	50.9434	16.2558
YDR388W::chr4_7:up	31.0082	9.55189	0
YDR389W::chr4_7:up	38.7603	15.9198	0
YDR391C::chr4_7:dn	31.1966	25.5511	31.8213
YDR391C::chr4_7:up	328.17	210.142	368.466
YDR392W::chr4_7:dn	93.5898	59.3445	167.53
YDR393W::chr4_7:up	550.396	254.717	363.047
YDR395W::chr4_7:up	237.73	98.7028	243.838
YDR399W::chr4_7:up	167.961	50.9434	43.3489
YDR400W::chr4_7:up	74.9365	63.6793	270.931
YDR402C::chr4_7:up	121.449	76.4151	162.558
YDR403W::chr4_7:up	312.666	114.623	151.721
YDR405W::chr4_7:dn	7.79915	4.94538	14.9747
YDR405W::chr4_7:up	1051.7	776.887	932.001
YDR406W::chr4_7:up	188.633	63.6793	130.047
YDR408C::chr4_7:up	147.289	28.6557	75.8606
YDR409W::chr4_7:up	191.217	92.3349	227.582
YDR411C::chr4_7:up	281.658	331.132	227.582
YDR414C::chr4_7:up	581.404	171.934	368.466
YDR415C::chr4_7:up	64.6004	28.6557	43.3489
YDR417C::chr00_17a/chr00_18:up	821.718	331.132	216.744
YDR418W::chr4_7:up	1625.35	1235.38	1013.28
YDR419W::chr4_7:up	917.326	1022.05	1105.4
YDR420W::chr4_7:up	118.865	19.1038	43.3489
YDR421W::chr4_7:up	193.801	156.014	314.28
YDR423C::chr4_7:up	263.57	210.142	189.651
YDR424C::chr00_8:up	260.986	44.5755	124.628
YDR425W::chr4_7:up	217.057	54.1274	102.954
YDR426C::chr4_7:up	214.473	111.439	211.326
YDR428C::chr4_7:up	152.457	54.1274	65.0233
YDR430C::chr4_7:up	529.724	528.538	503.931
YDR431W::chr4_7:up	211.889	200.59	379.303
YDR432W::chr4_7:up	139.537	95.5189	81.2792
YDR433W::chr4_7:up	263.57	251.533	178.814
YDR435C::chr4_7:up	41.3443	6.36793	16.2558
YDR436W::chr4_7:up	757.117	458.491	644.815
YDR438W::chr4_8:dn	365.26	230.784	240.532
YDR438W::chr4_8:up	731.277	671.816	617.722
YDR439W::chr4_8:dn	581.036	380.794	172.209
YDR439W::chr4_8:up	449.619	197.406	65.0233
YDR440W::chr4_8:dn	430.253	487.12	408.997
YDR440W::chr4_8:up	279.074	159.198	265.512
YDR441C::chr4_8:dn	200.178	131.053	156.299
YDR441C::chr4_8:up	485.795	331.132	325.117
YDR442W::chr4_8:up	149.873	15.9198	16.2558
YDR443C::chr4_8:dn	798.113	592.621	329.444
YDR443C::chr4_8:up	100.777	25.4717	65.0233
YDR444W::chr00_17a:up	175.713	108.255	65.0233
YDR445C::chr00_14:dn	3.89957	4.94538	14.0388
YDR445C::chr00_14:up	299.746	133.726	308.861
YDR446W::chr4_8:dn	708.423	555.531	583.078
YDR446W::chr4_8:up	204.137	114.623	151.721
YDR447C::chr4_8:dn	785.114	604.985	561.552
YDR447C::chr4_8:up	705.437	251.533	493.094
YDR448W::chr4_8:dn	127.386	92.3137	34.6291
YDR448W::chr4_8:up	113.697	127.359	43.3489
YDR450W::chr4_8:dn	703.223	421.181	255.506
YDR450W::chr4_8:up	160.209	50.9434	65.0233
YDR451C::chr4_8:dn	352.261	249.742	275.161
YDR451C::chr4_8:up	180.881	63.6793	140.884
YDR452W::chr4_8:dn	1449.34	32.145	79.5532
YDR452W::chr4_8:up	338.506	229.245	482.257
YDR455C::chr4_8:dn	23.3974	39.563	20.5902
YDR455C::chr4_8:up	31.0082	12.7359	37.9303
YDR456W::chr4_8:dn	166.382	71.708	81.4251
YDR457W::chr4_8:dn	564.138	329.692	212.454
YDR457W::chr4_8:up	286.826	149.646	81.2792
YDR458C::chr4_8:dn	282.069	183.803	272.353
YDR459C::chr4_8:dn	410.755	352.77	322.893
YDR459C::chr4_8:up	72.3525	98.7028	92.1164
YDR461W::chr00_17a:dn	977.493	1037.71	955.575
YDR461W::chr00_17a:up	976.759	547.642	666.489
YDR462W::chr4_8:dn	3234.05	4004.93	3857.86
YDR463W::chr4_8:dn	1236.16	1152.27	640.169
YDR463W::chr4_8:up	596.908	289.741	265.512
YDR465C::chr4_8:dn	561.539	369.255	450.178
YDR465C::chr4_8:up	175.713	197.406	222.163
YDR466W::chr4_8:dn	636.93	530.804	510.077
YDR466W::chr4_8:up	183.465	101.887	162.558
YDR467C::chr4_8:dn	716.222	685.759	722.53
YDR469W::chr4_8:dn	479.648	404.697	439.883
YDR469W::chr4_8:up	509.051	547.642	379.303
YDR471W::chr4_8:dn	1563.73	974.24	810.507
YDR474C::chr4_8:dn	144.284	153.307	130.093
YDR474C::chr4_8:up	56.8484	47.7594	32.5117
YDR475C::chr4_8:dn	244.373	201.936	143.196
YDR475C::chr4_8:up	46.5123	3.18396	32.5117
YDR476C::chr4_8:dn	340.563	455.799	349.098
YDR476C::chr4_8:up	299.746	439.387	395.559
YDR477W::chr4_8:dn	244.373	129.404	90.7843
YDR477W::chr4_8:up	317.834	245.165	113.791
YDR479C::chr4_8:dn	464.049	411.291	497.91
YDR479C::chr4_8:up	325.586	436.203	346.791
YDR480W::chr4_8:dn	803.312	608.282	642.977
YDR480W::chr4_8:up	545.228	531.722	514.768
YDR481C::chr4_8:dn	174.181	162.373	168.466
YDR481C::chr4_8:up	529.724	356.604	487.675
YDR482C::chr4_8:dn	659.028	406.345	523.179
YDR482C::chr4_8:up	341.09	277.005	276.349
YDR483W::chr4_8:dn	1425.94	1271.79	1358.96
YDR483W::chr4_8:up	1227.41	1162.15	1132.49
YDR484W::chr4_8:dn	63.693	53.5749	82.361
YDR484W::chr4_8:up	100.777	41.3915	124.628
YDR485C::chr4_8:dn	1141.28	562.949	362.201
YDR485C::chr4_8:up	170.545	38.2076	48.7675
YDR486C::chr4_8:dn	188.479	233.257	182.504
YDR486C::chr4_8:up	173.129	168.75	157.14
YDR488C::chr4_8:dn	256.072	242.324	283.584
YDR488C::chr4_8:up	237.73	178.302	233
YDR490C::chr4_8:dn	773.415	581.906	477.319
YDR490C::chr4_8:up	245.482	289.741	292.605
YDR491C::chr4_8:dn	553.739	487.12	514.756
YDR491C::chr4_8:up	271.322	127.359	308.861
YDR492W::chr4_8:dn	583.636	531.628	595.245
YDR492W::chr4_8:up	483.211	362.972	433.489
YDR493W::chr00_17a:dn	435.452	452.502	433.331
YDR493W::chr00_17a:up	333.338	324.764	520.187
YDR494W::chr4_8:dn	107.888	111.271	176.889
YDR494W::chr4_8:up	64.6004	82.783	124.628
YDR495C::chr4_8:dn	428.953	330.516	151.619
YDR495C::chr4_8:up	385.019	248.349	102.954
YDR496C::chr4_8:dn	366.56	187.924	156.299
YDR496C::chr4_8:up	108.529	66.8632	59.6047
YDR497C::chr4_8:dn	809.811	713.783	781.493
YDR497C::chr4_8:up	568.484	369.34	579.792
YDR500C::chr00_17a:up	245.482	98.7028	184.233
YDR500C::chr4_8:dn	240.474	292.602	207.774
YDR500C::chr4_8:up	129.201	159.198	151.721
YDR501W::chr4_8:dn	248.273	226.663	141.324
YDR501W::chr4_8:up	521.972	477.594	574.373
YDR502C::chr00_17a:dn	610.933	536.574	645.785
YDR502C::chr00_17a:up	558.148	518.986	466.001
YDR503C::chr4_8:dn	993.091	829.175	774.006
YDR503C::chr4_8:up	356.594	254.717	260.093
YDR504C::chr4_8:dn	250.873	274.469	262.058
YDR504C::chr4_8:up	237.73	82.783	130.047
YDR505C::chr4_8:dn	347.062	468.987	503.525
YDR505C::chr4_8:up	478.043	436.203	574.373
YDR506C::chr00_17a:dn	955.396	947.864	984.588
YDR506C::chr00_17a:up	816.55	560.377	704.42
YDR506C::chr4_8:dn	373.059	354.419	358.457
YDR506C::chr4_8:up	183.465	187.854	200.489
YDR507C::chr4_8:dn	1726.21	2056.45	1781.99
YDR507C::chr4_8:up	1033.61	1365.92	1251.7
YDR508C::chr4_8:dn	989.192	546.464	596.181
YDR508C::chr4_8:up	279.074	238.797	270.931
YDR509W::chr4_8:dn	297.667	238.202	146.939
YDR509W::chr4_8:up	372.099	334.316	167.977
YDR511W::chr4_8:dn	206.677	229.136	308.854
YDR511W::chr4_8:up	134.369	98.7028	75.8606
YDR512C::chr00_17a:up	149.873	57.3113	151.721
YDR512C::chr4_8:dn	350.962	342.055	258.314
YDR512C::chr4_8:up	377.267	404.363	346.791
YDR513W::chr4_8:dn	673.326	803.624	920.946
YDR513W::chr4_8:up	1082.7	780.071	1072.89
YDR514C::chr4_8:dn	757.817	979.185	1006.11
YDR514C::chr4_8:up	268.738	327.948	335.954
YDR515W::chr00_17a:dn	478.348	281.062	342.547
YDR515W::chr00_17a:up	253.234	222.877	195.07
YDR516C::chr4_8:dn	396.457	331.34	319.149
YDR516C::chr4_8:up	475.459	3.18396	314.28
YDR517W::chr4_8:dn	812.411	897.586	941.536
YDR517W::chr4_8:up	129.201	120.991	92.1164
YDR518W::chr4_8:dn	3986.66	5412.72	6455.04
YDR518W::chr4_8:up	3211.93	2776.42	4096.47
YDR519W::chr4_8:dn	690.225	470.635	251.763
YDR519W::chr4_8:up	196.385	89.151	48.7675
YDR520C::chr4_8:dn	685.025	731.916	905.035
YDR520C::chr4_8:up	250.65	420.283	547.28
YDR521W::chr4_8:dn	2924.68	2382.85	3046.42
YDR521W::chr4_8:up	1708.04	2072.76	2535.91
YDR522C::chr4_8:dn	319.765	326.395	313.533
YDR522C::chr4_8:up	315.25	353.42	579.792
YDR523C::chr4_8:dn	525.143	439.314	404.318
YDR523C::chr4_8:up	335.922	197.406	265.512
YDR524C::chr4_8:dn	194.979	204.409	226.493
YDR524C::chr4_8:up	178.297	120.991	151.721
YDR525W::chr4_8:dn	1549.43	1140.73	1077.24
YDR525W::chr4_8:up	1550.41	859.67	1257.12
YDR525W-A::chr00_2:dn	20.7977	8.2423	16.8466
YDR525W-A::chr00_2:up	372.099	375.708	330.535
YDR528W::chr4_8:dn	648.629	570.367	587.758
YDR528W::chr4_8:up	444.451	378.892	400.977
YDR529C::chr4_8:dn	582.336	760.764	439.883
YDR529C::chr4_8:up	865.646	646.344	346.791
YDR530C::chr4_8:dn	400.356	399.751	423.036
YDR530C::chr4_8:up	434.115	369.34	368.466
YDR532C::chr4_8:dn	70.1923	14.8361	13.1029
YDR533C::chr4_8:dn	3865.78	4491.23	4253.76
YDR533C::chr4_8:up	524.556	671.816	417.233
YDR534C::chr4_8:dn	555.039	429.424	518.5
YDR534C::chr4_8:up	299.746	397.995	444.326
YDR535C::chr00_2:up	64.6004	31.8396	32.5117
YDR536W::chr00_2:dn	24.6973	14.8361	34.6291
YDR536W::chr00_2:up	465.123	359.788	563.536
YDR537C::chr00_14:up	302.33	152.83	233
YDR538W::chr00_2:dn	23.3974	17.3088	23.398
YDR538W::chr00_2:up	377.267	394.811	287.186
YDR539W::chr00_2:dn	1082.78	1122.6	1184.88
YDR539W::chr00_2:up	710.605	834.198	866.978
YDR540C::chr00_2:dn	1397.35	1602.3	2444.62
YDR540C::chr00_2:up	245.482	108.255	292.605
YDR541C::chr00_2:dn	718.821	535.749	762.775
YDR541C::chr00_2:up	485.795	302.476	357.628
YEL001C::chr5_2:dn	7614.57	7058.7	6783.55
YEL001C::chr5_2:up	5584.06	6702.24	5012.22
YEL003W::chr5_2:up	400.523	229.245	102.954
YEL004W::chr5_2:dn	535.541	395.63	423.972
YEL004W::chr5_2:up	653.756	636.793	455.163
YEL005C::chr5_2:dn	289.868	310.735	283.584
YEL005C::chr5_2:up	315.25	178.302	265.512
YEL006W::chr5_2:up	152.457	44.5755	97.535
YEL007W::chr5_2:dn	12.9986	10.715	14.0388
YEL008W::chr5_2:dn	373.059	443.436	431.459
YEL008W::chr5_2:up	93.0246	44.5755	59.6047
YEL009C::chr5_2:dn	727.92	1404.49	865.726
YEL009C::chr5_2:up	1062.03	1308.61	1538.89
YEL010W::chr5_2:up	457.371	433.019	428.07
YEL011W::chr00_8:up	160.209	76.4151	119.209
YEL012W::chr00_10:up	80.1045	41.3915	92.1164
YEL014C::chr5_2:dn	553.739	626.415	435.203
YEL014C::chr5_2:up	320.418	324.764	406.396
YEL015W::chr5_2:dn	664.227	473.108	530.667
YEL015W::chr5_2:up	160.209	171.934	167.977
YEL016C::chr5_2:dn	893.002	831.648	841.392
YEL016C::chr5_2:up	953.503	866.038	791.117
YEL017C-A::chr5_2:dn	482.247	475.581	539.09
YEL017C-A::chr5_2:up	335.922	429.835	352.21
YEL017W::chr5_2:dn	279.469	282.711	274.225
YEL017W::chr5_2:up	217.057	213.325	260.093
YEL018W::chr5_2:dn	189.779	168.967	163.786
YEL018W::chr5_2:up	118.865	248.349	184.233
YEL020C::chr5_2:dn	518.643	504.429	376.24
YEL020C::chr5_2:up	188.633	162.382	162.558
YEL023C::chr5_2:dn	28.5969	11.5392	22.4621
YEL023C::chr5_2:up	436.699	461.675	363.047
YEL025C::chr5_2:dn	543.341	654.438	539.09
YEL025C::chr5_2:up	496.131	378.892	346.791
YEL027W::chr5_2:dn	45.495	114.568	62.7067
YEL027W::chr5_2:up	134.369	152.83	81.2792
YEL028W::chr5_2:dn	301.567	251.39	187.184
YEL028W::chr5_2:up	82.6886	22.2877	59.6047
YEL029C::chr5_2:dn	71.4922	48.6296	34.6291
YEL030W::chr5_2:dn	919	1110.24	939.664
YEL030W::chr5_2:up	338.506	194.222	308.861
YEL031W::chr5_2:dn	604.434	580.258	270.481
YEL031W::chr5_2:up	596.908	452.123	276.349
YEL037C::chr5_2:dn	495.246	379.97	436.139
YEL037C::chr5_2:up	826.886	770.519	812.792
YEL038W::chr5_2:up	664.093	592.217	747.769
YEL039C::chr5_2:dn	7.79915	8.2423	12.167
YEL039C::chr5_2:up	1134.38	1904.01	1571.4
YEL040W::chr5_2:up	1622.76	1754.36	1506.37
YEL041W::chr5_2:up	1519.4	1798.94	1544.3
YEL042W::chr5_2:dn	24.6973	24.7269	38.3727
YEL042W::chr5_2:up	4315.31	5336.32	5077.24
YEL043W::chr5_2:dn	266.471	164.846	314.469
YEL043W::chr5_2:up	1232.58	1506.01	1278.79
YEL045C::chr5_2:dn	5.19943	9.06653	13.1029
YEL046C::chr5_2:dn	127.386	113.744	117.926
YEL047C::chr5_2:dn	5429.51	6670.49	6512.13
YEL047C::chr5_2:up	4403.17	4979.72	4454.1
YEL048C::chr5_2:up	3178.34	4645.4	3224.07
YEL049W::chr5_2:dn	517.343	444.26	232.108
YEL049W::chr5_2:up	400.523	426.651	514.768
YEL050C::chr5_2:dn	40.2956	26.3754	25.2698
YEL050C::chr5_2:up	759.701	678.184	238.419
YEL052W::chr5_2:dn	807.212	792.909	859.175
YEL052W::chr5_2:up	403.107	324.764	292.605
YEL053C::chr5_2:dn	497.846	532.452	700.068
YEL053C::chr5_2:up	69.7685	22.2877	81.2792
YEL054C::chr5_2:dn	2279.95	2305.37	2455.85
YEL054C::chr5_2:up	1439.3	1279.95	1446.77
YEL056W::chr5_2:up	454.787	525.354	482.257
YEL057C::chr5_2:dn	9.09901	6.59384	14.9747
YEL057C::chr5_2:up	4501.36	4982.9	4475.77
YEL059W::chr5_2:dn	5970.25	6782.59	5123.23
YEL059W::chr5_2:up	3658.97	4266.51	2920.63
YEL060C::chr5_2:dn	76.6916	33.7934	73.0018
YEL060C::chr5_2:up	165.377	111.439	119.209
YEL061C::chr5_2:dn	291.168	159.901	149.747
YEL061C::chr5_2:up	506.467	608.137	422.652
YEL062W::chr5_2:up	211.889	133.726	238.419
YEL063C::chr5_2:dn	61.0933	85.7199	62.7067
YEL063C::chr5_2:up	157.625	79.5991	70.442
YEL064C::chr5_2:dn	136.485	90.6653	107.631
YEL064C::chr5_2:up	82.6886	73.2311	43.3489
YEL065W::chr5_2:dn	358.761	318.153	327.572
YEL065W::chr5_2:up	111.113	44.5755	75.8606
YEL066W::chr5_2:dn	383.458	343.704	309.79
YEL066W::chr5_2:up	299.746	372.524	346.791
YEL067C::chr5_2:dn	614.833	421.181	485.743
YEL067C::chr5_2:up	366.931	337.5	493.094
YEL068C::chr5_2:dn	128.686	72.5322	116.99
YEL068C::chr5_2:up	521.972	585.849	449.745
YEL071W::chr5_2:dn	410.755	212.651	329.444
YEL071W::chr5_2:up	521.972	487.146	514.768
YEL072W::chr5_2:dn	50.6945	23.9027	36.5009
YEL072W::chr5_2:up	294.578	347.052	287.186
YER001W::chr5_2:dn	1116.58	1073.15	947.151
YER001W::chr5_2:up	547.812	522.17	352.21
YER002W::chr5_2:up	741.613	464.859	428.07
YER004W::chr5_2:up	478.043	429.835	346.791
YER005W::chr5_2:dn	1025.59	1272.61	1050.1
YER005W::chr5_2:up	1191.23	1321.34	769.443
YER007C-A::chr5_2:dn	1019.09	732.74	1020.15
YER007C-A::chr5_2:up	2511.67	3352.71	3213.24
YER007W::chr5_2:up	459.955	490.33	390.14
YER010C::chr5_2:dn	608.333	505.253	485.743
YER010C::chr5_2:up	263.57	200.59	270.931
YER011W::chr5_2:up	188.633	168.75	184.233
YER016W::chr5_3:up	726.109	493.514	341.373
YER017C::chr5_3:up	863.062	503.066	325.117
YER019C-A::chr5_3:dn	1143.87	1070.67	1406.69
YER019C-A::chr5_3:up	193.801	130.542	249.256
YER019W::chr5_3:dn	41.5955	23.9027	29.0135
YER019W::chr5_3:up	511.636	448.939	298.024
YER020W::chr5_3:dn	1258.26	771.479	518.5
YER020W::chr5_3:up	638.252	429.835	303.442
YER024W::chr5_3:dn	475.748	315.68	384.663
YER024W::chr5_3:up	173.129	50.9434	102.954
YER027C::chr00_11:dn	695.424	760.764	765.583
YER027C::chr00_11:up	589.156	751.415	883.234
YER028C::chr5_3:dn	909.901	904.18	646.721
YER028C::chr5_3:up	478.043	512.618	390.14
YER030W::chr5_3:dn	174.181	210.179	219.941
YER030W::chr5_3:up	304.914	385.259	363.047
YER031C::chr00_10:dn	84.4908	100.556	88.9124
YER032W::chr5_3:up	904.406	955.189	753.187
YER033C::chr5_3:dn	107.888	36.2661	100.143
YER033C::chr5_3:up	540.06	213.325	260.093
YER034W::chr5_3:dn	760.417	642.075	774.942
YER034W::chr5_3:up	1113.71	952.005	953.676
YER037W::chr00_11:dn	495.246	552.234	592.438
YER037W::chr00_11:up	658.925	792.807	758.606
YER038W-A::chr5_3:dn	1240.06	1293.22	1337.43
YER038W-A::chr5_3:up	775.205	1018.87	839.885
YER039C::chr5_3:up	54.2644	9.55189	32.5117
YER039C-A::chr00_2:dn	335.363	300.844	350.97
YER039C-A::chr00_2:up	917.326	866.038	791.117
YER040W::chr5_3:up	1338.52	977.477	866.978
YER041W::chr5_3:dn	25.9972	10.715	25.2698
YER041W::chr5_3:up	162.793	117.807	151.721
YER042W::chr5_3:dn	699.324	623.942	598.053
YER042W::chr5_3:up	136.953	50.9434	108.372
YER044C::chr5_3:up	87.8566	44.5755	0
YER044C-A::chr5_3:dn	912.5	1042.65	854.495
YER044C-A::chr5_3:up	651.172	926.533	823.629
YER045C::chr5_3:up	661.509	926.533	769.443
YER046W::chr00_10:dn	88.3903	96.4349	73.0018
YER046W::chr00_10:up	297.162	267.453	298.024
YER046W-A::chr5_3:up	77.5205	44.5755	48.7675
YER047C::chr5_3:dn	388.658	642.899	428.652
YER048C::chr5_3:dn	491.346	458.272	827.354
YER048C::chr5_3:up	979.343	1235.38	2015.72
YER049W::chr5_3:dn	974.893	738.51	857.303
YER049W::chr5_3:up	612.412	916.981	650.233
YER050C::chr5_3:dn	22.0976	24.7269	41.1805
YER050C::chr5_3:up	2335.95	3225.35	2796
YER051W::chr5_3:dn	449.751	448.381	365.945
YER051W::chr5_3:up	183.465	73.2311	151.721
YER052C::chr5_3:dn	180.68	169.791	29.0135
YER053C::chr5_3:up	281.658	219.693	167.977
YER055C::chr5_3:up	253.234	251.533	167.977
YER056C::chr5_3:dn	67.5926	57.6961	50.5397
YER056C::chr5_3:up	72.3525	60.4953	16.2558
YER056C-A::chr5_3:dn	740.919	232.433	533.475
YER056C-A::chr5_3:up	2320.45	2387.97	1576.82
YER057C::chr5_3:up	359.178	391.627	352.21
YER058W::chr5_3:up	312.666	343.868	216.744
YER059W::chr5_3:up	291.994	238.797	135.465
YER060W::chr5_3:up	630.5	859.67	764.024
YER060W-A::chr5_3:up	217.057	162.382	108.372
YER061C::chr5_3:dn	46.7949	33.7934	81.4251
YER061C::chr5_3:up	1408.29	1509.2	1500.96
YER062C::chr5_3:up	382.435	550.826	270.931
YER063W::chr00_10:dn	740.919	821.757	742.185
YER063W::chr00_10:up	488.379	569.929	747.769
YER064C::chr00_8:up	403.107	222.877	357.628
YER065C::chr5_3:dn	10.3989	13.1877	27.1417
YER065C::chr5_3:up	193.801	152.83	254.675
YER066W::chr00_10:up	77.5205	50.9434	97.535
YER067C-A::chr5_3:dn	11.6987	4.12115	12.167
YER067C-A::chr5_3:up	307.498	315.212	173.396
YER067W::chr5_3:up	59.4324	47.7594	54.1861
YER068C-A::chr5_3:up	366.931	277.005	270.931
YER068W::chr5_3:dn	171.581	65.9384	69.2581
YER068W::chr5_3:up	36.1762	9.55189	0
YER069W::chr5_3:dn	11.6987	10.715	3.74368
YER069W::chr5_3:up	263.57	321.58	189.651
YER071C::chr5_3:dn	146.884	95.6107	155.363
YER071C::chr5_3:up	785.541	646.344	720.675
YER072W::chr5_3:up	87.8566	47.7594	102.954
YER073W::chr5_3:dn	478.348	574.488	471.704
YER073W::chr5_3:up	335.922	277.005	319.698
YER074W::chr5_3:dn	1142.58	821.757	469.832
YER074W::chr5_3:up	780.373	499.882	222.163
YER075C::chr5_3:dn	422.454	331.34	318.213
YER075C::chr5_3:up	328.17	216.509	363.047
YER077C::chr00_8:dn	1242.66	1134.14	987.396
YER077C::chr00_8:up	1876	1248.11	1300.47
YER078C::chr00_8:dn	10.3989	4.94538	12.167
YER078C::chr00_8:up	286.826	331.132	270.931
YER079W::chr5_3:dn	254.772	220.069	301.366
YER079W::chr5_3:up	105.945	60.4953	43.3489
YER080W::chr5_3:dn	400.356	248.917	246.147
YER080W::chr5_3:up	405.691	318.396	406.396
YER081W::chr5_3:dn	529.042	377.497	468.896
YER081W::chr5_3:up	343.674	433.019	476.838
YER083C::chr5_3:dn	1971.88	1777.04	4484.93
YER083C::chr5_3:up	764.869	318.396	1522.63
YER084W::chr5_3:dn	404.256	313.207	306.046
YER084W::chr5_3:up	80.1045	15.9198	75.8606
YER085C::chr5_3:dn	421.154	243.972	265.801
YER085C::chr5_3:up	217.057	165.566	119.209
YER086W::chr5_3:dn	76.6916	35.4419	75.8095
YER086W::chr5_3:up	105.945	47.7594	70.442
YER087C-A::chr5_3:dn	14.2984	13.1877	20.5902
YER087C-A::chr5_3:up	160.209	95.5189	205.907
YER087W::chr5_3:dn	2053.78	2011.12	1374.87
YER087W::chr5_3:up	1124.05	735.495	715.257
YER088C::chr00_8:dn	358.761	566.246	569.975
YER088C::chr00_8:up	465.123	343.868	964.513
YER089C::chr00_17a:dn	535.541	487.12	491.358
YER089C::chr00_17a:up	304.914	216.509	335.954
YER090W::chr00_8:dn	470.549	475.581	445.498
YER090W::chr00_8:up	521.972	620.873	574.373
YER091C::chr00_8:up	59.4324	31.8396	27.0931
YER091C-A::chr00_2:dn	941.097	921.489	956.511
YER091C-A::chr00_2:up	571.068	528.538	466.001
YER092W::chr00_8:up	62.0164	19.1038	16.2558
YER093C-A::chr00_8:dn	330.164	412.115	419.292
YER093C-A::chr00_8:up	273.906	245.165	281.768
YER095W::chr00_8:up	434.115	343.868	167.977
YER096W::chr00_8:dn	768.216	983.306	961.19
YER096W::chr00_8:up	276.49	206.958	216.744
YER097W::chr00_8:dn	259.972	191.221	258.314
YER097W::chr00_8:up	121.449	38.2076	43.3489
YER098W::chr00_8:up	521.972	668.632	547.28
YER101C::chr00_5:up	478.043	410.731	623.14
YER103W::chr00_5:up	167.961	108.255	195.07
YER106W::chr00_5:dn	31.1966	12.3634	16.8466
YER106W::chr00_5:up	568.484	477.594	379.303
YER108C::chr00_5:dn	48.0947	29.6723	56.1552
YER108C::chr00_5:up	718.357	684.552	601.466
YER109C::chr00_5:up	219.642	286.557	270.931
YER110C::chr00_5:dn	755.217	876.156	529.731
YER110C::chr00_5:up	821.718	700.472	503.931
YER111C::chr00_5:up	315.25	286.557	265.512
YER113C::chr00_5:up	563.316	678.184	644.815
YER114C::chr00_5:dn	360.061	257.984	249.891
YER114C::chr00_5:up	196.385	73.2311	97.535
YER115C::chr00_5:dn	284.669	232.433	331.316
YER115C::chr00_5:up	436.699	289.741	466.001
YER116C::chr00_5:dn	63.693	42.86	9.3592
YER116C::chr00_5:up	41.3443	6.36793	0
YER117W::chr00_5:dn	270.37	155.779	174.081
YER117W::chr00_5:up	170.545	197.406	216.744
YER118C::chr00_5:dn	2762.2	2169.37	2497.04
YER118C::chr00_5:up	974.175	12.7359	655.652
[truncated: 5,202 more rows]
