# Supplementary material for: Genes Required for Survival in Microgravity Revealed by Genome-Wide Yeast Deletion Collections Cultured during Spaceflight
Source: Biomed Res Int. 2015 Jan 13;2015:976458. doi: 10.1155/2015/976458 (PMC4309212; doi:10.1155/2015/976458)
Supplement: Supplementary file 1 — Supplementary tables 1 and 2 provide the Illumina sequencing counts for each barcode/strain of each sample following mean normalization for the homozygous strains (Supplementary Table S1) and the heterozygous deletion strains (Supplementary Table S2). Supplementary tables 3 and 4 list those strains in the homozygous deletion collection (Supplementary Table S3) and the heterozygous deletion collection (Supplementary Table S4) that were excluded from the analysis for technical reasons. Supplementary tables 5 and 6 contain the results from the analysis of the homozygous deletion collection, comparing ground experiments to flight experiments in YPD media (Supplementary Table S5) and in YPD media + 0.5M NaCl (Supplementary Table S6). Supplementary table S7 contains the concordance in GO enrichments of the experiments presented in this study to a compendium of published data (reference 13). Supplementary tables 8 and 9 contain the results from the analysis of the heterozygous deletion collection, comparing ground experiments to flight experiments in YPD media (Supplementary Table S8) and in YPD media + 0.5M NaCl (Supplementary Table S9). [file 976458.f1.zip › TableS2_counts-het.xlsx]

## Sheet: README
Table S2. Normalized counts of heterozygous deletion strain tags (see Methods).
all sheets
Column	Description
Strain tag	the uptag or downtag of a deletion strain
7 generations	count of the strain tag at 7 generations (not available for the -NaCl comparison)
14 generations	count of the strain tag at 14 generations
21 generations	count of the strain tag at 21 generations

## Sheet: ground
Strain tag	14 generations	21 generations
YAL012W::chr00_12:dn	31.4963	45.4978
YAL016W::chr00_12:dn	912.493	678.477
YAL024C::chr00_17a:dn	15.2982	35.1211
YAL047C::chr00_12:dn	104.388	112.547
YAL054C::chr00_12:dn	255.57	232.278
YAL058C-A::chr00_12:dn	692.919	829.338
YAR002C-A::chr00_16a:dn	14.3983	32.7265
YAR050W::chr00_12:dn	19.7977	29.5337
YBL004W::chr2_1:dn	7.19916	18.3588
YBL007C::chr2_1:dn	93.589	138.09
YBL009W::chr2_1:dn	66.5922	133.301
YBL011W::chr2_1:dn	2.69968	11.1749
YBL012C::chr2_1:dn	17.098	24.7444
YBL015W::chr2_1:dn	11.6986	17.5606
YBL016W::chr2_1:dn	8.99895	14.3677
YBL017C::chr2_1:dn	9.89884	13.5695
YBL018C::chr2_1:dn	17.9979	31.9283
YBL019W::chr2_1:dn	4.49947	16.7624
YBL020W::chr2_1:dn	1.79979	4.78925
YBL023C::chr2_1:dn	7.19916	9.57849
YBL024W::chr2_1:dn	3.59958	14.3677
YBL027W::chr2_1:dn	9.89884	12.7713
YBL028C::chr2_1:dn	22.4974	21.5516
YBL030C::chr2_1:dn	11.6986	13.5695
YBL032W::chr2_1:dn	8.99895	33.5247
YBL035C::chr2_1:dn	84.5901	99.776
YBL036C::chr2_1:dn	23.3973	47.8925
YBL037W::chr2_1:dn	8.99895	16.7624
YBL038W::chr2_1:dn	4.49947	19.157
YBL040C::chr2_1:dn	7.19916	18.3588
YBL041W::chr2_1:dn	6.29926	12.7713
YBL042C::chr2_1:dn	9.89884	15.1659
YBL043W::chr2_1:dn	94.4889	66.2513
YBL044W::chr2_1:dn	4.49947	14.3677
YBL045C::chr2_1:dn	5.39937	13.5695
YBL046W::chr2_1:dn	78.2908	122.924
YBL048W::chr2_1:dn	77.3909	12.7713
YBL050W::chr2_1:dn	17.098	44.6996
YBL051C::chr2_1:dn	32.3962	39.9104
YBL052C::chr2_1:dn	10.7987	19.9552
YBL053W::chr2_1:dn	6.29926	8.78029
YBL056W::chr2_1:dn	22.4974	35.9194
YBL057C::chr2_1:dn	14.3983	27.1391
YBL058W::chr2_1:dn	12.5985	17.5606
YBL059W::chr2_1:dn	29.6965	76.628
YBL060W::chr2_1:dn	17.098	16.7624
YBL062W::chr2_1:dn	3.59958	11.1749
YBL063W::chr2_1:dn	80.0906	150.861
YBL064C::chr2_1:dn	11.6986	15.9642
YBL066C::chr2_1:dn	4.49947	11.1749
YBL068W::chr2_1:dn	7.19916	17.5606
YBL070C::chr2_1:dn	2.69968	8.78029
YBL071C::chr2_1:dn	4.49947	18.3588
YBL072C::chr2_1:dn	60.2929	78.2244
YBL073W::chr2_1:dn	60.2929	85.4082
YBL074C::chr2_1:dn	11.6986	26.3409
YBL077W::chr2_1:dn	17.098	23.9462
YBL078C::chr2_1:dn	44.0948	51.8835
YBL079W::chr2_1:dn	7.19916	16.7624
YBL081W::chr2_1:dn	7.19916	9.57849
YBL082C::chr2_1:dn	8.09905	11.1749
YBL084C::chr2_1:dn	37.7956	32.7265
YBL085W::chr2_1:dn	11.6986	18.3588
YBL086C::chr2_1:dn	62.0927	94.9867
YBL087C::chr2_1:dn	8.09905	13.5695
YBL088C::chr2_1:dn	17.098	27.9373
YBL089W::chr2_1:dn	15.2982	31.1301
YBL091C-A::chr00_1:dn	5.39937	11.9731
YBL092W::chr2_1:dn	32.3962	39.9104
YBL093C::chr2_1:dn	9.89884	17.5606
YBL094C::chr2_1:dn	188.078	303.319
YBL095W::chr2_2:dn	14.3983	37.5158
YBL097W::chr2_2:dn	0.899895	11.9731
YBL098W::chr2_2:dn	144.883	174.009
YBL099W::chr2_2:dn	4.49947	21.5516
YBL100C::chr2_2:dn	8.99895	30.3319
YBL101C::chr2_2:dn	32.3962	43.1032
YBL102W::chr2_2:dn	13.4984	28.7355
YBL103C::chr2_2:dn	4.49947	12.7713
YBL105C::chr2_2:dn	94.4889	125.319
YBL106C::chr2_2:dn	36.8957	47.8925
YBL107C::chr2_2:dn	60.2929	78.2244
YBR001C::chr2_2:dn	53.0938	100.574
YBR003W::chr2_2:dn	8.99895	9.57849
YBR004C::chr2_2:dn	41.3952	60.6638
YBR005W::chr2_2:dn	46.7945	44.6996
YBR006W::chr2_2:dn	3.59958	15.1659
YBR007C::chr2_2:dn	10.7987	15.9642
YBR008C::chr2_2:dn	1.79979	10.3767
YBR009C::chr2_2:dn	19.7977	29.5337
YBR011C::chr2_2:dn	69.2919	94.1885
YBR012C::chr2_2:dn	34.196	44.6996
YBR013C::chr2_2:dn	57.5933	67.8477
YBR014C::chr2_2:dn	8.99895	7.98208
YBR015C::chr2_2:dn	21.5975	35.9194
YBR016W::chr2_2:dn	7.19916	15.9642
YBR017C::chr2_2:dn	5.39937	18.3588
YBR019C::chr2_2:dn	120.586	146.87
YBR020W::chr00_18:dn	9.89884	17.5606
YBR020W::chr2_2:dn	54.8936	79.8208
YBR021W::chr2_2:dn	1.79979	10.3767
YBR022W::chr2_2:dn	60.2929	87.8029
YBR024W::chr2_2:dn	42.295	75.0315
YBR025C::chr2_2:dn	3.59958	9.57849
YBR026C::chr2_2:dn	8.99895	35.1211
YBR027C::chr2_2:dn	35.0959	40.7086
YBR028C::chr2_2:dn	64.7924	86.2064
YBR029C::chr2_2:dn	9.89884	19.157
YBR031W::chr2_2:dn	5.39937	15.1659
YBR033W::chr2_2:dn	14.3983	10.3767
YBR035C::chr2_2:dn	22.4974	23.148
YBR036C::chr2_2:dn	1049.28	1112.7
YBR037C::chr2_2:dn	24.2972	26.3409
YBR038W::chr2_2:dn	6.29926	18.3588
YBR039W::chr2_2:dn	37.7956	35.9194
YBR044C::chr2_2:dn	32.3962	43.1032
YBR045C::chr2_2:dn	8.99895	18.3588
YBR046C::chr2_2:dn	15.2982	24.7444
YBR047W::chr2_2:dn	5.39937	20.7534
YBR048W::chr2_2:dn	14.3983	29.5337
YBR050C::chr2_2:dn	3.59958	10.3767
YBR051W::chr2_2:dn	8.09905	15.9642
YBR053C::chr2_2:dn	4.49947	8.78029
YBR054W::chr2_2:dn	22.4974	19.157
YBR055C::chr2_2:dn	9.89884	20.7534
YBR056W::chr2_2:dn	17.9979	18.3588
YBR059C::chr2_2:dn	6.29926	10.3767
YBR060C::chr2_2:dn	5.39937	13.5695
YBR062C::chr2_2:dn	4.49947	9.57849
YBR063C::chr2_2:dn	10.7987	21.5516
YBR064W::chr2_2:dn	36.8957	56.6728
YBR065C::chr2_2:dn	5.39937	16.7624
YBR067C::chr2_2:dn	78.2908	142.879
YBR069C::chr2_2:dn	13.4984	33.5247
YBR070C::chr2_2:dn	6.29926	17.5606
YBR071W::chr2_2:dn	9.89884	12.7713
YBR072W::chr2_2:dn	46.7945	48.6907
YBR073W::chr2_2:dn	26.9968	42.305
YBR074W::chr2_2:dn	11.6986	20.7534
YBR075W::chr00_18:dn	1009.68	996.163
YBR075W::chr2_2:dn	41.3952	49.4889
YBR077C::chr2_2:dn	30.5964	4.78925
YBR078W::chr2_2:dn	7.19916	19.157
YBR079C::chr2_2:dn	18.8978	37.5158
YBR080C::chr00_16a:dn	12.5985	15.1659
YBR081C::chr2_3:dn	14.3983	35.1211
YBR083W::chr00_16a:dn	80.9905	87.0047
YBR084C-A::chr00_16a:dn	0.899895	9.57849
YBR086C::chr2_3:dn	7.19916	10.3767
YBR088C::chr00_16a:dn	1092.47	955.455
YBR089W::chr2_3:dn	30.5964	31.9283
YBR090C-A::chr2_3:dn	7.19916	48.6907
YBR090C::chr00_16a:dn	13.4984	29.5337
YBR092C::chr2_3:dn	2.69968	17.5606
YBR093C::chr2_3:dn	7.19916	22.3498
YBR094W::chr2_3:dn	8.09905	14.3677
YBR095C::chr2_3:dn	4.49947	19.157
YBR099C::chr2_3:dn	8.99895	22.3498
YBR100W::chr2_3/chr00_16a:dn	11.6986	27.1391
YBR102C::chr2_3:dn	33.2961	47.0943
YBR104W::chr2_3:dn	61.1928	95.7849
YBR106W::chr2_3:dn	19.7977	28.7355
YBR108W::chr2_3:dn	3.59958	9.57849
YBR110W::chr2_3:dn	44.9947	85.4082
YBR111C::chr2_3:dn	11.6986	29.5337
YBR112C::chr00_16a:dn	21.5975	40.7086
YBR113W::chr2_3:dn	14.3983	46.2961
YBR114W::chr2_3:dn	8.09905	14.3677
YBR116C::chr2_3:dn	16.1981	18.3588
YBR117C::chr2_3:dn	11.6986	21.5516
YBR119W::chr2_3:dn	1.79979	2.39462
YBR121C::chr00_16a:dn	1919.48	1307.46
YBR123C::chr2_3:dn	26.9968	32.7265
YBR124W::chr2_3:dn	10.7987	44.6996
YBR125C::chr00_16a:dn	7.19916	24.7444
YBR126C::chr2_3:dn	30.5964	27.1391
YBR127C::chr2_3:dn	31.4963	51.0853
YBR128C::chr2_3:dn	26.0969	43.1032
YBR130C::chr2_3:dn	8.09905	15.9642
YBR131W::chr00_16a:dn	35.0959	36.7176
YBR132C::chr2_3:dn	7.19916	20.7534
YBR134W::chr2_3:dn	3.59958	20.7534
YBR135W::chr2_3:dn	8.09905	11.9731
YBR136W::chr2_3:dn	3.59958	10.3767
YBR137W::chr2_3:dn	15.2982	24.7444
YBR138C::chr2_3:dn	3.59958	16.7624
YBR139W::chr2_3:dn	41.3952	55.8746
YBR140C::chr2_3:dn	9.89884	19.157
YBR141C::chr2_3:dn	15.2982	24.7444
YBR142W::chr2_3:dn	45.8946	102.171
YBR143C::chr2_3:dn	2.69968	19.9552
YBR144C::chr2_3:dn	5.39937	25.5427
YBR145W::chr2_3:dn	71.0917	90.9957
YBR146W::chr2_3:dn	29.6965	47.8925
YBR147W::chr2_3:dn	17.098	27.9373
YBR149W::chr2_3:dn	5.39937	13.5695
YBR150C::chr00_16a:dn	14.3983	48.6907
YBR151W::chr2_3:dn	15.2982	23.148
YBR153W::chr2_3:dn	17.9979	17.5606
YBR157C::chr2_3:dn	79.1907	222.7
YBR158W::chr2_3:dn	213.275	345.624
YBR159W::chr2_3:dn	3.59958	8.78029
YBR160W::chr2_3:dn	2.69968	8.78029
YBR162C::chr2_3:dn	14.3983	19.9552
YBR162W-A::chr2_3:dn	9.89884	17.5606
YBR164C::chr2_3:dn	76.491	104.565
YBR166C::chr2_3:dn	6.29926	13.5695
YBR168W::chr00_16a:dn	114.287	127.713
YBR169C::chr00_16a:dn	12.5985	11.9731
YBR170C::chr2_3:dn	3.59958	13.5695
YBR171W::chr2_3:dn	7.19916	23.9462
YBR173C::chr2_4:dn	30.5964	32.7265
YBR174C::chr2_4:dn	29.6965	31.9283
YBR179C::chr2_4:dn	11.6986	18.3588
YBR180W::chr2_4:dn	28.7966	63.8566
YBR183W::chr2_4:dn	13.4984	33.5247
YBR184W::chr2_4:dn	11.6986	32.7265
YBR185C::chr2_4:dn	13.4984	16.7624
YBR186W::chr2_4:dn	8.09905	14.3677
YBR187W::chr2_4:dn	47.6944	104.565
YBR188C::chr2_4:dn	4.49947	23.9462
YBR189W::chr2_4:dn	9.89884	22.3498
YBR190W::chr2_4:dn	1.79979	15.1659
YBR191W::chr00_11:dn	854	306.512
YBR193C::chr2_4:dn	1.79979	15.9642
YBR194W::chr2_4:dn	16.1981	38.314
YBR195C::chr2_4:dn	15.2982	23.9462
YBR196C::chr2_4:dn	12.5985	23.9462
YBR197C::chr2_4:dn	13.4984	27.9373
YBR198C::chr2_4:dn	9.89884	8.78029
YBR199W::chr2_4:dn	60.2929	80.619
YBR201W::chr2_4:dn	17.9979	26.3409
YBR202W::chr2_4:dn	683.92	629.786
YBR203W::chr2_4:dn	797.307	777.454
YBR204C::chr2_4:dn	407.652	481.319
YBR205W::chr2_4:dn	739.713	662.513
YBR206W::chr2_4:dn	844.101	909.957
YBR207W::chr2_4:dn	831.503	1142.24
YBR208C::chr2_4:dn	241.172	376.754
YBR209W::chr2_4:dn	1445.23	940.289
YBR210W::chr2_4:dn	735.214	919.535
YBR211C::chr2_4:dn	820.704	646.548
YBR212W::chr2_4:dn	664.122	1000.95
YBR213W::chr2_4:dn	675.821	776.656
YBR214W::chr2_4:dn	49.4942	88.6011
YBR215W::chr2_4:dn	688.419	740.737
YBR216C::chr2_4:dn	39.5954	46.2961
YBR217W::chr2_4:dn	984.485	630.584
YBR218C::chr2_4:dn	807.205	917.939
YBR219C::chr2_4:dn	1300.35	1352.16
YBR220C::chr2_4:dn	1567.62	1787.99
YBR221C::chr2_4:dn	1054.68	1407.24
YBR222C::chr2_4:dn	1103.27	1033.68
YBR223C::chr2_4:dn	1245.45	758.297
YBR224W::chr2_4:dn	676.721	617.015
YBR225W::chr2_4:dn	990.784	863.661
YBR226C::chr2_4:dn	721.715	372.763
YBR227C::chr2_4:dn	683.02	637.768
YBR228W::chr2_4:dn	880.097	794.217
YBR229C::chr2_4:dn	679.42	836.522
YBR230C::chr2_4:dn	1119.47	11.1749
YBR231C::chr2_4:dn	1355.24	1051.24
YBR232C::chr00_8:dn	431.949	586.683
YBR233W::chr2_4:dn	1269.75	1042.46
YBR234C::chr2_4:dn	803.606	1049.64
YBR235W::chr2_4:dn	933.191	761.49
YBR236C::chr2_4:dn	1015.98	1202.9
YBR237W::chr2_4:dn	1408.34	1229.24
YBR238C::chr2_4:dn	914.293	897.984
YBR239C::chr2_4:dn	795.507	974.612
YBR240C::chr2_4:dn	1045.68	1180.55
YBR241C::chr2_4:dn	1039.38	1011.33
YBR242W::chr2_4:dn	963.787	1067.2
YBR243C::chr2_4:dn	994.384	1215.67
YBR244W::chr2_4:dn	1500.12	1550.12
YBR245C::chr2_4:dn	1167.16	909.957
YBR246W::chr2_4:dn	627.227	688.055
YBR247C::chr2_4:dn	570.533	672.889
YBR248C::chr2_4:dn	897.195	886.011
YBR249C::chr2_4:dn	917.892	903.571
YBR250W::chr2_4:dn	648.824	724.773
YBR251W::chr2_4:dn	937.69	1014.52
YBR252W::chr2_4:dn	791.907	1013.72
YBR253W::chr2_4:dn	776.609	992.971
YBR254C::chr2_4:dn	910.693	1305.07
YBR255W::chr2_4:dn	806.306	1018.51
YBR256C::chr2_4:dn	1382.24	1347.37
YBR257W::chr2_4:dn	830.603	943.482
YBR258C::chr2_4:dn	8.99895	12.7713
YBR259W::chr2_4:dn	1510.92	1046.45
YBR260C::chr2_4:dn	1534.32	1566.08
YBR261C::chr2_4:dn	349.159	10.3767
YBR262C::chr2_4:dn	9.89884	7.18387
YBR263W::chr2_4:dn	1206.76	1225.25
YBR264C::chr2_4:dn	1317.45	1078.38
YBR265W::chr2_4:dn	787.408	284.96
YBR266C::chr2_4:dn	998.883	1087.16
YBR267W::chr2_4:dn	214.175	284.96
YBR268W::chr2_4:dn	1204.96	1715.35
YBR269C::chr00_1:dn	13.4984	32.7265
YBR270C::chr00_16a:dn	1023.18	1253.98
YBR271W::chr00_1:dn	9.89884	4.78925
YBR272C::chr00_16a:dn	1051.98	555.553
YBR275C::chr00_16a:dn	16.1981	14.3677
YBR276C::chr00_16a:dn	613.728	1209.28
YBR277C::chr00_1:dn	1292.25	1008.14
YBR278W::chr00_1:dn	134.984	158.045
YBR279W::chr00_1:dn	27.8967	20.7534
YBR281C::chr00_1:dn	40.4953	53.4799
YBR282W::chr00_1:dn	43.1949	64.6548
YBR283C::chr00_1:dn	24.2972	27.1391
YBR284W::chr00_1:dn	665.922	882.818
YBR286W::chr00_1:dn	17.098	8.78029
YBR287W::chr00_16a:dn	864.799	1153.41
YBR288C::chr00_16a:dn	737.914	753.508
YBR289W::chr00_16a:dn	20.6976	27.9373
YBR291C::chr00_1:dn	4.49947	15.9642
YBR293W::chr00_1:dn	108.887	134.897
YBR294W::chr00_16a:dn	1070.87	1133.46
YBR295W::chr00_1:dn	9.89884	16.7624
YBR297W::chr00_1:dn	1150.97	1633.13
YBR298C::chr00_1:dn	517.439	862.064
YBR300C::chr00_1:dn	6.29926	7.18387
YBR301W::chr00_16a:dn	1397.54	872.441
YCL001W-A::chr00_1:dn	1438.93	1538.15
YCL001W::chr3_1:dn	1673.8	1789.58
YCL002C::chr3_1:dn	1278.75	1384.09
YCL003W::chr3_1:dn	1096.07	1099.13
YCL004W::chr3_1:dn	1446.13	1309.86
YCL005W::chr3_1:dn	1177.96	626.593
YCL006C::chr3_1/chr00_12:dn	1181.56	1148.62
YCL007C::chr3_1:dn	802.706	972.217
YCL008C::chr3_1:dn	840.502	803.795
YCL009C::chr3_1:dn	6.29926	12.7713
YCL010C::chr3_1:dn	1277.85	855.679
YCL011C::chr3_1:dn	14.3983	23.9462
YCL012W::chr3_1:dn	1386.74	1677.83
YCL013W::chr3_1:dn	2253.34	2046.6
YCL014W::chr3_1:dn	794.607	762.289
YCL016C::chr3_1:dn	1059.18	1380.1
YCL017C::chr3_1:dn	966.487	595.463
YCL022C::chr00_12:dn	80.9905	168.422
YCL023C::chr3_1/chr00_12:dn	1462.33	1689.81
YCL024W::chr3_1:dn	934.99	887.607
YCL025C::chr3_1:dn	14.3983	12.7713
YCL026C-A::chr00_16a:dn	1033.98	1488.66
YCL026C::chr3_1:dn	1210.36	976.208
YCL027W::chr3_1:dn	1025.88	1070.4
YCL028W::chr3_1:dn	781.108	1015.32
YCL029C::chr3_1:dn	759.511	838.916
YCL030C::chr3_1:dn	867.498	912.352
YCL031C::chr3_1:dn	3.59958	11.9731
YCL032W::chr3_1:dn	913.393	703.221
YCL033C::chr3_1:dn	825.203	972.217
YCL034W::chr3_1:dn	683.02	624.997
YCL035C::chr00_11:dn	4.49947	7.98208
YCL036W::chr3_1:dn	394.154	549.167
YCL037C::chr3_1:dn	359.058	104.565
YCL038C::chr00_12:dn	16.1981	51.0853
YCL039W::chr3_1:dn	1537.02	934.701
YCL040W::chr3_1:dn	350.959	271.391
YCL041C::chr00_11:dn	20.6976	27.9373
YCL041C::chr3_1:dn	699.218	834.925
YCL042W::chr3_1:dn	836.002	1004.15
YCL043C::chr3_1:dn	1173.46	829.338
YCL044C::chr3_1:dn	930.491	854.881
YCL045C::chr3_1:dn	703.718	1561.29
YCL046W::chr3_1:dn	44.9947	51.0853
YCL047C::chr3_1:dn	698.318	904.37
YCL048W::chr3_1:dn	806.306	731.158
YCL049C::chr3_1:dn	1121.27	1188.53
YCL050C::chr3_1:dn	1370.54	1126.27
YCL051W::chr3_1:dn	881.897	860.468
YCL053C::chr3_1:dn	653.323	581.894
YCL054W::chr3_1:dn	1116.77	809.383
YCL055W::chr3_1:dn	1052.88	868.45
YCL056C::chr3_1:dn	1140.17	1160.59
YCL057W::chr3_1:dn	1101.47	1510.21
YCL058C::chr00_12:dn	884.596	929.114
YCL059C::chr3_1:dn	1402.04	1432.78
YCL060C::chr3_1:dn	2067.96	2111.26
YCL061C::chr3_1:dn	1604.51	1206.09
YCL062W::chr3_1:dn	2140.85	2274.09
YCL063W::chr3_1:dn	966.487	893.993
YCL064C::chr3_1:dn	732.514	1133.46
YCL069W::chr3_1:dn	1318.35	991.374
YCL075W::chr00_12:dn	1321.95	827.742
YCL076W::chr00_12:dn	1266.15	1185.34
YCR001W::chr3_1:dn	14.3983	21.5516
YCR002C::chr3_1:dn	708.217	860.468
YCR003W::chr3_1:dn	16.1981	16.7624
YCR004C::chr3_1:dn	1247.25	1250.79
YCR005C::chr3_1:dn	818.904	763.885
YCR006C::chr3_1:dn	773.909	594.665
YCR007C::chr3_1:dn	920.592	787.033
YCR008W::chr3_1:dn	790.107	716.791
YCR009C::chr3_1:dn	633.526	842.109
YCR010C::chr3_1:dn	1133.87	1544.53
YCR011C::chr3_1:dn	1195.06	1270.75
YCR012W::chr00_11:dn	203.376	284.96
YCR012W::chr3_1:dn	1129.37	1199.71
YCR013C::chr00_11:dn	6.29926	30.3319
YCR013C::chr3_1:dn	3.59958	11.9731
YCR014C::chr3_1:dn	1224.76	1420.01
YCR015C::chr3_1:dn	1091.57	1166.98
YCR016W::chr3_1:dn	1412.83	1657.88
YCR017C::chr3_1:dn	1524.42	1138.24
YCR019W::chr3_1:dn	351.859	733.553
YCR020C-A::chr3_1:dn	1206.76	1196.51
YCR020C::chr3_1:dn	1523.52	1564.49
YCR020W-B::chr00_1:dn	818.004	911.553
YCR021C::chr3_1:dn	1329.14	1165.38
YCR022C::chr3_1:dn	1400.24	1210.88
YCR023C::chr3_1:dn	1086.17	1512.6
YCR024C-A::chr00_1:dn	9.89884	6.38566
YCR024C::chr00_1:dn	13.4984	13.5695
YCR025C::chr00_1:dn	26.0969	46.2961
YCR026C::chr00_1:dn	1036.68	713.598
YCR028C-A::chr00_16a:dn	697.418	792.62
YCR028C::chr00_1:dn	1075.37	569.122
YCR030C::chr00_16a:dn	87.2898	149.265
YCR031C::chr00_1:dn	1294.05	772.665
YCR032W::chr00_16a:dn	1024.98	669.696
YCR033W::chr00_16a:dn	19.7977	21.5516
YCR034W::chr00_1:dn	1134.77	1111.9
YCR035C::chr00_1:dn	6.29926	14.3677
YCR036W::chr00_1:dn	51.294	61.462
YCR037C::chr00_1:dn	6.29926	9.57849
YCR044C::chr00_1:dn	569.633	408.682
YCR045C::chr00_1:dn	5.39937	14.3677
YCR046C::chr00_16a:dn	47.6944	77.4262
YCR047C::chr00_16a:dn	6.29926	15.1659
YCR048W::chr00_16a:dn	1036.68	965.832
YCR049C::chr00_1:dn	1113.17	1392.07
YCR050C::chr00_1:dn	718.116	780.647
YCR051W::chr00_1:dn	2208.34	2204.65
YCR052W::chr00_1:dn	320.362	380.745
YCR053W::chr00_16a:dn	25.197	36.7176
YCR054C::chr00_16a:dn	14.3983	22.3498
YCR057C::chr00_16a:dn	5.39937	4.78925
YCR059C::chr00_1:dn	77.3909	93.3903
YCR060W::chr00_16a:dn	1672	1681.03
YCR062W::chr00_16a:dn	933.191	664.907
YCR063W::chr00_1:dn	12.5985	42.305
YCR064C::chr00_16a:dn	57.5933	45.4978
YCR066W::chr00_1:dn	18.8978	19.9552
YCR067C::chr00_16a:dn	5.39937	8.78029
YCR068W::chr00_1:dn	6.29926	13.5695
YCR069W::chr00_16a:dn	3.59958	10.3767
YCR071C::chr00_1:dn	7.19916	11.9731
YCR072C::chr00_16a:dn	1097.87	569.122
YCR073C::chr00_16a:dn	193.477	246.646
YCR073W-A::chr00_1:dn	54.8936	70.2423
YCR075C::chr00_16a:dn	3.59958	16.7624
YCR076C::chr00_1:dn	89.0896	88.6011
YCR077C::chr00_1:dn	208.776	158.843
YCR079W::chr00_1:dn	503.041	753.508
YCR081W::chr00_1:dn	780.209	854.881
YCR083W::chr00_16a:dn	674.021	700.028
YCR084C::chr00_16a:dn	1037.58	761.49
YCR085W::chr00_1:dn	58.4931	71.0405
YCR086W::chr00_1:dn	264.569	380.745
YCR087C-A::chr00_1:dn	674.921	814.172
YCR088W::chr00_16a:dn	403.153	555.553
YCR089W::chr00_16a:dn	813.505	314.494
YCR092C::chr00_2:dn	304.164	638.566
YCR093W::chr00_2:dn	8.09905	19.9552
YCR094W::chr00_2:dn	472.445	527.615
YCR098C::chr00_2:dn	41.3952	43.1032
YCR100C::chr00_2:dn	797.307	515.642
YCR102C::chr00_2:dn	5.39937	13.5695
YCR102W-A::chr00_14:dn	1251.75	1661.07
YCR105W::chr00_2:dn	20.6976	45.4978
YCR106W::chr00_2:dn	8.99895	16.7624
YCR107W::chr00_17a:dn	2471.11	2500.79
YDL002C::chr4_1:dn	1196.86	1201.3
YDL003W::chr4_1:dn	1432.63	886.011
YDL004W::chr4_1:dn	1426.33	1370.52
YDL005C::chr4_1:dn	1497.42	1613.98
YDL006W::chr4_1:dn	1593.71	1748.08
YDL007W::chr4_1:dn	1589.21	1417.62
YDL008W::chr4_1:dn	1462.33	1284.32
YDL009C::chr4_1:dn	602.929	719.185
YDL010W::chr4_1:dn	1227.46	1049.64
YDL011C::chr4_1:dn	1475.83	1611.58
YDL012C::chr4_1:dn	1743.1	1550.12
YDL013W::chr4_1:dn	1193.26	823.751
YDL014W::chr4_1:dn	986.284	577.104
YDL015C::chr4_1:dn	651.524	1050.44
YDL016C::chr4_1:dn	915.193	719.185
YDL017W::chr4_1:dn	1255.35	924.325
YDL018C::chr4_1:dn	921.492	1091.15
YDL019C::chr4_1:dn	1122.17	892.396
YDL020C::chr4_1:dn	767.61	713.598
YDL021W::chr4_1:dn	1157.26	1114.3
YDL022W::chr4_1:dn	875.597	724.773
YDL023C::chr4_1:dn	1621.61	1739.29
YDL024C::chr4_1:dn	15.2982	16.7624
YDL025C::chr4_1:dn	7.19916	18.3588
YDL026W::chr4_1:dn	889.996	1149.42
YDL027C::chr4_1:dn	749.612	707.212
YDL028C::chr4_1:dn	880.997	770.271
YDL029W::chr4_1:dn	1080.77	1049.64
YDL030W::chr4_1:dn	774.809	1135.05
YDL031W::chr00_17a:dn	1965.37	2152.77
YDL032W::chr4_1:dn	45.8946	32.7265
YDL033C::chr4_1:dn	907.094	1040.06
YDL034W::chr4_1:dn	447.248	880.423
YDL035C::chr4_1:dn	1321.95	924.325
YDL036C::chr4_1:dn	1701.7	1594.02
YDL037C::chr4_1:dn	1449.73	1717.74
YDL038C::chr4_1:dn	907.994	723.975
YDL039C::chr4_1:dn	684.82	653.732
YDL040C::chr4_1:dn	97.1886	138.888
YDL041W::chr4_1:dn	658.723	580.297
YDL043C::chr4_1:dn	1000.68	756.701
YDL045W-A::chr4_1:dn	1130.27	1374.51
YDL046W::chr4_1:dn	1063.68	859.67
YDL047W::chr4_1:dn	1393.04	1166.18
YDL048C::chr4_1:dn	1720.6	1855.83
YDL050C::chr4_1:dn	1079.87	788.629
YDL051W::chr4_1:dn	924.192	715.194
YDL052C::chr4_1:dn	768.51	846.1
YDL053C::chr4_1:dn	851.3	743.93
YDL054C::chr4_1:dn	66.5922	40.7086
YDL055C::chr4_1:dn	593.031	635.373
YDL056W::chr4_1:dn	563.334	1256.38
YDL057W::chr4_1:dn	12.5985	7.98208
YDL058W::chr00_17a:dn	2156.15	2216.62
YDL059C::chr4_1:dn	1815.99	1471.9
YDL060W::chr4_1:dn	1213.96	1154.21
YDL061C::chr4_1:dn	878.297	368.772
YDL062W::chr4_1:dn	1043.88	1136.65
YDL063C::chr4_1:dn	1092.47	954.657
YDL064W::chr4_1:dn	1361.54	1250.79
YDL065C::chr4_1:dn	793.707	660.118
YDL066W::chr4_1:dn	862.999	1034.48
YDL067C::chr4_1:dn	1590.11	1388.08
YDL068W::chr4_1:dn	844.101	1344.18
YDL069C::chr4_1:dn	90.8894	114.942
YDL070W::chr4_1:dn	2220.04	1229.24
YDL071C::chr4_1:dn	1724.2	1476.68
YDL072C::chr4_1:dn	1150.97	1467.11
YDL073W::chr4_1:dn	900.794	1136.65
YDL074C::chr4_1:dn	652.424	854.082
YDL075W::chr4_1:dn	420.251	363.185
YDL076C::chr4_1:dn	1203.16	1066.41
YDL077C::chr4_1:dn	5.39937	11.9731
YDL078C::chr4_1:dn	1057.38	888.405
YDL079C::chr4_1:dn	1093.37	1358.55
YDL080C::chr4_1:dn	806.306	876.432
YDL081C::chr4_1:dn	1197.76	646.548
YDL082W::chr4_1:dn	778.409	585.086
YDL083C::chr4_1:dn	7.19916	308.108
YDL085W::chr4_1:dn	910.693	1005.74
YDL086W::chr4_1:dn	1222.96	1078.38
YDL087C::chr4_1:dn	213.275	304.915
YDL088C::chr4_1:dn	7.19916	13.5695
YDL089W::chr4_1:dn	1101.47	1021.71
YDL090C::chr4_1:dn	801.806	563.535
YDL091C::chr4_1:dn	943.09	1240.42
YDL093W::chr4_1:dn	925.092	1040.06
YDL094C::chr4_1:dn	21.5975	19.157
YDL095W::chr4_1:dn	1873.58	1911.71
YDL096C::chr4_2:dn	1450.63	1562.89
YDL097C::chr4_2:dn	1130.27	849.293
YDL098C::chr4_2:dn	1164.46	1053.63
YDL099W::chr4_2:dn	945.789	919.535
YDL100C::chr4_2:dn	1044.78	1178.15
YDL101C::chr4_2:dn	1137.47	1188.53
YDL102W::chr4_2:dn	922.392	1457.53
YDL103C::chr4_2:dn	784.708	933.105
YDL104C::chr4_2:dn	818.904	660.916
YDL105W::chr4_2:dn	1078.97	946.675
YDL106C::chr4_2:dn	766.71	1299.48
YDL107W::chr4_2:dn	2586.3	2001.11
YDL108W::chr4_2:dn	1249.05	1080.77
YDL109C::chr4_2:dn	512.94	699.23
YDL110C::chr4_2:dn	728.915	537.992
YDL111C::chr4_2:dn	668.622	657.723
YDL112W::chr4_2:dn	936.79	1055.23
YDL113C::chr4_2:dn	1217.56	1245.2
YDL114W::chr4_2:dn	843.201	937.894
YDL115C::chr4_2:dn	1166.26	958.648
YDL116W::chr4_2:dn	860.299	634.575
YDL117W::chr4_2:dn	919.692	795.813
YDL118W::chr4_2:dn	1147.37	1090.35
YDL119C::chr4_2:dn	1873.58	1655.48
YDL120W::chr4_2:dn	1245.45	1611.58
YDL121C::chr4_2:dn	1153.66	749.517
YDL122W::chr4_2:dn	1177.06	1123.08
YDL123W::chr4_2:dn	621.827	909.957
YDL124W::chr4_2:dn	1055.58	984.19
YDL125C::chr4_2:dn	392.354	561.938
YDL126C::chr4_2:dn	1013.28	1003.35
YDL127W::chr4_2:dn	1181.56	1083.17
YDL128W::chr4_2:dn	805.406	1022.5
YDL129W::chr4_2:dn	865.699	813.374
YDL130W-A::chr00_2:dn	350.959	543.58
YDL130W::chr4_2:dn	499.441	321.678
YDL131W::chr4_2:dn	1472.23	957.051
YDL132W::chr4_2:dn	1046.58	1040.86
YDL133C-A::chr00_14:dn	10.7987	36.7176
YDL133W::chr4_2:dn	854	983.392
YDL134C-A::chr4_2:dn	799.106	791.822
YDL134C::chr4_2:dn	1113.17	656.925
YDL135C::chr4_2:dn	898.095	868.45
YDL136W::chr4_2:dn	838.702	630.584
YDL137W::chr4_2:dn	1057.38	1010.53
YDL138W::chr4_2:dn	611.028	934.701
YDL139C::chr4_2:dn	634.426	692.046
YDL140C::chr4_2:dn	593.031	779.849
YDL141W::chr4_2:dn	675.821	466.153
YDL142C::chr4_2:dn	1489.33	953.858
YDL143W::chr4_2:dn	708.217	441.409
YDL144C::chr4_2:dn	569.633	386.333
YDL145C::chr4_2:dn	16.1981	19.9552
YDL146W::chr4_2:dn	893.595	950.666
YDL147W::chr4_2:dn	894.495	997.76
YDL148C::chr4_2:dn	791.907	819.759
YDL149W::chr4_2:dn	990.784	912.352
YDL150W::chr4_2:dn	548.936	689.652
YDL151C::chr4_2:dn	646.124	593.068
YDL152W::chr4_2:dn	867.498	817.365
YDL153C::chr4_2:dn	733.414	704.019
YDL154W::chr4_2:dn	1605.41	1554.91
YDL155W::chr4_2:dn	1219.36	1192.52
YDL156W::chr4_2:dn	992.584	770.271
YDL157C::chr4_2:dn	967.387	847.697
YDL158C::chr4_2:dn	1060.98	723.975
YDL159W::chr4_2:dn	837.802	996.163
YDL160C::chr4_2:dn	878.297	799.804
YDL161W::chr4_2:dn	1231.06	634.575
YDL162C::chr4_2:dn	1065.48	842.109
YDL163W::chr4_2:dn	1166.26	1057.63
YDL164C::chr4_2:dn	881.897	1086.36
YDL165W::chr4_2:dn	464.346	458.171
YDL166C::chr4_2:dn	1510.92	1896.54
YDL167C::chr4_2:dn	1575.72	1099.13
YDL168W::chr4_2:dn	16.1981	47.8925
YDL169C::chr4_2:dn	958.388	1041.66
YDL170W::chr4_2:dn	858.499	765.481
YDL171C::chr4_2:dn	37.7956	71.8387
YDL172C::chr4_2:dn	539.937	526.019
YDL173W::chr4_2:dn	405.852	268.198
YDL174C::chr4_2:dn	494.042	448.593
YDL175C::chr4_2:dn	17.098	33.5247
YDL176W::chr4_2:dn	741.513	845.302
YDL177C::chr4_2:dn	878.297	712.001
YDL178W::chr4_2:dn	1084.37	882.02
YDL179W::chr4_2:dn	885.496	1030.49
YDL180W::chr4_2:dn	866.598	886.011
YDL181W::chr4_2:dn	899.895	636.172
YDL182W::chr4_2:dn	1074.47	1203.7
YDL184C::chr4_2:dn	1105.07	1344.98
YDL185W::chr4_2:dn	1039.38	1095.14
YDL186W::chr4_2:dn	1063.68	905.966
YDL187C::chr4_2:dn	1289.55	1420.81
YDL188C::chr4_2:dn	39.5954	67.8477
YDL189W::chr4_2:dn	119.686	160.44
YDL190C::chr4_2:dn	984.485	1007.34
YDL191W::chr4_3:dn	399.553	165.229
YDL192W::chr4_3:dn	8.99895	10.3767
YDL193W::chr4_3:dn	64.7924	0.798208
YDL194W::chr00_16b:dn	1211.26	1420.81
YDL195W::chr4_3:dn	449.947	684.064
YDL196W::chr4_3:dn	635.326	474.934
YDL197C::chr4_3:dn	807.205	865.257
YDL198C::chr4_3:dn	4.49947	6.38566
YDL200C::chr4_3:dn	666.822	421.454
YDL201W::chr4_3:dn	660.523	1064.01
YDL202W::chr4_3:dn	512.94	477.328
YDL203C::chr4_3:dn	665.022	798.208
YDL204W::chr4_3:dn	427.45	407.884
YDL205C::chr4_3:dn	1177.06	1.59642
YDL206W::chr4_3:dn	471.545	314.494
YDL207W::chr4_3:dn	143.083	104.565
YDL208W::chr4_3:dn	739.713	596.261
YDL209C::chr4_3:dn	664.122	692.844
YDL210W::chr4_3:dn	634.426	674.486
YDL211C::chr4_3:dn	666.822	879.625
YDL212W::chr4_3:dn	427.45	500.476
YDL214C::chr4_3:dn	972.786	1075.19
YDL215C::chr4_3:dn	1288.65	1168.58
YDL216C::chr4_3:dn	218.674	391.122
YDL217C::chr4_3:dn	1017.78	1012.13
YDL218W::chr4_3:dn	926.891	913.948
YDL219W::chr4_3:dn	640.725	697.634
YDL220C::chr4_3:dn	287.066	398.306
YDL221W::chr4_3:dn	766.71	429.436
YDL222C::chr4_3:dn	610.129	767.876
YDL223C::chr4_3:dn	21.5975	5.58746
YDL224C::chr4_3:dn	761.311	696.835
YDL225W::chr4_3:dn	799.106	621.804
YDL226C::chr4_3:dn	1598.21	1242.01
YDL227C::chr4_3:dn	1167.16	890.8
YDL229W::chr4_3:dn	1037.58	1052.84
YDL231C::chr4_3:dn	467.045	454.978
YDL232W::chr4_3:dn	663.222	676.88
YDL233W::chr4_3:dn	364.457	367.974
YDL234C::chr4_3:dn	385.155	686.459
YDL235C::chr4_3:dn	622.727	616.216
YDL236W::chr4_3:dn	699.218	850.89
YDL237W::chr4_3:dn	814.405	541.983
YDL238C::chr4_3:dn	791.007	973.015
YDL239C::chr4_3:dn	1033.98	784.638
YDL240W::chr4_3:dn	1024.98	525.221
YDL241W::chr4_3:dn	26.9968	23.9462
YDL242W::chr4_3:dn	668.622	632.181
YDL243C::chr4_3:dn	15.2982	19.157
YDR001C::chr4_3:dn	805.406	501.275
YDR002W::chr4_3:dn	175.479	303.319
YDR003W::chr4_3:dn	852.2	578.701
YDR004W::chr4_3:dn	734.314	602.647
YDR005C::chr4_3:dn	251.071	266.601
YDR006C::chr4_3:dn	832.402	706.414
YDR007W::chr00_16b:dn	395.954	534.001
YDR008C::chr4_3:dn	1644.11	1221.26
YDR009W::chr4_3:dn	1007.88	784.638
YDR010C::chr4_3:dn	765.81	743.132
YDR011W::chr4_3:dn	782.008	723.975
YDR013W::chr4_3:dn	810.805	677.678
YDR014W::chr4_3:dn	434.649	739.14
YDR015C::chr4_3:dn	358.158	611.427
YDR016C::chr4_3:dn	884.596	847.697
YDR017C::chr4_3:dn	472.445	354.404
YDR018C::chr4_3:dn	134.084	119.731
YDR019C::chr4_3:dn	775.709	973.814
YDR020C::chr4_3:dn	661.423	571.517
YDR021W::chr4_3:dn	1006.08	1289.11
YDR022C::chr4_3:dn	1153.66	911.553
YDR023W::chr4_3:dn	987.184	709.607
YDR024W::chr4_3:dn	458.946	280.969
YDR025W::chr4_3:dn	383.355	220.305
YDR026C::chr4_3:dn	800.006	1075.98
YDR028C::chr4_3:dn	696.518	847.697
YDR029W::chr4_3:dn	504.841	288.951
YDR030C::chr4_3:dn	507.541	489.301
YDR031W::chr4_3:dn	901.694	739.14
YDR032C::chr4_3:dn	625.427	730.36
YDR033W::chr4_3:dn	117.886	43.1032
YDR035W::chr4_3:dn	446.348	502.871
YDR036C::chr4_3:dn	1069.07	1170.97
YDR037W::chr4_3:dn	647.924	704.019
YDR041W::chr00_16b:dn	920.592	808.585
YDR042C::chr4_3:dn	907.994	840.513
YDR043C::chr4_3:dn	1119.47	1185.34
YDR044W::chr4_3:dn	68.392	90.1975
YDR045C::chr4_3:dn	72.8915	74.2333
YDR046C::chr4_3:dn	1384.94	1457.53
YDR047W::chr4_3:dn	511.14	537.992
YDR048C::chr00_16b:dn	1173.46	1018.51
YDR049W::chr4_4:dn	736.114	1040.06
YDR050C::chr00_11:dn	874.698	825.347
YDR050C::chr4_4:dn	757.711	841.311
YDR051C::chr4_4:dn	744.213	878.029
YDR052C::chr4_4:dn	610.129	496.485
YDR053W::chr4_4:dn	891.796	853.284
YDR054C::chr4_4:dn	342.86	459.768
YDR056C::chr4_4:dn	550.735	649.741
YDR057W::chr4_4:dn	349.159	336.844
YDR059C::chr4_4:dn	1024.08	586.683
YDR060W::chr4_4:dn	1036.68	599.454
YDR061W::chr4_4:dn	897.195	973.814
YDR062W::chr4_4:dn	1138.37	914.746
YDR063W::chr4_4:dn	638.025	470.144
YDR064W::chr4_4:dn	411.252	274.584
YDR065W::chr4_4:dn	276.268	362.386
YDR067C::chr4_4:dn	532.738	746.324
YDR068W::chr4_4:dn	494.042	637.768
YDR069C::chr4_4:dn	227.673	375.158
YDR070C::chr4_4:dn	602.029	358.395
YDR071C::chr00_11:dn	59.393	88.6011
YDR072C::chr4_4:dn	291.566	328.862
YDR073W::chr4_4:dn	1064.58	1400.06
YDR074W::chr00_11:dn	889.996	1079.98
YDR075W::chr4_4:dn	1164.46	820.558
YDR076W::chr4_4:dn	672.221	632.979
YDR077W::chr4_4:dn	400.453	145.274
YDR078C::chr4_4:dn	595.73	639.364
YDR079W::chr4_4:dn	591.231	576.306
YDR080W::chr4_4:dn	546.236	444.602
YDR081C::chr4_4:dn	583.132	649.741
YDR082W::chr4_4:dn	23.3973	55.0763
YDR083W::chr4_4:dn	261.869	464.557
YDR084C::chr4_4:dn	351.859	452.584
YDR085C::chr4_4:dn	517.439	442.207
YDR086C::chr4_4:dn	71.9916	80.619
YDR087C::chr4_4:dn	511.14	680.073
YDR088C::chr4_4:dn	898.995	600.252
YDR091C::chr4_4:dn	341.06	261.014
YDR092W::chr4_4:dn	406.752	490.898
YDR093W::chr4_4:dn	346.459	605.042
YDR094W::chr4_4:dn	806.306	741.535
YDR095C::chr4_4:dn	426.55	488.503
YDR096W::chr4_4:dn	516.539	462.162
YDR097C::chr4_4:dn	878.297	1073.59
YDR098C::chr4_4:dn	970.986	783.042
YDR099W::chr4_4:dn	560.634	797.41
YDR100W::chr4_4:dn	84.5901	112.547
YDR101C::chr4_4:dn	331.161	273.785
YDR102C::chr4_4:dn	660.523	998.558
YDR103W::chr4_4:dn	149.383	178
YDR104C::chr4_4:dn	6.29926	11.1749
YDR105C::chr4_4:dn	574.133	583.49
YDR107C::chr4_4:dn	490.443	360.79
YDR108W::chr4_4:dn	538.137	508.458
YDR109C::chr4_4:dn	598.43	690.45
YDR110W::chr4_4:dn	413.052	606.638
YDR112W::chr4_4:dn	793.707	838.916
YDR113C::chr4_4:dn	754.112	774.262
YDR114C::chr4_4:dn	633.526	660.916
YDR115W::chr4_4:dn	506.641	510.055
YDR116C::chr4_4:dn	765.81	747.921
YDR117C::chr4_4:dn	516.539	446.198
YDR118W::chr4_4:dn	359.058	430.234
YDR120C::chr4_4:dn	456.247	520.432
YDR121W::chr4_4:dn	456.247	433.427
YDR123C::chr4_4:dn	977.286	1085.56
YDR124W::chr4_4:dn	723.515	627.391
YDR125C::chr4_4:dn	930.491	882.818
YDR127W::chr4_4:dn	471.545	459.768
YDR128W::chr4_4:dn	751.412	407.086
YDR130C::chr4_4:dn	476.944	290.548
YDR131C::chr4_4:dn	19.7977	88.6011
YDR132C::chr4_4:dn	109.787	102.969
YDR133C::chr4_4:dn	721.715	601.849
YDR134C::chr4_4:dn	838.702	1268.35
YDR135C::chr4_4:dn	1418.23	1586.84
YDR136C::chr4_4:dn	1145.57	881.221
YDR137W::chr4_4:dn	1286.85	934.701
YDR138W::chr4_4:dn	748.712	969.024
YDR139C::chr4_4:dn	1636.01	1841.47
YDR141C::chr4_4:dn	747.812	1170.97
YDR142C::chr4_4:dn	794.607	872.441
YDR143C::chr4_4:dn	977.286	1089.55
YDR144C::chr4_4:dn	1.79979	1.59642
YDR145W::chr4_4:dn	98.0885	80.619
YDR146C::chr4_4:dn	685.72	652.136
YDR148C::chr4_5:dn	102.588	109.354
YDR149C::chr4_5:dn	138.584	174.009
YDR150W::chr4_5:dn	102.588	189.973
YDR151C::chr4_5:dn	27.8967	56.6728
YDR152W::chr4_5:dn	174.58	356.001
YDR156W::chr4_5:dn	67.4921	78.2244
YDR158W::chr4_5:dn	158.381	163.633
YDR161W::chr4_5:dn	52.1939	62.2602
YDR162C::chr4_5:dn	43.1949	40.7086
YDR163W::chr4_5:dn	128.685	136.494
YDR164C::chr4_5:dn	12.5985	32.7265
YDR165W::chr4_5:dn	53.0938	69.4441
YDR166C::chr4_5:dn	49.4942	67.0495
YDR167W::chr4_5:dn	75.5911	63.0584
YDR168W::chr4_5:dn	94.4889	122.126
YDR169C::chr4_5:dn	84.5901	142.081
YDR170C::chr4_5:dn	173.68	162.036
YDR171W::chr4_5:dn	86.3899	99.776
YDR172W::chr4_5:dn	16.1981	25.5427
YDR173C::chr4_5:dn	62.9926	110.951
YDR174W::chr00_14:dn	81.8904	110.153
YDR175C::chr4_5:dn	10.7987	22.3498
YDR176W::chr4_5:dn	8.09905	15.9642
YDR177W::chr4_5:dn	55.7935	73.4351
YDR178W::chr4_5:dn	49.4942	131.704
YDR179C::chr4_5:dn	77.3909	100.574
YDR179W-A::chr4_5:dn	13.4984	33.5247
YDR180W::chr4_5:dn	19.7977	26.3409
YDR181C::chr4_5:dn	19.7977	19.9552
YDR182W::chr4_5:dn	29.6965	39.1122
YDR183W::chr4_5:dn	30.5964	35.1211
YDR184C::chr4_5:dn	26.0969	43.1032
YDR185C::chr4_5:dn	4.49947	8.78029
YDR187C::chr4_5:dn	15.2982	18.3588
YDR188W::chr4_5:dn	10.7987	21.5516
YDR190C::chr4_5:dn	12.5985	13.5695
YDR191W::chr4_5:dn	43.1949	69.4441
YDR192C::chr4_5:dn	35.9958	39.9104
YDR193W::chr4_5:dn	23.3973	23.9462
YDR194C::chr4_5:dn	16.1981	23.9462
YDR195W::chr4_5:dn	18.8978	31.1301
YDR196C::chr4_5:dn	69.2919	108.556
YDR197W::chr4_5:dn	64.7924	75.8297
YDR198C::chr4_5:dn	37.7956	102.171
YDR199W::chr4_5:dn	24.2972	39.1122
YDR200C::chr4_5:dn	16.1981	38.314
YDR201W::chr4_5:dn	8.09905	3.99104
YDR202C::chr00_14:dn	154.782	173.211
YDR203W::chr4_5:dn	9.89884	13.5695
YDR205W::chr00_14:dn	20.6976	30.3319
YDR206W::chr4_5:dn	12.5985	17.5606
YDR207C::chr4_5:dn	15.2982	19.157
YDR208W::chr4_5:dn	14.3983	19.9552
YDR209C::chr4_5:dn	9.89884	15.9642
YDR211W::chr4_5:dn	35.0959	40.7086
YDR212W::chr4_5:dn	18.8978	27.1391
YDR214W::chr4_5:dn	51.294	73.4351
YDR215C::chr4_5:dn	20.6976	48.6907
YDR216W::chr4_5:dn	124.185	167.624
YDR218C::chr4_5:dn	12.5985	23.9462
YDR219C::chr4_5:dn	24.2972	25.5427
YDR220C::chr4_5:dn	14.3983	15.1659
YDR222W::chr4_5:dn	80.9905	152.458
YDR223W::chr4_5:dn	16.1981	31.1301
YDR224C::chr4_5:dn	304.164	512.449
YDR225W::chr4_5:dn	36.8957	38.314
YDR226W::chr4_5:dn	85.49	142.081
YDR228C::chr4_5:dn	141.283	141.283
YDR229W::chr4_5:dn	135.884	172.413
YDR230W::chr4_5:dn	38.6955	56.6728
YDR231C::chr4_5:dn	126.885	135.695
YDR232W::chr4_5:dn	2.69968	7.98208
YDR233C::chr4_5:dn	43.1949	53.4799
YDR234W::chr4_5:dn	112.487	126.117
YDR235W::chr4_5:dn	17.098	19.157
YDR236C::chr4_5:dn	17.9979	23.9462
YDR237W::chr4_5:dn	9.89884	14.3677
YDR238C::chr4_5:dn	16.1981	15.9642
YDR239C::chr4_5:dn	62.9926	91.7939
YDR240C::chr4_5:dn	8.09905	17.5606
YDR241W::chr4_5:dn	64.7924	90.9957
YDR242W::chr00_17a:dn	2711.38	2598.17
YDR243C::chr4_6:dn	23.3973	27.1391
YDR245W::chr4_6:dn	24.2972	30.3319
YDR246W::chr4_6:dn	117.886	88.6011
YDR247W::chr4_6:dn	48.5943	31.1301
YDR248C::chr4_6:dn	17.9979	23.9462
YDR249C::chr4_6:dn	19.7977	23.9462
YDR250C::chr4_6:dn	17.098	40.7086
YDR251W::chr4_6:dn	47.6944	79.8208
YDR252W::chr4_6:dn	18.8978	49.4889
YDR253C::chr4_6:dn	26.9968	27.9373
YDR254W::chr4_6:dn	18.8978	36.7176
YDR255C::chr4_6:dn	15.2982	18.3588
YDR257C::chr4_6:dn	17.098	24.7444
YDR258C::chr4_6:dn	21.5975	43.9014
YDR259C::chr4_6:dn	23.3973	37.5158
YDR260C::chr4_6:dn	132.285	54.2781
YDR261C::chr4_6:dn	35.0959	35.1211
YDR262W::chr4_6:dn	38.6955	67.8477
YDR263C::chr4_6:dn	8.09905	9.57849
YDR264C::chr4_6:dn	10.7987	11.1749
YDR265W::chr4_6:dn	8.99895	22.3498
YDR266C::chr4_6:dn	21.5975	32.7265
YDR267C::chr4_6:dn	7.19916	0.798208
YDR268W::chr4_6:dn	20.6976	32.7265
YDR269C::chr4_6:dn	11.6986	30.3319
YDR271C::chr4_6:dn	6.29926	8.78029
YDR272W::chr4_6:dn	44.9947	59.0674
YDR273W::chr4_6:dn	28.7966	83.8118
YDR274C::chr4_6:dn	29.6965	37.5158
YDR276C::chr4_6:dn	48.5943	58.2692
YDR277C::chr4_6:dn	40.4953	72.6369
YDR278C::chr4_6:dn	65.6923	78.2244
YDR279W::chr4_6:dn	25.197	29.5337
YDR280W::chr4_6:dn	5.39937	6.38566
YDR283C::chr4_6:dn	15.2982	19.9552
YDR284C::chr4_6:dn	17.9979	20.7534
YDR285W::chr4_6:dn	3.59958	8.78029
YDR286C::chr4_6:dn	3.59958	7.18387
YDR287W::chr4_6:dn	5.39937	14.3677
YDR288W::chr4_6:dn	45.8946	76.628
YDR289C::chr4_6:dn	95.3888	75.8297
YDR292C::chr4_6:dn	9.89884	18.3588
YDR293C::chr4_6:dn	11.6986	17.5606
YDR294C::chr4_6:dn	93.589	139.686
YDR295C::chr4_6:dn	109.787	109.354
YDR296W::chr4_6:dn	53.0938	72.6369
YDR297W::chr4_6:dn	22.4974	15.9642
YDR299W::chr4_6:dn	57.5933	52.6817
YDR300C::chr4_6:dn	81.8904	110.951
YDR301W::chr4_6:dn	12.5985	51.8835
YDR302W::chr4_6:dn	7.19916	13.5695
YDR303C::chr4_6:dn	59.393	148.467
YDR305C::chr4_6:dn	13.4984	4.78925
YDR306C::chr4_6:dn	19.7977	4.78925
YDR307W::chr4_6:dn	58.4931	82.2154
YDR308C::chr4_6:dn	8.99895	8.78029
YDR309C::chr4_6:dn	6.29926	9.57849
YDR310C::chr4_6:dn	16.1981	12.7713
YDR312W::chr4_6:dn	56.6934	74.2333
YDR313C::chr4_6:dn	8.09905	10.3767
YDR314C::chr4_6:dn	5.39937	9.57849
YDR316W::chr4_6:dn	2.69968	8.78029
YDR318W::chr4_6:dn	20.6976	35.1211
YDR319C::chr4_6:dn	8.09905	3.99104
YDR320C::chr4_6:dn	16.1981	23.9462
YDR321W::chr4_6:dn	22.4974	36.7176
YDR323C::chr4_6:dn	3.59958	17.5606
YDR324C::chr4_6:dn	30.5964	29.5337
YDR326C::chr00_17a:dn	89.0896	146.87
YDR327W::chr4_6:dn	106.188	117.337
YDR328C::chr4_6:dn	0.899895	9.57849
YDR329C::chr4_6:dn	8.99895	21.5516
YDR330W::chr4_6:dn	49.4942	73.4351
YDR331W::chr4_6:dn	17.098	13.5695
YDR332W::chr4_6:dn	28.7966	22.3498
YDR333C::chr4_6:dn	10.7987	25.5427
YDR334W::chr4_6:dn	78.2908	113.346
YDR335W::chr4_6:dn	4.49947	11.9731
YDR337W::chr4_6:dn	6.29926	15.9642
YDR338C::chr4_7:dn	17.9979	42.305
YDR339C::chr4_7:dn	2.69968	8.78029
YDR340W::chr4_7:dn	33.2961	70.2423
YDR341C::chr4_7:dn	21.5975	36.7176
YDR345C::chr4_7:dn	9.89884	19.9552
YDR346C::chr4_7:dn	7.19916	11.1749
YDR347W::chr4_7:dn	5.39937	19.157
YDR348C::chr4_7:dn	78.2908	61.462
YDR349C::chr4_7:dn	10.7987	12.7713
YDR350C::chr4_7:dn	82.7903	130.108
YDR351W::chr4_7:dn	9.89884	17.5606
YDR352W::chr4_7:dn	72.8915	73.4351
YDR353W::chr4_7:dn	7.19916	20.7534
YDR354W::chr4_7:dn	32.3962	85.4082
YDR355C::chr4_7:dn	29.6965	37.5158
YDR356W::chr4_7:dn	11.6986	21.5516
YDR357C::chr4_7:dn	19.7977	38.314
YDR358W::chr4_7:dn	4.49947	8.78029
YDR359C::chr4_7:dn	6.29926	18.3588
YDR360W::chr4_7:dn	6.29926	20.7534
YDR361C::chr4_7:dn	31.4963	55.0763
YDR363W-A::chr00_2:dn	14.3983	21.5516
YDR363W::chr4_7:dn	16.1981	39.9104
YDR364C::chr4_7:dn	10.7987	23.9462
YDR365C::chr4_7:dn	3.59958	14.3677
YDR368W::chr4_7:dn	7.19916	23.9462
YDR369C::chr4_7:dn	7.19916	18.3588
YDR374C::chr4_7:dn	7.19916	15.1659
YDR376W::chr4_7:dn	76.491	148.467
YDR377W::chr4_7:dn	4.49947	8.78029
YDR378C::chr4_7:dn	13.4984	23.9462
YDR379W::chr4_7:dn	39.5954	47.8925
YDR380W::chr4_7:dn	7.19916	10.3767
YDR383C::chr4_7:dn	36.8957	62.2602
YDR384C::chr4_7:dn	8.99895	21.5516
YDR385W::chr4_7:dn	19.7977	24.7444
YDR386W::chr4_7:dn	35.9958	55.8746
YDR387C::chr4_7:dn	10.7987	27.9373
YDR388W::chr4_7:dn	8.99895	10.3767
YDR389W::chr4_7:dn	15.2982	23.9462
YDR390C::chr4_7:dn	4.49947	17.5606
YDR391C::chr4_7:dn	43.1949	44.6996
YDR392W::chr4_7:dn	53.0938	97.3814
YDR393W::chr4_7:dn	13.4984	23.9462
YDR394W::chr4_7:dn	8.99895	11.1749
YDR395W::chr4_7:dn	14.3983	27.9373
YDR397C::chr4_7:dn	16.1981	12.7713
YDR398W::chr4_7:dn	16.1981	25.5427
YDR400W::chr4_7:dn	9.89884	27.1391
YDR401W::chr4_7:dn	5.39937	10.3767
YDR403W::chr4_7:dn	33.2961	34.3229
YDR404C::chr4_7:dn	13.4984	11.9731
YDR405W::chr4_7:dn	3.59958	19.9552
YDR407C::chr4_7:dn	71.9916	81.4172
YDR411C::chr4_7:dn	9.89884	19.157
YDR412W::chr4_7:dn	35.0959	61.462
YDR413C::chr4_7:dn	9.89884	27.9373
YDR414C::chr4_7:dn	8.09905	7.98208
YDR416W::chr4_7:dn	9.89884	25.5427
YDR419W::chr4_7:dn	3.59958	21.5516
YDR420W::chr4_7:dn	11.6986	31.9283
YDR423C::chr4_7:dn	4.49947	12.7713
YDR425W::chr4_7:dn	1.79979	22.3498
YDR426C::chr4_7:dn	20.6976	20.7534
YDR427W::chr4_7:dn	13.4984	23.9462
YDR428C::chr4_7:dn	43.1949	53.4799
YDR430C::chr4_7:dn	27.8967	61.462
YDR431W::chr4_7:dn	34.196	43.9014
YDR433W::chr4_7:dn	8.09905	9.57849
YDR434W::chr4_7:dn	45.8946	87.8029
YDR435C::chr4_7:dn	34.196	29.5337
YDR436W::chr4_7:dn	22.4974	60.6638
YDR437W::chr4_8:dn	1027.68	1494.25
YDR438W::chr4_8:dn	810.805	1108.71
YDR439W::chr4_8:dn	1421.83	1023.3
YDR440W::chr4_8:dn	674.921	1037.67
YDR441C::chr4_8:dn	1.79979	11.1749
YDR443C::chr4_8:dn	1069.07	807.786
YDR444W::chr00_17a:dn	13.4984	25.5427
YDR445C::chr00_14:dn	29.6965	28.7355
YDR446W::chr4_8:dn	647.924	544.378
YDR447C::chr4_8:dn	503.041	783.042
YDR449C::chr4_8:dn	1168.06	856.477
YDR450W::chr4_8:dn	17.098	403.095
YDR451C::chr4_8:dn	918.792	1339.39
YDR452W::chr4_8:dn	905.294	821.356
YDR453C::chr4_8:dn	730.714	431.83
YDR454C::chr4_8:dn	495.842	542.781
YDR455C::chr4_8:dn	742.413	783.042
YDR456W::chr4_8:dn	1100.57	1180.55
YDR457W::chr4_8:dn	268.169	402.297
YDR458C::chr4_8:dn	1200.46	1549.32
YDR459C::chr4_8:dn	570.533	558.746
YDR460W::chr4_8:dn	976.386	615.418
YDR461W::chr00_17a:dn	17.098	22.3498
YDR462W::chr4_8:dn	1166.26	1649.1
YDR463W::chr4_8:dn	1709.8	1559.7
YDR464W::chr4_8:dn	1083.47	917.141
YDR465C::chr4_8:dn	38.6955	55.8746
YDR466W::chr4_8:dn	952.988	1222.85
YDR467C::chr4_8:dn	1219.36	925.123
YDR468C::chr4_8:dn	976.386	1273.14
YDR469W::chr4_8:dn	852.2	871.643
YDR470C::chr4_8:dn	298.765	541.185
YDR471W::chr4_8:dn	847.701	709.607
YDR472W::chr4_8:dn	536.337	535.597
YDR473C::chr4_8:dn	309.564	458.97
YDR474C::chr4_8:dn	1427.23	1701.78
YDR475C::chr4_8:dn	1369.64	1129.46
YDR476C::chr4_8:dn	923.292	818.163
YDR477W::chr4_8:dn	1199.56	1275.54
YDR478W::chr4_8:dn	315.863	536.396
YDR479C::chr4_8:dn	958.388	890.002
YDR480W::chr4_8:dn	573.233	819.759
YDR481C::chr4_8:dn	707.317	685.661
YDR482C::chr4_8:dn	904.394	1276.33
YDR483W::chr4_8:dn	330.261	375.158
YDR484W::chr4_8:dn	89.0896	122.126
YDR485C::chr4_8:dn	830.603	790.226
YDR486C::chr4_8:dn	1412.83	1286.71
YDR487C::chr4_8:dn	1225.66	877.23
YDR488C::chr4_8:dn	742.413	893.993
YDR489W::chr4_8:dn	875.597	751.114
YDR490C::chr4_8:dn	14.3983	23.9462
YDR491C::chr4_8:dn	1206.76	831.733
YDR492W::chr4_8:dn	1245.45	882.818
YDR493W::chr00_17a:dn	1777.29	897.984
YDR494W::chr4_8:dn	850.4	928.316
YDR495C::chr4_8:dn	1126.67	1298.68
YDR496C::chr4_8:dn	1034.88	1212.48
YDR497C::chr4_8:dn	827.003	600.252
YDR498C::chr00_17a:dn	1123.97	1196.51
YDR500C::chr00_17a:dn	7.19916	25.5427
YDR500C::chr4_8:dn	363.557	276.18
YDR502C::chr00_17a:dn	960.188	993.769
YDR503C::chr4_8:dn	1164.46	1442.36
YDR504C::chr4_8:dn	1207.66	1164.59
YDR505C::chr4_8:dn	920.592	1181.35
YDR506C::chr00_17a:dn	1445.23	1291.5
YDR506C::chr4_8:dn	5.39937	5.58746
YDR507C::chr4_8:dn	28.7966	39.1122
YDR508C::chr4_8:dn	1077.17	887.607
YDR509W::chr4_8:dn	1152.76	1260.37
YDR510W::chr4_8:dn	1871.78	1533.36
YDR511W::chr4_8:dn	1231.06	1747.28
YDR512C::chr00_17a:dn	13.4984	42.305
YDR512C::chr4_8:dn	777.509	988.98
YDR513W::chr4_8:dn	1177.06	892.396
YDR514C::chr4_8:dn	1105.07	828.54
YDR515W::chr00_17a:dn	881.897	1310.66
YDR516C::chr4_8:dn	19.7977	34.3229
YDR517W::chr4_8:dn	2515.21	2606.15
YDR518W::chr4_8:dn	62.9926	92.5921
YDR519W::chr4_8:dn	559.734	1080.77
YDR520C::chr4_8:dn	1433.53	1000.15
YDR521W::chr4_8:dn	1275.15	1669.05
YDR522C::chr4_8:dn	2395.52	2462.47
YDR523C::chr4_8:dn	1849.28	1693
YDR524C::chr4_8:dn	1650.41	1625.95
YDR525W-A::chr00_2:dn	72.8915	87.8029
YDR525W::chr4_8:dn	1324.64	1335.4
YDR526C::chr00_17a:dn	834.202	750.315
YDR527W::chr4_8:dn	1556.82	2003.5
YDR528W::chr4_8:dn	13.4984	16.7624
YDR529C::chr4_8:dn	1523.52	1688.21
YDR530C::chr4_8:dn	169.18	265.005
YDR531W::chr4_8:dn	1489.33	1112.7
YDR532C::chr4_8:dn	1573.02	1376.91
YDR533C::chr4_8:dn	1420.93	1361.74
YDR534C::chr4_8:dn	1709.8	1445.55
YDR535C::chr00_2:dn	3.59958	7.18387
YDR536W::chr00_2:dn	87.2898	147.668
YDR537C::chr00_14:dn	17.9979	35.1211
YDR538W::chr00_2:dn	72.8915	115.74
YDR539W::chr00_2:dn	1042.98	1044.85
YDR540C::chr00_2:dn	999.783	1045.65
YDR541C::chr00_2:dn	830.603	996.163
YEL001C::chr5_2:dn	1991.47	1589.23
YEL002C::chr5_2:dn	49.4942	110.951
YEL004W::chr5_2:dn	1530.72	1875.79
YEL007W::chr5_2:dn	57.5933	85.4082
YEL008W::chr5_2:dn	983.585	1449.55
YEL009C::chr5_2:dn	477.844	609.033
YEL010W::chr5_2:dn	17.098	19.9552
YEL011W::chr00_8:dn	12.5985	30.3319
YEL014C::chr5_2:dn	774.809	500.476
YEL015W::chr5_2:dn	878.297	1020.11
YEL016C::chr5_2:dn	1317.45	1457.53
YEL017C-A::chr5_2:dn	1110.47	799.006
YEL017W::chr5_2:dn	933.191	726.369
YEL018W::chr5_2:dn	892.695	814.97
YEL019C::chr5_2:dn	760.411	805.392
YEL020C::chr5_2:dn	1030.38	1107.11
YEL023C::chr5_2:dn	235.772	247.444
YEL024W::chr5_2:dn	1371.44	852.486
YEL025C::chr5_2:dn	1147.37	1168.58
YEL026W::chr5_2:dn	945.789	1288.31
YEL027W::chr5_2:dn	834.202	668.898
YEL028W::chr5_2:dn	825.203	515.642
YEL029C::chr5_2:dn	1004.28	1406.44
YEL030W::chr5_2:dn	977.286	1223.65
YEL031W::chr5_2:dn	839.602	893.195
YEL032W::chr5_2:dn	1010.58	821.356
YEL033W::chr5_2:dn	922.392	721.58
YEL034W::chr00_8:dn	962.887	557.947
YEL035C::chr5_2:dn	1204.06	1079.98
YEL036C::chr5_2:dn	17.9979	21.5516
YEL037C::chr5_2:dn	633.526	629.786
YEL039C::chr5_2:dn	5.39937	19.157
YEL040W::chr5_2:dn	142.183	168.422
YEL043W::chr5_2:dn	170.98	284.162
YEL044W::chr5_2:dn	8.09905	11.1749
YEL045C::chr5_2:dn	934.091	1162.19
YEL046C::chr5_2:dn	630.826	511.651
YEL047C::chr5_2:dn	1785.39	1314.65
YEL048C::chr5_2:dn	6.29926	16.7624
YEL049W::chr5_2:dn	1205.86	1103.12
YEL050C::chr5_2:dn	143.983	140.485
YEL051W::chr5_2:dn	116.086	84.61
YEL052W::chr5_2:dn	945.789	781.445
YEL053C::chr5_2:dn	943.989	577.902
YEL054C::chr5_2:dn	593.031	409.481
YEL055C::chr5_2:dn	118.786	186.781
YEL056W::chr5_2:dn	14.3983	18.3588
YEL057C::chr5_2:dn	2.69968	13.5695
YEL058W::chr5_2:dn	911.593	909.957
YEL059W::chr5_2:dn	1205.86	1431.98
YEL060C::chr5_2:dn	89.9895	103.767
YEL062W::chr5_2:dn	20.6976	32.7265
YEL063C::chr5_2:dn	453.547	539.589
YEL064C::chr5_2:dn	527.338	600.252
YEL065W::chr5_2:dn	936.79	925.123
YEL066W::chr5_2:dn	1012.38	795.015
YEL067C::chr5_2:dn	750.512	797.41
YEL068C::chr5_2:dn	349.159	446.996
YEL071W::chr5_2:dn	1199.56	1068.8
YEL072W::chr5_2:dn	125.085	175.606
YER001W::chr5_2:dn	1145.57	760.692
YER003C::chr5_2:dn	1862.78	1703.38
YER005W::chr5_2:dn	1536.12	1468.7
YER006W::chr5_2:dn	111.587	106.162
YER007C-A::chr5_2:dn	547.136	603.445
YER007W::chr5_2:dn	22.4974	40.7086
YER008C::chr5_2:dn	7.19916	25.5427
YER009W::chr5_2:dn	4.49947	40.7086
YER010C::chr5_2:dn	800.906	947.473
YER013W::chr5_2:dn	1483.93	1455.93
YER014C-A::chr5_3:dn	13.4984	43.1032
YER014W::chr5_2:dn	169.18	268.198
YER016W::chr5_3:dn	3.59958	8.78029
YER017C::chr5_3:dn	4.49947	9.57849
YER019C-A::chr5_3:dn	1423.63	1776.01
YER019W::chr5_3:dn	93.589	178.799
YER020W::chr5_3:dn	1654.01	838.118
YER021W::chr5_3:dn	1168.06	1013.72
YER022W::chr5_3:dn	1036.68	1129.46
YER023W::chr5_3:dn	1268.85	854.082
YER024W::chr5_3:dn	1584.71	1684.22
YER025W::chr5_3:dn	101.688	81.4172
YER027C::chr00_11:dn	592.131	389.525
YER027C::chr5_3:dn	687.519	1016.92
YER028C::chr5_3:dn	1066.38	1386.49
YER031C::chr00_10:dn	615.528	636.172
YER032W::chr5_3:dn	2.69968	3.99104
YER033C::chr5_3:dn	64.7924	87.8029
YER034W::chr5_3:dn	817.104	701.625
YER035W::chr5_3:dn	1003.38	954.657
YER036C::chr5_3:dn	1386.74	941.885
YER037W::chr00_11:dn	999.783	945.078
YER037W::chr5_3:dn	674.921	697.634
YER038C::chr5_3:dn	123.286	87.0047
YER038W-A::chr5_3:dn	648.824	573.911
YER039C::chr5_3:dn	16.1981	22.3498
YER040W::chr5_3:dn	12.5985	44.6996
YER041W::chr5_3:dn	87.2898	170.018
YER042W::chr5_3:dn	1023.18	973.015
YER043C::chr5_3:dn	8.09905	11.1749
YER044C-A::chr5_3:dn	1177.96	1105.52
YER044C::chr5_3:dn	8.99895	19.157
YER045C::chr5_3:dn	17.098	15.9642
YER046W-A::chr5_3:dn	12.5985	34.3229
YER046W::chr00_10:dn	100.788	229.884
YER047C::chr5_3:dn	907.994	1080.77
YER048C::chr5_3:dn	368.957	516.44
YER048W-A::chr00_2:dn	53.0938	67.0495
YER049W::chr5_3:dn	845.001	708.01
YER050C::chr5_3:dn	26.9968	21.5516
YER051W::chr5_3:dn	984.485	888.405
YER052C::chr5_3:dn	822.504	244.252
YER054C::chr5_3:dn	4.49947	8.78029
YER055C::chr5_3:dn	12.5985	12.7713
YER056C-A::chr5_3:dn	420.251	541.983
YER056C::chr5_3:dn	669.522	621.804
YER057C::chr5_3:dn	110.687	114.942
YER058W::chr5_3:dn	9.89884	16.7624
YER059W::chr5_3:dn	3.59958	13.5695
YER060W-A::chr5_3:dn	7.19916	19.9552
YER060W::chr5_3:dn	32.3962	15.1659
YER061C::chr5_3:dn	32.3962	67.8477
YER062C::chr5_3:dn	13.4984	19.9552
YER063W::chr00_10:dn	565.134	778.253
YER064C::chr00_8:dn	14.3983	33.5247
YER065C::chr5_3:dn	41.3952	87.0047
YER066C-A::chr5_3:dn	5.39937	27.1391
YER066W::chr00_10:dn	6.29926	12.7713
YER067C-A::chr5_3:dn	44.0948	87.0047
YER068C-A::chr5_3:dn	9.89884	32.7265
YER068W::chr5_3:dn	872.898	734.351
YER069W::chr5_3:dn	17.9979	31.9283
YER070W::chr5_3:dn	58.4931	61.462
YER071C::chr5_3:dn	251.97	338.44
YER072W::chr5_3:dn	30.5964	13.5695
YER073W::chr5_3:dn	1131.17	1201.3
YER074W::chr5_3:dn	708.217	146.87
YER075C::chr5_3:dn	1315.65	1314.65
YER077C::chr00_8:dn	5.39937	8.78029
YER078C::chr00_8:dn	30.5964	54.2781
YER079W::chr5_3:dn	1456.03	1174.96
YER080W::chr5_3:dn	1038.48	1085.56
YER081W::chr5_3:dn	953.888	996.962
YER082C::chr5_3:dn	1530.72	1685.82
YER083C::chr5_3:dn	1038.48	1061.62
YER084W::chr5_3:dn	936.79	1007.34
YER085C::chr5_3:dn	1001.58	1155.01
YER086W::chr5_3:dn	378.856	599.454
YER087C-A::chr5_3:dn	68.392	98.9778
YER087W::chr5_3:dn	1337.24	1026.5
YER088C::chr00_8:dn	65.6923	149.265
YER089C::chr00_17a:dn	871.098	648.145
YER090W::chr00_8:dn	757.711	973.814
YER091C-A::chr00_2:dn	985.385	742.333
YER091C::chr00_8:dn	12.5985	53.4799
YER092W::chr00_8:dn	6.29926	18.3588
YER093C-A::chr00_8:dn	1441.63	931.509
YER095W::chr00_8:dn	8.99895	10.3767
YER096W::chr00_8:dn	1145.57	789.428
YER097W::chr00_8:dn	559.734	447.795
YER098W::chr00_8:dn	10.7987	18.3588
YER101C::chr00_5:dn	6.29926	11.9731
YER103W::chr00_5:dn	8.09905	18.3588
YER104W::chr00_5:dn	35.0959	31.9283
YER106W::chr00_5:dn	101.688	122.924
YER109C::chr00_5:dn	17.098	28.7355
YER110C::chr00_5:dn	1496.52	1435.98
YER112W::chr00_5:dn	914.293	1250.79
YER114C::chr00_5:dn	606.529	442.207
YER115C::chr00_5:dn	467.945	292.942
YER116C::chr00_5:dn	729.815	538.79
YER117W::chr00_5:dn	602.029	244.252
YER118C::chr00_5:dn	17.9979	21.5516
YER119C-A::chr00_5:dn	697.418	884.414
YER119C::chr00_5:dn	778.409	534.799
YER120W::chr00_5:dn	870.198	1021.71
YER121W::chr00_5:dn	198.877	175.606
YER122C::chr00_5:dn	1015.98	944.28
YER123W::chr00_5:dn	43.1949	69.4441
YER124C::chr00_5:dn	706.417	1097.54
YER125W::chr00_5:dn	656.023	793.419
YER126C::chr00_5:dn	773.009	795.015
YER127W::chr00_5:dn	81.8904	117.337
YER128W::chr00_5:dn	825.203	1017.72
YER129W::chr00_5:dn	4.49947	16.7624
YER130C::chr00_5:dn	512.04	475.732
YER131W::chr00_5:dn	80.0906	59.0674
YER132C::chr00_5:dn	8.09905	15.1659
YER133W::chr00_5:dn	621.827	463.759
YER134C::chr00_5:dn	9.89884	32.7265
YER135C::chr00_5:dn	2.69968	18.3588
YER136W::chr00_5:dn	5.39937	10.3767
YER137C::chr00_5:dn	74.6913	84.61
YER139C::chr00_5:dn	46.7945	70.2423
YER140W::chr00_5:dn	29.6965	27.9373
YER141W::chr00_5:dn	16.1981	7.18387
YER142C::chr00_5:dn	424.75	365.579
YER143W::chr00_5:dn	6.29926	11.1749
YER144C::chr00_2:dn	648.824	652.934
YER145C::chr00_5:dn	26.0969	28.7355
YER146W::chr00_5:dn	809.005	792.62
YER147C::chr00_5:dn	3.59958	13.5695
YER148W::chr00_5:dn	26.9968	39.1122
YER149C::chr00_5:dn	16.1981	15.1659
YER150W::chr00_5:dn	24.2972	79.0226
YER151C::chr00_5:dn	2.69968	10.3767
YER152C::chr00_5:dn	37.7956	73.4351
YER153C::chr00_5:dn	32.3962	53.4799
YER154W::chr00_5:dn	29.6965	25.5427
YER155C::chr00_5:dn	12.5985	38.314
YER156C::chr00_5:dn	893.595	758.297
YER158C::chr00_5:dn	721.715	791.822
YER159C::chr00_5:dn	48.5943	55.8746
YER161C::chr00_5:dn	39.5954	44.6996
YER162C::chr00_5:dn	318.563	70.2423
YER164W::chr00_5:dn	997.983	1033.68
YER165W::chr00_5:dn	26.0969	35.1211
YER166W::chr00_5:dn	7.19916	23.148
YER167W::chr00_5:dn	53.0938	65.453
YER168C::chr00_5:dn	23.3973	39.9104
YER169W::chr00_5:dn	870.198	842.908
YER170W::chr00_5:dn	26.0969	43.1032
YER172C::chr00_5:dn	1385.84	1124.67
YER174C::chr00_5:dn	64.7924	97.3814
YER175C::chr00_5:dn	13.4984	62.2602
YER176W::chr00_5:dn	585.831	679.275
YER177W::chr00_5:dn	13.4984	11.9731
YER178W::chr00_5:dn	486.843	621.006
YER179W::chr00_5:dn	251.97	498.88
YER180C::chr00_5:dn	35.0959	47.8925
YER181C::chr00_5:dn	40.4953	34.3229
YER182W::chr00_5:dn	19.7977	35.9194
YER183C::chr00_5:dn	14.3983	27.9373
YER184C::chr00_5:dn	89.9895	121.328
YER185W::chr00_5:dn	182.679	285.758
YER186C::chr00_5:dn	110.687	37.5158
YER187W::chr00_5:dn	157.482	152.458
YER188W::chr00_2:dn	529.138	691.248
YFL001W::chr00_17a:dn	97.1886	114.144
YFL002C::chr00_17a:dn	629.026	672.889
YFL003C::chr00_17a:dn	2102.15	1878.98
YFL004W::chr00_17a:dn	8.09905	10.3767
YFL006W::chr6_1:dn	25.197	30.3319
YFL007W::chr00_17a:dn	22.4974	23.148
YFL008W::chr6_1:dn	31.4963	52.6817
YFL009W::chr6_1:dn	619.127	681.67
YFL010C::chr00_17a:dn	1322.85	1396.86
YFL010W-A::chr00_17a:dn	9.89884	14.3677
YFL011W::chr6_1:dn	8.09905	11.1749
YFL012W::chr00_17a:dn	31.4963	76.628
YFL013C::chr00_17a:dn	16.1981	47.8925
YFL013W-A::chr00_15:dn	48.5943	69.4441
YFL014W::chr00_15:dn	1421.83	1139.04
YFL016C::chr00_17a:dn	43.1949	62.2602
YFL017C::chr6_1:dn	76.491	142.081
YFL018C::chr6_1:dn	1101.47	1033.68
YFL018W-A::chr6_1:dn	64.7924	111.749
YFL019C::chr00_15:dn	19.7977	28.7355
YFL020C::chr6_1:dn	971.886	1070.4
YFL021W::chr6_1:dn	26.9968	71.0405
YFL023W::chr6_1:dn	12.5985	26.3409
YFL025C::chr6_1:dn	11.6986	26.3409
YFL026W::chr00_16b:dn	10.7987	11.9731
YFL026W::chr6_1:dn	1016.88	890.002
YFL027C::chr6_1:dn	1026.78	781.445
YFL028C::chr6_1:dn	1013.28	969.823
YFL029C::chr00_18:dn	28.7966	44.6996
YFL030W::chr6_1:dn	12.5985	28.7355
YFL031W::chr6_1:dn	1086.17	1329.81
YFL032W::chr6_1:dn	1478.53	1587.64
YFL033C::chr00_17a/chr00_18:dn	107.987	136.494
YFL034C-A::chr00_2:dn	521.939	459.768
YFL034W::chr6_1:dn	1427.23	1311.46
YFL035C-A::chr6_1:dn	532.738	369.57
YFL035C-B::chr6_1:dn	129.585	98.1796
YFL035C::chr6_1:dn	948.489	957.849
YFL036W::chr6_1:dn	37.7956	60.6638
YFL037W::chr6_1:dn	6.29926	12.7713
YFL038C::chr6_1:dn	139.484	162.036
YFL039C::chr00_15:dn	13.4984	7.98208
YFL040W::chr6_1:dn	8.99895	28.7355
YFL041W::chr6_1:dn	1003.38	617.813
YFL042C::chr00_15:dn	45.8946	99.776
YFL043C::chr6_1:dn	23.3973	51.8835
YFL044C::chr6_1:dn	6.29926	11.9731
YFL045C::chr6_1:dn	16.1981	21.5516
YFL047W::chr6_1:dn	1284.15	935.5
YFL048C::chr6_1:dn	9.89884	24.7444
YFL049W::chr6_1:dn	905.294	780.647
YFL050C::chr6_1:dn	453.547	390.324
YFL051C::chr6_1:dn	1442.53	1486.26
YFL052W::chr6_1:dn	1118.57	687.257
YFL053W::chr6_1:dn	29.6965	35.1211
YFL054C::chr6_1:dn	12.5985	15.9642
YFL055W::chr6_1:dn	31.4963	52.6817
YFL056C::chr6_1:dn	791.907	732.755
YFL060C::chr00_18:dn	29.6965	21.5516
YFR001W::chr6_1:dn	908.894	1112.7
YFR002W::chr00_18:dn	996.183	718.387
YFR003C::chr6_1:dn	16.1981	20.7534
YFR004W::chr6_1:dn	236.672	2.39462
YFR005C::chr6_1:dn	1026.78	938.692
YFR006W::chr6_1:dn	1109.57	955.455
YFR007W::chr6_1:dn	1188.76	895.589
YFR008W::chr6_1:dn	955.688	918.737
YFR009W::chr6_1:dn	710.917	877.23
YFR010W::chr6_1:dn	17.098	24.7444
YFR011C::chr00_16b:dn	78.2908	130.108
YFR011C::chr6_1:dn	1231.96	761.49
YFR012W::chr6_1:dn	1468.63	1010.53
YFR013W::chr00_16b:dn	17.9979	34.3229
YFR013W::chr6_1:dn	8.99895	30.3319
YFR015C::chr6_1:dn	1051.98	1226.05
YFR016C::chr6_1:dn	12.5985	30.3319
YFR017C::chr6_1:dn	38.6955	48.6907
YFR019W::chr00_15:dn	1557.72	1257.18
YFR020W::chr6_1:dn	50.3941	15.9642
YFR021W::chr6_1:dn	1918.58	1622.76
YFR022W::chr6_1:dn	170.98	233.875
YFR023W::chr6_1:dn	67.4921	124.52
YFR024C-A::chr6_1:dn	23.3973	47.0943
YFR024C::chr00_15:dn	691.119	609.033
YFR026C::chr6_1:dn	61.1928	94.9867
YFR027W::chr6_1:dn	2137.25	2046.6
YFR028C::chr00_15:dn	31.4963	23.148
YFR031C-A::chr6_1:dn	2849.07	2749.83
YFR031C::chr00_15:dn	15.2982	13.5695
YFR032C::chr00_2:dn	1187.86	1257.18
YFR033C::chr00_2:dn	104.388	139.686
YFR034C::chr00_2:dn	23.3973	36.7176
YFR035C::chr00_2:dn	1276.05	1177.36
YFR036W::chr00_2:dn	1129.37	1009.73
YFR037C::chr00_2:dn	88.1897	107.758
YFR039C::chr00_14:dn	925.992	902.773
YFR040W::chr00_2:dn	13.4984	17.5606
YFR041C::chr00_2:dn	7.19916	12.7713
YFR042W::chr00_2:dn	12.5985	40.7086
YFR043C::chr00_2:dn	15.2982	23.148
YFR044C::chr00_2:dn	6.29926	24.7444
YFR045W::chr00_2:dn	81.8904	68.6459
YFR046C::chr00_2:dn	4.49947	28.7355
YFR047C::chr00_2:dn	2.69968	11.1749
YFR048W::chr00_2:dn	737.014	827.742
YFR049W::chr00_2:dn	682.12	1128.67
YFR050C::chr00_2:dn	37.7956	45.4978
YFR051C::chr00_2:dn	62.9926	95.7849
YFR052W::chr00_2:dn	188.078	258.619
YFR053C::chr00_2:dn	667.722	684.862
YFR054C::chr00_2:dn	937.69	1161.39
YFR055W::chr00_2:dn	761.311	785.437
YFR056C::chr00_2:dn	1452.43	1684.22
YFR057W::chr00_2:dn	844.101	920.334
YGL001C::chr7_1:dn	1150.97	1292.3
YGL002W::chr7_1:dn	1643.21	1249.2
YGL003C::chr7_1:dn	1871.78	1749.67
YGL004C::chr7_1:dn	14.3983	19.157
YGL006W::chr7_1:dn	83.6902	99.776
YGL007W::chr7_1:dn	329.361	370.368
YGL008C::chr7_1:dn	807.205	613.024
YGL009C::chr7_1:dn	1195.96	1004.15
YGL010W::chr7_1:dn	1060.08	1168.58
YGL011C::chr7_1:dn	1270.65	854.881
YGL013C::chr7_1:dn	1529.82	1629.14
YGL014W::chr7_1:dn	1457.83	1171.77
YGL015C::chr7_1:dn	1167.16	1325.82
YGL016W::chr7_1:dn	1287.75	858.872
YGL017W::chr7_1:dn	838.702	1346.58
YGL018C::chr7_1:dn	1159.96	759.894
YGL019W::chr7_1:dn	836.902	688.055
YGL020C::chr7_1:dn	1225.66	1127.87
YGL021W::chr7_1:dn	1007.88	879.625
YGL022W::chr7_1:dn	26.0969	43.1032
YGL023C::chr7_1:dn	972.786	893.993
YGL024W::chr7_1:dn	1124.87	1051.24
YGL025C::chr7_1:dn	2154.35	2248.55
YGL026C::chr7_1:dn	1057.38	717.589
YGL027C::chr7_1:dn	1020.48	961.042
YGL028C::chr7_1:dn	706.417	755.903
YGL029W::chr7_1:dn	1044.78	1364.14
YGL030W::chr7_1:dn	56.6934	93.3903
YGL031C::chr7_1:dn	749.612	780.647
YGL033W::chr7_1:dn	1311.15	1186.94
YGL034C::chr7_1:dn	12.5985	12.7713
YGL035C::chr7_1:dn	1257.15	1205.29
YGL036W::chr7_1:dn	1655.81	1681.03
YGL037C::chr7_1:dn	2267.73	1842.26
YGL038C::chr7_1:dn	981.785	1151.81
YGL039W::chr7_1:dn	1064.58	1058.42
YGL040C::chr7_1:dn	1249.05	1231.63
YGL041C::chr7_1:dn	1433.53	1146.23
YGL042C::chr7_1:dn	927.791	985.787
YGL043W::chr7_1:dn	1385.84	1071.19
YGL044C::chr7_1:dn	895.395	803.795
YGL045W::chr7_1:dn	773.909	834.127
YGL046W::chr7_1:dn	759.511	880.423
YGL047W::chr7_1:dn	1181.56	904.37
YGL048C::chr7_1:dn	1414.63	1219.66
YGL049C::chr7_1:dn	1524.42	1579.65
YGL050W::chr7_1:dn	21.5975	58.2692
YGL051W::chr7_1:dn	825.203	967.428
YGL053W::chr7_1:dn	761.311	435.821
YGL054C::chr7_1:dn	449.047	643.356
YGL055W::chr7_1:dn	427.45	557.947
YGL056C::chr7_1:dn	934.99	875.634
YGL057C::chr7_1:dn	932.291	775.858
YGL058W::chr7_1:dn	722.615	634.575
YGL059W::chr7_1:dn	1303.95	1139.04
YGL060W::chr7_1:dn	907.994	866.854
YGL061C::chr7_1:dn	1148.27	802.199
YGL062W::chr7_1:dn	1597.31	1621.16
YGL063W::chr7_1:dn	272.668	249.041
YGL064C::chr7_1:dn	1065.48	1517.39
YGL065C::chr7_1:dn	1165.36	1110.31
YGL066W::chr7_1:dn	1291.35	951.464
YGL067W::chr7_1:dn	1300.35	1285.11
YGL068W::chr7_1:dn	815.304	461.364
YGL069C::chr7_1:dn	1124.87	1013.72
YGL070C::chr7_1:dn	768.51	488.503
YGL071W::chr7_1:dn	348.259	332.054
YGL072C::chr7_1:dn	421.151	303.319
YGL073W::chr7_1:dn	1233.76	1850.25
YGL074C::chr7_1:dn	1908.68	1802.35
YGL075C::chr7_1:dn	1195.96	1188.53
YGL076C::chr7_1:dn	904.394	645.75
YGL077C::chr7_1:dn	1000.68	912.352
YGL078C::chr7_1:dn	970.986	1263.56
YGL079W::chr7_1:dn	9.89884	3.99104
YGL080W::chr7_1:dn	1249.95	1083.97
YGL081W::chr7_1:dn	882.797	1456.73
YGL082W::chr7_1:dn	1219.36	1260.37
YGL083W::chr7_1:dn	1496.52	1426.4
YGL084C::chr7_1:dn	1149.17	993.769
YGL085W::chr7_1:dn	1353.44	1435.18
YGL086W::chr7_1:dn	1589.21	1898.94
YGL087C::chr7_1:dn	29.6965	104.565
YGL088W::chr7_1:dn	1235.56	1282.72
YGL089C::chr7_1:dn	1184.26	870.047
YGL090W::chr7_1:dn	940.39	1036.87
YGL091C::chr7_1:dn	1435.33	1676.24
YGL092W::chr7_1:dn	1393.94	1483.87
YGL093W::chr7_1:dn	1587.41	1159
YGL094C::chr7_1:dn	1672	1958
YGL095C::chr7_1:dn	1570.32	1311.46
YGL096W::chr7_1:dn	948.489	1381.7
YGL097W::chr7_1/chr00_17a:dn	1473.13	1133.46
YGL098W::chr7_2:dn	710.917	907.562
YGL102C::chr7_2:dn	880.997	860.468
YGL103W::chr7_2:dn	1330.04	802.997
YGL105W::chr7_2:dn	1734.1	1389.68
YGL108C::chr7_2:dn	38.6955	39.1122
YGL109W::chr7_2:dn	1990.57	2151.97
YGL110C::chr7_2:dn	1020.48	793.419
YGL111W::chr7_2:dn	904.394	936.298
YGL112C::chr7_2:dn	1257.15	1048.85
YGL113W::chr7_2:dn	886.396	763.885
YGL114W::chr7_2:dn	550.735	555.553
YGL115W::chr7_2:dn	611.028	590.674
YGL116W::chr7_2:dn	611.028	759.894
YGL117W::chr7_2:dn	495.842	478.925
YGL118C::chr7_2:dn	497.642	515.642
YGL120C::chr7_2:dn	701.918	693.643
YGL121C::chr7_2:dn	826.103	1148.62
YGL122C::chr7_2:dn	511.14	565.929
YGL123W::chr7_2:dn	665.922	367.176
YGL124C::chr7_2:dn	515.64	695.239
YGL125W::chr7_2:dn	365.357	379.947
YGL126W::chr7_2:dn	676.721	770.271
YGL127C::chr7_2:dn	786.508	961.042
YGL128C::chr7_2:dn	354.558	449.391
YGL129C::chr7_2:dn	1932.07	1377.71
YGL130W::chr7_2:dn	885.496	876.432
YGL131C::chr7_2:dn	270.868	496.485
YGL132W::chr7_2:dn	496.742	613.024
YGL133W::chr7_2:dn	866.598	821.356
YGL135W::chr7_2:dn	134.084	189.175
YGL136C::chr7_2:dn	20.6976	12.7713
YGL137W::chr7_2:dn	614.628	504.467
YGL138C::chr7_2:dn	396.854	443.005
YGL139W::chr7_2:dn	444.548	361.588
YGL140C::chr7_2:dn	476.944	463.759
YGL141W::chr7_2:dn	111.587	166.825
YGL142C::chr7_2:dn	86.3899	94.1885
YGL143C::chr7_2:dn	76.491	76.628
YGL144C::chr7_2:dn	28.7966	27.1391
YGL146C::chr7_2:dn	140.384	242.655
YGL147C::chr7_2:dn	6.29926	41.5068
YGL148W::chr7_2:dn	131.385	186.781
YGL149W::chr7_2:dn	13.4984	31.9283
YGL150C::chr7_2:dn	15.2982	43.1032
YGL151W::chr7_2:dn	20.6976	41.5068
YGL152C::chr7_2:dn	6.29926	11.1749
YGL153W::chr7_2:dn	107.987	132.503
YGL154C::chr7_2:dn	12.5985	20.7534
YGL155W::chr7_2:dn	97.1886	102.969
YGL156W::chr7_2:dn	9.89884	13.5695
YGL157W::chr7_2:dn	17.9979	32.7265
YGL158W::chr7_2:dn	33.2961	37.5158
YGL159W::chr7_2:dn	24.2972	31.9283
YGL160W::chr7_2:dn	33.2961	31.1301
YGL162W::chr7_2:dn	4.49947	7.98208
YGL163C::chr7_2:dn	10.7987	20.7534
YGL165C::chr7_2:dn	47.6944	59.0674
YGL166W::chr7_2:dn	16.1981	15.9642
YGL167C::chr7_2:dn	25.197	36.7176
YGL168W::chr7_2:dn	8.09905	16.7624
YGL169W::chr7_2:dn	131.385	146.072
YGL170C::chr7_2:dn	47.6944	86.2064
YGL171W::chr7_2:dn	51.294	73.4351
YGL172W::chr7_2:dn	184.478	162.036
YGL173C::chr7_2:dn	13.4984	6.38566
YGL175C::chr7_2:dn	4.49947	13.5695
YGL176C::chr7_2:dn	7.19916	10.3767
YGL177W::chr7_2:dn	10.7987	14.3677
YGL181W::chr7_2:dn	10.7987	17.5606
YGL194C::chr7_3:dn	50.3941	58.2692
YGL195W::chr7_3:dn	0.899895	3.19283
YGL197W::chr7_3:dn	50.3941	102.171
YGL198W::chr7_3:dn	51.294	71.8387
YGL199C::chr7_3/chr00_12:dn	8.99895	14.3677
YGL201C::chr7_3:dn	40.4953	54.2781
YGL202W::chr7_3:dn	26.9968	33.5247
YGL203C::chr7_3:dn	13.4984	18.3588
YGL205W::chr7_3:dn	9.89884	19.157
YGL206C::chr7_3:dn	44.0948	106.162
YGL207W::chr7_3:dn	117.886	157.247
YGL209W::chr7_3:dn	23.3973	16.7624
YGL212W::chr7_3:dn	8.99895	10.3767
YGL213C::chr7_3:dn	7.19916	16.7624
YGL214W::chr7_3/chr00_12:dn	11.6986	35.9194
YGL216W::chr7_3:dn	7.19916	12.7713
YGL217C::chr7_3/chr00_12:dn	34.196	44.6996
YGL218W::chr7_3/chr00_12:dn	12.5985	26.3409
YGL219C::chr00_14:dn	8.99895	16.7624
YGL221C::chr7_3:dn	3.59958	13.5695
YGL222C::chr7_3:dn	75.5911	173.211
YGL225W::chr7_3:dn	79.1907	96.5832
YGL226C-A::chr7_3:dn	110.687	121.328
YGL228W::chr7_3:dn	6.29926	14.3677
YGL229C::chr7_3:dn	20.6976	29.5337
YGL230C::chr7_3:dn	8.09905	18.3588
YGL231C::chr7_3:dn	69.2919	147.668
YGL233W::chr7_3:dn	14.3983	17.5606
YGL234W::chr7_3:dn	23.3973	23.9462
YGL235W::chr7_3/chr00_12:dn	17.9979	27.1391
YGL236C::chr7_3:dn	3.59958	10.3767
YGL237C::chr7_3:dn	61.1928	90.1975
YGL239C::chr7_3/chr00_12:dn	10.7987	15.9642
YGL240W::chr7_3:dn	5.39937	13.5695
YGL243W::chr7_3:dn	16.1981	13.5695
YGL245W::chr7_3:dn	33.2961	33.5247
YGL246C::chr7_3:dn	15.2982	27.9373
YGL249W::chr7_3:dn	14.3983	15.9642
YGL250W::chr7_3:dn	38.6955	57.471
YGL252C::chr7_3:dn	2.69968	0.798208
YGL253W::chr7_3:dn	56.6934	96.5832
YGL254W::chr7_3:dn	102.588	122.924
YGL255W::chr7_3:dn	48.5943	86.2064
YGL256W::chr7_3:dn	8.99895	20.7534
YGL257C::chr7_3:dn	15.2982	25.5427
YGL258W::chr7_3:dn	16.1981	25.5427
YGL259W::chr7_3:dn	71.9916	96.5832
YGL260W::chr7_3:dn	10.7987	20.7534
YGL261C::chr7_3:dn	6.29926	14.3677
YGL262W::chr7_3:dn	8.99895	25.5427
YGL263W::chr7_3:dn	7.19916	21.5516
YGR001C::chr7_3:dn	70.1918	78.2244
YGR003W::chr7_3:dn	24.2972	43.9014
YGR004W::chr7_3:dn	2.69968	9.57849
YGR006W::chr7_3:dn	5.39937	16.7624
YGR007W::chr7_3:dn	1438.03	1112.7
YGR008C::chr7_3:dn	186.278	4.78925
YGR009C::chr7_3:dn	751.412	920.334
YGR010W::chr7_3:dn	597.53	581.095
YGR011W::chr7_3/chr00_12:dn	1493.83	1372.12
YGR012W::chr7_3:dn	42.295	27.9373
YGR013W::chr7_3:dn	991.684	913.15
YGR014W::chr7_3:dn	1456.93	1230.84
YGR015C::chr7_3:dn	17.9979	18.3588
YGR016W::chr7_3:dn	827.003	1098.33
YGR017W::chr7_3:dn	415.751	518.037
YGR018C::chr7_3/chr00_12:dn	1461.43	1608.39
YGR019W::chr7_3:dn	1056.48	1130.26
YGR021W::chr7_3:dn	355.458	506.862
YGR022C::chr7_3/chr00_12:dn	2688.89	1885.37
YGR023W::chr7_3:dn	1132.07	1313.85
YGR025W::chr7_3/chr00_12:dn	2921.06	2698.74
YGR026W::chr7_3:dn	1278.75	1238.82
YGR027C::chr7_4:dn	10.7987	16.7624
YGR029W::chr7_4:dn	8.99895	21.5516
YGR030C::chr7_4:dn	24.2972	39.1122
YGR032W::chr00_14:dn	4.49947	12.7713
YGR034W::chr7_4:dn	9.89884	10.3767
YGR035C::chr7_4:dn	1.79979	13.5695
YGR037C::chr7_4:dn	42.295	87.0047
YGR039W::chr7_4:dn	11.6986	27.1391
YGR040W::chr00_14:dn	6.29926	12.7713
YGR041W::chr7_4:dn	49.4942	74.2333
YGR042W::chr7_4:dn	20.6976	29.5337
YGR044C::chr7_4:dn	809.905	1077.58
YGR045C::chr7_4:dn	735.214	921.132
YGR046W::chr00_14:dn	511.14	771.867
YGR048W::chr00_14:dn	893.595	399.104
YGR049W::chr7_4:dn	6.29926	8.78029
YGR050C::chr00_14:dn	10.7987	18.3588
YGR051C::chr7_4:dn	102.588	170.018
YGR052W::chr7_4:dn	85.49	133.301
YGR053C::chr00_14:dn	28.7966	44.6996
YGR054W::chr7_4:dn	7.19916	11.1749
YGR055W::chr7_4:dn	1296.75	766.28
YGR056W::chr7_4:dn	719.016	612.225
YGR057C::chr7_4:dn	864.799	782.244
YGR058W::chr7_4:dn	969.186	1064.01
YGR059W::chr7_4:dn	619.127	657.723
YGR060W::chr7_4:dn	85.49	174.808
YGR061C::chr7_4:dn	1061.88	1162.99
YGR063C::chr00_14:dn	849.5	719.983
YGR065C::chr7_4:dn	845.001	664.109
YGR066C::chr7_4:dn	4.49947	11.9731
YGR067C::chr7_4:dn	20.6976	45.4978
YGR068C::chr7_4:dn	5.39937	3.99104
YGR069W::chr7_4:dn	6.29926	268.996
YGR071C::chr7_4:dn	236.672	5.58746
YGR072W::chr7_4:dn	1227.46	1033.68
YGR073C::chr7_4:dn	20.6976	3.99104
YGR074W::chr7_4:dn	38.6955	67.8477
YGR075C::chr7_4:dn	18.8978	44.6996
YGR076C::chr7_4:dn	78.2908	163.633
YGR077C::chr7_4:dn	1716.1	1807.14
YGR078C::chr7_4:dn	104.388	162.036
YGR080W::chr7_4:dn	252.87	290.548
YGR081C::chr7_4:dn	1097.87	1083.97
YGR082W::chr00_14:dn	887.296	1044.06
YGR083C::chr7_4:dn	92.6891	98.1796
YGR084C::chr7_4:dn	792.807	846.1
YGR085C::chr7_4:dn	26.9968	62.2602
YGR087C::chr7_4:dn	14.3983	18.3588
YGR088W::chr7_4:dn	1115.87	1396.86
YGR089W::chr00_14:dn	826.103	795.015
YGR091W::chr7_4:dn	984.485	1014.52
YGR092W::chr00_14:dn	548.936	667.302
YGR093W::chr00_14:dn	99.8883	145.274
YGR094W::chr7_4:dn	922.392	955.455
YGR095C::chr7_4:dn	105.288	126.117
YGR096W::chr7_4:dn	132.285	191.57
YGR097W::chr7_4:dn	53.9937	32.7265
YGR098C::chr7_4:dn	551.635	535.597
YGR099W::chr7_4:dn	22.4974	49.4889
YGR100W::chr7_4:dn	1069.07	1430.39
YGR101W::chr7_4:dn	1348.94	996.962
YGR102C::chr7_4:dn	98.0885	138.09
YGR103W::chr7_4:dn	873.798	1142.24
YGR104C::chr7_4:dn	880.997	1348.97
YGR105W::chr7_4:dn	807.205	814.172
YGR106C::chr00_14:dn	878.297	1001.75
YGR108W::chr7_4:dn	947.589	861.266
YGR109C::chr7_4:dn	720.816	676.082
YGR111W::chr7_4:dn	116.086	162.834
YGR112W::chr7_4:dn	12.5985	22.3498
YGR113W::chr7_4:dn	1455.13	1250.79
YGR114C::chr7_4:dn	1310.25	1100.73
YGR116W::chr00_14:dn	560.634	224.296
YGR118W::chr7_4:dn	118.786	126.915
YGR119C::chr7_4:dn	1315.65	1257.18
YGR120C::chr7_4:dn	1050.18	1496.64
YGR121C::chr7_4:dn	1604.51	1468.7
YGR122C-A::chr00_17a:dn	8.99895	33.5247
YGR122W::chr7_4:dn	34.196	46.2961
YGR124W::chr7_5:dn	1312.05	1453.54
YGR125W::chr7_5:dn	276.268	279.373
YGR126W::chr7_5:dn	789.208	878.827
YGR127W::chr7_5:dn	187.178	299.328
YGR128C::chr7_5:dn	842.301	658.521
YGR129W::chr7_5:dn	765.81	1043.26
YGR130C::chr7_5:dn	37.7956	72.6369
YGR131W::chr7_5:dn	633.526	786.235
YGR132C::chr7_5:dn	648.824	596.261
YGR134W::chr00_8:dn	623.627	1020.11
YGR135W::chr7_5:dn	779.309	664.109
YGR136W::chr7_5:dn	917.892	1139.84
YGR137W::chr7_5:dn	879.197	926.719
YGR138C::chr7_5:dn	916.093	747.921
YGR139W::chr7_5:dn	20.6976	25.5427
YGR140W::chr7_5:dn	31.4963	43.1032
YGR141W::chr7_5:dn	94.4889	107.758
YGR142W::chr7_5:dn	1017.78	933.903
YGR143W::chr7_5:dn	105.288	90.9957
YGR144W::chr7_5:dn	169.18	215.516
YGR145W::chr00_15:dn	1167.16	826.145
YGR146C::chr7_5:dn	4.49947	3.19283
YGR147C::chr7_5:dn	145.783	211.525
YGR148C::chr7_5:dn	817.104	638.566
YGR149W::chr7_5:dn	8.09905	19.157
YGR150C::chr7_5:dn	995.283	1046.45
YGR151C::chr7_5:dn	19.7977	12.7713
YGR153W::chr7_5:dn	858.499	779.051
YGR154C::chr7_5:dn	661.423	832.531
YGR155W::chr00_11:dn	715.416	750.315
YGR155W::chr7_5:dn	944.889	893.195
YGR156W::chr7_5:dn	1246.35	1257.98
YGR158C::chr7_5:dn	32.3962	27.9373
YGR159C::chr7_5:dn	1357.94	1380.1
YGR160W::chr7_5:dn	1420.03	1155.8
YGR161C::chr7_5:dn	1254.45	879.625
YGR162W::chr00_17a:dn	1497.42	1744.88
YGR163W::chr7_5:dn	911.593	743.132
YGR164W::chr7_5:dn	899.895	972.217
YGR165W::chr7_5:dn	995.283	1107.11
YGR166W::chr7_5:dn	6.29926	27.9373
YGR167W::chr7_5:dn	1163.56	1168.58
YGR168C::chr7_5:dn	1102.37	1241.21
YGR169C::chr7_5:dn	1266.15	1230.04
YGR170W::chr7_5:dn	1052.88	992.971
YGR171C::chr7_5:dn	333.861	426.243
YGR172C::chr7_5:dn	402.253	421.454
YGR173W::chr7_5:dn	864.799	1013.72
YGR174C::chr7_5:dn	23.3973	40.7086
YGR175C::chr7_5:dn	982.685	611.427
YGR176W::chr7_5:dn	1348.94	1379.3
YGR177C::chr7_5:dn	11.6986	17.5606
YGR179C::chr7_5:dn	5.39937	11.1749
YGR180C::chr7_5:dn	1153.66	954.657
YGR181W::chr7_5:dn	1207.66	1256.38
YGR182C::chr7_5:dn	1083.47	1127.87
YGR183C::chr7_5:dn	519.239	1621.16
YGR184C::chr7_5:dn	950.289	1242.81
YGR185C::chr7_5:dn	1159.06	1504.62
YGR187C::chr7_5:dn	873.798	1230.84
YGR188C::chr00_10:dn	741.513	465.355
YGR189C::chr7_5:dn	1103.27	1038.47
YGR190C::chr7_5:dn	1085.27	661.714
YGR191W::chr7_5:dn	906.194	634.575
YGR192C::chr7_5:dn	53.9937	69.4441
YGR193C::chr7_5:dn	8.99895	27.1391
YGR194C::chr7_5:dn	1556.82	1173.37
YGR195W::chr7_5:dn	970.086	1149.42
YGR196C::chr7_5:dn	1186.96	1099.13
YGR197C::chr7_5:dn	45.8946	71.8387
YGR198W::chr7_5:dn	1019.58	1068.8
YGR199W::chr7_5:dn	141.283	146.072
YGR201C::chr00_10:dn	1110.47	1059.22
YGR202C::chr7_5:dn	1117.67	725.571
YGR203W::chr7_5:dn	1096.07	822.154
YGR204W::chr00_10:dn	1049.28	823.751
YGR205W::chr7_5:dn	129.585	241.857
YGR206W::chr7_5:dn	283.467	48.6907
YGR207C::chr7_5:dn	1791.69	1808.74
YGR208W::chr7_5:dn	325.762	2.39462
YGR209C::chr7_5:dn	488.643	467.75
YGR210C::chr00_8:dn	4.49947	8.78029
YGR211W::chr7_5:dn	1592.81	1454.33
YGR212W::chr7_5:dn	1609.01	1199.71
YGR213C::chr7_5:dn	1755.69	2039.42
YGR214W::chr7_5:dn	1489.33	1475.89
YGR215W::chr7_5:dn	22.4974	23.148
YGR216C::chr7_5:dn	15.2982	30.3319
YGR217W::chr7_5:dn	998.883	1357.75
YGR218W::chr7_5:dn	277.168	229.086
YGR219W::chr00_2:dn	670.421	767.078
YGR220C::chr00_2:dn	341.96	388.727
YGR221C::chr00_2:dn	6.29926	11.1749
YGR222W::chr00_2:dn	972.786	789.428
YGR223C::chr00_2:dn	337.46	356.799
YGR227W::chr00_2:dn	855.8	1028.09
YGR228W::chr00_2:dn	35.0959	55.8746
YGR229C::chr00_2:dn	59.393	104.565
YGR231C::chr00_2:dn	33.2961	33.5247
YGR232W::chr00_2:dn	1119.47	899.58
YGR233C::chr00_2:dn	51.294	84.61
YGR234W::chr00_2:dn	3.59958	20.7534
YGR235C::chr00_2:dn	36.8957	61.462
YGR236C::chr00_2:dn	505.741	398.306
YGR237C::chr00_2:dn	1274.25	1002.55
YGR238C::chr00_14:dn	87.2898	140.485
YGR239C::chr00_14:dn	1011.48	1246.8
YGR241C::chr00_2:dn	18.8978	39.1122
YGR242W::chr00_2:dn	16.1981	10.3767
YGR243W::chr00_2:dn	17.9979	31.9283
YGR245C::chr00_2:dn	34.196	41.5068
YGR246C::chr00_2:dn	1870.88	1683.42
YGR247W::chr00_2:dn	11.6986	27.9373
YGR249W::chr00_2:dn	33.2961	65.453
YGR250C::chr00_14:dn	23.3973	43.9014
YGR251W::chr00_2:dn	138.584	249.839
YGR252W::chr00_17a:dn	11.6986	9.57849
YGR253C::chr00_3:dn	25.197	37.5158
YGR254W::chr00_17a:dn	395.954	408.682
YGR255C::chr00_17a:dn	11.6986	13.5695
YGR256W::chr00_3:dn	106.188	151.659
YGR258C::chr00_17a:dn	773.909	1008.14
YGR259C::chr00_3:dn	11.6986	23.148
YGR260W::chr00_3:dn	1525.32	1424
YGR261C::chr00_3:dn	1574.82	1496.64
YGR262C::chr00_3:dn	1386.74	1159
YGR264C::chr00_3:dn	2481.91	1981.95
YGR265W::chr00_3:dn	8.99895	30.3319
YGR266W::chr00_3:dn	8.09905	13.5695
YGR267C::chr00_3:dn	3.59958	31.1301
YGR269W::chr00_3:dn	37.7956	40.7086
YGR270W::chr00_3:dn	961.087	792.62
YGR271W::chr00_17a:dn	1058.28	1448.75
YGR272C::chr00_17a:dn	6.29926	15.9642
YGR273C::chr00_17a:dn	15.2982	12.7713
YGR275W::chr00_3:dn	8.09905	11.1749
YGR278W::chr00_3:dn	740.613	907.562
YGR279C::chr00_3:dn	616.428	718.387
YGR281W::chr00_3:dn	134.984	139.686
YGR283C::chr00_3:dn	0.899895	11.1749
YGR284C::chr00_3:dn	1155.46	925.921
YGR285C::chr00_3:dn	8.99895	8.78029
YGR287C::chr00_3:dn	741.513	522.028
YGR288W::chr00_3:dn	17.9979	37.5158
YGR289C::chr00_17a:dn	679.42	986.585
YGR290W::chr00_3:dn	14.3983	19.9552
YGR291C::chr00_17a:dn	8.99895	15.9642
YGR292W::chr00_17a:dn	976.386	1097.54
YGR295C::chr00_17b:dn	73.7914	69.4441
YHL002W::chr00_10:dn	2.69968	10.3767
YHL003C::chr8_1:dn	17.9979	34.3229
YHL005C::chr8_1:dn	5.39937	17.5606
YHL006C::chr8_1:dn	79.1907	185.184
YHL007C::chr8_1:dn	8.09905	21.5516
YHL008C::chr8_1:dn	1426.33	1540.54
[truncated: 2,983 more rows]

## Sheet: flight
Strain tag	14 generations	21 generations
YAL001C::chr1_1:up	319.396	407.785
YAL003W::chr1_1:up	499.925	395.428
YAL005C::chr1_1:up	236.076	259.499
YAL007C::chr1_1:up	999.85	729.07
YAL008W::chr1_1:up	374.944	247.142
YAL009W::chr1_1:up	569.359	518.999
YAL010C::chr1_1:up	555.472	407.785
YAL011W::chr1_1:up	388.83	271.856
YAL012W::chr00_12:up	138.868	135.928
YAL013W::chr1_1:up	722.114	889.712
YAL014C::chr1_1:up	902.642	667.284
YAL015C::chr1_1:up	597.132	815.569
YAL017W::chr1_1:up	777.661	580.784
YAL018C::chr1_1:up	263.849	444.856
YAL019W::chr1_1:up	458.264	247.142
YAL020C::chr1_1:up	222.189	333.642
YAL021C::chr1_1:up	208.302	296.571
YAL022C::chr1_1:up	291.623	197.714
YAL023C::chr1_1:up	361.057	370.713
YAL024C::chr00_17a:up	722.114	518.999
YAL025C::chr1_1:up	249.962	173
YAL026C::chr1_1:up	222.189	259.499
YAL027W::chr1_1:up	555.472	951.498
YAL028W::chr1_1:up	555.472	568.427
YAL029C::chr1_1:up	680.453	481.927
YAL030W::chr1_1:up	416.604	383.07
YAL031C::chr1_1:up	666.566	605.498
YAL032C::chr1_1:up	236.076	284.214
YAL033W::chr1_1:up	541.585	679.641
YAL034C::chr1_1:up	388.83	271.856
YAL034W-A::chr1_1:up	263.849	679.641
YAL035C-A::chr1_1:up	194.415	173
YAL035W::chr1_1:up	152.755	234.785
YAL036C::chr1_1:up	611.019	877.355
YAL037W::chr1_1:up	319.396	173
YAL038W::chr1_1:up	152.755	148.285
YAL039C::chr1_1:up	319.396	210.071
YAL040C::chr1_1:up	458.264	296.571
YAL041W::chr1_1:up	124.981	197.714
YAL042W::chr1_1:up	291.623	247.142
YAL045C::chr1_1:up	291.623	345.999
YAL046C::chr1_1:up	361.057	469.57
YAL048C::chr1_1:up	180.528	148.285
YAL049C::chr1_1:up	708.227	753.784
YAL051W::chr1_1:up	569.359	667.284
YAL053W::chr1_1:up	152.755	111.214
YAL054C::chr00_12:up	416.604	395.428
YAL055W::chr1_1:up	458.264	345.999
YAL056W::chr1_1:up	249.962	234.785
YAL058C-A::chr00_12:up	819.321	840.284
YAL058W::chr1_1:up	722.114	667.284
YAL059W::chr1_1:up	236.076	173
YAL060W::chr1_1:up	541.585	543.713
YAL061W::chr1_1:up	444.378	506.642
YAL062W::chr1_1:up	708.227	667.284
YAL064C-A::chr00_1:up	444.378	531.356
YAL065C::chr1_1:up	152.755	222.428
YAL066W::chr1_1:up	249.962	296.571
YAL067C::chr1_1:up	361.057	296.571
YAL068C::chr1_1:up	333.283	259.499
YAR002C-A::chr00_16a:up	513.812	939.14
YAR003W::chr1_1:up	1097.06	1223.35
YAR007C::chr1_1:up	611.019	605.498
YAR008W::chr1_1:up	291.623	271.856
YAR014C::chr1_1:up	388.83	543.713
YAR015W::chr1_1:up	249.962	173
YAR019C::chr1_1:up	680.453	729.07
YAR020C::chr1_1:up	222.189	123.571
YAR023C::chr1_1:up	305.51	481.927
YAR027W::chr1_1:up	180.528	407.785
YAR028W::chr1_1:up	972.076	630.213
YAR029W::chr1_1:up	1208.15	1346.93
YAR030C::chr1_1:up	1013.74	1025.64
YAR031W::chr1_1:up	444.378	395.428
YAR035W::chr1_1:up	999.85	654.927
YAR037W::chr1_1:up	555.472	630.213
YAR040C::chr1_1:up	805.434	716.712
YAR042W::chr1_1:up	499.925	333.642
YAR043C::chr1_1:up	124.981	296.571
YAR047C::chr1_1:up	347.17	494.284
YAR050W::chr00_12:up	208.302	197.714
YBL004W::chr2_1:up	249.962	111.214
YBL007C::chr2_1:up	361.057	383.07
YBL008W::chr2_1:up	444.378	457.213
YBL009W::chr2_1:up	277.736	247.142
YBL012C::chr2_1:up	291.623	395.428
YBL013W::chr2_1:up	444.378	296.571
YBL015W::chr2_1:up	374.944	444.856
YBL016W::chr2_1:up	208.302	160.642
YBL018C::chr2_1:up	291.623	247.142
YBL020W::chr2_1:up	124.981	173
YBL024W::chr2_1:up	291.623	383.07
YBL025W::chr2_1:up	152.755	74.1427
YBL026W::chr2_1:up	236.076	185.357
YBL028C::chr2_1:up	374.944	420.142
YBL029W::chr2_1:up	361.057	185.357
YBL031W::chr2_1:up	319.396	173
YBL033C::chr2_1:up	263.849	185.357
YBL034C::chr2_1:up	513.812	197.714
YBL035C::chr2_1:up	263.849	160.642
YBL036C::chr2_1:up	361.057	197.714
YBL037W::chr2_1:up	291.623	234.785
YBL038W::chr2_1:up	166.642	111.214
YBL039C::chr2_1:up	83.3208	160.642
YBL040C::chr2_1:up	222.189	123.571
YBL041W::chr2_1:up	222.189	123.571
YBL042C::chr2_1:up	166.642	74.1427
YBL048W::chr2_1:up	291.623	135.928
YBL050W::chr2_1:up	569.359	852.641
YBL051C::chr2_1:up	236.076	111.214
YBL053W::chr2_1:up	138.868	135.928
YBL054W::chr2_1:up	416.604	457.213
YBL055C::chr2_1:up	97.2076	135.928
YBL056W::chr2_1:up	208.302	185.357
YBL057C::chr2_1:up	236.076	173
YBL059W::chr2_1:up	319.396	247.142
YBL060W::chr2_1:up	152.755	123.571
YBL061C::chr2_1:up	597.132	753.784
YBL062W::chr2_1:up	277.736	111.214
YBL063W::chr2_1:up	458.264	222.428
YBL064C::chr2_1:up	180.528	148.285
YBL066C::chr2_1:up	152.755	185.357
YBL068W::chr2_1:up	236.076	135.928
YBL070C::chr2_1:up	249.962	185.357
YBL071C::chr2_1:up	416.604	296.571
YBL072C::chr2_1:up	305.51	173
YBL074C::chr2_1:up	527.698	556.07
YBL077W::chr2_1:up	263.849	123.571
YBL078C::chr2_1:up	277.736	197.714
YBL079W::chr2_1:up	444.378	296.571
YBL081W::chr2_1:up	180.528	61.7856
YBL082C::chr2_1:up	652.68	444.856
YBL083C::chr2_1:up	305.51	185.357
YBL084C::chr2_1:up	319.396	296.571
YBL085W::chr2_1:up	249.962	123.571
YBL086C::chr2_1:up	138.868	185.357
YBL087C::chr2_1:up	597.132	481.927
YBL088C::chr2_1:up	583.246	383.07
YBL089W::chr2_1:up	597.132	741.427
YBL090W::chr2_1:up	152.755	49.4284
YBL091C-A::chr00_1:up	499.925	580.784
YBL091C::chr2_1:up	194.415	148.285
YBL092W::chr2_1:up	305.51	271.856
YBL094C::chr2_1:up	444.378	395.428
YBL096C::chr2_2:up	291.623	222.428
YBL097W::chr2_2:up	791.548	951.498
YBL098W::chr2_2:up	958.189	593.141
YBL099W::chr2_2:up	458.264	358.356
YBL100C::chr2_2:up	888.755	976.212
YBL101C::chr2_2:up	694.34	531.356
YBL102W::chr2_2:up	430.491	284.214
YBL103C::chr2_2:up	749.887	568.427
YBL104C::chr2_2:up	1444.23	1025.64
YBL105C::chr2_2:up	527.698	383.07
YBL106C::chr2_2:up	208.302	148.285
YBL107C::chr2_2:up	166.642	74.1427
YBR001C::chr2_2:up	291.623	284.214
YBR002C::chr2_2:up	305.51	173
YBR003W::chr2_2:up	249.962	420.142
YBR005W::chr2_2:up	388.83	185.357
YBR007C::chr2_2:up	236.076	358.356
YBR008C::chr2_2:up	277.736	222.428
YBR009C::chr2_2:up	472.151	259.499
YBR010W::chr2_2:up	874.868	667.284
YBR011C::chr2_2:up	583.246	432.499
YBR012C::chr2_2:up	388.83	457.213
YBR013C::chr2_2:up	208.302	135.928
YBR015C::chr2_2:up	124.981	160.642
YBR017C::chr2_2:up	319.396	210.071
YBR018C::chr2_2:up	319.396	308.928
YBR019C::chr2_2:up	263.849	185.357
YBR020W::chr00_18:up	1027.62	902.069
YBR021W::chr2_2:up	194.415	61.7856
YBR022W::chr2_2:up	486.038	247.142
YBR023C::chr2_2:up	333.283	308.928
YBR024W::chr2_2:up	27.7736	259.499
YBR025C::chr2_2:up	222.189	135.928
YBR028C::chr2_2:up	388.83	271.856
YBR030W::chr2_2:up	236.076	135.928
YBR031W::chr2_2:up	166.642	160.642
YBR032W::chr2_2:up	291.623	197.714
YBR033W::chr2_2:up	27.7736	494.284
YBR035C::chr2_2:up	152.755	98.8569
YBR036C::chr2_2:up	347.17	333.642
YBR039W::chr2_2:up	249.962	111.214
YBR040W::chr2_2:up	388.83	407.785
YBR042C::chr2_2:up	430.491	506.642
YBR043C::chr2_2:up	430.491	271.856
YBR044C::chr2_2:up	208.302	111.214
YBR045C::chr2_2:up	402.717	407.785
YBR046C::chr2_2:up	541.585	481.927
YBR047W::chr2_2:up	180.528	234.785
YBR048W::chr2_2:up	166.642	49.4284
YBR049C::chr2_2:up	263.849	197.714
YBR050C::chr2_2:up	222.189	123.571
YBR051W::chr2_2:up	194.415	160.642
YBR053C::chr2_2:up	97.2076	160.642
YBR054W::chr2_2:up	208.302	185.357
YBR055C::chr2_2:up	611.019	506.642
YBR056W::chr2_2:up	666.566	531.356
YBR057C::chr2_2:up	402.717	173
YBR058C::chr2_2:up	249.962	197.714
YBR059C::chr2_2:up	527.698	432.499
YBR061C::chr2_2:up	416.604	345.999
YBR062C::chr2_2:up	374.944	160.642
YBR063C::chr2_2:up	513.812	333.642
YBR064W::chr2_2:up	249.962	210.071
YBR065C::chr2_2:up	277.736	370.713
YBR066C::chr2_2:up	388.83	407.785
YBR067C::chr2_2:up	319.396	160.642
YBR068C::chr2_2:up	388.83	333.642
YBR069C::chr2_2:up	249.962	160.642
YBR070C::chr2_2:up	152.755	160.642
YBR072W::chr2_2:up	263.849	185.357
YBR073W::chr2_2:up	222.189	197.714
YBR075W::chr2_2:up	194.415	148.285
YBR076W::chr2_2:up	208.302	123.571
YBR077C::chr2_2:up	458.264	296.571
YBR078W::chr2_2:up	319.396	234.785
YBR079C::chr2_2:up	569.359	580.784
YBR080C::chr00_16a:up	374.944	247.142
YBR081C::chr2_3:up	874.868	753.784
YBR082C::chr2_3:up	624.906	642.57
YBR083W::chr00_16a:up	541.585	630.213
YBR084C-A::chr00_16a:up	194.415	222.428
YBR084W::chr2_3:up	999.85	877.355
YBR085W::chr2_3:up	1097.06	840.284
YBR086C::chr2_3:up	1485.89	1013.28
YBR087W::chr2_3/chr00_16a:up	958.189	815.569
YBR088C::chr00_16a:up	444.378	271.856
YBR089W::chr2_3:up	791.548	296.571
YBR090C-A::chr2_3:up	763.774	506.642
YBR090C::chr00_16a:up	499.925	308.928
YBR091C::chr2_3:up	277.736	135.928
YBR092C::chr2_3:up	180.528	185.357
YBR093C::chr2_3:up	333.283	247.142
YBR094W::chr2_3:up	833.208	766.141
YBR096W::chr2_3:up	249.962	222.428
YBR098W::chr2_3:up	305.51	185.357
YBR100W::chr2_3/chr00_16a:up	666.566	543.713
YBR103W::chr2_3:up	291.623	160.642
YBR104W::chr2_3:up	624.906	494.284
YBR106W::chr2_3:up	416.604	308.928
YBR107C::chr2_3:up	361.057	420.142
YBR109C::chr2_3:up	152.755	135.928
YBR111C::chr2_3:up	597.132	457.213
YBR112C::chr00_16a:up	1472	1495.21
YBR113W::chr2_3:up	138.868	173
YBR116C::chr2_3:up	97.2076	197.714
YBR117C::chr2_3:up	277.736	197.714
YBR119W::chr2_3:up	583.246	383.07
YBR120C::chr2_3:up	277.736	210.071
YBR121C::chr00_16a:up	666.566	766.141
YBR123C::chr2_3:up	430.491	259.499
YBR124W::chr2_3:up	430.491	432.499
YBR125C::chr00_16a:up	722.114	790.855
YBR129C::chr2_3:up	291.623	173
YBR130C::chr2_3:up	333.283	284.214
YBR131W::chr00_16a:up	1360.91	1136.85
YBR132C::chr2_3:up	555.472	481.927
YBR134W::chr2_3:up	208.302	345.999
YBR136W::chr2_3:up	138.868	160.642
YBR137W::chr2_3:up	347.17	358.356
YBR138C::chr2_3:up	569.359	345.999
YBR139W::chr2_3:up	527.698	803.212
YBR140C::chr2_3:up	374.944	345.999
YBR141C::chr2_3:up	527.698	716.712
YBR142W::chr2_3:up	124.981	185.357
YBR144C::chr2_3:up	430.491	197.714
YBR145W::chr2_3:up	291.623	420.142
YBR146W::chr2_3:up	777.661	580.784
YBR147W::chr2_3:up	666.566	407.785
YBR148W::chr2_3:up	152.755	123.571
YBR149W::chr2_3:up	152.755	148.285
YBR150C::chr00_16a:up	69.434	1767.07
YBR151W::chr2_3:up	277.736	271.856
YBR152W::chr2_3:up	444.378	358.356
YBR153W::chr2_3:up	388.83	308.928
YBR158W::chr2_3:up	694.34	593.141
YBR161W::chr2_3:up	527.698	642.57
YBR162W-A::chr2_3:up	180.528	234.785
YBR163W::chr2_3:up	777.661	766.141
YBR164C::chr2_3:up	652.68	432.499
YBR165W::chr2_3:up	138.868	247.142
YBR166C::chr2_3:up	499.925	457.213
YBR167C::chr2_3:up	458.264	383.07
YBR168W::chr00_16a:up	333.283	407.785
YBR169C::chr00_16a:up	388.83	247.142
YBR170C::chr2_3:up	583.246	481.927
YBR171W::chr2_3:up	249.962	148.285
YBR172C::chr2_3:up	458.264	234.785
YBR173C::chr2_4:up	666.566	667.284
YBR174C::chr2_4:up	611.019	506.642
YBR175W::chr2_4:up	555.472	469.57
YBR176W::chr2_4:up	194.415	74.1427
YBR177C::chr2_4:up	222.189	86.4998
YBR178W::chr2_4:up	527.698	444.856
YBR179C::chr2_4:up	388.83	284.214
YBR180W::chr2_4:up	347.17	370.713
YBR181C::chr2_4:up	152.755	247.142
YBR182C::chr2_4:up	486.038	494.284
YBR183W::chr2_4:up	166.642	98.8569
YBR184W::chr2_4:up	694.34	840.284
YBR185C::chr2_4:up	374.944	123.571
YBR186W::chr2_4:up	222.189	135.928
YBR188C::chr2_4:up	597.132	358.356
YBR189W::chr00_14:up	722.114	308.928
YBR193C::chr2_4:up	458.264	333.642
YBR194W::chr2_4:up	402.717	135.928
YBR195C::chr2_4:up	277.736	234.785
YBR196C::chr2_4:up	527.698	383.07
YBR197C::chr2_4:up	249.962	296.571
YBR199W::chr2_4:up	708.227	852.641
YBR200W::chr2_4:up	222.189	173
YBR202W::chr2_4:up	444.378	395.428
YBR204C::chr2_4:up	152.755	135.928
YBR205W::chr2_4:up	513.812	494.284
YBR206W::chr2_4:up	805.434	691.998
YBR207W::chr2_4:up	319.396	395.428
YBR208C::chr2_4:up	1124.83	469.57
YBR209W::chr2_4:up	333.283	481.927
YBR211C::chr2_4:up	444.378	259.499
YBR212W::chr2_4:up	833.208	580.784
YBR214W::chr2_4:up	499.925	271.856
YBR216C::chr2_4:up	444.378	506.642
YBR217W::chr2_4:up	138.868	210.071
YBR218C::chr2_4:up	222.189	271.856
YBR219C::chr2_4:up	333.283	197.714
YBR220C::chr2_4:up	1541.43	1359.28
YBR222C::chr2_4:up	499.925	593.141
YBR224W::chr2_4:up	638.793	729.07
YBR225W::chr2_4:up	305.51	271.856
YBR226C::chr2_4:up	597.132	345.999
YBR227C::chr2_4:up	597.132	667.284
YBR228W::chr2_4:up	347.17	222.428
YBR229C::chr2_4:up	513.812	444.856
YBR230C::chr2_4:up	472.151	506.642
YBR231C::chr2_4:up	402.717	358.356
YBR232C::chr00_8:up	1347.02	1136.85
YBR233W::chr2_4:up	513.812	518.999
YBR234C::chr2_4:up	499.925	407.785
YBR235W::chr2_4:up	486.038	432.499
YBR236C::chr2_4:up	236.076	135.928
YBR237W::chr2_4:up	472.151	457.213
YBR238C::chr2_4:up	611.019	494.284
YBR239C::chr2_4:up	180.528	222.428
YBR240C::chr2_4:up	902.642	556.07
YBR241C::chr2_4:up	777.661	679.641
YBR242W::chr2_4:up	1263.7	1223.35
YBR244W::chr2_4:up	930.416	803.212
YBR245C::chr2_4:up	860.982	593.141
YBR246W::chr2_4:up	624.906	444.856
YBR247C::chr2_4:up	194.415	210.071
YBR248C::chr2_4:up	152.755	185.357
YBR249C::chr2_4:up	694.34	531.356
YBR250W::chr2_4:up	333.283	345.999
YBR251W::chr2_4:up	541.585	580.784
YBR252W::chr2_4:up	694.34	1186.28
YBR253W::chr2_4:up	222.189	234.785
YBR254C::chr2_4:up	680.453	444.856
YBR255W::chr2_4:up	472.151	580.784
YBR256C::chr2_4:up	888.755	790.855
YBR257W::chr2_4:up	152.755	148.285
YBR258C::chr2_4:up	291.623	234.785
YBR259W::chr2_4:up	888.755	654.927
YBR260C::chr2_4:up	402.717	358.356
YBR261C::chr2_4:up	527.698	308.928
YBR262C::chr2_4:up	972.076	729.07
YBR263W::chr2_4:up	541.585	444.856
YBR264C::chr2_4:up	611.019	593.141
YBR265W::chr2_4:up	249.962	321.285
YBR266C::chr2_4:up	430.491	284.214
YBR267W::chr2_4:up	1416.45	1062.71
YBR268W::chr2_4:up	972.076	1186.28
YBR269C::chr00_1:up	888.755	951.498
YBR270C::chr00_16a:up	708.227	877.355
YBR271W::chr00_1:up	583.246	803.212
YBR273C::chr00_1:up	416.604	308.928
YBR275C::chr00_16a:up	388.83	358.356
YBR276C::chr00_16a:up	388.83	308.928
YBR277C::chr00_1:up	722.114	827.926
YBR278W::chr00_1:up	291.623	271.856
YBR280C::chr00_16a:up	208.302	234.785
YBR281C::chr00_1:up	388.83	370.713
YBR282W::chr00_1:up	458.264	284.214
YBR284W::chr00_1:up	333.283	383.07
YBR285W::chr00_1:up	513.812	654.927
YBR286W::chr00_1:up	611.019	321.285
YBR287W::chr00_16a:up	666.566	766.141
YBR288C::chr00_16a:up	416.604	444.856
YBR289W::chr00_16a:up	111.094	185.357
YBR290W::chr00_1:up	319.396	395.428
YBR291C::chr00_1:up	194.415	173
YBR292C::chr00_1:up	361.057	345.999
YBR294W::chr00_16a:up	430.491	580.784
YBR296C::chr00_1:up	13.8868	642.57
YBR297W::chr00_1:up	916.529	926.783
YBR298C::chr00_1:up	291.623	271.856
YBR301W::chr00_16a:up	1569.21	1507.57
YCL001W-A::chr00_1:up	874.868	864.998
YCL001W::chr3_1:up	666.566	778.498
YCL002C::chr3_1:up	430.491	531.356
YCL003W::chr3_1:up	319.396	370.713
YCL004W::chr3_1:up	208.302	395.428
YCL006C::chr3_1/chr00_12:up	208.302	210.071
YCL007C::chr3_1:up	1124.83	753.784
YCL010C::chr3_1:up	27.7736	729.07
YCL011C::chr3_1:up	402.717	407.785
YCL012W::chr3_1:up	486.038	741.427
YCL013W::chr3_1:up	638.793	939.14
YCL016C::chr3_1:up	513.812	432.499
YCL017C::chr3_1:up	180.528	247.142
YCL023C::chr3_1/chr00_12:up	555.472	914.426
YCL024W::chr3_1:up	13.8868	432.499
YCL025C::chr3_1:up	319.396	506.642
YCL026C-A::chr00_16a:up	777.661	630.213
YCL026C::chr3_1:up	958.189	926.783
YCL028W::chr3_1:up	263.849	185.357
YCL030C::chr3_1:up	444.378	333.642
YCL033C::chr3_1:up	222.189	321.285
YCL035C::chr00_11:up	486.038	383.07
YCL037C::chr3_1:up	166.642	111.214
YCL038C::chr00_12:up	236.076	173
YCL040W::chr3_1:up	277.736	407.785
YCL041C::chr00_11:up	347.17	481.927
YCL041C::chr3_1:up	347.17	420.142
YCL042W::chr3_1:up	208.302	210.071
YCL044C::chr3_1:up	527.698	543.713
YCL045C::chr3_1:up	527.698	568.427
YCL046W::chr3_1:up	222.189	345.999
YCL048W::chr3_1:up	513.812	691.998
YCL049C::chr3_1:up	374.944	667.284
YCL050C::chr3_1:up	1277.59	1742.35
YCL051W::chr3_1:up	236.076	247.142
YCL052C::chr3_1:up	194.415	407.785
YCL053C::chr3_1:up	194.415	210.071
YCL054W::chr3_1:up	208.302	160.642
YCL055W::chr3_1:up	486.038	877.355
YCL056C::chr3_1:up	222.189	358.356
YCL057W::chr3_1:up	361.057	506.642
YCL058C::chr00_12:up	1055.4	1025.64
YCL061C::chr3_1:up	458.264	420.142
YCL062W::chr3_1:up	749.887	889.712
YCL063W::chr3_1:up	236.076	222.428
YCL064C::chr3_1:up	138.868	420.142
YCL069W::chr3_1:up	458.264	308.928
YCL074W::chr00_12:up	708.227	1013.28
YCL075W::chr00_12:up	1055.4	1124.5
YCL076W::chr00_12:up	444.378	790.855
YCR001W::chr3_1:up	1013.74	877.355
YCR002C::chr3_1:up	527.698	691.998
YCR003W::chr3_1:up	402.717	358.356
YCR005C::chr3_1:up	527.698	617.856
YCR006C::chr3_1:up	180.528	296.571
YCR008W::chr3_1:up	416.604	494.284
YCR009C::chr3_1:up	458.264	457.213
YCR010C::chr3_1:up	208.302	210.071
YCR011C::chr3_1:up	333.283	321.285
YCR012W::chr00_11:up	263.849	185.357
YCR012W::chr3_1:up	916.529	963.855
YCR013C::chr00_11:up	416.604	506.642
YCR013C::chr3_1:up	624.906	976.212
YCR014C::chr3_1:up	597.132	642.57
YCR015C::chr3_1:up	347.17	518.999
YCR016W::chr3_1:up	541.585	593.141
YCR017C::chr3_1:up	916.529	914.426
YCR019W::chr3_1:up	763.774	667.284
YCR020C::chr3_1:up	569.359	457.213
YCR020W-B::chr00_1:up	111.094	135.928
YCR021C::chr3_1:up	277.736	580.784
YCR022C::chr3_1:up	777.661	864.998
YCR023C::chr3_1:up	583.246	370.713
YCR024C-A::chr00_1:up	166.642	284.214
YCR024C::chr00_1:up	263.849	111.214
YCR027C::chr00_1:up	277.736	420.142
YCR028C::chr00_1:up	333.283	123.571
YCR030C::chr00_16a:up	277.736	383.07
YCR031C::chr00_1:up	263.849	173
YCR032W::chr00_16a:up	472.151	506.642
YCR033W::chr00_16a:up	583.246	432.499
YCR035C::chr00_1:up	194.415	86.4998
YCR036W::chr00_1:up	499.925	457.213
YCR043C::chr00_1:up	361.057	481.927
YCR044C::chr00_1:up	374.944	753.784
YCR045C::chr00_1:up	541.585	667.284
YCR046C::chr00_16a:up	97.2076	185.357
YCR048W::chr00_16a:up	305.51	160.642
YCR049C::chr00_1:up	291.623	296.571
YCR050C::chr00_1:up	194.415	210.071
YCR051W::chr00_1:up	208.302	111.214
YCR053W::chr00_16a:up	208.302	333.642
YCR054C::chr00_16a:up	361.057	469.57
YCR057C::chr00_16a:up	388.83	333.642
YCR059C::chr00_1:up	194.415	111.214
YCR060W::chr00_16a:up	888.755	778.498
YCR062W::chr00_16a:up	388.83	617.856
YCR063W::chr00_1:up	236.076	160.642
YCR064C::chr00_16a:up	736	395.428
YCR065W::chr00_1:up	472.151	259.499
YCR066W::chr00_1:up	527.698	395.428
YCR067C::chr00_16a:up	347.17	210.071
YCR068W::chr00_1:up	430.491	271.856
YCR069W::chr00_16a:up	208.302	308.928
YCR071C::chr00_1:up	263.849	284.214
YCR072C::chr00_16a:up	111.094	148.285
YCR073C::chr00_16a:up	999.85	1075.07
YCR075C::chr00_16a:up	319.396	432.499
YCR076C::chr00_1:up	694.34	1038
YCR079W::chr00_1:up	152.755	123.571
YCR081W::chr00_1:up	249.962	284.214
YCR083W::chr00_16a:up	694.34	568.427
YCR084C::chr00_16a:up	541.585	370.713
YCR085W::chr00_1:up	236.076	284.214
YCR087W::chr00_1:up	208.302	197.714
YCR088W::chr00_16a:up	277.736	135.928
YCR089W::chr00_16a:up	194.415	259.499
YCR090C::chr00_2:up	152.755	197.714
YCR091W::chr00_2:up	249.962	284.214
YCR092C::chr00_2:up	458.264	642.57
YCR093W::chr00_2:up	166.642	123.571
YCR094W::chr00_2:up	486.038	271.856
YCR095C::chr00_14:up	736	704.355
YCR098C::chr00_2:up	347.17	345.999
YCR099C::chr00_2:up	541.585	395.428
YCR100C::chr00_2:up	319.396	358.356
YCR101C::chr00_2:up	333.283	259.499
YCR102C::chr00_2:up	486.038	407.785
YCR102W-A::chr00_14:up	555.472	469.57
YCR105W::chr00_2:up	791.548	716.712
YCR106W::chr00_2:up	291.623	296.571
YCR107W::chr00_17a:up	333.283	271.856
YDL001W::chr4_1:up	791.548	691.998
YDL002C::chr4_1:up	541.585	753.784
YDL003W::chr4_1:up	513.812	518.999
YDL004W::chr4_1:up	305.51	506.642
YDL005C::chr4_1:up	527.698	593.141
YDL006W::chr4_1:up	611.019	432.499
YDL007W::chr4_1:up	611.019	753.784
YDL008W::chr4_1:up	1041.51	939.14
YDL009C::chr4_1:up	1527.55	1767.07
YDL010W::chr4_1:up	694.34	852.641
YDL011C::chr4_1:up	541.585	704.355
YDL012C::chr4_1:up	1027.62	1136.85
YDL013W::chr4_1:up	347.17	271.856
YDL014W::chr4_1:up	527.698	444.856
YDL016C::chr4_1:up	444.378	580.784
YDL018C::chr4_1:up	708.227	568.427
YDL019C::chr4_1:up	444.378	358.356
YDL020C::chr4_1:up	666.566	518.999
YDL022W::chr4_1:up	472.151	506.642
YDL023C::chr4_1:up	1041.51	1136.85
YDL024C::chr4_1:up	916.529	1248.07
YDL025C::chr4_1:up	541.585	605.498
YDL028C::chr4_1:up	319.396	420.142
YDL029W::chr4_1:up	402.717	494.284
YDL030W::chr4_1:up	819.321	580.784
YDL031W::chr00_17a:up	985.963	1149.21
YDL033C::chr4_1:up	333.283	679.641
YDL034W::chr4_1:up	263.849	234.785
YDL035C::chr4_1:up	402.717	222.428
YDL036C::chr4_1:up	1097.06	951.498
YDL037C::chr4_1:up	444.378	654.927
YDL039C::chr4_1:up	347.17	333.642
YDL040C::chr4_1:up	416.604	345.999
YDL041W::chr4_1:up	319.396	333.642
YDL042C::chr4_1:up	541.585	1050.35
YDL044C::chr4_1:up	305.51	407.785
YDL045C::chr4_1:up	569.359	642.57
YDL047W::chr4_1:up	124.981	185.357
YDL048C::chr4_1:up	708.227	716.712
YDL049C::chr4_1:up	333.283	321.285
YDL051W::chr4_1:up	347.17	605.498
YDL052C::chr4_1:up	277.736	173
YDL053C::chr4_1:up	249.962	222.428
YDL054C::chr4_1:up	277.736	469.57
YDL055C::chr4_1:up	361.057	494.284
YDL056W::chr4_1:up	374.944	617.856
YDL057W::chr4_1:up	291.623	469.57
YDL058W::chr00_17a:up	1041.51	1124.5
YDL059C::chr4_1:up	236.076	432.499
YDL060W::chr4_1:up	666.566	617.856
YDL062W::chr4_1:up	416.604	457.213
YDL063C::chr4_1:up	486.038	593.141
YDL064W::chr4_1:up	222.189	173
YDL065C::chr4_1:up	416.604	518.999
YDL066W::chr4_1:up	416.604	383.07
YDL067C::chr4_1:up	152.755	321.285
YDL068W::chr4_1:up	458.264	654.927
YDL070W::chr4_1:up	458.264	531.356
YDL071C::chr4_1:up	847.095	667.284
YDL072C::chr4_1:up	361.057	556.07
YDL074C::chr4_1:up	249.962	333.642
YDL075W::chr4_1:up	180.528	259.499
YDL077C::chr4_1:up	291.623	494.284
YDL078C::chr4_1:up	499.925	494.284
YDL079C::chr4_1:up	583.246	556.07
YDL080C::chr4_1:up	583.246	741.427
YDL082W::chr4_1:up	388.83	358.356
YDL083C::chr4_1:up	180.528	222.428
YDL084W::chr4_1:up	291.623	358.356
YDL085W::chr4_1:up	513.812	481.927
YDL086W::chr4_1:up	611.019	778.498
YDL087C::chr4_1:up	333.283	593.141
YDL088C::chr4_1:up	708.227	667.284
YDL090C::chr4_1:up	374.944	518.999
YDL091C::chr4_1:up	374.944	679.641
YDL092W::chr4_1:up	513.812	370.713
YDL093W::chr4_1:up	374.944	444.856
YDL094C::chr4_1:up	638.793	815.569
YDL095W::chr4_1:up	430.491	679.641
YDL096C::chr4_2:up	1013.74	1334.57
YDL098C::chr4_2:up	347.17	642.57
YDL099W::chr4_2:up	458.264	481.927
YDL100C::chr4_2:up	361.057	617.856
YDL101C::chr4_2:up	472.151	494.284
YDL104C::chr4_2:up	430.491	321.285
YDL105W::chr4_2:up	569.359	321.285
YDL106C::chr4_2:up	569.359	444.856
YDL107W::chr4_2:up	597.132	1000.93
YDL108W::chr4_2:up	513.812	531.356
YDL109C::chr4_2:up	444.378	729.07
YDL110C::chr4_2:up	458.264	518.999
YDL112W::chr4_2:up	874.868	840.284
YDL113C::chr4_2:up	930.416	1964.78
YDL115C::chr4_2:up	388.83	420.142
YDL116W::chr4_2:up	416.604	383.07
YDL118W::chr4_2:up	999.85	741.427
YDL119C::chr4_2:up	722.114	1075.07
YDL121C::chr4_2:up	374.944	457.213
YDL122W::chr4_2:up	111.094	210.071
YDL124W::chr4_2:up	708.227	580.784
YDL125C::chr4_2:up	513.812	568.427
YDL126C::chr4_2:up	874.868	1173.93
YDL128W::chr4_2:up	736	852.641
YDL129W::chr4_2:up	347.17	222.428
YDL130W-A::chr00_2:up	777.661	741.427
YDL130W::chr4_2:up	291.623	185.357
YDL131W::chr4_2:up	611.019	691.998
YDL132W::chr4_2:up	1374.79	1198.64
YDL133C-A::chr00_14:up	277.736	469.57
YDL133W::chr4_2:up	513.812	753.784
YDL134C-A::chr4_2:up	208.302	395.428
YDL136W::chr4_2:up	430.491	691.998
YDL137W::chr4_2:up	680.453	704.355
YDL138W::chr4_2:up	597.132	543.713
YDL139C::chr4_2:up	680.453	741.427
YDL141W::chr4_2:up	388.83	383.07
YDL143W::chr4_2:up	249.962	420.142
YDL144C::chr4_2:up	208.302	123.571
YDL148C::chr4_2:up	777.661	716.712
YDL149W::chr4_2:up	819.321	753.784
YDL150W::chr4_2:up	152.755	160.642
YDL151C::chr4_2:up	333.283	247.142
YDL152W::chr4_2:up	624.906	642.57
YDL153C::chr4_2:up	291.623	308.928
YDL154W::chr4_2:up	847.095	1359.28
YDL155W::chr4_2:up	763.774	1248.07
YDL156W::chr4_2:up	694.34	753.784
YDL157C::chr4_2:up	763.774	1000.93
YDL158C::chr4_2:up	597.132	630.213
YDL159W::chr4_2:up	694.34	691.998
YDL160C::chr4_2:up	499.925	654.927
YDL162C::chr4_2:up	249.962	494.284
YDL164C::chr4_2:up	791.548	630.213
YDL165W::chr4_2:up	860.982	704.355
YDL166C::chr4_2:up	1027.62	815.569
YDL167C::chr4_2:up	791.548	580.784
YDL168W::chr4_2:up	472.151	716.712
YDL169C::chr4_2:up	513.812	778.498
YDL171C::chr4_2:up	513.812	494.284
YDL172C::chr4_2:up	680.453	617.856
YDL173W::chr4_2:up	722.114	617.856
YDL174C::chr4_2:up	833.208	852.641
YDL175C::chr4_2:up	347.17	284.214
YDL176W::chr4_2:up	333.283	481.927
YDL177C::chr4_2:up	1180.38	766.141
YDL178W::chr4_2:up	652.68	716.712
YDL179W::chr4_2:up	1235.93	1346.93
YDL180W::chr4_2:up	833.208	939.14
YDL181W::chr4_2:up	833.208	1161.57
YDL182W::chr4_2:up	1124.83	1235.71
YDL183C::chr4_2:up	833.208	877.355
YDL184C::chr4_2:up	472.151	556.07
YDL185W::chr4_2:up	583.246	630.213
YDL186W::chr4_2:up	777.661	568.427
YDL189W::chr4_2:up	930.416	1198.64
YDL190C::chr4_2:up	3138.42	2928.64
YDL194W::chr00_16b:up	985.963	1235.71
YDL195W::chr4_3:up	402.717	370.713
YDL197C::chr4_3:up	652.68	827.926
YDL199C::chr4_3:up	97.2076	148.285
YDL200C::chr4_3:up	444.378	407.785
YDL201W::chr4_3:up	152.755	284.214
YDL202W::chr4_3:up	236.076	247.142
YDL203C::chr4_3:up	597.132	481.927
YDL205C::chr4_3:up	291.623	222.428
YDL210W::chr4_3:up	208.302	234.785
YDL212W::chr4_3:up	472.151	333.642
YDL213C::chr4_3:up	41.6604	173
YDL214C::chr4_3:up	513.812	605.498
YDL215C::chr4_3:up	541.585	593.141
YDL216C::chr4_3:up	291.623	222.428
YDL217C::chr4_3:up	124.981	271.856
YDL218W::chr4_3:up	402.717	358.356
YDL221W::chr4_3:up	624.906	494.284
YDL222C::chr4_3:up	763.774	716.712
YDL224C::chr4_3:up	402.717	222.428
YDL225W::chr4_3:up	388.83	580.784
YDL226C::chr4_3:up	333.283	481.927
YDL227C::chr4_3:up	388.83	741.427
YDL229W::chr4_3:up	624.906	580.784
YDL230W::chr4_3:up	916.529	951.498
YDL231C::chr4_3:up	263.849	271.856
YDL235C::chr4_3:up	69.434	135.928
YDL237W::chr4_3:up	361.057	296.571
YDL238C::chr4_3:up	180.528	284.214
YDL240W::chr4_3:up	416.604	568.427
YDL242W::chr4_3:up	208.302	222.428
YDL243C::chr4_3:up	263.849	333.642
YDR001C::chr4_3:up	180.528	197.714
YDR002W::chr4_3:up	305.51	24.7142
YDR003W::chr4_3:up	361.057	210.071
YDR004W::chr4_3:up	499.925	716.712
YDR005C::chr4_3:up	208.302	185.357
YDR006C::chr4_3:up	236.076	111.214
YDR007W::chr00_16b:up	180.528	432.499
YDR009W::chr4_3:up	277.736	457.213
YDR010C::chr4_3:up	333.283	494.284
YDR011W::chr4_3:up	388.83	494.284
YDR013W::chr4_3:up	249.962	234.785
YDR014W::chr4_3:up	291.623	481.927
YDR015C::chr4_3:up	277.736	370.713
YDR016C::chr4_3:up	708.227	481.927
YDR017C::chr4_3:up	277.736	370.713
YDR018C::chr4_3:up	152.755	345.999
YDR019C::chr4_3:up	541.585	543.713
YDR020C::chr4_3:up	333.283	531.356
YDR021W::chr4_3:up	763.774	1198.64
YDR022C::chr4_3:up	319.396	271.856
YDR023W::chr4_3:up	624.906	741.427
YDR024W::chr4_3:up	361.057	247.142
YDR025W::chr4_3:up	124.981	296.571
YDR026C::chr4_3:up	458.264	654.927
YDR027C::chr4_3:up	124.981	173
YDR028C::chr4_3:up	472.151	580.784
YDR029W::chr4_3:up	763.774	642.57
YDR031W::chr4_3:up	611.019	840.284
YDR034C::chr4_3:up	1263.7	1396.35
YDR036C::chr4_3:up	513.812	506.642
YDR037W::chr4_3:up	611.019	667.284
YDR041W::chr00_16b:up	527.698	383.07
YDR042C::chr4_3:up	458.264	815.569
YDR043C::chr4_3:up	388.83	370.713
YDR044W::chr4_3:up	1152.6	889.712
YDR045C::chr4_3:up	1013.74	1211
YDR046C::chr4_3:up	499.925	395.428
YDR047W::chr4_3:up	347.17	704.355
YDR048C::chr00_16b:up	291.623	469.57
YDR049W::chr4_4:up	527.698	481.927
YDR050C::chr00_11:up	180.528	222.428
YDR051C::chr4_4:up	458.264	395.428
YDR053W::chr4_4:up	527.698	593.141
YDR055W::chr4_4:up	166.642	444.856
YDR059C::chr4_4:up	388.83	407.785
YDR060W::chr4_4:up	402.717	617.856
YDR061W::chr4_4:up	611.019	679.641
YDR062W::chr4_4:up	347.17	543.713
YDR063W::chr4_4:up	194.415	284.214
YDR064W::chr4_4:up	361.057	160.642
YDR065W::chr4_4:up	347.17	333.642
YDR066C::chr4_4:up	638.793	630.213
YDR067C::chr4_4:up	388.83	284.214
YDR068W::chr4_4:up	194.415	420.142
YDR069C::chr4_4:up	291.623	457.213
YDR071C::chr00_11:up	402.717	568.427
YDR072C::chr4_4:up	638.793	766.141
YDR073W::chr4_4:up	430.491	679.641
YDR074W::chr00_11:up	416.604	358.356
YDR076W::chr4_4:up	555.472	518.999
YDR079W::chr4_4:up	402.717	617.856
YDR080W::chr4_4:up	499.925	679.641
YDR081C::chr4_4:up	527.698	481.927
YDR083W::chr4_4:up	291.623	383.07
YDR085C::chr4_4:up	319.396	333.642
YDR086C::chr4_4:up	458.264	741.427
YDR088C::chr4_4:up	361.057	469.57
YDR089W::chr4_4:up	513.812	531.356
YDR090C::chr4_4:up	819.321	630.213
YDR091C::chr4_4:up	472.151	605.498
YDR094W::chr4_4:up	541.585	704.355
YDR095C::chr4_4:up	416.604	333.642
YDR096W::chr4_4:up	166.642	197.714
YDR097C::chr4_4:up	499.925	518.999
YDR098C::chr4_4:up	430.491	370.713
YDR099W::chr4_4:up	277.736	259.499
YDR101C::chr4_4:up	805.434	642.57
YDR102C::chr4_4:up	541.585	803.212
YDR104C::chr4_4:up	444.378	481.927
YDR107C::chr4_4:up	361.057	395.428
YDR108W::chr4_4:up	444.378	469.57
YDR109C::chr4_4:up	972.076	729.07
YDR110W::chr4_4:up	388.83	605.498
YDR111C::chr4_4:up	638.793	790.855
YDR112W::chr4_4:up	666.566	926.783
YDR113C::chr4_4:up	791.548	568.427
YDR114C::chr4_4:up	430.491	432.499
YDR115W::chr4_4:up	388.83	506.642
YDR116C::chr4_4:up	55.5472	135.928
YDR118W::chr4_4:up	611.019	605.498
YDR119W::chr4_4:up	472.151	444.856
YDR121W::chr4_4:up	236.076	457.213
YDR122W::chr4_4:up	708.227	926.783
YDR123C::chr4_4:up	819.321	778.498
YDR124W::chr4_4:up	874.868	716.712
YDR125C::chr4_4:up	333.283	518.999
YDR126W::chr4_4:up	416.604	321.285
YDR127W::chr4_4:up	430.491	234.785
YDR128W::chr4_4:up	624.906	432.499
YDR129C::chr4_4:up	97.2076	210.071
YDR130C::chr4_4:up	263.849	605.498
YDR131C::chr4_4:up	374.944	308.928
YDR132C::chr4_4:up	597.132	667.284
YDR133C::chr4_4:up	361.057	284.214
YDR134C::chr4_4:up	416.604	395.428
YDR135C::chr4_4:up	1360.91	1544.64
YDR136C::chr4_4:up	402.717	580.784
YDR137W::chr4_4:up	374.944	407.785
YDR138W::chr4_4:up	972.076	988.569
YDR140W::chr4_4:up	944.302	963.855
YDR141C::chr4_4:up	819.321	864.998
YDR142C::chr4_4:up	499.925	518.999
YDR143C::chr4_4:up	291.623	691.998
YDR144C::chr4_4:up	388.83	457.213
YDR145W::chr4_4:up	263.849	173
YDR146C::chr4_4:up	874.868	864.998
YDR147W::chr4_5:up	999.85	1198.64
YDR148C::chr4_5:up	805.434	753.784
YDR149C::chr4_5:up	1166.49	1038
YDR150W::chr4_5:up	1027.62	1211
YDR151C::chr4_5:up	1152.6	1371.64
YDR152W::chr4_5:up	805.434	1173.93
YDR153C::chr4_5:up	944.302	1285.14
YDR154C::chr4_5:up	999.85	902.069
YDR155C::chr4_5:up	27.7736	1000.93
YDR156W::chr4_5:up	1110.94	1322.21
YDR157W::chr4_5:up	291.623	420.142
YDR159W::chr4_5:up	888.755	741.427
YDR160W::chr4_5:up	166.642	234.785
YDR161W::chr4_5:up	916.529	827.926
YDR162C::chr4_5:up	527.698	617.856
YDR163W::chr4_5:up	763.774	654.927
YDR164C::chr4_5:up	611.019	494.284
YDR166C::chr4_5:up	430.491	457.213
YDR169C::chr4_5:up	263.849	630.213
YDR171W::chr4_5:up	680.453	704.355
YDR172W::chr4_5:up	847.095	926.783
YDR174W::chr00_14:up	1763.62	1668.21
YDR176W::chr4_5:up	166.642	86.4998
YDR177W::chr4_5:up	402.717	395.428
YDR178W::chr4_5:up	985.963	803.212
YDR180W::chr4_5:up	486.038	679.641
YDR181C::chr4_5:up	666.566	593.141
YDR184C::chr4_5:up	402.717	432.499
YDR185C::chr4_5:up	472.151	457.213
YDR186C::chr4_5:up	458.264	729.07
YDR187C::chr4_5:up	208.302	210.071
YDR189W::chr4_5:up	444.378	617.856
YDR190C::chr4_5:up	374.944	407.785
YDR191W::chr4_5:up	499.925	580.784
YDR192C::chr4_5:up	402.717	284.214
YDR194C::chr4_5:up	860.982	654.927
YDR195W::chr4_5:up	583.246	506.642
YDR196C::chr4_5:up	985.963	1013.28
YDR197W::chr4_5:up	569.359	568.427
YDR198C::chr4_5:up	305.51	556.07
YDR201W::chr4_5:up	319.396	531.356
YDR202C::chr00_14:up	1124.83	1495.21
YDR203W::chr4_5:up	513.812	370.713
YDR204W::chr4_5:up	1110.94	976.212
YDR205W::chr00_14:up	736	988.569
YDR207C::chr4_5:up	749.887	790.855
YDR208W::chr4_5:up	430.491	407.785
YDR209C::chr4_5:up	1152.6	1013.28
YDR210W::chr4_5:up	722.114	679.641
YDR211W::chr4_5:up	249.962	345.999
YDR213W::chr4_5:up	472.151	753.784
YDR216W::chr4_5:up	597.132	778.498
YDR218C::chr4_5:up	847.095	729.07
YDR219C::chr4_5:up	666.566	481.927
YDR220C::chr4_5:up	736	914.426
YDR221W::chr4_5:up	777.661	864.998
YDR222W::chr4_5:up	291.623	543.713
YDR224C::chr4_5:up	111.094	222.428
YDR227W::chr4_5:up	55.5472	148.285
YDR228C::chr4_5:up	180.528	185.357
YDR229W::chr4_5:up	277.736	345.999
YDR230W::chr4_5:up	291.623	296.571
YDR231C::chr4_5:up	13.8868	148.285
YDR233C::chr4_5:up	291.623	148.285
YDR234W::chr4_5:up	249.962	148.285
YDR235W::chr4_5:up	319.396	333.642
YDR237W::chr4_5:up	166.642	197.714
YDR238C::chr4_5:up	138.868	135.928
YDR239C::chr4_5:up	208.302	173
YDR241W::chr4_5:up	541.585	630.213
YDR242W::chr00_17a:up	583.246	679.641
YDR243C::chr4_6:up	236.076	185.357
YDR244W::chr4_6:up	319.396	247.142
YDR246W::chr4_6:up	527.698	506.642
YDR248C::chr4_6:up	347.17	173
YDR249C::chr4_6:up	319.396	308.928
YDR250C::chr4_6:up	222.189	37.0713
YDR251W::chr4_6:up	930.416	667.284
YDR253C::chr4_6:up	263.849	210.071
YDR254W::chr4_6:up	388.83	234.785
YDR256C::chr4_6:up	152.755	160.642
YDR258C::chr4_6:up	236.076	135.928
YDR259C::chr4_6:up	361.057	148.285
YDR261C::chr4_6:up	263.849	247.142
YDR263C::chr4_6:up	166.642	148.285
YDR264C::chr4_6:up	249.962	308.928
YDR265W::chr4_6:up	152.755	24.7142
YDR268W::chr4_6:up	166.642	98.8569
YDR269C::chr4_6:up	152.755	0
YDR272W::chr4_6:up	222.189	197.714
YDR273W::chr4_6:up	374.944	284.214
YDR275W::chr4_6:up	194.415	86.4998
YDR276C::chr4_6:up	194.415	160.642
YDR278C::chr4_6:up	208.302	61.7856
YDR281C::chr4_6:up	222.189	259.499
YDR286C::chr4_6:up	305.51	210.071
YDR287W::chr4_6:up	180.528	148.285
YDR288W::chr4_6:up	208.302	111.214
YDR290W::chr4_6:up	180.528	74.1427
YDR291W::chr4_6:up	805.434	469.57
YDR293C::chr4_6:up	194.415	197.714
YDR294C::chr4_6:up	208.302	160.642
YDR295C::chr4_6:up	208.302	123.571
YDR296W::chr4_6:up	347.17	173
YDR297W::chr4_6:up	124.981	210.071
YDR299W::chr4_6:up	208.302	173
YDR300C::chr4_6:up	333.283	234.785
YDR302W::chr4_6:up	236.076	98.8569
YDR304C::chr4_6:up	319.396	259.499
YDR305C::chr4_6:up	180.528	160.642
YDR306C::chr4_6:up	402.717	284.214
YDR307W::chr4_6:up	236.076	173
YDR310C::chr4_6:up	305.51	247.142
YDR312W::chr4_6:up	277.736	148.285
YDR313C::chr4_6:up	180.528	234.785
YDR314C::chr4_6:up	222.189	234.785
YDR316W::chr4_6:up	97.2076	135.928
YDR317W::chr4_6:up	305.51	395.428
YDR319C::chr4_6:up	97.2076	148.285
YDR320C::chr4_6:up	361.057	296.571
YDR321W::chr4_6:up	333.283	160.642
YDR324C::chr4_6:up	249.962	197.714
YDR325W::chr4_6:up	222.189	24.7142
YDR326C::chr00_17a:up	1027.62	988.569
YDR327W::chr4_6:up	333.283	358.356
YDR331W::chr4_6:up	291.623	444.856
YDR332W::chr4_6:up	180.528	160.642
YDR334W::chr4_6:up	208.302	247.142
YDR338C::chr4_7:up	569.359	481.927
YDR344C::chr4_7:up	444.378	469.57
YDR345C::chr4_7:up	236.076	148.285
YDR346C::chr4_7:up	236.076	333.642
YDR347W::chr4_7:up	180.528	333.642
YDR349C::chr4_7:up	611.019	395.428
YDR350C::chr4_7:up	263.849	160.642
YDR351W::chr4_7:up	194.415	185.357
YDR352W::chr4_7:up	138.868	148.285
YDR354W::chr4_7:up	152.755	123.571
YDR355C::chr4_7:up	208.302	74.1427
YDR356W::chr4_7:up	249.962	370.713
YDR359C::chr4_7:up	194.415	86.4998
YDR360W::chr4_7:up	430.491	370.713
YDR361C::chr4_7:up	152.755	135.928
YDR362C::chr4_7:up	194.415	173
YDR363W-A::chr00_2:up	402.717	271.856
YDR365C::chr4_7:up	430.491	556.07
YDR367W::chr4_7:up	138.868	247.142
YDR368W::chr4_7:up	166.642	123.571
YDR370C::chr4_7:up	277.736	135.928
YDR371W::chr4_7:up	180.528	321.285
YDR372C::chr4_7:up	263.849	148.285
YDR378C::chr4_7:up	124.981	148.285
YDR380W::chr4_7:up	333.283	383.07
YDR381W::chr4_7:up	458.264	296.571
YDR383C::chr4_7:up	333.283	111.214
YDR384C::chr4_7:up	944.302	704.355
YDR386W::chr4_7:up	236.076	86.4998
YDR388W::chr4_7:up	97.2076	259.499
YDR389W::chr4_7:up	472.151	160.642
YDR390C::chr4_7:up	333.283	370.713
YDR391C::chr4_7:up	180.528	135.928
YDR393W::chr4_7:up	361.057	284.214
YDR394W::chr4_7:up	152.755	49.4284
YDR395W::chr4_7:up	236.076	296.571
YDR396W::chr4_7:up	472.151	345.999
YDR399W::chr4_7:up	458.264	444.856
YDR400W::chr4_7:up	791.548	321.285
YDR402C::chr4_7:up	166.642	271.856
YDR403W::chr4_7:up	458.264	247.142
YDR405W::chr4_7:up	222.189	86.4998
YDR406W::chr4_7:up	166.642	197.714
YDR407C::chr4_7:up	791.548	556.07
YDR409W::chr4_7:up	458.264	234.785
YDR411C::chr4_7:up	333.283	370.713
YDR412W::chr4_7:up	652.68	667.284
YDR413C::chr4_7:up	347.17	383.07
YDR414C::chr4_7:up	277.736	210.071
YDR416W::chr4_7:up	361.057	358.356
YDR417C::chr00_17a/chr00_18:up	888.755	321.285
YDR419W::chr4_7:up	1513.66	1767.07
YDR420W::chr4_7:up	152.755	148.285
YDR421W::chr4_7:up	486.038	444.856
YDR423C::chr4_7:up	833.208	568.427
YDR424C::chr00_8:up	499.925	370.713
YDR425W::chr4_7:up	319.396	247.142
YDR426C::chr4_7:up	430.491	284.214
YDR427W::chr00_11:up	361.057	358.356
YDR427W::chr4_7:up	291.623	296.571
YDR428C::chr4_7:up	111.094	234.785
YDR429C::chr4_7:up	291.623	197.714
YDR430C::chr4_7:up	972.076	704.355
YDR431W::chr4_7:up	569.359	469.57
YDR432W::chr4_7:up	1041.51	1087.43
YDR433W::chr4_7:up	624.906	580.784
YDR434W::chr4_7:up	416.604	494.284
YDR435C::chr4_7:up	291.623	234.785
YDR436W::chr4_7:up	680.453	667.284
YDR437W::chr4_8:up	930.416	716.712
YDR439W::chr4_8:up	430.491	420.142
YDR440W::chr4_8:up	430.491	469.57
YDR441C::chr4_8:up	805.434	605.498
YDR442W::chr4_8:up	263.849	173
YDR444W::chr00_17a:up	499.925	543.713
YDR445C::chr00_14:up	652.68	506.642
YDR446W::chr4_8:up	263.849	247.142
YDR451C::chr4_8:up	1472	939.14
YDR452W::chr4_8:up	666.566	543.713
YDR454C::chr4_8:up	402.717	383.07
YDR455C::chr4_8:up	416.604	284.214
YDR456W::chr4_8:up	277.736	111.214
YDR457W::chr4_8:up	249.962	321.285
YDR459C::chr4_8:up	236.076	148.285
YDR460W::chr4_8:up	388.83	284.214
YDR461W::chr00_17a:up	749.887	630.213
YDR463W::chr4_8:up	708.227	605.498
YDR465C::chr4_8:up	361.057	271.856
YDR466W::chr4_8:up	236.076	444.856
YDR467C::chr4_8:up	611.019	481.927
YDR468C::chr4_8:up	194.415	37.0713
YDR469W::chr4_8:up	444.378	420.142
YDR473C::chr4_8:up	930.416	926.783
YDR475C::chr4_8:up	430.491	296.571
YDR476C::chr4_8:up	805.434	630.213
YDR477W::chr4_8:up	722.114	654.927
YDR478W::chr4_8:up	916.529	914.426
YDR479C::chr4_8:up	860.982	864.998
YDR480W::chr4_8:up	374.944	494.284
YDR482C::chr4_8:up	736	617.856
YDR486C::chr4_8:up	777.661	469.57
YDR487C::chr4_8:up	277.736	247.142
YDR488C::chr4_8:up	708.227	766.141
YDR489W::chr4_8:up	583.246	457.213
YDR490C::chr4_8:up	1097.06	963.855
YDR491C::chr4_8:up	472.151	308.928
YDR493W::chr00_17a:up	666.566	580.784
YDR494W::chr4_8:up	319.396	185.357
YDR495C::chr4_8:up	666.566	654.927
YDR496C::chr4_8:up	208.302	271.856
YDR497C::chr4_8:up	694.34	370.713
YDR498C::chr00_17a:up	527.698	321.285
YDR499W::chr4_8:up	1041.51	593.141
YDR500C::chr00_17a:up	180.528	197.714
YDR502C::chr00_17a:up	541.585	691.998
YDR503C::chr4_8:up	569.359	531.356
YDR504C::chr4_8:up	347.17	308.928
YDR506C::chr00_17a:up	597.132	395.428
YDR509W::chr4_8:up	1208.15	926.783
YDR510W::chr4_8:up	305.51	160.642
YDR511W::chr4_8:up	680.453	667.284
YDR512C::chr00_17a:up	166.642	160.642
YDR512C::chr4_8:up	805.434	729.07
YDR513W::chr4_8:up	958.189	729.07
YDR514C::chr4_8:up	847.095	778.498
YDR515W::chr00_17a:up	930.416	1099.78
YDR517W::chr4_8:up	374.944	234.785
YDR519W::chr4_8:up	361.057	234.785
YDR520C::chr4_8:up	694.34	642.57
YDR521W::chr4_8:up	916.529	790.855
YDR522C::chr4_8:up	916.529	939.14
YDR523C::chr4_8:up	958.189	605.498
YDR524C::chr4_8:up	985.963	778.498
YDR525W-A::chr00_2:up	208.302	296.571
YDR525W::chr4_8:up	694.34	271.856
YDR526C::chr00_17a:up	430.491	432.499
YDR527W::chr4_8:up	944.302	902.069
YDR528W::chr4_8:up	194.415	543.713
YDR529C::chr4_8:up	805.434	1000.93
YDR530C::chr4_8:up	749.887	902.069
YDR531W::chr4_8:up	333.283	432.499
YDR532C::chr4_8:up	708.227	568.427
YDR533C::chr4_8:up	666.566	803.212
YDR534C::chr4_8:up	555.472	543.713
YDR536W::chr00_2:up	361.057	98.8569
YDR537C::chr00_14:up	305.51	234.785
YDR538W::chr00_2:up	680.453	716.712
YDR539W::chr00_2:up	333.283	407.785
YDR541C::chr00_2:up	319.396	234.785
YEL001C::chr5_2:up	1166.49	1038
YEL002C::chr5_2:up	263.849	370.713
YEL003W::chr5_2:up	513.812	395.428
YEL004W::chr5_2:up	624.906	963.855
YEL005C::chr5_2:up	263.849	333.642
YEL006W::chr5_2:up	194.415	123.571
YEL008W::chr5_2:up	833.208	617.856
YEL009C::chr5_2:up	1110.94	1384
YEL010W::chr5_2:up	611.019	654.927
YEL011W::chr00_8:up	41.6604	148.285
YEL012W::chr00_10:up	555.472	358.356
YEL013W::chr5_2:up	361.057	259.499
YEL014C::chr5_2:up	194.415	259.499
YEL015W::chr5_2:up	680.453	704.355
YEL016C::chr5_2:up	374.944	704.355
YEL017C-A::chr5_2:up	1138.72	889.712
YEL017W::chr5_2:up	402.717	370.713
YEL018W::chr5_2:up	833.208	753.784
YEL019C::chr5_2:up	388.83	234.785
YEL023C::chr5_2:up	749.887	1099.78
YEL024W::chr5_2:up	555.472	704.355
YEL025C::chr5_2:up	472.151	481.927
YEL026W::chr5_2:up	472.151	247.142
YEL027W::chr5_2:up	444.378	432.499
YEL028W::chr5_2:up	208.302	160.642
YEL029C::chr5_2:up	513.812	345.999
YEL031W::chr5_2:up	305.51	345.999
YEL032W::chr5_2:up	430.491	259.499
YEL033W::chr5_2:up	138.868	148.285
YEL034W::chr00_8:up	541.585	259.499
YEL036C::chr5_2:up	722.114	383.07
YEL037C::chr5_2:up	458.264	494.284
YEL038W::chr5_2:up	860.982	778.498
YEL039C::chr5_2:up	388.83	617.856
YEL040W::chr5_2:up	444.378	469.57
YEL042W::chr5_2:up	138.868	259.499
YEL043W::chr5_2:up	388.83	370.713
YEL044W::chr5_2:up	291.623	308.928
YEL047C::chr5_2:up	1430.34	1581.71
YEL048C::chr5_2:up	513.812	568.427
YEL049W::chr5_2:up	611.019	531.356
YEL050C::chr5_2:up	708.227	766.141
YEL051W::chr5_2:up	249.962	135.928
YEL053C::chr5_2:up	180.528	135.928
YEL054C::chr5_2:up	291.623	222.428
YEL055C::chr5_2:up	874.868	704.355
YEL056W::chr5_2:up	1097.06	1013.28
YEL057C::chr5_2:up	180.528	185.357
YEL058W::chr5_2:up	444.378	654.927
YEL059W::chr5_2:up	624.906	617.856
YEL060C::chr5_2:up	333.283	210.071
YEL061C::chr5_2:up	430.491	766.141
YEL062W::chr5_2:up	361.057	271.856
YEL063C::chr5_2:up	333.283	234.785
YEL065W::chr5_2:up	208.302	123.571
YEL066W::chr5_2:up	1138.72	1260.43
YEL067C::chr5_2:up	638.793	321.285
YEL068C::chr5_2:up	472.151	556.07
YEL071W::chr5_2:up	902.642	1248.07
YEL072W::chr5_2:up	708.227	852.641
YER001W::chr5_2:up	472.151	790.855
YER003C::chr5_2:up	958.189	1087.43
YER004W::chr5_2:up	444.378	679.641
YER005W::chr5_2:up	513.812	741.427
YER006W::chr5_2:up	708.227	469.57
YER007W::chr5_2:up	638.793	778.498
YER009W::chr5_2:up	319.396	370.713
YER010C::chr5_2:up	583.246	827.926
YER011W::chr5_2:up	486.038	704.355
YER012W::chr5_2:up	180.528	74.1427
YER013W::chr5_2:up	152.755	61.7856
YER014W::chr5_2:up	361.057	234.785
YER016W::chr5_3:up	763.774	902.069
YER017C::chr5_3:up	458.264	333.642
YER018C::chr5_3:up	305.51	296.571
YER019C-A::chr5_3:up	513.812	333.642
YER019W::chr5_3:up	527.698	840.284
YER020W::chr5_3:up	458.264	543.713
YER021W::chr5_3:up	611.019	531.356
YER022W::chr5_3:up	583.246	716.712
YER023W::chr5_3:up	499.925	617.856
YER024W::chr5_3:up	222.189	123.571
YER025W::chr5_3:up	83.3208	148.285
YER027C::chr00_11:up	430.491	531.356
YER027C::chr5_3:up	444.378	395.428
YER028C::chr5_3:up	472.151	494.284
YER030W::chr5_3:up	472.151	271.856
YER032W::chr5_3:up	555.472	531.356
YER033C::chr5_3:up	333.283	247.142
YER034W::chr5_3:up	652.68	679.641
YER035W::chr5_3:up	513.812	556.07
YER036C::chr5_3:up	819.321	1038
YER037W::chr00_11:up	333.283	197.714
YER037W::chr5_3:up	1194.26	877.355
YER038C::chr5_3:up	1347.02	1285.14
YER038W-A::chr5_3:up	583.246	679.641
YER039C-A::chr00_2:up	499.925	642.57
YER040W::chr5_3:up	291.623	457.213
YER041W::chr5_3:up	347.17	321.285
YER042W::chr5_3:up	236.076	135.928
YER043C::chr5_3:up	486.038	321.285
YER044C-A::chr5_3:up	985.963	1013.28
YER044C::chr5_3:up	374.944	210.071
YER045C::chr5_3:up	902.642	889.712
YER046W-A::chr5_3:up	361.057	321.285
YER046W::chr00_10:up	513.812	420.142
YER048C::chr5_3:up	499.925	457.213
YER048W-A::chr00_2:up	263.849	444.856
YER049W::chr5_3:up	874.868	939.14
YER050C::chr5_3:up	319.396	556.07
YER051W::chr5_3:up	277.736	197.714
YER052C::chr5_3:up	333.283	358.356
YER054C::chr5_3:up	236.076	395.428
YER055C::chr5_3:up	319.396	247.142
YER056C-A::chr5_3:up	527.698	568.427
YER056C::chr5_3:up	513.812	531.356
YER057C::chr5_3:up	902.642	1346.93
YER058W::chr5_3:up	208.302	370.713
YER059W::chr5_3:up	319.396	506.642
YER060W-A::chr5_3:up	83.3208	148.285
YER060W::chr5_3:up	513.812	667.284
YER061C::chr5_3:up	499.925	210.071
YER062C::chr5_3:up	527.698	679.641
YER063W::chr00_10:up	416.604	617.856
YER064C::chr00_8:up	277.736	494.284
YER065C::chr5_3:up	138.868	135.928
YER066W::chr00_10:up	333.283	210.071
YER067C-A::chr5_3:up	333.283	457.213
YER067W::chr5_3:up	152.755	111.214
YER068C-A::chr5_3:up	583.246	333.642
YER068W::chr5_3:up	388.83	308.928
YER069W::chr5_3:up	527.698	234.785
YER070W::chr5_3:up	458.264	407.785
YER071C::chr5_3:up	333.283	333.642
YER073W::chr5_3:up	472.151	506.642
YER074W::chr5_3:up	402.717	98.8569
YER075C::chr5_3:up	638.793	753.784
YER077C::chr00_8:up	347.17	457.213
YER078C::chr00_8:up	597.132	704.355
YER079W::chr5_3:up	361.057	197.714
YER080W::chr5_3:up	499.925	481.927
YER081W::chr5_3:up	749.887	556.07
YER082C::chr5_3:up	583.246	741.427
YER083C::chr5_3:up	513.812	358.356
YER084W::chr5_3:up	458.264	407.785
YER085C::chr5_3:up	333.283	296.571
YER086W::chr5_3:up	333.283	210.071
YER087C-A::chr5_3:up	319.396	432.499
YER087W::chr5_3:up	291.623	358.356
YER088C::chr00_8:up	652.68	383.07
YER089C::chr00_17a:up	777.661	333.642
YER090W::chr00_8:up	1069.28	988.569
YER091C-A::chr00_2:up	444.378	630.213
YER091C::chr00_8:up	69.434	148.285
YER092W::chr00_8:up	333.283	259.499
YER093C-A::chr00_8:up	402.717	148.285
YER094C::chr00_8:up	388.83	271.856
YER095W::chr00_8:up	652.68	741.427
YER096W::chr00_8:up	291.623	111.214
YER097W::chr00_8:up	222.189	173
YER098W::chr00_8:up	236.076	271.856
YER101C::chr00_5:up	249.962	284.214
YER103W::chr00_5:up	222.189	123.571
YER106W::chr00_5:up	499.925	691.998
YER107C::chr00_5:up	208.302	197.714
YER108C::chr00_5:up	569.359	543.713
YER109C::chr00_5:up	902.642	976.212
YER110C::chr00_5:up	319.396	568.427
YER111C::chr00_5:up	416.604	605.498
YER112W::chr00_5:up	472.151	383.07
YER113C::chr00_5:up	666.566	704.355
YER114C::chr00_5:up	249.962	98.8569
YER115C::chr00_5:up	374.944	296.571
YER116C::chr00_5:up	263.849	111.214
YER117W::chr00_5:up	97.2076	185.357
YER118C::chr00_5:up	152.755	111.214
YER119C-A::chr00_5:up	555.472	926.783
YER121W::chr00_5:up	541.585	741.427
YER123W::chr00_5:up	860.982	778.498
YER124C::chr00_5:up	361.057	481.927
YER126C::chr00_5:up	249.962	444.856
YER127W::chr00_5:up	569.359	630.213
YER128W::chr00_5:up	583.246	432.499
YER129W::chr00_5:up	402.717	617.856
YER130C::chr00_5:up	97.2076	197.714
YER132C::chr00_5:up	499.925	308.928
YER133W::chr00_5:up	291.623	370.713
YER134C::chr00_5:up	638.793	432.499
YER135C::chr00_5:up	638.793	432.499
YER136W::chr00_5:up	236.076	98.8569
YER137C::chr00_5:up	624.906	691.998
YER140W::chr00_5:up	347.17	308.928
YER141W::chr00_5:up	124.981	173
YER143W::chr00_5:up	194.415	74.1427
YER144C::chr00_2:up	249.962	197.714
YER145C::chr00_5:up	486.038	24.7142
YER146W::chr00_5:up	347.17	210.071
YER149C::chr00_5:up	277.736	383.07
YER150W::chr00_5:up	263.849	173
YER151C::chr00_5:up	361.057	197.714
YER153C::chr00_5:up	83.3208	135.928
YER154W::chr00_5:up	305.51	222.428
YER155C::chr00_5:up	263.849	333.642
YER156C::chr00_5:up	430.491	345.999
YER158C::chr00_5:up	499.925	630.213
YER159C::chr00_5:up	666.566	741.427
YER161C::chr00_5:up	555.472	469.57
YER163C::chr00_5:up	597.132	642.57
YER164W::chr00_5:up	444.378	630.213
YER165W::chr00_5:up	208.302	197.714
YER166W::chr00_5:up	388.83	494.284
YER167W::chr00_5:up	236.076	247.142
YER168C::chr00_5:up	97.2076	148.285
YER169W::chr00_5:up	680.453	605.498
YER170W::chr00_5:up	263.849	383.07
YER171W::chr00_5:up	333.283	481.927
YER172C::chr00_5:up	722.114	815.569
YER173W::chr00_5:up	541.585	667.284
YER174C::chr00_5:up	583.246	605.498
YER176W::chr00_5:up	194.415	98.8569
YER177W::chr00_5:up	291.623	98.8569
YER178W::chr00_5:up	486.038	370.713
YER179W::chr00_5:up	263.849	247.142
YER180C::chr00_5:up	236.076	296.571
YER181C::chr00_5:up	277.736	308.928
YER182W::chr00_5:up	333.283	247.142
YER183C::chr00_5:up	97.2076	197.714
YER184C::chr00_5:up	611.019	284.214
YER185W::chr00_5:up	444.378	951.498
YER187W::chr00_5:up	430.491	308.928
YFL002C::chr00_17a:up	194.415	160.642
YFL003C::chr00_17a:up	805.434	729.07
YFL004W::chr00_17a:up	888.755	753.784
YFL005W::chr00_17a:up	277.736	395.428
YFL006W::chr6_1:up	194.415	98.8569
YFL007W::chr00_17a:up	263.849	173
YFL008W::chr6_1:up	361.057	135.928
YFL009W::chr6_1:up	361.057	457.213
YFL010C::chr00_17a:up	416.604	222.428
YFL011W::chr6_1:up	472.151	630.213
YFL013C::chr00_17a:up	263.849	148.285
YFL013W-A::chr00_15:up	194.415	271.856
YFL014W::chr00_15:up	680.453	667.284
YFL015C::chr6_1:up	236.076	148.285
YFL016C::chr00_17a:up	486.038	333.642
YFL018C::chr6_1:up	374.944	247.142
YFL019C::chr00_15:up	472.151	345.999
YFL021W::chr6_1:up	666.566	741.427
YFL022C::chr6_1:up	569.359	580.784
YFL024C::chr6_1:up	347.17	259.499
YFL026W::chr00_16b:up	319.396	74.1427
YFL026W::chr6_1:up	319.396	383.07
YFL027C::chr6_1:up	638.793	506.642
YFL028C::chr6_1:up	236.076	210.071
YFL029C::chr00_18:up	958.189	1223.35
YFL030W::chr6_1:up	944.302	741.427
YFL031W::chr6_1:up	361.057	617.856
YFL033C::chr00_17a/chr00_18:up	833.208	815.569
YFL034C-A::chr00_2:up	499.925	630.213
YFL034W::chr6_1:up	611.019	531.356
YFL035C-A::chr6_1:up	291.623	135.928
YFL035C-B::chr6_1:up	152.755	333.642
YFL035C::chr6_1:up	458.264	667.284
YFL037W::chr6_1:up	402.717	494.284
YFL038C::chr6_1:up	888.755	679.641
YFL039C::chr00_15:up	152.755	61.7856
YFL040W::chr6_1:up	513.812	778.498
YFL041W::chr6_1:up	638.793	642.57
YFL042C::chr00_15:up	499.925	729.07
YFL043C::chr6_1:up	805.434	753.784
YFL044C::chr6_1:up	347.17	358.356
YFL045C::chr6_1:up	708.227	444.856
YFL046W::chr6_1:up	569.359	457.213
YFL047W::chr6_1:up	319.396	308.928
YFL049W::chr6_1:up	486.038	617.856
YFL050C::chr6_1:up	305.51	457.213
YFL051C::chr6_1:up	402.717	518.999
YFL052W::chr6_1:up	472.151	432.499
YFL053W::chr6_1:up	361.057	296.571
YFL054C::chr6_1:up	333.283	296.571
YFL055W::chr6_1:up	388.83	494.284
YFL056C::chr6_1:up	347.17	358.356
YFL063W::chr00_18:up	749.887	432.499
YFR001W::chr6_1:up	680.453	605.498
YFR002W::chr00_18:up	416.604	568.427
YFR003C::chr6_1:up	486.038	457.213
YFR004W::chr6_1:up	333.283	259.499
YFR006W::chr6_1:up	569.359	617.856
YFR007W::chr6_1:up	416.604	395.428
YFR009W::chr6_1:up	833.208	1136.85
YFR010W::chr6_1:up	55.5472	308.928
YFR011C::chr00_16b:up	833.208	679.641
YFR011C::chr6_1:up	402.717	345.999
YFR012W::chr6_1:up	541.585	667.284
YFR013W::chr00_16b:up	347.17	111.214
YFR014C::chr6_1:up	180.528	135.928
YFR015C::chr6_1:up	611.019	543.713
YFR017C::chr6_1:up	499.925	420.142
YFR018C::chr6_1:up	277.736	259.499
YFR019W::chr00_15:up	1110.94	1198.64
YFR020W::chr6_1:up	583.246	691.998
YFR022W::chr6_1:up	1402.57	1346.93
YFR023W::chr6_1:up	305.51	222.428
YFR024C-A::chr6_1:up	541.585	358.356
YFR024C::chr00_15:up	722.114	741.427
YFR025C::chr00_15:up	166.642	197.714
YFR026C::chr6_1:up	624.906	469.57
YFR027W::chr6_1:up	513.812	383.07
YFR028C::chr00_15:up	166.642	86.4998
YFR029W::chr00_15:up	819.321	803.212
YFR030W::chr00_15:up	388.83	222.428
YFR031C-A::chr6_1:up	527.698	247.142
YFR031C::chr00_15:up	874.868	457.213
YFR032C-A::chr00_2:up	249.962	259.499
YFR032C::chr00_2:up	874.868	704.355
YFR033C::chr00_2:up	513.812	345.999
YFR034C::chr00_2:up	860.982	691.998
YFR035C::chr00_2:up	916.529	1099.78
YFR036W::chr00_2:up	277.736	679.641
YFR037C::chr00_2:up	513.812	395.428
YFR039C::chr00_14:up	805.434	815.569
YFR040W::chr00_2:up	236.076	432.499
YFR041C::chr00_2:up	222.189	135.928
YFR042W::chr00_2:up	444.378	704.355
YFR044C::chr00_2:up	860.982	580.784
YFR045W::chr00_2:up	333.283	296.571
YFR046C::chr00_2:up	611.019	803.212
YFR047C::chr00_2:up	319.396	234.785
YFR050C::chr00_2:up	472.151	494.284
YFR051C::chr00_2:up	305.51	284.214
YFR052W::chr00_2:up	416.604	420.142
YFR053C::chr00_2:up	180.528	148.285
YFR054C::chr00_2:up	249.962	383.07
YFR056C::chr00_2:up	874.868	630.213
YGL001C::chr7_1:up	569.359	741.427
YGL004C::chr7_1:up	541.585	704.355
YGL005C::chr7_1:up	402.717	580.784
YGL007W::chr7_1:up	333.283	271.856
YGL008C::chr7_1:up	222.189	358.356
YGL009C::chr7_1:up	347.17	345.999
YGL010W::chr7_1:up	277.736	358.356
YGL011C::chr7_1:up	555.472	383.07
YGL013C::chr7_1:up	999.85	1421.07
YGL014W::chr7_1:up	402.717	494.284
YGL016W::chr7_1:up	555.472	852.641
YGL017W::chr7_1:up	708.227	630.213
YGL018C::chr7_1:up	749.887	741.427
YGL019W::chr7_1:up	152.755	135.928
YGL020C::chr7_1:up	333.283	432.499
YGL021W::chr7_1:up	249.962	432.499
YGL022W::chr7_1:up	708.227	729.07
YGL023C::chr7_1:up	263.849	197.714
YGL024W::chr7_1:up	402.717	518.999
YGL025C::chr7_1:up	763.774	1050.35
YGL026C::chr7_1:up	486.038	358.356
YGL027C::chr7_1:up	69.434	173
YGL028C::chr7_1:up	611.019	741.427
YGL029W::chr7_1:up	374.944	481.927
YGL032C::chr7_1:up	208.302	247.142
YGL034C::chr7_1:up	472.151	679.641
YGL036W::chr7_1:up	1222.04	1099.78
YGL037C::chr7_1:up	916.529	889.712
YGL038C::chr7_1:up	305.51	383.07
YGL039W::chr7_1:up	291.623	321.285
YGL040C::chr7_1:up	972.076	914.426
YGL042C::chr7_1:up	624.906	568.427
YGL043W::chr7_1:up	347.17	333.642
YGL045W::chr7_1:up	333.283	420.142
YGL046W::chr7_1:up	263.849	247.142
YGL048C::chr7_1:up	722.114	766.141
YGL049C::chr7_1:up	236.076	642.57
YGL050W::chr7_1:up	277.736	247.142
YGL051W::chr7_1:up	152.755	197.714
YGL053W::chr7_1:up	236.076	135.928
YGL054C::chr7_1:up	13.8868	729.07
YGL055W::chr7_1:up	180.528	271.856
YGL056C::chr7_1:up	555.472	593.141
YGL057C::chr7_1:up	972.076	815.569
YGL058W::chr7_1:up	402.717	321.285
YGL059W::chr7_1:up	416.604	321.285
YGL061C::chr7_1:up	402.717	580.784
YGL062W::chr7_1:up	624.906	778.498
YGL063W::chr7_1:up	736	691.998
YGL064C::chr7_1:up	916.529	1285.14
YGL065C::chr7_1:up	694.34	654.927
YGL066W::chr7_1:up	430.491	407.785
YGL067W::chr7_1:up	374.944	296.571
YGL070C::chr7_1:up	319.396	556.07
YGL071W::chr7_1:up	486.038	432.499
YGL072C::chr7_1:up	347.17	247.142
YGL074C::chr7_1:up	847.095	803.212
YGL075C::chr7_1:up	569.359	284.214
YGL076C::chr7_1:up	152.755	111.214
YGL077C::chr7_1:up	27.7736	160.642
YGL078C::chr7_1:up	374.944	383.07
YGL079W::chr7_1:up	569.359	506.642
YGL080W::chr7_1:up	1166.49	926.783
YGL081W::chr7_1:up	708.227	852.641
YGL082W::chr7_1:up	736	852.641
YGL083W::chr7_1:up	694.34	827.926
YGL084C::chr7_1:up	1222.04	1235.71
YGL085W::chr7_1:up	736	902.069
YGL086W::chr7_1:up	874.868	988.569
YGL087C::chr7_1:up	1069.28	1000.93
YGL088W::chr7_1:up	805.434	654.927
YGL089C::chr7_1:up	624.906	852.641
YGL090W::chr7_1:up	583.246	679.641
YGL091C::chr7_1:up	763.774	889.712
YGL092W::chr7_1:up	416.604	667.284
YGL093W::chr7_1:up	569.359	790.855
YGL094C::chr7_1:up	1652.53	1730
YGL095C::chr7_1:up	13.8868	2298.42
YGL096W::chr7_1:up	1805.28	1421.07
YGL097W::chr7_1/chr00_17a:up	2832.91	2483.78
YGL098W::chr7_2:up	361.057	370.713
YGL099W::chr7_2:up	83.3208	148.285
YGL101W::chr7_2:up	763.774	741.427
YGL102C::chr7_2:up	1916.38	1927.71
YGL103W::chr7_2:up	402.717	407.785
YGL107C::chr7_2:up	652.68	642.57
YGL110C::chr7_2:up	944.302	963.855
YGL111W::chr7_2:up	69.434	185.357
YGL112C::chr7_2:up	694.34	691.998
YGL113W::chr7_2:up	277.736	321.285
YGL114W::chr7_2:up	458.264	395.428
YGL115W::chr7_2:up	194.415	296.571
YGL116W::chr7_2:up	319.396	284.214
YGL117W::chr7_2:up	180.528	234.785
YGL118C::chr7_2:up	388.83	284.214
YGL121C::chr7_2:up	722.114	889.712
YGL122C::chr7_2:up	652.68	691.998
YGL123W::chr7_2:up	180.528	61.7856
YGL124C::chr7_2:up	902.642	556.07
YGL126W::chr7_2:up	1152.6	1087.43
YGL127C::chr7_2:up	333.283	247.142
YGL128C::chr7_2:up	388.83	741.427
YGL131C::chr7_2:up	860.982	679.641
YGL132W::chr7_2:up	486.038	506.642
YGL133W::chr7_2:up	638.793	667.284
YGL135W::chr7_2:up	902.642	630.213
YGL136C::chr7_2:up	513.812	308.928
YGL137W::chr7_2:up	374.944	556.07
YGL138C::chr7_2:up	333.283	420.142
YGL139W::chr7_2:up	222.189	234.785
YGL140C::chr7_2:up	444.378	556.07
YGL141W::chr7_2:up	805.434	766.141
YGL142C::chr7_2:up	83.3208	271.856
YGL143C::chr7_2:up	444.378	506.642
YGL146C::chr7_2:up	430.491	543.713
YGL147C::chr7_2:up	277.736	420.142
YGL149W::chr7_2:up	541.585	593.141
YGL150C::chr7_2:up	277.736	210.071
YGL151W::chr7_2:up	361.057	370.713
YGL152C::chr7_2:up	513.812	444.856
YGL153W::chr7_2:up	638.793	605.498
YGL154C::chr7_2:up	680.453	630.213
YGL155W::chr7_2:up	472.151	667.284
YGL156W::chr7_2:up	569.359	630.213
YGL157W::chr7_2:up	527.698	494.284
YGL158W::chr7_2:up	805.434	1013.28
YGL159W::chr7_2:up	319.396	432.499
YGL161C::chr7_2:up	708.227	864.998
YGL162W::chr7_2:up	777.661	877.355
YGL163C::chr7_2:up	305.51	321.285
YGL164C::chr7_2:up	277.736	395.428
YGL165C::chr7_2:up	1097.06	1198.64
YGL166W::chr7_2:up	347.17	531.356
YGL167C::chr7_2:up	541.585	790.855
YGL168W::chr7_2:up	860.982	852.641
YGL169W::chr7_2:up	722.114	568.427
YGL170C::chr7_2:up	902.642	827.926
YGL171W::chr7_2:up	194.415	395.428
YGL172W::chr7_2:up	541.585	580.784
YGL173C::chr7_2:up	638.793	333.642
YGL174W::chr7_2:up	347.17	383.07
YGL175C::chr7_2:up	361.057	284.214
YGL176C::chr7_2:up	402.717	469.57
YGL177W::chr7_2:up	666.566	827.926
YGL179C::chr7_2:up	597.132	481.927
YGL180W::chr7_2:up	736	963.855
YGL181W::chr7_2:up	1249.81	1532.28
YGL194C::chr7_3:up	916.529	704.355
YGL195W::chr7_3:up	388.83	420.142
YGL197W::chr7_3:up	541.585	296.571
YGL199C::chr7_3/chr00_12:up	208.302	123.571
YGL201C::chr7_3:up	430.491	259.499
YGL202W::chr7_3:up	263.849	185.357
YGL205W::chr7_3:up	249.962	61.7856
YGL206C::chr7_3:up	680.453	284.214
YGL207W::chr7_3:up	1083.17	864.998
YGL208W::chr7_3:up	388.83	321.285
YGL209W::chr7_3:up	111.094	173
YGL210W::chr7_3:up	361.057	333.642
YGL211W::chr7_3:up	333.283	173
YGL213C::chr7_3:up	597.132	407.785
YGL214W::chr7_3/chr00_12:up	249.962	86.4998
YGL215W::chr7_3:up	361.057	160.642
YGL216W::chr7_3:up	222.189	185.357
YGL217C::chr7_3/chr00_12:up	305.51	296.571
YGL218W::chr7_3/chr00_12:up	1194.26	642.57
YGL219C::chr00_14:up	624.906	420.142
YGL220W::chr7_3:up	249.962	135.928
YGL221C::chr7_3:up	319.396	284.214
YGL222C::chr7_3:up	666.566	234.785
YGL223C::chr7_3:up	444.378	247.142
YGL224C::chr7_3:up	444.378	358.356
YGL226C-A::chr7_3:up	236.076	86.4998
YGL227W::chr7_3:up	486.038	506.642
YGL230C::chr7_3:up	527.698	605.498
YGL231C::chr7_3:up	236.076	333.642
YGL233W::chr7_3:up	208.302	86.4998
YGL234W::chr7_3:up	347.17	222.428
YGL235W::chr7_3/chr00_12:up	347.17	222.428
YGL236C::chr7_3:up	249.962	210.071
YGL237C::chr7_3:up	402.717	308.928
YGL238W::chr7_3:up	166.642	86.4998
YGL239C::chr7_3/chr00_12:up	541.585	531.356
YGL240W::chr7_3:up	277.736	222.428
YGL241W::chr7_3:up	361.057	296.571
YGL242C::chr7_3:up	749.887	568.427
YGL246C::chr7_3:up	236.076	74.1427
YGL247W::chr7_3:up	236.076	247.142
YGL248W::chr7_3:up	277.736	222.428
YGL249W::chr7_3:up	208.302	197.714
YGL251C::chr7_3:up	222.189	308.928
YGL252C::chr7_3:up	138.868	148.285
YGL253W::chr7_3:up	583.246	358.356
YGL254W::chr7_3:up	722.114	630.213
YGL256W::chr7_3:up	138.868	173
YGL257C::chr7_3:up	152.755	98.8569
YGL259W::chr7_3:up	652.68	531.356
YGL260W::chr7_3:up	277.736	247.142
YGL262W::chr7_3:up	152.755	135.928
YGL263W::chr7_3:up	152.755	74.1427
YGR002C::chr7_3:up	180.528	210.071
YGR003W::chr7_3:up	333.283	222.428
YGR004W::chr7_3:up	208.302	333.642
YGR005C::chr7_3:up	236.076	111.214
YGR006W::chr7_3:up	166.642	247.142
YGR007W::chr7_3:up	472.151	333.642
YGR008C::chr7_3:up	263.849	383.07
YGR009C::chr7_3:up	277.736	247.142
YGR011W::chr7_3/chr00_12:up	138.868	284.214
YGR012W::chr7_3:up	722.114	902.069
YGR013W::chr7_3:up	124.981	135.928
YGR014W::chr7_3:up	208.302	123.571
YGR015C::chr7_3:up	402.717	506.642
YGR016W::chr7_3:up	347.17	358.356
YGR018C::chr7_3/chr00_12:up	416.604	284.214
YGR019W::chr7_3:up	263.849	197.714
YGR020C::chr7_3:up	513.812	580.784
YGR021W::chr7_3:up	944.302	1161.57
YGR022C::chr7_3/chr00_12:up	763.774	568.427
YGR023W::chr7_3:up	708.227	469.57
YGR024C::chr00_14:up	152.755	222.428
YGR025W::chr7_3/chr00_12:up	999.85	704.355
YGR026W::chr7_3:up	541.585	296.571
YGR027C::chr7_4:up	361.057	345.999
YGR028W::chr00_14:up	749.887	691.998
YGR030C::chr7_4:up	152.755	395.428
YGR031W::chr7_4:up	555.472	457.213
YGR032W::chr00_14:up	638.793	481.927
YGR033C::chr7_4:up	611.019	617.856
YGR034W::chr7_4:up	305.51	271.856
YGR035C::chr7_4:up	277.736	284.214
YGR036C::chr7_4:up	263.849	345.999
YGR038W::chr00_14:up	208.302	333.642
YGR039W::chr7_4:up	111.094	148.285
YGR040W::chr00_14:up	638.793	840.284
YGR042W::chr7_4:up	361.057	185.357
YGR043C::chr7_4:up	486.038	630.213
YGR044C::chr7_4:up	388.83	321.285
YGR045C::chr7_4:up	472.151	383.07
YGR046W::chr00_14:up	319.396	308.928
YGR047C::chr7_4:up	194.415	185.357
YGR048W::chr00_14:up	208.302	148.285
YGR049W::chr7_4:up	736	963.855
YGR050C::chr00_14:up	333.283	296.571
YGR051C::chr7_4:up	1624.76	1841.21
YGR052W::chr7_4:up	902.642	1248.07
YGR053C::chr00_14:up	1513.66	1248.07
YGR055W::chr7_4:up	430.491	469.57
YGR057C::chr7_4:up	388.83	407.785
YGR058W::chr7_4:up	722.114	667.284
YGR060W::chr7_4:up	624.906	469.57
YGR061C::chr7_4:up	249.962	296.571
YGR063C::chr00_14:up	486.038	383.07
YGR064W::chr7_4:up	333.283	457.213
YGR065C::chr7_4:up	666.566	630.213
YGR066C::chr7_4:up	555.472	729.07
YGR067C::chr7_4:up	874.868	864.998
YGR069W::chr7_4:up	958.189	691.998
YGR070W::chr7_4:up	27.7736	135.928
YGR071C::chr7_4:up	638.793	1112.14
YGR073C::chr7_4:up	444.378	420.142
YGR074W::chr7_4:up	1055.4	1384
YGR075C::chr7_4:up	1305.36	1643.5
YGR076C::chr7_4:up	402.717	395.428
YGR077C::chr7_4:up	680.453	1038
YGR078C::chr7_4:up	819.321	766.141
YGR079W::chr7_4:up	722.114	778.498
YGR080W::chr7_4:up	958.189	1013.28
YGR082W::chr00_14:up	222.189	247.142
YGR083C::chr7_4:up	486.038	420.142
YGR084C::chr7_4:up	541.585	444.856
YGR086C::chr00_14:up	499.925	654.927
YGR087C::chr7_4:up	638.793	877.355
YGR088W::chr7_4:up	763.774	642.57
YGR089W::chr00_14:up	263.849	284.214
YGR090W::chr7_4:up	347.17	420.142
YGR092W::chr00_14:up	208.302	259.499
YGR095C::chr7_4:up	152.755	210.071
YGR097W::chr7_4:up	666.566	753.784
YGR098C::chr7_4:up	333.283	543.713
YGR099W::chr7_4:up	499.925	407.785
YGR100W::chr7_4:up	347.17	370.713
YGR101W::chr7_4:up	513.812	506.642
YGR102C::chr7_4:up	652.68	543.713
YGR103W::chr7_4:up	527.698	358.356
YGR104C::chr7_4:up	583.246	889.712
YGR105W::chr7_4:up	736	840.284
YGR107W::chr7_4:up	819.321	543.713
YGR109C::chr7_4:up	749.887	790.855
YGR111W::chr7_4:up	1291.47	1149.21
YGR113W::chr7_4:up	152.755	543.713
YGR114C::chr7_4:up	194.415	74.1427
YGR115C::chr7_4:up	291.623	531.356
YGR116W::chr00_14:up	305.51	210.071
YGR117C::chr00_14:up	416.604	358.356
YGR118W::chr7_4:up	277.736	86.4998
YGR119C::chr7_4:up	124.981	160.642
YGR120C::chr7_4:up	291.623	185.357
YGR121C::chr7_4:up	611.019	321.285
YGR122C-A::chr00_17a:up	194.415	111.214
YGR122W::chr7_4:up	194.415	173
YGR123C::chr7_5:up	444.378	308.928
YGR124W::chr7_5:up	611.019	778.498
YGR125W::chr7_5:up	666.566	716.712
YGR127W::chr7_5:up	277.736	247.142
YGR128C::chr7_5:up	347.17	247.142
YGR129W::chr7_5:up	291.623	531.356
YGR131W::chr7_5:up	444.378	321.285
YGR133W::chr7_5:up	249.962	407.785
YGR134W::chr00_8:up	847.095	729.07
YGR135W::chr7_5:up	1138.72	1285.14
YGR136W::chr7_5:up	583.246	766.141
YGR139W::chr7_5:up	541.585	605.498
YGR140W::chr7_5:up	736	568.427
YGR141W::chr7_5:up	319.396	296.571
YGR143W::chr7_5:up	444.378	518.999
YGR144W::chr7_5:up	291.623	271.856
YGR145W::chr00_15:up	416.604	210.071
YGR146C::chr7_5:up	680.453	420.142
YGR147C::chr7_5:up	486.038	543.713
YGR148C::chr7_5:up	458.264	506.642
YGR151C::chr7_5:up	624.906	778.498
YGR154C::chr7_5:up	749.887	642.57
YGR155W::chr7_5:up	1041.51	951.498
YGR156W::chr7_5:up	611.019	729.07
YGR158C::chr7_5:up	347.17	358.356
YGR159C::chr7_5:up	555.472	420.142
YGR160W::chr7_5:up	541.585	729.07
YGR161C::chr7_5:up	999.85	630.213
YGR162W::chr00_17a:up	874.868	988.569
YGR163W::chr7_5:up	166.642	308.928
YGR164W::chr7_5:up	527.698	358.356
YGR165W::chr7_5:up	749.887	457.213
YGR167W::chr7_5:up	291.623	284.214
YGR168C::chr7_5:up	541.585	420.142
YGR169C::chr7_5:up	583.246	580.784
YGR170W::chr7_5:up	499.925	630.213
YGR171C::chr7_5:up	708.227	840.284
YGR172C::chr7_5:up	805.434	815.569
YGR173W::chr7_5:up	486.038	247.142
YGR174C::chr7_5:up	347.17	321.285
YGR175C::chr7_5:up	319.396	432.499
YGR176W::chr7_5:up	347.17	383.07
YGR177C::chr7_5:up	319.396	506.642
YGR178C::chr7_5:up	499.925	494.284
YGR179C::chr7_5:up	833.208	778.498
YGR180C::chr7_5:up	583.246	815.569
YGR181W::chr7_5:up	611.019	704.355
YGR182C::chr7_5:up	652.68	840.284
YGR183C::chr7_5:up	860.982	1062.71
YGR184C::chr7_5:up	388.83	407.785
YGR185C::chr7_5:up	902.642	679.641
YGR186W::chr7_5:up	749.887	976.212
YGR187C::chr7_5:up	194.415	160.642
YGR188C::chr00_10:up	152.755	210.071
YGR189C::chr7_5:up	1277.59	1359.28
YGR190C::chr7_5:up	569.359	852.641
YGR191W::chr7_5:up	263.849	148.285
YGR192C::chr7_5:up	430.491	457.213
YGR193C::chr7_5:up	166.642	98.8569
YGR194C::chr7_5:up	458.264	494.284
YGR195W::chr7_5:up	791.548	642.57
YGR196C::chr7_5:up	583.246	803.212
YGR197C::chr7_5:up	694.34	976.212
YGR199W::chr7_5:up	444.378	420.142
YGR200C::chr7_5:up	680.453	889.712
YGR202C::chr7_5:up	291.623	432.499
YGR203W::chr7_5:up	388.83	296.571
YGR204W::chr00_10:up	208.302	284.214
YGR205W::chr7_5:up	583.246	543.713
YGR206W::chr7_5:up	1721.96	1940.07
YGR207C::chr7_5:up	1110.94	1396.35
YGR208W::chr7_5:up	791.548	1025.64
YGR209C::chr7_5:up	263.849	86.4998
YGR210C::chr00_8:up	402.717	407.785
YGR211W::chr7_5:up	222.189	185.357
YGR212W::chr7_5:up	985.963	778.498
YGR213C::chr7_5:up	736	1297.5
YGR214W::chr7_5:up	444.378	395.428
YGR215W::chr7_5:up	847.095	778.498
YGR216C::chr7_5:up	999.85	1112.14
YGR219W::chr00_2:up	291.623	222.428
YGR220C::chr00_2:up	236.076	160.642
YGR221C::chr00_2:up	736	790.855
YGR222W::chr00_2:up	583.246	395.428
YGR223C::chr00_2:up	263.849	135.928
YGR224W::chr00_2:up	527.698	543.713
YGR225W::chr00_2:up	249.962	333.642
YGR226C::chr00_2:up	263.849	210.071
YGR227W::chr00_2:up	444.378	395.428
YGR228W::chr00_2:up	736	778.498
YGR229C::chr00_2:up	611.019	531.356
YGR230W::chr00_2:up	263.849	210.071
YGR233C::chr00_2:up	222.189	123.571
YGR234W::chr00_2:up	472.151	531.356
YGR235C::chr00_2:up	208.302	86.4998
YGR236C::chr00_2:up	180.528	518.999
YGR238C::chr00_14:up	985.963	902.069
YGR240C::chr00_2:up	291.623	222.428
YGR241C::chr00_2:up	736	840.284
YGR242W::chr00_2:up	1444.23	1519.92
YGR243W::chr00_2:up	805.434	543.713
YGR245C::chr00_2:up	486.038	432.499
YGR246C::chr00_2:up	402.717	197.714
YGR247W::chr00_2:up	249.962	345.999
YGR248W::chr00_14:up	888.755	1136.85
YGR249W::chr00_2:up	736	679.641
YGR250C::chr00_14:up	611.019	889.712
YGR251W::chr00_2:up	680.453	790.855
YGR252W::chr00_17a:up	486.038	469.57
YGR253C::chr00_3:up	444.378	222.428
YGR254W::chr00_17a:up	708.227	580.784
YGR255C::chr00_17a:up	416.604	420.142
YGR256W::chr00_3:up	736	741.427
YGR258C::chr00_17a:up	458.264	617.856
YGR259C::chr00_3:up	694.34	889.712
YGR260W::chr00_3:up	305.51	296.571
YGR261C::chr00_3:up	1291.47	1396.35
YGR263C::chr00_3:up	416.604	543.713
YGR264C::chr00_3:up	777.661	877.355
YGR266W::chr00_3:up	777.661	716.712
YGR267C::chr00_3:up	305.51	197.714
YGR269W::chr00_3:up	458.264	729.07
YGR270W::chr00_3:up	361.057	271.856
YGR271W::chr00_17a:up	652.68	679.641
YGR272C::chr00_17a:up	41.6604	160.642
YGR273C::chr00_17a:up	249.962	370.713
YGR277C::chr00_3:up	208.302	123.571
YGR278W::chr00_3:up	166.642	333.642
YGR279C::chr00_3:up	305.51	556.07
YGR280C::chr00_3:up	972.076	716.712
YGR281W::chr00_3:up	486.038	630.213
YGR282C::chr00_3:up	513.812	370.713
YGR283C::chr00_3:up	430.491	358.356
YGR284C::chr00_3:up	249.962	383.07
YGR285C::chr00_3:up	208.302	148.285
YGR286C::chr00_3:up	805.434	679.641
YGR287C::chr00_3:up	194.415	308.928
YGR288W::chr00_3:up	472.151	345.999
YGR291C::chr00_17a:up	416.604	185.357
YGR292W::chr00_17a:up	236.076	308.928
YGR295C::chr00_17b:up	513.812	383.07
YHL002W::chr00_10:up	194.415	148.285
YHL003C::chr8_1:up	1110.94	1198.64
YHL007C::chr8_1:up	236.076	234.785
YHL009C::chr8_1:up	430.491	617.856
YHL010C::chr8_1:up	444.378	481.927
YHL012W::chr8_1:up	944.302	963.855
YHL013C::chr8_1:up	1013.74	1248.07
YHL014C::chr8_1:up	638.793	827.926
YHL015W::chr8_1:up	874.868	704.355
YHL017W::chr8_1:up	916.529	1000.93
YHL019C::chr8_1:up	763.774	1062.71
YHL020C::chr8_1:up	527.698	271.856
YHL021C::chr8_1:up	458.264	654.927
YHL022C::chr8_1:up	263.849	135.928
YHL023C::chr8_1:up	124.981	259.499
YHL024W::chr00_8:up	236.076	197.714
YHL026C::chr8_1:up	388.83	185.357
YHL027W::chr8_1:up	1180.38	506.642
YHL030W::chr8_1:up	972.076	12.3571
YHL031C::chr8_1:up	486.038	370.713
YHL032C::chr8_1:up	319.396	308.928
YHL033C::chr8_1:up	486.038	531.356
YHL035C::chr8_1:up	13.8868	518.999
YHL036W::chr8_1:up	222.189	222.428
YHL038C::chr8_1:up	499.925	345.999
YHL040C::chr8_1:up	722.114	407.785
YHL041W::chr8_1:up	374.944	469.57
YHL042W::chr8_1:up	1583.1	1062.71
YHL043W::chr8_1:up	1319.25	1038
YHL044W::chr8_1:up	194.415	333.642
YHL045W::chr8_1:up	1291.47	1519.92
YHL046C::chr8_1:up	472.151	593.141
YHL047C::chr8_1:up	1124.83	864.998
YHR001W-A::chr8_1:up	638.793	531.356
YHR003C::chr00_10:up	666.566	741.427
YHR004C::chr00_10:up	1249.81	1322.21
YHR005C::chr00_10:up	597.132	630.213
YHR006W::chr00_10:up	958.189	1396.35
YHR007C::chr00_10:up	333.283	284.214
YHR008C::chr00_10:up	430.491	432.499
YHR009C::chr00_10:up	486.038	271.856
YHR012W::chr8_1:up	222.189	185.357
YHR013C::chr8_1:up	236.076	160.642
YHR014W::chr8_1:up	236.076	185.357
YHR015W::chr8_1:up	541.585	333.642
YHR016C::chr00_8:up	416.604	395.428
YHR017W::chr00_8:up	277.736	259.499
YHR018C::chr8_1:up	805.434	889.712
YHR021C::chr8_1:up	860.982	296.571
YHR023W::chr00_10:up	180.528	494.284
YHR024C::chr8_1:up	361.057	481.927
YHR025W::chr00_10:up	124.981	135.928
YHR026W::chr00_10:up	194.415	160.642
YHR028C::chr8_1:up	319.396	185.357
YHR029C::chr8_1:up	194.415	98.8569
YHR031C::chr8_1:up	652.68	691.998
YHR032W::chr00_8:up	597.132	506.642
YHR033W::chr8_1:up	999.85	766.141
YHR034C::chr8_1:up	569.359	766.141
YHR035W::chr8_1:up	527.698	271.856
YHR036W::chr8_1:up	402.717	383.07
YHR037W::chr8_1:up	430.491	568.427
YHR038W::chr8_1:up	263.849	74.1427
YHR039C-B::chr00_3:up	361.057	259.499
YHR039C::chr8_1:up	499.925	284.214
YHR041C::chr00_10:up	402.717	333.642
YHR042W::chr8_1:up	249.962	284.214
YHR043C::chr8_1:up	208.302	197.714
YHR044C::chr8_1:up	694.34	704.355
YHR045W::chr00_8:up	652.68	580.784
YHR046C::chr8_2:up	1319.25	1272.78
YHR047C::chr8_2:up	1277.59	951.498
YHR048W::chr8_2:up	1083.17	1099.78
YHR049C-A::chr8_2:up	847.095	1000.93
YHR049W::chr8_2:up	1319.25	1309.85
YHR050W::chr8_2:up	1194.26	1470.5
YHR051W::chr8_2:up	499.925	444.856
YHR057C::chr8_2:up	444.378	543.713
YHR058C::chr00_10:up	333.283	469.57
YHR060W::chr8_2:up	236.076	222.428
YHR061C::chr8_2:up	541.585	457.213
YHR065C::chr8_2:up	541.585	457.213
YHR066W::chr8_2:up	402.717	642.57
YHR067W::chr00_10:up	624.906	556.07
YHR068W::chr8_2:up	958.189	1408.71
YHR070W::chr8_2:up	666.566	457.213
YHR073W::chr8_2:up	416.604	296.571
YHR075C::chr8_2:up	472.151	296.571
YHR076W::chr8_2:up	305.51	395.428
YHR077C::chr8_2:up	722.114	1000.93
YHR078W::chr8_2:up	708.227	1124.5
YHR079C-B::chr00_3:up	124.981	358.356
YHR079C::chr8_2:up	416.604	420.142
YHR080C::chr8_2:up	291.623	148.285
YHR081W::chr8_2:up	624.906	469.57
YHR083W::chr8_2:up	722.114	630.213
YHR084W::chr8_2:up	763.774	432.499
YHR086W::chr8_2:up	624.906	840.284
YHR087W::chr8_2:up	777.661	556.07
YHR091C::chr8_2:up	555.472	457.213
YHR092C::chr8_2:up	791.548	741.427
YHR093W::chr8_2:up	1069.28	1112.14
YHR094C::chr8_2:up	388.83	543.713
YHR095W::chr8_2:up	624.906	308.928
YHR096C::chr8_2:up	680.453	729.07
YHR097C::chr8_2:up	499.925	815.569
YHR100C::chr8_2:up	499.925	395.428
YHR101C::chr8_2:up	319.396	321.285
YHR103W::chr8_2:up	624.906	654.927
YHR104W::chr8_2:up	805.434	1075.07
YHR106W::chr8_2:up	597.132	605.498
[truncated: 7,206 more rows]

## Sheet: ground+NaCl
Strain tag	7 generations	14 generations	21 generations
YAL012W::chr00_12:dn	41.7878	35.6257	36.8651
YAL016W::chr00_12:dn	803.865	850.158	570.867
YAL024C::chr00_17a:dn	27.492	12.415	15.1797
YAL047C::chr00_12:dn	149.556	152.219	105.174
YAL054C::chr00_12:dn	89.074	146.281	261.309
YAL058C-A::chr00_12:dn	801.666	909.534	932.47
YAR002C-A::chr00_16a:dn	5.4984	2.69891	11.3848
YAR050W::chr00_12:dn	42.8875	22.1311	38.4915
YBL001C::chr2_1:dn	14.2958	4.85805	2.16854
YBL004W::chr2_1:dn	3.29904	3.2387	9.75841
YBL007C::chr2_1:dn	101.17	83.1266	104.632
YBL009W::chr2_1:dn	83.5756	48.5805	71.0195
YBL012C::chr2_1:dn	20.8939	8.09674	21.1432
YBL015W::chr2_1:dn	14.2958	11.8752	9.75841
YBL018C::chr2_1:dn	18.6945	11.8752	22.7696
YBL022C::chr2_1:dn	16.4952	5.39783	4.87921
YBL027W::chr2_1:dn	14.2958	10.7957	8.13201
YBL028C::chr2_1:dn	16.4952	20.5117	17.8904
YBL030C::chr2_1:dn	12.0965	6.47739	15.7219
YBL032W::chr2_1:dn	9.89711	4.85805	7.04774
YBL035C::chr2_1:dn	81.3763	63.1546	67.7667
YBL036C::chr2_1:dn	18.6945	23.7504	26.5646
YBL037W::chr2_1:dn	15.3955	8.09674	12.4691
YBL038W::chr2_1:dn	3.29904	3.2387	7.04774
YBL040C::chr2_1:dn	17.5949	4.85805	11.3848
YBL043W::chr2_1:dn	93.4727	75.0298	104.09
YBL046W::chr2_1:dn	63.7814	31.3074	42.2864
YBL047C::chr2_1:dn	6.59807	5.93761	6.50561
YBL048W::chr2_1:dn	78.0772	73.4105	70.4774
YBL050W::chr2_1:dn	18.6945	13.4946	17.3483
YBL051C::chr2_1:dn	42.8875	44.802	54.7555
YBL056W::chr2_1:dn	29.6913	26.9891	26.5646
YBL057C::chr2_1:dn	13.1961	7.01718	11.3848
YBL058W::chr2_1:dn	5.4984	4.31826	9.75841
YBL059W::chr2_1:dn	43.9872	20.5117	28.191
YBL060W::chr2_1:dn	20.8939	10.2559	18.9747
YBL061C::chr2_1:dn	5.4984	2.15913	5.96347
YBL063W::chr2_1:dn	94.5724	9.71609	66.1403
YBL067C::chr2_1:dn	7.69775	4.85805	5.96347
YBL071C::chr2_1:dn	8.79743	0	14.0955
YBL072C::chr2_1:dn	31.8907	53.9783	44.455
YBL073W::chr2_1:dn	45.0868	36.7052	38.4915
YBL074C::chr2_1:dn	13.1961	12.415	13.0112
YBL077W::chr2_1:dn	13.1961	7.55696	13.5533
YBL078C::chr2_1:dn	51.6849	53.4385	69.9353
YBL080C::chr2_1:dn	5.4984	1.61935	5.96347
YBL081W::chr2_1:dn	9.89711	7.01718	3.2528
YBL082C::chr2_1:dn	3.29904	1.07957	6.50561
YBL083C::chr2_1:dn	4.39872	1.07957	5.96347
YBL084C::chr2_1:dn	47.2862	33.4665	38.4915
YBL085W::chr2_1:dn	9.89711	10.2559	12.4691
YBL086C::chr2_1:dn	60.4824	49.1202	62.8875
YBL088C::chr2_1:dn	28.5917	23.7504	18.4326
YBL089W::chr2_1:dn	10.9968	13.4946	10.3005
YBL092W::chr2_1:dn	48.3859	60.4557	41.7443
YBL094C::chr2_1:dn	219.936	199.72	253.177
YBL095W::chr2_2:dn	35.1897	18.3526	22.2275
YBL097W::chr2_2:dn	2.19936	9.71609	8.13201
YBL098W::chr2_2:dn	119.865	85.2857	143.123
YBL099W::chr2_2:dn	6.59807	2.69891	7.58987
YBL100C::chr2_2:dn	17.5949	16.7333	19.5168
YBL101C::chr2_2:dn	6.59807	15.1139	17.8904
YBL102W::chr2_2:dn	0	7.55696	7.04774
YBL104C::chr2_2:dn	5.4984	3.77848	5.96347
YBL105C::chr2_2:dn	111.068	60.4557	111.137
YBL106C::chr2_2:dn	34.0901	29.1483	35.2387
YBL107C::chr2_2:dn	68.1801	59.3761	58.0083
YBR001C::chr2_2:dn	46.1865	39.4041	31.4438
YBR003W::chr2_2:dn	4.39872	6.47739	5.96347
YBR004C::chr2_2:dn	27.492	42.6428	35.7808
YBR005W::chr2_2:dn	115.466	51.2794	54.7555
YBR007C::chr2_2:dn	5.4984	4.85805	11.3848
YBR009C::chr2_2:dn	14.2958	10.2559	11.9269
YBR011C::chr2_2:dn	105.569	80.4276	113.848
YBR012C::chr2_2:dn	36.2894	29.6881	25.4803
YBR013C::chr2_2:dn	62.6817	31.8472	38.4915
YBR014C::chr2_2:dn	18.6945	7.01718	7.04774
YBR015C::chr2_2:dn	32.9904	18.3526	26.5646
YBR016W::chr2_2:dn	8.79743	4.31826	6.50561
YBR017C::chr2_2:dn	17.5949	5.93761	9.21628
YBR019C::chr2_2:dn	89.074	97.1609	124.149
YBR020W::chr00_18:dn	26.3923	7.01718	12.4691
YBR020W::chr2_2:dn	141.859	96.6211	129.57
YBR021W::chr2_2:dn	14.2958	1.61935	2.71067
YBR022W::chr2_2:dn	73.6785	43.7224	63.9718
YBR024W::chr2_2:dn	50.5852	39.9439	52.587
YBR027C::chr2_2:dn	21.9936	27.5289	36.8651
YBR028C::chr2_2:dn	91.2734	51.2794	83.4886
YBR029C::chr2_2:dn	10.9968	10.7957	15.7219
YBR033W::chr2_2:dn	15.3955	10.2559	7.58987
YBR035C::chr2_2:dn	9.89711	7.01718	5.42134
YBR036C::chr2_2:dn	912.734	1115.19	1085.89
YBR037C::chr2_2:dn	10.9968	12.9548	17.8904
YBR038W::chr2_2:dn	12.0965	7.55696	8.13201
YBR039W::chr2_2:dn	47.2862	26.9891	40.1179
YBR044C::chr2_2:dn	6.59807	30.2278	3.79494
YBR045C::chr2_2:dn	17.5949	13.4946	13.0112
YBR046C::chr2_2:dn	7.69775	10.2559	17.8904
YBR048W::chr2_2:dn	29.6913	38.3246	21.6854
YBR053C::chr2_2:dn	3.29904	7.55696	3.2528
YBR055C::chr2_2:dn	8.79743	6.47739	7.04774
YBR056W::chr2_2:dn	24.1929	11.3354	21.6854
YBR059C::chr2_2:dn	15.3955	6.47739	12.4691
YBR062C::chr2_2:dn	5.4984	4.31826	8.67414
YBR063C::chr2_2:dn	17.5949	11.8752	10.3005
YBR064W::chr2_2:dn	75.8779	27.5289	42.2864
YBR067C::chr2_2:dn	89.074	62.075	86.7414
YBR069C::chr2_2:dn	18.6945	7.01718	11.9269
YBR070C::chr2_2:dn	19.7942	7.01718	13.5533
YBR071W::chr2_2:dn	8.79743	8.63652	7.58987
YBR072W::chr2_2:dn	30.791	29.6881	34.1544
YBR073W::chr2_2:dn	26.3923	34.0063	31.4438
YBR074W::chr2_2:dn	5.4984	2.69891	10.3005
YBR075W::chr00_18:dn	810.464	782.685	542.134
YBR075W::chr2_2:dn	23.0933	48.5805	101.921
YBR077C::chr2_2:dn	15.3955	35.0859	8.13201
YBR079C::chr2_2:dn	7.69775	3.2387	7.04774
YBR080C::chr00_16a:dn	7.69775	8.09674	8.13201
YBR081C::chr2_3:dn	9.89711	7.55696	4.33707
YBR083W::chr00_16a:dn	53.8843	38.8644	47.1656
YBR086C::chr2_3:dn	8.79743	7.55696	14.0955
YBR088C::chr00_16a:dn	1199.75	1143.8	1128.18
YBR089W::chr2_3:dn	28.5917	26.4494	24.9382
YBR090C-A::chr2_3:dn	25.2926	12.9548	28.191
YBR090C::chr00_16a:dn	5.4984	5.93761	12.4691
YBR091C::chr2_3:dn	6.59807	5.39783	8.13201
YBR092C::chr2_3:dn	8.79743	5.93761	13.5533
YBR093C::chr2_3:dn	14.2958	14.5741	10.3005
YBR095C::chr2_3:dn	7.69775	1.61935	6.50561
YBR098W::chr2_3:dn	10.9968	9.71609	2.16854
YBR099C::chr2_3:dn	6.59807	8.63652	4.33707
YBR100W::chr2_3/chr00_16a:dn	16.4952	4.85805	11.9269
YBR102C::chr2_3:dn	54.984	36.7052	41.2022
YBR104W::chr2_3:dn	58.283	42.6428	61.8033
YBR106W::chr2_3:dn	20.8939	14.0344	13.0112
YBR110W::chr2_3:dn	72.5788	59.9159	55.2977
YBR111C::chr2_3:dn	20.8939	12.9548	14.6376
YBR112C::chr00_16a:dn	6.59807	8.09674	10.8427
YBR113W::chr2_3:dn	23.0933	17.8128	22.7696
YBR114W::chr2_3:dn	17.5949	15.6537	20.059
YBR116C::chr2_3:dn	8.79743	7.01718	8.13201
YBR121C::chr00_16a:dn	1568.14	1422.33	1903.43
YBR123C::chr2_3:dn	27.492	33.4665	40.1179
YBR124W::chr2_3:dn	21.9936	8.63652	17.3483
YBR125C::chr00_16a:dn	8.79743	4.31826	8.13201
YBR126C::chr2_3:dn	21.9936	8.09674	15.1797
YBR127C::chr2_3:dn	39.5884	42.6428	58.0083
YBR128C::chr2_3:dn	19.7942	11.3354	13.5533
YBR130C::chr2_3:dn	9.89711	8.09674	16.264
YBR131W::chr00_16a:dn	38.4888	25.9096	36.323
YBR134W::chr2_3:dn	4.39872	4.31826	7.04774
YBR136W::chr2_3:dn	15.3955	6.47739	6.50561
YBR139W::chr2_3:dn	20.8939	26.9891	25.4803
YBR140C::chr2_3:dn	3.29904	9.17631	3.2528
YBR141C::chr2_3:dn	10.9968	8.09674	11.3848
YBR142W::chr2_3:dn	43.9872	66.3933	49.8763
YBR144C::chr2_3:dn	12.0965	3.77848	15.1797
YBR145W::chr2_3:dn	82.4759	58.2965	69.9353
YBR146W::chr2_3:dn	49.4856	25.9096	46.0814
YBR147W::chr2_3:dn	25.2926	16.7333	24.9382
YBR149W::chr2_3:dn	5.4984	0.539783	6.50561
YBR150C::chr00_16a:dn	12.0965	10.2559	17.8904
YBR151W::chr2_3:dn	20.8939	16.1935	17.3483
YBR153W::chr2_3:dn	27.492	10.7957	22.2275
YBR157C::chr2_3:dn	191.344	119.292	35.7808
YBR158W::chr2_3:dn	182.547	503.617	478.162
YBR160W::chr2_3:dn	4.39872	8.09674	8.67414
YBR162W-A::chr2_3:dn	9.89711	6.47739	7.04774
YBR164C::chr2_3:dn	120.965	75.0298	97.5841
YBR166C::chr2_3:dn	7.69775	9.71609	7.58987
YBR168W::chr00_16a:dn	86.8747	58.8363	67.2246
YBR169C::chr00_16a:dn	12.0965	10.2559	9.75841
YBR171W::chr2_3:dn	14.2958	7.55696	8.67414
YBR173C::chr2_4:dn	16.4952	29.1483	23.8539
YBR174C::chr2_4:dn	37.3891	25.9096	42.2864
YBR178W::chr2_4:dn	7.69775	5.39783	5.96347
YBR180W::chr2_4:dn	112.167	66.3933	74.2723
YBR185C::chr2_4:dn	14.2958	6.47739	15.7219
YBR186W::chr2_4:dn	3.29904	3.77848	8.13201
YBR187W::chr2_4:dn	48.3859	66.3933	87.8257
YBR188C::chr2_4:dn	4.39872	9.71609	9.75841
YBR191W::chr00_11:dn	581.73	376.768	281.367
YBR194W::chr2_4:dn	17.5949	7.01718	15.7219
YBR195C::chr2_4:dn	13.1961	11.8752	15.7219
YBR196C::chr2_4:dn	8.79743	4.31826	10.3005
YBR197C::chr2_4:dn	6.59807	5.39783	8.67414
YBR199W::chr2_4:dn	52.7846	58.2965	54.2134
YBR201W::chr2_4:dn	23.0933	13.4946	22.2275
YBR202W::chr2_4:dn	789.57	593.221	665.74
YBR203W::chr2_4:dn	850.052	953.796	898.316
YBR204C::chr2_4:dn	281.518	370.831	268.356
YBR205W::chr2_4:dn	899.538	1041.78	1050.11
YBR206W::chr2_4:dn	911.634	1008.31	979.636
YBR207W::chr2_4:dn	767.576	904.676	993.189
YBR208C::chr2_4:dn	182.547	328.188	287.331
YBR209W::chr2_4:dn	932.528	1036.92	1134.14
YBR210W::chr2_4:dn	951.222	1013.71	803.985
YBR211C::chr2_4:dn	792.869	877.147	826.754
YBR212W::chr2_4:dn	1122.77	792.941	1129.26
YBR213W::chr2_4:dn	900.637	553.277	739.471
YBR214W::chr2_4:dn	37.3891	62.6148	103.548
YBR215W::chr2_4:dn	530.045	838.283	713.448
YBR216C::chr2_4:dn	76.9775	57.217	49.8763
YBR217W::chr2_4:dn	1091.98	1115.19	1118.96
YBR218C::chr2_4:dn	1181.06	1148.12	1121.68
YBR219C::chr2_4:dn	1152.46	1694.92	1676.82
YBR220C::chr2_4:dn	1155.76	1386.16	1379.73
YBR221C::chr2_4:dn	890.74	1510.31	1077.76
YBR222C::chr2_4:dn	599.325	770.27	725.917
YBR223C::chr2_4:dn	812.663	758.395	1379.19
YBR224W::chr2_4:dn	824.759	790.782	685.799
YBR225W::chr2_4:dn	461.865	656.376	458.103
YBR226C::chr2_4:dn	575.132	551.658	596.889
YBR227C::chr2_4:dn	541.042	568.391	592.552
YBR228W::chr2_4:dn	1198.65	1242.04	1210.04
YBR229C::chr2_4:dn	972.116	1074.71	1039.27
YBR230C::chr2_4:dn	812.663	346.001	683.631
YBR231C::chr2_4:dn	888.541	1192.38	931.386
YBR232C::chr00_8:dn	218.836	448.02	359.977
YBR233W::chr2_4:dn	1024.9	917.631	750.313
YBR234C::chr2_4:dn	719.19	654.217	802.9
YBR235W::chr2_4:dn	932.528	1216.67	820.249
YBR236C::chr2_4:dn	519.049	974.308	742.723
YBR237W::chr2_4:dn	1190.95	1204.26	1259.38
YBR238C::chr2_4:dn	1062.29	964.052	892.895
YBR239C::chr2_4:dn	1336.11	1142.72	991.563
YBR240C::chr2_4:dn	1018.3	742.741	1001.86
YBR241C::chr2_4:dn	1282.23	1167.01	1263.71
YBR242W::chr2_4:dn	575.132	632.625	814.285
YBR243C::chr2_4:dn	1133.77	1391.02	1155.29
YBR244W::chr2_4:dn	1436.18	1373.75	1309.8
YBR245C::chr2_4:dn	1244.84	987.263	1078.85
YBR246W::chr2_4:dn	685.1	770.81	765.493
YBR247C::chr2_4:dn	920.431	989.962	736.76
YBR248C::chr2_4:dn	629.016	669.331	988.852
YBR249C::chr2_4:dn	1174.46	920.33	661.945
YBR250W::chr2_4:dn	985.312	1159.45	802.358
YBR251W::chr2_4:dn	875.345	907.375	1062.58
YBR252W::chr2_4:dn	1075.49	887.943	833.802
YBR253W::chr2_4:dn	807.164	892.261	912.953
YBR254C::chr2_4:dn	1123.87	1061.75	916.748
YBR255W::chr2_4:dn	1071.09	1052.04	1335.82
YBR256C::chr2_4:dn	1122.77	1327.33	1331.48
YBR257W::chr2_4:dn	769.775	647.2	254.261
YBR258C::chr2_4:dn	3.29904	9.17631	9.21628
YBR259W::chr2_4:dn	971.017	1173.49	1332.57
YBR260C::chr2_4:dn	820.361	1296.02	1272.39
YBR261C::chr2_4:dn	1530.75	607.256	7.04774
YBR262C::chr2_4:dn	6.59807	13.4946	8.67414
YBR263W::chr2_4:dn	1374.6	1583.72	1598.75
YBR264C::chr2_4:dn	1297.62	1357.55	1090.77
YBR265W::chr2_4:dn	362.894	534.925	244.502
YBR266C::chr2_4:dn	688.399	1126.53	1015.96
YBR267W::chr2_4:dn	125.363	218.612	116.017
YBR268W::chr2_4:dn	1463.67	1827.7	1705.55
YBR269C::chr00_1:dn	20.8939	15.1139	15.7219
YBR270C::chr00_16a:dn	1389.99	1192.92	1156.91
YBR271W::chr00_1:dn	8.79743	11.3354	8.67414
YBR272C::chr00_16a:dn	1173.36	1131.38	956.866
YBR275C::chr00_16a:dn	8.79743	7.55696	9.21628
YBR276C::chr00_16a:dn	1047.99	861.493	767.662
YBR277C::chr00_1:dn	1185.45	1084.42	869.041
YBR278W::chr00_1:dn	150.656	103.099	79.6937
YBR279W::chr00_1:dn	31.8907	18.8924	39.0336
YBR281C::chr00_1:dn	76.9775	34.0063	63.9718
YBR282W::chr00_1:dn	19.7942	12.9548	15.7219
YBR283C::chr00_1:dn	38.4888	17.8128	29.8174
YBR284W::chr00_1:dn	614.721	499.299	516.654
YBR286W::chr00_1:dn	10.9968	4.85805	6.50561
YBR287W::chr00_16a:dn	1229.44	951.637	1056.62
YBR288C::chr00_16a:dn	1286.62	1441.22	1427.44
YBR289W::chr00_16a:dn	18.6945	15.1139	21.6854
YBR293W::chr00_1:dn	52.7846	73.9502	70.4774
YBR294W::chr00_16a:dn	1085.38	1077.41	968.251
YBR295W::chr00_1:dn	10.9968	5.39783	11.9269
YBR297W::chr00_1:dn	932.528	705.496	577.373
YBR298C::chr00_1:dn	497.055	485.265	440.213
YBR300C::chr00_1:dn	271.621	8.09674	6.50561
YBR301W::chr00_16a:dn	1068.89	1279.83	1309.8
YCL001W-A::chr00_1:dn	1426.28	1138.4	867.956
YCL001W::chr3_1:dn	1926.64	2019.33	2029.75
YCL002C::chr3_1:dn	1088.68	859.334	833.26
YCL003W::chr3_1:dn	883.042	948.938	803.985
YCL004W::chr3_1:dn	1254.73	1172.41	1289.74
YCL005W::chr3_1:dn	588.328	634.785	693.931
YCL006C::chr3_1/chr00_12:dn	1000.71	1171.33	973.672
YCL007C::chr3_1:dn	652.11	696.86	881.51
YCL008C::chr3_1:dn	1079.88	987.263	946.024
YCL009C::chr3_1:dn	9.89711	16.1935	13.0112
YCL010C::chr3_1:dn	495.955	863.113	728.628
YCL011C::chr3_1:dn	16.4952	25.3698	29.8174
YCL012W::chr3_1:dn	1449.38	991.041	938.434
YCL013W::chr3_1:dn	1645.12	1502.76	1440.99
YCL014W::chr3_1:dn	629.016	668.251	599.058
YCL016C::chr3_1:dn	1037	1141.64	1279.44
YCL017C::chr3_1:dn	777.473	1014.79	906.99
YCL022C::chr00_12:dn	45.0868	76.1094	204.927
YCL023C::chr3_1/chr00_12:dn	1779.28	1714.89	1642.67
YCL024W::chr3_1:dn	911.634	908.994	834.886
YCL025C::chr3_1:dn	6.59807	14.0344	15.1797
YCL026C-A::chr00_16a:dn	864.348	1019.11	1209.5
YCL026C::chr3_1:dn	1602.23	1410.99	1323.35
YCL027W::chr3_1:dn	775.274	853.397	909.701
YCL028W::chr3_1:dn	668.605	719.53	647.85
YCL029C::chr3_1:dn	630.116	981.325	1148.78
YCL030C::chr3_1:dn	510.251	620.75	776.336
YCL032W::chr3_1:dn	833.557	912.233	1035.48
YCL033C::chr3_1:dn	909.435	1018.57	938.434
YCL034W::chr3_1:dn	1117.27	857.175	1085.89
YCL035C::chr00_11:dn	7.69775	5.39783	7.58987
YCL036W::chr3_1:dn	543.241	787.543	651.645
YCL037C::chr3_1:dn	123.164	153.838	43.9128
YCL038C::chr00_12:dn	8.79743	21.5913	44.9971
YCL039W::chr3_1:dn	1360.3	1099.54	1200.28
YCL040W::chr3_1:dn	226.534	423.729	407.685
YCL041C::chr00_11:dn	8.79743	6.47739	8.67414
YCL041C::chr3_1:dn	730.187	783.225	768.746
YCL042W::chr3_1:dn	478.36	687.143	680.92
YCL043C::chr3_1:dn	513.55	791.322	580.625
YCL044C::chr3_1:dn	808.264	962.973	875.546
YCL045C::chr3_1:dn	663.107	835.044	786.094
YCL046W::chr3_1:dn	16.4952	20.5117	56.3819
YCL047C::chr3_1:dn	925.93	1048.26	962.288
YCL048W::chr3_1:dn	516.849	1042.86	735.676
YCL049C::chr3_1:dn	996.309	984.564	825.128
YCL050C::chr3_1:dn	1404.29	1741.88	1302.21
YCL051W::chr3_1:dn	1116.17	887.403	1037.64
YCL053C::chr3_1:dn	616.92	558.135	473.825
YCL054W::chr3_1:dn	478.36	610.494	462.982
YCL055W::chr3_1:dn	800.566	1009.93	1032.77
YCL056C::chr3_1:dn	1131.57	1085.5	1155.83
YCL057W::chr3_1:dn	577.332	639.643	777.42
YCL058C::chr00_12:dn	464.065	871.749	917.291
YCL059C::chr3_1:dn	956.721	1062.29	1138.48
YCL060C::chr3_1:dn	1482.37	1815.29	1783.62
YCL061C::chr3_1:dn	1149.16	1123.29	1116.25
YCL062W::chr3_1:dn	1277.83	1252.3	1215.46
YCL063W::chr3_1:dn	1227.24	979.166	999.695
YCL064C::chr3_1:dn	785.171	859.874	825.128
YCL069W::chr3_1:dn	910.534	1083.34	1030.05
YCL075W::chr00_12:dn	1144.77	1263.63	1300.04
YCL076W::chr00_12:dn	957.821	1319.23	1216.55
YCR001W::chr3_1:dn	34.0901	25.3698	24.9382
YCR002C::chr3_1:dn	1047.99	737.883	578.999
YCR003W::chr3_1:dn	16.4952	26.4494	41.7443
YCR004C::chr3_1:dn	1263.53	1052.04	1327.14
YCR005C::chr3_1:dn	850.052	1076.33	917.833
YCR006C::chr3_1:dn	813.763	628.307	507.437
YCR007C::chr3_1:dn	721.39	887.403	894.521
YCR008W::chr3_1:dn	659.807	482.566	438.044
YCR009C::chr3_1:dn	845.653	925.727	712.364
YCR010C::chr3_1:dn	1031.5	959.734	963.372
YCR011C::chr3_1:dn	609.222	897.119	737.844
YCR012W::chr00_11:dn	278.219	269.352	235.828
YCR012W::chr3_1:dn	1052.39	1016.41	1025.72
YCR013C::chr00_11:dn	4.39872	5.39783	6.50561
YCR013C::chr3_1:dn	15.3955	7.55696	8.67414
YCR014C::chr3_1:dn	730.187	763.253	830.549
YCR015C::chr3_1:dn	1005.11	1045.02	996.984
YCR016W::chr3_1:dn	1251.43	1440.14	1361.84
YCR017C::chr3_1:dn	1368	1825.55	1489.24
YCR019W::chr3_1:dn	262.823	511.714	576.288
YCR020C-A::chr3_1:dn	784.071	1163.77	928.133
YCR020C::chr3_1:dn	1166.76	1258.77	1306.54
YCR020W-B::chr00_1:dn	658.708	458.276	471.656
YCR021C::chr3_1:dn	990.811	1174.03	1110.83
YCR022C::chr3_1:dn	1561.54	1254.46	1314.67
YCR023C::chr3_1:dn	1370.2	1191.3	1099.99
YCR024C-A::chr00_1:dn	7.69775	7.01718	6.50561
YCR025C::chr00_1:dn	49.4856	43.1826	58.5505
YCR026C::chr00_1:dn	697.197	984.024	567.614
YCR028C-A::chr00_16a:dn	687.299	721.69	692.305
YCR028C::chr00_1:dn	553.139	511.714	555.687
YCR030C::chr00_16a:dn	102.27	101.479	108.427
YCR031C::chr00_1:dn	1123.87	1197.78	1056.62
YCR032W::chr00_16a:dn	872.046	961.353	897.232
YCR033W::chr00_16a:dn	5.4984	3.77848	5.96347
YCR034W::chr00_1:dn	779.672	394.041	718.327
YCR036W::chr00_1:dn	179.248	130.088	184.326
YCR037C::chr00_1:dn	12.0965	4.85805	9.21628
YCR044C::chr00_1:dn	522.348	383.786	309.558
YCR045C::chr00_1:dn	7.69775	6.47739	5.96347
YCR046C::chr00_16a:dn	98.9711	68.5524	73.1881
YCR047C::chr00_16a:dn	19.7942	14.0344	19.5168
YCR048W::chr00_16a:dn	1245.94	1435.28	1141.73
YCR049C::chr00_1:dn	1096.38	904.676	763.325
YCR050C::chr00_1:dn	868.747	693.081	683.089
YCR051W::chr00_1:dn	1386.7	1162.69	1540.2
YCR052W::chr00_1:dn	356.296	236.965	126.317
YCR053W::chr00_16a:dn	25.2926	17.8128	25.4803
YCR057C::chr00_16a:dn	6.59807	3.2387	8.67414
YCR059C::chr00_1:dn	51.6849	43.7224	110.595
YCR060W::chr00_16a:dn	1659.42	1790.46	1857.89
YCR061W::chr00_1:dn	4.39872	7.01718	4.33707
YCR062W::chr00_16a:dn	890.74	964.052	855.487
YCR063W::chr00_1:dn	21.9936	11.3354	13.5533
YCR064C::chr00_16a:dn	57.1833	62.075	74.2723
YCR066W::chr00_1:dn	2.19936	12.415	16.8062
YCR071C::chr00_1:dn	12.0965	3.77848	4.87921
YCR072C::chr00_16a:dn	1171.16	928.966	982.889
YCR073C::chr00_16a:dn	73.6785	214.294	240.165
YCR073W-A::chr00_1:dn	50.5852	22.1311	31.9859
YCR075C::chr00_16a:dn	7.69775	3.77848	7.04774
YCR076C::chr00_1:dn	89.074	50.7396	73.7302
YCR077C::chr00_1:dn	274.92	276.909	250.466
YCR079W::chr00_1:dn	665.306	408.076	458.103
YCR081W::chr00_1:dn	467.364	594.841	360.519
YCR083W::chr00_16a:dn	982.013	825.868	847.897
YCR084C::chr00_16a:dn	1023.8	716.832	705.858
YCR085W::chr00_1:dn	92.373	57.217	44.455
YCR086W::chr00_1:dn	149.556	178.128	164.809
YCR087C-A::chr00_1:dn	642.213	598.079	517.196
YCR088W::chr00_16a:dn	677.402	682.285	633.755
YCR092C::chr00_2:dn	3.29904	290.943	265.103
YCR093W::chr00_2:dn	10.9968	8.09674	1.08427
YCR094W::chr00_2:dn	657.608	523.589	570.867
YCR098C::chr00_2:dn	38.4888	36.1654	54.7555
YCR100C::chr00_2:dn	560.836	520.89	404.974
YCR102W-A::chr00_14:dn	1651.72	1284.14	1503.88
YCR105W::chr00_2:dn	28.5917	9.71609	31.4438
YCR107W::chr00_17a:dn	2642.53	2614.71	2675.97
YDL002C::chr4_1:dn	875.345	952.177	691.221
YDL003W::chr4_1:dn	1649.52	1732.16	2013.49
YDL004W::chr4_1:dn	1426.28	1612.87	1470.27
YDL005C::chr4_1:dn	1493.36	1723.53	2213.53
YDL006W::chr4_1:dn	1385.6	1393.72	1320.1
YDL007W::chr4_1:dn	979.814	1091.44	1265.88
YDL008W::chr4_1:dn	1124.97	1327.87	1295.7
YDL009C::chr4_1:dn	428.875	655.296	816.454
YDL010W::chr4_1:dn	1061.19	1356.47	1278.35
YDL011C::chr4_1:dn	1362.5	1566.45	1695.79
YDL012C::chr4_1:dn	2076.19	2411.21	2243.89
YDL013W::chr4_1:dn	825.859	1154.06	976.383
YDL014W::chr4_1:dn	575.132	654.757	569.783
YDL015C::chr4_1:dn	855.55	1028.29	820.791
YDL016C::chr4_1:dn	664.206	817.231	923.254
YDL017W::chr4_1:dn	660.907	809.674	787.721
YDL018C::chr4_1:dn	1120.57	1163.77	1113
YDL019C::chr4_1:dn	845.653	781.066	765.493
YDL020C::chr4_1:dn	847.853	984.024	811.032
YDL021W::chr4_1:dn	675.203	907.915	667.909
YDL022W::chr4_1:dn	721.39	573.249	542.134
YDL023C::chr4_1:dn	1672.61	1652.81	1196.49
YDL024C::chr4_1:dn	20.8939	17.273	22.7696
YDL025C::chr4_1:dn	18.6945	23.2107	10.8427
YDL026W::chr4_1:dn	1449.38	934.904	1477.86
YDL027C::chr4_1:dn	619.119	669.331	797.479
YDL028C::chr4_1:dn	738.984	1131.92	809.406
YDL029W::chr4_1:dn	1159.06	1063.37	1121.68
YDL030W::chr4_1:dn	960.02	1183.74	781.215
YDL031W::chr00_17a:dn	2340.12	2233.08	2203.77
YDL032W::chr4_1:dn	28.5917	46.4213	34.6966
YDL033C::chr4_1:dn	1229.44	911.153	821.333
YDL034W::chr4_1:dn	874.245	920.33	755.193
YDL035C::chr4_1:dn	831.357	574.329	466.235
YDL036C::chr4_1:dn	1295.42	1142.72	1197.03
YDL037C::chr4_1:dn	1614.33	1670.09	2000.47
YDL038C::chr4_1:dn	1019.4	1298.72	969.335
YDL039C::chr4_1:dn	729.087	828.027	750.313
YDL040C::chr4_1:dn	89.074	212.674	154.508
YDL041W::chr4_1:dn	577.332	716.832	653.271
YDL043C::chr4_1:dn	802.766	677.967	612.611
YDL045W-A::chr4_1:dn	646.611	688.763	597.974
YDL046W::chr4_1:dn	1164.56	996.979	888.557
YDL047W::chr4_1:dn	2848.17	2978.52	3701.15
YDL048C::chr4_1:dn	2198.26	2088.42	2115.41
YDL049C::chr4_1:dn	6.59807	7.55696	8.13201
YDL050C::chr4_1:dn	938.026	1040.7	723.749
YDL051W::chr4_1:dn	767.576	1013.17	879.883
YDL052C::chr4_1:dn	740.084	894.42	707.485
YDL053C::chr4_1:dn	699.396	865.272	763.867
YDL054C::chr4_1:dn	39.5884	41.5633	79.1515
YDL055C::chr4_1:dn	614.721	824.788	869.041
YDL056W::chr4_1:dn	1668.21	1253.92	1187.27
YDL057W::chr4_1:dn	9.89711	12.415	10.8427
YDL058W::chr00_17a:dn	2379.71	1960.49	2074.2
YDL059C::chr4_1:dn	1708.9	1718.67	1487.07
YDL060W::chr4_1:dn	620.219	1041.78	1004.57
YDL061C::chr4_1:dn	851.152	974.308	662.488
YDL062W::chr4_1:dn	781.872	866.891	1019.21
YDL063C::chr4_1:dn	710.393	895.5	942.229
YDL064W::chr4_1:dn	1524.16	1715.43	1835.67
YDL065C::chr4_1:dn	531.145	640.182	751.94
YDL066W::chr4_1:dn	1260.23	1276.59	1065.29
YDL067C::chr4_1:dn	1463.67	1524.35	1524.48
YDL068W::chr4_1:dn	855.55	1072.01	934.097
YDL069C::chr4_1:dn	126.463	133.326	119.269
YDL070W::chr4_1:dn	1748.49	1447.7	1763.56
YDL071C::chr4_1:dn	1534.05	1557.81	1415.51
YDL072C::chr4_1:dn	1433.98	1750.52	1372.14
YDL073W::chr4_1:dn	1351.51	1196.16	1163.42
YDL074C::chr4_1:dn	591.627	804.816	655.982
YDL075W::chr4_1:dn	1172.26	1209.65	1527.19
YDL076C::chr4_1:dn	1525.25	1307.89	1121.68
YDL077C::chr4_1:dn	0	0.539783	5.96347
YDL078C::chr4_1:dn	1047.99	971.069	1036.02
YDL079C::chr4_1:dn	1218.44	1164.85	986.684
YDL080C::chr4_1:dn	1044.7	1100.08	1072.34
YDL081C::chr4_1:dn	1006.21	1050.96	895.605
YDL082W::chr4_1:dn	624.618	776.747	575.204
YDL083C::chr4_1:dn	9.89711	8.63652	3.79494
YDL085W::chr4_1:dn	1133.77	1125.45	1192.69
YDL086W::chr4_1:dn	1068.89	972.149	1039.81
YDL087C::chr4_1:dn	146.257	453.957	318.775
YDL088C::chr4_1:dn	17.5949	16.1935	11.9269
YDL089W::chr4_1:dn	623.518	1020.73	807.78
YDL090C::chr4_1:dn	908.335	1048.8	815.912
YDL091C::chr4_1:dn	1195.35	856.096	914.038
YDL093W::chr4_1:dn	870.946	925.727	796.937
YDL094C::chr4_1:dn	25.2926	43.7224	23.3118
YDL095W::chr4_1:dn	1303.12	1650.66	1345.58
YDL096C::chr4_2:dn	1308.62	1324.63	1377.02
YDL097C::chr4_2:dn	1108.48	948.938	1220.34
YDL098C::chr4_2:dn	660.907	1181.04	876.631
YDL099W::chr4_2:dn	1133.77	806.435	895.063
YDL100C::chr4_2:dn	1372.4	1161.61	1137.94
YDL101C::chr4_2:dn	967.718	1032.06	842.476
YDL102W::chr4_2:dn	1284.43	862.033	1001.32
YDL103C::chr4_2:dn	809.364	985.643	838.681
YDL104C::chr4_2:dn	725.788	909.534	647.85
YDL105W::chr4_2:dn	825.859	1026.67	975.841
YDL106C::chr4_2:dn	536.643	870.67	751.94
YDL107W::chr4_2:dn	1827.67	1749.98	1327.14
YDL108W::chr4_2:dn	971.017	929.506	1064.21
YDL109C::chr4_2:dn	487.158	538.703	678.752
YDL110C::chr4_2:dn	873.145	1168.63	1085.35
YDL111C::chr4_2:dn	385.987	723.309	599.058
YDL112W::chr4_2:dn	927.03	1041.24	692.847
YDL113C::chr4_2:dn	658.708	783.225	902.111
YDL114W::chr4_2:dn	1346.01	986.183	1063.12
YDL115C::chr4_2:dn	662.007	1122.21	1057.7
YDL116W::chr4_2:dn	716.991	618.591	766.035
YDL117W::chr4_2:dn	785.171	699.558	775.251
YDL118W::chr4_2:dn	878.644	1067.69	915.664
YDL119C::chr4_2:dn	1603.33	1481.7	1649.71
YDL120W::chr4_2:dn	1492.26	1300.34	1493.58
YDL121C::chr4_2:dn	854.451	910.074	772.541
YDL122W::chr4_2:dn	565.235	492.822	579.541
YDL123W::chr4_2:dn	1097.48	1133	717.243
YDL124W::chr4_2:dn	941.325	1012.09	1134.69
YDL125C::chr4_2:dn	543.241	522.51	406.058
YDL126C::chr4_2:dn	922.631	1202.64	1243.66
YDL127W::chr4_2:dn	862.148	787.003	786.636
YDL128W::chr4_2:dn	580.631	812.373	709.653
YDL129W::chr4_2:dn	1041.4	943.54	1116.25
YDL130W-A::chr00_2:dn	197.942	284.466	341.544
YDL130W::chr4_2:dn	530.045	707.115	550.808
YDL131W::chr4_2:dn	1214.05	975.388	849.524
YDL132W::chr4_2:dn	942.425	864.192	880.968
YDL133C-A::chr00_14:dn	40.6881	18.3526	25.4803
YDL133W::chr4_2:dn	694.997	843.141	900.484
YDL134C-A::chr4_2:dn	968.817	985.104	825.67
YDL134C::chr4_2:dn	942.425	862.033	1037.64
YDL135C::chr4_2:dn	755.48	623.449	569.783
YDL136W::chr4_2:dn	736.785	713.053	676.583
YDL137W::chr4_2:dn	907.235	1053.12	1182.39
YDL138W::chr4_2:dn	1063.39	1016.41	1128.18
YDL139C::chr4_2:dn	713.692	554.357	604.479
YDL140C::chr4_2:dn	845.653	853.397	1051.2
YDL141W::chr4_2:dn	909.435	1002.92	986.684
YDL142C::chr4_2:dn	943.525	923.029	999.695
YDL143W::chr4_2:dn	488.258	318.472	184.326
YDL144C::chr4_2:dn	134.161	292.562	121.98
YDL145C::chr4_2:dn	28.5917	15.6537	14.6376
YDL146W::chr4_2:dn	1035.9	1099.54	1345.58
YDL147W::chr4_2:dn	975.415	1117.35	1129.81
YDL148C::chr4_2:dn	1176.66	810.214	880.425
YDL149W::chr4_2:dn	874.245	879.846	570.325
YDL150W::chr4_2:dn	536.643	250.459	266.188
YDL151C::chr4_2:dn	714.791	785.384	493.342
YDL152W::chr4_2:dn	601.524	563.533	374.615
YDL153C::chr4_2:dn	785.171	635.324	989.394
YDL154W::chr4_2:dn	1608.83	1829.86	1850.85
YDL155W::chr4_2:dn	1135.97	849.618	1135.77
YDL156W::chr4_2:dn	1015	1209.11	1236.61
YDL157C::chr4_2:dn	868.747	1035.84	1058.25
YDL158C::chr4_2:dn	910.534	768.651	748.687
YDL159W::chr4_2:dn	758.779	986.723	1266.97
YDL160C::chr4_2:dn	965.518	784.844	693.931
YDL161W::chr4_2:dn	609.222	942.461	753.024
YDL162C::chr4_2:dn	947.923	943.54	858.198
YDL163W::chr4_2:dn	1002.91	794.56	618.575
YDL164C::chr4_2:dn	962.219	985.104	719.954
YDL165W::chr4_2:dn	502.553	547.34	514.485
YDL166C::chr4_2:dn	1366.9	1178.89	1361.3
YDL167C::chr4_2:dn	1131.57	1010.47	1085.35
YDL168W::chr4_2:dn	32.9904	39.4041	23.3118
YDL169C::chr4_2:dn	886.341	922.489	1004.03
YDL170W::chr4_2:dn	697.197	569.471	828.381
YDL171C::chr4_2:dn	112.167	43.1826	22.2275
YDL172C::chr4_2:dn	635.615	709.814	474.367
YDL173W::chr4_2:dn	631.216	458.276	573.578
YDL174C::chr4_2:dn	377.19	611.574	497.679
YDL175C::chr4_2:dn	19.7942	19.4322	23.8539
YDL176W::chr4_2:dn	742.283	680.666	740.013
YDL177C::chr4_2:dn	651.01	1037.46	959.035
YDL178W::chr4_2:dn	721.39	989.422	861.993
YDL179W::chr4_2:dn	858.849	825.328	962.83
YDL180W::chr4_2:dn	989.711	1015.87	1075.59
YDL181W::chr4_2:dn	693.898	552.738	571.951
YDL182W::chr4_2:dn	747.782	696.86	755.193
YDL184C::chr4_2:dn	1089.78	887.943	861.451
YDL185W::chr4_2:dn	1105.18	906.295	1011.62
YDL186W::chr4_2:dn	1248.14	1002.92	1084.81
YDL187C::chr4_2:dn	1370.2	960.813	906.99
YDL188C::chr4_2:dn	27.492	47.5009	67.7667
YDL189W::chr4_2:dn	40.6881	84.7459	79.1515
YDL190C::chr4_2:dn	1121.67	1517.87	1849.76
YDL191W::chr4_3:dn	535.544	288.784	320.943
YDL192W::chr4_3:dn	8.79743	15.1139	6.50561
YDL193W::chr4_3:dn	171.55	113.354	31.9859
YDL194W::chr00_16b:dn	1238.24	1490.34	1117.88
YDL195W::chr4_3:dn	577.332	617.512	674.957
YDL196W::chr4_3:dn	592.727	544.641	588.757
YDL197C::chr4_3:dn	644.412	529.527	525.328
YDL198C::chr4_3:dn	6.59807	17.8128	14.0955
YDL199C::chr4_3:dn	5.4984	8.09674	5.96347
YDL200C::chr4_3:dn	425.576	599.159	522.075
YDL201W::chr4_3:dn	700.496	739.502	613.696
YDL202W::chr4_3:dn	779.672	878.766	1168.3
YDL203C::chr4_3:dn	548.74	608.875	578.457
YDL204W::chr4_3:dn	382.688	540.862	577.915
YDL205C::chr4_3:dn	657.608	944.62	508.522
YDL206W::chr4_3:dn	536.643	594.841	467.319
YDL207W::chr4_3:dn	142.958	239.664	249.924
YDL208W::chr4_3:dn	1068.89	941.381	1026.26
YDL209C::chr4_3:dn	656.508	442.082	434.249
YDL210W::chr4_3:dn	594.926	892.801	619.659
YDL211C::chr4_3:dn	669.705	702.257	880.968
YDL212W::chr4_3:dn	307.91	338.444	413.106
YDL214C::chr4_3:dn	1024.9	1259.31	1096.74
YDL215C::chr4_3:dn	1062.29	1182.12	1346.12
YDL216C::chr4_3:dn	476.161	493.361	438.586
YDL217C::chr4_3:dn	778.573	855.016	699.353
YDL218W::chr4_3:dn	996.309	833.964	892.895
YDL219W::chr4_3:dn	536.643	659.075	631.586
YDL220C::chr4_3:dn	153.955	358.416	242.876
YDL221W::chr4_3:dn	521.248	611.034	474.909
YDL222C::chr4_3:dn	841.255	784.844	879.883
YDL223C::chr4_3:dn	9.89711	17.273	18.9747
YDL224C::chr4_3:dn	536.643	467.992	410.937
YDL225W::chr4_3:dn	385.987	492.282	444.008
YDL226C::chr4_3:dn	1382.3	1274.43	1268.59
YDL227C::chr4_3:dn	996.309	777.827	782.299
YDL229W::chr4_3:dn	1017.2	819.39	992.105
YDL230W::chr4_3:dn	466.264	5.39783	11.9269
YDL231C::chr4_3:dn	765.377	427.508	426.117
YDL232W::chr4_3:dn	611.422	479.867	452.14
YDL233W::chr4_3:dn	511.351	454.497	521.533
YDL234C::chr4_3:dn	483.859	659.615	659.777
YDL235C::chr4_3:dn	376.09	424.269	410.937
YDL236W::chr4_3:dn	633.415	595.92	552.434
YDL237W::chr4_3:dn	528.946	573.249	679.836
YDL238C::chr4_3:dn	588.328	672.569	562.735
YDL239C::chr4_3:dn	978.714	887.943	771.457
YDL240W::chr4_3:dn	966.618	730.326	562.735
YDL241W::chr4_3:dn	34.0901	23.7504	28.7331
YDL242W::chr4_3:dn	611.422	912.773	796.937
YDL243C::chr4_3:dn	14.2958	3.2387	5.42134
YDR001C::chr4_3:dn	557.537	464.753	286.789
YDR002W::chr4_3:dn	409.081	497.14	1.6264
YDR003W::chr4_3:dn	704.894	582.426	557.856
YDR004W::chr4_3:dn	836.856	1038	1003.49
YDR005C::chr4_3:dn	190.244	187.844	181.073
YDR006C::chr4_3:dn	656.508	992.121	831.633
YDR007W::chr00_16b:dn	619.119	729.247	729.17
YDR008C::chr4_3:dn	1756.19	1391.02	1581.95
YDR009W::chr4_3:dn	1124.97	945.699	1194.32
YDR010C::chr4_3:dn	563.036	479.327	558.398
YDR011W::chr4_3:dn	559.737	657.455	697.726
YDR013W::chr4_3:dn	552.039	612.114	615.322
YDR014W::chr4_3:dn	753.28	706.036	608.274
YDR015C::chr4_3:dn	438.772	533.845	442.381
YDR016C::chr4_3:dn	635.615	643.421	458.645
YDR017C::chr4_3:dn	643.312	832.345	843.56
YDR018C::chr4_3:dn	38.4888	131.707	227.154
YDR019C::chr4_3:dn	626.817	851.237	1132.52
YDR020C::chr4_3:dn	638.914	774.588	721.038
YDR021W::chr4_3:dn	1346.01	1206.41	1490.33
YDR022C::chr4_3:dn	561.936	799.418	523.701
YDR023W::chr4_3:dn	953.422	799.958	632.128
YDR024W::chr4_3:dn	473.962	460.435	472.199
YDR025W::chr4_3:dn	309.01	273.67	250.466
YDR026C::chr4_3:dn	665.306	862.033	949.819
YDR028C::chr4_3:dn	912.734	884.704	1034.39
YDR029W::chr4_3:dn	439.872	349.239	458.103
YDR030C::chr4_3:dn	390.386	553.817	468.946
YDR031W::chr4_3:dn	1035.9	889.022	908.616
YDR032C::chr4_3:dn	931.428	939.222	893.437
YDR033W::chr4_3:dn	612.521	454.497	279.199
YDR035W::chr4_3:dn	686.2	476.628	497.679
YDR036C::chr4_3:dn	1198.65	791.861	998.611
YDR037W::chr4_3:dn	747.782	822.629	668.993
YDR041W::chr00_16b:dn	881.943	927.347	892.352
YDR042C::chr4_3:dn	995.21	1086.58	1069.63
YDR043C::chr4_3:dn	1267.93	1478.47	1452.92
YDR044W::chr4_3:dn	51.6849	98.2405	132.823
YDR045C::chr4_3:dn	30.791	68.5524	63.9718
YDR046C::chr4_3:dn	1548.35	1193.46	1095.65
YDR047W::chr4_3:dn	550.939	490.123	498.221
YDR048C::chr00_16b:dn	949.023	1123.29	1142.28
YDR049W::chr4_4:dn	1166.76	1038	831.091
YDR050C::chr00_11:dn	873.145	998.598	967.709
YDR050C::chr4_4:dn	680.701	600.778	632.67
YDR051C::chr4_4:dn	1137.07	920.869	903.737
YDR052C::chr4_4:dn	611.422	630.466	603.937
YDR053W::chr4_4:dn	622.418	580.806	776.336
YDR054C::chr4_4:dn	413.479	398.899	515.027
YDR056C::chr4_4:dn	718.09	729.786	595.805
YDR057W::chr4_4:dn	431.074	334.126	394.673
YDR059C::chr4_4:dn	809.364	662.853	743.266
YDR060W::chr4_4:dn	591.627	533.845	362.688
YDR061W::chr4_4:dn	931.428	816.691	923.254
YDR062W::chr4_4:dn	1049.09	879.846	1012.16
YDR063W::chr4_4:dn	570.733	548.419	693.389
YDR064W::chr4_4:dn	439.872	272.051	334.497
YDR065W::chr4_4:dn	315.608	301.199	344.797
YDR067C::chr4_4:dn	384.888	567.312	587.131
YDR068W::chr4_4:dn	675.203	585.125	707.485
YDR069C::chr4_4:dn	482.759	272.59	311.727
YDR070C::chr4_4:dn	462.965	357.876	434.791
YDR071C::chr00_11:dn	94.5724	72.3309	67.7667
YDR072C::chr4_4:dn	348.598	315.773	376.783
YDR073W::chr4_4:dn	1237.14	1000.76	963.914
YDR074W::chr00_11:dn	1437.28	953.256	1169.92
YDR075W::chr4_4:dn	505.852	654.217	613.153
YDR076W::chr4_4:dn	577.332	799.958	819.706
YDR077W::chr4_4:dn	377.19	266.113	271.067
YDR078C::chr4_4:dn	753.28	485.265	494.968
YDR079W::chr4_4:dn	703.795	817.771	846.271
YDR080W::chr4_4:dn	711.492	575.408	562.193
YDR081C::chr4_4:dn	721.39	882.005	579.541
YDR082W::chr4_4:dn	9.89711	11.3354	17.3483
YDR083W::chr4_4:dn	265.023	234.266	309.558
YDR084C::chr4_4:dn	420.077	392.962	351.845
YDR085C::chr4_4:dn	449.769	272.051	410.395
YDR086C::chr4_4:dn	52.7846	45.8815	74.2723
YDR087C::chr4_4:dn	500.354	626.688	416.901
YDR088C::chr4_4:dn	532.245	572.17	620.743
YDR091C::chr4_4:dn	407.981	509.555	460.272
YDR092W::chr4_4:dn	531.145	741.122	699.353
YDR093W::chr4_4:dn	490.457	609.415	490.631
YDR094W::chr4_4:dn	656.508	654.217	701.521
YDR095C::chr4_4:dn	559.737	389.723	373.53
YDR096W::chr4_4:dn	477.261	441.542	331.244
YDR097C::chr4_4:dn	610.322	708.195	671.704
YDR098C::chr4_4:dn	780.772	863.652	805.611
YDR099W::chr4_4:dn	512.45	425.889	333.954
YDR100W::chr4_4:dn	94.5724	96.6211	104.632
YDR101C::chr4_4:dn	687.299	466.372	415.817
YDR102C::chr4_4:dn	677.402	589.983	546.471
YDR103W::chr4_4:dn	89.074	150.06	137.702
YDR104C::chr4_4:dn	3.29904	10.7957	9.21628
YDR105C::chr4_4:dn	583.93	681.206	529.123
YDR107C::chr4_4:dn	602.624	561.914	586.047
YDR108W::chr4_4:dn	601.524	530.067	594.179
YDR109C::chr4_4:dn	413.479	795.1	579.541
YDR110W::chr4_4:dn	511.351	404.837	476.536
YDR112W::chr4_4:dn	925.93	523.05	693.931
YDR113C::chr4_4:dn	522.348	483.645	415.275
YDR114C::chr4_4:dn	752.181	744.36	826.212
YDR115W::chr4_4:dn	245.228	314.154	366.483
YDR116C::chr4_4:dn	753.28	734.644	706.943
YDR117C::chr4_4:dn	550.939	654.757	720.496
YDR118W::chr4_4:dn	852.251	423.19	495.51
YDR119W::chr4_4:dn	1.09968	8.63652	23.3118
YDR120C::chr4_4:dn	686.2	483.106	552.434
YDR121W::chr4_4:dn	510.251	536.544	408.769
YDR122W::chr4_4:dn	6.59807	12.9548	3.79494
YDR123C::chr4_4:dn	1269.03	855.016	1131.43
YDR124W::chr4_4:dn	698.296	679.047	696.642
YDR125C::chr4_4:dn	942.425	1159.99	974.757
YDR127W::chr4_4:dn	378.29	298.5	285.162
YDR128W::chr4_4:dn	563.036	591.602	761.698
YDR130C::chr4_4:dn	445.37	323.33	340.46
YDR131C::chr4_4:dn	105.569	77.1889	37.4072
YDR132C::chr4_4:dn	69.2798	166.253	134.991
YDR133C::chr4_4:dn	733.486	775.668	609.901
YDR134C::chr4_4:dn	657.608	640.182	607.732
YDR135C::chr4_4:dn	1167.86	1260.39	1126.55
YDR136C::chr4_4:dn	842.354	785.924	832.176
YDR137W::chr4_4:dn	1030.4	1263.63	1346.12
YDR138W::chr4_4:dn	823.66	650.438	825.128
YDR139C::chr4_4:dn	1156.86	1434.2	1271.85
YDR141C::chr4_4:dn	552.039	608.875	621.285
YDR142C::chr4_4:dn	1020.5	975.927	940.06
YDR143C::chr4_4:dn	625.717	761.094	723.749
YDR144C::chr4_4:dn	186.945	267.192	2.16854
YDR145W::chr4_4:dn	37.3891	79.3481	47.7078
YDR146C::chr4_4:dn	541.042	611.034	539.423
YDR148C::chr4_5:dn	56.0836	81.5072	82.9465
YDR149C::chr4_5:dn	183.646	150.06	165.351
YDR150W::chr4_5:dn	183.646	155.997	198.421
YDR151C::chr4_5:dn	24.1929	38.8644	21.1432
YDR152W::chr4_5:dn	203.441	145.741	175.109
YDR153C::chr4_5:dn	2.19936	4.31826	8.67414
YDR156W::chr4_5:dn	78.0772	96.0813	141.497
YDR158W::chr4_5:dn	179.248	132.787	172.941
YDR161W::chr4_5:dn	114.367	61.5352	103.005
YDR162C::chr4_5:dn	63.7814	73.9502	79.1515
YDR163W::chr4_5:dn	104.47	131.167	86.1993
YDR164C::chr4_5:dn	46.1865	26.9891	20.6011
YDR165W::chr4_5:dn	135.261	123.07	130.112
YDR166C::chr4_5:dn	92.373	98.2405	79.6937
YDR167W::chr4_5:dn	97.8714	50.1998	43.3707
YDR168W::chr4_5:dn	73.6785	52.3589	94.3313
YDR169C::chr4_5:dn	140.759	140.883	148.545
YDR170C::chr4_5:dn	126.463	102.019	75.3566
YDR171W::chr4_5:dn	149.556	90.6835	92.7049
YDR172W::chr4_5:dn	15.3955	26.4494	28.7331
YDR173C::chr4_5:dn	104.47	114.434	120.896
YDR174W::chr00_14:dn	91.2734	85.2857	73.7302
YDR175C::chr4_5:dn	20.8939	13.4946	22.7696
YDR177W::chr4_5:dn	96.7718	65.8535	69.9353
YDR178W::chr4_5:dn	139.659	58.2965	69.3931
YDR179C::chr4_5:dn	117.666	84.7459	121.438
YDR179W-A::chr4_5:dn	28.5917	23.2107	17.3483
YDR180W::chr4_5:dn	16.4952	17.8128	21.6854
YDR181C::chr4_5:dn	20.8939	23.7504	14.6376
YDR182W::chr4_5:dn	27.492	26.4494	23.8539
YDR183W::chr4_5:dn	45.0868	29.1483	34.6966
YDR184C::chr4_5:dn	72.5788	36.1654	28.7331
YDR185C::chr4_5:dn	15.3955	8.63652	11.9269
YDR187C::chr4_5:dn	26.3923	17.8128	7.04774
YDR188W::chr4_5:dn	24.1929	11.8752	26.5646
YDR189W::chr4_5:dn	1.09968	4.85805	6.50561
YDR190C::chr4_5:dn	30.791	17.273	16.8062
YDR191W::chr4_5:dn	56.0836	47.5009	44.9971
YDR192C::chr4_5:dn	57.1833	55.5976	62.3454
YDR193W::chr4_5:dn	28.5917	19.972	28.191
YDR194C::chr4_5:dn	31.8907	19.972	29.8174
YDR195W::chr4_5:dn	45.0868	21.0515	37.9494
YDR196C::chr4_5:dn	84.6753	57.7568	71.5617
YDR197W::chr4_5:dn	96.7718	76.1094	81.8622
YDR198C::chr4_5:dn	144.058	91.7631	111.68
YDR199W::chr4_5:dn	37.3891	23.2107	24.396
YDR200C::chr4_5:dn	18.6945	18.3526	20.059
YDR201W::chr4_5:dn	14.2958	5.93761	6.50561
YDR202C::chr00_14:dn	182.547	147.361	170.23
YDR203W::chr4_5:dn	9.89711	11.8752	9.75841
YDR205W::chr00_14:dn	36.2894	16.1935	22.7696
YDR206W::chr4_5:dn	43.9872	30.7676	29.2752
YDR207C::chr4_5:dn	65.9807	21.5913	36.8651
YDR208W::chr4_5:dn	39.5884	28.6085	30.9016
YDR209C::chr4_5:dn	14.2958	8.09674	5.96347
YDR211W::chr4_5:dn	54.984	26.9891	29.2752
YDR212W::chr4_5:dn	9.89711	11.8752	8.67414
YDR214W::chr4_5:dn	130.862	60.9955	84.0308
YDR215C::chr4_5:dn	69.2798	51.8191	42.2864
YDR216W::chr4_5:dn	181.447	143.582	194.626
YDR218C::chr4_5:dn	23.0933	18.8924	22.7696
YDR219C::chr4_5:dn	21.9936	14.0344	9.21628
YDR220C::chr4_5:dn	9.89711	5.39783	10.8427
YDR222W::chr4_5:dn	76.9775	79.3481	89.9942
YDR223W::chr4_5:dn	34.0901	14.5741	20.6011
YDR224C::chr4_5:dn	559.737	245.061	339.376
YDR225W::chr4_5:dn	54.984	35.0859	69.9353
YDR226W::chr4_5:dn	114.367	95.5416	108.969
YDR228C::chr4_5:dn	64.8811	48.5805	60.1769
YDR229W::chr4_5:dn	203.441	148.44	151.797
YDR230W::chr4_5:dn	59.3827	28.6085	36.8651
YDR231C::chr4_5:dn	100.071	92.8426	104.632
YDR233C::chr4_5:dn	115.466	59.9159	92.1628
YDR234W::chr4_5:dn	127.563	84.2061	117.101
YDR235W::chr4_5:dn	19.7942	13.4946	12.4691
YDR236C::chr4_5:dn	40.6881	30.2278	27.6488
YDR237W::chr4_5:dn	26.3923	11.8752	16.264
YDR238C::chr4_5:dn	52.7846	19.972	28.7331
YDR239C::chr4_5:dn	157.254	71.2513	134.449
YDR240C::chr4_5:dn	17.5949	12.9548	21.6854
YDR241W::chr4_5:dn	64.8811	64.2342	7.58987
YDR242W::chr00_17a:dn	2386.3	2234.16	2444.48
YDR243C::chr4_6:dn	32.9904	22.6709	34.1544
YDR244W::chr4_6:dn	9.89711	9.17631	11.3848
YDR245W::chr4_6:dn	43.9872	21.0515	25.4803
YDR246W::chr4_6:dn	147.357	119.832	145.292
YDR247W::chr4_6:dn	63.7814	38.8644	41.7443
YDR248C::chr4_6:dn	41.7878	33.4665	21.1432
YDR249C::chr4_6:dn	60.4824	29.1483	35.7808
YDR250C::chr4_6:dn	35.1897	24.2902	27.1067
YDR251W::chr4_6:dn	23.0933	2.69891	68.3089
YDR252W::chr4_6:dn	29.6913	15.6537	15.1797
YDR253C::chr4_6:dn	20.8939	8.09674	0.542134
YDR254W::chr4_6:dn	29.6913	11.8752	21.1432
YDR255C::chr4_6:dn	37.3891	16.7333	17.8904
YDR256C::chr4_6:dn	3.29904	5.93761	6.50561
YDR257C::chr4_6:dn	23.0933	15.1139	17.8904
YDR258C::chr4_6:dn	69.2798	21.5913	27.6488
YDR259C::chr4_6:dn	30.791	21.5913	37.4072
YDR260C::chr4_6:dn	222.135	124.69	94.8734
YDR261C::chr4_6:dn	46.1865	21.0515	24.9382
YDR262W::chr4_6:dn	78.0772	49.1202	44.455
YDR263C::chr4_6:dn	17.5949	10.2559	16.264
YDR264C::chr4_6:dn	21.9936	18.3526	31.9859
YDR265W::chr4_6:dn	20.8939	13.4946	13.0112
YDR266C::chr4_6:dn	39.5884	22.6709	35.2387
YDR268W::chr4_6:dn	39.5884	14.0344	16.8062
YDR269C::chr4_6:dn	15.3955	19.972	14.0955
YDR272W::chr4_6:dn	42.8875	43.1826	38.4915
YDR273W::chr4_6:dn	101.17	54.5181	95.4156
YDR274C::chr4_6:dn	29.6913	23.2107	35.7808
YDR275W::chr4_6:dn	9.89711	7.01718	5.42134
YDR276C::chr4_6:dn	80.2766	45.8815	40.1179
YDR277C::chr4_6:dn	65.9807	44.802	55.8398
YDR278C::chr4_6:dn	70.3795	52.3589	51.5027
YDR279W::chr4_6:dn	20.8939	15.6537	27.1067
YDR282C::chr4_6:dn	4.39872	6.47739	3.79494
YDR283C::chr4_6:dn	21.9936	26.4494	21.1432
YDR284C::chr4_6:dn	42.8875	17.273	25.4803
YDR285W::chr4_6:dn	8.79743	4.31826	8.67414
YDR286C::chr4_6:dn	5.4984	5.39783	8.13201
YDR287W::chr4_6:dn	23.0933	13.4946	14.6376
YDR288W::chr4_6:dn	104.47	84.2061	78.6094
YDR289C::chr4_6:dn	106.669	116.053	97.5841
YDR292C::chr4_6:dn	20.8939	14.5741	12.4691
YDR293C::chr4_6:dn	42.8875	19.4322	21.6854
YDR294C::chr4_6:dn	133.061	108.496	93.247
YDR295C::chr4_6:dn	123.164	154.918	200.59
YDR296W::chr4_6:dn	51.6849	74.49	72.1038
YDR297W::chr4_6:dn	17.5949	16.7333	24.396
YDR299W::chr4_6:dn	89.074	79.3481	81.3201
YDR300C::chr4_6:dn	94.5724	44.802	56.9241
YDR301W::chr4_6:dn	12.0965	24.83	22.7696
YDR302W::chr4_6:dn	8.79743	13.4946	12.4691
YDR303C::chr4_6:dn	109.968	51.2794	82.4044
YDR304C::chr4_6:dn	4.39872	9.17631	4.33707
YDR305C::chr4_6:dn	10.9968	6.47739	9.75841
YDR306C::chr4_6:dn	20.8939	15.1139	24.9382
YDR307W::chr4_6:dn	95.6721	53.4385	69.9353
YDR308C::chr4_6:dn	17.5949	12.415	18.4326
YDR309C::chr4_6:dn	8.79743	5.39783	10.3005
YDR310C::chr4_6:dn	18.6945	17.8128	15.1797
YDR312W::chr4_6:dn	70.3795	70.7115	68.3089
YDR313C::chr4_6:dn	12.0965	10.7957	18.9747
YDR314C::chr4_6:dn	16.4952	8.09674	13.0112
YDR316W::chr4_6:dn	17.5949	13.4946	16.264
YDR318W::chr4_6:dn	36.2894	19.4322	23.3118
YDR319C::chr4_6:dn	5.4984	4.85805	8.67414
YDR320C::chr4_6:dn	24.1929	25.3698	29.2752
YDR321W::chr4_6:dn	24.1929	23.2107	29.2752
YDR323C::chr4_6:dn	24.1929	4.85805	16.8062
YDR324C::chr4_6:dn	81.3763	53.4385	66.6825
YDR326C::chr00_17a:dn	125.363	130.088	144.208
YDR327W::chr4_6:dn	138.56	142.503	121.438
YDR328C::chr4_6:dn	1.09968	3.77848	6.50561
YDR329C::chr4_6:dn	41.7878	9.17631	16.8062
YDR330W::chr4_6:dn	87.9743	43.7224	59.0926
YDR331W::chr4_6:dn	26.3923	17.8128	23.8539
YDR332W::chr4_6:dn	29.6913	26.9891	26.0224
YDR333C::chr4_6:dn	16.4952	9.71609	7.04774
YDR334W::chr4_6:dn	85.775	63.6944	13.5533
YDR335W::chr4_6:dn	80.2766	8.09674	2.16854
YDR337W::chr4_6:dn	7.69775	6.47739	8.13201
YDR338C::chr4_7:dn	24.1929	35.6257	38.4915
YDR340W::chr4_7:dn	19.7942	28.0687	31.4438
YDR341C::chr4_7:dn	18.6945	31.8472	33.6123
YDR346C::chr4_7:dn	5.4984	4.85805	10.3005
YDR348C::chr4_7:dn	85.775	67.4728	41.7443
YDR349C::chr4_7:dn	12.0965	7.01718	7.58987
YDR350C::chr4_7:dn	75.8779	76.6492	75.8987
YDR351W::chr4_7:dn	26.3923	9.71609	16.264
YDR352W::chr4_7:dn	97.8714	66.3933	68.3089
YDR354W::chr4_7:dn	38.4888	21.5913	27.6488
YDR355C::chr4_7:dn	49.4856	11.8752	17.8904
YDR356W::chr4_7:dn	6.59807	5.39783	9.21628
YDR357C::chr4_7:dn	47.2862	12.9548	34.6966
YDR358W::chr4_7:dn	12.0965	4.85805	4.87921
YDR359C::chr4_7:dn	4.39872	7.01718	5.42134
YDR361C::chr4_7:dn	39.5884	38.8644	52.587
YDR363W-A::chr00_2:dn	14.2958	16.7333	9.21628
YDR363W::chr4_7:dn	10.9968	2.69891	12.4691
YDR364C::chr4_7:dn	10.9968	5.39783	11.3848
YDR374C::chr4_7:dn	9.89711	5.39783	6.50561
YDR375C::chr4_7:dn	4.39872	2.69891	5.96347
YDR376W::chr4_7:dn	104.47	81.5072	100.295
YDR378C::chr4_7:dn	19.7942	21.5913	31.9859
YDR379W::chr4_7:dn	36.2894	41.0235	29.8174
YDR380W::chr4_7:dn	7.69775	9.17631	9.21628
YDR383C::chr4_7:dn	29.6913	33.4665	48.2499
YDR384C::chr4_7:dn	15.3955	3.77848	5.42134
YDR385W::chr4_7:dn	25.2926	16.7333	22.7696
YDR386W::chr4_7:dn	41.7878	40.4837	42.8286
YDR387C::chr4_7:dn	4.39872	9.17631	11.3848
YDR389W::chr4_7:dn	13.1961	8.63652	16.264
YDR390C::chr4_7:dn	2.19936	14.5741	14.0955
YDR391C::chr4_7:dn	57.1833	56.1374	48.7921
YDR392W::chr4_7:dn	41.7878	32.387	49.8763
YDR394W::chr4_7:dn	17.5949	8.09674	17.8904
YDR395W::chr4_7:dn	14.2958	9.71609	17.3483
YDR397C::chr4_7:dn	18.6945	7.55696	12.4691
YDR398W::chr4_7:dn	7.69775	9.17631	13.0112
YDR399W::chr4_7:dn	12.0965	5.39783	9.75841
YDR400W::chr4_7:dn	9.89711	5.39783	14.6376
YDR403W::chr4_7:dn	10.9968	18.8924	19.5168
YDR404C::chr4_7:dn	12.0965	14.0344	31.9859
YDR405W::chr4_7:dn	13.1961	5.93761	11.3848
YDR407C::chr4_7:dn	63.7814	56.1374	62.3454
YDR412W::chr4_7:dn	23.0933	23.2107	32.528
YDR413C::chr4_7:dn	6.59807	5.93761	6.50561
YDR419W::chr4_7:dn	12.0965	5.93761	5.42134
YDR423C::chr4_7:dn	6.59807	3.77848	7.04774
YDR426C::chr4_7:dn	19.7942	10.7957	16.8062
YDR427W::chr00_11:dn	6.59807	1.61935	5.96347
YDR427W::chr4_7:dn	16.4952	15.6537	16.264
YDR428C::chr4_7:dn	38.4888	33.4665	32.528
YDR430C::chr4_7:dn	26.3923	17.8128	21.1432
YDR431W::chr4_7:dn	51.6849	49.66	44.9971
YDR433W::chr4_7:dn	14.2958	11.8752	11.9269
YDR434W::chr4_7:dn	104.47	42.1031	72.1038
YDR435C::chr4_7:dn	38.4888	25.9096	32.528
YDR436W::chr4_7:dn	9.89711	13.4946	10.8427
YDR437W::chr4_8:dn	1377.9	1293.32	1075.59
YDR438W::chr4_8:dn	880.843	849.078	729.17
YDR439W::chr4_8:dn	1166.76	783.765	909.159
YDR440W::chr4_8:dn	1338.31	1151.36	1182.94
YDR441C::chr4_8:dn	2.19936	7.01718	4.87921
YDR443C::chr4_8:dn	803.865	695.24	594.179
YDR444W::chr00_17a:dn	13.1961	16.7333	24.396
YDR445C::chr00_14:dn	46.1865	30.2278	35.7808
YDR446W::chr4_8:dn	927.03	757.855	815.369
YDR447C::chr4_8:dn	607.023	553.817	485.752
YDR449C::chr4_8:dn	1063.39	954.876	1084.27
YDR450W::chr4_8:dn	465.164	19.4322	15.7219
YDR451C::chr4_8:dn	998.509	1202.1	771.999
YDR452W::chr4_8:dn	740.084	899.818	893.979
YDR453C::chr4_8:dn	874.245	860.954	872.293
YDR454C::chr4_8:dn	1028.2	1325.71	1090.77
YDR455C::chr4_8:dn	850.052	1099	941.144
YDR456W::chr4_8:dn	676.303	652.597	805.069
YDR457W::chr4_8:dn	276.019	239.124	301.969
YDR458C::chr4_8:dn	1086.48	1075.79	1461.59
YDR459C::chr4_8:dn	725.788	859.334	792.058
YDR460W::chr4_8:dn	1178.86	1009.93	1229.56
YDR461W::chr00_17a:dn	20.8939	31.8472	25.4803
YDR462W::chr4_8:dn	1297.62	1351.62	1013.25
YDR463W::chr4_8:dn	1613.23	1555.11	1519.06
YDR464W::chr4_8:dn	902.837	1256.61	1051.74
YDR465C::chr4_8:dn	36.2894	43.7224	49.8763
YDR466W::chr4_8:dn	1037	896.579	925.423
YDR467C::chr4_8:dn	734.586	1075.79	780.673
YDR468C::chr4_8:dn	699.396	715.752	585.505
YDR469W::chr4_8:dn	880.843	642.342	601.226
YDR470C::chr4_8:dn	223.235	137.645	148.003
YDR471W::chr4_8:dn	651.01	780.526	682.547
YDR472W::chr4_8:dn	602.624	735.184	457.561
YDR473C::chr4_8:dn	246.328	456.656	405.516
YDR474C::chr4_8:dn	612.521	934.904	843.56
YDR475C::chr4_8:dn	655.409	973.228	926.507
YDR476C::chr4_8:dn	1034.8	782.145	983.431
YDR477W::chr4_8:dn	775.274	750.298	690.136
YDR478W::chr4_8:dn	336.502	591.602	573.036
YDR479C::chr4_8:dn	1167.86	1529.2	1335.28
YDR480W::chr4_8:dn	743.383	923.568	681.462
YDR481C::chr4_8:dn	851.152	495.521	657.066
YDR482C::chr4_8:dn	1015	1233.4	962.83
YDR483W::chr4_8:dn	354.097	343.842	284.62
YDR484W::chr4_8:dn	172.65	109.036	111.137
YDR485C::chr4_8:dn	826.959	875.528	772.541
YDR486C::chr4_8:dn	1252.53	1416.93	1195.41
YDR487C::chr4_8:dn	713.692	1402.36	946.566
YDR488C::chr4_8:dn	817.062	672.569	638.634
YDR489W::chr4_8:dn	754.38	547.88	586.047
YDR490C::chr4_8:dn	10.9968	18.8924	13.0112
YDR491C::chr4_8:dn	1139.27	937.603	1028.43
YDR492W::chr4_8:dn	810.464	888.482	761.698
YDR493W::chr00_17a:dn	1247.04	1222.61	1270.76
YDR494W::chr4_8:dn	755.48	877.147	650.561
YDR495C::chr4_8:dn	1384.5	1225.31	1134.14
YDR496C::chr4_8:dn	1031.5	805.356	785.01
YDR497C::chr4_8:dn	781.872	607.795	631.586
YDR498C::chr00_17a:dn	1069.99	1351.62	854.945
YDR500C::chr00_17a:dn	15.3955	10.7957	11.9269
YDR500C::chr4_8:dn	263.923	331.966	325.28
YDR501W::chr4_8:dn	14.2958	8.63652	3.79494
YDR502C::chr00_17a:dn	1068.89	950.557	898.316
YDR503C::chr4_8:dn	1195.35	1353.24	1186.73
YDR504C::chr4_8:dn	908.335	1002.38	1018.67
YDR505C::chr4_8:dn	665.306	1047.72	1133.06
YDR506C::chr00_17a:dn	1212.95	1001.3	1213.84
YDR506C::chr4_8:dn	2.19936	9.71609	8.67414
YDR507C::chr4_8:dn	39.5884	39.4041	39.0336
YDR508C::chr4_8:dn	1009.51	1157.29	1095.11
YDR509W::chr4_8:dn	991.911	1212.89	1089.69
YDR510W::chr4_8:dn	1965.13	1822.31	1741.33
YDR511W::chr4_8:dn	1244.84	1808.27	1366.72
YDR512C::chr00_17a:dn	13.1961	7.55696	14.6376
YDR512C::chr4_8:dn	1021.6	939.762	880.425
YDR513W::chr4_8:dn	824.759	1528.13	1165.59
YDR514C::chr4_8:dn	1089.78	1110.87	1237.69
YDR515W::chr00_17a:dn	1242.64	862.033	537.255
YDR516C::chr4_8:dn	4.39872	9.71609	8.13201
YDR517W::chr4_8:dn	2366.51	2337.26	2539.9
YDR518W::chr4_8:dn	83.5756	138.184	101.379
YDR519W::chr4_8:dn	906.136	1043.94	940.602
YDR520C::chr4_8:dn	1482.37	1186.98	1138.48
YDR521W::chr4_8:dn	1173.36	1318.15	1416.6
YDR522C::chr4_8:dn	1607.73	1690.06	2256.9
YDR523C::chr4_8:dn	1946.43	1955.63	1948.43
YDR524C::chr4_8:dn	1662.71	1505.45	1724.53
YDR525W-A::chr00_2:dn	74.7782	65.8535	103.005
YDR525W::chr4_8:dn	1135.97	1113.03	983.431
YDR526C::chr00_17a:dn	1027.1	1116.27	841.934
YDR527W::chr4_8:dn	1699	1519.49	1415.51
YDR528W::chr4_8:dn	13.1961	23.7504	13.5533
YDR529C::chr4_8:dn	1557.15	1334.88	1536.41
YDR530C::chr4_8:dn	89.074	297.96	216.854
YDR531W::chr4_8:dn	1526.35	1364.57	1264.26
YDR532C::chr4_8:dn	1819.97	1728.92	1465.93
YDR533C::chr4_8:dn	1495.56	1627.45	1533.15
YDR534C::chr4_8:dn	1539.55	1726.23	1930
YDR536W::chr00_2:dn	112.167	101.479	86.7414
YDR537C::chr00_14:dn	26.3923	32.9268	30.3595
YDR538W::chr00_2:dn	119.865	66.9331	79.1515
YDR539W::chr00_2:dn	1330.61	1294.4	1007.28
YDR540C::chr00_2:dn	766.476	708.735	630.502
YDR541C::chr00_2:dn	578.431	677.427	764.409
YEL001C::chr5_2:dn	1526.35	1751.6	1843.26
YEL002C::chr5_2:dn	95.6721	66.3933	98.6684
YEL004W::chr5_2:dn	1546.15	1068.77	1179.14
YEL005C::chr5_2:dn	6.59807	5.93761	7.58987
YEL007W::chr5_2:dn	67.0804	44.2622	54.7555
YEL008W::chr5_2:dn	1099.68	1017.49	1136.85
YEL009C::chr5_2:dn	393.685	843.681	670.62
YEL010W::chr5_2:dn	5.4984	2.69891	8.67414
YEL011W::chr00_8:dn	2.19936	4.85805	8.67414
YEL014C::chr5_2:dn	490.457	649.898	629.417
YEL015W::chr5_2:dn	691.698	699.558	709.653
YEL016C::chr5_2:dn	1021.6	1093.06	880.968
YEL017C-A::chr5_2:dn	916.033	915.472	845.187
YEL017W::chr5_2:dn	897.338	920.869	1049.57
YEL018W::chr5_2:dn	802.766	1094.68	806.695
YEL019C::chr5_2:dn	775.274	946.239	818.08
YEL020C::chr5_2:dn	868.747	795.1	812.117
YEL023C::chr5_2:dn	45.0868	35.0859	206.553
YEL024W::chr5_2:dn	977.615	1305.73	1368.89
YEL025C::chr5_2:dn	1099.68	867.971	852.234
YEL026W::chr5_2:dn	382.688	463.673	584.42
YEL027W::chr5_2:dn	790.669	702.797	838.139
YEL028W::chr5_2:dn	586.129	487.964	363.772
YEL029C::chr5_2:dn	1335.01	1408.83	1274.56
YEL030W::chr5_2:dn	1119.47	1079.57	788.263
YEL031W::chr5_2:dn	945.724	835.044	951.987
YEL032W::chr5_2:dn	692.798	587.284	721.58
YEL033W::chr5_2:dn	490.457	424.269	344.255
YEL034W::chr00_8:dn	780.772	599.699	470.572
YEL035C::chr5_2:dn	952.322	747.599	766.035
YEL036C::chr5_2:dn	8.79743	7.01718	16.8062
YEL037C::chr5_2:dn	677.402	480.407	505.269
YEL039C::chr5_2:dn	16.4952	12.9548	11.3848
YEL040W::chr5_2:dn	139.659	117.133	127.401
YEL043W::chr5_2:dn	136.36	111.195	127.944
YEL045C::chr5_2:dn	1010.61	897.119	816.996
YEL046C::chr5_2:dn	498.155	507.396	658.693
YEL047C::chr5_2:dn	2139.98	1643.1	1661.64
YEL049W::chr5_2:dn	861.049	845.84	942.229
YEL050C::chr5_2:dn	247.428	156.537	190.289
YEL051W::chr5_2:dn	106.669	95.5416	72.6459
YEL052W::chr5_2:dn	1185.45	1150.28	1007.83
YEL053C::chr5_2:dn	451.968	758.395	639.176
YEL054C::chr5_2:dn	654.309	549.499	416.359
YEL055C::chr5_2:dn	265.023	194.322	208.722
YEL056W::chr5_2:dn	25.2926	15.1139	27.1067
YEL057C::chr5_2:dn	4.39872	5.39783	6.50561
YEL058W::chr5_2:dn	660.907	656.376	743.808
YEL059W::chr5_2:dn	1074.39	1151.9	967.709
YEL060C::chr5_2:dn	93.4727	95.5416	95.4156
YEL061C::chr5_2:dn	7.69775	6.47739	7.58987
YEL062W::chr5_2:dn	27.492	26.9891	15.7219
YEL063C::chr5_2:dn	510.251	342.222	441.839
YEL064C::chr5_2:dn	667.505	680.666	655.982
YEL065W::chr5_2:dn	635.615	671.49	743.266
YEL066W::chr5_2:dn	843.454	616.432	730.254
YEL067C::chr5_2:dn	999.608	796.18	786.636
YEL068C::chr5_2:dn	306.81	346.541	414.19
YEL071W::chr5_2:dn	1116.17	1317.07	1092.4
YEL072W::chr5_2:dn	136.36	104.718	112.764
YER001W::chr5_2:dn	1195.35	1008.85	1014.33
YER003C::chr5_2:dn	2218.05	1854.15	1760.31
YER005W::chr5_2:dn	1343.81	1233.4	1193.78
YER006W::chr5_2:dn	103.37	74.49	98.1262
YER007C-A::chr5_2:dn	366.193	413.474	480.873
YER007W::chr5_2:dn	21.9936	37.7848	37.9494
YER008C::chr5_2:dn	3.29904	2.69891	5.96347
YER009W::chr5_2:dn	2.19936	3.2387	6.50561
YER010C::chr5_2:dn	599.325	828.567	814.285
YER013W::chr5_2:dn	1470.27	1298.72	1491.95
YER014C-A::chr5_3:dn	14.2958	8.63652	13.5533
YER014W::chr5_2:dn	106.669	155.457	140.955
YER016W::chr5_3:dn	6.59807	5.39783	9.21628
YER017C::chr5_3:dn	20.8939	6.47739	9.21628
YER019C-A::chr5_3:dn	1495.56	1073.09	1218.17
YER019W::chr5_3:dn	179.248	175.429	142.581
YER020W::chr5_3:dn	1241.54	1164.85	1162.88
YER021W::chr5_3:dn	1354.8	1116.81	1267.51
YER022W::chr5_3:dn	1735.29	1605.85	2150.1
YER023W::chr5_3:dn	962.219	864.192	1199.74
YER024W::chr5_3:dn	1638.52	1311.13	1343.95
YER025W::chr5_3:dn	119.865	97.1609	78.6094
YER027C::chr00_11:dn	371.692	446.4	500.932
YER027C::chr5_3:dn	1075.49	1089.28	960.661
YER028C::chr5_3:dn	1185.45	991.041	1364.55
YER031C::chr00_10:dn	725.788	598.079	723.207
YER033C::chr5_3:dn	139.659	101.479	95.9577
YER034W::chr5_3:dn	743.383	722.769	579.541
YER035W::chr5_3:dn	516.849	960.274	768.204
YER036C::chr5_3:dn	1176.66	1144.88	1143.36
YER037W::chr00_11:dn	986.412	884.164	857.114
YER037W::chr5_3:dn	877.544	778.367	862.535
YER038C::chr5_3:dn	104.47	87.9846	121.438
YER038W-A::chr5_3:dn	1263.53	1217.75	1291.36
YER039C::chr5_3:dn	8.79743	9.17631	7.04774
YER041W::chr5_3:dn	117.666	81.5072	89.9942
YER042W::chr5_3:dn	1127.17	1118.43	1027.34
YER043C::chr5_3:dn	12.0965	3.77848	4.33707
YER044C-A::chr5_3:dn	898.438	908.994	1062.04
YER044C::chr5_3:dn	15.3955	11.8752	10.8427
YER045C::chr5_3:dn	7.69775	4.85805	9.75841
YER046W-A::chr5_3:dn	7.69775	3.77848	9.21628
YER046W::chr00_10:dn	50.5852	80.4276	121.438
YER047C::chr5_3:dn	1040.3	865.812	1068.55
YER048C::chr5_3:dn	512.45	701.178	583.336
YER048W-A::chr00_2:dn	113.267	63.6944	72.1038
YER049W::chr5_3:dn	1127.17	1335.42	869.041
YER050C::chr5_3:dn	30.791	22.1311	27.1067
YER051W::chr5_3:dn	589.428	699.019	904.279
YER052C::chr5_3:dn	1069.99	1054.74	978.552
YER055C::chr5_3:dn	5.4984	7.55696	5.42134
YER056C-A::chr5_3:dn	465.164	314.154	411.48
YER056C::chr5_3:dn	983.113	987.803	876.088
YER057C::chr5_3:dn	138.56	103.099	118.185
YER060W-A::chr5_3:dn	3.29904	4.31826	7.58987
YER060W::chr5_3:dn	38.4888	39.4041	28.191
YER061C::chr5_3:dn	48.3859	36.7052	48.2499
YER062C::chr5_3:dn	15.3955	8.63652	8.67414
YER063W::chr00_10:dn	470.663	690.382	769.83
YER064C::chr00_8:dn	25.2926	11.8752	19.5168
YER065C::chr5_3:dn	80.2766	49.1202	55.2977
YER066C-A::chr5_3:dn	9.89711	10.2559	15.1797
YER066W::chr00_10:dn	5.4984	4.31826	11.3848
YER067C-A::chr5_3:dn	28.5917	45.3418	43.9128
YER068W::chr5_3:dn	738.984	742.741	856.572
YER069W::chr5_3:dn	21.9936	17.8128	21.1432
YER070W::chr5_3:dn	86.8747	44.2622	63.9718
YER071C::chr5_3:dn	153.955	242.902	174.025
YER072W::chr5_3:dn	27.492	24.2902	28.7331
YER073W::chr5_3:dn	1358.1	1459.57	1234.98
YER074W::chr5_3:dn	1013.9	599.159	466.235
YER075C::chr5_3:dn	961.12	1016.95	1036.02
YER077C::chr00_8:dn	4.39872	10.7957	4.87921
YER078C::chr00_8:dn	46.1865	34.0063	36.323
YER079W::chr5_3:dn	1082.08	1134.08	1108.66
YER080W::chr5_3:dn	947.923	1079.03	1205.16
YER081W::chr5_3:dn	1027.1	826.407	783.926
YER082C::chr5_3:dn	1603.33	1105.48	981.262
YER083C::chr5_3:dn	988.612	755.156	998.068
YER084W::chr5_3:dn	1153.56	1116.81	929.76
YER085C::chr5_3:dn	812.663	1199.4	1029.51
YER086W::chr5_3:dn	581.73	346.001	506.353
YER087C-A::chr5_3:dn	97.8714	63.6944	74.2723
YER087W::chr5_3:dn	769.775	1041.78	1200.83
YER088C::chr00_8:dn	76.9775	136.565	184.868
YER089C::chr00_17a:dn	886.341	708.195	1025.18
YER090W::chr00_8:dn	769.775	756.775	707.485
YER091C-A::chr00_2:dn	820.361	690.382	616.406
YER091C::chr00_8:dn	9.89711	8.09674	10.3005
YER092W::chr00_8:dn	14.2958	3.77848	8.67414
YER093C-A::chr00_8:dn	1311.92	1268.49	1122.76
YER096W::chr00_8:dn	1071.09	1059.05	1255.04
YER097W::chr00_8:dn	415.679	469.071	550.808
YER098W::chr00_8:dn	26.3923	13.4946	16.264
YER101C::chr00_5:dn	6.59807	21.5913	17.3483
YER103W::chr00_5:dn	5.4984	6.47739	3.79494
YER104W::chr00_5:dn	47.2862	29.1483	47.1656
YER106W::chr00_5:dn	129.762	146.281	155.05
YER109C::chr00_5:dn	34.0901	14.0344	26.5646
YER110C::chr00_5:dn	1763.89	1676.03	2044.39
YER112W::chr00_5:dn	968.817	1419.09	1319.01
YER114C::chr00_5:dn	675.203	647.2	699.353
YER115C::chr00_5:dn	426.676	417.252	454.85
YER116C::chr00_5:dn	746.682	620.75	562.193
YER117W::chr00_5:dn	326.605	333.046	310.643
YER118C::chr00_5:dn	12.0965	26.9891	46.0814
YER119C-A::chr00_5:dn	784.071	592.142	727.002
YER119C::chr00_5:dn	813.763	401.059	511.232
YER120W::chr00_5:dn	654.309	723.309	896.147
YER121W::chr00_5:dn	320.007	248.84	221.733
YER122C::chr00_5:dn	1044.7	1139.48	901.569
YER123W::chr00_5:dn	87.9743	68.5524	84.0308
YER124C::chr00_5:dn	815.962	835.584	788.263
YER125W::chr00_5:dn	632.315	644.501	471.114
YER126C::chr00_5:dn	958.92	1093.06	603.395
YER127W::chr00_5:dn	48.3859	56.6772	81.8622
YER128W::chr00_5:dn	949.023	786.464	592.01
YER130C::chr00_5:dn	905.036	670.95	683.089
YER131W::chr00_5:dn	73.6785	71.7911	59.0926
YER132C::chr00_5:dn	5.4984	10.2559	13.5533
YER133W::chr00_5:dn	568.534	538.163	393.047
YER136W::chr00_5:dn	1.09968	2.69891	7.58987
YER137C::chr00_5:dn	45.0868	39.4041	40.66
YER139C::chr00_5:dn	20.8939	72.3309	299.258
YER140W::chr00_5:dn	17.5949	8.09674	15.7219
YER141W::chr00_5:dn	21.9936	12.9548	14.6376
YER142C::chr00_5:dn	517.949	537.624	594.721
YER144C::chr00_2:dn	841.255	656.376	733.507
YER145C::chr00_5:dn	70.3795	51.8191	66.1403
YER146W::chr00_5:dn	903.936	926.807	886.931
YER148W::chr00_5:dn	30.791	19.972	26.0224
YER149C::chr00_5:dn	18.6945	22.1311	15.7219
YER150W::chr00_5:dn	57.1833	49.1202	56.9241
YER151C::chr00_5:dn	2.19936	1.61935	5.96347
YER152C::chr00_5:dn	57.1833	39.9439	35.7808
YER153C::chr00_5:dn	31.8907	38.3246	52.587
YER154W::chr00_5:dn	36.2894	18.3526	16.8062
YER155C::chr00_5:dn	16.4952	17.8128	26.0224
YER156C::chr00_5:dn	767.576	788.623	666.283
YER158C::chr00_5:dn	718.09	478.248	374.615
YER159C::chr00_5:dn	52.7846	52.3589	62.8875
YER161C::chr00_5:dn	19.7942	14.5741	19.5168
YER162C::chr00_5:dn	124.264	174.89	48.7921
YER164W::chr00_5:dn	987.512	799.958	927.591
YER165W::chr00_5:dn	51.6849	36.7052	30.9016
YER166W::chr00_5:dn	18.6945	22.6709	26.0224
YER167W::chr00_5:dn	109.968	94.462	94.8734
YER168C::chr00_5:dn	50.5852	36.1654	37.4072
YER169W::chr00_5:dn	892.939	1012.09	762.782
YER170W::chr00_5:dn	29.6913	30.2278	29.8174
YER172C::chr00_5:dn	1150.26	1235.02	1227.93
YER174C::chr00_5:dn	84.6753	70.7115	68.3089
YER175C::chr00_5:dn	18.6945	26.9891	37.4072
YER176W::chr00_5:dn	722.489	815.072	672.788
YER177W::chr00_5:dn	12.0965	5.39783	5.42134
YER178W::chr00_5:dn	787.37	1280.9	1112.46
YER179W::chr00_5:dn	393.685	361.654	387.626
YER180C::chr00_5:dn	56.0836	48.0407	47.1656
YER181C::chr00_5:dn	29.6913	42.1031	46.6235
YER182W::chr00_5:dn	59.3827	21.0515	28.7331
YER184C::chr00_5:dn	177.048	131.167	156.677
YER185W::chr00_5:dn	202.341	108.496	155.05
YER186C::chr00_5:dn	549.84	718.451	399.011
YER187W::chr00_5:dn	250.727	181.907	264.561
YER188W::chr00_2:dn	426.676	324.949	177.278
YFL001W::chr00_17a:dn	95.6721	73.4105	65.0561
YFL002C::chr00_17a:dn	895.139	645.04	825.128
YFL003C::chr00_17a:dn	2047.6	1626.91	1836.21
YFL004W::chr00_17a:dn	316.708	2.69891	6.50561
YFL006W::chr6_1:dn	29.6913	8.63652	21.1432
YFL007W::chr00_17a:dn	34.0901	12.9548	20.059
YFL008W::chr6_1:dn	28.5917	42.6428	26.0224
YFL009W::chr6_1:dn	604.824	920.869	707.485
YFL010C::chr00_17a:dn	883.042	1396.42	1459.97
YFL010W-A::chr00_17a:dn	13.1961	14.0344	10.8427
YFL011W::chr6_1:dn	40.6881	7.55696	5.42134
YFL012W::chr00_17a:dn	51.6849	22.6709	31.9859
YFL013C::chr00_17a:dn	34.0901	22.1311	17.8904
YFL013W-A::chr00_15:dn	83.5756	71.2513	107.343
YFL014W::chr00_15:dn	1545.05	1120.59	1257.21
YFL016C::chr00_17a:dn	40.6881	24.83	45.5392
YFL017C::chr6_1:dn	20.8939	70.1718	74.2723
YFL018C::chr6_1:dn	1122.77	1409.37	1574.9
YFL018W-A::chr6_1:dn	90.1737	120.911	139.871
YFL019C::chr00_15:dn	28.5917	30.7676	29.8174
YFL020C::chr6_1:dn	879.743	932.205	1099.45
YFL021W::chr6_1:dn	28.5917	29.6881	50.9606
YFL023W::chr6_1:dn	9.89711	9.17631	5.42134
YFL025C::chr6_1:dn	13.1961	13.4946	12.4691
YFL026W::chr6_1:dn	977.615	781.066	906.99
YFL027C::chr6_1:dn	918.232	932.745	832.718
YFL028C::chr6_1:dn	1107.38	1032.06	1051.74
YFL029C::chr00_18:dn	2.19936	58.8363	51.5027
YFL030W::chr6_1:dn	38.4888	24.83	37.9494
YFL031W::chr6_1:dn	1296.52	828.027	1051.2
YFL032W::chr6_1:dn	1195.35	1167.01	1039.81
YFL033C::chr00_17a/chr00_18:dn	100.071	98.7803	108.969
YFL034C-A::chr00_2:dn	369.492	287.164	300.342
YFL034W::chr6_1:dn	1450.48	1687.36	1441.53
YFL035C-A::chr6_1:dn	338.701	484.185	445.092
YFL035C-B::chr6_1:dn	206.74	167.333	188.663
YFL035C::chr6_1:dn	692.798	909.534	755.193
YFL036W::chr6_1:dn	47.2862	23.7504	51.5027
YFL038C::chr6_1:dn	181.447	139.264	148.545
YFL039C::chr00_15:dn	13.1961	1.61935	1.08427
YFL040W::chr6_1:dn	5.4984	10.7957	18.4326
YFL041W::chr6_1:dn	716.991	938.142	767.119
YFL042C::chr00_15:dn	68.1801	39.9439	73.7302
YFL043C::chr6_1:dn	39.5884	22.1311	42.8286
YFL044C::chr6_1:dn	10.9968	3.77848	8.67414
YFL045C::chr6_1:dn	6.59807	9.17631	9.75841
YFL047W::chr6_1:dn	1305.32	1286.3	1443.16
YFL048C::chr6_1:dn	12.0965	7.01718	14.6376
YFL049W::chr6_1:dn	755.48	934.364	851.692
YFL050C::chr6_1:dn	400.283	588.903	549.724
YFL051C::chr6_1:dn	866.547	747.059	1792.29
YFL052W::chr6_1:dn	405.782	781.066	826.212
YFL053W::chr6_1:dn	35.1897	20.5117	56.9241
YFL054C::chr6_1:dn	8.79743	5.93761	3.2528
YFL055W::chr6_1:dn	65.9807	28.6085	46.0814
YFL056C::chr6_1:dn	898.438	1137.32	1140.11
YFL060C::chr00_18:dn	5.4984	15.6537	7.58987
YFL063W::chr00_18:dn	2.19936	4.31826	7.04774
YFR001W::chr6_1:dn	865.447	1161.61	951.445
YFR002W::chr00_18:dn	575.132	609.955	417.985
YFR003C::chr6_1:dn	24.1929	26.9891	26.5646
YFR004W::chr6_1:dn	169.351	591.602	241.25
YFR005C::chr6_1:dn	1111.78	955.955	846.813
YFR006W::chr6_1:dn	1095.28	1091.98	1186.19
YFR007W::chr6_1:dn	906.136	942.461	851.692
YFR008W::chr6_1:dn	939.126	913.312	893.437
YFR009W::chr6_1:dn	317.807	455.037	397.384
YFR011C::chr00_16b:dn	96.7718	115.514	124.691
YFR011C::chr6_1:dn	800.566	843.141	938.434
YFR012W::chr6_1:dn	1168.96	1065.53	1156.37
YFR013W::chr00_16b:dn	27.492	19.4322	22.2275
YFR013W::chr6_1:dn	8.79743	9.71609	16.264
YFR015C::chr6_1:dn	1161.26	1604.77	1347.2
YFR016C::chr6_1:dn	3.29904	3.2387	7.04774
YFR017C::chr6_1:dn	80.2766	38.8644	52.0449
YFR019W::chr00_15:dn	1734.19	1684.66	1579.24
YFR020W::chr6_1:dn	9.89711	5.93761	51.5027
YFR021W::chr6_1:dn	1012.8	1367.81	1186.73
YFR022W::chr6_1:dn	39.5884	148.44	157.761
YFR023W::chr6_1:dn	114.367	92.3029	134.449
YFR024C-A::chr6_1:dn	12.0965	5.39783	10.8427
YFR024C::chr00_15:dn	743.383	869.59	789.347
YFR026C::chr6_1:dn	50.5852	41.5633	43.9128
YFR027W::chr6_1:dn	1624.23	1778.58	1634.53
YFR028C::chr00_15:dn	23.0933	23.7504	39.5758
YFR031C-A::chr6_1:dn	1887.05	2059.81	2075.83
YFR031C::chr00_15:dn	21.9936	10.2559	13.0112
YFR032C-A::chr00_2:dn	9.89711	6.47739	6.50561
YFR032C::chr00_2:dn	1057.89	1217.21	1069.09
YFR033C::chr00_2:dn	134.161	96.6211	113.848
YFR035C::chr00_2:dn	1060.09	1073.09	1059.87
YFR036W::chr00_2:dn	968.817	1028.83	850.066
YFR037C::chr00_2:dn	133.061	98.2405	62.3454
YFR039C::chr00_14:dn	909.435	737.343	875.004
YFR040W::chr00_2:dn	40.6881	22.6709	21.1432
YFR042W::chr00_2:dn	2.19936	3.77848	9.21628
YFR043C::chr00_2:dn	17.5949	6.47739	9.21628
YFR044C::chr00_2:dn	2.19936	4.31826	9.75841
YFR045W::chr00_2:dn	96.7718	78.2685	78.6094
YFR047C::chr00_2:dn	8.79743	6.47739	7.58987
YFR048W::chr00_2:dn	725.788	897.659	783.383
YFR049W::chr00_2:dn	905.036	1179.43	1267.51
YFR050C::chr00_2:dn	105.569	58.8363	49.8763
YFR051C::chr00_2:dn	62.6817	50.7396	66.1403
YFR052W::chr00_2:dn	158.354	187.305	184.326
YFR053C::chr00_2:dn	830.258	900.358	959.035
YFR054C::chr00_2:dn	640.013	988.882	942.229
YFR055W::chr00_2:dn	745.582	1095.76	614.78
YFR056C::chr00_2:dn	1094.18	1351.62	1186.19
YFR057W::chr00_2:dn	853.351	887.403	667.367
YGL001C::chr7_1:dn	1531.85	1551.34	1680.62
YGL002W::chr7_1:dn	1241.54	1493.58	1523.4
YGL003C::chr7_1:dn	1297.62	1429.34	1640.5
YGL004C::chr7_1:dn	14.2958	10.7957	13.0112
YGL006W::chr7_1:dn	270.521	276.369	311.727
YGL007W::chr7_1:dn	135.261	317.392	292.752
YGL008C::chr7_1:dn	722.489	762.173	848.982
YGL009C::chr7_1:dn	1128.27	1192.38	1577.61
YGL010W::chr7_1:dn	846.753	905.756	1167.21
YGL011C::chr7_1:dn	691.698	1000.76	778.504
YGL013C::chr7_1:dn	1796.88	1391.56	1540.74
YGL014W::chr7_1:dn	1425.18	1296.02	997.526
YGL015C::chr7_1:dn	976.515	1119.51	1018.13
YGL016W::chr7_1:dn	859.949	914.392	1074.51
YGL017W::chr7_1:dn	1124.97	1296.56	1105.41
YGL018C::chr7_1:dn	1034.8	995.899	810.49
YGL019W::chr7_1:dn	663.107	601.318	529.665
YGL020C::chr7_1:dn	1086.48	1204.26	1163.42
YGL021W::chr7_1:dn	867.647	918.71	747.061
YGL022W::chr7_1:dn	27.492	9.17631	34.1544
YGL023C::chr7_1:dn	1098.58	812.913	749.229
YGL024W::chr7_1:dn	1891.45	1968.05	2140.89
YGL025C::chr7_1:dn	2426.99	3190.12	3062.51
YGL026C::chr7_1:dn	921.531	1625.83	1287.57
YGL027C::chr7_1:dn	753.28	876.067	792.058
YGL028C::chr7_1:dn	744.483	816.152	844.102
YGL029W::chr7_1:dn	1226.14	996.439	1137.4
YGL030W::chr7_1:dn	20.8939	23.2107	11.3848
YGL031C::chr7_1:dn	531.145	411.854	375.157
YGL032C::chr7_1:dn	7.69775	9.71609	5.96347
YGL033W::chr7_1:dn	1060.09	926.267	1002.41
YGL034C::chr7_1:dn	10.9968	17.8128	14.6376
YGL035C::chr7_1:dn	1314.12	1639.32	1785.25
YGL036W::chr7_1:dn	1602.23	2502.97	2134.38
YGL037C::chr7_1:dn	2385.2	2517.55	2481.35
YGL038C::chr7_1:dn	920.431	923.568	1116.8
YGL039W::chr7_1:dn	1104.08	1045.02	1117.88
YGL040C::chr7_1:dn	960.02	1052.04	924.338
YGL041C::chr7_1:dn	892.939	930.046	929.76
YGL042C::chr7_1:dn	744.483	832.885	676.041
YGL043W::chr7_1:dn	1097.48	834.504	1003.49
YGL044C::chr7_1:dn	941.325	891.181	1007.28
YGL045W::chr7_1:dn	1106.28	853.936	791.515
YGL046W::chr7_1:dn	1005.11	972.689	824.586
YGL047W::chr7_1:dn	745.582	733.565	662.488
YGL048C::chr7_1:dn	998.509	1451.48	1362.38
YGL049C::chr7_1:dn	1783.68	1871.97	1638.33
YGL050W::chr7_1:dn	15.3955	49.1202	26.5646
YGL051W::chr7_1:dn	571.833	618.591	501.474
YGL053W::chr7_1:dn	556.438	796.719	729.712
YGL054C::chr7_1:dn	856.65	1107.09	917.291
YGL055W::chr7_1:dn	684	802.657	634.839
YGL056C::chr7_1:dn	1252.53	931.125	857.656
YGL057C::chr7_1:dn	867.647	906.835	983.431
YGL058W::chr7_1:dn	667.505	835.584	864.161
YGL059W::chr7_1:dn	972.116	1014.79	1176.97
YGL060W::chr7_1:dn	607.023	1096.3	891.268
YGL061C::chr7_1:dn	1110.68	892.261	925.423
YGL062W::chr7_1:dn	1432.88	1704.63	1570.02
YGL063W::chr7_1:dn	153.955	314.154	255.345
YGL064C::chr7_1:dn	829.158	1039.08	1162.88
YGL065C::chr7_1:dn	991.911	1259.85	1423.64
YGL066W::chr7_1:dn	1355.9	1447.16	1214.38
YGL067W::chr7_1:dn	1322.91	1435.28	1439.91
YGL068W::chr7_1:dn	1075.49	1130.31	1216.55
YGL069C::chr7_1:dn	1045.79	979.706	1082.1
YGL070C::chr7_1:dn	1155.76	974.848	1655.68
YGL071W::chr7_1:dn	215.537	280.147	268.356
YGL072C::chr7_1:dn	246.328	500.918	436.96
YGL073W::chr7_1:dn	1060.09	956.495	1028.97
YGL074C::chr7_1:dn	2093.79	1862.79	1988.55
YGL075C::chr7_1:dn	819.261	1253.92	1087.52
YGL076C::chr7_1:dn	676.303	821.01	782.841
YGL077C::chr7_1:dn	1164.56	1258.77	1268.05
YGL078C::chr7_1:dn	403.582	692.002	806.153
YGL079W::chr7_1:dn	7.69775	8.63652	8.67414
YGL080W::chr7_1:dn	1042.5	1267.95	1056.62
YGL081W::chr7_1:dn	800.566	1051.5	1037.64
YGL082W::chr7_1:dn	1460.37	1389.4	1481.11
YGL083W::chr7_1:dn	1587.94	1490.88	1545.08
YGL084C::chr7_1:dn	1079.88	1257.69	1036.56
YGL085W::chr7_1:dn	965.518	1017.49	978.552
YGL086W::chr7_1:dn	1150.26	1119.51	1113
YGL087C::chr7_1:dn	32.9904	72.3309	65.5982
YGL088W::chr7_1:dn	1071.09	1100.62	1017.59
YGL089C::chr7_1:dn	1214.05	1187.52	1186.73
YGL090W::chr7_1:dn	1127.17	1188.6	1420.93
YGL091C::chr7_1:dn	1422.98	1456.33	1500.08
YGL092W::chr7_1:dn	1269.03	1011.01	1219.8
YGL093W::chr7_1:dn	1353.71	1202.1	1495.75
YGL094C::chr7_1:dn	1774.88	1863.87	1884.46
YGL095C::chr7_1:dn	1324.01	1285.22	1375.94
YGL096W::chr7_1:dn	910.534	972.689	757.903
YGL097W::chr7_1/chr00_17a:dn	1766.08	1293.32	1318.47
YGL098W::chr7_2:dn	612.521	804.816	766.035
YGL102C::chr7_2:dn	1123.87	853.936	938.976
YGL103W::chr7_2:dn	1111.78	965.132	922.712
YGL104C::chr7_2:dn	3.29904	3.2387	6.50561
YGL105W::chr7_2:dn	1124.97	1201.56	1114.63
YGL108C::chr7_2:dn	69.2798	38.8644	63.4297
YGL109W::chr7_2:dn	1797.98	1856.85	1644.29
YGL110C::chr7_2:dn	1127.17	891.181	1086.44
YGL111W::chr7_2:dn	593.827	659.615	664.114
YGL112C::chr7_2:dn	1278.93	928.966	886.389
YGL113W::chr7_2:dn	1469.17	1030.45	1206.25
YGL114W::chr7_2:dn	726.888	550.039	545.387
YGL115W::chr7_2:dn	1008.41	675.268	564.361
YGL116W::chr7_2:dn	2596.34	3555.55	3545.56
YGL117W::chr7_2:dn	691.698	818.85	603.937
YGL118C::chr7_2:dn	796.168	764.332	1011.08
YGL120C::chr7_2:dn	436.573	612.114	547.555
YGL121C::chr7_2:dn	1641.82	1155.14	1195.95
YGL122C::chr7_2:dn	640.013	503.617	651.645
YGL123W::chr7_2:dn	836.856	784.304	808.322
YGL124C::chr7_2:dn	402.483	538.703	466.235
YGL125W::chr7_2:dn	503.653	395.121	440.213
YGL126W::chr7_2:dn	718.09	513.873	612.069
YGL127C::chr7_2:dn	950.123	1016.41	934.097
YGL128C::chr7_2:dn	455.267	472.85	442.923
YGL129C::chr7_2:dn	1524.16	1534.6	2078.54
YGL130W::chr7_2:dn	1042.5	756.775	814.285
YGL131C::chr7_2:dn	296.913	354.098	428.286
YGL132W::chr7_2:dn	591.627	527.368	577.373
YGL133W::chr7_2:dn	1009.51	847.999	710.195
YGL135W::chr7_2:dn	98.9711	181.367	182.699
YGL136C::chr7_2:dn	13.1961	44.2622	36.323
YGL137W::chr7_2:dn	343.1	209.976	409.853
YGL138C::chr7_2:dn	591.627	536.544	698.268
YGL139W::chr7_2:dn	384.888	449.099	511.232
YGL140C::chr7_2:dn	533.344	486.884	596.889
YGL141W::chr7_2:dn	149.556	129.548	156.135
YGL142C::chr7_2:dn	87.9743	80.4276	95.9577
YGL143C::chr7_2:dn	116.566	71.7911	62.3454
YGL144C::chr7_2:dn	34.0901	12.9548	23.8539
YGL146C::chr7_2:dn	336.502	213.754	253.719
YGL147C::chr7_2:dn	62.6817	51.2794	222.275
YGL148W::chr7_2:dn	134.161	94.462	100.837
YGL149W::chr7_2:dn	20.8939	13.4946	10.3005
YGL150C::chr7_2:dn	5.4984	26.4494	23.3118
YGL151W::chr7_2:dn	16.4952	18.8924	15.1797
YGL152C::chr7_2:dn	17.5949	7.01718	12.4691
YGL153W::chr7_2:dn	158.354	130.088	159.387
YGL154C::chr7_2:dn	16.4952	9.17631	11.9269
YGL155W::chr7_2:dn	142.958	105.258	134.991
YGL156W::chr7_2:dn	10.9968	10.7957	18.9747
YGL157W::chr7_2:dn	26.3923	23.7504	30.3595
YGL158W::chr7_2:dn	49.4856	30.2278	44.455
YGL159W::chr7_2:dn	23.0933	21.0515	28.191
YGL160W::chr7_2:dn	27.492	36.7052	28.7331
YGL163C::chr7_2:dn	19.7942	15.1139	22.2275
YGL165C::chr7_2:dn	85.775	33.4665	47.7078
YGL166W::chr7_2:dn	12.0965	14.5741	7.58987
YGL167C::chr7_2:dn	164.952	131.167	183.783
YGL168W::chr7_2:dn	29.6913	19.4322	49.3342
YGL169W::chr7_2:dn	162.753	105.797	103.548
YGL170C::chr7_2:dn	60.4824	51.2794	60.1769
YGL171W::chr7_2:dn	87.9743	74.49	58.0083
YGL172W::chr7_2:dn	148.457	105.258	124.149
YGL173C::chr7_2:dn	23.0933	14.5741	22.2275
YGL175C::chr7_2:dn	9.89711	10.2559	9.21628
YGL176C::chr7_2:dn	13.1961	5.93761	8.67414
YGL177W::chr7_2:dn	16.4952	13.4946	9.21628
YGL180W::chr7_2:dn	5.4984	10.2559	2.71067
YGL181W::chr7_2:dn	31.8907	15.1139	20.059
YGL194C::chr7_3:dn	57.1833	35.6257	63.4297
YGL195W::chr7_3:dn	2.19936	4.85805	14.6376
YGL197W::chr7_3:dn	56.0836	47.5009	47.1656
YGL198W::chr7_3:dn	50.5852	29.6881	39.0336
YGL199C::chr7_3/chr00_12:dn	2.19936	5.39783	8.67414
YGL201C::chr7_3:dn	30.791	22.6709	39.0336
YGL202W::chr7_3:dn	28.5917	22.1311	3.79494
YGL203C::chr7_3:dn	23.0933	15.6537	16.264
YGL205W::chr7_3:dn	6.59807	11.8752	15.1797
YGL206C::chr7_3:dn	49.4856	39.4041	37.4072
YGL207W::chr7_3:dn	103.37	63.1546	43.9128
YGL209W::chr7_3:dn	51.6849	33.4665	67.7667
YGL212W::chr7_3:dn	12.0965	6.47739	8.67414
YGL214W::chr7_3/chr00_12:dn	27.492	6.47739	16.264
YGL217C::chr7_3/chr00_12:dn	41.7878	22.6709	44.455
YGL218W::chr7_3/chr00_12:dn	7.69775	3.2387	5.96347
YGL222C::chr7_3:dn	12.0965	65.3137	71.0195
YGL225W::chr7_3:dn	126.463	103.099	124.691
YGL226C-A::chr7_3:dn	62.6817	69.632	87.8257
YGL228W::chr7_3:dn	6.59807	7.01718	7.58987
YGL229C::chr7_3:dn	8.79743	20.5117	20.059
YGL230C::chr7_3:dn	5.4984	3.2387	10.8427
YGL231C::chr7_3:dn	81.3763	63.1546	81.3201
YGL232W::chr7_3:dn	15.3955	4.85805	7.04774
YGL233W::chr7_3:dn	12.0965	11.3354	9.21628
YGL234W::chr7_3:dn	20.8939	12.9548	15.7219
YGL235W::chr7_3/chr00_12:dn	16.4952	11.3354	13.5533
YGL237C::chr7_3:dn	52.7846	37.245	55.8398
YGL239C::chr7_3/chr00_12:dn	20.8939	10.2559	12.4691
YGL240W::chr7_3:dn	17.5949	10.7957	10.8427
YGL243W::chr7_3:dn	16.4952	14.5741	21.6854
YGL245W::chr7_3:dn	18.6945	16.1935	18.9747
YGL246C::chr7_3:dn	17.5949	6.47739	11.9269
YGL247W::chr7_3:dn	5.4984	5.39783	5.96347
YGL249W::chr7_3:dn	16.4952	13.4946	26.5646
YGL250W::chr7_3:dn	43.9872	24.83	35.7808
YGL253W::chr7_3:dn	79.1769	58.2965	66.6825
YGL254W::chr7_3:dn	109.968	77.1889	94.8734
YGL255W::chr7_3:dn	78.0772	54.5181	61.2611
YGL256W::chr7_3:dn	15.3955	15.1139	12.4691
YGL257C::chr7_3:dn	8.79743	10.7957	9.75841
YGL258W::chr7_3:dn	10.9968	7.01718	16.264
YGL259W::chr7_3:dn	97.8714	38.8644	60.719
YGL260W::chr7_3:dn	10.9968	8.09674	18.9747
YGL261C::chr7_3:dn	10.9968	5.93761	8.13201
YGL263W::chr7_3:dn	9.89711	10.2559	11.3848
YGR001C::chr7_3:dn	63.7814	50.7396	60.1769
YGR003W::chr7_3:dn	35.1897	19.972	19.5168
YGR006W::chr7_3:dn	9.89711	2.15913	8.67414
YGR007W::chr7_3:dn	1476.87	964.592	1119.51
YGR008C::chr7_3:dn	218.836	266.653	6.50561
YGR009C::chr7_3:dn	727.988	1057.97	902.111
YGR010W::chr7_3:dn	865.447	674.189	812.117
YGR011W::chr7_3/chr00_12:dn	2688.72	2169.39	2603.87
YGR012W::chr7_3:dn	23.0933	36.7052	26.0224
YGR013W::chr7_3:dn	1094.18	1196.16	1220.34
YGR014W::chr7_3:dn	1233.84	1088.74	1135.23
YGR015C::chr7_3:dn	6.59807	45.8815	21.6854
YGR016W::chr7_3:dn	845.653	1484.94	988.31
YGR017W::chr7_3:dn	384.888	516.032	563.819
YGR018C::chr7_3/chr00_12:dn	1417.49	1855.23	1700.67
YGR019W::chr7_3:dn	866.547	826.407	915.664
YGR021W::chr7_3:dn	203.441	266.113	332.328
YGR022C::chr7_3/chr00_12:dn	2433.59	2793.92	2507.91
YGR023W::chr7_3:dn	1197.55	1218.29	1052.28
YGR025W::chr7_3/chr00_12:dn	2412.7	2687.04	2627.72
YGR026W::chr7_3:dn	1444.98	1253.92	963.372
YGR027C::chr7_4:dn	24.1929	8.09674	8.67414
YGR029W::chr7_4:dn	21.9936	16.7333	15.1797
YGR030C::chr7_4:dn	35.1897	0.539783	28.191
YGR031W::chr7_4:dn	4.39872	1.61935	8.13201
YGR032W::chr00_14:dn	14.2958	5.39783	9.75841
YGR034W::chr7_4:dn	6.59807	7.55696	13.0112
YGR035C::chr7_4:dn	4.39872	3.2387	5.96347
YGR037C::chr7_4:dn	67.0804	46.9611	59.0926
YGR039W::chr7_4:dn	30.791	18.8924	23.3118
YGR041W::chr7_4:dn	28.5917	19.972	13.0112
YGR042W::chr7_4:dn	25.2926	25.3698	21.6854
YGR044C::chr7_4:dn	810.464	972.149	880.968
YGR045C::chr7_4:dn	1074.39	969.99	881.51
YGR046W::chr00_14:dn	662.007	648.819	496.595
YGR048W::chr00_14:dn	1001.81	1092.52	1021.92
YGR049W::chr7_4:dn	12.0965	11.8752	11.9269
YGR050C::chr00_14:dn	14.2958	10.7957	10.3005
YGR051C::chr7_4:dn	213.338	166.253	175.109
YGR052W::chr7_4:dn	134.161	112.275	146.918
YGR053C::chr00_14:dn	29.6913	32.9268	31.9859
YGR054W::chr7_4:dn	7.69775	8.09674	7.58987
YGR055W::chr7_4:dn	853.351	1164.31	1094.03
YGR056W::chr7_4:dn	567.434	525.748	538.881
YGR057C::chr7_4:dn	681.801	867.971	796.395
YGR058W::chr7_4:dn	935.827	829.106	822.959
YGR059W::chr7_4:dn	842.354	577.568	770.914
YGR060W::chr7_4:dn	123.164	76.6492	76.4409
YGR061C::chr7_4:dn	676.303	717.371	811.574
YGR063C::chr00_14:dn	901.737	831.266	897.774
YGR065C::chr7_4:dn	826.959	1063.37	1025.72
YGR066C::chr7_4:dn	3.29904	6.47739	4.33707
YGR067C::chr7_4:dn	45.0868	24.83	13.0112
YGR068C::chr7_4:dn	19.7942	9.17631	8.67414
YGR069W::chr7_4:dn	9.89711	4.31826	5.96347
YGR070W::chr7_4:dn	3.29904	3.2387	10.3005
YGR071C::chr7_4:dn	4.39872	14.0344	4.87921
YGR072W::chr7_4:dn	1344.91	1025.59	975.299
YGR073C::chr7_4:dn	40.6881	15.6537	23.8539
YGR074W::chr7_4:dn	60.4824	30.2278	47.7078
YGR075C::chr7_4:dn	45.0868	36.1654	37.9494
YGR076C::chr7_4:dn	91.2734	109.036	154.508
YGR077C::chr7_4:dn	1032.6	1127.07	1123.3
YGR078C::chr7_4:dn	128.662	154.378	145.834
YGR080W::chr7_4:dn	245.228	241.283	253.719
YGR081C::chr7_4:dn	994.11	937.603	1253.96
YGR082W::chr00_14:dn	1050.19	1038.54	789.347
YGR083C::chr7_4:dn	139.659	55.5976	63.4297
YGR084C::chr7_4:dn	789.57	868.511	1084.27
YGR085C::chr7_4:dn	30.791	44.802	23.3118
YGR087C::chr7_4:dn	20.8939	17.273	24.9382
YGR088W::chr7_4:dn	787.37	991.581	825.67
YGR089W::chr00_14:dn	957.821	933.824	1084.27
YGR091W::chr7_4:dn	802.766	944.62	758.445
YGR092W::chr00_14:dn	384.888	512.254	473.825
YGR093W::chr00_14:dn	150.656	173.81	177.82
YGR094W::chr7_4:dn	1221.74	1096.84	1054.45
YGR095C::chr7_4:dn	124.264	58.8363	48.2499
YGR096W::chr7_4:dn	201.241	168.412	198.963
YGR097W::chr7_4:dn	47.2862	73.4105	23.3118
YGR098C::chr7_4:dn	927.03	854.476	838.139
YGR099W::chr7_4:dn	68.1801	51.8191	21.1432
YGR100W::chr7_4:dn	916.033	835.584	869.041
YGR101W::chr7_4:dn	593.827	1013.71	1077.76
YGR102C::chr7_4:dn	81.3763	87.9846	121.98
YGR103W::chr7_4:dn	781.872	933.824	865.246
YGR104C::chr7_4:dn	1689.11	1508.69	2026.5
YGR105W::chr7_4:dn	690.598	681.746	578.457
YGR106C::chr00_14:dn	1209.65	1076.33	817.538
YGR108W::chr7_4:dn	1037	475.549	620.201
YGR109C::chr7_4:dn	880.843	733.025	891.81
YGR111W::chr7_4:dn	243.029	173.81	165.351
YGR112W::chr7_4:dn	13.1961	14.5741	17.8904
YGR113W::chr7_4:dn	1342.71	1430.42	1094.03
YGR114C::chr7_4:dn	1626.43	1005.08	1076.14
YGR116W::chr00_14:dn	410.18	351.399	335.039
YGR118W::chr7_4:dn	135.261	141.963	134.991
YGR119C::chr7_4:dn	1129.37	1055.82	820.249
YGR120C::chr7_4:dn	1620.93	1224.23	1113
YGR121C::chr7_4:dn	1154.66	1566.45	1436.11
YGR122W::chr7_4:dn	26.3923	34.5461	101.921
YGR123C::chr7_5:dn	4.39872	8.63652	9.75841
YGR124W::chr7_5:dn	1226.14	1189.68	1289.74
YGR125W::chr7_5:dn	329.904	288.784	323.654
YGR126W::chr7_5:dn	1426.28	1372.67	1481.65
YGR127W::chr7_5:dn	259.524	213.754	294.921
YGR128C::chr7_5:dn	600.425	671.49	623.454
YGR129W::chr7_5:dn	655.409	675.268	708.569
YGR130C::chr7_5:dn	32.9904	33.4665	89.4521
YGR131W::chr7_5:dn	778.573	218.072	175.109
YGR132C::chr7_5:dn	1598.93	1503.3	1534.78
YGR134W::chr00_8:dn	428.875	657.995	677.667
YGR135W::chr7_5:dn	712.592	634.785	581.71
YGR136W::chr7_5:dn	939.126	986.183	986.684
YGR137W::chr7_5:dn	819.261	734.644	634.839
YGR138C::chr7_5:dn	914.933	781.066	792.6
YGR139W::chr7_5:dn	24.1929	23.7504	22.2275
YGR140W::chr7_5:dn	41.7878	32.9268	63.4297
YGR141W::chr7_5:dn	89.074	66.9331	69.9353
YGR142W::chr7_5:dn	1351.51	1080.11	1124.39
YGR143W::chr7_5:dn	83.5756	97.1609	77.5251
YGR144W::chr7_5:dn	128.662	125.769	113.306
YGR145W::chr00_15:dn	985.312	844.76	897.774
YGR147C::chr7_5:dn	64.8811	245.601	351.303
YGR148C::chr7_5:dn	725.788	525.209	449.429
YGR149W::chr7_5:dn	2.19936	10.2559	9.75841
YGR150C::chr7_5:dn	814.862	782.145	838.139
YGR151C::chr7_5:dn	24.1929	17.8128	32.528
YGR153W::chr7_5:dn	768.676	652.597	641.887
YGR154C::chr7_5:dn	656.508	750.298	756.819
YGR155W::chr00_11:dn	578.431	519.271	314.438
YGR155W::chr7_5:dn	787.37	562.993	602.853
YGR156W::chr7_5:dn	1207.45	978.086	1373.77
YGR158C::chr7_5:dn	13.1961	12.415	11.9269
YGR159C::chr7_5:dn	1057.89	1067.15	876.088
YGR160W::chr7_5:dn	1133.77	1071.47	934.639
YGR161C::chr7_5:dn	982.013	895.5	821.333
YGR162W::chr00_17a:dn	1602.23	1882.22	1483.28
YGR163W::chr7_5:dn	1067.79	1165.39	754.108
YGR164W::chr7_5:dn	874.245	845.84	684.173
YGR165W::chr7_5:dn	1199.75	1164.85	1015.96
YGR166W::chr7_5:dn	6.59807	4.85805	5.96347
YGR167W::chr7_5:dn	704.894	678.507	843.018
YGR168C::chr7_5:dn	1215.15	1062.29	914.58
YGR169C::chr7_5:dn	1220.64	1010.47	988.852
YGR170W::chr7_5:dn	1098.58	996.439	1266.42
YGR171C::chr7_5:dn	247.428	382.706	432.081
YGR172C::chr7_5:dn	361.794	272.051	323.112
YGR173W::chr7_5:dn	754.38	767.571	635.381
YGR174C::chr7_5:dn	13.1961	39.9439	22.2275
YGR175C::chr7_5:dn	963.319	921.949	884.763
YGR176W::chr7_5:dn	513.55	813.992	651.103
YGR179C::chr7_5:dn	8.79743	6.47739	4.33707
YGR180C::chr7_5:dn	1195.35	855.556	679.836
YGR181W::chr7_5:dn	1249.24	1258.77	1459.97
YGR182C::chr7_5:dn	1109.58	1063.91	1204.08
YGR183C::chr7_5:dn	5.4984	2.69891	503.1
YGR184C::chr7_5:dn	694.997	989.962	781.215
YGR185C::chr7_5:dn	1135.97	1325.17	1649.17
YGR187C::chr7_5:dn	828.058	1142.72	809.406
YGR188C::chr00_10:dn	627.917	759.474	590.926
YGR189C::chr7_5:dn	1021.6	1113.57	1017.59
YGR190C::chr7_5:dn	1193.15	1191.3	1219.26
YGR191W::chr7_5:dn	689.499	873.369	831.633
YGR192C::chr7_5:dn	63.7814	76.1094	103.005
YGR193C::chr7_5:dn	5.4984	1.07957	10.3005
YGR194C::chr7_5:dn	1280.03	1250.68	1257.75
YGR195W::chr7_5:dn	1184.35	1257.69	1241.49
YGR196C::chr7_5:dn	1228.34	999.678	880.968
YGR197C::chr7_5:dn	53.8843	121.451	58.0083
YGR198W::chr7_5:dn	1426.28	1416.39	1437.74
YGR199W::chr7_5:dn	216.637	167.333	160.472
YGR201C::chr00_10:dn	1223.94	1247.44	1099.45
YGR202C::chr7_5:dn	1320.71	1590.2	2345.27
YGR203W::chr7_5:dn	786.271	1034.22	808.864
YGR204W::chr00_10:dn	530.045	881.465	715.075
YGR205W::chr7_5:dn	175.949	109.576	127.401
YGR206W::chr7_5:dn	268.322	63.1546	274.862
YGR207C::chr7_5:dn	1679.21	1601	1661.1
YGR208W::chr7_5:dn	506.952	2.69891	1.6264
YGR209C::chr7_5:dn	514.65	494.441	303.595
YGR210C::chr00_8:dn	12.0965	3.77848	8.67414
YGR211W::chr7_5:dn	2225.75	1718.67	1478.4
YGR212W::chr7_5:dn	1461.47	1351.08	1390.03
YGR213C::chr7_5:dn	1762.79	1875.21	1809.1
YGR214W::chr7_5:dn	1044.7	972.689	1335.82
YGR215W::chr7_5:dn	19.7942	14.0344	20.6011
YGR216C::chr7_5:dn	32.9904	22.6709	23.3118
YGR217W::chr7_5:dn	1407.59	1011.01	899.942
YGR218W::chr7_5:dn	147.357	182.986	267.272
YGR219W::chr00_2:dn	919.332	743.821	782.841
YGR220C::chr00_2:dn	295.814	258.016	350.218
YGR221C::chr00_2:dn	12.0965	6.47739	7.04774
YGR222W::chr00_2:dn	889.64	848.539	852.777
YGR223C::chr00_2:dn	634.515	626.148	635.923
YGR227W::chr00_2:dn	902.837	980.246	975.841
YGR228W::chr00_2:dn	68.1801	37.245	44.455
YGR229C::chr00_2:dn	52.7846	47.5009	69.3931
YGR231C::chr00_2:dn	40.6881	31.3074	91.0785
YGR232W::chr00_2:dn	1044.7	1029.37	1128.18
YGR233C::chr00_2:dn	31.8907	30.2278	29.8174
YGR235C::chr00_2:dn	41.7878	36.7052	49.3342
YGR236C::chr00_2:dn	469.563	341.683	400.095
YGR237C::chr00_2:dn	475.061	780.526	588.757
YGR238C::chr00_14:dn	49.4856	76.6492	84.0308
YGR239C::chr00_14:dn	1061.19	1074.17	1108.66
YGR241C::chr00_2:dn	1.09968	3.77848	9.75841
YGR242W::chr00_2:dn	21.9936	17.8128	31.9859
YGR243W::chr00_2:dn	24.1929	30.2278	36.323
YGR245C::chr00_2:dn	37.3891	44.802	53.1291
YGR246C::chr00_2:dn	1351.51	1216.13	1317.39
YGR247W::chr00_2:dn	4.39872	2.69891	9.21628
YGR249W::chr00_2:dn	42.8875	49.1202	46.6235
YGR250C::chr00_14:dn	48.3859	37.245	54.2134
YGR251W::chr00_2:dn	235.331	140.883	139.328
YGR252W::chr00_17a:dn	16.4952	5.93761	8.13201
YGR253C::chr00_3:dn	26.3923	20.5117	16.8062
YGR254W::chr00_17a:dn	370.592	415.093	491.173
YGR255C::chr00_17a:dn	12.0965	5.93761	8.13201
YGR256W::chr00_3:dn	133.061	92.3029	117.101
YGR258C::chr00_17a:dn	846.753	1035.84	846.813
YGR259C::chr00_3:dn	3.29904	7.55696	8.67414
YGR260W::chr00_3:dn	1651.72	1514.09	1458.88
YGR261C::chr00_3:dn	1514.26	1772.65	1937.59
YGR262C::chr00_3:dn	1234.94	1306.27	1099.99
YGR264C::chr00_3:dn	2251.04	2133.22	2093.72
YGR265W::chr00_3:dn	6.59807	2.69891	8.13201
YGR266W::chr00_3:dn	20.8939	11.3354	16.264
YGR267C::chr00_3:dn	9.89711	15.1139	7.58987
YGR269W::chr00_3:dn	39.5884	35.6257	45.5392
YGR270W::chr00_3:dn	1106.28	935.444	963.914
YGR271W::chr00_17a:dn	884.142	775.668	799.647
YGR273C::chr00_17a:dn	4.39872	8.09674	3.2528
YGR276C::chr00_17a:dn	5.4984	4.31826	8.13201
YGR278W::chr00_3:dn	509.151	738.963	736.218
YGR279C::chr00_3:dn	773.074	964.592	912.411
YGR281W::chr00_3:dn	120.965	102.559	87.2836
YGR283C::chr00_3:dn	13.1961	3.2387	5.42134
YGR284C::chr00_3:dn	417.878	691.462	782.841
YGR287C::chr00_3:dn	944.624	655.296	650.019
YGR288W::chr00_3:dn	8.79743	3.77848	5.96347
YGR289C::chr00_17a:dn	684	360.035	296.547
YGR290W::chr00_3:dn	7.69775	2.15913	7.58987
YGR291C::chr00_17a:dn	21.9936	19.972	13.0112
YGR292W::chr00_17a:dn	1217.34	598.079	814.285
YGR295C::chr00_17b:dn	131.961	99.8598	117.643
YHL003C::chr8_1:dn	12.0965	7.01718	12.4691
YHL006C::chr8_1:dn	35.1897	134.406	138.244
YHL008C::chr8_1:dn	716.991	931.125	954.698
YHL009C::chr8_1:dn	27.492	20.5117	21.6854
YHL010C::chr8_1:dn	865.447	803.737	820.791
YHL011C::chr00_10:dn	42.8875	42.6428	36.8651
YHL012W::chr8_1:dn	95.6721	86.3652	110.053
YHL014C::chr8_1:dn	1608.83	1737.02	2225.46
YHL015W::chr8_1:dn	1530.75	1298.18	1265.34
YHL016C::chr8_1:dn	678.502	704.417	737.844
YHL017W::chr8_1:dn	134.161	253.158	211.974
YHL019C::chr8_1:dn	840.155	521.97	589.3
YHL020C::chr8_1:dn	7.69775	5.93761	4.33707
YHL021C::chr8_1:dn	679.602	488.503	524.786
YHL022C::chr8_1:dn	707.094	842.601	866.872
YHL023C::chr8_1:dn	45.0868	80.9674	42.8286
YHL025W::chr00_8:dn	880.843	914.932	1005.12
YHL026C::chr8_1:dn	1297.62	1164.85	1254.5
YHL027W::chr8_1:dn	1462.57	1287.38	1343.95
YHL028W::chr8_1:dn	828.058	1294.94	1178.6
YHL029C::chr8_1:dn	226.534	130.627	182.157
YHL030W::chr8_1:dn	7.69775	9.71609	11.9269
YHL031C::chr8_1:dn	531.145	416.173	466.235
YHL032C::chr8_1:dn	95.6721	73.4105	74.2723
YHL033C::chr8_1:dn	872.046	1294.4	1564.06
YHL034C::chr8_1:dn	828.058	1066.07	928.133
YHL035C::chr8_1:dn	1029.3	1223.15	1151.49
YHL036W::chr8_1:dn	109.968	98.2405	104.632
YHL037C::chr8_1:dn	190.244	161.395	154.508
YHL038C::chr8_1:dn	1069.99	1007.77	1257.21
YHL039W::chr00_10:dn	580.631	499.299	648.392
YHL040C::chr8_1:dn	1494.46	1167.01	1261.55
YHL041W::chr8_1:dn	5.4984	9.71609	7.04774
YHL042W::chr8_1:dn	1739.69	1387.78	1513.64
YHL043W::chr8_1:dn	2110.28	2549.39	2304.61
YHL044W::chr8_1:dn	1212.95	1443.38	1363.47
YHL045W::chr8_1:dn	15.3955	25.3698	13.0112
YHL046C::chr8_1:dn	3.29904	3.77848	7.04774
YHL047C::chr8_1:dn	1098.58	1311.13	1240.94
YHR001W-A::chr8_1:dn	958.92	839.362	527.496
YHR004C::chr00_10:dn	4.39872	5.39783	24.396
YHR005C-A::chr00_3:dn	870.946	986.183	847.897
YHR006W::chr00_10:dn	108.868	84.7459	73.7302
YHR007C::chr00_10:dn	24.1929	26.9891	24.396
YHR008C::chr00_10:dn	32.9904	25.9096	28.7331
YHR009C::chr00_10:dn	12.0965	16.1935	13.5533
YHR010W::chr8_1:dn	404.682	382.706	272.151
YHR011W::chr8_1:dn	3.29904	5.39783	10.8427
YHR012W::chr8_1:dn	158.354	103.638	153.424
YHR013C::chr8_1:dn	45.0868	33.4665	33.6123
YHR014W::chr8_1:dn	17.5949	15.6537	15.1797
YHR015W::chr8_1:dn	1152.46	907.375	1240.94
YHR016C::chr00_8:dn	311.209	1100.08	1049.57
YHR017W::chr00_8:dn	976.515	877.147	690.136
YHR018C::chr8_1:dn	16.4952	5.39783	8.13201
YHR019C::chr8_1:dn	12.0965	5.93761	9.21628
YHR020W::chr8_1:dn	684	621.29	780.131
YHR021C::chr8_1:dn	934.727	1079.57	923.254
YHR022C::chr8_1:dn	1015	1197.78	1044.15
YHR023W::chr00_10:dn	12.0965	7.55696	13.5533
YHR024C::chr8_1:dn	28.5917	19.4322	11.3848
YHR025W::chr00_10:dn	64.8811	76.6492	89.4521
YHR028C::chr8_1:dn	170.45	131.707	134.449
YHR029C::chr8_1:dn	19.7942	19.972	21.1432
YHR030C::chr8_1:dn	785.171	882.545	865.788
YHR031C::chr8_1:dn	916.033	1035.84	1034.93
YHR032W::chr00_8:dn	543.241	617.512	528.038
YHR033W::chr8_1:dn	8.79743	5.39783	10.3005
YHR034C::chr8_1:dn	467.364	503.078	429.37
YHR035W::chr8_1:dn	12.0965	12.415	19.5168
YHR037W::chr8_1:dn	771.975	872.829	841.392
YHR038W::chr8_1:dn	268.322	197.021	223.901
YHR039C::chr8_1:dn	899.538	762.713	809.406
YHR040W::chr8_1:dn	129.762	85.8255	11.9269
YHR043C::chr8_1:dn	1247.04	1176.19	1165.59
YHR044C::chr8_1:dn	37.3891	24.2902	41.7443
YHR045W::chr00_8:dn	537.743	760.014	531.833
YHR046C::chr8_2:dn	74.7782	82.5868	84.0308
YHR047C::chr8_2:dn	38.4888	37.245	48.7921
YHR048W::chr8_2:dn	19.7942	15.6537	31.4438
YHR049C-A::chr8_2:dn	41.7878	55.0578	87.8257
YHR049W::chr8_2:dn	7.69775	8.09674	16.8062
YHR050W::chr8_2:dn	1696.8	1618.27	1373.23
YHR051W::chr8_2:dn	1242.64	1332.72	1931.62
YHR057C::chr8_2:dn	2071.8	1732.7	1552.67
YHR058C::chr00_10:dn	56.0836	17.273	46.0814
YHR059W::chr00_10:dn	2.19936	1.07957	10.3005
YHR060W::chr8_2:dn	883.042	930.046	873.92
YHR061C::chr8_2:dn	1110.68	1187.52	1159.08
YHR062C::chr8_2:dn	186.945	226.169	44.455
YHR064C::chr00_8:dn	3.29904	9.17631	27.1067
YHR065C::chr8_2:dn	933.628	1008.85	685.257
[truncated: 2,788 more rows]

## Sheet: flight+NaCl
Strain tag	7 generations	14 generations	21 generations
YAL001C::chr1_1:up	247.759	165.728	412.291
YAL003W::chr1_1:up	513.214	497.185	439.777
YAL004W::chr1_1:up	123.879	165.728	109.944
YAL007C::chr1_1:up	672.488	497.185	357.319
YAL008W::chr1_1:up	194.668	331.457	137.43
YAL009W::chr1_1:up	831.761	637.417	659.666
YAL010C::chr1_1:up	389.335	586.424	302.347
YAL011W::chr1_1:up	424.729	484.437	412.291
YAL013W::chr1_1:up	530.911	866.887	1126.93
YAL014C::chr1_1:up	690.185	637.417	549.722
YAL015C::chr1_1:up	796.367	726.655	879.555
YAL016W::chr00_12:up	123.879	152.98	192.403
YAL017W::chr1_1:up	849.458	471.688	329.833
YAL018C::chr1_1:up	159.273	305.96	164.916
YAL019W::chr1_1:up	194.668	305.96	412.291
YAL020C::chr1_1:up	513.214	446.192	274.861
YAL021C::chr1_1:up	247.759	433.443	109.944
YAL022C::chr1_1:up	283.153	242.218	82.4582
YAL023C::chr1_1:up	477.82	382.45	412.291
YAL024C::chr00_17a:up	619.397	611.92	962.013
YAL025C::chr1_1:up	283.153	203.973	357.319
YAL026C::chr1_1:up	477.82	318.708	219.889
YAL027W::chr1_1:up	707.882	803.145	879.555
YAL028W::chr1_1:up	831.761	535.43	659.666
YAL029C::chr1_1:up	654.791	713.907	797.096
YAL030W::chr1_1:up	230.062	369.702	522.236
YAL031C::chr1_1:up	495.517	892.384	494.749
YAL032C::chr1_1:up	141.576	446.192	247.375
YAL033W::chr1_1:up	566.305	433.443	549.722
YAL034C::chr1_1:up	230.062	216.722	137.43
YAL034W-A::chr1_1:up	1327.28	586.424	632.18
YAL035C-A::chr1_1:up	176.97	242.218	192.403
YAL035W::chr1_1:up	407.032	522.682	467.263
YAL036C::chr1_1:up	460.123	535.43	329.833
YAL037W::chr1_1:up	230.062	369.702	302.347
YAL038W::chr1_1:up	53.0911	203.973	192.403
YAL039C::chr1_1:up	194.668	191.225	219.889
YAL040C::chr1_1:up	265.456	344.205	357.319
YAL041W::chr1_1:up	265.456	344.205	384.805
YAL042W::chr1_1:up	371.638	369.702	384.805
YAL045C::chr1_1:up	283.153	458.94	467.263
YAL046C::chr1_1:up	300.85	395.198	714.638
YAL048C::chr1_1:up	230.062	191.225	192.403
YAL049C::chr1_1:up	920.246	790.397	549.722
YAL051W::chr1_1:up	601.7	573.675	439.777
YAL053W::chr1_1:up	123.879	242.218	274.861
YAL054C::chr00_12:up	707.882	611.92	962.013
YAL055W::chr1_1:up	548.608	548.179	522.236
YAL056W::chr1_1:up	159.273	280.463	467.263
YAL058C-A::chr00_12:up	778.67	713.907	769.61
YAL058W::chr1_1:up	548.608	611.92	769.61
YAL059W::chr1_1:up	176.97	229.47	219.889
YAL060W::chr1_1:up	460.123	509.933	632.18
YAL061W::chr1_1:up	654.791	599.172	879.555
YAL062W::chr1_1:up	619.397	624.669	357.319
YAL064C-A::chr00_1:up	495.517	522.682	907.041
YAL065C::chr1_1:up	88.4852	254.967	302.347
YAL066W::chr1_1:up	389.335	267.715	164.916
YAL067C::chr1_1:up	141.576	420.695	247.375
YAL068C::chr1_1:up	371.638	305.96	439.777
YAR002C-A::chr00_16a:up	1221.1	968.874	714.638
YAR003W::chr1_1:up	1309.58	828.642	687.152
YAR007C::chr1_1:up	513.214	777.649	412.291
YAR008W::chr1_1:up	424.729	267.715	522.236
YAR014C::chr1_1:up	353.941	522.682	632.18
YAR015W::chr1_1:up	265.456	331.457	219.889
YAR019C::chr1_1:up	690.185	484.437	549.722
YAR020C::chr1_1:up	176.97	242.218	109.944
YAR023C::chr1_1:up	566.305	548.179	522.236
YAR027W::chr1_1:up	336.244	382.45	302.347
YAR028W::chr1_1:up	460.123	624.669	577.208
YAR029W::chr1_1:up	1203.4	854.139	769.61
YAR030C::chr1_1:up	831.761	905.132	962.013
YAR031W::chr1_1:up	424.729	369.702	494.749
YAR035W::chr1_1:up	725.579	790.397	797.096
YAR037W::chr1_1:up	566.305	433.443	549.722
YAR040C::chr1_1:up	902.549	420.695	742.124
YAR042W::chr1_1:up	318.547	522.682	384.805
YAR043C::chr1_1:up	106.182	267.715	219.889
YAR047C::chr1_1:up	336.244	305.96	494.749
YAR050W::chr00_12:up	230.062	254.967	274.861
YBL001C::chr2_1:up	247.759	280.463	219.889
YBL003C::chr2_1:up	88.4852	216.722	109.944
YBL004W::chr2_1:up	194.668	305.96	357.319
YBL007C::chr2_1:up	336.244	382.45	329.833
YBL008W::chr2_1:up	265.456	305.96	549.722
YBL009W::chr2_1:up	300.85	471.688	27.4861
YBL012C::chr2_1:up	141.576	484.437	274.861
YBL013W::chr2_1:up	495.517	713.907	879.555
YBL015W::chr2_1:up	371.638	522.682	632.18
YBL016W::chr2_1:up	141.576	254.967	137.43
YBL018C::chr2_1:up	194.668	267.715	137.43
YBL020W::chr2_1:up	123.879	203.973	137.43
YBL024W::chr2_1:up	371.638	331.457	549.722
YBL026W::chr2_1:up	442.426	446.192	412.291
YBL027W::chr2_1:up	70.7882	140.232	82.4582
YBL028C::chr2_1:up	283.153	229.47	302.347
YBL029W::chr2_1:up	265.456	407.947	329.833
YBL031W::chr2_1:up	176.97	203.973	219.889
YBL033C::chr2_1:up	70.7882	152.98	82.4582
YBL034C::chr2_1:up	230.062	318.708	274.861
YBL035C::chr2_1:up	212.365	280.463	192.403
YBL036C::chr2_1:up	336.244	369.702	82.4582
YBL037W::chr2_1:up	424.729	369.702	302.347
YBL038W::chr2_1:up	247.759	331.457	192.403
YBL039C::chr2_1:up	159.273	280.463	137.43
YBL048W::chr2_1:up	442.426	203.973	247.375
YBL049W::chr2_1:up	106.182	191.225	54.9722
YBL050W::chr2_1:up	283.153	535.43	54.9722
YBL051C::chr2_1:up	194.668	216.722	137.43
YBL052C::chr2_1:up	106.182	242.218	109.944
YBL053W::chr2_1:up	212.365	203.973	219.889
YBL054W::chr2_1:up	371.638	395.198	302.347
YBL055C::chr2_1:up	141.576	140.232	82.4582
YBL056W::chr2_1:up	123.879	305.96	54.9722
YBL057C::chr2_1:up	371.638	382.45	467.263
YBL059W::chr2_1:up	123.879	446.192	274.861
YBL060W::chr2_1:up	106.182	293.212	192.403
YBL061C::chr2_1:up	460.123	497.185	357.319
YBL062W::chr2_1:up	566.305	420.695	494.749
YBL063W::chr2_1:up	601.7	382.45	742.124
YBL064C::chr2_1:up	159.273	229.47	219.889
YBL066C::chr2_1:up	176.97	242.218	192.403
YBL067C::chr2_1:up	194.668	242.218	274.861
YBL068W::chr2_1:up	106.182	152.98	109.944
YBL070C::chr2_1:up	123.879	140.232	274.861
YBL071C::chr2_1:up	371.638	395.198	192.403
YBL072C::chr2_1:up	318.547	331.457	164.916
YBL074C::chr2_1:up	247.759	216.722	219.889
YBL076C::chr2_1:up	194.668	127.483	137.43
YBL077W::chr2_1:up	265.456	305.96	302.347
YBL078C::chr2_1:up	283.153	229.47	192.403
YBL079W::chr2_1:up	176.97	267.715	247.375
YBL082C::chr2_1:up	336.244	331.457	302.347
YBL083C::chr2_1:up	141.576	216.722	329.833
YBL084C::chr2_1:up	212.365	191.225	302.347
YBL085W::chr2_1:up	230.062	114.735	164.916
YBL086C::chr2_1:up	230.062	229.47	247.375
YBL087C::chr2_1:up	371.638	446.192	412.291
YBL088C::chr2_1:up	389.335	382.45	192.403
YBL089W::chr2_1:up	778.67	739.404	604.694
YBL090W::chr2_1:up	194.668	101.987	219.889
YBL091C-A::chr00_1:up	548.608	790.397	797.096
YBL091C::chr2_1:up	123.879	140.232	137.43
YBL092W::chr2_1:up	672.488	548.179	522.236
YBL093C::chr2_1:up	194.668	267.715	439.777
YBL094C::chr2_1:up	353.941	522.682	412.291
YBL096C::chr2_2:up	283.153	216.722	302.347
YBL097W::chr2_2:up	1026.43	1109.11	989.499
YBL098W::chr2_2:up	725.579	726.655	1126.93
YBL099W::chr2_2:up	442.426	471.688	357.319
YBL100C::chr2_2:up	690.185	815.894	714.638
YBL101C::chr2_2:up	477.82	662.914	549.722
YBL102W::chr2_2:up	300.85	203.973	164.916
YBL103C::chr2_2:up	495.517	471.688	769.61
YBL104C::chr2_2:up	955.64	930.629	494.749
YBL105C::chr2_2:up	495.517	382.45	329.833
YBL106C::chr2_2:up	176.97	293.212	164.916
YBL107C::chr2_2:up	159.273	203.973	137.43
YBR001C::chr2_2:up	247.759	242.218	82.4582
YBR002C::chr2_2:up	371.638	458.94	302.347
YBR003W::chr2_2:up	353.941	662.914	549.722
YBR005W::chr2_2:up	194.668	242.218	109.944
YBR007C::chr2_2:up	159.273	140.232	54.9722
YBR008C::chr2_2:up	247.759	229.47	137.43
YBR009C::chr2_2:up	283.153	318.708	247.375
YBR010W::chr2_2:up	495.517	739.404	522.236
YBR011C::chr2_2:up	424.729	548.179	412.291
YBR012C::chr2_2:up	159.273	458.94	302.347
YBR013C::chr2_2:up	265.456	318.708	384.805
YBR015C::chr2_2:up	123.879	293.212	0
YBR017C::chr2_2:up	159.273	305.96	109.944
YBR018C::chr2_2:up	778.67	497.185	357.319
YBR020W::chr00_18:up	1079.52	1249.34	1209.39
YBR022W::chr2_2:up	265.456	280.463	329.833
YBR023C::chr2_2:up	318.547	560.927	384.805
YBR024W::chr2_2:up	212.365	293.212	412.291
YBR025C::chr2_2:up	300.85	89.2384	137.43
YBR027C::chr2_2:up	53.0911	254.967	82.4582
YBR028C::chr2_2:up	159.273	254.967	192.403
YBR030W::chr2_2:up	35.3941	254.967	302.347
YBR031W::chr2_2:up	247.759	305.96	247.375
YBR032W::chr2_2:up	283.153	229.47	137.43
YBR033W::chr2_2:up	566.305	739.404	494.749
YBR034C::chr2_2:up	123.879	216.722	109.944
YBR036C::chr2_2:up	70.7882	178.477	109.944
YBR037C::chr2_2:up	88.4852	178.477	192.403
YBR039W::chr2_2:up	176.97	293.212	192.403
YBR040W::chr2_2:up	460.123	497.185	274.861
YBR041W::chr2_2:up	123.879	242.218	219.889
YBR042C::chr2_2:up	300.85	484.437	412.291
YBR043C::chr2_2:up	477.82	573.675	274.861
YBR045C::chr2_2:up	460.123	395.198	329.833
YBR046C::chr2_2:up	601.7	471.688	577.208
YBR047W::chr2_2:up	283.153	369.702	137.43
YBR048W::chr2_2:up	106.182	203.973	192.403
YBR050C::chr2_2:up	123.879	203.973	137.43
YBR051W::chr2_2:up	53.0911	216.722	109.944
YBR053C::chr2_2:up	17.697	140.232	109.944
YBR054W::chr2_2:up	123.879	178.477	109.944
YBR055C::chr2_2:up	424.729	548.179	302.347
YBR056W::chr2_2:up	353.941	433.443	302.347
YBR057C::chr2_2:up	230.062	280.463	329.833
YBR058C::chr2_2:up	212.365	331.457	27.4861
YBR059C::chr2_2:up	460.123	726.655	412.291
YBR061C::chr2_2:up	389.335	522.682	274.861
YBR062C::chr2_2:up	300.85	254.967	137.43
YBR063C::chr2_2:up	230.062	305.96	357.319
YBR064W::chr2_2:up	300.85	254.967	192.403
YBR065C::chr2_2:up	566.305	216.722	247.375
YBR066C::chr2_2:up	566.305	471.688	439.777
YBR067C::chr2_2:up	176.97	407.947	27.4861
YBR068C::chr2_2:up	442.426	369.702	247.375
YBR069C::chr2_2:up	212.365	344.205	219.889
YBR070C::chr2_2:up	106.182	267.715	54.9722
YBR071W::chr2_2:up	194.668	191.225	219.889
YBR072W::chr2_2:up	353.941	280.463	357.319
YBR073W::chr2_2:up	123.879	165.728	109.944
YBR074W::chr2_2:up	212.365	203.973	164.916
YBR075W::chr2_2:up	176.97	140.232	219.889
YBR076W::chr2_2:up	212.365	331.457	164.916
YBR077C::chr2_2:up	283.153	280.463	82.4582
YBR078W::chr2_2:up	247.759	382.45	137.43
YBR079C::chr2_2:up	442.426	611.92	494.749
YBR080C::chr00_16a:up	300.85	242.218	192.403
YBR081C::chr2_3:up	973.338	1032.62	632.18
YBR082C::chr2_3:up	318.547	331.457	302.347
YBR083W::chr00_16a:up	442.426	726.655	247.375
YBR084C-A::chr00_16a:up	654.791	382.45	274.861
YBR084W::chr2_3:up	1168.01	1007.12	742.124
YBR085W::chr2_3:up	1061.82	1160.1	467.263
YBR086C::chr2_3:up	1468.85	1070.86	1484.25
YBR087W::chr2_3/chr00_16a:up	460.123	675.662	467.263
YBR088C::chr00_16a:up	336.244	433.443	412.291
YBR089W::chr2_3:up	460.123	573.675	329.833
YBR090C-A::chr2_3:up	389.335	739.404	439.777
YBR090C::chr00_16a:up	141.576	420.695	412.291
YBR091C::chr2_3:up	371.638	560.927	439.777
YBR092C::chr2_3:up	407.032	344.205	659.666
YBR093C::chr2_3:up	194.668	101.987	192.403
YBR094W::chr2_3:up	548.608	650.165	577.208
YBR096W::chr2_3:up	212.365	331.457	412.291
YBR098W::chr2_3:up	460.123	433.443	274.861
YBR099C::chr2_3:up	123.879	165.728	109.944
YBR100W::chr2_3/chr00_16a:up	530.911	497.185	604.694
YBR103W::chr2_3:up	265.456	433.443	467.263
YBR104W::chr2_3:up	442.426	764.9	384.805
YBR106W::chr2_3:up	212.365	293.212	329.833
YBR107C::chr2_3:up	477.82	624.669	494.749
YBR111C::chr2_3:up	690.185	764.9	1126.93
YBR112C::chr00_16a:up	796.367	790.397	659.666
YBR115C::chr2_3:up	141.576	216.722	82.4582
YBR117C::chr2_3:up	159.273	165.728	357.319
YBR119W::chr2_3:up	513.214	433.443	577.208
YBR120C::chr2_3:up	88.4852	229.47	137.43
YBR121C::chr00_16a:up	884.852	471.688	549.722
YBR123C::chr2_3:up	371.638	318.708	384.805
YBR124W::chr2_3:up	477.82	586.424	302.347
YBR125C::chr00_16a:up	707.882	675.662	577.208
YBR128C::chr2_3:up	247.759	165.728	54.9722
YBR129C::chr2_3:up	106.182	152.98	219.889
YBR130C::chr2_3:up	283.153	344.205	137.43
YBR131W::chr00_16a:up	1610.43	1466.06	1621.68
YBR132C::chr2_3:up	353.941	560.927	247.375
YBR134W::chr2_3:up	407.032	395.198	302.347
YBR136W::chr2_3:up	141.576	216.722	54.9722
YBR137W::chr2_3:up	530.911	12.7483	329.833
YBR138C::chr2_3:up	530.911	395.198	522.236
YBR139W::chr2_3:up	513.214	752.152	632.18
YBR140C::chr2_3:up	353.941	764.9	714.638
YBR141C::chr2_3:up	513.214	407.947	467.263
YBR142W::chr2_3:up	141.576	140.232	54.9722
YBR143C::chr2_3:up	106.182	152.98	109.944
YBR144C::chr2_3:up	353.941	318.708	192.403
YBR145W::chr2_3:up	424.729	675.662	494.749
YBR146W::chr2_3:up	654.791	917.88	439.777
YBR147W::chr2_3:up	584.003	395.198	247.375
YBR150C::chr00_16a:up	1256.49	25.4967	494.749
YBR151W::chr2_3:up	371.638	344.205	247.375
YBR152W::chr2_3:up	371.638	560.927	467.263
YBR153W::chr2_3:up	389.335	471.688	467.263
YBR154C::chr2_3:up	212.365	114.735	164.916
YBR157C::chr2_3:up	141.576	165.728	27.4861
YBR158W::chr2_3:up	530.911	509.933	274.861
YBR161W::chr2_3:up	495.517	331.457	439.777
YBR162W-A::chr2_3:up	194.668	331.457	219.889
YBR163W::chr2_3:up	389.335	701.159	329.833
YBR164C::chr2_3:up	584.003	560.927	384.805
YBR165W::chr2_3:up	106.182	178.477	54.9722
YBR166C::chr2_3:up	265.456	331.457	357.319
YBR167C::chr2_3:up	88.4852	318.708	302.347
YBR168W::chr00_16a:up	265.456	344.205	274.861
YBR169C::chr00_16a:up	212.365	382.45	137.43
YBR170C::chr2_3:up	495.517	611.92	797.096
YBR171W::chr2_3:up	194.668	242.218	357.319
YBR172C::chr2_3:up	371.638	458.94	439.777
YBR173C::chr2_4:up	1044.13	739.404	247.375
YBR174C::chr2_4:up	672.488	611.92	302.347
YBR175W::chr2_4:up	477.82	407.947	632.18
YBR176W::chr2_4:up	106.182	165.728	164.916
YBR177C::chr2_4:up	141.576	267.715	109.944
YBR178W::chr2_4:up	637.094	560.927	357.319
YBR179C::chr2_4:up	318.547	318.708	247.375
YBR180W::chr2_4:up	265.456	356.953	412.291
YBR181C::chr2_4:up	300.85	318.708	192.403
YBR182C::chr2_4:up	513.214	701.159	302.347
YBR184W::chr2_4:up	619.397	879.635	797.096
YBR185C::chr2_4:up	318.547	191.225	164.916
YBR186W::chr2_4:up	230.062	229.47	329.833
YBR188C::chr2_4:up	283.153	318.708	329.833
YBR189W::chr00_14:up	849.458	764.9	797.096
YBR193C::chr2_4:up	389.335	548.179	302.347
YBR194W::chr2_4:up	194.668	344.205	192.403
YBR195C::chr2_4:up	283.153	216.722	109.944
YBR196C::chr2_4:up	265.456	331.457	192.403
YBR197C::chr2_4:up	88.4852	484.437	109.944
YBR199W::chr2_4:up	725.579	752.152	219.889
YBR200W::chr2_4:up	88.4852	229.47	27.4861
YBR202W::chr2_4:up	265.456	267.715	164.916
YBR204C::chr2_4:up	371.638	216.722	357.319
YBR205W::chr2_4:up	796.367	713.907	714.638
YBR206W::chr2_4:up	495.517	497.185	742.124
YBR207W::chr2_4:up	265.456	203.973	274.861
YBR208C::chr2_4:up	371.638	650.165	467.263
YBR209W::chr2_4:up	353.941	458.94	192.403
YBR211C::chr2_4:up	371.638	344.205	109.944
YBR212W::chr2_4:up	884.852	650.165	742.124
YBR214W::chr2_4:up	247.759	344.205	247.375
YBR216C::chr2_4:up	442.426	407.947	219.889
YBR217W::chr2_4:up	141.576	356.953	137.43
YBR218C::chr2_4:up	141.576	382.45	247.375
YBR219C::chr2_4:up	141.576	382.45	54.9722
YBR220C::chr2_4:up	884.852	841.39	797.096
YBR222C::chr2_4:up	513.214	509.933	604.694
YBR224W::chr2_4:up	991.035	866.887	412.291
YBR225W::chr2_4:up	194.668	152.98	82.4582
YBR226C::chr2_4:up	407.032	382.45	302.347
YBR227C::chr2_4:up	601.7	560.927	742.124
YBR228W::chr2_4:up	283.153	395.198	219.889
YBR229C::chr2_4:up	530.911	675.662	412.291
YBR230C::chr2_4:up	601.7	675.662	687.152
YBR231C::chr2_4:up	265.456	280.463	247.375
YBR232C::chr00_8:up	955.64	1313.08	879.555
YBR233W::chr2_4:up	194.668	382.45	274.861
YBR234C::chr2_4:up	548.608	624.669	467.263
YBR235W::chr2_4:up	407.032	331.457	192.403
YBR236C::chr2_4:up	159.273	242.218	192.403
YBR237W::chr2_4:up	672.488	331.457	329.833
YBR238C::chr2_4:up	477.82	650.165	412.291
YBR239C::chr2_4:up	247.759	280.463	247.375
YBR240C::chr2_4:up	477.82	573.675	549.722
YBR241C::chr2_4:up	867.155	905.132	989.499
YBR242W::chr2_4:up	1008.73	841.39	1154.42
YBR244W::chr2_4:up	707.882	879.635	604.694
YBR245C::chr2_4:up	530.911	509.933	577.208
YBR246W::chr2_4:up	477.82	522.682	302.347
YBR247C::chr2_4:up	300.85	254.967	247.375
YBR248C::chr2_4:up	230.062	395.198	302.347
YBR249C::chr2_4:up	283.153	650.165	467.263
YBR250W::chr2_4:up	265.456	280.463	247.375
YBR251W::chr2_4:up	584.003	764.9	549.722
YBR252W::chr2_4:up	778.67	726.655	357.319
YBR253W::chr2_4:up	318.547	509.933	1071.96
YBR254C::chr2_4:up	513.214	675.662	687.152
YBR255W::chr2_4:up	513.214	535.43	412.291
YBR256C::chr2_4:up	548.608	790.397	879.555
YBR258C::chr2_4:up	247.759	535.43	412.291
YBR259W::chr2_4:up	619.397	739.404	357.319
YBR260C::chr2_4:up	212.365	216.722	109.944
YBR261C::chr2_4:up	318.547	458.94	412.291
YBR262C::chr2_4:up	796.367	994.37	522.236
YBR263W::chr2_4:up	495.517	356.953	247.375
YBR264C::chr2_4:up	460.123	484.437	412.291
YBR265W::chr2_4:up	194.668	216.722	109.944
YBR266C::chr2_4:up	300.85	242.218	302.347
YBR267W::chr2_4:up	849.458	981.622	1016.99
YBR268W::chr2_4:up	1327.28	1670.03	1154.42
YBR269C::chr00_1:up	760.973	573.675	769.61
YBR270C::chr00_16a:up	654.791	637.417	879.555
YBR271W::chr00_1:up	389.335	458.94	384.805
YBR273C::chr00_1:up	318.547	433.443	137.43
YBR275C::chr00_16a:up	247.759	395.198	467.263
YBR276C::chr00_16a:up	371.638	280.463	274.861
YBR277C::chr00_1:up	760.973	420.695	659.666
YBR278W::chr00_1:up	336.244	242.218	302.347
YBR280C::chr00_16a:up	548.608	433.443	577.208
YBR281C::chr00_1:up	194.668	127.483	302.347
YBR282W::chr00_1:up	123.879	395.198	274.861
YBR284W::chr00_1:up	477.82	305.96	549.722
YBR285W::chr00_1:up	371.638	446.192	329.833
YBR286W::chr00_1:up	194.668	114.735	274.861
YBR287W::chr00_16a:up	902.549	803.145	879.555
YBR288C::chr00_16a:up	601.7	599.172	989.499
YBR289W::chr00_16a:up	159.273	293.212	192.403
YBR290W::chr00_1:up	371.638	280.463	522.236
YBR291C::chr00_1:up	159.273	50.9933	329.833
YBR292C::chr00_1:up	407.032	305.96	577.208
YBR294W::chr00_16a:up	389.335	331.457	714.638
YBR296C::chr00_1:up	17.697	382.45	494.749
YBR297W::chr00_1:up	194.668	433.443	714.638
YBR298C::chr00_1:up	141.576	140.232	164.916
YBR301W::chr00_16a:up	1610.43	1007.12	2198.89
YCL001W-A::chr00_1:up	637.094	752.152	577.208
YCL001W::chr3_1:up	601.7	484.437	632.18
YCL002C::chr3_1:up	584.003	356.953	522.236
YCL003W::chr3_1:up	477.82	293.212	439.777
YCL004W::chr3_1:up	247.759	267.715	522.236
YCL006C::chr3_1/chr00_12:up	318.547	267.715	247.375
YCL007C::chr3_1:up	690.185	446.192	769.61
YCL010C::chr3_1:up	53.0911	25.4967	329.833
YCL011C::chr3_1:up	283.153	433.443	439.777
YCL012W::chr3_1:up	566.305	420.695	467.263
YCL013W::chr3_1:up	796.367	726.655	604.694
YCL016C::chr3_1:up	194.668	293.212	302.347
YCL017C::chr3_1:up	176.97	242.218	274.861
YCL023C::chr3_1/chr00_12:up	849.458	866.887	577.208
YCL024W::chr3_1:up	407.032	203.973	412.291
YCL025C::chr3_1:up	353.941	458.94	632.18
YCL026C-A::chr00_16a:up	796.367	382.45	962.013
YCL026C::chr3_1:up	1132.61	1109.11	1154.42
YCL028W::chr3_1:up	530.911	280.463	577.208
YCL029C::chr3_1:up	123.879	152.98	54.9722
YCL030C::chr3_1:up	283.153	497.185	769.61
YCL033C::chr3_1:up	123.879	152.98	164.916
YCL035C::chr00_11:up	283.153	560.927	329.833
YCL038C::chr00_12:up	283.153	178.477	192.403
YCL040W::chr3_1:up	318.547	254.967	329.833
YCL041C::chr00_11:up	584.003	586.424	384.805
YCL041C::chr3_1:up	530.911	420.695	467.263
YCL042W::chr3_1:up	336.244	305.96	219.889
YCL044C::chr3_1:up	672.488	560.927	797.096
YCL045C::chr3_1:up	690.185	599.172	632.18
YCL046W::chr3_1:up	477.82	229.47	247.375
YCL048W::chr3_1:up	566.305	433.443	824.582
YCL049C::chr3_1:up	300.85	344.205	797.096
YCL050C::chr3_1:up	1150.31	1695.53	1209.39
YCL051W::chr3_1:up	318.547	254.967	577.208
YCL052C::chr3_1:up	283.153	305.96	302.347
YCL053C::chr3_1:up	265.456	89.2384	164.916
YCL054W::chr3_1:up	141.576	191.225	192.403
YCL055W::chr3_1:up	778.67	560.927	1016.99
YCL056C::chr3_1:up	796.367	395.198	467.263
YCL057W::chr3_1:up	619.397	484.437	357.319
YCL058C::chr00_12:up	849.458	917.88	1044.47
YCL061C::chr3_1:up	477.82	560.927	494.749
YCL062W::chr3_1:up	389.335	497.185	659.666
YCL063W::chr3_1:up	247.759	318.708	384.805
YCL064C::chr3_1:up	17.697	369.702	192.403
YCL069W::chr3_1:up	513.214	420.695	659.666
YCL074W::chr00_12:up	442.426	624.669	604.694
YCL075W::chr00_12:up	654.791	560.927	797.096
YCL076W::chr00_12:up	690.185	573.675	797.096
YCR001W::chr3_1:up	1079.52	1121.85	824.582
YCR002C::chr3_1:up	300.85	484.437	357.319
YCR003W::chr3_1:up	601.7	497.185	577.208
YCR004C::chr3_1:up	318.547	229.47	439.777
YCR005C::chr3_1:up	637.094	599.172	247.375
YCR006C::chr3_1:up	477.82	216.722	522.236
YCR008W::chr3_1:up	230.062	178.477	357.319
YCR009C::chr3_1:up	407.032	305.96	274.861
YCR010C::chr3_1:up	247.759	229.47	384.805
YCR011C::chr3_1:up	460.123	484.437	439.777
YCR012W::chr00_11:up	141.576	229.47	192.403
YCR012W::chr3_1:up	1238.79	611.92	494.749
YCR013C::chr00_11:up	654.791	662.914	879.555
YCR013C::chr3_1:up	743.276	841.39	604.694
YCR014C::chr3_1:up	690.185	471.688	659.666
YCR015C::chr3_1:up	513.214	331.457	274.861
YCR016W::chr3_1:up	495.517	369.702	412.291
YCR017C::chr3_1:up	1380.37	1274.83	687.152
YCR019W::chr3_1:up	814.064	726.655	1099.44
YCR020C::chr3_1:up	460.123	662.914	742.124
YCR020W-B::chr00_1:up	70.7882	165.728	164.916
YCR021C::chr3_1:up	584.003	497.185	687.152
YCR022C::chr3_1:up	973.338	930.629	962.013
YCR023C::chr3_1:up	265.456	395.198	412.291
YCR024C-A::chr00_1:up	141.576	242.218	302.347
YCR027C::chr00_1:up	318.547	344.205	109.944
YCR028C-A::chr00_16a:up	194.668	101.987	109.944
YCR030C::chr00_16a:up	566.305	318.708	192.403
YCR031C::chr00_1:up	141.576	191.225	192.403
YCR032W::chr00_16a:up	725.579	522.682	329.833
YCR033W::chr00_16a:up	743.276	611.92	549.722
YCR036W::chr00_1:up	1185.7	1223.84	2748.61
YCR043C::chr00_1:up	407.032	356.953	329.833
YCR044C::chr00_1:up	424.729	293.212	384.805
YCR045C::chr00_1:up	460.123	318.708	412.291
YCR048W::chr00_16a:up	194.668	293.212	357.319
YCR049C::chr00_1:up	176.97	280.463	494.749
YCR051W::chr00_1:up	106.182	191.225	54.9722
YCR053W::chr00_16a:up	318.547	267.715	302.347
YCR054C::chr00_16a:up	300.85	433.443	412.291
YCR057C::chr00_16a:up	548.608	497.185	302.347
YCR060W::chr00_16a:up	619.397	739.404	962.013
YCR062W::chr00_16a:up	654.791	573.675	962.013
YCR063W::chr00_1:up	159.273	165.728	109.944
YCR064C::chr00_16a:up	530.911	713.907	632.18
YCR065W::chr00_1:up	230.062	331.457	329.833
YCR066W::chr00_1:up	548.608	688.41	412.291
YCR067C::chr00_16a:up	389.335	509.933	467.263
YCR068W::chr00_1:up	141.576	305.96	467.263
YCR069W::chr00_16a:up	283.153	344.205	357.319
YCR071C::chr00_1:up	159.273	178.477	192.403
YCR073C::chr00_16a:up	1150.31	1007.12	742.124
YCR075C::chr00_16a:up	584.003	369.702	494.749
YCR076C::chr00_1:up	725.579	407.947	742.124
YCR081W::chr00_1:up	247.759	216.722	329.833
YCR083W::chr00_16a:up	424.729	420.695	522.236
YCR084C::chr00_16a:up	566.305	382.45	219.889
YCR085W::chr00_1:up	389.335	433.443	329.833
YCR087W::chr00_1:up	123.879	254.967	192.403
YCR088W::chr00_16a:up	230.062	382.45	357.319
YCR089W::chr00_16a:up	353.941	331.457	137.43
YCR090C::chr00_2:up	212.365	114.735	137.43
YCR091W::chr00_2:up	176.97	267.715	192.403
YCR092C::chr00_2:up	584.003	509.933	852.069
YCR093W::chr00_2:up	159.273	229.47	247.375
YCR094W::chr00_2:up	194.668	318.708	494.749
YCR095C::chr00_14:up	407.032	522.682	412.291
YCR098C::chr00_2:up	353.941	471.688	439.777
YCR099C::chr00_2:up	460.123	344.205	357.319
YCR100C::chr00_2:up	424.729	420.695	494.749
YCR101C::chr00_2:up	300.85	382.45	329.833
YCR102C::chr00_2:up	460.123	280.463	467.263
YCR102W-A::chr00_14:up	690.185	458.94	769.61
YCR105W::chr00_2:up	831.761	675.662	549.722
YCR106W::chr00_2:up	389.335	254.967	274.861
YCR107W::chr00_17a:up	212.365	293.212	302.347
YDL001W::chr4_1:up	778.67	637.417	632.18
YDL002C::chr4_1:up	566.305	688.41	687.152
YDL003W::chr4_1:up	407.032	611.92	632.18
YDL004W::chr4_1:up	937.943	369.702	632.18
YDL005C::chr4_1:up	619.397	726.655	824.582
YDL006W::chr4_1:up	619.397	522.682	879.555
YDL007W::chr4_1:up	460.123	713.907	329.833
YDL008W::chr4_1:up	1185.7	586.424	797.096
YDL009C::chr4_1:up	1185.7	1491.56	962.013
YDL010W::chr4_1:up	1274.19	675.662	687.152
YDL011C::chr4_1:up	619.397	662.914	494.749
YDL012C::chr4_1:up	1044.13	854.139	879.555
YDL013W::chr4_1:up	672.488	471.688	604.694
YDL014W::chr4_1:up	318.547	509.933	164.916
YDL016C::chr4_1:up	619.397	624.669	439.777
YDL018C::chr4_1:up	690.185	611.92	384.805
YDL019C::chr4_1:up	477.82	420.695	632.18
YDL020C::chr4_1:up	477.82	344.205	247.375
YDL022W::chr4_1:up	336.244	254.967	109.944
YDL023C::chr4_1:up	955.64	752.152	467.263
YDL024C::chr4_1:up	1185.7	1007.12	797.096
YDL025C::chr4_1:up	619.397	433.443	577.208
YDL028C::chr4_1:up	566.305	305.96	467.263
YDL029W::chr4_1:up	495.517	318.708	549.722
YDL030W::chr4_1:up	955.64	905.132	989.499
YDL031W::chr00_17a:up	1168.01	1185.6	687.152
YDL032W::chr4_1:up	318.547	101.987	27.4861
YDL033C::chr4_1:up	407.032	611.92	467.263
YDL035C::chr4_1:up	353.941	216.722	109.944
YDL036C::chr4_1:up	1274.19	917.88	1209.39
YDL037C::chr4_1:up	637.094	713.907	412.291
YDL039C::chr4_1:up	353.941	484.437	384.805
YDL040C::chr4_1:up	530.911	344.205	302.347
YDL041W::chr4_1:up	424.729	369.702	604.694
YDL042C::chr4_1:up	477.82	484.437	549.722
YDL044C::chr4_1:up	300.85	433.443	687.152
YDL045C::chr4_1:up	707.882	586.424	632.18
YDL047W::chr4_1:up	389.335	573.675	632.18
YDL048C::chr4_1:up	1044.13	1134.6	1181.9
YDL049C::chr4_1:up	460.123	458.94	549.722
YDL051W::chr4_1:up	247.759	395.198	329.833
YDL052C::chr4_1:up	300.85	407.947	302.347
YDL053C::chr4_1:up	247.759	267.715	329.833
YDL054C::chr4_1:up	477.82	242.218	357.319
YDL055C::chr4_1:up	353.941	446.192	274.861
YDL056W::chr4_1:up	442.426	1007.12	769.61
YDL057W::chr4_1:up	389.335	356.953	549.722
YDL058W::chr00_17a:up	973.338	1058.11	934.527
YDL059C::chr4_1:up	460.123	446.192	274.861
YDL060W::chr4_1:up	778.67	573.675	797.096
YDL061C::chr4_1:up	353.941	573.675	549.722
YDL062W::chr4_1:up	460.123	229.47	577.208
YDL063C::chr4_1:up	654.791	777.649	549.722
YDL064W::chr4_1:up	283.153	522.682	549.722
YDL065C::chr4_1:up	672.488	560.927	467.263
YDL066W::chr4_1:up	424.729	369.702	522.236
YDL067C::chr4_1:up	265.456	356.953	494.749
YDL068W::chr4_1:up	902.549	650.165	632.18
YDL070W::chr4_1:up	637.094	484.437	384.805
YDL071C::chr4_1:up	725.579	560.927	329.833
YDL072C::chr4_1:up	407.032	344.205	302.347
YDL074C::chr4_1:up	902.549	586.424	467.263
YDL075W::chr4_1:up	566.305	790.397	549.722
YDL077C::chr4_1:up	371.638	560.927	219.889
YDL078C::chr4_1:up	495.517	637.417	522.236
YDL079C::chr4_1:up	707.882	803.145	659.666
YDL080C::chr4_1:up	424.729	509.933	384.805
YDL082W::chr4_1:up	477.82	446.192	274.861
YDL083C::chr4_1:up	725.579	522.682	467.263
YDL084W::chr4_1:up	407.032	395.198	384.805
YDL085W::chr4_1:up	513.214	586.424	852.069
YDL086W::chr4_1:up	424.729	458.94	522.236
YDL087C::chr4_1:up	318.547	420.695	494.749
YDL088C::chr4_1:up	690.185	548.179	632.18
YDL090C::chr4_1:up	477.82	369.702	192.403
YDL091C::chr4_1:up	601.7	344.205	302.347
YDL092W::chr4_1:up	477.82	305.96	714.638
YDL093W::chr4_1:up	353.941	280.463	82.4582
YDL094C::chr4_1:up	548.608	407.947	577.208
YDL095W::chr4_1:up	796.367	739.404	769.61
YDL096C::chr4_2:up	1150.31	1121.85	1071.96
YDL098C::chr4_2:up	407.032	777.649	522.236
YDL099W::chr4_2:up	283.153	407.947	412.291
YDL100C::chr4_2:up	477.82	509.933	467.263
YDL101C::chr4_2:up	424.729	293.212	329.833
YDL104C::chr4_2:up	389.335	356.953	357.319
YDL105W::chr4_2:up	530.911	369.702	274.861
YDL106C::chr4_2:up	672.488	548.179	494.749
YDL107W::chr4_2:up	584.003	688.41	797.096
YDL108W::chr4_2:up	849.458	522.682	632.18
YDL109C::chr4_2:up	548.608	688.41	439.777
YDL110C::chr4_2:up	778.67	637.417	412.291
YDL112W::chr4_2:up	654.791	764.9	659.666
YDL113C::chr4_2:up	1132.61	956.125	577.208
YDL114W::chr4_2:up	53.0911	165.728	82.4582
YDL115C::chr4_2:up	176.97	560.927	274.861
YDL116W::chr4_2:up	460.123	369.702	467.263
YDL118W::chr4_2:up	902.549	752.152	1209.39
YDL119C::chr4_2:up	814.064	1045.36	962.013
YDL121C::chr4_2:up	495.517	624.669	522.236
YDL124W::chr4_2:up	424.729	509.933	384.805
YDL125C::chr4_2:up	637.094	611.92	604.694
YDL126C::chr4_2:up	920.246	968.874	687.152
YDL128W::chr4_2:up	760.973	624.669	357.319
YDL129W::chr4_2:up	513.214	420.695	357.319
YDL130W-A::chr00_2:up	760.973	726.655	577.208
YDL130W::chr4_2:up	318.547	356.953	522.236
YDL131W::chr4_2:up	707.882	956.125	632.18
YDL132W::chr4_2:up	884.852	841.39	329.833
YDL133C-A::chr00_14:up	619.397	611.92	659.666
YDL133W::chr4_2:up	672.488	650.165	632.18
YDL134C-A::chr4_2:up	247.759	229.47	219.889
YDL136W::chr4_2:up	672.488	624.669	384.805
YDL137W::chr4_2:up	513.214	701.159	742.124
YDL138W::chr4_2:up	619.397	854.139	494.749
YDL139C::chr4_2:up	566.305	471.688	302.347
YDL141W::chr4_2:up	796.367	548.179	412.291
YDL143W::chr4_2:up	176.97	254.967	82.4582
YDL148C::chr4_2:up	513.214	713.907	632.18
YDL149W::chr4_2:up	371.638	713.907	522.236
YDL151C::chr4_2:up	265.456	229.47	27.4861
YDL152W::chr4_2:up	513.214	267.715	109.944
YDL153C::chr4_2:up	247.759	242.218	329.833
YDL154W::chr4_2:up	1415.76	1172.85	824.582
YDL155W::chr4_2:up	796.367	726.655	879.555
YDL156W::chr4_2:up	902.549	777.649	329.833
YDL157C::chr4_2:up	1008.73	956.125	632.18
YDL158C::chr4_2:up	336.244	548.179	274.861
YDL159W::chr4_2:up	513.214	624.669	659.666
YDL160C::chr4_2:up	477.82	522.682	412.291
YDL162C::chr4_2:up	513.214	356.953	549.722
YDL164C::chr4_2:up	937.943	458.94	797.096
YDL165W::chr4_2:up	743.276	917.88	357.319
YDL166C::chr4_2:up	566.305	739.404	769.61
YDL167C::chr4_2:up	902.549	624.669	659.666
YDL168W::chr4_2:up	831.761	471.688	329.833
YDL169C::chr4_2:up	778.67	739.404	439.777
YDL170W::chr4_2:up	230.062	140.232	109.944
YDL171C::chr4_2:up	353.941	522.682	439.777
YDL172C::chr4_2:up	548.608	420.695	549.722
YDL173W::chr4_2:up	566.305	458.94	577.208
YDL174C::chr4_2:up	831.761	560.927	632.18
YDL175C::chr4_2:up	371.638	280.463	302.347
YDL176W::chr4_2:up	513.214	624.669	412.291
YDL177C::chr4_2:up	831.761	1045.36	797.096
YDL178W::chr4_2:up	831.761	777.649	824.582
YDL179W::chr4_2:up	955.64	828.642	1236.87
YDL180W::chr4_2:up	548.608	573.675	659.666
YDL181W::chr4_2:up	814.064	739.404	1016.99
YDL182W::chr4_2:up	1168.01	1236.59	687.152
YDL183C::chr4_2:up	778.67	790.397	549.722
YDL184C::chr4_2:up	690.185	650.165	549.722
YDL185W::chr4_2:up	778.67	407.947	577.208
YDL186W::chr4_2:up	690.185	624.669	522.236
YDL189W::chr4_2:up	1061.82	1058.11	1511.73
YDL190C::chr4_2:up	3521.71	3072.35	7366.27
YDL194W::chr00_16b:up	760.973	981.622	1236.87
YDL195W::chr4_3:up	353.941	293.212	467.263
YDL197C::chr4_3:up	654.791	726.655	549.722
YDL199C::chr4_3:up	212.365	140.232	192.403
YDL200C::chr4_3:up	601.7	560.927	577.208
YDL201W::chr4_3:up	265.456	267.715	137.43
YDL202W::chr4_3:up	247.759	446.192	467.263
YDL203C::chr4_3:up	601.7	497.185	494.749
YDL205C::chr4_3:up	460.123	293.212	384.805
YDL206W::chr4_3:up	371.638	356.953	219.889
YDL210W::chr4_3:up	530.911	395.198	329.833
YDL212W::chr4_3:up	584.003	420.695	687.152
YDL214C::chr4_3:up	796.367	535.43	769.61
YDL215C::chr4_3:up	778.67	739.404	797.096
YDL216C::chr4_3:up	247.759	344.205	357.319
YDL217C::chr4_3:up	300.85	152.98	494.749
YDL218W::chr4_3:up	283.153	229.47	219.889
YDL221W::chr4_3:up	937.943	892.384	632.18
YDL222C::chr4_3:up	654.791	637.417	714.638
YDL224C::chr4_3:up	336.244	267.715	302.347
YDL225W::chr4_3:up	601.7	458.94	439.777
YDL226C::chr4_3:up	389.335	254.967	357.319
YDL227C::chr4_3:up	318.547	382.45	412.291
YDL229W::chr4_3:up	442.426	790.397	659.666
YDL230W::chr4_3:up	1097.22	739.404	824.582
YDL231C::chr4_3:up	194.668	331.457	412.291
YDL235C::chr4_3:up	336.244	203.973	357.319
YDL237W::chr4_3:up	460.123	356.953	577.208
YDL238C::chr4_3:up	460.123	407.947	384.805
YDL240W::chr4_3:up	513.214	522.682	797.096
YDL241W::chr4_3:up	141.576	178.477	522.236
YDL242W::chr4_3:up	389.335	267.715	164.916
YDL243C::chr4_3:up	230.062	318.708	274.861
YDR001C::chr4_3:up	336.244	165.728	247.375
YDR002W::chr4_3:up	601.7	356.953	27.4861
YDR003W::chr4_3:up	637.094	305.96	274.861
YDR004W::chr4_3:up	548.608	420.695	302.347
YDR005C::chr4_3:up	194.668	216.722	439.777
YDR006C::chr4_3:up	336.244	242.218	164.916
YDR007W::chr00_16b:up	318.547	267.715	494.749
YDR008C::chr4_3:up	70.7882	152.98	82.4582
YDR009W::chr4_3:up	548.608	446.192	274.861
YDR010C::chr4_3:up	371.638	599.172	412.291
YDR011W::chr4_3:up	389.335	229.47	274.861
YDR013W::chr4_3:up	389.335	242.218	329.833
YDR014W::chr4_3:up	353.941	344.205	357.319
YDR015C::chr4_3:up	371.638	382.45	494.749
YDR016C::chr4_3:up	389.335	458.94	687.152
YDR017C::chr4_3:up	353.941	395.198	412.291
YDR018C::chr4_3:up	283.153	254.967	329.833
YDR019C::chr4_3:up	460.123	305.96	522.236
YDR020C::chr4_3:up	300.85	318.708	412.291
YDR021W::chr4_3:up	778.67	854.139	934.527
YDR022C::chr4_3:up	300.85	165.728	329.833
YDR023W::chr4_3:up	601.7	803.145	577.208
YDR024W::chr4_3:up	566.305	446.192	687.152
YDR025W::chr4_3:up	407.032	165.728	302.347
YDR026C::chr4_3:up	300.85	356.953	522.236
YDR027C::chr4_3:up	176.97	140.232	494.749
YDR028C::chr4_3:up	937.943	1109.11	1291.85
YDR029W::chr4_3:up	991.035	994.37	742.124
YDR031W::chr4_3:up	707.882	509.933	522.236
YDR033W::chr4_3:up	353.941	497.185	962.013
YDR034C::chr4_3:up	1663.52	1810.26	1209.39
YDR036C::chr4_3:up	725.579	509.933	494.749
YDR037W::chr4_3:up	495.517	407.947	384.805
YDR041W::chr00_16b:up	230.062	433.443	302.347
YDR042C::chr4_3:up	707.882	548.179	604.694
YDR043C::chr4_3:up	690.185	522.682	989.499
YDR044W::chr4_3:up	1044.13	828.642	934.527
YDR045C::chr4_3:up	920.246	713.907	1319.33
YDR046C::chr4_3:up	530.911	305.96	687.152
YDR047W::chr4_3:up	176.97	407.947	384.805
YDR048C::chr00_16b:up	230.062	267.715	412.291
YDR049W::chr4_4:up	407.032	509.933	549.722
YDR050C::chr00_11:up	176.97	178.477	302.347
YDR051C::chr4_4:up	513.214	650.165	274.861
YDR053W::chr4_4:up	318.547	509.933	467.263
YDR055W::chr4_4:up	672.488	382.45	549.722
YDR059C::chr4_4:up	283.153	446.192	302.347
YDR060W::chr4_4:up	495.517	293.212	247.375
YDR061W::chr4_4:up	814.064	892.384	1511.73
YDR062W::chr4_4:up	336.244	369.702	522.236
YDR063W::chr4_4:up	407.032	407.947	412.291
YDR064W::chr4_4:up	548.608	356.953	604.694
YDR065W::chr4_4:up	424.729	407.947	604.694
YDR066C::chr4_4:up	849.458	1134.6	27.4861
YDR067C::chr4_4:up	654.791	726.655	494.749
YDR068W::chr4_4:up	194.668	650.165	412.291
YDR069C::chr4_4:up	353.941	395.198	247.375
YDR071C::chr00_11:up	424.729	293.212	439.777
YDR072C::chr4_4:up	300.85	395.198	467.263
YDR073W::chr4_4:up	584.003	497.185	604.694
YDR074W::chr00_11:up	460.123	599.172	164.916
YDR076W::chr4_4:up	1327.28	764.9	1484.25
YDR077W::chr4_4:up	141.576	140.232	109.944
YDR078C::chr4_4:up	176.97	152.98	82.4582
YDR079W::chr4_4:up	867.155	981.622	714.638
YDR080W::chr4_4:up	654.791	497.185	632.18
YDR081C::chr4_4:up	442.426	624.669	467.263
YDR083W::chr4_4:up	442.426	369.702	384.805
YDR085C::chr4_4:up	283.153	242.218	412.291
YDR086C::chr4_4:up	1344.98	1211.09	962.013
YDR088C::chr4_4:up	424.729	484.437	219.889
YDR089W::chr4_4:up	637.094	650.165	384.805
YDR090C::chr4_4:up	495.517	484.437	357.319
YDR091C::chr4_4:up	548.608	305.96	247.375
YDR094W::chr4_4:up	495.517	573.675	742.124
YDR095C::chr4_4:up	477.82	471.688	357.319
YDR096W::chr4_4:up	300.85	191.225	302.347
YDR097C::chr4_4:up	637.094	420.695	439.777
YDR098C::chr4_4:up	637.094	509.933	632.18
YDR099W::chr4_4:up	300.85	216.722	412.291
YDR101C::chr4_4:up	637.094	560.927	824.582
YDR102C::chr4_4:up	283.153	344.205	274.861
YDR104C::chr4_4:up	477.82	458.94	357.319
YDR107C::chr4_4:up	495.517	548.179	439.777
YDR108W::chr4_4:up	849.458	662.914	962.013
YDR109C::chr4_4:up	1150.31	777.649	632.18
YDR110W::chr4_4:up	566.305	637.417	522.236
YDR111C::chr4_4:up	495.517	777.649	439.777
YDR112W::chr4_4:up	495.517	458.94	632.18
YDR113C::chr4_4:up	548.608	446.192	329.833
YDR114C::chr4_4:up	654.791	599.172	522.236
YDR115W::chr4_4:up	637.094	395.198	302.347
YDR116C::chr4_4:up	106.182	216.722	164.916
YDR118W::chr4_4:up	318.547	624.669	467.263
YDR119W::chr4_4:up	407.032	318.708	219.889
YDR121W::chr4_4:up	548.608	509.933	577.208
YDR122W::chr4_4:up	584.003	484.437	522.236
YDR123C::chr4_4:up	831.761	1019.87	1264.36
YDR124W::chr4_4:up	584.003	535.43	494.749
YDR125C::chr4_4:up	548.608	471.688	494.749
YDR126W::chr4_4:up	654.791	497.185	412.291
YDR127W::chr4_4:up	460.123	599.172	577.208
YDR128W::chr4_4:up	336.244	433.443	357.319
YDR129C::chr4_4:up	283.153	127.483	27.4861
YDR130C::chr4_4:up	796.367	369.702	659.666
YDR131C::chr4_4:up	460.123	395.198	164.916
YDR132C::chr4_4:up	265.456	395.198	467.263
YDR133C::chr4_4:up	283.153	280.463	219.889
YDR134C::chr4_4:up	760.973	752.152	687.152
YDR135C::chr4_4:up	1592.73	1313.08	1181.9
YDR136C::chr4_4:up	637.094	446.192	302.347
YDR137W::chr4_4:up	336.244	484.437	412.291
YDR138W::chr4_4:up	884.852	815.894	907.041
YDR140W::chr4_4:up	1097.22	790.397	907.041
YDR141C::chr4_4:up	17.697	25.4967	604.694
YDR142C::chr4_4:up	584.003	280.463	357.319
YDR143C::chr4_4:up	902.549	688.41	714.638
YDR144C::chr4_4:up	601.7	420.695	329.833
YDR145W::chr4_4:up	194.668	191.225	109.944
YDR146C::chr4_4:up	601.7	892.384	742.124
YDR147W::chr4_5:up	1309.58	905.132	1401.79
YDR148C::chr4_5:up	389.335	420.695	412.291
YDR149C::chr4_5:up	1097.22	841.39	934.527
YDR150W::chr4_5:up	1185.7	1007.12	879.555
YDR151C::chr4_5:up	937.943	841.39	742.124
YDR152W::chr4_5:up	973.338	994.37	1126.93
YDR153C::chr4_5:up	584.003	866.887	687.152
YDR154C::chr4_5:up	831.761	892.384	549.722
YDR155C::chr4_5:up	937.943	930.629	467.263
YDR156W::chr4_5:up	1114.91	1848.51	1429.28
YDR157W::chr4_5:up	424.729	624.669	467.263
YDR159W::chr4_5:up	867.155	803.145	1099.44
YDR160W::chr4_5:up	495.517	178.477	357.319
YDR161W::chr4_5:up	407.032	726.655	714.638
YDR162C::chr4_5:up	778.67	1070.86	769.61
YDR163W::chr4_5:up	495.517	726.655	852.069
YDR164C::chr4_5:up	530.911	458.94	522.236
YDR166C::chr4_5:up	513.214	509.933	439.777
YDR169C::chr4_5:up	513.214	981.622	687.152
YDR171W::chr4_5:up	690.185	624.669	522.236
YDR172W::chr4_5:up	548.608	739.404	549.722
YDR174W::chr00_14:up	1840.49	1147.35	1154.42
YDR176W::chr4_5:up	123.879	203.973	192.403
YDR177W::chr4_5:up	283.153	331.457	384.805
YDR178W::chr4_5:up	937.943	701.159	219.889
YDR180W::chr4_5:up	336.244	254.967	494.749
YDR181C::chr4_5:up	902.549	1032.62	934.527
YDR184C::chr4_5:up	566.305	407.947	192.403
YDR185C::chr4_5:up	265.456	395.198	302.347
YDR186C::chr4_5:up	619.397	560.927	522.236
YDR187C::chr4_5:up	336.244	318.708	274.861
YDR189W::chr4_5:up	1008.73	790.397	494.749
YDR190C::chr4_5:up	371.638	497.185	329.833
YDR191W::chr4_5:up	389.335	548.179	357.319
YDR192C::chr4_5:up	743.276	458.94	934.527
YDR194C::chr4_5:up	619.397	713.907	852.069
YDR195W::chr4_5:up	619.397	675.662	659.666
YDR196C::chr4_5:up	1486.55	1019.87	907.041
YDR197W::chr4_5:up	566.305	522.682	604.694
YDR198C::chr4_5:up	637.094	586.424	494.749
YDR201W::chr4_5:up	424.729	369.702	659.666
YDR202C::chr00_14:up	1645.83	1223.84	2583.69
YDR203W::chr4_5:up	601.7	484.437	577.208
YDR204W::chr4_5:up	1557.34	1236.59	1951.51
YDR205W::chr00_14:up	513.214	905.132	302.347
YDR207C::chr4_5:up	601.7	242.218	247.375
YDR208W::chr4_5:up	690.185	446.192	219.889
YDR209C::chr4_5:up	849.458	1032.62	604.694
YDR210W::chr4_5:up	548.608	611.92	494.749
YDR211W::chr4_5:up	371.638	254.967	109.944
YDR213W::chr4_5:up	1132.61	637.417	549.722
YDR216W::chr4_5:up	760.973	739.404	962.013
YDR218C::chr4_5:up	867.155	548.179	659.666
YDR219C::chr4_5:up	424.729	433.443	439.777
YDR220C::chr4_5:up	477.82	535.43	879.555
YDR221W::chr4_5:up	760.973	828.642	714.638
YDR222W::chr4_5:up	548.608	701.159	549.722
YDR223W::chr4_5:up	123.879	203.973	219.889
YDR224C::chr4_5:up	300.85	203.973	522.236
YDR227W::chr4_5:up	70.7882	140.232	109.944
YDR229W::chr4_5:up	389.335	267.715	439.777
YDR230W::chr4_5:up	247.759	280.463	329.833
YDR232W::chr4_5:up	176.97	203.973	439.777
YDR234W::chr4_5:up	159.273	280.463	274.861
YDR235W::chr4_5:up	336.244	407.947	329.833
YDR237W::chr4_5:up	212.365	38.245	247.375
YDR238C::chr4_5:up	35.3941	191.225	109.944
YDR239C::chr4_5:up	159.273	140.232	219.889
YDR241W::chr4_5:up	513.214	509.933	632.18
YDR242W::chr00_17a:up	407.032	509.933	769.61
YDR244W::chr4_6:up	389.335	293.212	412.291
YDR246W::chr4_6:up	336.244	701.159	824.582
YDR247W::chr4_6:up	106.182	318.708	54.9722
YDR248C::chr4_6:up	230.062	140.232	192.403
YDR249C::chr4_6:up	336.244	446.192	714.638
YDR250C::chr4_6:up	123.879	152.98	82.4582
YDR251W::chr4_6:up	584.003	535.43	742.124
YDR253C::chr4_6:up	88.4852	242.218	164.916
YDR254W::chr4_6:up	230.062	152.98	137.43
YDR256C::chr4_6:up	106.182	254.967	192.403
YDR259C::chr4_6:up	300.85	293.212	714.638
YDR261C::chr4_6:up	159.273	318.708	329.833
YDR263C::chr4_6:up	88.4852	216.722	164.916
YDR264C::chr4_6:up	1203.4	1236.59	1236.87
YDR268W::chr4_6:up	141.576	191.225	302.347
YDR272W::chr4_6:up	159.273	152.98	109.944
YDR273W::chr4_6:up	424.729	433.443	384.805
YDR275W::chr4_6:up	159.273	242.218	27.4861
YDR277C::chr4_6:up	35.3941	165.728	27.4861
YDR278C::chr4_6:up	106.182	140.232	137.43
YDR281C::chr4_6:up	584.003	344.205	549.722
YDR286C::chr4_6:up	141.576	178.477	219.889
YDR287W::chr4_6:up	336.244	267.715	384.805
YDR288W::chr4_6:up	141.576	216.722	137.43
YDR290W::chr4_6:up	194.668	165.728	247.375
YDR291W::chr4_6:up	389.335	293.212	302.347
YDR293C::chr4_6:up	141.576	203.973	192.403
YDR294C::chr4_6:up	141.576	280.463	274.861
YDR295C::chr4_6:up	123.879	280.463	137.43
YDR296W::chr4_6:up	159.273	331.457	137.43
YDR297W::chr4_6:up	353.941	229.47	247.375
YDR299W::chr4_6:up	353.941	382.45	247.375
YDR300C::chr4_6:up	88.4852	203.973	247.375
YDR302W::chr4_6:up	159.273	216.722	384.805
YDR304C::chr4_6:up	548.608	267.715	412.291
YDR305C::chr4_6:up	123.879	203.973	329.833
YDR306C::chr4_6:up	265.456	178.477	577.208
YDR307W::chr4_6:up	212.365	254.967	219.889
YDR310C::chr4_6:up	247.759	216.722	274.861
YDR311W::chr4_6:up	88.4852	203.973	54.9722
YDR313C::chr4_6:up	123.879	140.232	274.861
YDR314C::chr4_6:up	159.273	203.973	247.375
YDR317W::chr4_6:up	230.062	484.437	687.152
YDR320C::chr4_6:up	495.517	356.953	494.749
YDR321W::chr4_6:up	212.365	293.212	219.889
YDR322W::chr4_6:up	17.697	152.98	82.4582
YDR323C::chr4_6:up	70.7882	152.98	109.944
YDR324C::chr4_6:up	159.273	191.225	219.889
YDR326C::chr00_17a:up	867.155	1070.86	1539.22
YDR327W::chr4_6:up	300.85	280.463	247.375
YDR331W::chr4_6:up	353.941	382.45	357.319
YDR334W::chr4_6:up	88.4852	140.232	164.916
YDR338C::chr4_7:up	389.335	560.927	357.319
YDR344C::chr4_7:up	336.244	395.198	384.805
YDR345C::chr4_7:up	141.576	280.463	54.9722
YDR346C::chr4_7:up	460.123	433.443	384.805
YDR347W::chr4_7:up	300.85	433.443	549.722
YDR349C::chr4_7:up	336.244	548.179	467.263
YDR350C::chr4_7:up	106.182	293.212	137.43
YDR351W::chr4_7:up	212.365	203.973	137.43
YDR352W::chr4_7:up	123.879	203.973	54.9722
YDR354W::chr4_7:up	141.576	254.967	137.43
YDR355C::chr4_7:up	265.456	152.98	164.916
YDR356W::chr4_7:up	159.273	305.96	329.833
YDR359C::chr4_7:up	141.576	152.98	164.916
YDR360W::chr4_7:up	389.335	305.96	494.749
YDR361C::chr4_7:up	123.879	178.477	137.43
YDR362C::chr4_7:up	336.244	382.45	192.403
YDR363W-A::chr00_2:up	283.153	433.443	494.749
YDR365C::chr4_7:up	867.155	560.927	934.527
YDR367W::chr4_7:up	159.273	369.702	274.861
YDR368W::chr4_7:up	106.182	191.225	192.403
YDR370C::chr4_7:up	123.879	178.477	82.4582
YDR371W::chr4_7:up	212.365	229.47	219.889
YDR373W::chr4_7:up	123.879	152.98	164.916
YDR378C::chr4_7:up	265.456	318.708	357.319
YDR380W::chr4_7:up	477.82	599.172	467.263
YDR381W::chr4_7:up	389.335	280.463	247.375
YDR384C::chr4_7:up	867.155	968.874	659.666
YDR386W::chr4_7:up	194.668	216.722	164.916
YDR388W::chr4_7:up	265.456	203.973	219.889
YDR389W::chr4_7:up	194.668	165.728	192.403
YDR390C::chr4_7:up	353.941	344.205	192.403
YDR391C::chr4_7:up	106.182	229.47	164.916
YDR393W::chr4_7:up	283.153	420.695	412.291
YDR394W::chr4_7:up	88.4852	229.47	109.944
YDR395W::chr4_7:up	371.638	586.424	439.777
YDR396W::chr4_7:up	530.911	344.205	329.833
YDR399W::chr4_7:up	601.7	599.172	357.319
YDR400W::chr4_7:up	407.032	535.43	412.291
YDR402C::chr4_7:up	141.576	369.702	137.43
YDR403W::chr4_7:up	407.032	484.437	632.18
YDR404C::chr4_7:up	141.576	191.225	219.889
YDR405W::chr4_7:up	194.668	267.715	329.833
YDR406W::chr4_7:up	212.365	344.205	164.916
YDR407C::chr4_7:up	637.094	535.43	522.236
YDR409W::chr4_7:up	247.759	484.437	412.291
YDR411C::chr4_7:up	442.426	535.43	192.403
YDR412W::chr4_7:up	424.729	382.45	522.236
YDR413C::chr4_7:up	336.244	305.96	357.319
YDR414C::chr4_7:up	283.153	293.212	192.403
YDR416W::chr4_7:up	353.941	484.437	192.403
YDR417C::chr00_17a/chr00_18:up	1203.4	1249.34	852.069
YDR419W::chr4_7:up	2336.01	1670.03	1539.22
YDR420W::chr4_7:up	230.062	140.232	219.889
YDR421W::chr4_7:up	477.82	293.212	302.347
YDR423C::chr4_7:up	477.82	803.145	659.666
YDR424C::chr00_8:up	230.062	356.953	219.889
YDR425W::chr4_7:up	230.062	229.47	439.777
YDR426C::chr4_7:up	247.759	382.45	247.375
YDR427W::chr00_11:up	424.729	267.715	302.347
YDR427W::chr4_7:up	300.85	395.198	439.777
YDR428C::chr4_7:up	141.576	203.973	137.43
YDR429C::chr4_7:up	318.547	356.953	137.43
YDR430C::chr4_7:up	760.973	701.159	522.236
YDR431W::chr4_7:up	460.123	637.417	219.889
YDR432W::chr4_7:up	707.882	713.907	1154.42
YDR433W::chr4_7:up	637.094	484.437	522.236
YDR434W::chr4_7:up	566.305	484.437	687.152
YDR435C::chr4_7:up	247.759	242.218	27.4861
YDR436W::chr4_7:up	548.608	815.894	769.61
YDR437W::chr4_8:up	584.003	917.88	1126.93
YDR439W::chr4_8:up	353.941	637.417	109.944
YDR440W::chr4_8:up	353.941	471.688	467.263
YDR441C::chr4_8:up	371.638	446.192	549.722
YDR442W::chr4_8:up	318.547	254.967	27.4861
YDR444W::chr00_17a:up	265.456	509.933	494.749
YDR445C::chr00_14:up	477.82	726.655	467.263
YDR446W::chr4_8:up	424.729	293.212	274.861
YDR451C::chr4_8:up	1468.85	1555.3	1896.54
YDR452W::chr4_8:up	584.003	637.417	357.319
YDR454C::chr4_8:up	247.759	318.708	302.347
YDR455C::chr4_8:up	336.244	484.437	164.916
YDR457W::chr4_8:up	318.547	305.96	54.9722
YDR460W::chr4_8:up	336.244	471.688	632.18
YDR461W::chr00_17a:up	760.973	866.887	714.638
YDR463W::chr4_8:up	371.638	548.179	302.347
YDR465C::chr4_8:up	247.759	305.96	439.777
YDR466W::chr4_8:up	212.365	522.682	274.861
YDR467C::chr4_8:up	601.7	433.443	549.722
YDR469W::chr4_8:up	495.517	420.695	824.582
YDR473C::chr4_8:up	937.943	701.159	742.124
YDR475C::chr4_8:up	123.879	229.47	164.916
YDR476C::chr4_8:up	336.244	535.43	522.236
YDR477W::chr4_8:up	760.973	968.874	467.263
YDR478W::chr4_8:up	1769.7	1287.58	1841.57
YDR479C::chr4_8:up	548.608	407.947	357.319
YDR480W::chr4_8:up	495.517	203.973	577.208
YDR481C::chr4_8:up	88.4852	509.933	54.9722
YDR482C::chr4_8:up	530.911	828.642	742.124
YDR484W::chr4_8:up	230.062	127.483	109.944
YDR486C::chr4_8:up	318.547	764.9	0
YDR487C::chr4_8:up	283.153	344.205	302.347
YDR488C::chr4_8:up	477.82	395.198	412.291
YDR489W::chr4_8:up	247.759	535.43	302.347
YDR490C::chr4_8:up	371.638	573.675	604.694
YDR491C::chr4_8:up	353.941	369.702	164.916
YDR493W::chr00_17a:up	743.276	930.629	824.582
YDR494W::chr4_8:up	318.547	331.457	302.347
YDR495C::chr4_8:up	477.82	688.41	439.777
YDR496C::chr4_8:up	283.153	216.722	219.889
YDR497C::chr4_8:up	283.153	369.702	164.916
YDR498C::chr00_17a:up	265.456	458.94	357.319
YDR499W::chr4_8:up	566.305	548.179	522.236
YDR500C::chr00_17a:up	123.879	216.722	109.944
YDR502C::chr00_17a:up	584.003	497.185	522.236
YDR503C::chr4_8:up	424.729	688.41	632.18
YDR504C::chr4_8:up	230.062	280.463	439.777
YDR506C::chr00_17a:up	460.123	573.675	549.722
YDR509W::chr4_8:up	477.82	662.914	577.208
YDR510W::chr4_8:up	230.062	254.967	357.319
YDR511W::chr4_8:up	849.458	637.417	439.777
YDR512C::chr00_17a:up	141.576	344.205	164.916
YDR512C::chr4_8:up	619.397	930.629	549.722
YDR513W::chr4_8:up	566.305	522.682	577.208
YDR514C::chr4_8:up	849.458	854.139	879.555
YDR515W::chr00_17a:up	707.882	1032.62	467.263
YDR517W::chr4_8:up	265.456	318.708	109.944
YDR519W::chr4_8:up	247.759	420.695	329.833
YDR520C::chr4_8:up	336.244	293.212	522.236
YDR521W::chr4_8:up	778.67	854.139	467.263
YDR522C::chr4_8:up	937.943	1070.86	549.722
YDR523C::chr4_8:up	619.397	841.39	714.638
YDR524C::chr4_8:up	601.7	739.404	412.291
YDR525W-A::chr00_2:up	353.941	216.722	82.4582
YDR525W::chr4_8:up	336.244	548.179	219.889
YDR526C::chr00_17a:up	176.97	331.457	137.43
YDR527W::chr4_8:up	902.549	1045.36	467.263
YDR528W::chr4_8:up	902.549	446.192	494.749
YDR529C::chr4_8:up	690.185	841.39	852.069
YDR530C::chr4_8:up	601.7	471.688	439.777
YDR531W::chr4_8:up	424.729	229.47	357.319
YDR532C::chr4_8:up	353.941	446.192	577.208
YDR533C::chr4_8:up	920.246	662.914	824.582
YDR534C::chr4_8:up	584.003	688.41	687.152
YDR536W::chr00_2:up	318.547	305.96	274.861
YDR537C::chr00_14:up	212.365	293.212	439.777
YDR538W::chr00_2:up	601.7	471.688	1044.47
YDR539W::chr00_2:up	300.85	395.198	577.208
YDR541C::chr00_2:up	300.85	178.477	302.347
YEL001C::chr5_2:up	1468.85	1019.87	1099.44
YEL002C::chr5_2:up	601.7	752.152	714.638
YEL003W::chr5_2:up	495.517	395.198	824.582
YEL004W::chr5_2:up	884.852	662.914	659.666
YEL005C::chr5_2:up	300.85	624.669	687.152
YEL006W::chr5_2:up	88.4852	140.232	247.375
YEL008W::chr5_2:up	743.276	701.159	577.208
YEL009C::chr5_2:up	1114.91	943.377	1236.87
YEL010W::chr5_2:up	796.367	407.947	522.236
YEL012W::chr00_10:up	353.941	203.973	192.403
YEL013W::chr5_2:up	389.335	216.722	329.833
YEL014C::chr5_2:up	300.85	305.96	137.43
YEL015W::chr5_2:up	584.003	420.695	329.833
YEL016C::chr5_2:up	884.852	420.695	549.722
YEL017C-A::chr5_2:up	831.761	905.132	824.582
YEL017W::chr5_2:up	601.7	446.192	439.777
YEL018W::chr5_2:up	601.7	356.953	494.749
YEL019C::chr5_2:up	424.729	611.92	384.805
YEL023C::chr5_2:up	725.579	688.41	824.582
YEL024W::chr5_2:up	619.397	395.198	577.208
YEL025C::chr5_2:up	283.153	267.715	494.749
YEL026W::chr5_2:up	230.062	586.424	329.833
YEL027W::chr5_2:up	672.488	650.165	522.236
YEL028W::chr5_2:up	159.273	165.728	54.9722
YEL029C::chr5_2:up	389.335	331.457	412.291
YEL031W::chr5_2:up	495.517	624.669	549.722
YEL032W::chr5_2:up	371.638	293.212	192.403
YEL034W::chr00_8:up	867.155	242.218	439.777
YEL036C::chr5_2:up	353.941	344.205	109.944
YEL037C::chr5_2:up	353.941	701.159	467.263
YEL038W::chr5_2:up	336.244	395.198	522.236
YEL039C::chr5_2:up	442.426	305.96	357.319
YEL040W::chr5_2:up	300.85	471.688	549.722
YEL042W::chr5_2:up	141.576	152.98	247.375
YEL043W::chr5_2:up	442.426	254.967	467.263
YEL044W::chr5_2:up	495.517	331.457	302.347
YEL047C::chr5_2:up	1061.82	1198.34	1154.42
YEL048C::chr5_2:up	460.123	446.192	687.152
YEL049W::chr5_2:up	884.852	497.185	412.291
YEL050C::chr5_2:up	743.276	879.635	494.749
YEL051W::chr5_2:up	230.062	178.477	137.43
YEL053C::chr5_2:up	141.576	191.225	164.916
YEL054C::chr5_2:up	371.638	267.715	357.319
YEL055C::chr5_2:up	831.761	675.662	769.61
YEL056W::chr5_2:up	867.155	535.43	549.722
YEL057C::chr5_2:up	212.365	191.225	219.889
YEL058W::chr5_2:up	955.64	752.152	549.722
YEL059W::chr5_2:up	743.276	522.682	604.694
YEL060C::chr5_2:up	212.365	344.205	274.861
YEL061C::chr5_2:up	353.941	395.198	412.291
YEL062W::chr5_2:up	283.153	280.463	467.263
YEL063C::chr5_2:up	123.879	267.715	82.4582
YEL065W::chr5_2:up	106.182	203.973	192.403
YEL066W::chr5_2:up	1256.49	752.152	742.124
YEL067C::chr5_2:up	389.335	535.43	82.4582
YEL068C::chr5_2:up	460.123	713.907	797.096
YEL071W::chr5_2:up	814.064	892.384	632.18
YEL072W::chr5_2:up	902.549	892.384	714.638
YER001W::chr5_2:up	884.852	573.675	742.124
YER003C::chr5_2:up	1309.58	815.894	989.499
YER004W::chr5_2:up	477.82	535.43	549.722
YER005W::chr5_2:up	814.064	611.92	714.638
YER006W::chr5_2:up	336.244	446.192	549.722
YER007W::chr5_2:up	796.367	841.39	962.013
YER009W::chr5_2:up	389.335	305.96	219.889
YER010C::chr5_2:up	654.791	535.43	824.582
YER011W::chr5_2:up	389.335	573.675	357.319
YER013W::chr5_2:up	88.4852	165.728	192.403
YER014W::chr5_2:up	318.547	305.96	357.319
YER016W::chr5_3:up	760.973	828.642	714.638
YER017C::chr5_3:up	619.397	611.92	659.666
YER018C::chr5_3:up	495.517	331.457	494.749
YER019C-A::chr5_3:up	159.273	293.212	384.805
YER019W::chr5_3:up	707.882	752.152	742.124
YER020W::chr5_3:up	424.729	356.953	137.43
YER021W::chr5_3:up	477.82	624.669	604.694
YER022W::chr5_3:up	796.367	764.9	907.041
YER023W::chr5_3:up	778.67	956.125	769.61
YER024W::chr5_3:up	106.182	331.457	302.347
YER027C::chr00_11:up	548.608	560.927	274.861
YER027C::chr5_3:up	300.85	331.457	164.916
YER028C::chr5_3:up	778.67	803.145	384.805
YER030W::chr5_3:up	442.426	599.172	247.375
YER032W::chr5_3:up	601.7	509.933	357.319
YER033C::chr5_3:up	212.365	267.715	384.805
YER034W::chr5_3:up	654.791	777.649	632.18
YER035W::chr5_3:up	743.276	650.165	604.694
YER036C::chr5_3:up	1150.31	892.384	632.18
YER037W::chr00_11:up	318.547	624.669	687.152
YER037W::chr5_3:up	884.852	688.41	687.152
YER038C::chr5_3:up	849.458	777.649	1044.47
YER038W-A::chr5_3:up	566.305	548.179	549.722
YER039C-A::chr00_2:up	566.305	675.662	302.347
YER040W::chr5_3:up	513.214	548.179	412.291
YER041W::chr5_3:up	194.668	407.947	632.18
YER042W::chr5_3:up	194.668	242.218	137.43
YER043C::chr5_3:up	442.426	152.98	357.319
YER044C-A::chr5_3:up	707.882	548.179	714.638
YER044C::chr5_3:up	371.638	509.933	247.375
YER045C::chr5_3:up	654.791	662.914	632.18
YER046W-A::chr5_3:up	371.638	433.443	164.916
YER046W::chr00_10:up	389.335	573.675	247.375
YER048C::chr5_3:up	566.305	662.914	439.777
YER048W-A::chr00_2:up	1079.52	777.649	1484.25
YER049W::chr5_3:up	831.761	688.41	769.61
YER050C::chr5_3:up	318.547	165.728	549.722
YER051W::chr5_3:up	230.062	216.722	384.805
YER052C::chr5_3:up	442.426	203.973	412.291
YER054C::chr5_3:up	530.911	344.205	659.666
YER055C::chr5_3:up	300.85	165.728	384.805
YER056C-A::chr5_3:up	530.911	509.933	549.722
YER056C::chr5_3:up	867.155	739.404	549.722
YER057C::chr5_3:up	1097.22	892.384	687.152
YER058W::chr5_3:up	513.214	701.159	604.694
YER059W::chr5_3:up	601.7	458.94	439.777
YER060W::chr5_3:up	495.517	344.205	604.694
YER061C::chr5_3:up	442.426	611.92	439.777
YER062C::chr5_3:up	937.943	803.145	742.124
YER063W::chr00_10:up	1097.22	854.139	1044.47
YER064C::chr00_8:up	230.062	267.715	439.777
YER065C::chr5_3:up	230.062	229.47	164.916
YER066W::chr00_10:up	159.273	331.457	274.861
YER067C-A::chr5_3:up	407.032	509.933	357.319
YER067W::chr5_3:up	176.97	178.477	192.403
YER068C-A::chr5_3:up	460.123	356.953	164.916
YER068W::chr5_3:up	513.214	548.179	357.319
YER069W::chr5_3:up	566.305	497.185	384.805
YER070W::chr5_3:up	424.729	356.953	302.347
YER071C::chr5_3:up	566.305	497.185	522.236
YER073W::chr5_3:up	920.246	522.682	467.263
YER074W::chr5_3:up	619.397	433.443	357.319
YER075C::chr5_3:up	1008.73	624.669	742.124
YER077C::chr00_8:up	247.759	242.218	577.208
YER078C::chr00_8:up	760.973	675.662	577.208
YER079W::chr5_3:up	194.668	267.715	164.916
YER080W::chr5_3:up	460.123	535.43	274.861
YER081W::chr5_3:up	584.003	395.198	302.347
YER082C::chr5_3:up	902.549	968.874	989.499
YER083C::chr5_3:up	371.638	497.185	412.291
YER084W::chr5_3:up	442.426	407.947	247.375
YER085C::chr5_3:up	389.335	433.443	247.375
YER086W::chr5_3:up	159.273	382.45	274.861
YER087C-A::chr5_3:up	300.85	458.94	494.749
YER087W::chr5_3:up	353.941	458.94	329.833
YER088C::chr00_8:up	530.911	650.165	494.749
YER089C::chr00_17a:up	584.003	548.179	659.666
YER090W::chr00_8:up	637.094	713.907	522.236
YER091C-A::chr00_2:up	743.276	471.688	549.722
YER092W::chr00_8:up	106.182	216.722	274.861
YER093C-A::chr00_8:up	247.759	318.708	247.375
YER095W::chr00_8:up	495.517	586.424	522.236
YER096W::chr00_8:up	212.365	305.96	137.43
YER097W::chr00_8:up	194.668	216.722	219.889
YER098W::chr00_8:up	318.547	344.205	659.666
YER101C::chr00_5:up	300.85	382.45	192.403
YER103W::chr00_5:up	123.879	152.98	164.916
YER106W::chr00_5:up	530.911	509.933	357.319
YER107C::chr00_5:up	566.305	382.45	384.805
YER108C::chr00_5:up	796.367	599.172	467.263
YER109C::chr00_5:up	654.791	586.424	742.124
YER110C::chr00_5:up	690.185	484.437	742.124
YER111C::chr00_5:up	584.003	497.185	412.291
YER112W::chr00_5:up	955.64	815.894	907.041
YER113C::chr00_5:up	566.305	599.172	522.236
YER114C::chr00_5:up	265.456	229.47	192.403
YER115C::chr00_5:up	318.547	356.953	247.375
YER116C::chr00_5:up	265.456	216.722	247.375
YER117W::chr00_5:up	300.85	114.735	27.4861
YER118C::chr00_5:up	141.576	242.218	164.916
YER119C-A::chr00_5:up	300.85	318.708	494.749
YER121W::chr00_5:up	353.941	229.47	494.749
YER123W::chr00_5:up	548.608	458.94	494.749
YER124C::chr00_5:up	371.638	382.45	549.722
YER126C::chr00_5:up	212.365	305.96	247.375
YER127W::chr00_5:up	619.397	662.914	604.694
YER128W::chr00_5:up	495.517	395.198	714.638
YER129W::chr00_5:up	584.003	369.702	302.347
YER130C::chr00_5:up	106.182	242.218	329.833
YER131W::chr00_5:up	212.365	114.735	109.944
YER132C::chr00_5:up	513.214	331.457	329.833
YER133W::chr00_5:up	176.97	293.212	82.4582
YER134C::chr00_5:up	70.7882	331.457	219.889
YER135C::chr00_5:up	230.062	369.702	604.694
YER136W::chr00_5:up	247.759	229.47	109.944
YER137C::chr00_5:up	530.911	548.179	769.61
YER140W::chr00_5:up	176.97	356.953	192.403
YER141W::chr00_5:up	212.365	331.457	247.375
YER142C::chr00_5:up	141.576	152.98	82.4582
YER144C::chr00_2:up	300.85	305.96	219.889
YER145C::chr00_5:up	371.638	344.205	714.638
YER146W::chr00_5:up	194.668	216.722	82.4582
YER149C::chr00_5:up	637.094	254.967	687.152
YER150W::chr00_5:up	300.85	254.967	274.861
YER151C::chr00_5:up	141.576	229.47	109.944
YER153C::chr00_5:up	123.879	280.463	109.944
YER154W::chr00_5:up	265.456	267.715	247.375
YER155C::chr00_5:up	300.85	242.218	439.777
YER156C::chr00_5:up	424.729	446.192	604.694
YER157W::chr00_5:up	300.85	127.483	219.889
YER158C::chr00_5:up	477.82	458.94	494.749
YER159C::chr00_5:up	884.852	458.94	687.152
YER161C::chr00_5:up	424.729	305.96	329.833
YER163C::chr00_5:up	548.608	535.43	384.805
YER164W::chr00_5:up	424.729	548.179	522.236
YER165W::chr00_5:up	265.456	458.94	109.944
YER166W::chr00_5:up	442.426	305.96	384.805
YER167W::chr00_5:up	283.153	280.463	549.722
YER168C::chr00_5:up	247.759	76.49	27.4861
YER169W::chr00_5:up	495.517	522.682	329.833
YER170W::chr00_5:up	371.638	242.218	192.403
YER171W::chr00_5:up	460.123	930.629	907.041
YER172C::chr00_5:up	955.64	841.39	687.152
YER173W::chr00_5:up	495.517	420.695	439.777
YER174C::chr00_5:up	1132.61	854.139	494.749
YER178W::chr00_5:up	283.153	267.715	577.208
YER179W::chr00_5:up	300.85	305.96	219.889
YER180C::chr00_5:up	353.941	471.688	412.291
YER181C::chr00_5:up	283.153	280.463	357.319
YER182W::chr00_5:up	283.153	369.702	274.861
YER183C::chr00_5:up	230.062	191.225	302.347
YER184C::chr00_5:up	283.153	497.185	329.833
YER185W::chr00_5:up	619.397	471.688	742.124
YER187W::chr00_5:up	230.062	203.973	412.291
YFL001W::chr00_17a:up	70.7882	165.728	164.916
YFL003C::chr00_17a:up	743.276	611.92	632.18
YFL004W::chr00_17a:up	707.882	956.125	632.18
YFL005W::chr00_17a:up	318.547	471.688	357.319
YFL007W::chr00_17a:up	336.244	331.457	274.861
YFL008W::chr6_1:up	300.85	293.212	274.861
YFL009W::chr6_1:up	513.214	586.424	549.722
YFL010C::chr00_17a:up	371.638	382.45	329.833
YFL011W::chr6_1:up	619.397	688.41	632.18
YFL013C::chr00_17a:up	265.456	191.225	192.403
YFL013W-A::chr00_15:up	106.182	101.987	302.347
YFL014W::chr00_15:up	584.003	599.172	632.18
YFL015C::chr6_1:up	194.668	254.967	247.375
YFL016C::chr00_17a:up	176.97	382.45	274.861
YFL018C::chr6_1:up	424.729	382.45	439.777
YFL019C::chr00_15:up	212.365	407.947	494.749
YFL021W::chr6_1:up	619.397	548.179	577.208
YFL022C::chr6_1:up	902.549	777.649	522.236
YFL024C::chr6_1:up	88.4852	152.98	164.916
YFL026W::chr6_1:up	300.85	369.702	274.861
YFL027C::chr6_1:up	584.003	433.443	329.833
YFL028C::chr6_1:up	159.273	140.232	54.9722
YFL029C::chr00_18:up	1309.58	917.88	1566.71
YFL030W::chr6_1:up	1185.7	905.132	632.18
YFL031W::chr6_1:up	619.397	369.702	329.833
YFL033C::chr00_17a/chr00_18:up	548.608	662.914	742.124
YFL034C-A::chr00_2:up	336.244	471.688	687.152
YFL034W::chr6_1:up	495.517	484.437	467.263
YFL035C-A::chr6_1:up	353.941	407.947	302.347
YFL035C::chr6_1:up	778.67	573.675	329.833
YFL037W::chr6_1:up	530.911	356.953	714.638
YFL038C::chr6_1:up	389.335	548.179	549.722
YFL040W::chr6_1:up	743.276	866.887	907.041
YFL041W::chr6_1:up	849.458	471.688	522.236
YFL042C::chr00_15:up	601.7	433.443	494.749
YFL043C::chr6_1:up	867.155	790.397	1346.82
YFL044C::chr6_1:up	212.365	216.722	384.805
YFL045C::chr6_1:up	584.003	407.947	329.833
YFL046W::chr6_1:up	584.003	573.675	852.069
YFL047W::chr6_1:up	389.335	420.695	247.375
YFL049W::chr6_1:up	654.791	395.198	604.694
YFL050C::chr6_1:up	530.911	407.947	412.291
YFL051C::chr6_1:up	495.517	433.443	577.208
YFL052W::chr6_1:up	389.335	165.728	164.916
YFL053W::chr6_1:up	212.365	293.212	192.403
YFL054C::chr6_1:up	513.214	662.914	632.18
YFL055W::chr6_1:up	672.488	828.642	604.694
YFL056C::chr6_1:up	265.456	305.96	384.805
YFL063W::chr00_18:up	353.941	471.688	549.722
YFR001W::chr6_1:up	849.458	458.94	467.263
YFR002W::chr00_18:up	513.214	688.41	549.722
YFR003C::chr6_1:up	460.123	356.953	274.861
YFR004W::chr6_1:up	371.638	318.708	192.403
YFR006W::chr6_1:up	778.67	484.437	412.291
YFR007W::chr6_1:up	407.032	305.96	494.749
YFR009W::chr6_1:up	1291.88	688.41	797.096
YFR011C::chr00_16b:up	17.697	675.662	659.666
YFR011C::chr6_1:up	212.365	369.702	439.777
YFR012W::chr6_1:up	619.397	803.145	522.236
YFR013W::chr00_16b:up	230.062	165.728	137.43
YFR014C::chr6_1:up	70.7882	191.225	137.43
YFR015C::chr6_1:up	548.608	522.682	549.722
YFR017C::chr6_1:up	707.882	509.933	604.694
YFR018C::chr6_1:up	194.668	305.96	302.347
YFR019W::chr00_15:up	672.488	854.139	879.555
YFR020W::chr6_1:up	707.882	866.887	604.694
YFR022W::chr6_1:up	1132.61	1147.35	1236.87
YFR023W::chr6_1:up	247.759	280.463	412.291
YFR024C-A::chr6_1:up	265.456	471.688	494.749
YFR024C::chr00_15:up	707.882	662.914	879.555
YFR025C::chr00_15:up	88.4852	242.218	54.9722
YFR026C::chr6_1:up	831.761	662.914	632.18
YFR027W::chr6_1:up	230.062	548.179	329.833
YFR028C::chr00_15:up	123.879	203.973	109.944
YFR029W::chr00_15:up	760.973	637.417	577.208
YFR030W::chr00_15:up	247.759	191.225	384.805
YFR031C-A::chr6_1:up	353.941	611.92	247.375
YFR031C::chr00_15:up	849.458	548.179	934.527
YFR032C-A::chr00_2:up	194.668	203.973	329.833
YFR032C::chr00_2:up	1521.95	650.165	769.61
YFR033C::chr00_2:up	371.638	866.887	852.069
YFR034C::chr00_2:up	548.608	305.96	549.722
YFR035C::chr00_2:up	477.82	446.192	439.777
YFR036W::chr00_2:up	760.973	662.914	302.347
YFR037C::chr00_2:up	619.397	382.45	54.9722
YFR039C::chr00_14:up	637.094	739.404	769.61
YFR040W::chr00_2:up	283.153	509.933	302.347
YFR041C::chr00_2:up	106.182	191.225	274.861
YFR042W::chr00_2:up	707.882	458.94	632.18
YFR044C::chr00_2:up	725.579	841.39	687.152
YFR045W::chr00_2:up	123.879	254.967	192.403
YFR046C::chr00_2:up	814.064	803.145	549.722
YFR047C::chr00_2:up	353.941	356.953	714.638
YFR050C::chr00_2:up	637.094	624.669	439.777
YFR051C::chr00_2:up	566.305	382.45	137.43
YFR052W::chr00_2:up	318.547	280.463	164.916
YFR053C::chr00_2:up	212.365	242.218	109.944
YFR054C::chr00_2:up	442.426	382.45	467.263
YFR056C::chr00_2:up	920.246	815.894	439.777
YGL001C::chr7_1:up	973.338	611.92	1429.28
YGL004C::chr7_1:up	566.305	611.92	604.694
YGL005C::chr7_1:up	513.214	12.7483	632.18
YGL006W::chr7_1:up	123.879	152.98	82.4582
YGL007W::chr7_1:up	672.488	675.662	879.555
YGL008C::chr7_1:up	283.153	318.708	192.403
YGL009C::chr7_1:up	778.67	458.94	494.749
YGL010W::chr7_1:up	389.335	509.933	412.291
YGL011C::chr7_1:up	690.185	344.205	494.749
YGL013C::chr7_1:up	955.64	1032.62	1291.85
YGL014W::chr7_1:up	725.579	484.437	219.889
YGL016W::chr7_1:up	884.852	573.675	412.291
YGL017W::chr7_1:up	530.911	446.192	632.18
YGL018C::chr7_1:up	548.608	701.159	907.041
YGL020C::chr7_1:up	407.032	458.94	219.889
YGL021W::chr7_1:up	477.82	382.45	357.319
YGL022W::chr7_1:up	584.003	650.165	632.18
YGL023C::chr7_1:up	371.638	267.715	412.291
YGL024W::chr7_1:up	601.7	637.417	742.124
YGL025C::chr7_1:up	1274.19	1657.28	2088.94
YGL026C::chr7_1:up	371.638	407.947	274.861
YGL028C::chr7_1:up	672.488	650.165	412.291
YGL029W::chr7_1:up	283.153	267.715	357.319
YGL032C::chr7_1:up	212.365	203.973	137.43
YGL034C::chr7_1:up	353.941	968.874	852.069
YGL036W::chr7_1:up	1097.22	1007.12	1044.47
YGL037C::chr7_1:up	814.064	1134.6	824.582
YGL038C::chr7_1:up	371.638	254.967	329.833
YGL039W::chr7_1:up	353.941	293.212	357.319
YGL040C::chr7_1:up	955.64	752.152	852.069
YGL042C::chr7_1:up	1132.61	548.179	494.749
YGL043W::chr7_1:up	407.032	254.967	247.375
YGL045W::chr7_1:up	336.244	382.45	302.347
YGL046W::chr7_1:up	300.85	216.722	164.916
YGL048C::chr7_1:up	920.246	548.179	714.638
YGL049C::chr7_1:up	265.456	254.967	384.805
YGL050W::chr7_1:up	460.123	305.96	384.805
YGL051W::chr7_1:up	194.668	114.735	82.4582
YGL053W::chr7_1:up	424.729	446.192	467.263
YGL054C::chr7_1:up	530.911	535.43	467.263
YGL055W::chr7_1:up	477.82	267.715	219.889
YGL056C::chr7_1:up	477.82	662.914	412.291
YGL057C::chr7_1:up	920.246	917.88	577.208
YGL058W::chr7_1:up	407.032	407.947	439.777
YGL059W::chr7_1:up	796.367	509.933	384.805
YGL061C::chr7_1:up	477.82	458.94	219.889
YGL062W::chr7_1:up	690.185	777.649	962.013
YGL063W::chr7_1:up	955.64	943.377	1044.47
YGL064C::chr7_1:up	867.155	841.39	879.555
YGL065C::chr7_1:up	619.397	535.43	934.527
YGL066W::chr7_1:up	530.911	318.708	247.375
YGL067W::chr7_1:up	389.335	433.443	329.833
YGL070C::chr7_1:up	371.638	573.675	1044.47
YGL071W::chr7_1:up	265.456	331.457	274.861
YGL072C::chr7_1:up	141.576	229.47	137.43
YGL074C::chr7_1:up	637.094	611.92	907.041
YGL075C::chr7_1:up	389.335	382.45	357.319
YGL076C::chr7_1:up	283.153	229.47	357.319
YGL077C::chr7_1:up	35.3941	165.728	54.9722
YGL078C::chr7_1:up	300.85	293.212	274.861
YGL079W::chr7_1:up	672.488	573.675	412.291
YGL080W::chr7_1:up	760.973	803.145	769.61
YGL081W::chr7_1:up	548.608	739.404	439.777
YGL082W::chr7_1:up	654.791	726.655	494.749
YGL083W::chr7_1:up	884.852	841.39	769.61
YGL084C::chr7_1:up	973.338	586.424	714.638
YGL085W::chr7_1:up	530.911	905.132	687.152
YGL086W::chr7_1:up	743.276	1070.86	989.499
YGL087C::chr7_1:up	1398.07	1555.3	769.61
YGL088W::chr7_1:up	690.185	828.642	934.527
YGL089C::chr7_1:up	884.852	917.88	797.096
YGL090W::chr7_1:up	831.761	879.635	797.096
YGL091C::chr7_1:up	690.185	624.669	577.208
YGL092W::chr7_1:up	1168.01	905.132	1071.96
YGL093W::chr7_1:up	584.003	688.41	742.124
YGL094C::chr7_1:up	1628.13	1886.75	2116.43
YGL095C::chr7_1:up	2689.95	1759.27	3820.57
YGL096W::chr7_1:up	1504.25	1147.35	852.069
YGL097W::chr7_1/chr00_17a:up	2247.52	1733.77	2116.43
YGL098W::chr7_2:up	513.214	407.947	659.666
YGL101W::chr7_2:up	973.338	624.669	577.208
YGL102C::chr7_2:up	1946.68	1440.56	2831.07
YGL103W::chr7_2:up	336.244	548.179	522.236
YGL107C::chr7_2:up	424.729	815.894	934.527
YGL110C::chr7_2:up	955.64	803.145	1016.99
YGL111W::chr7_2:up	389.335	191.225	109.944
YGL112C::chr7_2:up	778.67	905.132	687.152
YGL113W::chr7_2:up	743.276	586.424	329.833
YGL114W::chr7_2:up	283.153	458.94	439.777
YGL115W::chr7_2:up	495.517	305.96	439.777
YGL116W::chr7_2:up	991.035	1262.09	2116.43
YGL117W::chr7_2:up	407.032	242.218	384.805
YGL118C::chr7_2:up	548.608	675.662	714.638
YGL121C::chr7_2:up	1221.1	892.384	797.096
YGL122C::chr7_2:up	920.246	815.894	659.666
YGL123W::chr7_2:up	194.668	471.688	137.43
YGL124C::chr7_2:up	584.003	509.933	549.722
YGL126W::chr7_2:up	672.488	458.94	659.666
YGL127C::chr7_2:up	654.791	420.695	522.236
YGL128C::chr7_2:up	460.123	548.179	439.777
YGL131C::chr7_2:up	495.517	446.192	247.375
YGL132W::chr7_2:up	619.397	688.41	687.152
YGL133W::chr7_2:up	654.791	624.669	797.096
YGL135W::chr7_2:up	884.852	586.424	577.208
YGL136C::chr7_2:up	194.668	471.688	329.833
YGL137W::chr7_2:up	230.062	267.715	164.916
YGL138C::chr7_2:up	247.759	509.933	247.375
YGL139W::chr7_2:up	371.638	331.457	687.152
YGL140C::chr7_2:up	495.517	573.675	742.124
YGL141W::chr7_2:up	920.246	484.437	659.666
YGL142C::chr7_2:up	460.123	305.96	247.375
YGL143C::chr7_2:up	424.729	203.973	302.347
YGL146C::chr7_2:up	566.305	688.41	494.749
YGL147C::chr7_2:up	283.153	165.728	467.263
YGL149W::chr7_2:up	548.608	535.43	522.236
YGL150C::chr7_2:up	513.214	242.218	357.319
YGL151W::chr7_2:up	548.608	599.172	742.124
YGL152C::chr7_2:up	743.276	509.933	412.291
YGL153W::chr7_2:up	495.517	599.172	577.208
YGL154C::chr7_2:up	991.035	739.404	769.61
YGL155W::chr7_2:up	424.729	420.695	577.208
YGL156W::chr7_2:up	513.214	599.172	467.263
YGL157W::chr7_2:up	654.791	369.702	494.749
YGL158W::chr7_2:up	477.82	624.669	577.208
YGL159W::chr7_2:up	477.82	369.702	742.124
YGL161C::chr7_2:up	530.911	395.198	329.833
YGL162W::chr7_2:up	1079.52	790.397	714.638
YGL163C::chr7_2:up	566.305	509.933	907.041
YGL164C::chr7_2:up	495.517	331.457	357.319
YGL165C::chr7_2:up	1185.7	1568.05	1456.76
YGL166W::chr7_2:up	513.214	395.198	384.805
YGL167C::chr7_2:up	1840.49	1975.99	2501.23
YGL168W::chr7_2:up	2052.86	2498.67	2336.32
YGL169W::chr7_2:up	760.973	956.125	797.096
YGL170C::chr7_2:up	1168.01	777.649	1264.36
YGL171W::chr7_2:up	318.547	280.463	632.18
YGL172W::chr7_2:up	849.458	777.649	467.263
YGL173C::chr7_2:up	460.123	599.172	494.749
YGL174W::chr7_2:up	707.882	471.688	439.777
YGL175C::chr7_2:up	318.547	152.98	439.777
YGL176C::chr7_2:up	725.579	548.179	659.666
YGL177W::chr7_2:up	495.517	522.682	549.722
YGL179C::chr7_2:up	672.488	739.404	769.61
YGL180W::chr7_2:up	884.852	739.404	989.499
YGL181W::chr7_2:up	743.276	1313.08	1154.42
YGL194C::chr7_3:up	672.488	905.132	522.236
YGL195W::chr7_3:up	35.3941	815.894	494.749
YGL197W::chr7_3:up	566.305	280.463	302.347
YGL199C::chr7_3/chr00_12:up	141.576	267.715	329.833
YGL201C::chr7_3:up	300.85	293.212	247.375
YGL202W::chr7_3:up	212.365	369.702	247.375
YGL205W::chr7_3:up	88.4852	140.232	164.916
YGL206C::chr7_3:up	442.426	382.45	412.291
YGL207W::chr7_3:up	353.941	242.218	247.375
YGL208W::chr7_3:up	159.273	229.47	137.43
YGL209W::chr7_3:up	283.153	152.98	357.319
YGL210W::chr7_3:up	300.85	369.702	769.61
YGL211W::chr7_3:up	194.668	229.47	219.889
YGL212W::chr7_3:up	70.7882	216.722	27.4861
YGL213C::chr7_3:up	530.911	573.675	687.152
YGL214W::chr7_3/chr00_12:up	141.576	216.722	109.944
YGL215W::chr7_3:up	389.335	267.715	247.375
YGL216W::chr7_3:up	265.456	280.463	164.916
YGL217C::chr7_3/chr00_12:up	176.97	382.45	192.403
YGL218W::chr7_3/chr00_12:up	353.941	777.649	604.694
YGL219C::chr00_14:up	300.85	586.424	549.722
YGL220W::chr7_3:up	212.365	242.218	164.916
YGL221C::chr7_3:up	194.668	203.973	109.944
YGL222C::chr7_3:up	230.062	407.947	577.208
YGL223C::chr7_3:up	265.456	216.722	274.861
YGL224C::chr7_3:up	371.638	280.463	577.208
YGL226C-A::chr7_3:up	53.0911	203.973	164.916
YGL227W::chr7_3:up	212.365	369.702	439.777
YGL230C::chr7_3:up	407.032	879.635	742.124
YGL231C::chr7_3:up	159.273	293.212	192.403
YGL233W::chr7_3:up	106.182	356.953	219.889
YGL234W::chr7_3:up	230.062	280.463	329.833
YGL235W::chr7_3/chr00_12:up	141.576	318.708	384.805
YGL236C::chr7_3:up	318.547	305.96	357.319
YGL237C::chr7_3:up	300.85	242.218	274.861
YGL238W::chr7_3:up	106.182	165.728	54.9722
YGL239C::chr7_3/chr00_12:up	389.335	356.953	549.722
YGL240W::chr7_3:up	141.576	216.722	137.43
YGL241W::chr7_3:up	230.062	254.967	192.403
YGL242C::chr7_3:up	460.123	713.907	824.582
YGL246C::chr7_3:up	88.4852	178.477	164.916
YGL247W::chr7_3:up	584.003	509.933	357.319
YGL248W::chr7_3:up	230.062	127.483	384.805
YGL249W::chr7_3:up	88.4852	165.728	329.833
YGL251C::chr7_3:up	389.335	280.463	274.861
YGL253W::chr7_3:up	672.488	356.953	329.833
YGL254W::chr7_3:up	566.305	624.669	632.18
YGL256W::chr7_3:up	336.244	331.457	357.319
YGL257C::chr7_3:up	265.456	229.47	274.861
YGL259W::chr7_3:up	477.82	471.688	577.208
YGL260W::chr7_3:up	212.365	203.973	137.43
YGL261C::chr7_3:up	194.668	140.232	109.944
YGR002C::chr7_3:up	300.85	216.722	274.861
YGR003W::chr7_3:up	194.668	203.973	247.375
YGR004W::chr7_3:up	176.97	140.232	329.833
YGR006W::chr7_3:up	318.547	178.477	137.43
YGR007W::chr7_3:up	300.85	548.179	549.722
YGR008C::chr7_3:up	389.335	471.688	384.805
YGR009C::chr7_3:up	318.547	305.96	219.889
YGR011W::chr7_3/chr00_12:up	212.365	471.688	329.833
YGR012W::chr7_3:up	566.305	471.688	522.236
YGR014W::chr7_3:up	194.668	242.218	192.403
YGR015C::chr7_3:up	725.579	624.669	577.208
YGR016W::chr7_3:up	159.273	229.47	164.916
YGR017W::chr7_3:up	176.97	178.477	192.403
YGR018C::chr7_3/chr00_12:up	353.941	267.715	274.861
YGR019W::chr7_3:up	353.941	267.715	247.375
YGR020C::chr7_3:up	849.458	675.662	934.527
YGR021W::chr7_3:up	884.852	828.642	962.013
YGR022C::chr7_3/chr00_12:up	725.579	790.397	934.527
YGR023W::chr7_3:up	584.003	420.695	852.069
YGR024C::chr00_14:up	336.244	548.179	384.805
YGR025W::chr7_3/chr00_12:up	1079.52	1109.11	989.499
YGR026W::chr7_3:up	194.668	420.695	302.347
YGR027C::chr7_4:up	601.7	446.192	439.777
YGR028W::chr00_14:up	548.608	484.437	274.861
YGR030C::chr7_4:up	265.456	152.98	274.861
YGR031W::chr7_4:up	619.397	815.894	439.777
YGR032W::chr00_14:up	265.456	369.702	577.208
YGR033C::chr7_4:up	654.791	395.198	769.61
YGR034W::chr7_4:up	371.638	344.205	329.833
YGR035C::chr7_4:up	584.003	560.927	522.236
YGR036C::chr7_4:up	353.941	407.947	439.777
YGR038W::chr00_14:up	371.638	484.437	577.208
YGR039W::chr7_4:up	212.365	152.98	219.889
YGR040W::chr00_14:up	672.488	522.682	1099.44
YGR042W::chr7_4:up	407.032	446.192	439.777
YGR043C::chr7_4:up	725.579	548.179	302.347
YGR044C::chr7_4:up	300.85	484.437	302.347
YGR045C::chr7_4:up	477.82	446.192	577.208
YGR046W::chr00_14:up	353.941	229.47	247.375
YGR047C::chr7_4:up	336.244	242.218	192.403
YGR048W::chr00_14:up	88.4852	203.973	247.375
YGR049W::chr7_4:up	1221.1	841.39	1484.25
YGR050C::chr00_14:up	460.123	280.463	82.4582
YGR051C::chr7_4:up	1132.61	1313.08	1869.05
YGR052W::chr7_4:up	1221.1	1274.83	1704.14
YGR053C::chr00_14:up	1698.92	1593.54	1484.25
YGR055W::chr7_4:up	654.791	688.41	494.749
YGR056W::chr7_4:up	88.4852	165.728	109.944
YGR057C::chr7_4:up	654.791	369.702	274.861
YGR058W::chr7_4:up	584.003	471.688	549.722
YGR060W::chr7_4:up	530.911	611.92	384.805
YGR061C::chr7_4:up	371.638	369.702	219.889
YGR063C::chr00_14:up	407.032	471.688	494.749
YGR064W::chr7_4:up	460.123	548.179	219.889
YGR065C::chr7_4:up	424.729	548.179	494.749
YGR066C::chr7_4:up	760.973	522.682	1429.28
YGR067C::chr7_4:up	1026.43	841.39	742.124
YGR069W::chr7_4:up	814.064	573.675	604.694
YGR071C::chr7_4:up	831.761	777.649	494.749
YGR073C::chr7_4:up	477.82	446.192	549.722
YGR074W::chr7_4:up	1044.13	1313.08	659.666
YGR075C::chr7_4:up	1415.76	1096.36	1154.42
YGR076C::chr7_4:up	743.276	586.424	274.861
YGR077C::chr7_4:up	1008.73	956.125	687.152
YGR078C::chr7_4:up	902.549	624.669	934.527
YGR079W::chr7_4:up	760.973	662.914	467.263
YGR080W::chr7_4:up	1221.1	905.132	1044.47
YGR082W::chr00_14:up	70.7882	165.728	137.43
YGR083C::chr7_4:up	477.82	318.708	357.319
YGR084C::chr7_4:up	654.791	777.649	577.208
YGR086C::chr00_14:up	513.214	803.145	329.833
YGR087C::chr7_4:up	814.064	905.132	522.236
YGR088W::chr7_4:up	796.367	637.417	659.666
YGR089W::chr00_14:up	247.759	203.973	357.319
YGR090W::chr7_4:up	495.517	356.953	329.833
YGR092W::chr00_14:up	300.85	254.967	439.777
YGR095C::chr7_4:up	176.97	89.2384	329.833
YGR097W::chr7_4:up	530.911	611.92	687.152
YGR098C::chr7_4:up	407.032	356.953	549.722
YGR099W::chr7_4:up	353.941	446.192	412.291
YGR100W::chr7_4:up	407.032	280.463	219.889
YGR101W::chr7_4:up	548.608	764.9	522.236
YGR102C::chr7_4:up	707.882	854.139	577.208
YGR103W::chr7_4:up	353.941	471.688	494.749
YGR104C::chr7_4:up	743.276	752.152	714.638
YGR105W::chr7_4:up	920.246	777.649	632.18
YGR107W::chr7_4:up	796.367	841.39	439.777
YGR109C::chr7_4:up	814.064	624.669	329.833
YGR111W::chr7_4:up	1344.98	1198.34	962.013
YGR113W::chr7_4:up	973.338	484.437	907.041
YGR114C::chr7_4:up	159.273	178.477	109.944
YGR115C::chr7_4:up	601.7	764.9	549.722
YGR116W::chr00_14:up	371.638	420.695	302.347
YGR117C::chr00_14:up	584.003	828.642	742.124
YGR118W::chr7_4:up	212.365	254.967	192.403
YGR119C::chr7_4:up	123.879	216.722	82.4582
YGR120C::chr7_4:up	300.85	305.96	247.375
YGR121C::chr7_4:up	283.153	254.967	274.861
YGR122C-A::chr00_17a:up	247.759	242.218	192.403
YGR122W::chr7_4:up	159.273	293.212	247.375
YGR123C::chr7_5:up	336.244	356.953	439.777
YGR124W::chr7_5:up	796.367	637.417	742.124
YGR125W::chr7_5:up	743.276	943.377	1044.47
YGR127W::chr7_5:up	300.85	229.47	357.319
YGR128C::chr7_5:up	371.638	318.708	412.291
YGR129W::chr7_5:up	548.608	305.96	439.777
YGR131W::chr7_5:up	176.97	165.728	192.403
YGR133W::chr7_5:up	389.335	433.443	164.916
YGR134W::chr00_8:up	548.608	713.907	769.61
YGR135W::chr7_5:up	1221.1	688.41	989.499
YGR136W::chr7_5:up	796.367	828.642	1044.47
YGR139W::chr7_5:up	743.276	701.159	467.263
YGR140W::chr7_5:up	955.64	637.417	907.041
YGR141W::chr7_5:up	283.153	229.47	274.861
YGR143W::chr7_5:up	530.911	395.198	577.208
YGR144W::chr7_5:up	247.759	305.96	302.347
YGR145W::chr00_15:up	371.638	471.688	357.319
YGR146C::chr7_5:up	371.638	535.43	604.694
YGR147C::chr7_5:up	513.214	637.417	467.263
YGR148C::chr7_5:up	814.064	752.152	439.777
YGR151C::chr7_5:up	707.882	790.397	632.18
YGR154C::chr7_5:up	937.943	560.927	494.749
YGR155W::chr7_5:up	867.155	726.655	467.263
YGR156W::chr7_5:up	920.246	841.39	604.694
YGR157W::chr7_5:up	35.3941	191.225	27.4861
YGR158C::chr7_5:up	407.032	165.728	219.889
YGR159C::chr7_5:up	265.456	318.708	219.889
YGR160W::chr7_5:up	814.064	713.907	522.236
YGR161C::chr7_5:up	548.608	777.649	467.263
YGR162W::chr00_17a:up	1097.22	1223.84	1429.28
YGR163W::chr7_5:up	265.456	216.722	219.889
YGR164W::chr7_5:up	407.032	548.179	907.041
YGR165W::chr7_5:up	796.367	1185.6	1236.87
YGR167W::chr7_5:up	424.729	280.463	494.749
YGR168C::chr7_5:up	601.7	522.682	302.347
YGR169C::chr7_5:up	371.638	573.675	329.833
YGR170W::chr7_5:up	707.882	650.165	604.694
YGR171C::chr7_5:up	796.367	611.92	824.582
YGR172C::chr7_5:up	796.367	994.37	1016.99
YGR173W::chr7_5:up	353.941	318.708	302.347
YGR174C::chr7_5:up	353.941	522.682	522.236
YGR175C::chr7_5:up	389.335	407.947	549.722
YGR176W::chr7_5:up	318.547	356.953	384.805
YGR177C::chr7_5:up	495.517	458.94	632.18
YGR178C::chr7_5:up	265.456	650.165	934.527
YGR179C::chr7_5:up	619.397	599.172	797.096
YGR180C::chr7_5:up	584.003	624.669	494.749
YGR181W::chr7_5:up	920.246	356.953	852.069
YGR182C::chr7_5:up	937.943	943.377	824.582
YGR183C::chr7_5:up	1274.19	905.132	962.013
YGR184C::chr7_5:up	566.305	382.45	467.263
YGR185C::chr7_5:up	690.185	650.165	439.777
YGR186W::chr7_5:up	1061.82	726.655	797.096
YGR187C::chr7_5:up	283.153	216.722	219.889
YGR188C::chr00_10:up	495.517	369.702	467.263
YGR189C::chr7_5:up	920.246	624.669	1044.47
YGR190C::chr7_5:up	601.7	752.152	687.152
YGR191W::chr7_5:up	230.062	254.967	219.889
YGR192C::chr7_5:up	778.67	1045.36	852.069
YGR193C::chr7_5:up	106.182	140.232	219.889
YGR194C::chr7_5:up	371.638	369.702	274.861
YGR195W::chr7_5:up	796.367	637.417	494.749
YGR196C::chr7_5:up	601.7	713.907	632.18
YGR197C::chr7_5:up	1008.73	866.887	1044.47
YGR199W::chr7_5:up	353.941	509.933	577.208
YGR200C::chr7_5:up	760.973	662.914	769.61
YGR202C::chr7_5:up	796.367	854.139	1539.22
YGR203W::chr7_5:up	283.153	344.205	439.777
YGR204W::chr00_10:up	389.335	267.715	329.833
YGR205W::chr7_5:up	513.214	254.967	384.805
YGR206W::chr7_5:up	1734.31	1287.58	1346.82
YGR207C::chr7_5:up	1132.61	1109.11	1126.93
YGR208W::chr7_5:up	849.458	675.662	714.638
YGR209C::chr7_5:up	247.759	127.483	192.403
YGR210C::chr00_8:up	495.517	535.43	247.375
YGR211W::chr7_5:up	283.153	356.953	412.291
YGR212W::chr7_5:up	743.276	828.642	659.666
YGR213C::chr7_5:up	955.64	662.914	1126.93
YGR214W::chr7_5:up	300.85	382.45	302.347
YGR215W::chr7_5:up	513.214	752.152	714.638
YGR216C::chr7_5:up	1362.67	854.139	714.638
YGR219W::chr00_2:up	194.668	127.483	302.347
YGR220C::chr00_2:up	283.153	191.225	412.291
YGR221C::chr00_2:up	513.214	458.94	412.291
YGR222W::chr00_2:up	619.397	484.437	687.152
YGR223C::chr00_2:up	141.576	331.457	109.944
YGR224W::chr00_2:up	513.214	688.41	384.805
YGR225W::chr00_2:up	407.032	344.205	192.403
YGR226C::chr00_2:up	247.759	165.728	219.889
YGR227W::chr00_2:up	353.941	369.702	274.861
YGR228W::chr00_2:up	743.276	841.39	852.069
YGR229C::chr00_2:up	760.973	662.914	632.18
YGR232W::chr00_2:up	283.153	140.232	164.916
YGR234W::chr00_2:up	778.67	688.41	467.263
YGR235C::chr00_2:up	176.97	216.722	54.9722
YGR236C::chr00_2:up	353.941	101.987	687.152
YGR238C::chr00_14:up	814.064	1019.87	879.555
YGR240C::chr00_2:up	176.97	178.477	164.916
YGR241C::chr00_2:up	867.155	790.397	1126.93
YGR242W::chr00_2:up	1026.43	1096.36	962.013
YGR243W::chr00_2:up	584.003	713.907	302.347
YGR245C::chr00_2:up	548.608	369.702	494.749
YGR246C::chr00_2:up	141.576	280.463	247.375
YGR247W::chr00_2:up	318.547	267.715	384.805
YGR248W::chr00_14:up	831.761	930.629	1099.44
YGR249W::chr00_2:up	637.094	446.192	439.777
YGR250C::chr00_14:up	849.458	917.88	1071.96
YGR251W::chr00_2:up	743.276	522.682	989.499
YGR252W::chr00_17a:up	477.82	318.708	329.833
YGR253C::chr00_3:up	318.547	535.43	329.833
YGR254W::chr00_17a:up	796.367	981.622	384.805
YGR255C::chr00_17a:up	601.7	446.192	274.861
YGR256W::chr00_3:up	389.335	662.914	659.666
YGR258C::chr00_17a:up	601.7	395.198	384.805
YGR259C::chr00_3:up	672.488	713.907	1181.9
YGR260W::chr00_3:up	424.729	446.192	219.889
YGR261C::chr00_3:up	1734.31	1236.59	1511.73
YGR263C::chr00_3:up	690.185	497.185	604.694
YGR264C::chr00_3:up	1114.91	943.377	1099.44
YGR266W::chr00_3:up	513.214	509.933	604.694
YGR267C::chr00_3:up	212.365	254.967	137.43
YGR269W::chr00_3:up	1362.67	522.682	1044.47
YGR270W::chr00_3:up	566.305	828.642	659.666
YGR271W::chr00_17a:up	442.426	637.417	577.208
YGR273C::chr00_17a:up	371.638	407.947	439.777
YGR276C::chr00_17a:up	106.182	229.47	247.375
YGR277C::chr00_3:up	247.759	280.463	0
YGR278W::chr00_3:up	265.456	280.463	164.916
YGR279C::chr00_3:up	389.335	586.424	384.805
YGR280C::chr00_3:up	1203.4	1083.61	687.152
YGR281W::chr00_3:up	672.488	637.417	769.61
YGR282C::chr00_3:up	495.517	369.702	329.833
YGR283C::chr00_3:up	371.638	522.682	219.889
YGR284C::chr00_3:up	283.153	739.404	494.749
YGR285C::chr00_3:up	230.062	242.218	54.9722
YGR286C::chr00_3:up	619.397	866.887	494.749
YGR287C::chr00_3:up	353.941	369.702	247.375
YGR288W::chr00_3:up	230.062	471.688	357.319
YGR291C::chr00_17a:up	176.97	267.715	137.43
YGR292W::chr00_17a:up	300.85	267.715	247.375
YGR295C::chr00_17b:up	389.335	356.953	412.291
YHL002W::chr00_10:up	88.4852	178.477	192.403
YHL003C::chr8_1:up	1238.79	1058.11	1181.9
YHL007C::chr8_1:up	442.426	535.43	549.722
YHL009C::chr8_1:up	601.7	535.43	577.208
YHL010C::chr8_1:up	548.608	407.947	439.777
YHL012W::chr8_1:up	690.185	892.384	879.555
YHL013C::chr8_1:up	831.761	815.894	934.527
YHL014C::chr8_1:up	407.032	854.139	494.749
YHL015W::chr8_1:up	1309.58	1147.35	907.041
YHL017W::chr8_1:up	831.761	866.887	769.61
YHL019C::chr8_1:up	884.852	1172.85	1126.93
YHL020C::chr8_1:up	353.941	318.708	604.694
YHL021C::chr8_1:up	407.032	662.914	384.805
YHL022C::chr8_1:up	123.879	229.47	137.43
YHL023C::chr8_1:up	212.365	114.735	137.43
YHL024W::chr00_8:up	247.759	254.967	302.347
YHL026C::chr8_1:up	336.244	305.96	82.4582
YHL027W::chr8_1:up	601.7	637.417	714.638
YHL030W::chr8_1:up	601.7	713.907	852.069
YHL031C::chr8_1:up	353.941	369.702	384.805
YHL032C::chr8_1:up	247.759	293.212	384.805
YHL033C::chr8_1:up	584.003	828.642	797.096
YHL034C::chr8_1:up	141.576	140.232	219.889
YHL035C::chr8_1:up	637.094	446.192	412.291
YHL036W::chr8_1:up	389.335	420.695	219.889
YHL038C::chr8_1:up	460.123	624.669	577.208
YHL040C::chr8_1:up	548.608	458.94	329.833
YHL041W::chr8_1:up	407.032	637.417	329.833
YHL042W::chr8_1:up	1486.55	1070.86	797.096
YHL043W::chr8_1:up	1132.61	1121.85	1319.33
YHL044W::chr8_1:up	212.365	229.47	192.403
YHL045W::chr8_1:up	1274.19	879.635	1071.96
YHL046C::chr8_1:up	654.791	841.39	934.527
YHL047C::chr8_1:up	1132.61	1172.85	1126.93
YHR001W-A::chr8_1:up	548.608	471.688	164.916
YHR003C::chr00_10:up	991.035	713.907	824.582
YHR004C::chr00_10:up	1044.13	1160.1	1099.44
YHR005C::chr00_10:up	1026.43	905.132	549.722
YHR006W::chr00_10:up	1398.07	956.125	659.666
YHR007C::chr00_10:up	654.791	191.225	494.749
YHR008C::chr00_10:up	230.062	152.98	357.319
YHR009C::chr00_10:up	265.456	293.212	192.403
YHR010W::chr8_1:up	194.668	242.218	82.4582
YHR011W::chr8_1:up	53.0911	203.973	109.944
YHR012W::chr8_1:up	141.576	216.722	164.916
YHR013C::chr8_1:up	212.365	140.232	137.43
YHR014W::chr8_1:up	265.456	293.212	219.889
YHR015W::chr8_1:up	495.517	344.205	632.18
YHR016C::chr00_8:up	318.547	344.205	384.805
YHR017W::chr00_8:up	654.791	752.152	962.013
YHR018C::chr8_1:up	1061.82	1121.85	1016.99
YHR021C::chr8_1:up	778.67	892.384	439.777
YHR022C::chr8_1:up	973.338	38.245	852.069
YHR023W::chr00_10:up	513.214	407.947	687.152
YHR024C::chr8_1:up	300.85	152.98	274.861
YHR025W::chr00_10:up	106.182	267.715	137.43
YHR026W::chr00_10:up	106.182	165.728	109.944
YHR028C::chr8_1:up	123.879	191.225	192.403
YHR029C::chr8_1:up	212.365	216.722	247.375
YHR030C::chr8_1:up	88.4852	191.225	192.403
YHR031C::chr8_1:up	1309.58	586.424	824.582
YHR032W::chr00_8:up	477.82	420.695	522.236
YHR033W::chr8_1:up	1008.73	650.165	824.582
YHR034C::chr8_1:up	336.244	484.437	632.18
YHR035W::chr8_1:up	407.032	688.41	659.666
YHR036W::chr8_1:up	300.85	395.198	604.694
YHR037W::chr8_1:up	424.729	331.457	577.208
YHR038W::chr8_1:up	159.273	305.96	82.4582
YHR039C-B::chr00_3:up	477.82	254.967	219.889
YHR039C::chr8_1:up	212.365	446.192	219.889
YHR041C::chr00_10:up	318.547	267.715	329.833
YHR042W::chr8_1:up	283.153	254.967	109.944
YHR043C::chr8_1:up	194.668	191.225	164.916
YHR044C::chr8_1:up	672.488	675.662	742.124
YHR045W::chr00_8:up	495.517	752.152	632.18
YHR046C::chr8_2:up	1398.07	1606.29	1016.99
YHR047C::chr8_2:up	1433.46	1134.6	1154.42
YHR048W::chr8_2:up	1114.91	1019.87	934.527
YHR049C-A::chr8_2:up	690.185	713.907	1346.82
YHR049W::chr8_2:up	2105.95	1912.25	1456.76
YHR050W::chr8_2:up	1238.79	1172.85	824.582
YHR051W::chr8_2:up	460.123	433.443	522.236
YHR057C::chr8_2:up	814.064	522.682	549.722
YHR058C::chr00_10:up	353.941	331.457	907.041
YHR060W::chr8_2:up	283.153	229.47	467.263
YHR061C::chr8_2:up	690.185	713.907	852.069
YHR065C::chr8_2:up	654.791	509.933	302.347
YHR066W::chr8_2:up	672.488	458.94	742.124
YHR067W::chr00_10:up	601.7	433.443	302.347
YHR068W::chr8_2:up	1079.52	1223.84	1291.85
YHR070W::chr8_2:up	849.458	637.417	412.291
YHR073W::chr8_2:up	194.668	509.933	384.805
YHR074W::chr8_2:up	106.182	178.477	82.4582
YHR075C::chr8_2:up	283.153	395.198	412.291
YHR076W::chr8_2:up	424.729	497.185	907.041
YHR077C::chr8_2:up	902.549	637.417	549.722
YHR078W::chr8_2:up	690.185	828.642	742.124
YHR079C-B::chr00_3:up	937.943	790.397	467.263
YHR079C::chr8_2:up	460.123	522.682	604.694
YHR080C::chr8_2:up	159.273	369.702	247.375
YHR081W::chr8_2:up	371.638	293.212	384.805
YHR083W::chr8_2:up	760.973	726.655	742.124
YHR084W::chr8_2:up	477.82	637.417	769.61
YHR086W::chr8_2:up	884.852	1325.83	852.069
YHR087W::chr8_2:up	672.488	701.159	962.013
YHR088W::chr8_2:up	212.365	178.477	274.861
YHR091C::chr8_2:up	353.941	344.205	412.291
YHR092C::chr8_2:up	1097.22	752.152	1044.47
YHR093W::chr8_2:up	1079.52	968.874	879.555
YHR094C::chr8_2:up	442.426	662.914	329.833
YHR095W::chr8_2:up	513.214	458.94	549.722
YHR096C::chr8_2:up	743.276	675.662	494.749
YHR097C::chr8_2:up	778.67	841.39	494.749
YHR100C::chr8_2:up	336.244	318.708	384.805
YHR101C::chr8_2:up	389.335	624.669	797.096
YHR103W::chr8_2:up	495.517	739.404	494.749
YHR104W::chr8_2:up	601.7	624.669	797.096
YHR106W::chr8_2:up	690.185	509.933	687.152
YHR107C::chr8_2:up	336.244	369.702	687.152
YHR109W::chr8_2:up	619.397	560.927	604.694
YHR110W::chr8_2:up	1132.61	752.152	1346.82
YHR111W::chr8_2:up	566.305	497.185	659.666
YHR112C::chr8_2:up	672.488	650.165	439.777
YHR113W::chr8_2:up	230.062	331.457	274.861
YHR114W::chr8_2:up	601.7	484.437	632.18
YHR116W::chr8_2:up	141.576	280.463	219.889
YHR117W::chr8_2:up	1185.7	841.39	604.694
YHR118C::chr8_2:up	601.7	637.417	879.555
YHR120W::chr8_2:up	991.035	854.139	742.124
YHR121W::chr8_2:up	584.003	382.45	549.722
YHR122W::chr8_2:up	407.032	382.45	494.749
YHR124W::chr8_2:up	265.456	242.218	137.43
[truncated: 7,016 more rows]
