# Supplementary material for: Genes Required for Survival in Microgravity Revealed by Genome-Wide Yeast Deletion Collections Cultured during Spaceflight
Source: Biomed Res Int. 2015 Jan 13;2015:976458. doi: 10.1155/2015/976458 (PMC4309212; doi:10.1155/2015/976458)
Supplement: Supplementary file 1 — Supplementary tables 1 and 2 provide the Illumina sequencing counts for each barcode/strain of each sample following mean normalization for the homozygous strains (Supplementary Table S1) and the heterozygous deletion strains (Supplementary Table S2). Supplementary tables 3 and 4 list those strains in the homozygous deletion collection (Supplementary Table S3) and the heterozygous deletion collection (Supplementary Table S4) that were excluded from the analysis for technical reasons. Supplementary tables 5 and 6 contain the results from the analysis of the homozygous deletion collection, comparing ground experiments to flight experiments in YPD media (Supplementary Table S5) and in YPD media + 0.5M NaCl (Supplementary Table S6). Supplementary table S7 contains the concordance in GO enrichments of the experiments presented in this study to a compendium of published data (reference 13). Supplementary tables 8 and 9 contain the results from the analysis of the heterozygous deletion collection, comparing ground experiments to flight experiments in YPD media (Supplementary Table S8) and in YPD media + 0.5M NaCl (Supplementary Table S9). [file 976458.f1.zip › TableS3_excludedStrains-hom.xlsx]

## Sheet: README
Table S3. Homozygous deletion strains omitted from analyses (see Methods).
all sheets
Column	Description
Strain	a strain in the pool
ORF	the ORF deleted from the strain
Gene	the gene name associated with the deleted ORF

## Sheet: ground
Strain	ORF	Gene
YNR033W::chr00_18	YNR033W	ABZ1
YLR144C::chr12_3	YLR144C	ACF2
YDR448W::chr4_8	YDR448W	ADA2
YKL206C::chr11_3	YKL206C	ADD66
YNL220W::chr00_18	YNL220W	ADE12
YGL234W::chr7_3	YGL234W	ADE5,7
YDR408C::chr4_7	YDR408C	ADE8
YOL086C::chr00_6	YOL086C	ADH1
YDR226W::chr4_5	YDR226W	ADK1
YLR227C::chr12_3	YLR227C	ADY4
YIL044C::chr9_1	YIL044C	AGE2
YLR109W::chr12_2	YLR109W	AHP1
YKL037W::chr11_1	YKL037W	AIM26
YBR108W::chr2_3	YBR108W	AIM3
YHR199C::chr8_3	YHR199C	AIM46
YMR092C::chr00_6	YMR092C	AIP1
YDR264C::chr4_6	YDR264C	AKR1
YMR169C::chr00_4	YMR169C	ALD3
YPL061W::chr16_3	YPL061W	ALD6
YNL148C::chr14_2	YNL148C	ALF1
YKR021W::chr11_3	YKR021W	ALY1
YJR047C::chr00_13	YJR047C	ANB1
YEL036C::chr5_2	YEL036C	ANP1
YLR102C::chr12_2	YLR102C	APC9
YPL195W::chr16_1	YPL195W	APL5
YIL040W::chr9_1	YIL040W	APQ12
YBR149W::chr2_3	YBR149W	ARA1
YDR173C::chr4_5	YDR173C	ARG82
YDR127W::chr4_4	YDR127W	ARO1
YPR060C::chr16_4	YPR060C	ARO7
YGL202W::chr7_3	YGL202W	ARO8
YHR129C::chr8_2	YHR129C	ARP1
YNL059C::chr00_18	YNL059C	ARP5
YLR242C::chr12_4	YLR242C	ARV1
YBR128C::chr2_3	YBR128C	ATG14
YLR393W::chr12_5	YLR393W	ATP10
YNL315C::chr00_17b	YNL315C	ATP11
YNL315C::chr00_18	YNL315C	ATP11
YPL271W::chr16_1	YPL271W	ATP15
YDR377W::chr4_7	YDR377W	ATP17
YDR350C::chr4_7	YDR350C	ATP22
YMR098C::chr00_9	YMR098C	ATP25
YDR298C::chr4_6	YDR298C	ATP5
YLR114C::chr12_2	YLR114C	AVL9
YMR068W::chr00_6	YMR068W	AVO2
YJL095W::chr10_2	YJL095W	BCK1
YDR375C::chr4_7	YDR375C	BCS1
YIL033C::chr00_17b	YIL033C	BCY1
YLR399C::chr12_5	YLR399C	BDF1
YBR200W::chr2_4	YBR200W	BEM1
YER155C::chr00_5	YER155C	BEM2
YER177W::chr00_5	YER177W	BMH1
YNL271C::chr14_1	YNL271C	BNI1
YGR230W::chr00_2	YGR230W	BNS1
YDR275W::chr4_6	YDR275W	BSC2
YOL137W::chr00_6	YOL137W	BSC6
YPL069C::chr16_3	YPL069C	BTS1
YDR252W::chr4_6	YDR252W	BTT1
YGR188C::chr00_10	YGR188C	BUB1
YOR026W::chr15_1	YOR026W	BUB3
YJL188C::chr10_1	YJL188C	BUD19
YCR047C::chr00_16a	YCR047C	BUD23
YER014C-A::chr5_3	YER014C-A	BUD25
YFL023W::chr6_1	YFL023W	BUD27
YLR062C::chr12_2	YLR062C	BUD28
YDL151C::chr4_2	YDL151C	BUD30
YCR063W::chr00_1	YCR063W	BUD31
YGR262C::chr00_3	YGR262C	BUD32
YLR226W::chr12_3	YLR226W	BUR2
YNL278W::chr14_1	YNL278W	CAF120
YKR036C::chr00_14	YKR036C	CAF4
YPL048W::chr16_3	YPL048W	CAM1
YOR125C::chr15_2	YOR125C	CAT5
YPL215W::chr16_1	YPL215W	CBP3
YDR197W::chr4_5	YDR197W	CBS2
YDR270W::chr4_6	YDR270W	CCC2
YGL206C::chr7_3	YGL206C	CHC1
YBR274W::chr00_1	YBR274W	CHK1
YBR038W::chr2_2	YBR038W	CHS2
YMR198W::chr00_11	YMR198W	CIK1
YPR001W::chr16_3	YPR001W	CIT3
YNL298W::chr14_1	YNL298W	CLA4
YGR167W::chr7_5	YGR167W	CLC1
YNL225C::chr14_2	YNL225C	CNM67
YIL157C::chr9_2	YIL157C	COA1
YLR218C::chr12_3	YLR218C	COA4
YGL223C::chr7_3	YGL223C	COG1
YOL096C::chr00_6	YOL096C	COQ3
YGR255C::chr00_17a	YGR255C	COQ6
YBL045C::chr2_1	YBL045C	COR1
YPL172C::chr16_2	YPL172C	COX10
YER141W::chr00_5	YER141W	COX15
YGR062C::chr7_4	YGR062C	COX18
YDR231C::chr4_5	YDR231C	COX20
YNL052W::chr00_16b	YNL052W	COX5A
YMR256C::chr13_5	YMR256C	COX7
YNL130C::chr00_16b	YNL130C	CPT1
YLR087C::chr12_2	YLR087C	CSF1
YMR025W::chr13_2	YMR025W	CSI1
YMR048W::chr00_11	YMR048W	CSM3
YMR078C::chr00_6	YMR078C	CTF18
YPR135W::chr16_5	YPR135W	CTF4
YHR191C::chr00_8	YHR191C	CTF8
YKL139W::chr00_14	YKL139W	CTK1
YJL006C::chr00_13	YJL006C	CTK2
YML112W::chr00_9	YML112W	CTK3
YPR124W::chr16_5	YPR124W	CTR1
YJR048W::chr00_13	YJR048W	CYC1
YAL039C::chr1_1	YAL039C	CYC3
YBR112C::chr00_16a	YBR112C	CYC8
YGR155W::chr00_11	YGR155W	CYS4
YIR027C::chr00_3	YIR027C	DAL1
YGR092W::chr00_14	YGR092W	DBF2
YLR128W::chr12_3	YLR128W	DCN1
YER143W::chr00_5	YER143W	DDI1
YKL054C::chr11_1	YKL054C	DEF1
YFL001W::chr00_17a	YFL001W	DEG1
YBR201W::chr2_4	YBR201W	DER1
YIL049W::chr9_1	YIL049W	DFG10
YOR311C::chr15_4	YOR311C	DGK1
YDL160C::chr4_2	YDL160C	DHH1
YOR080W::chr15_1	YOR080W	DIA2
YHR011W::chr8_1	YHR011W	DIA4
YPL049C::chr16_3	YPL049C	DIG1
YDR263C::chr4_6	YDR263C	DIN7
YJL065C::chr10_2	YJL065C	DLS1
YMR126C::chr00_9	YMR126C	DLT1
YGL240W::chr7_3	YGL240W	DOC1
YDR273W::chr4_6	YDR273W	DON1
YKL191W::chr11_3	YKL191W	DPH2
YLR172C::chr12_3	YLR172C	DPH5
YDR284C::chr4_6	YDR284C	DPP1
YGL196W::chr7_3	YGL196W	DSD1
YHR143W::chr8_3	YHR143W	DSE2
YKR054C::chr11_3	YKR054C	DYN1
YDR359C::chr4_7	YDR359C	EAF1
YKL204W::chr00_14	YKL204W	EAP1
YLR436C::chr00_4	YLR436C	ECM30
YER176W::chr00_5	YER176W	ECM32
YLR443W::chr00_4	YLR443W	ECM7
YGR272C::chr00_17a	YGR271C-A	EFG1
YPL046C::chr16_3	YPL046C	ELC1
YKL160W::chr11_2	YKL160W	ELF1
YOL071W::chr15_5	YOL071W	EMI5
YGL200C::chr7_3	YGL200C	EMP24
YLR080W::chr12_2	YLR080W	EMP46
YLR083C::chr12_2	YLR083C	EMP70
YLR065C::chr12_2	YLR065C	ENV10
YMR202W::chr13_4	YMR202W	ERG2
YNL280C::chr14_1	YNL280C	ERG24
YER044C::chr5_3	YER044C	ERG28
YGL012W::chr7_1	YGL012W	ERG4
YOR016C::chr15_1	YOR016C	ERP4
YFR019W::chr00_15	YFR019W	FAB1
YNL127W::chr14_3	YNL127W	FAR11
YKR016W::chr11_3	YKR016W	FCJ1
YOR383C::chr15_4	YOR383C	FIT3
YAR050W::chr00_12	YAR050W	FLO1
YIL134W::chr9_2	YIL134W	FLX1
YHR176W::chr8_3	YHR176W	FMO1
YBL042C::chr2_1	YBL042C	FUI1
YAL035W::chr1_1	YAL035W	FUN12
YNL133C::chr14_3	YNL133C	FYV6
YLR068W::chr12_2	YLR068W	FYV7
YBR179C::chr2_4	YBR179C	FZO1
YGL195W::chr7_3	YGL195W	GCN1
YDR283C::chr4_6	YDR283C	GCN2
YGR252W::chr00_17a	YGR252W	GCN5
YBR187W::chr2_4	YBR187W	GDT1
YGL020C::chr7_1	YGL020C	GET1
YDR358W::chr4_7	YDR358W	GGA1
YDR309C::chr4_6	YDR309C	GIC2
YER054C::chr5_3	YER054C	GIP2
YER107C::chr00_5	YER107C	GLE2
YDR272W::chr4_6	YDR272W	GLO2
YPL091W::chr16_3	YPL091W	GLR1
YHR183W::chr8_3	YHR183W	GND1
YJL184W::chr00_14	YJL184W	GON7
YJR090C::chr00_12	YJR090C	GRR1
YPL059W::chr16_3	YPL059W	GRX5
YML121W::chr00_9	YML121W	GTR1
YPR005C::chr16_3	YPR005C	HAL1
YGL237C::chr7_3	YGL237C	HAP2
YBL021C::chr2_1	YBL021C	HAP3
YOR358W::chr15_4	YOR358W	HAP5
YKR084C::chr00_3	YKR084C	HBS1
YDR295C::chr4_6	YDR295C	HDA2
YPR179C::chr16_5	YPR179C	HDA3
YBL032W::chr2_1	YBL032W	HEK2
YER014W::chr5_2	YER014W	HEM14
YPL254W::chr16_1	YPL254W	HFI1
YBL008W::chr2_1	YBL008W	HIR1
YJR055W::chr00_17b	YJR055W	HIT1
YJR055W::chr00_13	YJR055W	HIT1
YMR032W::chr13_2	YMR032W	HOF1
YDR158W::chr4_5	YDR158W	HOM2
YER052C::chr5_3	YER052C	HOM3
YJR139C::chr00_12	YJR139C	HOM6
YBR215W::chr2_4	YBR215W	HPC2
YDR138W::chr4_4	YDR138W	HPR1
YKL101W::chr11_2	YKL101W	HSL1
YBR133C::chr2_3	YBR133C	HSL7
YDR258C::chr4_6	YDR258C	HSP78
YBL003C::chr2_1	YBL003C	HTA2
YOL012C::chr15_5	YOL012C	HTZ1
YER039C::chr5_3	YER039C	HVG1
YNR072W::chr00_6	YNR072W	HXT17
YPL250C::chr16_1	YPL250C	ICY2
YLR174W::chr12_3	YLR174W	IDP2
YNL009W::chr14_4	YNL009W	IDP3
YNL215W::chr14_2	YNL215W	IES2
YEL044W::chr5_2	YEL044W	IES6
YBR159W::chr2_3	YBR159W	IFA38
YER086W::chr5_3	YER086W	ILV1
YCR071C::chr00_1	YCR071C	IMG2
YMR150C::chr13_4	YMR150C	IMP1
YIL154C::chr9_2	YIL154C	IMP2'
YMR044W::chr13_2	YMR044W	IOC4
YDR315C::chr4_6	YDR315C	IPK1
YPL017C::chr00_17b	YPL017C	IRC15
YIR036C::chr00_3	YIR036C	IRC24
YDR332W::chr4_6	YDR332W	IRC3
YHR079C::chr8_2	YHR079C	IRE1
YLL027W::chr12_1	YLL027W	ISA1
YPL040C::chr16_3	YPL040C	ISM1
YBR086C::chr2_3	YBR086C	IST2
YOL101C::chr00_6	YOL101C	IZH4
YBR017C::chr2_2	YBR017C	KAP104
YGL241W::chr7_3	YGL241W	KAP114
YGL203C::chr7_3	YGL203C	KEX1
YDR532C::chr4_8	YDR532C	KRE28
YOR123C::chr15_2	YOR123C	LEO1
YPL055C::chr16_3	YPL055C	LGE1
YHR156C::chr8_3	YHR156C	LIN1
YCL034W::chr3_1	YCL034W	LSB5
YGR244C::chr00_2	YGR244C	LSC2
YAL024C::chr00_17a	YAL024C	LTE1
YKL143W::chr11_2	YKL143W	LTV1
YLR244C::chr12_4	YLR244C	MAP1
YOR298C-A::chr00_17b	YOR298C-A	MBF1
YDR318W::chr4_6	YDR318W	MCM21
YAL010C::chr1_1	YAL010C	MDM10
YOL009C::chr15_5	YOL009C	MDM12
YOL076W::chr15_5	YOL076W	MDM20
YGL219C::chr00_14	YGL219C	MDM34
YGL197W::chr7_3	YGL197W	MDS3
YKR007W::chr11_3	YKR007W	MEH1
YPR138C::chr16_5	YPR138C	MEP3
YIL128W::chr9_2	YIL128W	MET18
YNL277W::chr14_1	YNL277W	MET2
YOL064C::chr15_5	YOL064C	MET22
YPL038W::chr16_3	YPL038W	MET31
YER091C::chr00_8	YER091C	MET6
YOR241W::chr15_3	YOR241W	MET7
YPL060W::chr16_3	YPL060W	MFM1
YIR033W::chr00_3	YIR033W	MGA2
YEL007W::chr5_2	YEL007W	MIT1
YPL140C::chr16_2	YPL140C	MKK2
YNL117W::chr14_3	YNL117W	MLS1
YLR320W::chr12_4	YLR320W	MMS22
YDR245W::chr4_6	YDR245W	MNN10
YPL050C::chr16_3	YPL050C	MNN9
YHR162W::chr00_8	YHR162W	MPC2
YMR224C::chr13_4	YMR224C	MRE11
YGL064C::chr7_1	YGL064C	MRH4
YKL003C::chr11_1	YKL003C	MRP17
YBL090W::chr2_1	YBL090W	MRP21
YBL038W::chr2_1	YBL038W	MRPL16
YKR085C::chr00_15	YKR085C	MRPL20
YMR193W::chr13_4	YMR193W	MRPL24
YGR076C::chr7_4	YGR076C	MRPL25
YBR282W::chr00_1	YBR282W	MRPL27
YMR024W::chr13_2	YMR024W	MRPL3
YMR286W::chr13_5	YMR286W	MRPL33
YDR322W::chr4_6	YDR322W	MRPL35
YDR237W::chr4_5	YDR237W	MRPL7
YNR036C::chr14_4	YNR036C	MRPS12
YDR337W::chr4_6	YDR337W	MRPS28
YMR158W::chr00_8	YMR158W	MRPS8
YBR146W::chr2_3	YBR146W	MRPS9
YKL009W::chr11_1	YKL009W	MRT4
YHR120W::chr8_2	YHR120W	MSH1
YIR009W::chr9_2	YIR009W	MSL1
YOL116W::chr00_6	YOL116W	MSN1
YDR335W::chr4_6	YDR335W	MSN5
YDR194C::chr4_5	YDR194C	MSS116
YPR134W::chr16_5	YPR134W	MSS18
YKL194C::chr00_14	YKL194C	MST1
YGL226W::chr7_3	YGL226W	MTC3
YHR151C::chr8_3	YHR151C	MTC6
YEL033W::chr5_2	YEL033W	MTC7
YMR228W::chr13_4	YMR228W	MTF1
YDR277C::chr4_6	YDR277C	MTH1
YPR131C::chr16_5	YPR131C	NAT3
YGL211W::chr7_3	YGL211W	NCS6
YDR176W::chr4_5	YDR176W	NGG1
YGL221C::chr7_3	YGL221C	NIF3
YLR285W::chr12_4	YLR285W	NNT1
YIL038C::chr9_1	YIL038C	NOT3
YPR072W::chr16_4	YPR072W	NOT5
YDR432W::chr4_7	YDR432W	NPL3
YMR091C::chr00_6	YMR091C	NPL6
YKL057C::chr11_1	YKL057C	NUP120
YML103C::chr00_9	YML103C	NUP188
YDL116W::chr4_2	YDL116W	NUP84
YHR195W::chr8_3	YHR195W	NVJ1
YPL052W::chr16_3	YPL052W	OAZ1
YGL038C::chr7_1	YGL038C	OCH1
YKL134C::chr11_2	YKL134C	OCT1
YDR316W::chr4_6	YDR316W	OMS1
YKR035C::chr11_3	YKR035C	OPI8
YLR338W::chr12_5	YLR338W	OPI9
YDL232W::chr4_3	YDL232W	OST4
YGL226C-A::chr7_3	YGL226C-A	OST5
YLR054C::chr12_2	YLR054C	OSW2
YFL044C::chr6_1	YFL044C	OTU1
YOR269W::chr00_17b	YOR269W	PAC1
YBR279W::chr00_1	YBR279W	PAF1
YMR165C::chr13_4	YMR165C	PAH1
YKR097W::chr00_4	YKR097W	PCK1
YGL248W::chr7_3	YGL248W	PDE1
YPR002W::chr16_3	YPR002W	PDH1
YOR153W::chr15_2	YOR153W	PDR5
YOR036W::chr15_1	YOR036W	PEP12
YLR148W::chr12_3	YLR148W	PEP3
YDR323C::chr4_6	YDR323C	PEP7
YDR079W::chr4_4	YDR079W	PET100
YMR257C::chr13_5	YMR257C	PET111
YBL080C::chr2_1	YBL080C	PET112
YER153C::chr00_5	YER153C	PET122
YJR034W::chr00_13	YJR034W	PET191
YLR067C::chr12_2	YLR067C	PET309
YNL003C::chr14_4	YNL003C	PET8
YMR026C::chr13_2	YMR026C	PEX12
YOL044W::chr15_5	YOL044W	PEX15
YHR160C::chr8_3	YHR160C	PEX18
YHR150W::chr8_3	YHR150W	PEX28
YBR168W::chr00_16a	YBR168W	PEX32
YGR240C::chr00_2	YGR240C	PFK1
YMR205C::chr13_4	YMR205C	PFK2
YOL136C::chr00_6	YOL136C	PFK27
YHR185C::chr00_10	YHR185C	PFS1
YPL206C::chr16_1	YPL206C	PGC1
YPL031C::chr16_3	YPL031C	PHO85
YJL198W::chr10_1	YJL198W	PHO90
YDR313C::chr4_6	YDR313C	PIB1
YOR104W::chr15_2	YOR104W	PIN2
YPR154W::chr16_5	YPR154W	PIN3
YOL100W::chr00_6	YOL100W	PKH2
YMR123W::chr00_9	YMR123W	PKR1
YPL268W::chr00_15	YPL268W	PLC1
YDR276C::chr4_6	YDR276C	PMP3
YIL122W::chr9_2	YIL122W	POG1
YLL023C::chr12_1	YLL023C	POM33
YNR052C::chr00_15	YNR052C	POP2
YMR297W::chr13_5	YMR297W	PRC1
YGR006W::chr7_3	YGR006W	PRP18
YKL181W::chr11_2	YKL181W	PRS1
YHL011C::chr00_10	YHL011C	PRS3
YBL064C::chr2_1	YBL064C	PRX1
YBL046W::chr2_1	YBL046W	PSY4
YHR189W::chr8_3	YHR189W	PTH1
YNL016W::chr14_4	YNL016W	PUB1
YGR183C::chr7_5	YGR183C	QCR9
YBR114W::chr2_3	YBR114W	RAD16
YML032C::chr13_2	YML032C	RAD52
YGL058W::chr7_1	YGL058W	RAD6
YGL246C::chr7_3	YGL246C	RAI1
YNL098C::chr14_3	YNL098C	RAS2
YJR033C::chr00_13	YJR033C	RAV1
YJL204C::chr10_1	YJL204C	RCY1
YHR157W::chr8_3	YHR157W	REC104
YLR059C::chr12_2	YLR059C	REX2
YOL080C::chr15_5	YOL080C	REX4
YLR176C::chr12_3	YLR176C	RFX1
YBL033C::chr2_1	YBL033C	RIB1
YOL143C::chr00_10	YOL143C	RIB4
YEL024W::chr5_2	YEL024W	RIP1
YDR257C::chr4_6	YDR257C	RKM4
YPL089C::chr16_3	YPL089C	RLM1
YDL001W::chr4_1	YDL001W	RMD1
YDR255C::chr4_6	YDR255C	RMD5
YGL107C::chr7_2	YGL107C	RMD9
YPL024W::chr16_3	YPL024W	RMI1
YDR279W::chr4_6	YDR279W	RNH202
YLR154C::chr12_3	YLR154C	RNH203
YER070W::chr5_3	YER070W	RNR1
YGR180C::chr7_5	YGR180C	RNR4
YGR070W::chr7_4	YGR070W	ROM1
YPR065W::chr16_4	YPR065W	ROX1
YBL093C::chr2_1	YBL093C	ROX3
YJL140W::chr00_14	YJL140W	RPB4
YGL070C::chr7_1	YGL070C	RPB9
YMR142C::chr00_8	YMR142C	RPL13B
YPL079W::chr16_3	YPL079W	RPL21B
YLR061W::chr12_2	YLR061W	RPL22A
YDL075W::chr4_1	YDL075W	RPL31A
YJL189W::chr00_14	YJL189W	RPL39
YGL076C::chr7_1	YGL076C	RPL7A
YDR382W::chr4_7	YDR382W	RPP2B
YLR048W::chr12_2	YLR048W	RPS0B
YLR441C::chr00_4	YLR441C	RPS1A
YPR132W::chr16_5	YPR132W	RPS23B
YLR333C::chr12_5	YLR333C	RPS25B
YPL090C::chr16_3	YPL090C	RPS6A
YIL153W::chr9_2	YIL153W	RRD1
YER066W::chr00_10	YER066W	RRT13
YPL193W::chr16_1	YPL193W	RSA1
YLR221C::chr12_3	YLR221C	RSA3
YLR357W::chr12_5	YLR357W	RSC2
YMR030W::chr13_2	YMR030W	RSF1
YDR175C::chr4_5	YDR175C	RSM24
YNL254C::chr14_1	YNL254C	RTC4
YPL183W-A::chr00_11	YPL183W-A	RTC6
YGL244W::chr7_3	YGL244W	RTF1
YGL252C::chr7_3	YGL252C	RTG2
YDR289C::chr4_6	YDR289C	RTT103
YLL002W::chr12_1	YLL002W	RTT109
YKL212W::chr11_3	YKL212W	SAC1
YDR129C::chr4_4	YDR129C	SAC6
YDR389W::chr4_7	YDR389W	SAC7
YJL098W::chr10_2	YJL098W	SAP185
YGL229C::chr7_3	YGL229C	SAP4
YDR351W::chr4_7	YDR351W	SBE2
YMR272C::chr13_5	YMR272C	SCS7
YKL148C::chr11_2	YKL148C	SDH1
YLR268W::chr12_4	YLR268W	SEC22
YBR171W::chr2_3	YBR171W	SEC66
YGR208W::chr7_5	YGR208W	SER2
YLR403W::chr12_5	YLR403W	SFP1
YOR073W::chr15_1	YOR073W	SGO1
YGL228W::chr7_3	YGL228W	SHE10
YOR035C::chr15_1	YOR035C	SHE4
YBL058W::chr2_1	YBL058W	SHP1
YOL004W::chr15_5	YOL004W	SIN3
YDR422C::chr4_7	YDR422C	SIP1
YGL208W::chr7_3	YGL208W	SIP2
YJL089W::chr10_2	YJL089W	SIP4
YPR189W::chr16_5	YPR189W	SKI3
YPL026C::chr16_3	YPL026C	SKS1
YNL243W::chr14_2	YNL243W	SLA2
YBR156C::chr2_3	YBR156C	SLI15
YNL047C::chr00_18	YNL047C	SLM2
YDL013W::chr4_1	YDL013W	SLX5
YNL196C::chr14_2	YNL196C	SLZ1
YPL027W::chr00_17b	YPL027W	SMA1
YML066C::chr00_15	YML066C	SMA2
YNR023W::chr14_4	YNR023W	SNF12
YBR289W::chr00_16a	YBR289W	SNF5
YHL025W::chr00_8	YHL025W	SNF6
YPR101W::chr16_4	YPR101W	SNT309
YOR357C::chr15_4	YOR357C	SNX3
YCR073W-A::chr00_1	YCR073W-A	SOL2
YMR066W::chr00_6	YMR066W	SOV1
YJR010C-A::chr00_13	YJR010C-A	SPC1
YAL047C::chr00_12	YAL047C	SPC72
YHR014W::chr8_1	YHR014W	SPO13
YKR031C::chr11_3	YKR031C	SPO14
YHR153C::chr8_3	YHR153C	SPO16
YOR313C::chr15_4	YOR313C	SPS4
YJL127C::chr10_2	YJL127C	SPT10
YOL148C::chr00_18	YOL148C	SPT20
YKL020C::chr11_1	YKL020C	SPT23
YDR392W::chr4_7	YDR392W	SPT3
YBR081C::chr2_3	YBR081C	SPT7
YKR091W::chr00_4	YKR091W	SRL3
YNL138W::chr00_17b	YNL138W	SRV2
YLR369W::chr12_5	YLR369W	SSQ1
YLR452C::chr00_4	YLR452C	SST2
YHR178W::chr8_3	YHR178W	STB5
YLR150W::chr12_3	YLR150W	STM1
YMR125W::chr00_9	YMR125W	STO1
YDL048C::chr4_1	YDL048C	STP4
YDR346C::chr4_7	YDR346C	SVF1
YDR320C::chr4_6	YDR320C	SWA2
YAR044W::chr1_1	YAR042W	SWH1
YLR182W::chr12_3	YLR182W	SWI6
YDR260C::chr4_6	YDR260C	SWM1
YLR251W::chr12_4	YLR251W	SYM1
YJL004C::chr00_13	YJL004C	SYS1
YPL129W::chr16_2	YPL129W	TAF14
YBR150C::chr00_16a	YBR150C	TBS1
YOR086C::chr15_1	YOR086C	TCB1
YBR044C::chr2_2	YBR044C	TCM62
YBR118W::chr2_3	YBR118W	TEF2
YNL128W::chr14_3	YNL128W	TEP1
YGR144W::chr7_5	YGR144W	THI4
YNL139C::chr14_3	YNL139C	THO2
YOL072W::chr15_5	YOL072W	THP1
YHR167W::chr8_3	YHR167W	THP2
YHR025W::chr00_10	YHR025W	THR1
YCR053W::chr00_16a	YCR053W	THR4
YKR059W::chr11_3	YKR059W	TIF1
YPR163C::chr16_5	YPR163C	TIF3
YLR234W::chr12_4	YLR234W	TOP3
YBR162C::chr2_3	YBR162C	TOS1
YKL166C::chr11_2	YKL166C	TPK3
YBR126C::chr2_3	YBR126C	TPS1
YML005W::chr13_2	YML005W	TRM12
YPL030W::chr16_3	YPL030W	TRM44
YDR007W::chr00_16b	YDR007W	TRP1
YER090W::chr00_8	YER090W	TRP2
YKL211C::chr11_3	YKL211C	TRP3
YDR354W::chr4_7	YDR354W	TRP4
YGR166W::chr7_5	YGR166W	TRS65
YCR084C::chr00_16a	YCR084C	TUP1
YBR165W::chr2_3	YBR165W	UBS1
YDR330W::chr4_6	YDR330W	UBX5
YDR470C::chr4_8	YDR470C	UGO1
YPL003W::chr16_3	YPL003W	ULA1
YLR168C::chr12_3	YLR168C	UPS2
YKL216W::chr11_3	YKL216W	URA1
YDR400W::chr4_7	YDR400W	URH1
YNL054W::chr14_3	YNL054W	VAC7
YEL013W::chr5_2	YEL013W	VAC8
YDL077C::chr4_1	YDL077C	VAM6
YGL212W::chr7_3	YGL212W	VAM7
YDR247W::chr4_6	YDR247W	VHS1
YDL185W::chr4_2	YDL185W	VMA1
YHR039C-B::chr00_3	YHR039C-A	VMA10
YPL234C::chr16_1	YPL234C	VMA11
YPR036W::chr16_4	YPR036W	VMA13
YHR026W::chr00_10	YHR026W	VMA16
YBR127C::chr2_3	YBR127C	VMA2
YGR105W::chr7_4	YGR105W	VMA21
YHR060W::chr8_2	YHR060W	VMA22
YEL027W::chr5_2	YEL027W	VMA3
YKL080W::chr11_1	YKL080W	VMA5
YLR447C::chr00_4	YLR447C	VMA6
YGR020C::chr7_3	YGR020C	VMA7
YEL051W::chr5_2	YEL051W	VMA8
YKL119C::chr11_2	YKL119C	VPH2
YBR097W::chr2_3	YBR097W	VPS15
YPL045W::chr16_3	YPL045W	VPS16
YLR396C::chr12_5	YLR396C	VPS33
YLR240W::chr12_4	YLR240W	VPS34
YLR417W::chr12_5	YLR417W	VPS36
YPR173C::chr16_5	YPR173C	VPS4
YGL095C::chr7_1	YGL095C	VPS45
YJL029C::chr00_13	YJL029C	VPS53
YDR027C::chr4_3	YDR027C	VPS54
YJR044C::chr00_13	YJR044C	VPS55
YDR200C::chr4_5	YDR200C	VPS64
YPL019C::chr16_3	YPL019C	VTC3
YLR090W::chr12_2	YLR090W	XDJ1
YDR369C::chr4_7	YDR369C	XRS2
YNL107W::chr00_16b	YNL107W	YAF9
YHR161C::chr8_3	YHR161C	YAP1801
YBL029W::chr2_1	YBL029W	YBL029W
YBR056W::chr2_2	YBR056W	YBR056W
YBR113W::chr2_3	YBR113W	YBR113W
YCL007C::chr3_1	YCL007C	YCL007C
YCR064C::chr00_16a	YCR064C	YCR064C
YLL055W::chr12_1	YLL055W	YCT1
YNL064C::chr14_3	YNL064C	YDJ1
YDL206W::chr4_3	YDL206W	YDL206W
YDL241W::chr4_3	YDL241W	YDL241W
YDR008C::chr4_3	YDR008C	YDR008C
YDR149C::chr4_5	YDR149C	YDR149C
YDR179W-A::chr4_5	YDR179W-A	YDR179W-A
YDR199W::chr4_5	YDR199W	YDR199W
YDR249C::chr4_6	YDR249C	YDR249C
YDR250C::chr4_6	YDR250C	YDR250C
YDR266C::chr4_6	YDR266C	YDR266C
YDR269C::chr4_6	YDR269C	YDR269C
YDR271C::chr4_6	YDR271C	YDR271C
YDR274C::chr4_6	YDR274C	YDR274C
YDR278C::chr4_6	YDR278C	YDR278C
YDR282C::chr4_6	YDR282C	YDR282C
YDR290W::chr4_6	YDR290W	YDR290W
YDR307W::chr4_6	YDR307W	YDR307W
YDR336W::chr4_6	YDR336W	YDR336W
YDR387C::chr4_7	YDR387C	YDR387C
YDR401W::chr4_7	YDR401W	YDR401W
YDR415C::chr4_7	YDR415C	YDR415C
YDR433W::chr4_7	YDR433W	YDR433W
YDR535C::chr00_2	YDR535C	YDR535C
YEL045C::chr5_2	YEL045C	YEL045C
YER066C-A::chr5_3	YER066C-A	YER066C-A
YGL036W::chr7_1	YGL036W	YGL036W
YGL088W::chr7_1	YGL088W	YGL088W
YGL199C::chr7_3/chr00_12	YGL199C	YGL199C
YGL214W::chr7_3/chr00_12	YGL214W	YGL214W
YGL218W::chr7_3/chr00_12	YGL218W	YGL218W
YGR001C::chr7_3	YGR001C	YGR001C
YGR016W::chr7_3	YGR016W	YGR016W
YGR122C-A::chr00_17a	YGR122C-A	YGR122C-A
YGR160W::chr7_5	YGR160W	YGR160W
YGR290W::chr00_3	YGR290W	YGR290W
YJL059W::chr10_2	YJL059W	YHC3
YHR029C::chr8_1	YHR029C	YHI9
YHR080C::chr8_2	YHR080C	YHR080C
YHR180W::chr00_10	YHR180W	YHR180W
YHR210C::chr8_3	YHR210C	YHR210C
YIL025C::chr9_1	YIL025C	YIL025C
YIL058W::chr00_17b	YIL058W	YIL058W
YIL092W::chr00_17b	YIL092W	YIL092W
YGL198W::chr7_3	YGL198W	YIP4
YJL045W::chr10_2	YJL045W	YJL045W
YJR018W::chr00_13	YJR018W	YJR018W
YKL118W::chr11_2	YKL118W	YKL118W
YPR125W::chr16_5	YPR125W	YLH47
YLL020C::chr12_1	YLL020C	YLL020C
YLR053C::chr12_2	YLR053C	YLR053C
YLR108C::chr12_2	YLR108C	YLR108C
YLR124W::chr12_2	YLR124W	YLR124W
YLR169W::chr12_3	YLR169W	YLR169W
YLR173W::chr12_3	YLR173W	YLR173W
YLR184W::chr12_3	YLR184W	YLR184W
YLR202C::chr12_3	YLR202C	YLR202C
YLR225C::chr12_3	YLR225C	YLR225C
YLR235C::chr12_4	YLR235C	YLR235C
YLR294C::chr12_4	YLR294C	YLR294C
YLR365W::chr12_5	YLR365W	YLR365W
YLR422W::chr00_4	YLR422W	YLR422W
YMR302C::chr13_5	YMR302C	YME2
YML010W-A::chr13_2	YML009W-B	YML009W-B
YML018C::chr13_2	YML018C	YML018C
YML048W-A::chr13_1b	YML047W-A	YML047W-A
YMR031W-A::chr13_2	YMR031W-A	YMR031W-A
YMR099C::chr00_9	YMR099C	YMR099C
YMR158C-B::chr00_4	YMR158C-A	YMR158C-A
YMR194C-A::chr00_4	YMR194C-A	YMR194C-A
YNL011C::chr00_18	YNL011C	YNL011C
YNL046W::chr14_4	YNL046W	YNL046W
YNL058C::chr14_3	YNL058C	YNL058C
YNL108C::chr14_3	YNL108C	YNL108C
YNL109W::chr00_18	YNL109W	YNL109W
YNL115C::chr00_16b	YNL115C	YNL115C
YNL122C::chr14_3	YNL122C	YNL122C
YNL140C::chr00_17b	YNL140C	YNL140C
YNL184C::chr14_2	YNL184C	YNL184C
YNR042W::chr14_4	YNR042W	YNR042W
YNR061C::chr00_4	YNR061C	YNR061C
YNR065C::chr00_4	YNR065C	YNR065C
YOR019W::chr15_1	YOR019W	YOR019W
YOR331C::chr15_4	YOR331C	YOR331C
YKL126W::chr11_2	YKL126W	YPK1
YPL034W::chr00_17b	YPL034W	YPL034W
YPL062W::chr16_3	YPL062W	YPL062W
YPL068C::chr16_3	YPL068C	YPL068C
YPL077C::chr16_3	YPL077C	YPL077C
YPL150W::chr16_2	YPL150W	YPL150W
YPL185W::chr16_2	YPL185W	YPL185W
YPR003C::chr16_3	YPR003C	YPR003C
YPR059C::chr16_4	YPR059C	YPR059C
YPR127W::chr16_5	YPR127W	YPR127W
YPR153W::chr16_5	YPR153W	YPR153W
YLR121C::chr12_2	YLR121C	YPS3
YLR262C::chr12_4	YLR262C	YPT6
YML001W::chr13_2	YML001W	YPT7
YMR089C::chr00_6	YMR089C	YTA12
YIR026C::chr00_3	YIR026C	YVH1
YDR285W::chr4_6	YDR285W	ZIP1
YGL249W::chr7_3	YGL249W	ZIP2
YMR243C::chr13_5	YMR243C	ZRC1
YGR285C::chr00_3	YGR285C	ZUO1

## Sheet: flight
Strain	ORF	Gene
YNR033W::chr00_18	YNR033W	ABZ1
YLR131C::chr12_3	YLR131C	ACE2
YLR144C::chr12_3	YLR144C	ACF2
YDR448W::chr4_8	YDR448W	ADA2
YKL206C::chr11_3	YKL206C	ADD66
YNL220W::chr00_18	YNL220W	ADE12
YGL234W::chr7_3	YGL234W	ADE5,7
YDR408C::chr4_7	YDR408C	ADE8
YOL086C::chr00_6	YOL086C	ADH1
YDR226W::chr4_5	YDR226W	ADK1
YMR282C::chr13_5	YMR282C	AEP2
YIL044C::chr9_1	YIL044C	AGE2
YLR109W::chr12_2	YLR109W	AHP1
YKL037W::chr11_1	YKL037W	AIM26
YBR108W::chr2_3	YBR108W	AIM3
YHR199C::chr8_3	YHR199C	AIM46
YMR092C::chr00_6	YMR092C	AIP1
YDR264C::chr4_6	YDR264C	AKR1
YMR169C::chr00_4	YMR169C	ALD3
YPL061W::chr16_3	YPL061W	ALD6
YNL148C::chr14_2	YNL148C	ALF1
YEL036C::chr5_2	YEL036C	ANP1
YLR102C::chr12_2	YLR102C	APC9
YPL195W::chr16_1	YPL195W	APL5
YBL019W::chr2_1	YBL019W	APN2
YIL040W::chr9_1	YIL040W	APQ12
YBR149W::chr2_3	YBR149W	ARA1
YDR173C::chr4_5	YDR173C	ARG82
YDR127W::chr4_4	YDR127W	ARO1
YPR060C::chr16_4	YPR060C	ARO7
YGL202W::chr7_3	YGL202W	ARO8
YNL059C::chr00_18	YNL059C	ARP5
YLR242C::chr12_4	YLR242C	ARV1
YBL069W::chr2_1	YBL069W	AST1
YBR128C::chr2_3	YBR128C	ATG14
YLR393W::chr12_5	YLR393W	ATP10
YNL315C::chr00_17b	YNL315C	ATP11
YNL315C::chr00_18	YNL315C	ATP11
YJL180C::chr10_1	YJL180C	ATP12
YLR295C::chr12_4	YLR295C	ATP14
YPL271W::chr16_1	YPL271W	ATP15
YDR377W::chr4_7	YDR377W	ATP17
YDR350C::chr4_7	YDR350C	ATP22
YMR098C::chr00_9	YMR098C	ATP25
YDR298C::chr4_6	YDR298C	ATP5
YKL016C::chr11_1	YKL016C	ATP7
YLR114C::chr12_2	YLR114C	AVL9
YMR068W::chr00_6	YMR068W	AVO2
YJL095W::chr10_2	YJL095W	BCK1
YDR375C::chr4_7	YDR375C	BCS1
YIL033C::chr00_17b	YIL033C	BCY1
YLR399C::chr12_5	YLR399C	BDF1
YBR200W::chr2_4	YBR200W	BEM1
YER155C::chr00_5	YER155C	BEM2
YFL006W::chr6_1	YFL007W	BLM10
YER177W::chr00_5	YER177W	BMH1
YNL271C::chr14_1	YNL271C	BNI1
YGR230W::chr00_2	YGR230W	BNS1
YPL084W::chr16_3	YPL084W	BRO1
YDR275W::chr4_6	YDR275W	BSC2
YOL137W::chr00_6	YOL137W	BSC6
YFL025C::chr6_1	YFL025C	BST1
YPL069C::chr16_3	YPL069C	BTS1
YDR252W::chr4_6	YDR252W	BTT1
YGR188C::chr00_10	YGR188C	BUB1
YOR026W::chr15_1	YOR026W	BUB3
YJL188C::chr10_1	YJL188C	BUD19
YMR014W::chr13_2	YMR014W	BUD22
YCR047C::chr00_16a	YCR047C	BUD23
YER014C-A::chr5_3	YER014C-A	BUD25
YFL023W::chr6_1	YFL023W	BUD27
YLR062C::chr12_2	YLR062C	BUD28
YDL151C::chr4_2	YDL151C	BUD30
YCR063W::chr00_1	YCR063W	BUD31
YGR262C::chr00_3	YGR262C	BUD32
YLR226W::chr12_3	YLR226W	BUR2
YKR036C::chr00_14	YKR036C	CAF4
YPL048W::chr16_3	YPL048W	CAM1
YOR125C::chr15_2	YOR125C	CAT5
YGR036C::chr7_4	YGR036C	CAX4
YPL215W::chr16_1	YPL215W	CBP3
YKL208W::chr11_3	YKL208W	CBT1
YDR270W::chr4_6	YDR270W	CCC2
YGL206C::chr7_3	YGL206C	CHC1
YBR274W::chr00_1	YBR274W	CHK1
YPL008W::chr16_3	YPL008W	CHL1
YBR038W::chr2_2	YBR038W	CHS2
YMR198W::chr00_11	YMR198W	CIK1
YNL298W::chr14_1	YNL298W	CLA4
YGR167W::chr7_5	YGR167W	CLC1
YAL040C::chr1_1	YAL040C	CLN3
YFR014C::chr6_1	YFR014C	CMK1
YNL225C::chr14_2	YNL225C	CNM67
YIL157C::chr9_2	YIL157C	COA1
YLR218C::chr12_3	YLR218C	COA4
YGL223C::chr7_3	YGL223C	COG1
YOL096C::chr00_6	YOL096C	COQ3
YML110C::chr00_9	YML110C	COQ5
YGR255C::chr00_17a	YGR255C	COQ6
YBL045C::chr2_1	YBL045C	COR1
YPL172C::chr16_2	YPL172C	COX10
YER141W::chr00_5	YER141W	COX15
YGR062C::chr7_4	YGR062C	COX18
YDR231C::chr4_5	YDR231C	COX20
YHR116W::chr8_2	YHR116W	COX23
YNL052W::chr00_16b	YNL052W	COX5A
YMR256C::chr13_5	YMR256C	COX7
YLR216C::chr12_3	YLR216C	CPR6
YNL130C::chr00_16b	YNL130C	CPT1
YLR429W::chr00_4	YLR429W	CRN1
YMR025W::chr13_2	YMR025W	CSI1
YMR048W::chr00_11	YMR048W	CSM3
YDR179C::chr4_5	YDR179C	CSN9
YMR078C::chr00_6	YMR078C	CTF18
YPL018W::chr16_3	YPL018W	CTF19
YPR135W::chr16_5	YPR135W	CTF4
YHR191C::chr00_8	YHR191C	CTF8
YKL139W::chr00_14	YKL139W	CTK1
YJL006C::chr00_13	YJL006C	CTK2
YML112W::chr00_9	YML112W	CTK3
YPR124W::chr16_5	YPR124W	CTR1
YPL064C::chr16_3	YPL064C	CWC27
YJR048W::chr00_13	YJR048W	CYC1
YAL039C::chr1_1	YAL039C	CYC3
YBR112C::chr00_16a	YBR112C	CYC8
YGR155W::chr00_11	YGR155W	CYS4
YIR027C::chr00_3	YIR027C	DAL1
YGR092W::chr00_14	YGR092W	DBF2
YKR024C::chr11_3	YKR024C	DBP7
YCL016C::chr3_1	YCL016C	DCC1
YLR128W::chr12_3	YLR128W	DCN1
YER143W::chr00_5	YER143W	DDI1
YKL054C::chr11_1	YKL054C	DEF1
YFL001W::chr00_17a	YFL001W	DEG1
YBR201W::chr2_4	YBR201W	DER1
YIL049W::chr9_1	YIL049W	DFG10
YOR311C::chr15_4	YOR311C	DGK1
YOR080W::chr15_1	YOR080W	DIA2
YHR011W::chr8_1	YHR011W	DIA4
YPL049C::chr16_3	YPL049C	DIG1
YDR263C::chr4_6	YDR263C	DIN7
YIR004W::chr9_2	YIR004W	DJP1
YJL065C::chr10_2	YJL065C	DLS1
YGL240W::chr7_3	YGL240W	DOC1
YDR273W::chr4_6	YDR273W	DON1
YKL191W::chr11_3	YKL191W	DPH2
YDR284C::chr4_6	YDR284C	DPP1
YGL196W::chr7_3	YGL196W	DSD1
YHR143W::chr8_3	YHR143W	DSE2
YKR054C::chr11_3	YKR054C	DYN1
YDR359C::chr4_7	YDR359C	EAF1
YKL204W::chr00_14	YKL204W	EAP1
YHL030W::chr8_1	YHL030W	ECM29
YLR436C::chr00_4	YLR436C	ECM30
YER176W::chr00_5	YER176W	ECM32
YLR443W::chr00_4	YLR443W	ECM7
YGR272C::chr00_17a	YGR271C-A	EFG1
YPL046C::chr16_3	YPL046C	ELC1
YKL048C::chr11_1	YKL048C	ELM1
YDR512C::chr00_17a	YDR512C	EMI1
YOL071W::chr15_5	YOL071W	EMI5
YGL200C::chr7_3	YGL200C	EMP24
YLR083C::chr12_2	YLR083C	EMP70
YNL080C::chr00_16b	YNL080C	EOS1
YMR202W::chr13_4	YMR202W	ERG2
YNL280C::chr14_1	YNL280C	ERG24
YER044C::chr5_3	YER044C	ERG28
YGL012W::chr7_1	YGL012W	ERG4
YOR016C::chr15_1	YOR016C	ERP4
YDR363W::chr4_7	YDR363W	ESC2
YFR019W::chr00_15	YFR019W	FAB1
YKR016W::chr11_3	YKR016W	FCJ1
YOR383C::chr15_4	YOR383C	FIT3
YIL134W::chr9_2	YIL134W	FLX1
YHR176W::chr8_3	YHR176W	FMO1
YNR060W::chr00_4	YNR060W	FRE4
YBL042C::chr2_1	YBL042C	FUI1
YAL035W::chr1_1	YAL035W	FUN12
YNL133C::chr14_3	YNL133C	FYV6
YLR068W::chr12_2	YLR068W	FYV7
YBR179C::chr2_4	YBR179C	FZO1
YGL195W::chr7_3	YGL195W	GCN1
YDR283C::chr4_6	YDR283C	GCN2
YGR252W::chr00_17a	YGR252W	GCN5
YBR187W::chr2_4	YBR187W	GDT1
YLR091W::chr12_2	YLR091W	GEP5
YGL020C::chr7_1	YGL020C	GET1
YDR358W::chr4_7	YDR358W	GGA1
YER054C::chr5_3	YER054C	GIP2
YER107C::chr00_5	YER107C	GLE2
YPL091W::chr16_3	YPL091W	GLR1
YHR183W::chr8_3	YHR183W	GND1
YJL184W::chr00_14	YJL184W	GON7
YJR090C::chr00_12	YJR090C	GRR1
YPL059W::chr16_3	YPL059W	GRX5
YLR364W::chr12_5	YLR364W	GRX8
YGL237C::chr7_3	YGL237C	HAP2
YBL021C::chr2_1	YBL021C	HAP3
YOR358W::chr15_4	YOR358W	HAP5
YDR295C::chr4_6	YDR295C	HDA2
YPR179C::chr16_5	YPR179C	HDA3
YBL032W::chr2_1	YBL032W	HEK2
YER014W::chr5_2	YER014W	HEM14
YPL254W::chr16_1	YPL254W	HFI1
YFR025C::chr00_15	YFR025C	HIS2
YJR055W::chr00_13	YJR055W	HIT1
YDR420W::chr4_7	YDR420W	HKR1
YMR032W::chr13_2	YMR032W	HOF1
YDR158W::chr4_5	YDR158W	HOM2
YJR139C::chr00_12	YJR139C	HOM6
YBR215W::chr2_4	YBR215W	HPC2
YDR138W::chr4_4	YDR138W	HPR1
YKL101W::chr11_2	YKL101W	HSL1
YBR133C::chr2_3	YBR133C	HSL7
YBL003C::chr2_1	YBL003C	HTA2
YOL012C::chr15_5	YOL012C	HTZ1
YER039C::chr5_3	YER039C	HVG1
YNR072W::chr00_6	YNR072W	HXT17
YDR345C::chr4_7	YDR345C	HXT3
YPL250C::chr16_1	YPL250C	ICY2
YOR136W::chr15_2	YOR136W	IDH2
YLR174W::chr12_3	YLR174W	IDP2
YNL009W::chr14_4	YNL009W	IDP3
YNL215W::chr14_2	YNL215W	IES2
YER092W::chr00_8	YER092W	IES5
YEL044W::chr5_2	YEL044W	IES6
YBR159W::chr2_3	YBR159W	IFA38
YCR071C::chr00_1	YCR071C	IMG2
YBR107C::chr2_3	YBR107C	IML3
YMR150C::chr13_4	YMR150C	IMP1
YIL154C::chr9_2	YIL154C	IMP2'
YMR044W::chr13_2	YMR044W	IOC4
YDR315C::chr4_6	YDR315C	IPK1
YPL017C::chr00_17b	YPL017C	IRC15
YIR036C::chr00_3	YIR036C	IRC24
YDR332W::chr4_6	YDR332W	IRC3
YHR079C::chr8_2	YHR079C	IRE1
YKR019C::chr00_14	YKR019C	IRS4
YLL027W::chr12_1	YLL027W	ISA1
YPL040C::chr16_3	YPL040C	ISM1
YBR086C::chr2_3	YBR086C	IST2
YOL101C::chr00_6	YOL101C	IZH4
YBR017C::chr2_2	YBR017C	KAP104
YGL241W::chr7_3	YGL241W	KAP114
YNL322C::chr14_1	YNL322C	KRE1
YDR532C::chr4_8	YDR532C	KRE28
YPR159W::chr16_5	YPR159W	KRE6
YBL006C::chr2_1	YBL006C	LDB7
YOR123C::chr15_2	YOR123C	LEO1
YPL055C::chr16_3	YPL055C	LGE1
YHR156C::chr8_3	YHR156C	LIN1
YFR001W::chr6_1	YFR001W	LOC1
YCL034W::chr3_1	YCL034W	LSB5
YGR244C::chr00_2	YGR244C	LSC2
YPL004C::chr00_17b	YPL004C	LSP1
YAL024C::chr00_17a	YAL024C	LTE1
YKL143W::chr11_2	YKL143W	LTV1
YJL013C::chr00_13	YJL013C	MAD3
YBR299W::chr00_17a	YBR299W	MAL32
YLR244C::chr12_4	YLR244C	MAP1
YDR318W::chr4_6	YDR318W	MCM21
YFL016C::chr00_17a	YFL016C	MDJ1
YAL010C::chr1_1	YAL010C	MDM10
YOL009C::chr15_5	YOL009C	MDM12
YOL076W::chr15_5	YOL076W	MDM20
YGL219C::chr00_14	YGL219C	MDM34
YGL197W::chr7_3	YGL197W	MDS3
YKR007W::chr11_3	YKR007W	MEH1
YPR138C::chr16_5	YPR138C	MEP3
YIL128W::chr9_2	YIL128W	MET18
YNL277W::chr14_1	YNL277W	MET2
YOL064C::chr15_5	YOL064C	MET22
YPL038W::chr16_3	YPL038W	MET31
YDR253C::chr4_6	YDR253C	MET32
YOR241W::chr15_3	YOR241W	MET7
YPL060W::chr16_3	YPL060W	MFM1
YIR033W::chr00_3	YIR033W	MGA2
YDR296W::chr4_6	YDR296W	MHR1
YEL007W::chr5_2	YEL007W	MIT1
YNL117W::chr14_3	YNL117W	MLS1
YLR320W::chr12_4	YLR320W	MMS22
YBR098W::chr2_3	YBR098W	MMS4
YIR025W::chr00_3	YIR025W	MND2
YHR204W::chr8_3	YHR204W	MNL1
YDR245W::chr4_6	YDR245W	MNN10
YPL050C::chr16_3	YPL050C	MNN9
YNL297C::chr14_1	YNL297C	MON2
YHR162W::chr00_8	YHR162W	MPC2
YGL064C::chr7_1	YGL064C	MRH4
YKL003C::chr11_1	YKL003C	MRP17
YBL090W::chr2_1	YBL090W	MRP21
YNL284C::chr00_18	YNL284C	MRPL10
YBL038W::chr2_1	YBL038W	MRPL16
YKR085C::chr00_15	YKR085C	MRPL20
YMR193W::chr13_4	YMR193W	MRPL24
YGR076C::chr7_4	YGR076C	MRPL25
YBR282W::chr00_1	YBR282W	MRPL27
YMR024W::chr13_2	YMR024W	MRPL3
YMR286W::chr13_5	YMR286W	MRPL33
YDR322W::chr4_6	YDR322W	MRPL35
YMR225C::chr13_4	YMR225C	MRPL44
YDR237W::chr4_5	YDR237W	MRPL7
YNR036C::chr14_4	YNR036C	MRPS12
YDR337W::chr4_6	YDR337W	MRPS28
YMR158W::chr00_8	YMR158W	MRPS8
YBR146W::chr2_3	YBR146W	MRPS9
YKL009W::chr11_1	YKL009W	MRT4
YHR120W::chr8_2	YHR120W	MSH1
YNL073W::chr00_16b	YNL073W	MSK1
YIR009W::chr9_2	YIR009W	MSL1
YDR335W::chr4_6	YDR335W	MSN5
YDR194C::chr4_5	YDR194C	MSS116
YPR134W::chr16_5	YPR134W	MSS18
YKL194C::chr00_14	YKL194C	MST1
YDR268W::chr4_6	YDR268W	MSW1
YGL226W::chr7_3	YGL226W	MTC3
YEL033W::chr5_2	YEL033W	MTC7
YMR228W::chr13_4	YMR228W	MTF1
YDR277C::chr4_6	YDR277C	MTH1
YGR257C::chr00_17a	YGR257C	MTM1
YLR382C::chr00_11	YLR382C	NAM2
YPR131C::chr16_5	YPR131C	NAT3
YPL006W::chr16_3	YPL006W	NCR1
YGL211W::chr7_3	YGL211W	NCS6
YDR176W::chr4_5	YDR176W	NGG1
YGL221C::chr7_3	YGL221C	NIF3
YLR315W::chr12_4	YLR315W	NKP2
YLR363C::chr12_5	YLR363C	NMD4
YLR285W::chr12_4	YLR285W	NNT1
YDL213C::chr4_3	YDL213C	NOP6
YIL038C::chr9_1	YIL038C	NOT3
YPR072W::chr16_4	YPR072W	NOT5
YDR432W::chr4_7	YDR432W	NPL3
YMR091C::chr00_6	YMR091C	NPL6
YGR159C::chr7_5	YGR159C	NSR1
YKL057C::chr11_1	YKL057C	NUP120
YKR082W::chr00_3	YKR082W	NUP133
YML103C::chr00_9	YML103C	NUP188
YDL116W::chr4_2	YDL116W	NUP84
YHR195W::chr8_3	YHR195W	NVJ1
YPR091C::chr00_18	YPR091C	NVJ2
YHL029C::chr8_1	YHL029C	OCA5
YGL038C::chr7_1	YGL038C	OCH1
YKL134C::chr11_2	YKL134C	OCT1
YKR035C::chr11_3	YKR035C	OPI8
YLR338W::chr12_5	YLR338W	OPI9
YBR129C::chr2_3	YBR129C	OPY1
YDL232W::chr4_3	YDL232W	OST4
YGL226C-A::chr7_3	YGL226C-A	OST5
YLR054C::chr12_2	YLR054C	OSW2
YFL044C::chr6_1	YFL044C	OTU1
YOR269W::chr00_17b	YOR269W	PAC1
YBR279W::chr00_1	YBR279W	PAF1
YMR165C::chr13_4	YMR165C	PAH1
YDR348C::chr4_7	YDR348C	PAL1
YGL248W::chr7_3	YGL248W	PDE1
YOR153W::chr15_2	YOR153W	PDR5
YGR193C::chr7_5	YGR193C	PDX1
YBR035C::chr2_2	YBR035C	PDX3
YOR036W::chr15_1	YOR036W	PEP12
YLR148W::chr12_3	YLR148W	PEP3
YDR323C::chr4_6	YDR323C	PEP7
YCR044C::chr00_1	YCR044C	PER1
YDR079W::chr4_4	YDR079W	PET100
YMR257C::chr13_5	YMR257C	PET111
YBL080C::chr2_1	YBL080C	PET112
YER153C::chr00_5	YER153C	PET122
YJR034W::chr00_13	YJR034W	PET191
YLR067C::chr12_2	YLR067C	PET309
YNL003C::chr14_4	YNL003C	PET8
YOL044W::chr15_5	YOL044W	PEX15
YHR160C::chr8_3	YHR160C	PEX18
YHR150W::chr8_3	YHR150W	PEX28
YGR004W::chr7_3	YGR004W	PEX31
YBR168W::chr00_16a	YBR168W	PEX32
YGR240C::chr00_2	YGR240C	PFK1
YMR205C::chr13_4	YMR205C	PFK2
YOL136C::chr00_6	YOL136C	PFK27
YPL031C::chr16_3	YPL031C	PHO85
YBL022C::chr2_1	YBL022C	PIM1
YOR104W::chr15_2	YOR104W	PIN2
YPR154W::chr16_5	YPR154W	PIN3
YBL051C::chr2_1	YBL051C	PIN4
YOL100W::chr00_6	YOL100W	PKH2
YPL268W::chr00_15	YPL268W	PLC1
YDR276C::chr4_6	YDR276C	PMP3
YOR321W::chr15_4	YOR321W	PMT3
YPL144W::chr16_2	YPL144W	POC4
YIL122W::chr9_2	YIL122W	POG1
YLL023C::chr12_1	YLL023C	POM33
YNR052C::chr00_15	YNR052C	POP2
YPL188W::chr16_1	YPL188W	POS5
YDR435C::chr4_7	YDR435C	PPM1
YDR452W::chr4_8	YDR452W	PPN1
YMR297W::chr13_5	YMR297W	PRC1
YDR300C::chr4_6	YDR300C	PRO1
YGR006W::chr7_3	YGR006W	PRP18
YKL181W::chr11_2	YKL181W	PRS1
YHL011C::chr00_10	YHL011C	PRS3
YBL064C::chr2_1	YBL064C	PRX1
YBL046W::chr2_1	YBL046W	PSY4
YHR189W::chr8_3	YHR189W	PTH1
YNL016W::chr14_4	YNL016W	PUB1
YGR183C::chr7_5	YGR183C	QCR9
YML095C::chr00_9	YML095C	RAD10
YBR114W::chr2_3	YBR114W	RAD16
YJR035W::chr00_13	YJR035W	RAD26
YNL250W::chr00_8	YNL250W	RAD50
YML032C::chr13_2	YML032C	RAD52
YGL058W::chr7_1	YGL058W	RAD6
YGL246C::chr7_3	YGL246C	RAI1
YOR101W::chr15_2	YOR101W	RAS1
YJR033C::chr00_13	YJR033C	RAV1
YJL204C::chr10_1	YJL204C	RCY1
YHR157W::chr8_3	YHR157W	REC104
YLR059C::chr12_2	YLR059C	REX2
YLR176C::chr12_3	YLR176C	RFX1
YER067W::chr5_3	YER067W	RGI1
YBL033C::chr2_1	YBL033C	RIB1
YOL143C::chr00_10	YOL143C	RIB4
YEL024W::chr5_2	YEL024W	RIP1
YDR257C::chr4_6	YDR257C	RKM4
YPL089C::chr16_3	YPL089C	RLM1
YDL001W::chr4_1	YDL001W	RMD1
YDR255C::chr4_6	YDR255C	RMD5
YFR048W::chr00_2	YFR048W	RMD8
YGL107C::chr7_2	YGL107C	RMD9
YPL024W::chr16_3	YPL024W	RMI1
YER070W::chr5_3	YER070W	RNR1
YGR180C::chr7_5	YGR180C	RNR4
YPR065W::chr16_4	YPR065W	ROX1
YBL093C::chr2_1	YBL093C	ROX3
YJL140W::chr00_14	YJL140W	RPB4
YGL070C::chr7_1	YGL070C	RPB9
YMR142C::chr00_8	YMR142C	RPL13B
YBL027W::chr2_1	YBL027W	RPL19B
YPL079W::chr16_3	YPL079W	RPL21B
YLR061W::chr12_2	YLR061W	RPL22A
YDL075W::chr4_1	YDL075W	RPL31A
YJL189W::chr00_14	YJL189W	RPL39
YGL076C::chr7_1	YGL076C	RPL7A
YDR382W::chr4_7	YDR382W	RPP2B
YLR048W::chr12_2	YLR048W	RPS0B
YOR293W::chr15_4	YOR293W	RPS10A
YMR143W::chr13_4	YMR143W	RPS16A
YLR441C::chr00_4	YLR441C	RPS1A
YPR132W::chr16_5	YPR132W	RPS23B
YLR333C::chr12_5	YLR333C	RPS25B
YPL090C::chr16_3	YPL090C	RPS6A
YIL153W::chr9_2	YIL153W	RRD1
YHR038W::chr8_1	YHR038W	RRF1
YNL105W::chr00_16b	YNL105W	RRT16
YPL193W::chr16_1	YPL193W	RSA1
YLR221C::chr12_3	YLR221C	RSA3
YLR357W::chr12_5	YLR357W	RSC2
YDR175C::chr4_5	YDR175C	RSM24
YPL183W-A::chr00_11	YPL183W-A	RTC6
YGL244W::chr7_3	YGL244W	RTF1
YGL252C::chr7_3	YGL252C	RTG2
YDR289C::chr4_6	YDR289C	RTT103
YHR154W::chr8_3	YHR154W	RTT107
YLL002W::chr12_1	YLL002W	RTT109
YCR009C::chr3_1	YCR009C	RVS161
YKL212W::chr11_3	YKL212W	SAC1
YDR129C::chr4_4	YDR129C	SAC6
YDR389W::chr4_7	YDR389W	SAC7
YNL083W::chr00_16b	YNL083W	SAL1
YJL098W::chr10_2	YJL098W	SAP185
YKR028W::chr00_14	YKR028W	SAP190
YBL052C::chr2_1	YBL052C	SAS3
YDR351W::chr4_7	YDR351W	SBE2
YKL148C::chr11_2	YKL148C	SDH1
YLR268W::chr12_4	YLR268W	SEC22
YBR171W::chr2_3	YBR171W	SEC66
YKR029C::chr00_14	YKR029C	SET3
YLR403W::chr12_5	YLR403W	SFP1
YPR198W::chr16_5	YPR198W	SGE1
YOR073W::chr15_1	YOR073W	SGO1
YGL228W::chr7_3	YGL228W	SHE10
YOR035C::chr15_1	YOR035C	SHE4
YBL058W::chr2_1	YBL058W	SHP1
YLR079W::chr12_2	YLR079W	SIC1
YOL004W::chr15_5	YOL004W	SIN3
YNL236W::chr14_2	YNL236W	SIN4
YDR422C::chr4_7	YDR422C	SIP1
YGL208W::chr7_3	YGL208W	SIP2
YJL089W::chr10_2	YJL089W	SIP4
YPR189W::chr16_5	YPR189W	SKI3
YPL026C::chr16_3	YPL026C	SKS1
YBL007C::chr2_1	YBL007C	SLA1
YNL243W::chr14_2	YNL243W	SLA2
YBR156C::chr2_3	YBR156C	SLI15
YNL047C::chr00_18	YNL047C	SLM2
YBR266C::chr2_4	YBR266C	SLM6
YHR030C::chr8_1	YHR030C	SLT2
YDL013W::chr4_1	YDL013W	SLX5
YER116C::chr00_5	YER116C	SLX8
YNL196C::chr14_2	YNL196C	SLZ1
YPL027W::chr00_17b	YPL027W	SMA1
YML066C::chr00_15	YML066C	SMA2
YNR023W::chr14_4	YNR023W	SNF12
YBR289W::chr00_16a	YBR289W	SNF5
YHL025W::chr00_8	YHL025W	SNF6
YPR101W::chr16_4	YPR101W	SNT309
YOR357C::chr15_4	YOR357C	SNX3
YGL127C::chr7_2	YGL127C	SOH1
YCR073W-A::chr00_1	YCR073W-A	SOL2
YHR163W::chr8_3	YHR163W	SOL3
YMR066W::chr00_6	YMR066W	SOV1
YAL047C::chr00_12	YAL047C	SPC72
YHR014W::chr8_1	YHR014W	SPO13
YKR031C::chr11_3	YKR031C	SPO14
YJL127C::chr10_2	YJL127C	SPT10
YOL148C::chr00_18	YOL148C	SPT20
YDR392W::chr4_7	YDR392W	SPT3
YBR081C::chr2_3	YBR081C	SPT7
YGR104C::chr7_4	YGR104C	SRB5
YKR091W::chr00_4	YKR091W	SRL3
YMR101C::chr00_9	YMR101C	SRT1
YNL138W::chr00_17b	YNL138W	SRV2
YDR293C::chr4_6	YDR293C	SSD1
YBR283C::chr00_1	YBR283C	SSH1
YLR369W::chr12_5	YLR369W	SSQ1
YLR452C::chr00_4	YLR452C	SST2
YHR178W::chr8_3	YHR178W	STB5
YMR125W::chr00_9	YMR125W	STO1
YLR372W::chr12_5	YLR372W	SUR4
YDR346C::chr4_7	YDR346C	SVF1
YDR320C::chr4_6	YDR320C	SWA2
YAR044W::chr1_1	YAR042W	SWH1
YJL176C::chr10_1	YJL176C	SWI3
YLR182W::chr12_3	YLR182W	SWI6
YDR260C::chr4_6	YDR260C	SWM1
YLR251W::chr12_4	YLR251W	SYM1
YGL243W::chr7_3	YGL243W	TAD1
YPL129W::chr16_2	YPL129W	TAF14
YBR150C::chr00_16a	YBR150C	TBS1
YOR086C::chr15_1	YOR086C	TCB1
YBR044C::chr2_2	YBR044C	TCM62
YBR118W::chr2_3	YBR118W	TEF2
YBL088C::chr2_1	YBL088C	TEL1
YNL128W::chr14_3	YNL128W	TEP1
YNL139C::chr14_3	YNL139C	THO2
YOL072W::chr15_5	YOL072W	THP1
YHR167W::chr8_3	YHR167W	THP2
YHR025W::chr00_10	YHR025W	THR1
YCR053W::chr00_16a	YCR053W	THR4
YKR059W::chr11_3	YKR059W	TIF1
YPR163C::chr16_5	YPR163C	TIF3
YLR234W::chr12_4	YLR234W	TOP3
YBR162C::chr2_3	YBR162C	TOS1
YNL300W::chr00_8	YNL300W	TOS6
YAL016W::chr00_12	YAL016W	TPD3
YKL166C::chr11_2	YKL166C	TPK3
YNL079C::chr00_16b	YNL079C	TPM1
YBR126C::chr2_3	YBR126C	TPS1
YMR261C::chr13_5	YMR261C	TPS3
YOL093W::chr00_6	YOL093W	TRM10
YML005W::chr13_2	YML005W	TRM12
YPL030W::chr16_3	YPL030W	TRM44
YDR165W::chr4_5	YDR165W	TRM82
YDR007W::chr00_16b	YDR007W	TRP1
YKL211C::chr11_3	YKL211C	TRP3
YDR354W::chr4_7	YDR354W	TRP4
YGR166W::chr7_5	YGR166W	TRS65
YCR084C::chr00_16a	YCR084C	TUP1
YLR425W::chr00_4	YLR425W	TUS1
YMR304W::chr13_5	YMR304W	UBP15
YML013W::chr13_2	YML013W	UBX2
YDR330W::chr4_6	YDR330W	UBX5
YBR273C::chr00_1	YBR273C	UBX7
YDR470C::chr4_8	YDR470C	UGO1
YKR044W::chr11_3	YKR044W	UIP5
YLR168C::chr12_3	YLR168C	UPS2
YKL216W::chr11_3	YKL216W	URA1
YNL054W::chr14_3	YNL054W	VAC7
YEL013W::chr5_2	YEL013W	VAC8
YDL077C::chr4_1	YDL077C	VAM6
YGL212W::chr7_3	YGL212W	VAM7
YDR247W::chr4_6	YDR247W	VHS1
YLR373C::chr12_5	YLR373C	VID22
YDL185W::chr4_2	YDL185W	VMA1
YHR039C-B::chr00_3	YHR039C-A	VMA10
YPL234C::chr16_1	YPL234C	VMA11
YPR036W::chr16_4	YPR036W	VMA13
YHR026W::chr00_10	YHR026W	VMA16
YBR127C::chr2_3	YBR127C	VMA2
YGR105W::chr7_4	YGR105W	VMA21
YHR060W::chr8_2	YHR060W	VMA22
YEL027W::chr5_2	YEL027W	VMA3
YKL080W::chr11_1	YKL080W	VMA5
YLR447C::chr00_4	YLR447C	VMA6
YGR020C::chr7_3	YGR020C	VMA7
YEL051W::chr5_2	YEL051W	VMA8
YKL119C::chr11_2	YKL119C	VPH2
YBR097W::chr2_3	YBR097W	VPS15
YPL045W::chr16_3	YPL045W	VPS16
YLR396C::chr12_5	YLR396C	VPS33
YLR240W::chr12_4	YLR240W	VPS34
YLR417W::chr12_5	YLR417W	VPS36
YPR173C::chr16_5	YPR173C	VPS4
YGL095C::chr7_1	YGL095C	VPS45
YKR020W::chr11_3	YKR020W	VPS51
YDR484W::chr4_8	YDR484W	VPS52
YJL029C::chr00_13	YJL029C	VPS53
YDR027C::chr4_3	YDR027C	VPS54
YJR044C::chr00_13	YJR044C	VPS55
YDR200C::chr4_5	YDR200C	VPS64
YER072W::chr5_3	YER072W	VTC1
YLR090W::chr12_2	YLR090W	XDJ1
YDR369C::chr4_7	YDR369C	XRS2
YNL107W::chr00_16b	YNL107W	YAF9
YHR161C::chr8_3	YHR161C	YAP1801
YBL059W::chr2_1	YBL059W	YBL059W
YBL065W::chr2_1	YBL065W	YBL065W
YBL081W::chr2_1	YBL081W	YBL081W
YBL083C::chr2_1	YBL083C	YBL083C
YBR113W::chr2_3	YBR113W	YBR113W
YCL007C::chr3_1	YCL007C	YCL007C
YCR064C::chr00_16a	YCR064C	YCR064C
YNL064C::chr14_3	YNL064C	YDJ1
YDL206W::chr4_3	YDL206W	YDL206W
YDR008C::chr4_3	YDR008C	YDR008C
YDR179W-A::chr4_5	YDR179W-A	YDR179W-A
YDR199W::chr4_5	YDR199W	YDR199W
YDR230W::chr4_5	YDR230W	YDR230W
YDR250C::chr4_6	YDR250C	YDR250C
YDR266C::chr4_6	YDR266C	YDR266C
YDR269C::chr4_6	YDR269C	YDR269C
YDR271C::chr4_6	YDR271C	YDR271C
YDR274C::chr4_6	YDR274C	YDR274C
YDR278C::chr4_6	YDR278C	YDR278C
YDR282C::chr4_6	YDR282C	YDR282C
YDR290W::chr4_6	YDR290W	YDR290W
YDR333C::chr4_6	YDR333C	YDR333C
YDR336W::chr4_6	YDR336W	YDR336W
YDR374C::chr4_7	YDR374C	YDR374C
YDR401W::chr4_7	YDR401W	YDR401W
YDR415C::chr4_7	YDR415C	YDR415C
YDR433W::chr4_7	YDR433W	YDR433W
YDR455C::chr4_8	YDR455C	YDR455C
YEL045C::chr5_2	YEL045C	YEL045C
YER066C-A::chr5_3	YER066C-A	YER066C-A
YFL013W-A::chr00_15	YFL013W-A	YFL013W-A
YFL015C::chr6_1	YFL015C	YFL015C
YGL036W::chr7_1	YGL036W	YGL036W
YGL088W::chr7_1	YGL088W	YGL088W
YGL199C::chr7_3/chr00_12	YGL199C	YGL199C
YGL214W::chr7_3/chr00_12	YGL214W	YGL214W
YGL218W::chr7_3/chr00_12	YGL218W	YGL218W
YGL262W::chr7_3	YGL262W	YGL262W
YGR001C::chr7_3	YGR001C	YGR001C
YGR016W::chr7_3	YGR016W	YGR016W
YGR122W::chr7_4	YGR122W	YGR122W
YGR160W::chr7_5	YGR160W	YGR160W
YJL059W::chr10_2	YJL059W	YHC3
YHR029C::chr8_1	YHR029C	YHI9
YHR127W::chr00_10	YHR127W	YHR127W
YHR180W::chr00_10	YHR180W	YHR180W
YHR210C::chr8_3	YHR210C	YHR210C
YIL025C::chr9_1	YIL025C	YIL025C
YIL058W::chr00_17b	YIL058W	YIL058W
YIL092W::chr00_17b	YIL092W	YIL092W
YIL152W::chr9_2	YIL152W	YIL152W
YGL198W::chr7_3	YGL198W	YIP4
YJL045W::chr10_2	YJL045W	YJL045W
YJR018W::chr00_13	YJR018W	YJR018W
YKL069W::chr11_1	YKL069W	YKL069W
YKL118W::chr11_2	YKL118W	YKL118W
YKR032W::chr11_3	YKR032W	YKR032W
YPR125W::chr16_5	YPR125W	YLH47
YLL020C::chr12_1	YLL020C	YLL020C
YLR108C::chr12_2	YLR108C	YLR108C
YLR124W::chr12_2	YLR124W	YLR124W
YLR169W::chr12_3	YLR169W	YLR169W
YLR173W::chr12_3	YLR173W	YLR173W
YLR184W::chr12_3	YLR184W	YLR184W
YLR202C::chr12_3	YLR202C	YLR202C
YLR235C::chr12_4	YLR235C	YLR235C
YLR365W::chr12_5	YLR365W	YLR365W
YML010W-A::chr13_2	YML009W-B	YML009W-B
YML013C-A::chr13_2	YML012C-A	YML012C-A
YML048W-A::chr13_1b	YML047W-A	YML047W-A
YML122C::chr00_9	YML122C	YML122C
YMR031W-A::chr13_2	YMR031W-A	YMR031W-A
YMR099C::chr00_9	YMR099C	YMR099C
YMR158C-B::chr00_4	YMR158C-A	YMR158C-A
YMR194C-A::chr00_4	YMR194C-A	YMR194C-A
YMR262W::chr13_5	YMR262W	YMR262W
YNL058C::chr14_3	YNL058C	YNL058C
YNL108C::chr14_3	YNL108C	YNL108C
YNL109W::chr00_18	YNL109W	YNL109W
YNL122C::chr14_3	YNL122C	YNL122C
YNL140C::chr00_17b	YNL140C	YNL140C
YNL170W::chr14_2	YNL170W	YNL170W
YNL184C::chr14_2	YNL184C	YNL184C
YNL198C::chr14_2	YNL198C	YNL198C
YNL217W::chr14_2	YNL217W	YNL217W
YNR042W::chr14_4	YNR042W	YNR042W
YNR065C::chr00_4	YNR065C	YNR065C
YOL107W::chr00_6	YOL107W	YOL107W
YOR019W::chr15_1	YOR019W	YOR019W
YOR331C::chr15_4	YOR331C	YOR331C
YKL126W::chr11_2	YKL126W	YPK1
YPL025C::chr16_3	YPL025C	YPL025C
YPL034W::chr00_17b	YPL034W	YPL034W
YPL062W::chr16_3	YPL062W	YPL062W
YPL068C::chr16_3	YPL068C	YPL068C
YPL077C::chr16_3	YPL077C	YPL077C
YPL260W::chr16_1	YPL260W	YPL260W
YPR003C::chr16_3	YPR003C	YPR003C
YPR099C::chr16_4	YPR099C	YPR099C
YPR123C::chr16_5	YPR123C	YPR123C
YPR127W::chr16_5	YPR127W	YPR127W
YPR153W::chr16_5	YPR153W	YPR153W
YLR121C::chr12_2	YLR121C	YPS3
YNL093W::chr00_16b	YNL093W	YPT53
YLR262C::chr12_4	YLR262C	YPT6
YHR155W::chr8_3	YHR155W	YSP1
YMR089C::chr00_6	YMR089C	YTA12
YDR285W::chr4_6	YDR285W	ZIP1
YGL249W::chr7_3	YGL249W	ZIP2
YMR243C::chr13_5	YMR243C	ZRC1
YGR285C::chr00_3	YGR285C	ZUO1

## Sheet: ground+NaCl
Strain	ORF	Gene
YNR033W::chr00_18	YNR033W	ABZ1
YLR144C::chr12_3	YLR144C	ACF2
YLR304C::chr12_4	YLR304C	ACO1
YKL206C::chr11_3	YKL206C	ADD66
YNL220W::chr00_18	YNL220W	ADE12
YGL234W::chr7_3	YGL234W	ADE5,7
YOL086C::chr00_6	YOL086C	ADH1
YDR226W::chr4_5	YDR226W	ADK1
YIL044C::chr9_1	YIL044C	AGE2
YLR109W::chr12_2	YLR109W	AHP1
YBR108W::chr2_3	YBR108W	AIM3
YHR199C::chr8_3	YHR199C	AIM46
YMR092C::chr00_6	YMR092C	AIP1
YDR264C::chr4_6	YDR264C	AKR1
YMR169C::chr00_4	YMR169C	ALD3
YNL148C::chr14_2	YNL148C	ALF1
YKR021W::chr11_3	YKR021W	ALY1
YML035C::chr00_14	YML035C	AMD1
YJR047C::chr00_13	YJR047C	ANB1
YEL036C::chr5_2	YEL036C	ANP1
YLR102C::chr12_2	YLR102C	APC9
YKL135C::chr11_2	YKL135C	APL2
YPL195W::chr16_1	YPL195W	APL5
YIL040W::chr9_1	YIL040W	APQ12
YJL075C::chr10_2	YJL075C	APQ13
YLR170C::chr12_3	YLR170C	APS1
YBR149W::chr2_3	YBR149W	ARA1
YLR370C::chr00_11	YLR370C	ARC18
YDR127W::chr4_4	YDR127W	ARO1
YBR249C::chr2_4	YBR249C	ARO4
YPR060C::chr16_4	YPR060C	ARO7
YGL202W::chr7_3	YGL202W	ARO8
YNL059C::chr00_18	YNL059C	ARP5
YLR242C::chr12_4	YLR242C	ARV1
YMR116C::chr00_9	YMR116C	ASC1
YJL115W::chr10_2	YJL115W	ASF1
YLR393W::chr12_5	YLR393W	ATP10
YNL315C::chr00_17b	YNL315C	ATP11
YNL315C::chr00_18	YNL315C	ATP11
YJL180C::chr10_1	YJL180C	ATP12
YPL271W::chr16_1	YPL271W	ATP15
YDR377W::chr4_7	YDR377W	ATP17
YDR350C::chr4_7	YDR350C	ATP22
YMR098C::chr00_9	YMR098C	ATP25
YLR114C::chr12_2	YLR114C	AVL9
YMR068W::chr00_6	YMR068W	AVO2
YJL095W::chr10_2	YJL095W	BCK1
YDR375C::chr4_7	YDR375C	BCS1
YIL033C::chr00_17b	YIL033C	BCY1
YLR399C::chr12_5	YLR399C	BDF1
YER155C::chr00_5	YER155C	BEM2
YFL006W::chr6_1	YFL007W	BLM10
YER177W::chr00_5	YER177W	BMH1
YGR230W::chr00_2	YGR230W	BNS1
YPL084W::chr16_3	YPL084W	BRO1
YDR275W::chr4_6	YDR275W	BSC2
YOL137W::chr00_6	YOL137W	BSC6
YPL069C::chr16_3	YPL069C	BTS1
YDR252W::chr4_6	YDR252W	BTT1
YGR188C::chr00_10	YGR188C	BUB1
YOR026W::chr15_1	YOR026W	BUB3
YEL029C::chr5_2	YEL029C	BUD16
YJL188C::chr10_1	YJL188C	BUD19
YCR047C::chr00_16a	YCR047C	BUD23
YER014C-A::chr5_3	YER014C-A	BUD25
YFL023W::chr6_1	YFL023W	BUD27
YLR062C::chr12_2	YLR062C	BUD28
YDL151C::chr4_2	YDL151C	BUD30
YCR063W::chr00_1	YCR063W	BUD31
YGR262C::chr00_3	YGR262C	BUD32
YLR226W::chr12_3	YLR226W	BUR2
YKR036C::chr00_14	YKR036C	CAF4
YPL048W::chr16_3	YPL048W	CAM1
YOR125C::chr15_2	YOR125C	CAT5
YPL215W::chr16_1	YPL215W	CBP3
YDR270W::chr4_6	YDR270W	CCC2
YAL021C::chr1_1	YAL021C	CCR4
YBR131W::chr00_16a	YBR131W	CCZ1
YGL206C::chr7_3	YGL206C	CHC1
YBR274W::chr00_1	YBR274W	CHK1
YPL008W::chr16_3	YPL008W	CHL1
YBR038W::chr2_2	YBR038W	CHS2
YLR330W::chr12_5	YLR330W	CHS5
YMR198W::chr00_11	YMR198W	CIK1
YPR001W::chr16_3	YPR001W	CIT3
YGL019W::chr7_1	YGL019W	CKB1
YNL298W::chr14_1	YNL298W	CLA4
YGR167W::chr7_5	YGR167W	CLC1
YAL040C::chr1_1	YAL040C	CLN3
YFR014C::chr6_1	YFR014C	CMK1
YKL190W::chr11_2	YKL190W	CNB1
YNL225C::chr14_2	YNL225C	CNM67
YIL157C::chr9_2	YIL157C	COA1
YLR218C::chr12_3	YLR218C	COA4
YGL223C::chr7_3	YGL223C	COG1
YOL096C::chr00_6	YOL096C	COQ3
YGR255C::chr00_17a	YGR255C	COQ6
YBL045C::chr2_1	YBL045C	COR1
YPL172C::chr16_2	YPL172C	COX10
YER141W::chr00_5	YER141W	COX15
YDR231C::chr4_5	YDR231C	COX20
YNL052W::chr00_16b	YNL052W	COX5A
YMR256C::chr13_5	YMR256C	COX7
YNL130C::chr00_16b	YNL130C	CPT1
YLR087C::chr12_2	YLR087C	CSF1
YMR025W::chr13_2	YMR025W	CSI1
YMR048W::chr00_11	YMR048W	CSM3
YMR078C::chr00_6	YMR078C	CTF18
YPR135W::chr16_5	YPR135W	CTF4
YHR191C::chr00_8	YHR191C	CTF8
YKL139W::chr00_14	YKL139W	CTK1
YJL006C::chr00_13	YJL006C	CTK2
YML112W::chr00_9	YML112W	CTK3
YBR291C::chr00_1	YBR291C	CTP1
YPR124W::chr16_5	YPR124W	CTR1
YJR048W::chr00_13	YJR048W	CYC1
YAL039C::chr1_1	YAL039C	CYC3
YBR112C::chr00_16a	YBR112C	CYC8
YGR155W::chr00_11	YGR155W	CYS4
YIR027C::chr00_3	YIR027C	DAL1
YLR128W::chr12_3	YLR128W	DCN1
YER143W::chr00_5	YER143W	DDI1
YKL054C::chr11_1	YKL054C	DEF1
YFL001W::chr00_17a	YFL001W	DEG1
YBR201W::chr2_4	YBR201W	DER1
YIL049W::chr9_1	YIL049W	DFG10
YOR030W::chr15_1	YOR030W	DFG16
YOR311C::chr15_4	YOR311C	DGK1
YDL160C::chr4_2	YDL160C	DHH1
YOR080W::chr15_1	YOR080W	DIA2
YHR011W::chr8_1	YHR011W	DIA4
YPL049C::chr16_3	YPL049C	DIG1
YDR263C::chr4_6	YDR263C	DIN7
YJL065C::chr10_2	YJL065C	DLS1
YMR126C::chr00_9	YMR126C	DLT1
YDR069C::chr4_4	YDR069C	DOA4
YGL240W::chr7_3	YGL240W	DOC1
YKL191W::chr11_3	YKL191W	DPH2
YDR284C::chr4_6	YDR284C	DPP1
YGL196W::chr7_3	YGL196W	DSD1
YHR143W::chr8_3	YHR143W	DSE2
YDR359C::chr4_7	YDR359C	EAF1
YKL204W::chr00_14	YKL204W	EAP1
YHL030W::chr8_1	YHL030W	ECM29
YLR436C::chr00_4	YLR436C	ECM30
YER176W::chr00_5	YER176W	ECM32
YLR443W::chr00_4	YLR443W	ECM7
YBL047C::chr2_1	YBL047C	EDE1
YGR272C::chr00_17a	YGR271C-A	EFG1
YPL046C::chr16_3	YPL046C	ELC1
YKL160W::chr11_2	YKL160W	ELF1
YGL200C::chr7_3	YGL200C	EMP24
YLR083C::chr12_2	YLR083C	EMP70
YNL084C::chr14_3	YNL084C	END3
YMR202W::chr13_4	YMR202W	ERG2
YNL280C::chr14_1	YNL280C	ERG24
YLR056W::chr12_2	YLR056W	ERG3
YGL012W::chr7_1	YGL012W	ERG4
YDR261C::chr4_6	YDR261C	EXG2
YFR019W::chr00_15	YFR019W	FAB1
YNL127W::chr14_3	YNL127W	FAR11
YKR016W::chr11_3	YKR016W	FCJ1
YOR383C::chr15_4	YOR383C	FIT3
YHR176W::chr8_3	YHR176W	FMO1
YJL161W::chr00_14	YJL161W	FMP33
YBL042C::chr2_1	YBL042C	FUI1
YAL035W::chr1_1	YAL035W	FUN12
YNL133C::chr14_3	YNL133C	FYV6
YBR179C::chr2_4	YBR179C	FZO1
YGL195W::chr7_3	YGL195W	GCN1
YDR283C::chr4_6	YDR283C	GCN2
YGR252W::chr00_17a	YGR252W	GCN5
YBR187W::chr2_4	YBR187W	GDT1
YGL020C::chr7_1	YGL020C	GET1
YER054C::chr5_3	YER054C	GIP2
YML006C::chr13_2	YML006C	GIS4
YER107C::chr00_5	YER107C	GLE2
YDR272W::chr4_6	YDR272W	GLO2
YPL091W::chr16_3	YPL091W	GLR1
YHR183W::chr8_3	YHR183W	GND1
YJL184W::chr00_14	YJL184W	GON7
YJR090C::chr00_12	YJR090C	GRR1
YPL059W::chr16_3	YPL059W	GRX5
YJL101C::chr00_15	YJL101C	GSH1
YPR005C::chr16_3	YPR005C	HAL1
YJL165C::chr00_14	YJL165C	HAL5
YGL237C::chr7_3	YGL237C	HAP2
YKR084C::chr00_3	YKR084C	HBS1
YPR179C::chr16_5	YPR179C	HDA3
YBL032W::chr2_1	YBL032W	HEK2
YER014W::chr5_2	YER014W	HEM14
YBL008W::chr2_1	YBL008W	HIR1
YOR038C::chr15_1	YOR038C	HIR2
YJR055W::chr00_17b	YJR055W	HIT1
YJR055W::chr00_13	YJR055W	HIT1
YDR420W::chr4_7	YDR420W	HKR1
YMR032W::chr13_2	YMR032W	HOF1
YLR113W::chr12_2	YLR113W	HOG1
YDR158W::chr4_5	YDR158W	HOM2
YJR139C::chr00_12	YJR139C	HOM6
YBR215W::chr2_4	YBR215W	HPC2
YDR138W::chr4_4	YDR138W	HPR1
YKL101W::chr11_2	YKL101W	HSL1
YBR133C::chr2_3	YBR133C	HSL7
YDR258C::chr4_6	YDR258C	HSP78
YBL003C::chr2_1	YBL003C	HTA2
YOL012C::chr15_5	YOL012C	HTZ1
YER039C::chr5_3	YER039C	HVG1
YNR072W::chr00_6	YNR072W	HXT17
YPL250C::chr16_1	YPL250C	ICY2
YOR136W::chr15_2	YOR136W	IDH2
YLR174W::chr12_3	YLR174W	IDP2
YNL009W::chr14_4	YNL009W	IDP3
YNL215W::chr14_2	YNL215W	IES2
YER092W::chr00_8	YER092W	IES5
YEL044W::chr5_2	YEL044W	IES6
YBR159W::chr2_3	YBR159W	IFA38
YCR071C::chr00_1	YCR071C	IMG2
YMR150C::chr13_4	YMR150C	IMP1
YIL154C::chr9_2	YIL154C	IMP2'
YMR044W::chr13_2	YMR044W	IOC4
YDR315C::chr4_6	YDR315C	IPK1
YPL017C::chr00_17b	YPL017C	IRC15
YIR036C::chr00_3	YIR036C	IRC24
YDR332W::chr4_6	YDR332W	IRC3
YHR079C::chr8_2	YHR079C	IRE1
YLL027W::chr12_1	YLL027W	ISA1
YBR086C::chr2_3	YBR086C	IST2
YOL101C::chr00_6	YOL101C	IZH4
YNL227C::chr14_2	YNL227C	JJJ1
YBR017C::chr2_2	YBR017C	KAP104
YGL241W::chr7_3	YGL241W	KAP114
YPL125W::chr16_2	YPL125W	KAP120
YNL322C::chr14_1	YNL322C	KRE1
YDR532C::chr4_8	YDR532C	KRE28
YPR159W::chr16_5	YPR159W	KRE6
YPL053C::chr16_3	YPL053C	KTR6
YOR123C::chr15_2	YOR123C	LEO1
YOR108W::chr15_2	YOR108W	LEU9
YPL055C::chr16_3	YPL055C	LGE1
YHR156C::chr8_3	YHR156C	LIN1
YGR244C::chr00_2	YGR244C	LSC2
YPL004C::chr00_17b	YPL004C	LSP1
YAL024C::chr00_17a	YAL024C	LTE1
YKL143W::chr11_2	YKL143W	LTV1
YDR034C::chr4_3	YDR034C	LYS14
YBR299W::chr00_17a	YBR299W	MAL32
YLR244C::chr12_4	YLR244C	MAP1
YOR298C-A::chr00_17b	YOR298C-A	MBF1
YDR318W::chr4_6	YDR318W	MCM21
YAL010C::chr1_1	YAL010C	MDM10
YOL076W::chr15_5	YOL076W	MDM20
YGL219C::chr00_14	YGL219C	MDM34
YGL197W::chr7_3	YGL197W	MDS3
YPR138C::chr16_5	YPR138C	MEP3
YIL128W::chr9_2	YIL128W	MET18
YNL277W::chr14_1	YNL277W	MET2
YOL064C::chr15_5	YOL064C	MET22
YER091C::chr00_8	YER091C	MET6
YOR241W::chr15_3	YOR241W	MET7
YIR033W::chr00_3	YIR033W	MGA2
YEL007W::chr5_2	YEL007W	MIT1
YPL140C::chr16_2	YPL140C	MKK2
YNL117W::chr14_3	YNL117W	MLS1
YHR204W::chr8_3	YHR204W	MNL1
YDR245W::chr4_6	YDR245W	MNN10
YPL050C::chr16_3	YPL050C	MNN9
YHR162W::chr00_8	YHR162W	MPC2
YMR224C::chr13_4	YMR224C	MRE11
YGL064C::chr7_1	YGL064C	MRH4
YKL003C::chr11_1	YKL003C	MRP17
YBL090W::chr2_1	YBL090W	MRP21
YBL038W::chr2_1	YBL038W	MRPL16
YKR085C::chr00_15	YKR085C	MRPL20
YMR193W::chr13_4	YMR193W	MRPL24
YGR076C::chr7_4	YGR076C	MRPL25
YBR282W::chr00_1	YBR282W	MRPL27
YMR024W::chr13_2	YMR024W	MRPL3
YMR286W::chr13_5	YMR286W	MRPL33
YMR225C::chr13_4	YMR225C	MRPL44
YDR237W::chr4_5	YDR237W	MRPL7
YNR036C::chr14_4	YNR036C	MRPS12
YMR158W::chr00_8	YMR158W	MRPS8
YBR146W::chr2_3	YBR146W	MRPS9
YKL009W::chr11_1	YKL009W	MRT4
YHR120W::chr8_2	YHR120W	MSH1
YOL090W::chr00_6	YOL090W	MSH2
YIR009W::chr9_2	YIR009W	MSL1
YDR335W::chr4_6	YDR335W	MSN5
YDR194C::chr4_5	YDR194C	MSS116
YKL194C::chr00_14	YKL194C	MST1
YKL098W::chr11_2	YKL098W	MTC2
YGL226W::chr7_3	YGL226W	MTC3
YBR255W::chr2_4	YBR255W	MTC4
YHR151C::chr8_3	YHR151C	MTC6
YEL033W::chr5_2	YEL033W	MTC7
YMR228W::chr13_4	YMR228W	MTF1
YDR277C::chr4_6	YDR277C	MTH1
YBR119W::chr2_3	YBR119W	MUD1
YPR131C::chr16_5	YPR131C	NAT3
YPL006W::chr16_3	YPL006W	NCR1
YNL119W::chr00_16b	YNL119W	NCS2
YGL211W::chr7_3	YGL211W	NCS6
YDR176W::chr4_5	YDR176W	NGG1
YGL221C::chr7_3	YGL221C	NIF3
YDR383C::chr4_7	YDR383C	NKP1
YLR285W::chr12_4	YLR285W	NNT1
YPR072W::chr16_4	YPR072W	NOT5
YMR091C::chr00_6	YMR091C	NPL6
YNL183C::chr14_2	YNL183C	NPR1
YNL129W::chr14_3	YNL129W	NRK1
YKL057C::chr11_1	YKL057C	NUP120
YHR195W::chr8_3	YHR195W	NVJ1
YPR091C::chr00_18	YPR091C	NVJ2
YPL052W::chr16_3	YPL052W	OAZ1
YGL038C::chr7_1	YGL038C	OCH1
YKL134C::chr11_2	YKL134C	OCT1
YLR338W::chr12_5	YLR338W	OPI9
YBR129C::chr2_3	YBR129C	OPY1
YDL232W::chr4_3	YDL232W	OST4
YGL226C-A::chr7_3	YGL226C-A	OST5
YLR054C::chr12_2	YLR054C	OSW2
YFL044C::chr6_1	YFL044C	OTU1
YHR179W::chr8_3	YHR179W	OYE2
YBR279W::chr00_1	YBR279W	PAF1
YMR165C::chr13_4	YMR165C	PAH1
YJL128C::chr00_15	YJL128C	PBS2
YLR151C::chr12_3	YLR151C	PCD1
YGL248W::chr7_3	YGL248W	PDE1
YPR002W::chr16_3	YPR002W	PDH1
YOR153W::chr15_2	YOR153W	PDR5
YOR036W::chr15_1	YOR036W	PEP12
YLR148W::chr12_3	YLR148W	PEP3
YDR323C::chr4_6	YDR323C	PEP7
YDR079W::chr4_4	YDR079W	PET100
YBL080C::chr2_1	YBL080C	PET112
YER153C::chr00_5	YER153C	PET122
YJR034W::chr00_13	YJR034W	PET191
YNL003C::chr14_4	YNL003C	PET8
YOL044W::chr15_5	YOL044W	PEX15
YHR160C::chr8_3	YHR160C	PEX18
YGR239C::chr00_14	YGR239C	PEX21
YHR150W::chr8_3	YHR150W	PEX28
YBR168W::chr00_16a	YBR168W	PEX32
YGR240C::chr00_2	YGR240C	PFK1
YMR205C::chr13_4	YMR205C	PFK2
YOL136C::chr00_6	YOL136C	PFK27
YHR185C::chr00_10	YHR185C	PFS1
YPL206C::chr16_1	YPL206C	PGC1
YMR105C::chr00_9	YMR105C	PGM2
YPL031C::chr16_3	YPL031C	PHO85
YDR313C::chr4_6	YDR313C	PIB1
YOR104W::chr15_2	YOR104W	PIN2
YPR154W::chr16_5	YPR154W	PIN3
YOL100W::chr00_6	YOL100W	PKH2
YPL268W::chr00_15	YPL268W	PLC1
YDR276C::chr4_6	YDR276C	PMP3
YIL122W::chr9_2	YIL122W	POG1
YLL023C::chr12_1	YLL023C	POM33
YDR435C::chr4_7	YDR435C	PPM1
YMR297W::chr13_5	YMR297W	PRC1
YGR006W::chr7_3	YGR006W	PRP18
YHL011C::chr00_10	YHL011C	PRS3
YBL064C::chr2_1	YBL064C	PRX1
YBL046W::chr2_1	YBL046W	PSY4
YHR189W::chr8_3	YHR189W	PTH1
YNL016W::chr14_4	YNL016W	PUB1
YLR165C::chr12_3	YLR165C	PUS5
YGR183C::chr7_5	YGR183C	QCR9
YML095C::chr00_9	YML095C	RAD10
YBR114W::chr2_3	YBR114W	RAD16
YML032C::chr13_2	YML032C	RAD52
YGL058W::chr7_1	YGL058W	RAD6
YGL246C::chr7_3	YGL246C	RAI1
YDL090C::chr4_1	YDL090C	RAM1
YMR075W::chr00_6	YMR075W	RCO1
YOR380W::chr15_4	YOR380W	RDR1
YHR157W::chr8_3	YHR157W	REC104
YLR059C::chr12_2	YLR059C	REX2
YOL080C::chr15_5	YOL080C	REX4
YLR176C::chr12_3	YLR176C	RFX1
YBL033C::chr2_1	YBL033C	RIB1
YOL143C::chr00_10	YOL143C	RIB4
YMR154C::chr00_10	YMR154C	RIM13
YNL294C::chr14_1	YNL294C	RIM21
YGL045W::chr7_1	YGL045W	RIM8
YMR063W::chr00_6	YMR063W	RIM9
YEL024W::chr5_2	YEL024W	RIP1
YDR257C::chr4_6	YDR257C	RKM4
YPL089C::chr16_3	YPL089C	RLM1
YDL001W::chr4_1	YDL001W	RMD1
YDR255C::chr4_6	YDR255C	RMD5
YFR048W::chr00_2	YFR048W	RMD8
YPL024W::chr16_3	YPL024W	RMI1
YDR279W::chr4_6	YDR279W	RNH202
YLR154C::chr12_3	YLR154C	RNH203
YER070W::chr5_3	YER070W	RNR1
YGR180C::chr7_5	YGR180C	RNR4
YGR070W::chr7_4	YGR070W	ROM1
YPR065W::chr16_4	YPR065W	ROX1
YBL093C::chr2_1	YBL093C	ROX3
YJR063W::chr00_13	YJR063W	RPA12
YNL248C::chr14_1	YNL248C	RPA49
YJL140W::chr00_14	YJL140W	RPB4
YGL070C::chr7_1	YGL070C	RPB9
YGL135W::chr7_2	YGL135W	RPL1B
YBR191W::chr00_11	YBR191W	RPL21A
YPL079W::chr16_3	YPL079W	RPL21B
YLR061W::chr12_2	YLR061W	RPL22A
YDL075W::chr4_1	YDL075W	RPL31A
YJL189W::chr00_14	YJL189W	RPL39
YGL076C::chr7_1	YGL076C	RPL7A
YDR382W::chr4_7	YDR382W	RPP2B
YLR048W::chr12_2	YLR048W	RPS0B
YOR293W::chr15_4	YOR293W	RPS10A
YLR441C::chr00_4	YLR441C	RPS1A
YPR132W::chr16_5	YPR132W	RPS23B
YLR333C::chr12_5	YLR333C	RPS25B
YPL090C::chr16_3	YPL090C	RPS6A
YBR189W::chr00_14	YBR189W	RPS9B
YIL153W::chr9_2	YIL153W	RRD1
YPL152W::chr16_2	YPL152W	RRD2
YOR001W::chr15_1	YOR001W	RRP6
YER066W::chr00_10	YER066W	RRT13
YNL105W::chr00_16b	YNL105W	RRT16
YPL193W::chr16_1	YPL193W	RSA1
YLR221C::chr12_3	YLR221C	RSA3
YLR357W::chr12_5	YLR357W	RSC2
YMR030W::chr13_2	YMR030W	RSF1
YDR175C::chr4_5	YDR175C	RSM24
YNL254C::chr14_1	YNL254C	RTC4
YPL183W-A::chr00_11	YPL183W-A	RTC6
YGL244W::chr7_3	YGL244W	RTF1
YGL252C::chr7_3	YGL252C	RTG2
YGR275W::chr00_3	YGR275W	RTT102
YDR289C::chr4_6	YDR289C	RTT103
YNL206C::chr14_2	YNL206C	RTT106
YLL002W::chr12_1	YLL002W	RTT109
YCR009C::chr3_1	YCR009C	RVS161
YDR388W::chr4_7	YDR388W	RVS167
YKL212W::chr11_3	YKL212W	SAC1
YDR129C::chr4_4	YDR129C	SAC6
YDR389W::chr4_7	YDR389W	SAC7
YHR079C-B::chr00_3	YHR079C-A	SAE3
YBL052C::chr2_1	YBL052C	SAS3
YGR263C::chr00_3	YGR263C	SAY1
YMR272C::chr13_5	YMR272C	SCS7
YKL148C::chr11_2	YKL148C	SDH1
YGL224C::chr7_3	YGL224C	SDT1
YLR268W::chr12_4	YLR268W	SEC22
YGR208W::chr7_5	YGR208W	SER2
YLR403W::chr12_5	YLR403W	SFP1
YOR073W::chr15_1	YOR073W	SGO1
YGL228W::chr7_3	YGL228W	SHE10
YOR035C::chr15_1	YOR035C	SHE4
YBL058W::chr2_1	YBL058W	SHP1
YLR079W::chr12_2	YLR079W	SIC1
YNL236W::chr14_2	YNL236W	SIN4
YDR422C::chr4_7	YDR422C	SIP1
YGL208W::chr7_3	YGL208W	SIP2
YJL089W::chr10_2	YJL089W	SIP4
YKR072C::chr00_3	YKR072C	SIS2
YPR189W::chr16_5	YPR189W	SKI3
YBL007C::chr2_1	YBL007C	SLA1
YNL243W::chr14_2	YNL243W	SLA2
YBR156C::chr2_3	YBR156C	SLI15
YNL047C::chr00_18	YNL047C	SLM2
YBR266C::chr2_4	YBR266C	SLM6
YHR030C::chr8_1	YHR030C	SLT2
YDL013W::chr4_1	YDL013W	SLX5
YER116C::chr00_5	YER116C	SLX8
YNL196C::chr14_2	YNL196C	SLZ1
YPL027W::chr00_17b	YPL027W	SMA1
YML066C::chr00_15	YML066C	SMA2
YNR023W::chr14_4	YNR023W	SNF12
YBR289W::chr00_16a	YBR289W	SNF5
YHL025W::chr00_8	YHL025W	SNF6
YPL002C::chr16_3	YPL002C	SNF8
YPR101W::chr16_4	YPR101W	SNT309
YMR016C::chr13_2	YMR016C	SOK2
YCR073W-A::chr00_1	YCR073W-A	SOL2
YHR163W::chr8_3	YHR163W	SOL3
YMR066W::chr00_6	YMR066W	SOV1
YJR010C-A::chr00_13	YJR010C-A	SPC1
YAL047C::chr00_12	YAL047C	SPC72
YHR014W::chr8_1	YHR014W	SPO13
YKR031C::chr11_3	YKR031C	SPO14
YHR153C::chr8_3	YHR153C	SPO16
YOR313C::chr15_4	YOR313C	SPS4
YJL127C::chr10_2	YJL127C	SPT10
YOL148C::chr00_18	YOL148C	SPT20
YKL020C::chr11_1	YKL020C	SPT23
YBR081C::chr2_3	YBR081C	SPT7
YKR091W::chr00_4	YKR091W	SRL3
YLR119W::chr12_2	YLR119W	SRN2
YPR032W::chr16_4	YPR032W	SRO7
YNL138W::chr00_17b	YNL138W	SRV2
YHR066W::chr8_2	YHR066W	SSF1
YPL042C::chr16_3	YPL042C	SSN3
YLR369W::chr12_5	YLR369W	SSQ1
YLR452C::chr00_4	YLR452C	SST2
YHR064C::chr00_8	YHR064C	SSZ1
YHR178W::chr8_3	YHR178W	STB5
YLR150W::chr12_3	YLR150W	STM1
YMR125W::chr00_9	YMR125W	STO1
YDL048C::chr4_1	YDL048C	STP4
YDR126W::chr4_4	YDR126W	SWF1
YAR044W::chr1_1	YAR042W	SWH1
YJL176C::chr10_1	YJL176C	SWI3
YDR260C::chr4_6	YDR260C	SWM1
YLR251W::chr12_4	YLR251W	SYM1
YPL129W::chr16_2	YPL129W	TAF14
YBR150C::chr00_16a	YBR150C	TBS1
YOR086C::chr15_1	YOR086C	TCB1
YBR044C::chr2_2	YBR044C	TCM62
YBR118W::chr2_3	YBR118W	TEF2
YKL081W::chr11_1	YKL081W	TEF4
YNL128W::chr14_3	YNL128W	TEP1
YGR144W::chr7_5	YGR144W	THI4
YNL139C::chr14_3	YNL139C	THO2
YOL072W::chr15_5	YOL072W	THP1
YHR167W::chr8_3	YHR167W	THP2
YHR025W::chr00_10	YHR025W	THR1
YCR053W::chr00_16a	YCR053W	THR4
YPR163C::chr16_5	YPR163C	TIF3
YLR234W::chr12_4	YLR234W	TOP3
YBR162C::chr2_3	YBR162C	TOS1
YAL016W::chr00_12	YAL016W	TPD3
YKL166C::chr11_2	YKL166C	TPK3
YNL079C::chr00_16b	YNL079C	TPM1
YBR126C::chr2_3	YBR126C	TPS1
YJL129C::chr00_14	YJL129C	TRK1
YML005W::chr13_2	YML005W	TRM12
YPL030W::chr16_3	YPL030W	TRM44
YDR354W::chr4_7	YDR354W	TRP4
YCR084C::chr00_16a	YCR084C	TUP1
YBR082C::chr2_3	YBR082C	UBC4
YPL072W::chr16_3	YPL072W	UBP16
YFR010W::chr6_1	YFR010W	UBP6
YBR165W::chr2_3	YBR165W	UBS1
YML013W::chr13_2	YML013W	UBX2
YDR330W::chr4_6	YDR330W	UBX5
YDR470C::chr4_8	YDR470C	UGO1
YPL003W::chr16_3	YPL003W	ULA1
YLR168C::chr12_3	YLR168C	UPS2
YKL216W::chr11_3	YKL216W	URA1
YML106W::chr00_9	YML106W	URA5
YNL054W::chr14_3	YNL054W	VAC7
YEL013W::chr5_2	YEL013W	VAC8
YDL077C::chr4_1	YDL077C	VAM6
YGL212W::chr7_3	YGL212W	VAM7
YDR247W::chr4_6	YDR247W	VHS1
YLR373C::chr12_5	YLR373C	VID22
YHR039C-B::chr00_3	YHR039C-A	VMA10
YPL234C::chr16_1	YPL234C	VMA11
YPR036W::chr16_4	YPR036W	VMA13
YHR026W::chr00_10	YHR026W	VMA16
YBR127C::chr2_3	YBR127C	VMA2
YGR105W::chr7_4	YGR105W	VMA21
YHR060W::chr8_2	YHR060W	VMA22
YKL080W::chr11_1	YKL080W	VMA5
YLR447C::chr00_4	YLR447C	VMA6
YGR020C::chr7_3	YGR020C	VMA7
YEL051W::chr5_2	YEL051W	VMA8
YKL119C::chr11_2	YKL119C	VPH2
YKR001C::chr11_3	YKR001C	VPS1
YBR097W::chr2_3	YBR097W	VPS15
YPL045W::chr16_3	YPL045W	VPS16
YMR077C::chr00_6	YMR077C	VPS20
YKL041W::chr11_1	YKL041W	VPS24
YNR006W::chr14_4	YNR006W	VPS27
YPL065W::chr16_3	YPL065W	VPS28
YLR396C::chr12_5	YLR396C	VPS33
YLR240W::chr12_4	YLR240W	VPS34
YLR417W::chr12_5	YLR417W	VPS36
YPR173C::chr16_5	YPR173C	VPS4
YGL095C::chr7_1	YGL095C	VPS45
YJL029C::chr00_13	YJL029C	VPS53
YDR027C::chr4_3	YDR027C	VPS54
YJR044C::chr00_13	YJR044C	VPS55
YDR200C::chr4_5	YDR200C	VPS64
YLR337C::chr12_5	YLR337C	VRP1
YLR090W::chr12_2	YLR090W	XDJ1
YDR369C::chr4_7	YDR369C	XRS2
YNL107W::chr00_16b	YNL107W	YAF9
YHR161C::chr8_3	YHR161C	YAP1801
YBL012C::chr2_1	YBL012C	YBL012C
YBR113W::chr2_3	YBR113W	YBR113W
YNL154C::chr14_2	YNL154C	YCK2
YCL007C::chr3_1	YCL007C	YCL007C
YCR050C::chr00_1	YCR050C	YCR050C
YCR064C::chr00_16a	YCR064C	YCR064C
YCR087C-A::chr00_1	YCR087C-A	YCR087C-A
YLL055W::chr12_1	YLL055W	YCT1
YNL064C::chr14_3	YNL064C	YDJ1
YDL206W::chr4_3	YDL206W	YDL206W
YDL241W::chr4_3	YDL241W	YDL241W
YDR161W::chr4_5	YDR161W	YDR161W
YDR179W-A::chr4_5	YDR179W-A	YDR179W-A
YDR199W::chr4_5	YDR199W	YDR199W
YDR249C::chr4_6	YDR249C	YDR249C
YDR250C::chr4_6	YDR250C	YDR250C
YDR262W::chr4_6	YDR262W	YDR262W
YDR266C::chr4_6	YDR266C	YDR266C
YDR269C::chr4_6	YDR269C	YDR269C
YDR271C::chr4_6	YDR271C	YDR271C
YDR274C::chr4_6	YDR274C	YDR274C
YDR278C::chr4_6	YDR278C	YDR278C
YDR282C::chr4_6	YDR282C	YDR282C
YDR290W::chr4_6	YDR290W	YDR290W
YDR307W::chr4_6	YDR307W	YDR307W
YDR333C::chr4_6	YDR333C	YDR333C
YDR336W::chr4_6	YDR336W	YDR336W
YDR401W::chr4_7	YDR401W	YDR401W
YDR415C::chr4_7	YDR415C	YDR415C
YDR455C::chr4_8	YDR455C	YDR455C
YDR535C::chr00_2	YDR535C	YDR535C
YEL045C::chr5_2	YEL045C	YEL045C
YER046W-A::chr5_3	YER046W-A	YER046W-A
YER066C-A::chr5_3	YER066C-A	YER066C-A
YFL013W-A::chr00_15	YFL013W-A	YFL013W-A
YGL036W::chr7_1	YGL036W	YGL036W
YGL088W::chr7_1	YGL088W	YGL088W
YGL199C::chr7_3/chr00_12	YGL199C	YGL199C
YGL214W::chr7_3/chr00_12	YGL214W	YGL214W
YGL218W::chr7_3/chr00_12	YGL218W	YGL218W
YGR001C::chr7_3	YGR001C	YGR001C
YGR016W::chr7_3	YGR016W	YGR016W
YGR122W::chr7_4	YGR122W	YGR122W
YGR283C::chr00_3	YGR283C	YGR283C
YGR290W::chr00_3	YGR290W	YGR290W
YJL059W::chr10_2	YJL059W	YHC3
YHR029C::chr8_1	YHR029C	YHI9
YHR080C::chr8_2	YHR080C	YHR080C
YHR180W::chr00_10	YHR180W	YHR180W
YHR182W::chr8_3	YHR182W	YHR182W
YHR210C::chr8_3	YHR210C	YHR210C
YIL025C::chr9_1	YIL025C	YIL025C
YIL058W::chr00_17b	YIL058W	YIL058W
YIL092W::chr00_17b	YIL092W	YIL092W
YGL198W::chr7_3	YGL198W	YIP4
YJL045W::chr10_2	YJL045W	YJL045W
YJR018W::chr00_13	YJR018W	YJR018W
YLR200W::chr12_3	YLR200W	YKE2
YKL027W::chr11_1	YKL027W	YKL027W
YKL069W::chr11_1	YKL069W	YKL069W
YKR073C::chr00_3	YKR073C	YKR073C
YPR125W::chr16_5	YPR125W	YLH47
YLL020C::chr12_1	YLL020C	YLL020C
YLR108C::chr12_2	YLR108C	YLR108C
YLR124W::chr12_2	YLR124W	YLR124W
YLR169W::chr12_3	YLR169W	YLR169W
YLR184W::chr12_3	YLR184W	YLR184W
YLR202C::chr12_3	YLR202C	YLR202C
YLR235C::chr12_4	YLR235C	YLR235C
YLR287C::chr12_4	YLR287C	YLR287C
YLR294C::chr12_4	YLR294C	YLR294C
YLR358C::chr00_11	YLR358C	YLR358C
YLR365W::chr12_5	YLR365W	YLR365W
YLR422W::chr00_4	YLR422W	YLR422W
YMR302C::chr13_5	YMR302C	YME2
YML010W-A::chr13_2	YML009W-B	YML009W-B
YML013C-A::chr13_2	YML012C-A	YML012C-A
YML018C::chr13_2	YML018C	YML018C
YML048W-A::chr13_1b	YML047W-A	YML047W-A
YML058C-A::chr13_1b	YML057C-A	YML057C-A
YML095C-A::chr00_9	YML094C-A	YML094C-A
YML122C::chr00_9	YML122C	YML122C
YMR031W-A::chr13_2	YMR031W-A	YMR031W-A
YMR099C::chr00_9	YMR099C	YMR099C
YMR158C-B::chr00_4	YMR158C-A	YMR158C-A
YMR194C-A::chr00_4	YMR194C-A	YMR194C-A
YMR294W-A::chr13_5	YMR294W-A	YMR294W-A
YNL046W::chr14_4	YNL046W	YNL046W
YNL058C::chr14_3	YNL058C	YNL058C
YNL108C::chr14_3	YNL108C	YNL108C
YNL109W::chr00_18	YNL109W	YNL109W
YNL115C::chr00_16b	YNL115C	YNL115C
YNL140C::chr00_17b	YNL140C	YNL140C
YNL179C::chr14_2	YNL179C	YNL179C
YNL184C::chr14_2	YNL184C	YNL184C
YNL217W::chr14_2	YNL217W	YNL217W
YNL228W::chr14_2	YNL228W	YNL228W
YNR005C::chr14_4	YNR005C	YNR005C
YNR029C::chr14_4	YNR029C	YNR029C
YNR042W::chr14_4	YNR042W	YNR042W
YNR065C::chr00_4	YNR065C	YNR065C
YOR008C-A::chr00_10	YOR008C-A	YOR008C-A
YOR019W::chr15_1	YOR019W	YOR019W
YPL034W::chr00_17b	YPL034W	YPL034W
YPL068C::chr16_3	YPL068C	YPL068C
YPL077C::chr16_3	YPL077C	YPL077C
YPL150W::chr16_2	YPL150W	YPL150W
YPL185W::chr16_2	YPL185W	YPL185W
YPL260W::chr16_1	YPL260W	YPL260W
YPR003C::chr16_3	YPR003C	YPR003C
YPR059C::chr16_4	YPR059C	YPR059C
YDR368W::chr4_7	YDR368W	YPR1
YPR127W::chr16_5	YPR127W	YPR127W
YPR153W::chr16_5	YPR153W	YPR153W
YLR121C::chr12_2	YLR121C	YPS3
YLR262C::chr12_4	YLR262C	YPT6
YMR089C::chr00_6	YMR089C	YTA12
YIR026C::chr00_3	YIR026C	YVH1
YDR285W::chr4_6	YDR285W	ZIP1
YGL249W::chr7_3	YGL249W	ZIP2
YMR243C::chr13_5	YMR243C	ZRC1
YGL255W::chr7_3	YGL255W	ZRT1
YGR285C::chr00_3	YGR285C	ZUO1

## Sheet: flight+NaCl
Strain	ORF	Gene
YNR033W::chr00_18	YNR033W	ABZ1
YLR131C::chr12_3	YLR131C	ACE2
YLR144C::chr12_3	YLR144C	ACF2
YKL206C::chr11_3	YKL206C	ADD66
YNL220W::chr00_18	YNL220W	ADE12
YGL234W::chr7_3	YGL234W	ADE5,7
YDR408C::chr4_7	YDR408C	ADE8
YOL086C::chr00_6	YOL086C	ADH1
YDR226W::chr4_5	YDR226W	ADK1
YJR105W::chr10_4	YJR105W	ADO1
YLR227C::chr12_3	YLR227C	ADY4
YGL071W::chr7_1	YGL071W	AFT1
YIL044C::chr9_1	YIL044C	AGE2
YLR109W::chr12_2	YLR109W	AHP1
YBR108W::chr2_3	YBR108W	AIM3
YHR199C::chr8_3	YHR199C	AIM46
YMR092C::chr00_6	YMR092C	AIP1
YDL175C::chr4_2	YDL175C	AIR2
YDR264C::chr4_6	YDR264C	AKR1
YMR169C::chr00_4	YMR169C	ALD3
YPL061W::chr16_3	YPL061W	ALD6
YNL148C::chr14_2	YNL148C	ALF1
YKR021W::chr11_3	YKR021W	ALY1
YML035C::chr00_14	YML035C	AMD1
YJR047C::chr00_13	YJR047C	ANB1
YEL036C::chr5_2	YEL036C	ANP1
YLR102C::chr12_2	YLR102C	APC9
YPL195W::chr16_1	YPL195W	APL5
YBL019W::chr2_1	YBL019W	APN2
YIL040W::chr9_1	YIL040W	APQ12
YJL075C::chr10_2	YJL075C	APQ13
YML022W::chr00_11	YML022W	APT1
YBR149W::chr2_3	YBR149W	ARA1
YLR370C::chr00_11	YLR370C	ARC18
YHR013C::chr8_1	YHR013C	ARD1
YDR173C::chr4_5	YDR173C	ARG82
YBR164C::chr2_3	YBR164C	ARL1
YDR127W::chr4_4	YDR127W	ARO1
YPR060C::chr16_4	YPR060C	ARO7
YGL202W::chr7_3	YGL202W	ARO8
YNL059C::chr00_18	YNL059C	ARP5
YPR200C::chr16_5	YPR200C	ARR2
YLR242C::chr12_4	YLR242C	ARV1
YMR116C::chr00_9	YMR116C	ASC1
YJL115W::chr10_2	YJL115W	ASF1
YBR128C::chr2_3	YBR128C	ATG14
YLR189C::chr12_3	YLR189C	ATG26
YNL315C::chr00_18	YNL315C	ATP11
YJL180C::chr10_1	YJL180C	ATP12
YPL271W::chr16_1	YPL271W	ATP15
YDR377W::chr4_7	YDR377W	ATP17
YDR350C::chr4_7	YDR350C	ATP22
YMR098C::chr00_9	YMR098C	ATP25
YDR298C::chr4_6	YDR298C	ATP5
YOR079C::chr15_1	YOR079C	ATX2
YLR114C::chr12_2	YLR114C	AVL9
YMR068W::chr00_6	YMR068W	AVO2
YJL095W::chr10_2	YJL095W	BCK1
YDR375C::chr4_7	YDR375C	BCS1
YIL033C::chr00_17b	YIL033C	BCY1
YLR399C::chr12_5	YLR399C	BDF1
YBR200W::chr2_4	YBR200W	BEM1
YER155C::chr00_5	YER155C	BEM2
YFL006W::chr6_1	YFL007W	BLM10
YER177W::chr00_5	YER177W	BMH1
YDR428C::chr4_7	YDR428C	BNA7
YGR230W::chr00_2	YGR230W	BNS1
YPL084W::chr16_3	YPL084W	BRO1
YDR275W::chr4_6	YDR275W	BSC2
YOL137W::chr00_6	YOL137W	BSC6
YDR252W::chr4_6	YDR252W	BTT1
YGR188C::chr00_10	YGR188C	BUB1
YEL029C::chr5_2	YEL029C	BUD16
YLR074C::chr12_2	YLR074C	BUD20
YCR047C::chr00_16a	YCR047C	BUD23
YER014C-A::chr5_3	YER014C-A	BUD25
YDR241W::chr4_5	YDR241W	BUD26
YFL023W::chr6_1	YFL023W	BUD27
YLR062C::chr12_2	YLR062C	BUD28
YDL151C::chr4_2	YDL151C	BUD30
YCR063W::chr00_1	YCR063W	BUD31
YGR262C::chr00_3	YGR262C	BUD32
YLR226W::chr12_3	YLR226W	BUR2
YNL278W::chr14_1	YNL278W	CAF120
YKR036C::chr00_14	YKR036C	CAF4
YPL048W::chr16_3	YPL048W	CAM1
YEL063C::chr5_2	YEL063C	CAN1
YOR125C::chr15_2	YOR125C	CAT5
YPL215W::chr16_1	YPL215W	CBP3
YDR270W::chr4_6	YDR270W	CCC2
YBR131W::chr00_16a	YBR131W	CCZ1
YGL206C::chr7_3	YGL206C	CHC1
YBR274W::chr00_1	YBR274W	CHK1
YPL008W::chr16_3	YPL008W	CHL1
YBR038W::chr2_2	YBR038W	CHS2
YLR330W::chr12_5	YLR330W	CHS5
YMR198W::chr00_11	YMR198W	CIK1
YPR001W::chr16_3	YPR001W	CIT3
YGL019W::chr7_1	YGL019W	CKB1
YGR167W::chr7_5	YGR167W	CLC1
YAL040C::chr1_1	YAL040C	CLN3
YFR014C::chr6_1	YFR014C	CMK1
YML057W::chr13_1b	YML057W	CMP2
YKL190W::chr11_2	YKL190W	CNB1
YDR357C::chr4_7	YDR357C	CNL1
YNL225C::chr14_2	YNL225C	CNM67
YIL157C::chr9_2	YIL157C	COA1
YLR218C::chr12_3	YLR218C	COA4
YGL223C::chr7_3	YGL223C	COG1
YOL096C::chr00_6	YOL096C	COQ3
YGR255C::chr00_17a	YGR255C	COQ6
YBL045C::chr2_1	YBL045C	COR1
YPL172C::chr16_2	YPL172C	COX10
YER141W::chr00_5	YER141W	COX15
YGR062C::chr7_4	YGR062C	COX18
YDR231C::chr4_5	YDR231C	COX20
YNL052W::chr00_16b	YNL052W	COX5A
YMR256C::chr13_5	YMR256C	COX7
YDR155C::chr4_5	YDR155C	CPR1
YLR216C::chr12_3	YLR216C	CPR6
YNL130C::chr00_16b	YNL130C	CPT1
YLR429W::chr00_4	YLR429W	CRN1
YOL063C::chr15_5	YOL063C	CRT10
YLR087C::chr12_2	YLR087C	CSF1
YMR025W::chr13_2	YMR025W	CSI1
YMR048W::chr00_11	YMR048W	CSM3
YDR179C::chr4_5	YDR179C	CSN9
YMR078C::chr00_6	YMR078C	CTF18
YPL018W::chr16_3	YPL018W	CTF19
YPR135W::chr16_5	YPR135W	CTF4
YHR191C::chr00_8	YHR191C	CTF8
YKL139W::chr00_14	YKL139W	CTK1
YJL006C::chr00_13	YJL006C	CTK2
YML112W::chr00_9	YML112W	CTK3
YBR291C::chr00_1	YBR291C	CTP1
YPR124W::chr16_5	YPR124W	CTR1
YPL064C::chr16_3	YPL064C	CWC27
YJR048W::chr00_13	YJR048W	CYC1
YAL039C::chr1_1	YAL039C	CYC3
YBR112C::chr00_16a	YBR112C	CYC8
YGR155W::chr00_11	YGR155W	CYS4
YIR027C::chr00_3	YIR027C	DAL1
YHR028C::chr8_1	YHR028C	DAP2
YGR092W::chr00_14	YGR092W	DBF2
YLR128W::chr12_3	YLR128W	DCN1
YER143W::chr00_5	YER143W	DDI1
YKL054C::chr11_1	YKL054C	DEF1
YFL001W::chr00_17a	YFL001W	DEG1
YBR201W::chr2_4	YBR201W	DER1
YIL049W::chr9_1	YIL049W	DFG10
YOR030W::chr15_1	YOR030W	DFG16
YOR311C::chr15_4	YOR311C	DGK1
YOR080W::chr15_1	YOR080W	DIA2
YHR011W::chr8_1	YHR011W	DIA4
YKL002W::chr11_1	YKL002W	DID4
YPL049C::chr16_3	YPL049C	DIG1
YDR263C::chr4_6	YDR263C	DIN7
YJL065C::chr10_2	YJL065C	DLS1
YMR126C::chr00_9	YMR126C	DLT1
YKL213C::chr11_3	YKL213C	DOA1
YDR069C::chr4_4	YDR069C	DOA4
YGL240W::chr7_3	YGL240W	DOC1
YKL191W::chr11_3	YKL191W	DPH2
YLR172C::chr12_3	YLR172C	DPH5
YDR284C::chr4_6	YDR284C	DPP1
YGL196W::chr7_3	YGL196W	DSD1
YHR143W::chr8_3	YHR143W	DSE2
YKR054C::chr11_3	YKR054C	DYN1
YDR359C::chr4_7	YDR359C	EAF1
YKL204W::chr00_14	YKL204W	EAP1
YLR436C::chr00_4	YLR436C	ECM30
YER176W::chr00_5	YER176W	ECM32
YLR443W::chr00_4	YLR443W	ECM7
YBL047C::chr2_1	YBL047C	EDE1
YGR272C::chr00_17a	YGR271C-A	EFG1
YPL046C::chr16_3	YPL046C	ELC1
YKL160W::chr11_2	YKL160W	ELF1
YKL048C::chr11_1	YKL048C	ELM1
YGL200C::chr7_3	YGL200C	EMP24
YLR080W::chr12_2	YLR080W	EMP46
YLR083C::chr12_2	YLR083C	EMP70
YLR065C::chr12_2	YLR065C	ENV10
YPL236C::chr16_1	YPL236C	ENV7
YMR202W::chr13_4	YMR202W	ERG2
YNL280C::chr14_1	YNL280C	ERG24
YER044C::chr5_3	YER044C	ERG28
YLR056W::chr12_2	YLR056W	ERG3
YGL012W::chr7_1	YGL012W	ERG4
YML012W::chr13_2	YML012W	ERV25
YDR363W::chr4_7	YDR363W	ESC2
YFR019W::chr00_15	YFR019W	FAB1
YNL127W::chr14_3	YNL127W	FAR11
YKR016W::chr11_3	YKR016W	FCJ1
YER056C::chr5_3	YER056C	FCY2
YOR383C::chr15_4	YOR383C	FIT3
YAR050W::chr00_12	YAR050W	FLO1
YIL134W::chr9_2	YIL134W	FLX1
YHR176W::chr8_3	YHR176W	FMO1
YJL161W::chr00_14	YJL161W	FMP33
YNR060W::chr00_4	YNR060W	FRE4
YBL042C::chr2_1	YBL042C	FUI1
YAL035W::chr1_1	YAL035W	FUN12
YCL058C::chr00_12	YCL058C	FYV5
YNL133C::chr14_3	YNL133C	FYV6
YLR068W::chr12_2	YLR068W	FYV7
YBR179C::chr2_4	YBR179C	FZO1
YBR020W::chr00_18	YBR020W	GAL1
YBR020W::chr2_2	YBR020W	GAL1
YLR081W::chr12_2	YLR081W	GAL2
YGL195W::chr7_3	YGL195W	GCN1
YBR187W::chr2_4	YBR187W	GDT1
YGL020C::chr7_1	YGL020C	GET1
YDR358W::chr4_7	YDR358W	GGA1
YML094W::chr00_9	YML094W	GIM5
YER054C::chr5_3	YER054C	GIP2
YML006C::chr13_2	YML006C	GIS4
YER107C::chr00_5	YER107C	GLE2
YDR272W::chr4_6	YDR272W	GLO2
YPL091W::chr16_3	YPL091W	GLR1
YHR183W::chr8_3	YHR183W	GND1
YJL184W::chr00_14	YJL184W	GON7
YJR090C::chr00_12	YJR090C	GRR1
YPL059W::chr16_3	YPL059W	GRX5
YLR364W::chr12_5	YLR364W	GRX8
YPL189W::chr00_11	YPL189W	GUP2
YHL032C::chr8_1	YHL032C	GUT1
YPR005C::chr16_3	YPR005C	HAL1
YJL165C::chr00_14	YJL165C	HAL5
YGL237C::chr7_3	YGL237C	HAP2
YBL021C::chr2_1	YBL021C	HAP3
YOR358W::chr15_4	YOR358W	HAP5
YKR084C::chr00_3	YKR084C	HBS1
YPR179C::chr16_5	YPR179C	HDA3
YBL032W::chr2_1	YBL032W	HEK2
YER014W::chr5_2	YER014W	HEM14
YBL008W::chr2_1	YBL008W	HIR1
YOR038C::chr15_1	YOR038C	HIR2
YJR140C::chr00_12	YJR140C	HIR3
YFR025C::chr00_15	YFR025C	HIS2
YJR055W::chr00_13	YJR055W	HIT1
YJR055W::chr00_17b	YJR055W	HIT1
YDR420W::chr4_7	YDR420W	HKR1
YDR305C::chr4_6	YDR305C	HNT2
YMR032W::chr13_2	YMR032W	HOF1
YLR113W::chr12_2	YLR113W	HOG1
YDR158W::chr4_5	YDR158W	HOM2
YJR139C::chr00_12	YJR139C	HOM6
YBR215W::chr2_4	YBR215W	HPC2
YOL155C::chr00_17b	YOL155C	HPF1
YDR138W::chr4_4	YDR138W	HPR1
YDR399W::chr4_7	YDR399W	HPT1
YKL101W::chr11_2	YKL101W	HSL1
YBR133C::chr2_3	YBR133C	HSL7
YDR258C::chr4_6	YDR258C	HSP78
YBL003C::chr2_1	YBL003C	HTA2
YBL002W::chr2_1	YBL002W	HTB2
YOL012C::chr15_5	YOL012C	HTZ1
YER039C::chr5_3	YER039C	HVG1
YNR072W::chr00_6	YNR072W	HXT17
YDR345C::chr4_7	YDR345C	HXT3
YJL214W::chr10_1	YJL214W	HXT8
YPL250C::chr16_1	YPL250C	ICY2
YOR136W::chr15_2	YOR136W	IDH2
YLR174W::chr12_3	YLR174W	IDP2
YNL009W::chr14_4	YNL009W	IDP3
YFL013C::chr00_17a	YFL013C	IES1
YNL215W::chr14_2	YNL215W	IES2
YER092W::chr00_8	YER092W	IES5
YEL044W::chr5_2	YEL044W	IES6
YBR159W::chr2_3	YBR159W	IFA38
YER086W::chr5_3	YER086W	ILV1
YCR071C::chr00_1	YCR071C	IMG2
YMR150C::chr13_4	YMR150C	IMP1
YIL154C::chr9_2	YIL154C	IMP2'
YLR095C::chr12_2	YLR095C	IOC2
YMR044W::chr13_2	YMR044W	IOC4
YDR315C::chr4_6	YDR315C	IPK1
YPL017C::chr00_17b	YPL017C	IRC15
YIR036C::chr00_3	YIR036C	IRC24
YDR332W::chr4_6	YDR332W	IRC3
YKR019C::chr00_14	YKR019C	IRS4
YLL027W::chr12_1	YLL027W	ISA1
YBR086C::chr2_3	YBR086C	IST2
YOL101C::chr00_6	YOL101C	IZH4
YNL227C::chr14_2	YNL227C	JJJ1
YBR017C::chr2_2	YBR017C	KAP104
YGL241W::chr7_3	YGL241W	KAP114
YMR065W::chr00_6	YMR065W	KAR5
YLR096W::chr12_2	YLR096W	KIN2
YDR532C::chr4_8	YDR532C	KRE28
YPL053C::chr16_3	YPL053C	KTR6
YLR104W::chr12_2	YLR104W	LCL2
YBL006C::chr2_1	YBL006C	LDB7
YPL213W::chr16_1	YPL213W	LEA1
YOR123C::chr15_2	YOR123C	LEO1
YPL055C::chr16_3	YPL055C	LGE1
YHR156C::chr8_3	YHR156C	LIN1
YHR081W::chr8_2	YHR081W	LRP1
YCL034W::chr3_1	YCL034W	LSB5
YGR244C::chr00_2	YGR244C	LSC2
YPL004C::chr00_17b	YPL004C	LSP1
YAL024C::chr00_17a	YAL024C	LTE1
YKL143W::chr11_2	YKL143W	LTV1
YDR034C::chr4_3	YDR034C	LYS14
YJL013C::chr00_13	YJL013C	MAD3
YER142C::chr00_5	YER142C	MAG1
YBR299W::chr00_17a	YBR299W	MAL32
YLR244C::chr12_4	YLR244C	MAP1
YOR298C-A::chr00_11	YOR298C-A	MBF1
YOR298C-A::chr00_17b	YOR298C-A	MBF1
YDR318W::chr4_6	YDR318W	MCM21
YAL010C::chr1_1	YAL010C	MDM10
YOL009C::chr15_5	YOL009C	MDM12
YOL076W::chr15_5	YOL076W	MDM20
YGL219C::chr00_14	YGL219C	MDM34
YGL197W::chr7_3	YGL197W	MDS3
YKR007W::chr11_3	YKR007W	MEH1
YPR138C::chr16_5	YPR138C	MEP3
YFR030W::chr00_15	YFR030W	MET10
YPL023C::chr16_3	YPL023C	MET12
YIL128W::chr9_2	YIL128W	MET18
YNL277W::chr14_1	YNL277W	MET2
YOL064C::chr15_5	YOL064C	MET22
YPL038W::chr16_3	YPL038W	MET31
YER091C::chr00_8	YER091C	MET6
YOR241W::chr15_3	YOR241W	MET7
YPL060W::chr16_3	YPL060W	MFM1
YIR033W::chr00_3	YIR033W	MGA2
YNL291C::chr14_1	YNL291C	MID1
YEL007W::chr5_2	YEL007W	MIT1
YPL140C::chr16_2	YPL140C	MKK2
YNL085W::chr00_16b	YNL085W	MKT1
YNL117W::chr14_3	YNL117W	MLS1
YLR320W::chr12_4	YLR320W	MMS22
YBR098W::chr2_3	YBR098W	MMS4
YIR025W::chr00_3	YIR025W	MND2
YHR204W::chr8_3	YHR204W	MNL1
YLR057W::chr12_2	YLR057W	MNL2
YDR245W::chr4_6	YDR245W	MNN10
YKL200C::chr11_3	YKL201C	MNN4
YPL050C::chr16_3	YPL050C	MNN9
YNL297C::chr14_1	YNL297C	MON2
YER068W::chr5_3	YER068W	MOT2
YHR162W::chr00_8	YHR162W	MPC2
YNR024W::chr14_4	YNR024W	MPP6
YMR224C::chr13_4	YMR224C	MRE11
YGL064C::chr7_1	YGL064C	MRH4
YPR118W::chr00_18	YPR118W	MRI1
YKL003C::chr11_1	YKL003C	MRP17
YBL090W::chr2_1	YBL090W	MRP21
YBL038W::chr2_1	YBL038W	MRPL16
YKR085C::chr00_15	YKR085C	MRPL20
YMR193W::chr13_4	YMR193W	MRPL24
YGR076C::chr7_4	YGR076C	MRPL25
YBR282W::chr00_1	YBR282W	MRPL27
YMR024W::chr13_2	YMR024W	MRPL3
YMR286W::chr13_5	YMR286W	MRPL33
YMR225C::chr13_4	YMR225C	MRPL44
YDR237W::chr4_5	YDR237W	MRPL7
YNR036C::chr14_4	YNR036C	MRPS12
YDR337W::chr4_6	YDR337W	MRPS28
YMR158W::chr00_8	YMR158W	MRPS8
YBR146W::chr2_3	YBR146W	MRPS9
YKL009W::chr11_1	YKL009W	MRT4
YHR120W::chr8_2	YHR120W	MSH1
YIR009W::chr9_2	YIR009W	MSL1
YDR335W::chr4_6	YDR335W	MSN5
YDR194C::chr4_5	YDR194C	MSS116
YKL194C::chr00_14	YKL194C	MST1
YDR268W::chr4_6	YDR268W	MSW1
YKL098W::chr11_2	YKL098W	MTC2
YGL226W::chr7_3	YGL226W	MTC3
YBR255W::chr2_4	YBR255W	MTC4
YHR151C::chr8_3	YHR151C	MTC6
YEL033W::chr5_2	YEL033W	MTC7
YMR228W::chr13_4	YMR228W	MTF1
YDR277C::chr4_6	YDR277C	MTH1
YBR119W::chr2_3	YBR119W	MUD1
YPR131C::chr16_5	YPR131C	NAT3
YPR149W::chr16_5	YPR149W	NCE102
YPL006W::chr16_3	YPL006W	NCR1
YGL211W::chr7_3	YGL211W	NCS6
YDR176W::chr4_5	YDR176W	NGG1
YDR456W::chr4_8	YDR456W	NHX1
YGL221C::chr7_3	YGL221C	NIF3
YDR383C::chr4_7	YDR383C	NKP1
YLR285W::chr12_4	YLR285W	NNT1
YDL213C::chr4_3	YDL213C	NOP6
YIL038C::chr9_1	YIL038C	NOT3
YPR072W::chr16_4	YPR072W	NOT5
YMR091C::chr00_6	YMR091C	NPL6
YNL183C::chr14_2	YNL183C	NPR1
YGR159C::chr7_5	YGR159C	NSR1
YNL091W::chr00_16b	YNL091W	NST1
YPR031W::chr00_15	YPR031W	NTO1
YKL057C::chr11_1	YKL057C	NUP120
YGL151W::chr7_2	YGL151W	NUT1
YHR195W::chr8_3	YHR195W	NVJ1
YKL120W::chr11_2	YKL120W	OAC1
YPL052W::chr16_3	YPL052W	OAZ1
YNL056W::chr00_16b	YNL056W	OCA2
YHL029C::chr8_1	YHL029C	OCA5
YGL038C::chr7_1	YGL038C	OCH1
YDR316W::chr4_6	YDR316W	OMS1
YKR035C::chr11_3	YKR035C	OPI8
YLR338W::chr12_5	YLR338W	OPI9
YBR129C::chr2_3	YBR129C	OPY1
YDL232W::chr4_3	YDL232W	OST4
YLR054C::chr12_2	YLR054C	OSW2
YFL044C::chr6_1	YFL044C	OTU1
YHR179W::chr8_3	YHR179W	OYE2
YOR269W::chr00_17b	YOR269W	PAC1
YBR279W::chr00_1	YBR279W	PAF1
YMR165C::chr13_4	YMR165C	PAH1
YMR174C::chr00_4	YMR174C	PAI3
YDR348C::chr4_7	YDR348C	PAL1
YJL128C::chr00_15	YJL128C	PBS2
YGL248W::chr7_3	YGL248W	PDE1
YPR002W::chr16_3	YPR002W	PDH1
YOR153W::chr15_2	YOR153W	PDR5
YOR036W::chr15_1	YOR036W	PEP12
YLR148W::chr12_3	YLR148W	PEP3
YDR323C::chr4_6	YDR323C	PEP7
YLR064W::chr12_2	YLR064W	PER33
YDR079W::chr4_4	YDR079W	PET100
YBL080C::chr2_1	YBL080C	PET112
YER153C::chr00_5	YER153C	PET122
YJR034W::chr00_13	YJR034W	PET191
YNL003C::chr14_4	YNL003C	PET8
YDR265W::chr4_6	YDR265W	PEX10
YMR026C::chr13_2	YMR026C	PEX12
YOL044W::chr15_5	YOL044W	PEX15
YHR160C::chr8_3	YHR160C	PEX18
YHR150W::chr8_3	YHR150W	PEX28
YBR168W::chr00_16a	YBR168W	PEX32
YGR240C::chr00_2	YGR240C	PFK1
YMR205C::chr13_4	YMR205C	PFK2
YOL136C::chr00_6	YOL136C	PFK27
YHR185C::chr00_10	YHR185C	PFS1
YPL206C::chr16_1	YPL206C	PGC1
YGR233C::chr00_2	YGR233C	PHO81
YPL031C::chr16_3	YPL031C	PHO85
YJL198W::chr10_1	YJL198W	PHO90
YDR313C::chr4_6	YDR313C	PIB1
YBL022C::chr2_1	YBL022C	PIM1
YOR104W::chr15_2	YOR104W	PIN2
YPR154W::chr16_5	YPR154W	PIN3
YBL051C::chr2_1	YBL051C	PIN4
YPL268W::chr00_15	YPL268W	PLC1
YDR276C::chr4_6	YDR276C	PMP3
YNL082W::chr00_16b	YNL082W	PMS1
YPL144W::chr16_2	YPL144W	POC4
YIL122W::chr9_2	YIL122W	POG1
YLL023C::chr12_1	YLL023C	POM33
YNR052C::chr00_15	YNR052C	POP2
YPL188W::chr16_1	YPL188W	POS5
YIL160C::chr9_2	YIL160C	POT1
YDR435C::chr4_7	YDR435C	PPM1
YMR297W::chr13_5	YMR297W	PRC1
YGR006W::chr7_3	YGR006W	PRP18
YHL011C::chr00_10	YHL011C	PRS3
YBL064C::chr2_1	YBL064C	PRX1
YBL046W::chr2_1	YBL046W	PSY4
YBL056W::chr2_1	YBL056W	PTC3
YHR189W::chr8_3	YHR189W	PTH1
YNL016W::chr14_4	YNL016W	PUB1
YGR183C::chr7_5	YGR183C	QCR9
YML095C::chr00_9	YML095C	RAD10
YBR114W::chr2_3	YBR114W	RAD16
YJR035W::chr00_13	YJR035W	RAD26
YML032C::chr13_2	YML032C	RAD52
YGL058W::chr7_1	YGL058W	RAD6
YGL246C::chr7_3	YGL246C	RAI1
YDL090C::chr4_1	YDL090C	RAM1
YOR101W::chr15_2	YOR101W	RAS1
YOR265W::chr00_17b	YOR265W	RBL2
YMR075W::chr00_6	YMR075W	RCO1
YJL204C::chr10_1	YJL204C	RCY1
YHR157W::chr8_3	YHR157W	REC104
YLR059C::chr12_2	YLR059C	REX2
YOL080C::chr15_5	YOL080C	REX4
YLR176C::chr12_3	YLR176C	RFX1
YDR379W::chr4_7	YDR379W	RGA2
YER067W::chr5_3	YER067W	RGI1
YBL033C::chr2_1	YBL033C	RIB1
YOL143C::chr00_10	YOL143C	RIB4
YBR275C::chr00_16a	YBR275C	RIF1
YMR154C::chr00_10	YMR154C	RIM13
YNL294C::chr14_1	YNL294C	RIM21
YGL046W::chr7_1	YGL045W	RIM8
YMR063W::chr00_6	YMR063W	RIM9
YEL024W::chr5_2	YEL024W	RIP1
YDR257C::chr4_6	YDR257C	RKM4
YPL089C::chr16_3	YPL089C	RLM1
YDL001W::chr4_1	YDL001W	RMD1
YDR255C::chr4_6	YDR255C	RMD5
YFR048W::chr00_2	YFR048W	RMD8
YGL107C::chr7_2	YGL107C	RMD9
YPL024W::chr16_3	YPL024W	RMI1
YDR279W::chr4_6	YDR279W	RNH202
YLR154C::chr12_3	YLR154C	RNH203
YER070W::chr5_3	YER070W	RNR1
YGR180C::chr7_5	YGR180C	RNR4
YGR070W::chr7_4	YGR070W	ROM1
YPR065W::chr16_4	YPR065W	ROX1
YBL093C::chr2_1	YBL093C	ROX3
YJR063W::chr00_13	YJR063W	RPA12
YNL248C::chr14_1	YNL248C	RPA49
YJL140W::chr00_14	YJL140W	RPB4
YGL070C::chr7_1	YGL070C	RPB9
YMR142C::chr00_8	YMR142C	RPL13B
YGL135W::chr7_2	YGL135W	RPL1B
YOR312C::chr15_4	YOR312C	RPL20B
YBR191W::chr00_11	YBR191W	RPL21A
YPL079W::chr16_3	YPL079W	RPL21B
YLR061W::chr12_2	YLR061W	RPL22A
YFR032C-A::chr00_2	YFR032C-A	RPL29
YDL075W::chr4_1	YDL075W	RPL31A
YJL189W::chr00_14	YJL189W	RPL39
YGL076C::chr7_1	YGL076C	RPL7A
YDR382W::chr4_7	YDR382W	RPP2B
YLR048W::chr12_2	YLR048W	RPS0B
YOR293W::chr15_4	YOR293W	RPS10A
YOR369C::chr15_4	YOR369C	RPS12
YLR441C::chr00_4	YLR441C	RPS1A
YPR132W::chr16_5	YPR132W	RPS23B
YLR333C::chr12_5	YLR333C	RPS25B
YPL090C::chr16_3	YPL090C	RPS6A
YIL153W::chr9_2	YIL153W	RRD1
YPL152W::chr16_2	YPL152W	RRD2
YER066W::chr00_10	YER066W	RRT13
YNL105W::chr00_16b	YNL105W	RRT16
YPL193W::chr16_1	YPL193W	RSA1
YLR221C::chr12_3	YLR221C	RSA3
YLR357W::chr12_5	YLR357W	RSC2
YMR030W::chr13_2	YMR030W	RSF1
YDR175C::chr4_5	YDR175C	RSM24
YNL254C::chr14_1	YNL254C	RTC4
YGL244W::chr7_3	YGL244W	RTF1
YGL252C::chr7_3	YGL252C	RTG2
YGR275W::chr00_3	YGR275W	RTT102
YDR289C::chr4_6	YDR289C	RTT103
YHR154W::chr8_3	YHR154W	RTT107
YLL002W::chr12_1	YLL002W	RTT109
YCR009C::chr3_1	YCR009C	RVS161
YDR388W::chr4_7	YDR388W	RVS167
YKL212W::chr11_3	YKL212W	SAC1
YDR129C::chr4_4	YDR129C	SAC6
YDR389W::chr4_7	YDR389W	SAC7
YBL052C::chr2_1	YBL052C	SAS3
YGR263C::chr00_3	YGR263C	SAY1
YDR351W::chr4_7	YDR351W	SBE2
YMR272C::chr13_5	YMR272C	SCS7
YKL148C::chr11_2	YKL148C	SDH1
YMR086W::chr00_6	YMR086W	SEG1
YJL168C::chr10_1	YJL168C	SET2
YKR029C::chr00_14	YKR029C	SET3
YHR207C::chr8_3	YHR207C	SET5
YLR403W::chr12_5	YLR403W	SFP1
YOR073W::chr15_1	YOR073W	SGO1
YGL228W::chr7_3	YGL228W	SHE10
YOR035C::chr15_1	YOR035C	SHE4
YBL058W::chr2_1	YBL058W	SHP1
YNL236W::chr14_2	YNL236W	SIN4
YDR422C::chr4_7	YDR422C	SIP1
YGL208W::chr7_3	YGL208W	SIP2
YJL089W::chr10_2	YJL089W	SIP4
YPR189W::chr16_5	YPR189W	SKI3
YGL213C::chr7_3	YGL213C	SKI8
YPL026C::chr16_3	YPL026C	SKS1
YBL007C::chr2_1	YBL007C	SLA1
YNL243W::chr14_2	YNL243W	SLA2
YBR156C::chr2_3	YBR156C	SLI15
YNL047C::chr00_18	YNL047C	SLM2
YBR266C::chr2_4	YBR266C	SLM6
YHR030C::chr8_1	YHR030C	SLT2
YDL013W::chr4_1	YDL013W	SLX5
YER116C::chr00_5	YER116C	SLX8
YNL196C::chr14_2	YNL196C	SLZ1
YPL027W::chr00_17b	YPL027W	SMA1
YML066C::chr00_15	YML066C	SMA2
YNR023W::chr14_4	YNR023W	SNF12
YBR289W::chr00_16a	YBR289W	SNF5
YHL025W::chr00_8	YHL025W	SNF6
YPL002C::chr16_3	YPL002C	SNF8
YPR101W::chr16_4	YPR101W	SNT309
YOR357C::chr15_4	YOR357C	SNX3
YMR016C::chr13_2	YMR016C	SOK2
YCR073W-A::chr00_1	YCR073W-A	SOL2
YHR163W::chr8_3	YHR163W	SOL3
YMR066W::chr00_6	YMR066W	SOV1
YJR010C-A::chr00_13	YJR010C-A	SPC1
YAL047C::chr00_12	YAL047C	SPC72
YHR014W::chr8_1	YHR014W	SPO13
YKR031C::chr11_3	YKR031C	SPO14
YHR153C::chr8_3	YHR153C	SPO16
YOR313C::chr15_4	YOR313C	SPS4
YJL127C::chr10_2	YJL127C	SPT10
YER161C::chr00_5	YER161C	SPT2
YKL020C::chr11_1	YKL020C	SPT23
YDR392W::chr4_7	YDR392W	SPT3
YGR063C::chr00_14	YGR063C	SPT4
YBR081C::chr2_3	YBR081C	SPT7
YGR104C::chr7_4	YGR104C	SRB5
YKR091W::chr00_4	YKR091W	SRL3
YLR119W::chr12_2	YLR119W	SRN2
YPR032W::chr16_4	YPR032W	SRO7
YMR101C::chr00_9	YMR101C	SRT1
YNL138W::chr00_17b	YNL138W	SRV2
YHR066W::chr8_2	YHR066W	SSF1
YPL042C::chr16_3	YPL042C	SSN3
YLR369W::chr12_5	YLR369W	SSQ1
YLR452C::chr00_4	YLR452C	SST2
YHR064C::chr00_8	YHR064C	SSZ1
YHR178W::chr8_3	YHR178W	STB5
YLR150W::chr12_3	YLR150W	STM1
YMR125W::chr00_9	YMR125W	STO1
YNL066W::chr00_16b	YNL066W	SUN4
YDR320C::chr4_6	YDR320C	SWA2
YDR126W::chr4_4	YDR126W	SWF1
YAR044W::chr1_1	YAR042W	SWH1
YJL176C::chr10_1	YJL176C	SWI3
YDR260C::chr4_6	YDR260C	SWM1
YDR334W::chr4_6	YDR334W	SWR1
YLR251W::chr12_4	YLR251W	SYM1
YJL004C::chr00_13	YJL004C	SYS1
YGL243W::chr7_3	YGL243W	TAD1
YPL129W::chr16_2	YPL129W	TAF14
YOR086C::chr15_1	YOR086C	TCB1
YBR044C::chr2_2	YBR044C	TCM62
YJL052W::chr10_2	YJL052W	TDH1
YBR118W::chr2_3	YBR118W	TEF2
YKL081W::chr11_1	YKL081W	TEF4
YBL088C::chr2_1	YBL088C	TEL1
YNL128W::chr14_3	YNL128W	TEP1
YNL139C::chr14_3	YNL139C	THO2
YOL072W::chr15_5	YOL072W	THP1
YHR167W::chr8_3	YHR167W	THP2
YHR025W::chr00_10	YHR025W	THR1
YCR053W::chr00_16a	YCR053W	THR4
YKR059W::chr11_3	YKR059W	TIF1
YPR163C::chr16_5	YPR163C	TIF3
YNL070W::chr00_16b	YNL070W	TOM7
YLR234W::chr12_4	YLR234W	TOP3
YBR162C::chr2_3	YBR162C	TOS1
YNL300W::chr00_8	YNL300W	TOS6
YAL016W::chr00_12	YAL016W	TPD3
YKL166C::chr11_2	YKL166C	TPK3
YBR126C::chr2_3	YBR126C	TPS1
YMR261C::chr13_5	YMR261C	TPS3
YJL129C::chr00_14	YJL129C	TRK1
YML005W::chr13_2	YML005W	TRM12
YPL030W::chr16_3	YPL030W	TRM44
YDR165W::chr4_5	YDR165W	TRM82
YML014W::chr13_2	YML014W	TRM9
YDR354W::chr4_7	YDR354W	TRP4
YDR453C::chr4_8	YDR453C	TSA2
YLR435W::chr00_4	YLR435W	TSR2
YOR187W::chr15_2	YOR187W	TUF1
YCR084C::chr00_16a	YCR084C	TUP1
YOR295W::chr15_4	YOR295W	UAF30
YBR082C::chr2_3	YBR082C	UBC4
YEL012W::chr00_10	YEL012W	UBC8
YPL072W::chr16_3	YPL072W	UBP16
YFR010W::chr6_1	YFR010W	UBP6
YDR330W::chr4_6	YDR330W	UBX5
YBR273C::chr00_1	YBR273C	UBX7
YDR470C::chr4_8	YDR470C	UGO1
YKR044W::chr11_3	YKR044W	UIP5
YML021C::chr00_4	YML021C	UNG1
YLR168C::chr12_3	YLR168C	UPS2
YKL216W::chr11_3	YKL216W	URA1
YML106W::chr00_9	YML106W	URA5
YDR400W::chr4_7	YDR400W	URH1
YNL054W::chr14_3	YNL054W	VAC7
YEL013W::chr5_2	YEL013W	VAC8
YGL212W::chr7_3	YGL212W	VAM7
YGL258W::chr7_3	YGL258W	VEL1
YDR247W::chr4_6	YDR247W	VHS1
YLR373C::chr12_5	YLR373C	VID22
YLR410W::chr12_5	YLR410W	VIP1
YDL185W::chr4_2	YDL185W	VMA1
YHR039C-B::chr00_3	YHR039C-A	VMA10
YPL234C::chr16_1	YPL234C	VMA11
YPR036W::chr16_4	YPR036W	VMA13
YHR026W::chr00_10	YHR026W	VMA16
YBR127C::chr2_3	YBR127C	VMA2
YGR105W::chr7_4	YGR105W	VMA21
YHR060W::chr8_2	YHR060W	VMA22
YKL080W::chr11_1	YKL080W	VMA5
YGR020C::chr7_3	YGR020C	VMA7
YEL051W::chr5_2	YEL051W	VMA8
YKL119C::chr11_2	YKL119C	VPH2
YKR001C::chr11_3	YKR001C	VPS1
YBR097W::chr2_3	YBR097W	VPS15
YPL045W::chr16_3	YPL045W	VPS16
YKL041W::chr11_1	YKL041W	VPS24
YJR102C::chr10_4	YJR102C	VPS25
YLR396C::chr12_5	YLR396C	VPS33
YLR240W::chr12_4	YLR240W	VPS34
YLR417W::chr12_5	YLR417W	VPS36
YPR173C::chr16_5	YPR173C	VPS4
YGL095C::chr7_1	YGL095C	VPS45
YJL029C::chr00_13	YJL029C	VPS53
YDR027C::chr4_3	YDR027C	VPS54
YJR044C::chr00_13	YJR044C	VPS55
YDR200C::chr4_5	YDR200C	VPS64
YLR337C::chr12_5	YLR337C	VRP1
YER072W::chr5_3	YER072W	VTC1
YLR090W::chr12_2	YLR090W	XDJ1
YDR369C::chr4_7	YDR369C	XRS2
YNL107W::chr00_16b	YNL107W	YAF9
YHR161C::chr8_3	YHR161C	YAP1801
YBL012C::chr2_1	YBL012C	YBL012C
YBL029W::chr2_1	YBL029W	YBL029W
YBL055C::chr2_1	YBL055C	YBL055C
YBL059W::chr2_1	YBL059W	YBL059W
YBL065W::chr2_1	YBL065W	YBL065W
YBL081W::chr2_1	YBL081W	YBL081W
YBR056W::chr2_2	YBR056W	YBR056W
YBR090C::chr00_16a	YBR090C	YBR090C
YBR113W::chr2_3	YBR113W	YBR113W
YBR137W::chr2_3	YBR137W	YBR137W
YNL154C::chr14_2	YNL154C	YCK2
YCL007C::chr3_1	YCL007C	YCL007C
YCR050C::chr00_1	YCR050C	YCR050C
YCR064C::chr00_16a	YCR064C	YCR064C
YCR087C-A::chr00_1	YCR087C-A	YCR087C-A
YCR087W::chr00_1	YCR087W	YCR087W
YLL055W::chr12_1	YLL055W	YCT1
YNL064C::chr14_3	YNL064C	YDJ1
YDL206W::chr4_3	YDL206W	YDL206W
YDL241W::chr4_3	YDL241W	YDL241W
YDR179W-A::chr4_5	YDR179W-A	YDR179W-A
YDR199W::chr4_5	YDR199W	YDR199W
YDR249C::chr4_6	YDR249C	YDR249C
YDR250C::chr4_6	YDR250C	YDR250C
YDR262W::chr4_6	YDR262W	YDR262W
YDR266C::chr4_6	YDR266C	YDR266C
YDR269C::chr4_6	YDR269C	YDR269C
YDR271C::chr4_6	YDR271C	YDR271C
YDR274C::chr4_6	YDR274C	YDR274C
YDR278C::chr4_6	YDR278C	YDR278C
YDR282C::chr4_6	YDR282C	YDR282C
YDR286C::chr4_6	YDR286C	YDR286C
YDR290W::chr4_6	YDR290W	YDR290W
YDR307W::chr4_6	YDR307W	YDR307W
YDR333C::chr4_6	YDR333C	YDR333C
YDR336W::chr4_6	YDR336W	YDR336W
YDR338C::chr4_7	YDR338C	YDR338C
YDR352W::chr4_7	YDR352W	YDR352W
YDR374C::chr4_7	YDR374C	YDR374C
YDR387C::chr4_7	YDR387C	YDR387C
YDR401W::chr4_7	YDR401W	YDR401W
YDR415C::chr4_7	YDR415C	YDR415C
YDR442W::chr4_8	YDR442W	YDR442W
YDR455C::chr4_8	YDR455C	YDR455C
YDR535C::chr00_2	YDR535C	YDR535C
YEL006W::chr5_2	YEL006W	YEA6
YEL045C::chr5_2	YEL045C	YEL045C
YBL060W::chr2_1	YBL060W	YEL1
YER046W-A::chr5_3	YER046W-A	YER046W-A
YER066C-A::chr5_3	YER066C-A	YER066C-A
YFL013W-A::chr00_15	YFL013W-A	YFL013W-A
YFL015C::chr6_1	YFL015C	YFL015C
YFR016C::chr6_1	YFR016C	YFR016C
YGL036W::chr7_1	YGL036W	YGL036W
YGL088W::chr7_1	YGL088W	YGL088W
YGL199C::chr7_3/chr00_12	YGL199C	YGL199C
YGL214W::chr7_3/chr00_12	YGL214W	YGL214W
YGL218W::chr7_3/chr00_12	YGL218W	YGL218W
YGL262W::chr7_3	YGL262W	YGL262W
YGR001C::chr7_3	YGR001C	YGR001C
YGR016W::chr7_3	YGR016W	YGR016W
YGR122C-A::chr00_17a	YGR122C-A	YGR122C-A
YGR122W::chr7_4	YGR122W	YGR122W
YGR290W::chr00_3	YGR290W	YGR290W
YJL059W::chr10_2	YJL059W	YHC3
YHR029C::chr8_1	YHR029C	YHI9
YHR080C::chr8_2	YHR080C	YHR080C
YHR127W::chr00_10	YHR127W	YHR127W
YHR180W::chr00_10	YHR180W	YHR180W
YHR182W::chr8_3	YHR182W	YHR182W
YHR210C::chr8_3	YHR210C	YHR210C
YIL025C::chr9_1	YIL025C	YIL025C
YIL058W::chr00_17b	YIL058W	YIL058W
YIL092W::chr00_17b	YIL092W	YIL092W
YIL152W::chr9_2	YIL152W	YIL152W
YGL198W::chr7_3	YGL198W	YIP4
YJL045W::chr10_2	YJL045W	YJL045W
YJL175W::chr00_14	YJL175W	YJL175W
YJR018W::chr00_13	YJR018W	YJR018W
YLR200W::chr12_3	YLR200W	YKE2
YKL069W::chr11_1	YKL069W	YKL069W
YKL115C::chr00_14	YKL115C	YKL115C
YKL118W::chr11_2	YKL118W	YKL118W
YKR032W::chr11_3	YKR032W	YKR032W
YKR045C::chr11_3	YKR045C	YKR045C
YKR073C::chr00_3	YKR073C	YKR073C
YPR125W::chr16_5	YPR125W	YLH47
YLL020C::chr12_1	YLL020C	YLL020C
YLR053C::chr12_2	YLR053C	YLR053C
YLR108C::chr12_2	YLR108C	YLR108C
YLR112W::chr12_2	YLR112W	YLR112W
YLR124W::chr12_2	YLR124W	YLR124W
YLR143W::chr12_3	YLR143W	YLR143W
YLR169W::chr12_3	YLR169W	YLR169W
YLR173W::chr12_3	YLR173W	YLR173W
YLR184W::chr12_3	YLR184W	YLR184W
YLR194C::chr12_3	YLR194C	YLR194C
YLR202C::chr12_3	YLR202C	YLR202C
YLR217W::chr12_3	YLR217W	YLR217W
YLR235C::chr12_4	YLR235C	YLR235C
YLR281C::chr12_4	YLR281C	YLR281C
YLR287C::chr12_4	YLR287C	YLR287C
YLR294C::chr12_4	YLR294C	YLR294C
YLR312C::chr12_4	YLR312C	YLR312C
YLR349W::chr12_5	YLR349W	YLR349W
YLR358C::chr00_11	YLR358C	YLR358C
YLR365W::chr12_5	YLR365W	YLR365W
YLR444C::chr00_4	YLR444C	YLR444C
YMR302C::chr13_5	YMR302C	YME2
YML010W-A::chr13_2	YML009W-B	YML009W-B
YML013C-A::chr13_2	YML012C-A	YML012C-A
YML018C::chr13_2	YML018C	YML018C
YML048W-A::chr13_1b	YML047W-A	YML047W-A
YML058C-A::chr13_1b	YML057C-A	YML057C-A
YML083C::chr13_1b	YML083C	YML083C
YML089C::chr13_1b	YML089C	YML089C
YML122C::chr00_9	YML122C	YML122C
YMR031W-A::chr13_2	YMR031W-A	YMR031W-A
YMR099C::chr00_9	YMR099C	YMR099C
YMR158C-B::chr00_4	YMR158C-A	YMR158C-A
YMR194C-A::chr00_4	YMR194C-A	YMR194C-A
YMR262W::chr13_5	YMR262W	YMR262W
YNL046W::chr14_4	YNL046W	YNL046W
YNL058C::chr14_3	YNL058C	YNL058C
YNL092W::chr14_3	YNL092W	YNL092W
YNL108C::chr14_3	YNL108C	YNL108C
YNL109W::chr00_18	YNL109W	YNL109W
YNL122C::chr14_3	YNL122C	YNL122C
YNL140C::chr00_17b	YNL140C	YNL140C
YNL155W::chr14_2	YNL155W	YNL155W
YNL179C::chr14_2	YNL179C	YNL179C
YNL184C::chr14_2	YNL184C	YNL184C
YNL198C::chr14_2	YNL198C	YNL198C
YNL217W::chr14_2	YNL217W	YNL217W
YNL228W::chr14_2	YNL228W	YNL228W
YNR005C::chr14_4	YNR005C	YNR005C
YNR029C::chr14_4	YNR029C	YNR029C
YNR042W::chr14_4	YNR042W	YNR042W
YNR061C::chr00_4	YNR061C	YNR061C
YNR065C::chr00_4	YNR065C	YNR065C
YOR008C-A::chr00_10	YOR008C-A	YOR008C-A
YOR015W::chr15_1	YOR015W	YOR015W
YOR019W::chr15_1	YOR019W	YOR019W
YOR072W::chr15_1	YOR072W	YOR072W
YOR302W::chr00_17b	YOR302W	YOR302W
YOR331C::chr15_4	YOR331C	YOR331C
YOR364W::chr15_4	YOR364W	YOR364W
YPL025C::chr16_3	YPL025C	YPL025C
YPL034W::chr00_17b	YPL034W	YPL034W
YPL068C::chr16_3	YPL068C	YPL068C
YPL077C::chr16_3	YPL077C	YPL077C
YPL113C::chr16_2	YPL113C	YPL113C
YPL185W::chr16_2	YPL185W	YPL185W
YPL225W::chr16_1	YPL225W	YPL225W
YPL260W::chr16_1	YPL260W	YPL260W
YPR003C::chr16_3	YPR003C	YPR003C
YPR059C::chr16_4	YPR059C	YPR059C
YPR098C::chr16_4	YPR098C	YPR098C
YDR368W::chr4_7	YDR368W	YPR1
YPR127W::chr16_5	YPR127W	YPR127W
YPR147C::chr16_5	YPR147C	YPR147C
YPR153W::chr16_5	YPR153W	YPR153W
YPR197C::chr16_5	YPR197C	YPR197C
YER031C::chr00_10	YER031C	YPT31
YNL093W::chr00_16b	YNL093W	YPT53
YLR262C::chr12_4	YLR262C	YPT6
YMR089C::chr00_6	YMR089C	YTA12
YIR026C::chr00_3	YIR026C	YVH1
YDR285W::chr4_6	YDR285W	ZIP1
YGL249W::chr7_3	YGL249W	ZIP2
YMR243C::chr13_5	YMR243C	ZRC1
YGL255W::chr7_3	YGL255W	ZRT1
YGR285C::chr00_3	YGR285C	ZUO1
