# Supplementary material for: Genes Required for Survival in Microgravity Revealed by Genome-Wide Yeast Deletion Collections Cultured during Spaceflight
Source: Biomed Res Int. 2015 Jan 13;2015:976458. doi: 10.1155/2015/976458 (PMC4309212; doi:10.1155/2015/976458)
Supplement: Supplementary file 1 — Supplementary tables 1 and 2 provide the Illumina sequencing counts for each barcode/strain of each sample following mean normalization for the homozygous strains (Supplementary Table S1) and the heterozygous deletion strains (Supplementary Table S2). Supplementary tables 3 and 4 list those strains in the homozygous deletion collection (Supplementary Table S3) and the heterozygous deletion collection (Supplementary Table S4) that were excluded from the analysis for technical reasons. Supplementary tables 5 and 6 contain the results from the analysis of the homozygous deletion collection, comparing ground experiments to flight experiments in YPD media (Supplementary Table S5) and in YPD media + 0.5M NaCl (Supplementary Table S6). Supplementary table S7 contains the concordance in GO enrichments of the experiments presented in this study to a compendium of published data (reference 13). Supplementary tables 8 and 9 contain the results from the analysis of the heterozygous deletion collection, comparing ground experiments to flight experiments in YPD media (Supplementary Table S8) and in YPD media + 0.5M NaCl (Supplementary Table S9). [file 976458.f1.zip › TableS4_excludedStrains-het.xlsx]

## Sheet: README
Table S4. Heterozygous deletion strains omitted from analyses (see Methods).
all sheets
Column	Description
Strain	a strain in the pool
ORF	the ORF deleted from the strain
Gene	the gene name associated with the deleted ORF

## Sheet: ground
Strain	ORF	Gene
YMR056C::chr00_5	YMR056C	AAC1
YBR085W::chr2_3	YBR085W	AAC3
YDL243C::chr4_3	YDL243C	AAD4
YNL141W::chr14_3	YNL141W	AAH1
YHR047C::chr8_2	YHR047C	AAP1
YBL074C::chr2_1	YBL074C	AAR2
YKL112W::chr11_2	YKL112W	ABF1
YMR072W::chr00_6	YMR072W	ABF2
YNR033W::chr00_18	YNR033W	ABZ1
YMR289W::chr13_5	YMR289W	ABZ2
YER045C::chr5_3	YER045C	ACA1
YGR037C::chr7_4	YGR037C	ACB1
YNR016C::chr14_4	YNR016C	ACC1
YLR131C::chr12_3	YLR131C	ACE2
YLR144C::chr12_3	YLR144C	ACF2
YBL015W::chr2_1	YBL015W	ACH1
YLR304C::chr12_4	YLR304C	ACO1
YKL192C::chr11_3	YKL192C	ACP1
YFL039C::chr00_15	YFL039C	ACT1
YDR448W::chr4_8	YDR448W	ADA2
YMR184W::chr13_4	YMR184W	ADD37
YKL206C::chr11_3	YKL206C	ADD66
YAR015W::chr1_1	YAR015W	ADE1
YNL220W::chr00_18	YNL220W	ADE12
YLR028C::chr12_1	YLR028C	ADE16
YOR128C::chr15_2	YOR128C	ADE2
YMR300C::chr13_5	YMR300C	ADE4
YGL234W::chr7_3	YGL234W	ADE5,7
YDR408C::chr4_7	YDR408C	ADE8
YOL086C::chr00_6	YOL086C	ADH1
YGL256W::chr7_3	YGL256W	ADH4
YBR145W::chr2_3	YBR145W	ADH5
YCR105W::chr00_2	YCR105W	ADH7
YMR009W::chr13_2	YMR009W	ADI1
YER170W::chr00_5	YER170W	ADK2
YLR227C::chr12_3	YLR227C	ADY4
YMR064W::chr00_6	YMR064W	AEP1
YMR282C::chr13_5	YMR282C	AEP2
YER017C::chr5_3	YER017C	AFG3
YNR044W::chr14_4	YNR044W	AGA1
YGL032C::chr7_1	YGL032C	AGA2
YIL044C::chr9_1	YIL044C	AGE2
YCL025C::chr3_1	YCL025C	AGP1
YBR132C::chr2_3	YBR132C	AGP2
YFL055W::chr6_1	YFL055W	AGP3
YFL030W::chr6_1	YFL030W	AGX1
YDR214W::chr4_5	YDR214W	AHA1
YOR023C::chr15_1	YOR023C	AHC1
YCR082W::chr00_1	YCR082W	AHC2
YLR109W::chr12_2	YLR109W	AHP1
YHR093W::chr8_2	YHR093W	AHT1
YNR074C::chr00_6	YNR074C	AIF1
YAL046C::chr1_1	YAL046C	AIM1
YFR011C::chr00_16b	YFR011C	AIM13
YGL160W::chr7_2	YGL160W	AIM14
YHR198C::chr8_3	YHR198C	AIM18
YAL049C::chr1_1	YAL049C	AIM2
YIL158W::chr9_2	YIL158W	AIM20
YJL046W::chr10_2	YJL046W	AIM22
YBR108W::chr2_3	YBR108W	AIM3
YML050W::chr13_1b	YML050W	AIM32
YML087C::chr13_1b	YML087C	AIM33
YMR003W::chr13_2	YMR003W	AIM34
YNL100W::chr00_16b	YNL100W	AIM37
YBR194W::chr2_4	YBR194W	AIM4
YPL099C::chr16_2	YPL099C	AIM43
YPL158C::chr00_18	YPL158C	AIM44
YPR004C::chr16_3	YPR004C	AIM45
YHR199C::chr8_3	YHR199C	AIM46
YBR262C::chr2_4	YBR262C	AIM5
YMR092C::chr00_6	YMR092C	AIP1
YIL079C::chr9_1	YIL079C	AIR1
YDL175C::chr4_2	YDL175C	AIR2
YBR059C::chr2_2	YBR059C	AKL1
YDR264C::chr4_6	YDR264C	AKR1
YOR034C::chr15_1	YOR034C	AKR2
YOR335C::chr15_4	YOR335C	ALA1
YJL122W::chr10_2	YJL122W	ALB1
YMR169C::chr00_4	YMR169C	ALD3
YMR169C::chr13_4	YMR169C	ALD3
YPL061W::chr16_3	YPL061W	ALD6
YNL148C::chr14_2	YNL148C	ALF1
YBR110W::chr2_3	YBR110W	ALG1
YBR070C::chr2_2	YBR070C	ALG14
YBL082C::chr2_1	YBL082C	ALG3
YOR002W::chr15_1	YOR002W	ALG6
YNL219C::chr14_2	YNL219C	ALG9
YBL009W::chr2_1	YBL009W	ALK2
YML086C::chr13_1b	YML086C	ALO1
YNL270C::chr14_1	YNL270C	ALP1
YLR089C::chr12_2	YLR089C	ALT1
YDR111C::chr4_4	YDR111C	ALT2
YKR021W::chr11_3	YKR021W	ALY1
YJL084C::chr10_2	YJL084C	ALY2
YGR225W::chr00_2	YGR225W	AMA1
YML035C::chr00_14	YML035C	AMD1
YDR242W::chr4_6	YDR242W	AMD2
YGL156W::chr7_2	YGL156W	AMS1
YEL036C::chr5_2	YEL036C	ANP1
YPR180W::chr16_5	YPR180W	AOS1
YLR127C::chr12_3	YLR127C	APC2
YBR151W::chr2_3	YBR151W	APD1
YKL157W::chr11_2	YKL157W	APE2
YKL158W::chr11_2	YKL157W	APE2
YBR286W::chr00_1	YBR286W	APE3
YNL077W::chr14_3	YNL077W	APJ1
YJR005W::chr00_13	YJR005W	APL1
YKL135C::chr11_2	YKL135C	APL2
YBL037W::chr2_1	YBL037W	APL3
YPL195W::chr16_1	YPL195W	APL5
YOL062C::chr15_5	YOL062C	APM4
YKL114C::chr11_2	YKL114C	APN1
YBL019W::chr2_1	YBL019W	APN2
YNL094W::chr14_3	YNL094W	APP1
YIL040W::chr9_1	YIL040W	APQ12
YLR170C::chr12_3	YLR170C	APS1
YJR058C::chr00_13	YJR058C	APS2
YML022W::chr00_11	YML022W	APT1
YDR441C::chr4_8	YDR441C	APT2
YNL065W::chr00_16b	YNL065W	AQR1
YBR149W::chr2_3	YBR149W	ARA1
YMR041C::chr13_2	YMR041C	ARA2
YNR035C::chr14_4	YNR035C	ARC35
YHR013C::chr8_1	YHR013C	ARD1
YNR019W::chr14_4	YNR019W	ARE2
YDL192W::chr4_3	YDL192W	ARF1
YHR018C::chr8_1	YHR018C	ARG4
YER069W::chr5_3	YER069W	ARG5,6
YMR042W::chr13_2	YMR042W	ARG80
YDR173C::chr4_5	YDR173C	ARG82
YGL157W::chr7_2	YGL157W	ARI1
YNL020C::chr14_4	YNL020C	ARK1
YBR164C::chr2_3	YBR164C	ARL1
YPL051W::chr16_3	YPL051W	ARL3
YDR380W::chr4_7	YDR380W	ARO10
YPR060C::chr16_4	YPR060C	ARO7
YGL202W::chr7_3	YGL202W	ARO8
YDR421W::chr4_7	YDR421W	ARO80
YHR137W::chr8_2	YHR137W	ARO9
YHR129C::chr8_2	YHR129C	ARP1
YJR065C::chr00_13	YJR065C	ARP3
YJL081C::chr10_2	YJL081C	ARP4
YMR033W::chr00_11	YMR033W	ARP9
YMR033W::chr13_2	YMR033W	ARP9
YPR199C::chr16_5	YPR199C	ARR1
YPR200C::chr16_5	YPR200C	ARR2
YGR068C::chr7_4	YGR068C	ART5
YLR242C::chr12_4	YLR242C	ARV1
YPR085C::chr16_4	YPR085C	ASA1
YJL170C::chr10_1	YJL170C	ASG7
YMR119W::chr00_15	YMR119W	ASI1
YNL159C::chr14_2	YNL159C	ASI2
YGR097W::chr7_4	YGR097W	ASK10
YDL088C::chr4_1	YDL088C	ASM4
YDR321W::chr4_6	YDR321W	ASP1
YBL069W::chr2_1	YBL069W	AST1
YER101C::chr00_5	YER101C	AST2
YDR184C::chr4_5	YDR184C	ATC1
YGR177C::chr7_5	YGR177C	ATF2
YGL180W::chr7_2	YGL180W	ATG1
YPR049C::chr16_4	YPR049C	ATG11
YPR185W::chr16_5	YPR185W	ATG13
YBR128C::chr2_3	YBR128C	ATG14
YCR068W::chr00_1	YCR068W	ATG15
YOL082W::chr15_5	YOL082W	ATG19
YCL038C::chr00_12	YCL038C	ATG22
YLR431C::chr00_4	YLR431C	ATG23
YLR189C::chr12_3	YLR189C	ATG26
YNR007C::chr14_4	YNR007C	ATG3
YIL146C::chr9_2	YIL146C	ATG32
YLR356W::chr12_5	YLR356W	ATG33
YOL083W::chr15_5	YOL083W	ATG34
YNL223W::chr14_2	YNL223W	ATG4
YPL149W::chr16_2	YPL149W	ATG5
YHR171W::chr00_15	YHR171W	ATG7
YBL078C::chr2_1	YBL078C	ATG8
YPR026W::chr00_15	YPR026W	ATH1
YMR301C::chr13_5	YMR301C	ATM1
YDR384C::chr4_7	YDR384C	ATO3
YBL099W::chr2_2	YBL099W	ATP1
YLR393W::chr12_5	YLR393W	ATP10
YNL315C::chr00_17b	YNL315C	ATP11
YPL271W::chr16_1	YPL271W	ATP15
YDR377W::chr4_7	YDR377W	ATP17
YML081C-A::chr00_4	YML081C-A	ATP18
YPR020W::chr16_4	YPR020W	ATP20
YDR350C::chr4_7	YDR350C	ATP22
YMR098C::chr00_9	YMR098C	ATP25
YBR039W::chr2_2	YBR039W	ATP3
YPL078C::chr00_17b	YPL078C	ATP4
YPL078C::chr16_3	YPL078C	ATP4
YDR298C::chr4_6	YDR298C	ATP5
YAL020C::chr1_1	YAL020C	ATS1
YOR079C::chr15_1	YOR079C	ATX2
YFL010W-A::chr00_17a	YFL010W-A	AUA1
YLR114C::chr12_2	YLR114C	AVL9
YOL078W::chr00_8	YOL078W	AVO1
YMR068W::chr00_6	YMR068W	AVO2
YJR001W::chr00_13	YJR001W	AVT1
YNL101W::chr14_3	YNL101W	AVT4
YBL089W::chr2_1	YBL089W	AVT5
YIL140W::chr9_2	YIL140W	AXL2
YLL063C::chr12_1	YLL063C	AYT1
YGR224W::chr00_2	YGR224W	AZR1
YBR068C::chr2_2	YBR068C	BAP2
YKR099W::chr00_4	YKR099W	BAS1
YJL095W::chr10_2	YJL095W	BCK1
YER167W::chr00_5	YER167W	BCK2
YDR361C::chr4_7	YDR361C	BCP1
YDR375C::chr4_7	YDR375C	BCS1
YAL060W::chr1_1	YAL060W	BDH1
YAL061W::chr1_1	YAL061W	BDH2
YNL039W::chr14_4	YNL039W	BDP1
YBR200W::chr2_4	YBR200W	BEM1
YER155C::chr00_5	YER155C	BEM2
YLR412W::chr12_5	YLR412W	BER1
YIL004C::chr9_1	YIL004C	BET1
YPR176C::chr16_5	YPR176C	BET2
YJL031C::chr10_2	YJL031C	BET4
YML077W::chr00_11	YML077W	BET5
YJR053W::chr00_13	YJR053W	BFA1
YDR299W::chr4_6	YDR299W	BFR2
YGR282C::chr00_3	YGR282C	BGL2
YER016W::chr5_3	YER016W	BIM1
YGR286C::chr00_3	YGR286C	BIO2
YNR057C::chr00_4	YNR057C	BIO4
YNR056C::chr00_4	YNR056C	BIO5
YFL006W::chr6_1	YFL007W	BLM10
YFL007W::chr00_17a	YFL007W	BLM10
YER177W::chr00_5	YER177W	BMH1
YPL217C::chr00_18	YPL217C	BMS1
YJL060W::chr10_2	YJL060W	BNA3
YLR231C::chr12_4	YLR231C	BNA5
YFR047C::chr00_2	YFR047C	BNA6
YDR428C::chr4_7	YDR428C	BNA7
YNL271C::chr14_1	YNL271C	BNI1
YIL159W::chr9_2	YIL159W	BNR1
YGR230W::chr00_2	YGR230W	BNS1
YBL085W::chr2_1	YBL085W	BOI1
YLR267W::chr12_4	YLR267W	BOP2
YNL042W::chr14_4	YNL042W	BOP3
YNL275W::chr14_1	YNL275W	BOR1
YNR051C::chr00_4	YNR051C	BRE5
YHR036W::chr8_1	YHR036W	BRL1
YBL097W::chr2_2	YBL097W	BRN1
YPL084W::chr16_3	YPL084W	BRO1
YGL247W::chr7_3	YGL247W	BRR6
YOL077C::chr15_5	YOL077C	BRX1
YDR275W::chr4_6	YDR275W	BSC2
YNL269W::chr14_1	YNL269W	BSC4
YNR069C::chr00_15	YNR069C	BSC5
YOL137W::chr00_6	YOL137W	BSC6
YBR290W::chr00_1	YBR290W	BSD2
YPR171W::chr16_5	YPR171W	BSP1
YFL025C::chr6_1	YFL025C	BST1
YPL069C::chr16_3	YPL069C	BTS1
YDR252W::chr4_6	YDR252W	BTT1
YMR055C::chr00_5	YMR055C	BUB2
YOR026W::chr15_1	YOR026W	BUB3
YGL174W::chr7_2	YGL174W	BUD13
YAR014C::chr1_1	YAR014C	BUD14
YJL188C::chr10_1	YJL188C	BUD19
YMR014W::chr13_2	YMR014W	BUD22
YCR047C::chr00_16a	YCR047C	BUD23
YER014C-A::chr5_3	YER014C-A	BUD25
YDR241W::chr4_5	YDR241W	BUD26
YFL023W::chr6_1	YFL023W	BUD27
YLR062C::chr12_2	YLR062C	BUD28
YCR063W::chr00_1	YCR063W	BUD31
YGR041W::chr7_4	YGR041W	BUD9
YML111W::chr00_9	YML111W	BUL2
YLR226W::chr12_3	YLR226W	BUR2
YER159C::chr00_5	YER159C	BUR6
YNL305C::chr14_1	YNL305C	BXI1
YIL083C::chr9_1	YIL083C	CAB2
YKL088W::chr11_1	YKL088W	CAB3
YGR277C::chr00_3	YGR277C	CAB4
YML102W::chr00_9	YML102W	CAC2
YDR423C::chr4_7	YDR423C	CAD1
YNL278W::chr14_1	YNL278W	CAF120
YKR036C::chr00_14	YKR036C	CAF4
YFL029C::chr00_18	YFL029C	CAK1
YKL007W::chr11_1	YKL007W	CAP1
YPL111W::chr16_2	YPL111W	CAR1
YMR280C::chr13_5	YMR280C	CAT8
YGR036C::chr7_4	YGR036C	CAX4
YPL178W::chr16_2	YPL178W	CBC2
YGR140W::chr7_5	YGR140W	CBF2
YLR175W::chr12_3	YLR175W	CBF5
YNL161W::chr14_2	YNL161W	CBK1
YJL209W::chr10_1	YJL209W	CBP1
YPL215W::chr16_1	YPL215W	CBP3
YGR174C::chr7_5	YGR174C	CBP4
YBR120C::chr2_3	YBR120C	CBP6
YIL043C::chr9_1	YIL043C	CBR1
YDR197W::chr4_5	YDR197W	CBS2
YKL208W::chr11_3	YKL208W	CBT1
YER168C::chr00_5	YER168C	CCA1
YLR220W::chr12_3	YLR220W	CCC1
YDR270W::chr4_6	YDR270W	CCC2
YKR066C::chr00_3	YKR066C	CCP1
YAL021C::chr1_1	YAL021C	CCR4
YMR038C::chr13_2	YMR038C	CCS1
YJL014W::chr00_13	YJL014W	CCT3
YJR064W::chr00_13	YJR064W	CCT5
YDR188W::chr4_5	YDR188W	CCT6
YJL008C::chr00_13	YJL008C	CCT8
YLR110C::chr00_15	YLR110C	CCW12
YLR390W-A::chr00_15	YLR390W-A	CCW14
YBR131W::chr00_16a	YBR131W	CCZ1
YLR307W::chr12_4	YLR307W	CDA1
YDR182W::chr4_5	YDR182W	CDC1
YFR028C::chr00_15	YFR028C	CDC14
YAR019C::chr1_1	YAR019C	CDC15
YKL022C::chr11_1	YKL022C	CDC16
YAL038W::chr1_1	YAL038W	CDC19
YOR074C::chr15_1	YOR074C	CDC21
YHR166C::chr8_3	YHR166C	CDC23
YAL041W::chr1_1	YAL041W	CDC24
YBL084C::chr2_1	YBL084C	CDC27
YBR160W::chr2_3	YBR160W	CDC28
YBR160W_AS::shawn	YBR160W	CDC28
YLR314C::chr12_4	YLR314C	CDC3
YOL139C::chr00_15	YOL139C	CDC33
YCR093W::chr00_2	YCR093W	CDC39
YDR364C::chr4_7	YDR364C	CDC40
YLR229C::chr12_4	YLR229C	CDC42
YLR103C::chr12_2	YLR103C	CDC45
YMR001C::chr13_2	YMR001C	CDC5
YJL194W::chr10_1	YJL194W	CDC6
YPL160W::chr16_2	YPL160W	CDC60
YLR418C::chr12_5	YLR418C	CDC73
YJR057W::chr00_13	YJR057W	CDC8
YBR029C::chr2_2	YBR029C	CDS1
YER061C::chr5_3	YER061C	CEM1
YMR168C::chr13_4	YMR168C	CEP3
YOR112W::chr15_2	YOR112W	CEX1
YIL003W::chr9_1	YIL003W	CFD1
YDR301W::chr4_6	YDR301W	CFT1
YLR115W::chr12_2	YLR115W	CFT2
YGL206C::chr7_3	YGL206C	CHC1
YBR274W::chr00_1	YBR274W	CHK1
YPL008W::chr16_3	YPL008W	CHL1
YDR254W::chr4_6	YDR254W	CHL4
YGR157W::chr7_5	YGR157W	CHO2
YNL192W::chr14_2	YNL192W	CHS1
YBR038W::chr2_2	YBR038W	CHS2
YBR023C::chr2_2	YBR023C	CHS3
YLR330W::chr12_5	YLR330W	CHS5
YHR142W::chr8_3	YHR142W	CHS7
YER030W::chr5_3	YER030W	CHZ1
YDR267C::chr4_6	YDR267C	CIA1
YMR198W::chr00_11	YMR198W	CIK1
YPL241C::chr16_1	YPL241C	CIN2
YMR138W::chr00_11	YMR138W	CIN4
YOR028C::chr15_1	YOR028C	CIN5
YEL061C::chr5_2	YEL061C	CIN8
YOR356W::chr15_4	YOR356W	CIR2
YJL158C::chr10_1	YJL158C	CIS3
YNR001C::chr14_4	YNR001C	CIT1
YPR001W::chr16_3	YPR001W	CIT3
YLR133W::chr12_3	YLR133W	CKI1
YBR135W::chr2_3	YBR135W	CKS1
YPR119W::chr16_5	YPR119W	CLB2
YLR210W::chr12_3	YLR210W	CLB4
YGR110W::chr00_14	YGR110W	CLD1
YLR117C::chr12_2	YLR117C	CLF1
YGL215W::chr7_3	YGL215W	CLG1
YAL040C::chr1_1	YAL040C	CLN3
YMR012W::chr13_2	YMR012W	CLU1
YKL137W::chr11_2	YKL137W	CMC1
YBR109C::chr2_3	YBR109C	CMD1
YFR014C::chr6_1	YFR014C	CMK1
YML057W::chr13_1b	YML057W	CMP2
YLR003C::chr12_1	YLR003C	CMS1
YKL190W::chr11_2	YKL190W	CNB1
YAL058W::chr1_1	YAL058W	CNE1
YDR357C::chr4_7	YDR357C	CNL1
YFR046C::chr00_2	YFR046C	CNN1
YBR155W::chr2_3	YBR155W	CNS1
YLR218C::chr12_3	YLR218C	COA4
YLL050C::chr12_1	YLL050C	COF1
YGL223C::chr7_3	YGL223C	COG1
YER157W::chr00_5	YER157W	COG3
YPR105C::chr16_5	YPR105C	COG4
YNL051W::chr00_16b	YNL051W	COG5
YNL041C::chr14_4	YNL041C	COG6
YGL005C::chr7_1	YGL005C	COG7
YML071C::chr00_9	YML071C	COG8
YDL145C::chr4_2	YDL145C	COP1
YBR003W::chr2_2	YBR003W	COQ1
YNR041C::chr14_4	YNR041C	COQ2
YOL096C::chr00_6	YOL096C	COQ3
YDR204W::chr4_5	YDR204W	COQ4
YML110C::chr00_9	YML110C	COQ5
YGR255C::chr00_17a	YGR255C	COQ6
YLR201C::chr12_3	YLR201C	COQ9
YBL045C::chr2_1	YBL045C	COR1
YNR075W::chr00_6	YNR075W	COS10
YGL263W::chr7_3	YGL263W	COS12
YGR295C::chr00_17b	YGR295C	COS6
YPL132W::chr00_8	YPL132W	COX11
YER141W::chr00_5	YER141W	COX15
YJL003W::chr00_13	YJL003W	COX16
YLL009C::chr12_1	YLL009C	COX17
YGR062C::chr7_4	YGR062C	COX18
YNL052W::chr00_16b	YNL052W	COX5A
YMR256C::chr13_5	YMR256C	COX7
YOR303W::chr00_17b	YOR303W	CPA1
YGR247W::chr00_2	YGR247W	CPD1
YDR155C::chr4_5	YDR155C	CPR1
YML078W::chr13_1b	YML078W	CPR3
YCR069W::chr00_16a	YCR069W	CPR4
YDR304C::chr4_6	YDR304C	CPR5
YLR216C::chr12_3	YLR216C	CPR6
YJL172W::chr00_14	YJL172W	CPS1
YNL130C::chr00_16b	YNL130C	CPT1
YOR100C::chr15_2	YOR100C	CRC1
YDR223W::chr4_5	YDR223W	CRF1
YLR429W::chr00_4	YLR429W	CRN1
YHR146W::chr00_15	YHR146W	CRP1
YLR213C::chr12_3	YLR213C	CRR1
YOR031W::chr15_1	YOR031W	CRS5
YOL063C::chr15_5	YOL063C	CRT10
YGL238W::chr7_3	YGL238W	CSE1
YNR010W::chr14_4	YNR010W	CSE2
YKL049C::chr11_1	YKL049C	CSE4
YLR087C::chr12_2	YLR087C	CSF1
YBR161W::chr2_3	YBR161W	CSH1
YMR025W::chr13_2	YMR025W	CSI1
YMR048W::chr00_11	YMR048W	CSM3
YPL200W::chr16_1	YPL200W	CSM4
YDR179C::chr4_5	YDR179C	CSN9
YPR030W::chr16_4	YPR030W	CSR2
YBR042C::chr2_2	YBR042C	CST26
YDR256C::chr4_6	YDR256C	CTA1
YMR078C::chr00_6	YMR078C	CTF18
YPL018W::chr16_3	YPL018W	CTF19
YLR381W::chr12_5	YLR381W	CTF3
YDR151C::chr4_5	YDR151C	CTH1
YPL181W::chr16_2	YPL181W	CTI6
YKL139W::chr00_14	YKL139W	CTK1
YML112W::chr00_9	YML112W	CTK3
YBR291C::chr00_1	YBR291C	CTP1
YCR054C::chr00_16a	YCR054C	CTR86
YLR286C::chr00_12	YLR286C	CTS1
YDR371W::chr4_7	YDR371W	CTS2
YKL090W::chr11_1	YKL090W	CUE2
YML101C::chr00_9	YML101C	CUE4
YOR042W::chr15_1	YOR042W	CUE5
YGR003W::chr7_3	YGR003W	CUL3
YGL166W::chr7_2	YGL166W	CUP2
YPL177C::chr16_2	YPL177C	CUP9
YMR240C::chr13_5	YMR240C	CUS1
YPL064C::chr16_3	YPL064C	CWC27
YKL096W::chr11_2	YKL096W	CWP1
YKL096W-A::chr00_14	YKL096W-A	CWP2
YML054C::chr13_1b	YML054C	CYB2
YJR048W::chr00_13	YJR048W	CYC1
YOR037W::chr15_1	YOR037W	CYC2
YAL039C::chr1_1	YAL039C	CYC3
YEL039C::chr5_2	YEL039C	CYC7
YBR112C::chr00_16a	YBR112C	CYC8
YDR430C::chr4_7	YDR430C	CYM1
YJL005W::chr00_13	YJL005W	CYR1
YAL012W::chr00_12	YAL012W	CYS3
YKL087C::chr11_1	YKL087C	CYT2
YKR083C::chr00_3	YKR083C	DAD2
YBR233W-A::chr00_20	YBR233W-A	DAD3
YDR320C-A::chr00_20	YDR320C-A	DAD4
YML070W::chr00_9	YML070W	DAK1
YFL053W::chr6_1	YFL053W	DAK2
YIR027C::chr00_3	YIR027C	DAL1
YIR029W::chr00_3	YIR029W	DAL2
YIR032C::chr00_17b	YIR032C	DAL3
YIR028W::chr00_3	YIR028W	DAL4
YIR023W::chr00_17b	YIR023W	DAL81
YNL314W::chr14_1	YNL314W	DAL82
YPL170W::chr16_2	YPL170W	DAP1
YML113W::chr00_9	YML113W	DAT1
YPL119C::chr16_2	YPL119C	DBP1
YNL112W::chr14_3	YNL112W	DBP2
YOR046C::chr15_1	YOR046C	DBP5
YLR276C::chr12_4	YLR276C	DBP9
YLR128W::chr12_3	YLR128W	DCN1
YOL149W::chr00_10	YOL149W	DCP1
YNL118C::chr14_3	YNL118C	DCP2
YLR270W::chr12_4	YLR270W	DCS1
YPL194W::chr00_18	YPL194W	DDC1
YPL194W::chr16_1	YPL194W	DDC1
YER143W::chr00_5	YER143W	DDI1
YMR173W::chr00_11	YMR173W	DDR48
YHR019C::chr8_1	YHR019C	DED81
YFL001W::chr00_17a	YFL001W	DEG1
YAL013W::chr1_1	YAL013W	DEP1
YBR201W::chr2_4	YBR201W	DER1
YOR030W::chr15_1	YOR030W	DFG16
YMR238W::chr13_5	YMR238W	DFG5
YDR411C::chr4_7	YDR411C	DFM1
YOR311C::chr15_4	YOR311C	DGK1
YOR080W::chr15_1	YOR080W	DIA2
YDL024C::chr4_1	YDL024C	DIA3
YHR011W::chr8_1	YHR011W	DIA4
YKR035W-A::chr00_3	YKR035W-A	DID2
YKL002W::chr11_1	YKL002W	DID4
YLR437C::chr00_4	YLR437C	DIF1
YPL049C::chr16_3	YPL049C	DIG1
YDR263C::chr4_6	YDR263C	DIN7
YLR129W::chr12_3	YLR129W	DIP2
YPL265W::chr16_1	YPL265W	DIP5
YDR403W::chr4_7	YDR403W	DIT1
YDR402C::chr4_7	YDR402C	DIT2
YJL065C::chr10_2	YJL065C	DLS1
YMR126C::chr00_9	YMR126C	DLT1
YNL116W::chr14_3	YNL116W	DMA2
YHR164C::chr8_3	YHR164C	DNA2
YER166W::chr00_5	YER166W	DNF1
YLL001W::chr12_1	YLL001W	DNM1
YGL240W::chr7_3	YGL240W	DOC1
YHR044C::chr8_1	YHR044C	DOG1
YNL001W::chr14_4	YNL001W	DOM34
YDR273W::chr4_6	YDR273W	DON1
YER088C::chr00_8	YER088C	DOT6
YPR175W::chr16_5	YPR175W	DPB2
YKL191W::chr11_3	YKL191W	DPH2
YLR172C::chr12_3	YLR172C	DPH5
YPR183W::chr16_5	YPR183W	DPM1
YDR284C::chr4_6	YDR284C	DPP1
YLL018C::chr12_1	YLL018C	DPS1
YKR071C::chr00_3	YKR071C	DRE2
YLL008W::chr12_1	YLL008W	DRS1
YAL026C::chr1_1	YAL026C	DRS2
YGL196W::chr7_3	YGL196W	DSD1
YHR143W::chr8_3	YHR143W	DSE2
YBR007C::chr2_2	YBR007C	DSF2
YMR276W::chr13_5	YMR276W	DSK2
YIR010W::chr9_2	YIR010W	DSN1
YPR017C::chr16_4	YPR017C	DSS4
YBR180W::chr2_4	YBR180W	DTR1
YFR044C::chr00_2	YFR044C	DUG1
YBR281C::chr00_1	YBR281C	DUG2
YNL191W::chr14_2	YNL191W	DUG3
YML080W::chr13_1b	YML080W	DUS1
YLR401C::chr12_5	YLR401C	DUS3
YKR054C::chr11_3	YKR054C	DYN1
YDR424C::chr00_8	YDR424C	DYN2
YMR299C::chr13_5	YMR299C	DYN3
YDR359C::chr4_7	YDR359C	EAF1
YJR082C::chr10_4	YJR082C	EAF6
YNL136W::chr14_3	YNL136W	EAF7
YKL172W::chr11_2	YKL172W	EBP2
YDR206W::chr4_5	YDR206W	EBS1
YLR284C::chr12_4	YLR284C	ECI1
YGR146C::chr7_5	YGR146C	ECL1
YAL059W::chr1_1	YAL059W	ECM1
YHR021W-A::chr00_3	YHR021W-A	ECM12
YBL043W::chr2_1	YBL043W	ECM13
YBL001C::chr2_1	YBL001C	ECM15
YMR128W::chr00_9	YMR128W	ECM16
YBR065C::chr2_2	YBR065C	ECM2
YBL101C::chr2_2	YBL101C	ECM21
YLR228C::chr12_4	YLR228C	ECM22
YPL021W::chr16_3	YPL021W	ECM23
YJL201W::chr10_1	YJL201W	ECM25
YJR106W::chr00_12	YJR106W	ECM27
YHL030W::chr8_1	YHL030W	ECM29
YOR092W::chr15_1	YOR092W	ECM3
YLR436C::chr00_4	YLR436C	ECM30
YBR176W::chr2_4	YBR176W	ECM31
YBR078W::chr2_2	YBR078W	ECM33
YKR076W::chr00_3	YKR076W	ECM4
YMR176W::chr13_4	YMR176W	ECM5
YLR443W::chr00_4	YLR443W	ECM7
YBR076W::chr2_2	YBR076W	ECM8
YKR004C::chr00_14	YKR004C	ECM9
YBL047C::chr2_1	YBL047C	EDE1
YBR033W::chr2_2	YBR033W	EDS1
YPL095C::chr16_2	YPL095C	EEB1
YAL003W::chr1_1	YAL003W	EFB1
YGR272C::chr00_17a	YGR271C-A	EFG1
YBR271W::chr00_1	YBR271W	EFM2
YOR133W::chr15_2	YOR133W	EFT1
YDR385W::chr4_7	YDR385W	EFT2
YPL037C::chr16_3	YPL037C	EGD1
YHR193C::chr00_8	YHR193C	EGD2
YBR177C::chr2_4	YBR177C	EHT1
YMR031C::chr13_2	YMR031C	EIS1
YDR147W::chr4_5	YDR147W	EKI1
YPL046C::chr16_3	YPL046C	ELC1
YKL160W::chr11_2	YKL160W	ELF1
YGR200C::chr7_5	YGR200C	ELP2
YPL086C::chr16_3	YPL086C	ELP3
YKL207W::chr11_3	YKL207W	EMC3
YGL231C::chr7_3	YGL231C	EMC4
YIL027C::chr9_1	YIL027C	EMC5
YLR186W::chr12_3	YLR186W	EMG1
YDR512C::chr00_17a	YDR512C	EMI1
YDR516C::chr4_8	YDR516C	EMI2
YGL200C::chr7_3	YGL200C	EMP24
YLR080W::chr12_2	YLR080W	EMP46
YFL048C::chr6_1	YFL048C	EMP47
YLR083C::chr12_2	YLR083C	EMP70
YNL313C::chr14_1	YNL313C	EMW1
YNL084C::chr14_3	YNL084C	END3
YLR206W::chr12_3	YLR206W	ENT2
YLL038C::chr12_1	YLL038C	ENT4
YDR153C::chr4_5	YDR153C	ENT5
YGR071C::chr7_4	YGR071C	ENV11
YPL236C::chr16_1	YPL236C	ENV7
YNL080C::chr00_16b	YNL080C	EOS1
YFL024C::chr6_1	YFL024C	EPL1
YMR049C::chr00_5	YMR049C	ERB1
YDR414C::chr4_7	YDR414C	ERD1
YBL040C::chr2_1	YBL040C	ERD2
YHR007C::chr00_10	YHR007C	ERG11
YMR208W::chr13_4	YMR208W	ERG12
YMR202W::chr13_4	YMR202W	ERG2
YJL167W::chr10_1	YJL167W	ERG20
YER044C::chr5_3	YER044C	ERG28
YGL012W::chr7_1	YGL012W	ERG4
YMR015C::chr13_2	YMR015C	ERG5
YML008C::chr13_2	YML008C	ERG6
YHR072W::chr8_2	YHR072W	ERG7
YMR220W::chr13_4	YMR220W	ERG8
YHR190W::chr8_3	YHR190W	ERG9
YFR041C::chr00_2	YFR041C	ERJ5
YML130C::chr00_9	YML130C	ERO1
YAR002C-A::chr00_16a	YAR002C-A	ERP1
YAL007C::chr1_1	YAL007C	ERP2
YOR016C::chr15_1	YOR016C	ERP4
YHR110W::chr8_2	YHR110W	ERP5
YCR075C::chr00_16a	YCR075C	ERS1
YGR029W::chr7_4	YGR029W	ERV1
YML012W::chr13_2	YML012W	ERV25
YML067C::chr00_12	YML067C	ERV41
YAL042W::chr1_1	YAL042W	ERV46
YDR363W::chr4_7	YDR363W	ESC2
YDR365C::chr4_7	YDR365C	ESF1
YNR054C::chr00_4	YNR054C	ESF2
YJR017C::chr00_13	YJR017C	ESS1
YLR233C::chr12_4	YLR233C	EST1
YBR026C::chr2_2	YBR026C	ETR1
YOR051C::chr15_1	YOR051C	ETT1
YDR518W::chr4_8	YDR518W	EUG1
YLR300W::chr12_4	YLR300W	EXG1
YDR261C::chr4_6	YDR261C	EXG2
YBR163W::chr2_3	YBR163W	EXO5
YJL085W::chr10_2	YJL085W	EXO70
YBR102C::chr2_3	YBR102C	EXO84
YIL009W::chr9_1	YIL009W	FAA3
YMR246W::chr13_5	YMR246W	FAA4
YDL045C::chr4_1	YDL045C	FAD1
YNL023C::chr14_4	YNL023C	FAP1
YLR238W::chr12_4	YLR238W	FAR10
YNL127W::chr14_3	YNL127W	FAR11
YMR029C::chr13_2	YMR029C	FAR8
YBR041W::chr2_2	YBR041W	FAT1
YER183C::chr00_5	YER183C	FAU1
YLR377C::chr12_5	YLR377C	FBP1
YDR339C::chr4_7	YDR339C	FCF1
YKR016W::chr11_3	YKR016W	FCJ1
YPR062W::chr16_4	YPR062W	FCY1
YER060W::chr5_3	YER060W	FCY21
YER060W-A::chr5_3	YER060W-A	FCY22
YBR101C::chr2_3	YBR101C	FES1
YMR058W::chr00_5	YMR058W	FET3
YBR040W::chr2_2	YBR040W	FIG1
YER032W::chr5_3	YER032W	FIR1
YOR382W::chr15_4	YOR382W	FIT2
YOR383C::chr15_4	YOR383C	FIT3
YIL131C::chr9_2	YIL131C	FKH1
YNL068C::chr00_16b	YNL068C	FKH2
YLR342W::chr12_5	YLR342W	FKS1
YMR306W::chr00_8	YMR306W	FKS3
YAL053W::chr1_1	YAL053W	FLC2
YAR050W::chr00_12	YAR050W	FLO1
YKR102W::chr00_15	YKR102W	FLO10
YER108C::chr00_5	YER109C	FLO8
YER109C::chr00_5	YER109C	FLO8
YBR008C::chr2_2	YBR008C	FLR1
YIL134W::chr9_2	YIL134W	FLX1
YIL098C::chr9_2	YIL098C	FMC1
YDR236C::chr4_5	YDR236C	FMN1
YHR176W::chr8_3	YHR176W	FMO1
YER182W::chr00_5	YER182W	FMP10
YBR269C::chr00_1	YBR269C	FMP21
YBR047W::chr2_2	YBR047W	FMP23
YLR454W::chr00_4	YLR454W	FMP27
YFL046W::chr6_1	YFL046W	FMP32
YJL161W::chr00_14	YJL161W	FMP33
YGR243W::chr00_2	YGR243W	FMP43
YKR049C::chr11_3	YKR049C	FMP46
YER004W::chr5_2	YER004W	FMP52
YMR020W::chr13_2	YMR020W	FMS1
YBL013W::chr2_1	YBL013W	FMT1
YNL256W::chr00_8	YNL256W	FOL1
YGR267C::chr00_3	YGR267C	FOL2
YMR113W::chr00_9	YMR113W	FOL3
YNL135C::chr14_3	YNL135C	FPR1
YML074C::chr00_9	YML074C	FPR3
YLR449W::chr00_4	YLR449W	FPR4
YGL220W::chr7_3	YGL220W	FRA2
YLR214W::chr12_3	YLR214W	FRE1
YKL220C::chr00_14	YKL220C	FRE2
YOR381W::chr15_4	YOR381W	FRE3
YNR060W::chr00_4	YNR060W	FRE4
YOL152W::chr00_17b/chr00_18	YOL152W	FRE7
YLR047C::chr12_2	YLR047C	FRE8
YPL141C::chr16_2	YPL141C	FRK1
YDR373W::chr4_7	YDR373W	FRQ1
YLR060W::chr12_2	YLR060W	FRS1
YFL022C::chr6_1	YFL022C	FRS2
YOR324C::chr15_4	YOR324C	FRT1
YAL028W::chr1_1	YAL028W	FRT2
YHR049W::chr8_2	YHR049W	FSH1
YER145C::chr00_5	YER145C	FTR1
YCR076C::chr00_1	YCR076C	FUB1
YBL042C::chr2_1	YBL042C	FUI1
YPL262W::chr16_1	YPL262W	FUM1
YAL035W::chr1_1	YAL035W	FUN12
YAL008W::chr1_1	YAL008W	FUN14
YAL034C::chr1_1	YAL034C	FUN19
YAL022C::chr1_1	YAL022C	FUN26
YAL019W::chr1_1	YAL019W	FUN30
YBR021W::chr2_2	YBR021W	FUR4
YMR232W::chr13_5	YMR232W	FUS2
YBL016W::chr2_1	YBL016W	FUS3
YIL097W::chr9_1	YIL097W	FYV10
YHR059W::chr00_10	YHR059W	FYV4
YNL133C::chr14_3	YNL133C	FYV6
YLR068W::chr12_2	YLR068W	FYV7
YBR179C::chr2_4	YBR179C	FZO1
YLR088W::chr12_2	YLR088W	GAA1
YOR178C::chr15_2	YOR178C	GAC1
YBR020W::chr00_18	YBR020W	GAL1
YBR020W::chr2_2	YBR020W	GAL1
YLR081W::chr12_2	YLR081W	GAL2
YPL248C::chr16_1	YPL248C	GAL4
YBR018C::chr2_2	YBR018C	GAL7
YML051W::chr13_1b	YML051W	GAL80
YOL132W::chr00_6	YOL132W	GAS4
YFL021W::chr6_1	YFL021W	GAT1
YMR136W::chr00_12	YMR136W	GAT2
YCL011C::chr3_1	YCL011C	GBP2
YNL062C::chr14_3	YNL062C	GCD10
YJL125C::chr00_15	YJL125C	GCD14
YGR083C::chr7_4	YGR083C	GCD2
YDR211W::chr4_5	YDR211W	GCD6
YLR291C::chr12_4	YLR291C	GCD7
YGL195W::chr7_3	YGL195W	GCN1
YDR283C::chr4_6	YDR283C	GCN2
YGR252W::chr00_17a	YGR252W	GCN5
YPL075W::chr16_3	YPL075W	GCR1
YNL199C::chr14_2	YNL199C	GCR2
YAL044C::chr1_1	YAL044C	GCV3
YEL042W::chr5_2	YEL042W	GDA1
YPR184W::chr16_5	YPR184W	GDB1
YAL062W::chr1_1	YAL062W	GDH3
YER136W::chr00_5	YER136W	GDI1
YBR187W::chr2_4	YBR187W	GDT1
YJR040W::chr00_13	YJR040W	GEF1
YAL048C::chr1_1	YAL048C	GEM1
YHR100C::chr8_2	YHR100C	GEP4
YMR255W::chr13_5	YMR255W	GFD1
YDR358W::chr4_7	YDR358W	GGA1
YHR108W::chr8_2	YHR108W	GGA2
YDL198C::chr4_3	YDL198C	GGC1
YDR309C::chr4_6	YDR309C	GIC2
YMR135C::chr00_9	YMR135C	GID8
YEL003W::chr5_2	YEL003W	GIM4
YDR507C::chr4_8	YDR507C	GIN4
YBR045C::chr2_2	YBR045C	GIP1
YER054C::chr5_3	YER054C	GIP2
YAL031C::chr1_1	YAL031C	GIP4
YLR094C::chr12_2	YLR094C	GIS3
YML006C::chr13_2	YML006C	GIS4
YCR098C::chr00_2	YCR098C	GIT1
YEL011W::chr00_8	YEL011W	GLC3
YER107C::chr00_5	YER107C	GLE2
YJL137C::chr00_14	YJL137C	GLG2
YER040W::chr5_3	YER040W	GLN3
YML004C::chr13_2	YML004C	GLO1
YDR272W::chr4_6	YDR272W	GLO2
YOR040W::chr15_1	YOR040W	GLO4
YPL091W::chr16_3	YPL091W	GLR1
YDL171C::chr4_2	YDL171C	GLT1
YDR506C::chr4_8	YDR506C	GMC1
YLR445W::chr00_4	YLR445W	GMC2
YFL017C::chr6_1	YFL017C	GNA1
YHR183W::chr8_3	YHR183W	GND1
YOR320C::chr15_4	YOR320C	GNT1
YMR292W::chr13_5	YMR292W	GOT1
YHR005C::chr00_10	YHR005C	GPA1
YAL056W::chr1_1	YAL056W	GPB2
YGR216C::chr7_5	YGR216C	GPI1
YGL142C::chr7_2	YGL142C	GPI10
YDR302W::chr4_6	YDR302W	GPI11
YJR013W::chr00_13	YJR013W	GPI14
YNL038W::chr14_4	YNL038W	GPI15
YHR188C::chr00_21	YHR188C	GPI16
YDR434W::chr4_7	YDR434W	GPI17
YBR004C::chr2_2	YBR004C	GPI18
YPL076W::chr16_3	YPL076W	GPI2
YDR331W::chr4_6	YDR331W	GPI8
YOL056W::chr15_5	YOL056W	GPM3
YKR067W::chr00_3	YKR067W	GPT2
YHR104W::chr8_2	YHR104W	GRE3
YCL035C::chr00_11	YCL035C	GRX1
YER174C::chr00_5	YER174C	GRX4
YPL059W::chr16_3	YPL059W	GRX5
YBR014C::chr2_2	YBR014C	GRX7
YLR364W::chr12_5	YLR364W	GRX8
YGR032W::chr00_14	YGR032W	GSC2
YML048W::chr13_1b	YML048W	GSF2
YJL101C::chr00_15	YJL101C	GSH1
YLR293C::chr12_4	YLR293C	GSP1
YLR258W::chr12_4	YLR258W	GSY2
YDR221W::chr4_5	YDR221W	GTB1
YML121W::chr00_9	YML121W	GTR1
YGL181W::chr7_2	YGL181W	GTS1
YIR038C::chr00_3	YIR038C	GTT1
YLL060C::chr12_1	YLL060C	GTT2
YPL189W::chr00_11	YPL189W	GUP2
YPL189W::chr16_1	YPL189W	GUP2
YGL245W::chr7_3	YGL245W	GUS1
YHL032C::chr8_1	YHL032C	GUT1
YPR008W::chr00_15	YPR008W	HAA1
YPR005C::chr16_3	YPR005C	HAL1
YJL165C::chr00_14	YJL165C	HAL5
YGL237C::chr7_3	YGL237C	HAP2
YBL021C::chr2_1	YBL021C	HAP3
YMR290C::chr13_5	YMR290C	HAS1
YEL056W::chr5_2	YEL056W	HAT2
YDL223C::chr4_3	YDL223C	HBT1
YJL033W::chr10_2	YJL033W	HCA4
YCR065W::chr00_1	YCR065W	HCM1
YNL021W::chr14_4	YNL021W	HDA1
YPR179C::chr16_5	YPR179C	HDA3
YBL032W::chr2_1	YBL032W	HEK2
YDR232W::chr4_5	YDR232W	HEM1
YDR044W::chr4_3	YDR044W	HEM13
YOR176W::chr15_2	YOR176W	HEM15
YOR278W::chr15_3	YOR278W	HEM4
YMR293C::chr13_5	YMR293C	HER2
YMR110C::chr00_9	YMR110C	HFD1
YGL251C::chr7_3	YGL251C	HFM1
YBR009C::chr2_2	YBR009C	HHF1
YNL030W::chr14_4	YNL030W	HHF2
YPL127C::chr16_2	YPL127C	HHO1
YBR010W::chr2_2	YBR010W	HHT1
YNL031C::chr14_4	YNL031C	HHT2
YDR317W::chr4_6	YDR317W	HIM1
YBL008W::chr2_1	YBL008W	HIR1
YOR038C::chr15_1	YOR038C	HIR2
YER055C::chr5_3	YER055C	HIS1
YFR025C::chr00_15	YFR025C	HIS2
YIL116W::chr9_2	YIL116W	HIS5
YJR055W::chr00_17b	YJR055W	HIT1
YDR420W::chr4_7	YDR420W	HKR1
YDR528W::chr4_8	YDR528W	HLR1
YLR450W::chr00_4	YLR450W	HMG2
YOL095C::chr00_6	YOL095C	HMI1
YBR034C::chr2_2	YBR034C	HMT1
YLR205C::chr12_3	YLR205C	HMX1
YDR305C::chr4_6	YDR305C	HNT2
YDL227C::ctrl_1	YDL227C	HO
YDL227C::ctrl_10	YDL227C	HO
YDL227C::ctrl_11	YDL227C	HO
YDL227C::ctrl_13	YDL227C	HO
YDL227C::ctrl_14	YDL227C	HO
YDL227C::ctrl_15	YDL227C	HO
YDL227C::ctrl_16	YDL227C	HO
YDL227C::ctrl_17	YDL227C	HO
YDL227C::ctrl_18	YDL227C	HO
YDL227C::ctrl_19	YDL227C	HO
YDL227C::ctrl_2	YDL227C	HO
YDL227C::ctrl_20	YDL227C	HO
YDL227C::ctrl_21	YDL227C	HO
YDL227C::ctrl_22	YDL227C	HO
YDL227C::ctrl_23	YDL227C	HO
YDL227C::ctrl_24	YDL227C	HO
YDL227C::ctrl_25	YDL227C	HO
YDL227C::ctrl_26	YDL227C	HO
YDL227C::ctrl_27	YDL227C	HO
YDL227C::ctrl_28	YDL227C	HO
YDL227C::ctrl_29	YDL227C	HO
YDL227C::ctrl_3	YDL227C	HO
YDL227C::ctrl_30	YDL227C	HO
YDL227C::ctrl_31	YDL227C	HO
YDL227C::ctrl_32	YDL227C	HO
YDL227C::ctrl_33	YDL227C	HO
YDL227C::ctrl_34	YDL227C	HO
YDL227C::ctrl_35	YDL227C	HO
YDL227C::ctrl_36	YDL227C	HO
YDL227C::ctrl_37	YDL227C	HO
YDL227C::ctrl_38	YDL227C	HO
YDL227C::ctrl_39	YDL227C	HO
YDL227C::ctrl_4	YDL227C	HO
YDL227C::ctrl_40	YDL227C	HO
YDL227C::ctrl_41	YDL227C	HO
YDL227C::ctrl_42	YDL227C	HO
YDL227C::ctrl_43	YDL227C	HO
YDL227C::ctrl_44	YDL227C	HO
YDL227C::ctrl_45	YDL227C	HO
YDL227C::ctrl_46	YDL227C	HO
YDL227C::ctrl_47	YDL227C	HO
YDL227C::ctrl_48	YDL227C	HO
YDL227C::ctrl_49	YDL227C	HO
YDL227C::ctrl_5	YDL227C	HO
YDL227C::ctrl_50	YDL227C	HO
YDL227C::ctrl_51	YDL227C	HO
YDL227C::ctrl_52	YDL227C	HO
YDL227C::ctrl_53	YDL227C	HO
YDL227C::ctrl_54	YDL227C	HO
YDL227C::ctrl_6	YDL227C	HO
YDL227C::ctrl_7	YDL227C	HO
YDL227C::ctrl_8	YDL227C	HO
YDL227C::ctrl_9	YDL227C	HO
YMR032W::chr13_2	YMR032W	HOF1
YER062C::chr5_3	YER062C	HOR2
YMR251W-A::chr13_5	YMR251W-A	HOR7
YGL194C::chr7_3	YGL194C	HOS2
YPL116W::chr16_2	YPL116W	HOS3
YPR193C::chr16_5	YPR193C	HPA2
YIL110W::chr9_2	YIL110W	HPM1
YDR399W::chr4_7	YDR399W	HPT1
YNL004W::chr14_4	YNL004W	HRB1
YOL013C::chr15_5	YOL013C	HRD1
YOL123W::chr00_6	YOL123W	HRP1
YDR291W::chr4_6	YDR291W	HRQ1
YOL133W::chr00_6	YOL133W	HRT1
YMR186W::chr13_4	YMR186W	HSC82
YHL002W::chr00_10	YHL002W	HSE1
YMR288W::chr13_5	YMR288W	HSH155
YKL138C-A::chr00_20	YKL138C-A	HSK3
YBR133C::chr2_3	YBR133C	HSL7
YOR020C::chr15_1	YOR020C	HSP10
YJL159W::chr10_1	YJL159W	HSP150
YBR072W::chr2_2	YBR072W	HSP26
YDR171W::chr4_5	YDR171W	HSP42
YLR259C::chr12_4	YLR259C	HSP60
YDR258C::chr4_6	YDR258C	HSP78
YOL068C::chr15_5	YOL068C	HST1
YPL015C::chr16_3	YPL015C	HST2
YDR191W::chr4_5	YDR191W	HST4
YDR225W::chr4_5	YDR225W	HTA1
YBL003C::chr2_1	YBL003C	HTA2
YDR224C::chr00_21	YDR224C	HTB1
YBL002W::chr2_1	YBL002W	HTB2
YHR067W::chr00_10	YHR067W	HTD2
YOL012C::chr15_5	YOL012C	HTZ1
YGR268C::chr00_3	YGR268C	HUA1
YOR284W::chr15_3	YOR284W	HUA2
YNR032C-A::chr00_4	YNR032C-A	HUB1
YJR036C::chr00_13	YJR036C	HUL4
YGL168W::chr7_2	YGL168W	HUR1
YPL244C::chr16_1	YPL244C	HUT1
YER039C::chr5_3	YER039C	HVG1
YGL253W::chr7_3	YGL253W	HXK2
YHR094C::chr8_2	YHR094C	HXT1
YFL011W::chr6_1	YFL011W	HXT10
YNR072W::chr00_6	YNR072W	HXT17
YMR011W::chr13_2	YMR011W	HXT2
YDR345C::chr4_7	YDR345C	HXT3
YHR092C::chr8_2	YHR092C	HXT4
YHR096C::chr8_2	YHR096C	HXT5
YJL214W::chr10_1	YJL214W	HXT8
YIR037W::chr00_3	YIR037W	HYR1
YER065C::chr5_3	YER065C	ICL1
YPR006C::chr16_4	YPR006C	ICL2
YER078C::chr00_8	YER078C	ICP55
YLR099C::chr12_2	YLR099C	ICT1
YMR195W::chr13_4	YMR195W	ICY1
YPL250C::chr16_1	YPL250C	ICY2
YPL117C::chr16_2	YPL117C	IDI1
YLR174W::chr12_3	YLR174W	IDP2
YNL009W::chr14_4	YNL009W	IDP3
YFL013C::chr00_17a	YFL013C	IES1
YNL215W::chr14_2	YNL215W	IES2
YLR052W::chr00_8	YLR052W	IES3
YER092W::chr00_8	YER092W	IES5
YEL044W::chr5_2	YEL044W	IES6
YBR159W::chr2_3	YBR159W	IFA38
YLR223C::chr12_3	YLR223C	IFH1
YFR017C::chr6_1	YFR017C	IGD1
YHR132W-A::chr00_17b	YHR132W-A	IGO2
YBL076C::chr2_1	YBL076C	ILS1
YCL009C::chr3_1	YCL009C	ILV6
YLR432W::chr00_4	YLR432W	IMD3
YML056C::chr13_1b	YML056C	IMD4
YJL106W::chr10_2	YJL106W	IME2
YCR046C::chr00_16a	YCR046C	IMG1
YCR071C::chr00_1	YCR071C	IMG2
YLR309C::chr12_4	YLR309C	IMH1
YJL082W::chr10_2	YJL082W	IML2
YBR107C::chr2_3	YBR107C	IML3
YGR031W::chr7_4	YGR031W	IMO32
YMR035W::chr13_2	YMR035W	IMP2
YHR148W::chr8_3	YHR148W	IMP3
YNL075W::chr14_3	YNL075W	IMP4
YHR046C::chr8_2	YHR046C	INM1
YDR287W::chr4_6	YDR287W	INM2
YOL108C::chr00_6	YOL108C	INO4
YGL150C::chr7_2	YGL150C	INO80
YMR204C::chr13_4	YMR204C	INP1
YNL106C::chr00_16b	YNL106C	INP52
YOL065C::chr15_5	YOL065C	INP54
YLR095C::chr12_2	YLR095C	IOC2
YFR013W::chr00_16b	YFR013W	IOC3
YFR013W::chr6_1	YFR013W	IOC3
YMR044W::chr13_2	YMR044W	IOC4
YHR085W::chr8_2	YHR085W	IPI1
YDR315C::chr4_6	YDR315C	IPK1
YPL209C::chr16_1	YPL209C	IPL1
YBR011C::chr2_2	YBR011C	IPP1
YPL242C::chr16_1	YPL242C	IQG1
YBR140C::chr2_3	YBR140C	IRA1
YOR013W::chr15_1	YOR013W	IRC11
YPL017C::chr16_3	YPL017C	IRC15
YLL033W::chr12_1	YLL033W	IRC19
YLR247C::chr12_4	YLR247C	IRC20
YIR036C::chr00_3	YIR036C	IRC24
YDR332W::chr4_6	YDR332W	IRC3
YFR038W::chr00_2	YFR038W	IRC5
YFR043C::chr00_2	YFR043C	IRC6
YHR079C::chr8_2	YHR079C	IRE1
YKR019C::chr00_14	YKR019C	IRS4
YPR067W::chr00_15	YPR067W	ISA2
YER180C::chr00_5	YER180C	ISC10
YER048W-A::chr00_2	YER048W-A	ISD11
YMR081C::chr00_6	YMR081C	ISF1
YPR106W::chr16_5	YPR106W	ISR1
YBR086C::chr2_3	YBR086C	IST2
YOR226C::chr15_3	YOR226C	ISU2
YOL103W::chr00_6	YOL103W	ITR2
YML068W::chr00_12	YML068W	ITT1
YKL032C::chr11_1	YKL032C	IXR1
YOL002C::chr15_5	YOL002C	IZH2
YLR023C::chr12_1	YLR023C	IZH3
YOL101C::chr00_6	YOL101C	IZH4
YLR331C::chr12_5	YLR331C	JIP3
YPR169W::chr16_5	YPR169W	JIP5
YNL227C::chr14_2	YNL227C	JJJ1
YLL057C::chr12_1	YLL057C	JLP1
YBR017C::chr2_2	YBR017C	KAP104
YGL241W::chr7_3	YGL241W	KAP114
YPL125W::chr16_2	YPL125W	KAP120
YMR065W::chr00_6	YMR065W	KAR5
YFR042W::chr00_2	YFR042W	KEG1
YDR367W::chr4_7	YDR367W	KEI1
YGR238C::chr00_14	YGR238C	KEL2
YPL263C::chr16_1	YPL263C	KEL3
YGL203C::chr7_3	YGL203C	KEX1
YNL238W::chr14_2	YNL238W	KEX2
YDR148C::chr4_5	YDR148C	KGD2
YDR122W::chr4_4	YDR122W	KIN1
YLR096W::chr12_2	YLR096W	KIN2
YAR018C::chr1_1	YAR018C	KIN3
YOR233W::chr15_3	YOR233W	KIN4
YCR091W::chr00_2	YCR091W	KIN82
YBL063W::chr2_1	YBL063W	KIP1
YGL216W::chr7_3	YGL216W	KIP3
YKL168C::chr11_2	YKL168C	KKQ8
YDL049C::chr4_1	YDL049C	KNH1
YNL322C::chr14_1	YNL322C	KRE1
YNL132W::chr14_3	YNL132W	KRE33
YNL308C::chr14_1	YNL308C	KRI1
YNL024C-A::chr00_21	YNL024C-A	KSH1
YHR082C::chr8_2	YHR082C	KSP1
YGR040W::chr00_14	YGR040W	KSS1
YBR199W::chr2_4	YBR199W	KTR4
YPL053C::chr16_3	YPL053C	KTR6
YGL079W::chr7_1	YGL079W	KXD1
YJL207C::chr10_1	YJL207C	LAA1
YKL008C::chr11_1	YKL008C	LAC1
YHL003C::chr8_1	YHL003C	LAG1
YNL045W::chr14_4	YNL045W	LAP2
YOR181W::chr15_2	YOR181W	LAS17
YJL062W::chr10_2	YJL062W	LAS21
YNL071W::chr00_16b	YNL071W	LAT1
YLR260W::chr12_4	YLR260W	LCB5
YDR499W::chr4_8	YDR499W	LCD1
YPL056C::chr16_3	YPL056C	LCL1
YLR104W::chr12_2	YLR104W	LCL2
YBL006C::chr2_1	YBL006C	LDB7
YPL213W::chr16_1	YPL213W	LEA1
YPL054W::chr16_3	YPL054W	LEE1
YOR123C::chr15_2	YOR123C	LEO1
YLR451W::chr12_3	YLR451W	LEU3
YNL104C::chr00_16b	YNL104C	LEU4
YOR108W::chr15_2	YOR108W	LEU9
YPL055C::chr16_3	YPL055C	LGE1
YKL073W::chr11_1	YKL073W	LHS1
YHR156C::chr8_3	YHR156C	LIN1
YMR298W::chr13_5	YMR298W	LIP1
YLR239C::chr12_4	YLR239C	LIP2
YOR196C::chr15_3	YOR196C	LIP5
YKL205W::chr11_3	YKL205W	LOS1
YKL183W::chr11_2	YKL183W	LOT5
YFR024C-A::chr6_1	YFR024C-A	LSB3
YJL100W::chr10_2	YJL100W	LSB6
YOR142W::chr15_2	YOR142W	LSC1
YGR244C::chr00_2	YGR244C	LSC2
YGL099W::chr7_2	YGL099W	LSG1
YBL026W::chr2_1	YBL026W	LSM2
YDR378C::chr4_7	YDR378C	LSM6
YNL147W::chr00_18	YNL147W	LSM7
YPL004C::chr00_17b	YPL004C	LSP1
YNL006W::chr14_4	YNL006W	LST8
YAL024C::chr00_17a	YAL024C	LTE1
YNL268W::chr00_18	YNL268W	LYP1
YNL268W::chr14_1	YNL268W	LYP1
YIL094C::chr9_1	YIL094C	LYS12
YDR034C::chr4_3	YDR034C	LYS14
YBR115C::chr2_3	YBR115C	LYS2
YGL154C::chr7_2	YGL154C	LYS5
YNR050C::chr00_4	YNR050C	LYS9
YMR021C::chr13_2	YMR021C	MAC1
YJL030W::chr10_2	YJL030W	MAD2
YJL013C::chr00_13	YJL013C	MAD3
YAL025C::chr1_1	YAL025C	MAK16
YBR142W::chr2_3	YBR142W	MAK5
YGR288W::chr00_3	YGR288W	MAL13
YBR299W::chr00_17a	YBR299W	MAL32
YOL060C::chr15_5	YOL060C	MAM3
YBL091C::chr2_1	YBL091C	MAP2
YLR163C::chr12_3	YLR163C	MAS1
YHR024C::chr8_1	YHR024C	MAS2
YBR185C::chr2_4	YBR185C	MBA1
YJL199C::chr10_1	YJL199C	MBB1
YOR298C-A::chr00_11	YOR298C-A	MBF1
YDL054C::chr4_1	YDL054C	MCH1
YKL221W::chr11_3	YKL221W	MCH2
YOR306C::chr15_4/chr00_8	YOR306C	MCH5
YNL307C::chr14_1	YNL307C	MCK1
YMR043W::chr13_2	YMR043W	MCM1
YIL150C::chr9_2	YIL150C	MCM10
YBL023C::chr2_1	YBL023C	MCM2
YDR318W::chr4_6	YDR318W	MCM21
YPR019W::chr16_4	YPR019W	MCM4
YGL201C::chr7_3	YGL201C	MCM6
YJR024C::chr00_13	YJR024C	MDE1
YKL085W::chr11_1	YKL085W	MDH1
YFL016C::chr00_17a	YFL016C	MDJ1
YLR188W::chr12_3	YLR188W	MDL1
YML104C::chr00_9	YML104C	MDM1
YAL010C::chr1_1	YAL010C	MDM10
YLR368W::chr12_5	YLR368W	MDM30
YGL219C::chr00_14	YGL219C	MDM34
YKL053C-A::chr00_17b	YKL053C-A	MDM35
YOL027C::chr15_5	YOL027C	MDM38
YLR106C::chr12_2	YLR106C	MDN1
YGL197W::chr7_3	YGL197W	MDS3
YOL111C::chr00_6	YOL111C	MDY2
YBR136W::chr2_3	YBR136W	MEC1
YLR288C::chr12_4	YLR288C	MEC3
YMR112C::chr00_9	YMR112C	MED11
YHR058C::chr00_10	YHR058C	MED6
YBR193C::chr2_4	YBR193C	MED8
YJL102W::chr10_2	YJL102W	MEF2
YKR007W::chr11_3	YKR007W	MEH1
YPL121C::chr16_2	YPL121C	MEI5
YOR351C::chr15_4	YOR351C	MEK1
YNL142W::chr00_17b	YNL142W	MEP2
YPR138C::chr16_5	YPR138C	MEP3
YNL210W::chr14_2	YNL210W	MER1
YKR069W::chr00_3	YKR069W	MET1
YFR030W::chr00_15	YFR030W	MET10
YLR303W::chr12_4	YLR303W	MET17
YNL277W::chr14_1	YNL277W	MET2
YOL064C::chr15_5	YOL064C	MET22
YIR017C::chr00_3	YIR017C	MET28
YJR010W::chr00_13	YJR010W	MET3
YPL038W::chr16_3	YPL038W	MET31
YDR253C::chr4_6	YDR253C	MET32
YNL103W::chr00_18	YNL103W	MET4
YER091C::chr00_8	YER091C	MET6
YPL187W::chr16_2	YPL187W	MF(ALPHA)1
YDR461W::chr00_17a	YDR461W	MFA1
YNL145W::chr14_3	YNL145W	MFA2
YDR219C::chr4_5	YDR219C	MFB1
YPL060W::chr16_3	YPL060W	MFM1
YML062C::chr13_1b	YML062C	MFT1
YGR249W::chr00_2	YGR249W	MGA1
YIR033W::chr00_3	YIR033W	MGA2
YMR115W::chr00_9	YMR115W	MGR3
YJR008W::chr00_13	YJR008W	MHO1
YJL042W::chr00_15	YJL042W	MHP1
YDR296W::chr4_6	YDR296W	MHR1
YLL062C::chr12_1	YLL062C	MHT1
YKL195W::chr00_14	YKL195W	MIA40
YMR002W::chr13_2	YMR002W	MIC17
YLR332W::chr12_5	YLR332W	MID2
YKL089W::chr11_1	YKL089W	MIF2
YGL209W::chr7_3	YGL209W	MIG2
YMR036C::chr13_2	YMR036C	MIH1
YLR099W-A::chr00_21	YLR099W-A	MIM2
YBR084W::chr2_3	YBR084W	MIS1
YEL007W::chr5_2	YEL007W	MIT1
YDR144C::chr4_4	YDR144C	MKC7
YPL140C::chr16_2	YPL140C	MKK2
YNL076W::chr00_16b	YNL076W	MKS1
YNL085W::chr00_16b	YNL085W	MKT1
YNL074C::chr00_16b	YNL074C	MLF3
YLR035C::chr00_8	YLR035C	MLH2
YKR095W::chr00_15	YKR095W	MLP1
YIL149C::chr9_2	YIL149C	MLP2
YNL117W::chr14_3	YNL117W	MLS1
YIL051C::chr9_1	YIL051C	MMF1
YLR190W::chr12_3	YLR190W	MMR1
YPR164W::chr16_5	YPR164W	MMS1
YGL087C::chr7_1	YGL087C	MMS2
YBR098W::chr2_3	YBR098W	MMS4
YBR100W::chr2_3/chr00_16a	YBR098W	MMS4
YIR025W::chr00_3	YIR025W	MND2
YHR204W::chr8_3	YHR204W	MNL1
YDR245W::chr4_6	YDR245W	MNN10
YBR015C::chr2_2	YBR015C	MNN2
YKL200C::chr11_3	YKL201C	MNN4
YPL050C::chr16_3	YPL050C	MNN9
YKL064W::chr11_1	YKL064W	MNR2
YGL257C::chr7_3	YGL257C	MNT2
YIL014W::chr9_1	YIL014W	MNT3
YNR059W::chr00_4	YNR059W	MNT4
YIL106W::chr9_2	YIL106W	MOB1
YBL049W::chr2_1	YBL049W	MOH1
YGR235C::chr00_2	YGR235C	MOS2
YPL082C::chr16_3	YPL082C	MOT1
YMR070W::chr00_6	YMR070W	MOT3
YHR162W::chr00_8	YHR162W	MPC2
YOL088C::chr00_6	YOL088C	MPD2
YKL059C::chr11_1	YKL059C	MPE1
YIR002C::chr9_2	YIR002C	MPH1
YJL066C::chr10_2	YJL066C	MPM1
YJR002W::chr00_13	YJR002W	MPP10
YNR024W::chr14_4	YNR024W	MPP6
YPR112C::chr16_5	YPR112C	MRD1
YGL143C::chr7_2	YGL143C	MRF1
YOR201C::chr15_3	YOR201C	MRM1
YGL136C::chr7_2	YGL136C	MRM2
YPL184C::chr16_2	YPL184C	MRN1
YDR347W::chr4_7	YDR347W	MRP1
YKL003C::chr11_1	YKL003C	MRP17
YDR405W::chr4_7	YDR405W	MRP20
YBL090W::chr2_1	YBL090W	MRP21
YKL167C::chr11_2	YKL167C	MRP49
YPL118W::chr16_2	YPL118W	MRP51
YKL142W::chr11_2	YKL142W	MRP8
YNL284C::chr00_18	YNL284C	MRPL10
YKR006C::chr11_3	YKR006C	MRPL13
YLR312W-A::chr12_4	YLR312W-A	MRPL15
YBL038W::chr2_1	YBL038W	MRPL16
YKR085C::chr00_15	YKR085C	MRPL20
YGR076C::chr7_4	YGR076C	MRPL25
YBR282W::chr00_1	YBR282W	MRPL27
YMR024W::chr13_2	YMR024W	MRPL3
YCR003W::chr3_1	YCR003W	MRPL32
YMR286W::chr13_5	YMR286W	MRPL33
YDR322W::chr4_6	YDR322W	MRPL35
YML009C::chr00_4	YML009C	MRPL39
YML009C::chr13_2	YML009C	MRPL39
YPL173W::chr16_2	YPL173W	MRPL40
YMR225C::chr13_4	YMR225C	MRPL44
YJL096W::chr10_2	YJL096W	MRPL49
YHR147C::chr8_3	YHR147C	MRPL6
YDR237W::chr4_5	YDR237W	MRPL7
YPL013C::chr16_3	YPL013C	MRPS16
YMR188C::chr13_4	YMR188C	MRPS17
YDR337W::chr4_6	YDR337W	MRPS28
YMR158W::chr00_8	YMR158W	MRPS8
YBR146W::chr2_3	YBR146W	MRPS9
YIR021W::chr00_3	YIR021W	MRS1
YKR052C::chr11_3	YKR052C	MRS4
YKR077W::chr00_3	YKR077W	MSA2
YNL293W::chr14_1	YNL293W	MSB3
YOL112W::chr00_6	YOL112W	MSB4
YML128C::chr00_9	YML128C	MSC1
YDR205W::chr00_14	YDR205W	MSC2
YLR219W::chr12_3	YLR219W	MSC3
YOR354C::chr15_4	YOR354C	MSC6
YPL104W::chr16_2	YPL104W	MSD1
YOL033W::chr15_5	YOL033W	MSE1
YPR047W::chr16_4	YPR047W	MSF1
YOL090W::chr00_6	YOL090W	MSH2
YBR195C::chr2_4	YBR195C	MSI1
YNL073W::chr00_16b	YNL073W	MSK1
YLR116W::chr12_2	YLR116W	MSL5
YOL116W::chr00_6	YOL116W	MSN1
YKL062W::chr11_1	YKL062W	MSN4
YDR335W::chr4_6	YDR335W	MSN5
YNR049C::chr14_4	YNR049C	MSO1
YGR028W::chr00_14	YGR028W	MSP1
YHR091C::chr8_2	YHR091C	MSR1
YMR023C::chr13_2	YMR023C	MSS1
YMR164C::chr13_4	YMR164C	MSS11
YDR194C::chr4_5	YDR194C	MSS116
YDR208W::chr4_5	YDR208W	MSS4
YKL194C::chr00_14	YKL194C	MST1
YDR268W::chr4_6	YDR268W	MSW1
YGL226W::chr7_3	YGL226W	MTC3
YHR151C::chr8_3	YHR151C	MTC6
YKR080W::chr00_3	YKR080W	MTD1
YMR228W::chr13_4	YMR228W	MTF1
YDL044C::chr4_1	YDL044C	MTF2
YMR097C::chr00_9	YMR097C	MTG1
YHR168W::chr00_8	YHR168W	MTG2
YDR277C::chr4_6	YDR277C	MTH1
YGR257C::chr00_17a	YGR257C	MTM1
YGL236C::chr7_3	YGL236C	MTO1
YNL063W::chr14_3	YNL063W	MTQ1
YDR140W::chr4_4	YDR140W	MTQ2
YGR158C::chr7_5	YGR158C	MTR3
YAL034W-A::chr1_1	YAL034W-A	MTW1
YIR019C::chr00_3	YIR019C	MUC1
YBR119W::chr2_3	YBR119W	MUD1
YPL070W::chr16_3	YPL070W	MUK1
YBR057C::chr2_2	YBR057C	MUM2
YDR386W::chr4_7	YDR386W	MUS81
YGR206W::chr7_5	YGR206W	MVB12
YNR043W::chr14_4	YNR043W	MVD1
YHR023W::chr00_10	YHR023W	MYO1
YAL029C::chr1_1	YAL029C	MYO4
YMR109W::chr00_9	YMR109W	MYO5
YPL190C::chr16_1	YPL190C	NAB3
YNL124W::chr14_3	YNL124W	NAF1
YLR382C::chr00_11	YLR382C	NAM2
YMR080C::chr00_6	YMR080C	NAM7
YNL137C::chr00_16b	YNL137C	NAM9
YPL126W::chr16_2	YPL126W	NAN1
YNL240C::chr14_2	YNL240C	NAR1
YDL040C::chr4_1	YDL040C	NAT1
YPR131C::chr16_5	YPR131C	NAT3
YMR069W::chr00_6	YMR069W	NAT4
YOL070C::chr15_5	YOL070C	NBA1
YDR162C::chr4_5	YDR162C	NBP2
YDR397C::chr4_7	YDR397C	NCB2
YPR149W::chr16_5	YPR149W	NCE102
YBL024W::chr2_1	YBL024W	NCL1
YHR042W::chr8_1	YHR042W	NCP1
YNL119W::chr00_16b	YNL119W	NCS2
YGL211W::chr7_3	YGL211W	NCS6
YML031W::chr00_12	YML031W	NDC1
YMR145C::chr13_4	YMR145C	NDE1
YML120C::chr00_9	YML120C	NDI1
YLR254C::chr12_4	YLR254C	NDL1
YLR265C::chr12_4	YLR265C	NEJ1
YHR004C::chr00_10	YHR004C	NEM1
YPL226W::chr16_1	YPL226W	NEW1
YKR103W::chr00_4	YKR103W	NFT1
YDR176W::chr4_5	YDR176W	NGG1
YLR138W::chr12_3	YLR138W	NHA1
YBR090C-A::chr2_3	YBR089C-A	NHP6B
YGL221C::chr7_3	YGL221C	NIF3
YMR309C::chr13_5	YMR309C	NIP1
YPL174C::chr16_2	YPL174C	NIP100
YNL078W::chr00_16b	YNL078W	NIS1
YIL164C::chr9_2	YIL164C	NIT1
YJL126W::chr10_2	YJL126W	NIT2
YLR351C::chr12_5	YLR351C	NIT3
YDR383C::chr4_7	YDR383C	NKP1
YLR315W::chr12_4	YLR315W	NKP2
YNL123W::chr14_3	YNL123W	NMA111
YHR077C::chr8_2	YHR077C	NMD2
YHR170W::chr00_8	YHR170W	NMD3
YLR363C::chr12_5	YLR363C	NMD4
YLR195C::chr12_3	YLR195C	NMT1
YLR285W::chr12_4	YLR285W	NNT1
YLR002C::chr12_1	YLR002C	NOC3
YNR053C::chr00_4	YNR053C	NOG2
YHR072W-A::chr00_20	YHR072W-A	NOP10
YNL110C::chr14_3	YNL110C	NOP15
YER002W::chr5_2	YER002W	NOP16
YNL061W::chr00_16b	YNL061W	NOP2
YPL043W::chr16_3	YPL043W	NOP4
YLR197W::chr12_3	YLR197W	NOP56
YOR310C::chr15_4	YOR310C	NOP58
YDL213C::chr4_3	YDL213C	NOP6
YJL010C::chr00_13	YJL010C	NOP9
YIL038C::chr9_1	YIL038C	NOT3
YDR432W::chr4_7	YDR432W	NPL3
YBR170C::chr2_3	YBR170C	NPL4
YMR091C::chr00_6	YMR091C	NPL6
YEL062W::chr5_2	YEL062W	NPR2
YHL023C::chr8_1	YHL023C	NPR3
YGR043C::chr7_4	YGR043C	NQM1
YBR066C::chr2_2	YBR066C	NRG2
YNL129W::chr14_3	YNL129W	NRK1
YNR009W::chr14_4	YNR009W	NRM1
YOR071C::chr15_1	YOR071C	NRT1
YLR007W::chr12_1	YLR007W	NSE1
YDR288W::chr4_6	YDR288W	NSE3
YML023C::chr00_11	YML023C	NSE5
YML023C::chr13_2	YML023C	NSE5
YHR133C::chr8_2	YHR133C	NSG1
YNL156C::chr14_2	YNL156C	NSG2
YNL091W::chr00_16b	YNL091W	NST1
YBR188C::chr2_4	YBR188C	NTC20
YML059C::chr13_1b	YML059C	NTE1
YER009W::chr5_2	YER009W	NTF2
YAL015C::chr1_1	YAL015C	NTG1
YOL043C::chr15_5	YOL043C	NTG2
YPR031W::chr00_15	YPR031W	NTO1
YOL069W::chr15_5	YOL069W	NUF2
YKL068W::chr11_1	YKL068W	NUP100
YMR047C::chr00_16b	YMR047C	NUP116
YMR047C::chr13_2	YMR047C	NUP116
YKL057C::chr11_1	YKL057C	NUP120
YIL115C::chr9_2	YIL115C	NUP159
YBL079W::chr2_1	YBL079W	NUP170
YML103C::chr00_9	YML103C	NUP188
YJL039C::chr10_2	YJL039C	NUP192
YLR335W::chr12_5	YLR335W	NUP2
YDR192C::chr4_5	YDR192C	NUP42
YAR002W::chr1_1	YAR002W	NUP60
YJL061W::chr10_2	YJL061W	NUP82
YDL193W::chr4_3	YDL193W	NUS1
YGL151W::chr7_2	YGL151W	NUT1
YPR168W::chr16_5	YPR168W	NUT2
YHR195W::chr8_3	YHR195W	NVJ1
YPR091C::chr00_18	YPR091C	NVJ2
YLR093C::chr12_2	YLR093C	NYV1
YKL120W::chr11_2	YKL120W	OAC1
YAL051W::chr1_1	YAL051W	OAF1
YPL052W::chr16_3	YPL052W	OAZ1
YNL099C::chr00_16b	YNL099C	OCA1
YNL056W::chr00_16b	YNL056W	OCA2
YCR095C::chr00_14	YCR095C	OCA4
YKL134C::chr11_2	YKL134C	OCT1
YPL134C::chr00_8	YPL134C	ODC1
YML060W::chr13_1b	YML060W	OGG1
YGR179C::chr7_5	YGR179C	OKP1
YBR025C::chr2_2	YBR025C	OLA1
YIL136W::chr9_2	YIL136W	OM45
YKR087C::chr00_4	YKR087C	OMA1
YDR316W::chr4_6	YDR316W	OMS1
YHL020C::chr8_1	YHL020C	OPI1
YOL032W::chr15_5	YOL032W	OPI10
YPR044C::chr16_4	YPR044C	OPI11
YDR360W::chr4_7	YDR360W	OPI7
YKR035C::chr11_3	YKR035C	OPI8
YLR338W::chr12_5	YLR338W	OPI9
YPR194C::chr16_5	YPR194C	OPT2
YBR129C::chr2_3	YBR129C	OPY1
YML065W::chr13_1b	YML065W	ORC1
YBR060C::chr2_2	YBR060C	ORC2
YLL004W::chr12_1	YLL004W	ORC3
YGR038W::chr00_14	YGR038W	ORM1
YJR051W::chr00_13	YJR051W	OSM1
YJL002C::chr00_13	YJL002C	OST1
YOR085W::chr15_1	YOR085W	OST3
YML019W::chr13_2	YML019W	OST6
YLR054C::chr12_2	YLR054C	OSW2
YFL044C::chr6_1	YFL044C	OTU1
YHL013C::chr8_1	YHL013C	OTU2
YER154W::chr00_5	YER154W	OXA1
YKL215C::chr00_14	YKL215C	OXP1
YHR179W::chr8_3	YHR179W	OYE2
YPL171C::chr16_2	YPL171C	OYE3
YDR071C::chr00_11	YDR071C	PAA1
YER165W::chr00_5	YER165W	PAB1
YER007W::chr5_2	YER007W	PAC2
YBR279W::chr00_1	YBR279W	PAF1
YDR348C::chr4_7	YDR348C	PAL1
YDR251W::chr4_6	YDR251W	PAM1
YOL115W::chr00_6	YOL115W	PAP2
YGL261C::chr7_3	YGL261C	PAU11
YHL046C::chr8_1	YHL046C	PAU13
YLR037C::chr00_8	YLR037C	PAU23
YAR020C::chr1_1	YAR020C	PAU7
YAL068C::chr1_1	YAL068C	PAU8
YLR199C::chr12_3	YLR199C	PBA1
YCL052C::chr3_1	YCL052C	PBN1
YGR178C::chr7_5	YGR178C	PBP1
YBR094W::chr2_3	YBR094W	PBY1
YBR295W::chr00_1	YBR295W	PCA1
YLR151C::chr12_3	YLR151C	PCD1
YBR186W::chr2_4	YBR186W	PCH2
YKR097W::chr00_4	YKR097W	PCK1
YER059W::chr5_3	YER059W	PCL6
YLR044C::chr12_2	YLR044C	PDC1
YLR134W::chr12_3	YLR134W	PDC5
YGR087C::chr7_4	YGR087C	PDC6
YGL248W::chr7_3	YGL248W	PDE1
YOR360C::chr15_4	YOR360C	PDE2
YPR002W::chr16_3	YPR002W	PDH1
YIL013C::chr9_1	YIL013C	PDR11
YDR406W::chr4_7	YDR406W	PDR15
YNL264C::chr14_1	YNL264C	PDR17
YBL005W::chr2_1	YBL005W	PDR3
YLR266C::chr12_4	YLR266C	PDR8
YGR193C::chr7_5	YGR193C	PDX1
YBR035C::chr2_2	YBR035C	PDX3
YER149C::chr00_5	YER149C	PEA2
YBL017C::chr2_1	YBL017C	PEP1
YLR148W::chr12_3	YLR148W	PEP3
YDR323C::chr4_6	YDR323C	PEP7
YJL053W::chr10_2	YJL053W	PEP8
YKR046C::chr00_14	YKR046C	PET10
YMR257C::chr13_5	YMR257C	PET111
YBL080C::chr2_1	YBL080C	PET112
YER058W::chr5_3	YER058W	PET117
YER153C::chr00_5	YER153C	PET122
YJL023C::chr00_13	YJL023C	PET130
YJR034W::chr00_13	YJR034W	PET191
YLR067C::chr12_2	YLR067C	PET309
YNR045W::chr14_4	YNR045W	PET494
YNL003C::chr14_4	YNL003C	PET8
YBL030C::chr2_1	YBL030C	PET9
YDR265W::chr4_6	YDR265W	PEX10
YMR026C::chr13_2	YMR026C	PEX12
YOL044W::chr15_5	YOL044W	PEX15
YHR160C::chr8_3	YHR160C	PEX18
YAL055W::chr1_1	YAL055W	PEX22
YHR150W::chr8_3	YHR150W	PEX28
YDR329C::chr4_6	YDR329C	PEX3
YLR324W::chr12_5	YLR324W	PEX30
YGR004W::chr7_3	YGR004W	PEX31
YGR133W::chr7_5	YGR133W	PEX4
YDR244W::chr4_6	YDR244W	PEX5
YNL329C::chr14_1	YNL329C	PEX6
YNL326C::chr14_1	YNL326C	PFA3
YGR240C::chr00_2	YGR240C	PFK1
YMR205C::chr13_4	YMR205C	PFK2
YIL107C::chr9_2	YIL107C	PFK26
YOL136C::chr00_6	YOL136C	PFK27
YHR185C::chr00_10	YHR185C	PFS1
YNL317W::chr14_1	YNL317W	PFS2
YOR122C::chr15_2	YOR122C	PFY1
YNL158W::chr14_2	YNL158W	PGA1
YML125C::chr00_9	YML125C	PGA3
YPL206C::chr16_1	YPL206C	PGC1
YBR196C::chr2_4	YBR196C	PGI1
YKL127W::chr11_2	YKL127W	PGM1
YMR105C::chr00_9	YMR105C	PGM2
YGR231C::chr00_2	YGR231C	PHB2
YDR281C::chr4_6	YDR281C	PHM6
YOL084W::chr15_5	YOL084W	PHM7
YNL097C::chr00_16b	YNL097C	PHO23
YBR092C::chr2_3	YBR092C	PHO3
YFR034C::chr00_2	YFR034C	PHO4
YBR093C::chr2_3	YBR093C	PHO5
YGR233C::chr00_2	YGR233C	PHO81
YML123C::chr00_9	YML123C	PHO84
YPL031C::chr16_3	YPL031C	PHO85
YCR037C::chr00_1	YCR037C	PHO87
YBR106W::chr2_3	YBR106W	PHO88
YBR296C::chr00_1	YBR296C	PHO89
YNR013C::chr14_4	YNR013C	PHO91
YOR386W::chr15_5	YOR386W	PHR1
YDR313C::chr4_6	YDR313C	PIB1
YER053C::chr5_3	YER053C	PIC2
YML061C::chr13_1b	YML061C	PIF1
YGR086C::chr00_14	YGR086C	PIL1
YBL022C::chr2_1	YBL022C	PIM1
YOR104W::chr15_2	YOR104W	PIN2
YPR154W::chr16_5	YPR154W	PIN3
YBL051C::chr2_1	YBL051C	PIN4
YKL164C::chr11_2	YKL164C	PIR1
YKL163W::chr11_2	YKL163W	PIR3
YPR113W::chr16_5	YPR113W	PIS1
YDR490C::chr4_8	YDR490C	PKH1
YIL042C::chr9_1	YIL042C	PKP1
YMR123W::chr00_9	YMR123W	PKR1
YMR008C::chr13_2	YMR008C	PLB1
YMR006C::chr13_2	YMR006C	PLB2
YOL011W::chr15_5	YOL011W	PLB3
YDR501W::chr4_8	YDR501W	PLM2
YDR183W::chr4_5	YDR183W	PLP1
YPL036W::chr00_17b	YPL036W	PMA2
YGL006W::chr7_1	YGL006W	PMC1
YER132C::chr00_5	YER132C	PMD1
YML107C::chr00_9	YML107C	PML39
YCR024C-A::chr00_1	YCR024C-A	PMP1
YDR276C::chr4_6	YDR276C	PMP3
YGL167C::chr7_2	YGL167C	PMR1
YNL082W::chr00_16b	YNL082W	PMS1
YAL023C::chr1_1	YAL023C	PMT2
YOR321W::chr15_4	YOR321W	PMT3
YPL096W::chr16_2	YPL096W	PNG1
YBR022W::chr2_2	YBR022W	POA1
YNL102W::chr14_3	YNL102W	POL1
YBL035C::chr2_1	YBL035C	POL12
YJR006W::chr00_13	YJR006W	POL31
YMR129W::chr00_9	YMR129W	POM152
YNL221C::chr14_2	YNL221C	POP1
YNL282W::chr14_1	YNL282W	POP3
YAL033W::chr1_1	YAL033W	POP5
YGR030C::chr7_4	YGR030C	POP6
YBR167C::chr2_3	YBR167C	POP7
YBL018C::chr2_1	YBL018C	POP8
YNL055C::chr00_18	YNL055C	POR1
YIL114C::chr9_2	YIL114C	POR2
YPL188W::chr16_1	YPL188W	POS5
YGL205W::chr7_3	YGL205W	POX1
YNR032W::chr14_4	YNR032W	PPG1
YDL188C::chr4_2	YDL188C	PPH22
YDR435C::chr4_7	YDR435C	PPM1
YLR014C::chr12_1	YLR014C	PPR1
YGR123C::chr7_5	YGR123C	PPT1
YPL148C::chr00_11	YPL148C	PPT2
YML016C::chr13_2	YML016C	PPZ1
YDR436W::chr4_7	YDR436W	PPZ2
YEL060C::chr5_2	YEL060C	PRB1
YMR297W::chr13_5	YMR297W	PRC1
YER012W::chr5_2	YER012W	PRE1
YPR103W::chr16_4	YPR103W	PRE2
YJL001W::chr00_13	YJL001W	PRE3
YFR050C::chr00_2	YFR050C	PRE4
YMR314W::chr00_8	YMR314W	PRE5
YOL038W::chr15_5	YOL038W	PRE6
YBL041W::chr2_1	YBL041W	PRE7
YML092C::chr00_9	YML092C	PRE8
YIL095W::chr9_1	YIL095W	PRK1
YPL192C::chr16_1	YPL192C	PRM3
YPL156C::chr16_2	YPL156C	PRM4
YIL117C::chr9_2	YIL117C	PRM5
YML047C::chr00_11	YML047C	PRM6
YAR031W::chr1_1	YAR031W	PRM9
YOR323C::chr15_4	YOR323C	PRO2
YKR086W::chr00_4	YKR086W	PRP16
YGR006W::chr7_3	YGR006W	PRP18
YJL203W::chr10_1	YJL203W	PRP21
YDR243C::chr4_6	YDR243C	PRP28
YGR075C::chr7_4	YGR075C	PRP38
YML046W::chr00_12	YML046W	PRP39
YPR178W::chr16_5	YPR178W	PRP4
YDR235W::chr4_5	YDR235W	PRP42
YAL032C::chr1_1	YAL032C	PRP45
YPL151C::chr16_2	YPL151C	PRP46
YBR055C::chr2_2	YBR055C	PRP6
YHL011C::chr00_10	YHL011C	PRS3
YBL068W::chr2_1	YBL068W	PRS4
YBL064C::chr2_1	YBL064C	PRX1
YKR013W::chr11_3	YKR013W	PRY2
YMR308C::chr13_5	YMR308C	PSE1
YOL054W::chr15_5	YOL054W	PSH1
YAL017W::chr1_1	YAL017W	PSK1
YML017W::chr13_2	YML017W	PSP2
YDR055W::chr4_4	YDR055W	PST1
YNL201C::chr14_2	YNL201C	PSY2
YBL046W::chr2_1	YBL046W	PSY4
YAL043C::chr1_1	YAL043C	PTA1
YBL056W::chr2_1	YBL056W	PTC3
YBR125C::chr00_16a	YBR125C	PTC4
YHR189W::chr8_3	YHR189W	PTH1
YBL057C::chr2_1	YBL057C	PTH2
YKL198C::chr11_3	YKL198C	PTK1
YKL199C::chr11_3	YKL198C	PTK1
YJR059W::chr00_13	YJR059W	PTK2
YDL230W::chr4_3	YDL230W	PTP1
YFR029W::chr00_15	YFR029W	PTR3
YGR253C::chr00_3	YGR253C	PUP2
YER094C::chr00_8	YER094C	PUP3
YLR165C::chr12_3	YLR165C	PUS5
YLR142W::chr12_3	YLR142W	PUT1
YLR196W::chr12_3	YLR196W	PWP1
YCR057C::chr00_16a	YCR057C	PWP2
YKL188C::chr11_2	YKL188C	PXA2
YGR280C::chr00_3	YGR280C	PXR1
YOR347C::chr15_4	YOR347C	PYK2
YPR186C::chr16_5	YPR186C	PZF1
YJL166W::chr10_1	YJL166W	QCR8
YIL121W::chr9_2	YIL121W	QDR2
YBR043C::chr2_2	YBR043C	QDR3
YPL022W::chr16_3	YPL022W	RAD1
YML095C::chr00_9	YML095C	RAD10
YMR201C::chr13_4	YMR201C	RAD14
YBR114W::chr2_3	YBR114W	RAD16
YOR368W::chr15_4	YOR368W	RAD17
YCR066W::chr00_1	YCR066W	RAD18
YER173W::chr00_5	YER173W	RAD24
YKL113C::chr11_2	YKL113C	RAD27
YER171W::chr00_5	YER171W	RAD3
YDR419W::chr4_7	YDR419W	RAD30
YML011C::chr13_2	YML011C	RAD33
YDR314C::chr4_6	YDR314C	RAD34
YLR032W::chr00_8	YLR032W	RAD5
YER095W::chr00_8	YER095W	RAD51
YML032C::chr13_2	YML032C	RAD52
YGL163C::chr7_2	YGL163C	RAD54
YDR217C::chr4_5	YDR217C	RAD9
YGL246C::chr7_3	YGL246C	RAI1
YNL098C::chr14_3	YNL098C	RAS2
YJR033C::chr00_13	YJR033C	RAV1
YLR084C::chr12_2	YLR084C	RAX2
YPL246C::chr16_1	YPL246C	RBD2
YAL036C::chr1_1	YAL036C	RBG1
YCR036W::chr00_1	YCR036W	RBK1
YDL189W::chr4_2	YDL189W	RBS1
YML030W::chr13_2	YML030W	RCF1
YGL158W::chr7_2	YGL158W	RCK1
YLR248W::chr12_4	YLR248W	RCK2
YOL010W::chr15_5	YOL010W	RCL1
YMR075W::chr00_6	YMR075W	RCO1
YBR005W::chr2_2	YBR005W	RCR1
YBR073W::chr2_2	YBR073W	RDH54
YOR380W::chr15_4	YOR380W	RDR1
YCR106W::chr00_2	YCR106W	RDS1
YBR049C::chr2_2	YBR049C	REB1
YLR329W::chr12_5	YLR329W	REC102
YHR157W::chr8_3	YHR157W	REC104
YMR133W::chr00_9	YMR133W	REC114
YJL217W::chr10_1	YJL217W	REE1
YDR195W::chr4_5	YDR195W	REF2
YBR050C::chr2_2	YBR050C	REG2
YBR002C::chr2_2	YBR002C	RER2
YFR051C::chr00_2	YFR051C	RET2
YPL010W::chr16_3	YPL010W	RET3
YLR059C::chr12_2	YLR059C	REX2
YLR107W::chr12_2	YLR107W	REX3
YOL080C::chr15_5	YOL080C	REX4
YAR007C::chr1_1	YAR007C	RFA1
YNL312W::chr14_1	YNL312W	RFA2
YOL094C::chr00_6	YOL094C	RFC4
YBR087W::chr2_3/chr00_16a	YBR087W	RFC5
YBR052C::chr2_2	YBR052C	RFS1
YBL020W::chr2_1	YBL020W	RFT1
YLR073C::chr12_2	YLR073C	RFU1
YLR176C::chr12_3	YLR176C	RFX1
YDR379W::chr4_7	YDR379W	RGA2
YPR115W::chr16_5	YPR115W	RGC1
YER067W::chr5_3	YER067W	RGI1
YPL066W::chr16_3	YPL066W	RGL1
YLR071C::chr12_2	YLR071C	RGR1
YOR107W::chr15_2	YOR107W	RGS2
YCR027C::chr00_1	YCR027C	RHB1
YPR165W::chr16_5	YPR165W	RHO1
YNL090W::chr00_16b	YNL090W	RHO2
YKR055W::chr11_3	YKR055W	RHO4
YBL033C::chr2_1	YBL033C	RIB1
YOL066C::chr15_5	YOL066C	RIB2
YBR153W::chr2_3	YBR153W	RIB7
YLR039C::chr00_8	YLR039C	RIC1
YBR275C::chr00_16a	YBR275C	RIF1
YLR453C::chr00_4	YLR453C	RIF2
YMR139W::chr00_11	YMR139W	RIM11
YBR192W::chr2_4	YBR192W	RIM2
YNL294C::chr14_1	YNL294C	RIM21
YHL024W::chr00_8	YHL024W	RIM4
YMR063W::chr00_6	YMR063W	RIM9
YHR197W::chr8_3	YHR197W	RIX1
YLL034C::chr12_1	YLL034C	RIX7
YPL208W::chr16_1	YPL208W	RKM1
YBR030W::chr2_2	YBR030W	RKM3
YDR257C::chr4_6	YDR257C	RKM4
YLR137W::chr12_3	YLR137W	RKM5
YMR247C::chr13_5	YMR247C	RKR1
YPR018W::chr16_4	YPR018W	RLF2
YLR009W::chr12_1	YLR009W	RLP24
YDL001W::chr4_1	YDL001W	RMD1
YDR255C::chr4_6	YDR255C	RMD5
YGL107C::chr7_2	YGL107C	RMD9
YPL024W::chr16_3	YPL024W	RMI1
YLR145W::chr12_3	YLR145W	RMP1
YGL250W::chr7_3	YGL250W	RMR1
YDR465C::chr4_8	YDR465C	RMT2
YMR061W::chr00_6	YMR061W	RNA14
YNL072W::chr00_16b	YNL072W	RNH201
YDR279W::chr4_6	YDR279W	RNH202
YLR154C::chr12_3	YLR154C	RNH203
YGR276C::chr00_17a	YGR276C	RNH70
YER070W::chr5_3	YER070W	RNR1
YMR239C::chr13_5	YMR239C	RNT1
YGL144C::chr7_2	YGL144C	ROG1
YGL171W::chr7_2	YGL171W	ROK1
YGR070W::chr7_4	YGR070W	ROM1
YLR371W::chr12_5	YLR371W	ROM2
YPR065W::chr16_4	YPR065W	ROX1
YBL093C::chr2_1	YBL093C	ROX3
YJR063W::chr00_13	YJR063W	RPA12
YDR156W::chr4_5	YDR156W	RPA14
YJL148W::chr10_1	YJL148W	RPA34
YOL005C::chr15_5	YOL005C	RPB11
YIL021W::chr9_1	YIL021W	RPB3
YJL140W::chr00_14	YJL140W	RPB4
YBR154C::chr2_3	YBR154C	RPB5
YDR404C::chr4_7	YDR404C	RPB7
YHR143W-A::chr8_3	YHR143W-A	RPC10
YDR045C::chr4_3	YDR045C	RPC11
YJL011C::chr00_13	YJL011C	RPC17
YNL113W::chr14_3	YNL113W	RPC19
YNR003C::chr14_4	YNR003C	RPC34
YPR110C::chr16_5	YPR110C	RPC40
YPR190C::chr16_5	YPR190C	RPC82
YNL330C::chr14_1	YNL330C	RPD3
YJL121C::chr10_2	YJL121C	RPE1
YHR088W::chr8_2	YHR088W	RPF1
YKR081C::chr00_3	YKR081C	RPF2
YBR079C::chr2_2	YBR079C	RPG1
YLR075W::chr12_2	YLR075W	RPL10
YGR085C::chr7_4	YGR085C	RPL11B
YDR418W::chr4_7	YDR418W	RPL12B
YMR142C::chr00_8	YMR142C	RPL13B
YLR029C::chr12_1	YLR029C	RPL15A
YNL069C::chr00_18	YNL069C	RPL16B
YNL069C::chr14_3	YNL069C	RPL16B
YOL120C::chr00_6	YOL120C	RPL18A
YBR084C-A::chr00_16a	YBR084C-A	RPL19A
YBL027W::chr2_1	YBL027W	RPL19B
YGL135W::chr7_2	YGL135W	RPL1B
YMR242C::chr13_5	YMR242C	RPL20A
YOR312C::chr15_4	YOR312C	RPL20B
YBR191W::chr2_4	YBR191W	RPL21A
YPL079W::chr16_3	YPL079W	RPL21B
YLR061W::chr12_2	YLR061W	RPL22A
YBL087C::chr2_1	YBL087C	RPL23A
YOL127W::chr00_6	YOL127W	RPL25
YLR344W::chr12_5	YLR344W	RPL26A
YGR034W::chr7_4	YGR034W	RPL26B
YFR032C-A::chr00_2	YFR032C-A	RPL29
YGL030W::chr7_1	YGL030W	RPL30
YBL092W::chr2_1	YBL092W	RPL32
YPL143W::chr16_2	YPL143W	RPL33A
YMR194W::chr13_4	YMR194W	RPL36A
YLR185W::chr12_3	YLR185W	RPL37A
YDR500C::chr00_17a	YDR500C	RPL37B
YJL189W::chr00_14	YJL189W	RPL39
YDL133C-A::chr00_14	YDL133C-A	RPL41B
YNL162W::chr14_2	YNL162W	RPL42A
YPR043W::chr00_15	YPR043W	RPL43A
YBR031W::chr2_2	YBR031W	RPL4A
YPL131W::chr00_8	YPL131W	RPL5
YGL147C::chr7_2	YGL147C	RPL9A
YNL067W::chr00_16b	YNL067W	RPL9B
YML091C::chr00_9	YML091C	RPM2
YHR200W::chr8_3	YHR200W	RPN10
YLR421C::chr12_5	YLR421C	RPN13
YGL004C::chr7_1	YGL004C	RPN14
YPR108W::chr16_5	YPR108W	RPN7
YDR427W::chr00_11	YDR427W	RPN9
YDR427W::chr4_7	YDR427W	RPN9
YPR187W::chr16_5	YPR187W	RPO26
YFL036W::chr6_1	YFL036W	RPO41
YDR382W::chr4_7	YDR382W	RPP2B
YLR048W::chr12_2	YLR048W	RPS0B
YBR048W::chr2_2	YBR048W	RPS11B
YOR369C::chr15_4	YOR369C	RPS12
YJL191W::chr00_14	YJL191W	RPS14B
YOL040C::chr15_5	YOL040C	RPS15
YMR143W::chr13_4	YMR143W	RPS16A
YDL083C::chr4_1	YDL083C	RPS16B
YML024W::chr13_2	YML024W	RPS17A
YDR450W::chr4_8	YDR450W	RPS18A
YML026C::chr13_2	YML026C	RPS18B
YOL121C::chr00_6	YOL121C	RPS19A
YLR441C::chr00_4	YLR441C	RPS1A
YML063W::chr13_1b	YML063W	RPS1B
YJL136C::chr00_14	YJL136C	RPS21B
YJL190C::chr10_1	YJL190C	RPS22A
YGR027C::chr7_4	YGR027C	RPS25A
YLR333C::chr12_5	YLR333C	RPS25B
YER131W::chr00_5	YER131W	RPS26B
YKL156W::chr11_2	YKL156W	RPS27A
YLR264W::chr12_4	YLR264W	RPS28B
YLR287C-A::chr12_4	YLR287C-A	RPS30A
YOR182C::chr15_2	YOR182C	RPS30B
YLR167W::chr12_3	YLR167W	RPS31
YHR203C::chr8_3	YHR203C	RPS4B
YBR181C::chr2_4	YBR181C	RPS6B
YOR096W::chr00_8	YOR096W	RPS7A
YBL072C::chr2_1	YBL072C	RPS8A
YBR189W::chr00_14	YBR189W	RPS9B
YBR189W::chr2_4	YBR189W	RPS9B
YDR394W::chr4_7	YDR394W	RPT3
YOR117W::chr15_2	YOR117W	RPT5
YOR305W::chr15_4	YOR305W	RRG7
YPR116W::chr16_5	YPR116W	RRG8
YOL117W::chr00_6	YOL117W	RRI2
YBL025W::chr2_1	YBL025W	RRN10
YML043C::chr13_1b	YML043C	RRN11
YLR141W::chr12_3	YLR141W	RRN5
YBL014C::chr2_1	YBL014C	RRN6
YJL025W::chr00_13	YJL025W	RRN7
YPL012W::chr16_3	YPL012W	RRP12
YDR412W::chr4_7	YDR412W	RRP17
YHR069C::chr8_2	YHR069C	RRP4
YCR035C::chr00_1	YCR035C	RRP43
YDR280W::chr4_6	YDR280W	RRP45
YOR001W::chr15_1	YOR001W	RRP6
YCL031C::chr3_1	YCL031C	RRP7
YOR294W::chr15_4	YOR294W	RRS1
YBL048W::chr2_1	YBL048W	RRT1
YCR045C::chr00_1	YCR045C	RRT12
YER066W::chr00_10	YER066W	RRT13
YNL105W::chr00_16b	YNL105W	RRT16
YOL048C::chr15_5	YOL048C	RRT8
YPL193W::chr16_1	YPL193W	RSA1
YLR221C::chr12_3	YLR221C	RSA3
YKR008W::chr11_3	YKR008W	RSC4
YLR033W::chr00_8	YLR033W	RSC58
YML127W::chr00_9	YML127W	RSC9
YML049C::chr13_1b	YML049C	RSE1
YMR030W::chr13_2	YMR030W	RSF1
YER050C::chr5_3	YER050C	RSM18
YNR037C::chr14_4	YNR037C	RSM19
YDR175C::chr4_5	YDR175C	RSM24
YGR215W::chr7_5	YGR215W	RSM27
YMR266W::chr13_5	YMR266W	RSN1
YGR152C::chr7_5	YGR152C	RSR1
YBR147W::chr2_3	YBR147W	RTC2
YOR118W::chr15_2	YOR118W	RTC5
YPL183W-A::chr00_11	YPL183W-A	RTC6
YPL183W-A::chr00_18	YPL183W-A	RTC6
YGL244W::chr7_3	YGL244W	RTF1
YOL067C::chr15_5	YOL067C	RTG1
YGL252C::chr7_3	YGL252C	RTG2
YBL103C::chr2_2	YBL103C	RTG3
YDL025C::chr4_1	YDL025C	RTK1
YDR233C::chr4_5	YDR233C	RTN1
YER139C::chr00_5	YER139C	RTR1
YDR066C::chr4_4	YDR066C	RTR2
YOR077W::chr15_1	YOR077W	RTS2
YPL183C::chr00_11	YPL183C	RTT10
YJL047C::chr10_2	YJL047C	RTT101
YGR275W::chr00_3	YGR275W	RTT102
YER104W::chr00_5	YER104W	RTT105
YHR154W::chr8_3	YHR154W	RTT107
YLL002W::chr12_1	YLL002W	RTT109
YDR190C::chr4_5	YDR190C	RVB1
YPL235W::chr16_1	YPL235W	RVB2
YDR388W::chr4_7	YDR388W	RVS167
YBR095C::chr2_3	YBR095C	RXT2
YDR159W::chr4_5	YDR159W	SAC3
YDR129C::chr4_4	YDR129C	SAC6
YDR389W::chr4_7	YDR389W	SAC7
YGL175C::chr7_2	YGL175C	SAE2
YHR079C-B::chr00_3	YHR079C-A	SAE3
YBR280C::chr00_16a	YBR280C	SAF1
YJR004C::chr00_13	YJR004C	SAG1
YER043C::chr5_3	YER043C	SAH1
YER129W::chr00_5	YER129W	SAK1
YNL083W::chr00_16b	YNL083W	SAL1
YLR180W::chr12_3	YLR180W	SAM1
YPL274W::chr16_1	YPL274W	SAM3
YHR083W::chr8_2	YHR083W	SAM35
YNL026W::chr14_4	YNL026W	SAM50
YFR040W::chr00_2	YFR040W	SAP155
YJL098W::chr10_2	YJL098W	SAP185
YKR028W::chr00_14	YKR028W	SAP190
YGL229C::chr7_3	YGL229C	SAP4
YMR127C::chr00_9	YMR127C	SAS2
YBL052C::chr2_1	YBL052C	SAS3
YDR181C::chr4_5	YDR181C	SAS4
YAL027W::chr1_1	YAL027W	SAW1
YGR263C::chr00_3	YGR263C	SAY1
YDR351W::chr4_7	YDR351W	SBE2
YHR103W::chr8_2	YHR103W	SBE22
YDR180W::chr4_5	YDR180W	SCC2
YER147C::chr00_5	YER147C	SCC4
YGR049W::chr7_4	YGR049W	SCM4
YBR037C::chr2_2	YBR037C	SCO1
YBR024W::chr2_2	YBR024W	SCO2
YOR367W::chr15_4	YOR367W	SCP1
YBL091C-A::chr00_1	YBL091C-A	SCS22
YMR272C::chr13_5	YMR272C	SCS7
YBL011W::chr2_1	YBL011W	SCT1
YGR245C::chr00_2	YGR245C	SDA1
YKL148C::chr11_2	YKL148C	SDH1
YLL041C::chr12_1	YLL041C	SDH2
YKL193C::chr11_3	YKL193C	SDS22
YBR214W::chr2_4	YBR214W	SDS24
YGL224C::chr7_3	YGL224C	SDT1
YBL104C::chr2_2	YBL104C	SEA4
YDR164C::chr4_5	YDR164C	SEC1
YLR166C::chr12_3	YLR166C	SEC10
YIR022W::chr00_3	YIR022W	SEC11
YLR208W::chr12_3	YLR208W	SEC13
YGL233W::chr7_3	YGL233W	SEC15
YPL085W::chr16_3	YPL085W	SEC16
YBL050W::chr2_1	YBL050W	SEC17
YBR080C::chr00_16a	YBR080C	SEC18
YNL272C::chr14_1	YNL272C	SEC2
YNL287W::chr00_8	YNL287W	SEC21
YLR268W::chr12_4	YLR268W	SEC22
YPR181C::chr16_5	YPR181C	SEC23
YIL109C::chr9_2	YIL109C	SEC24
YDR238C::chr4_5	YDR238C	SEC26
YIL076W::chr9_1	YIL076W	SEC28
YER008C::chr5_2	YER008C	SEC3
YLR440C::chr00_4	YLR440C	SEC39
YFL005W::chr00_17a	YFL005W	SEC4
YDR166C::chr4_5	YDR166C	SEC5
YFL045C::chr6_1	YFL045C	SEC53
YMR013C::chr13_2	YMR013C	SEC59
YPL094C::chr16_2	YPL094C	SEC62
YBR171W::chr2_3	YBR171W	SEC66
YCR067C::chr00_16a	YCR067C	SED4
YBL066C::chr2_1	YBL066C	SEF1
YMR086W::chr00_6	YMR086W	SEG1
YDR363W-A::chr00_2	YDR363W-A	SEM1
YLR430W::chr00_4	YLR430W	SEN1
YMR059W::chr00_6	YMR059W	SEN15
YAR008W::chr1_1	YAR008W	SEN34
YPL083C::chr16_3	YPL083C	SEN54
YAL067C::chr1_1	YAL067C	SEO1
YJL168C::chr10_1	YJL168C	SET2
YKR029C::chr00_14	YKR029C	SET3
YHR207C::chr8_3	YHR207C	SET5
YDL168W::chr4_2	YDL168W	SFA1
[truncated: 1,206 more rows]

## Sheet: flight
Strain	ORF	Gene
YMR072W::chr00_6	YMR072W	ABF2
YGR037C::chr7_4	YGR037C	ACB1
YDR448W::chr4_8	YDR448W	ADA2
YKL206C::chr11_3	YKL206C	ADD66
YDR408C::chr4_7	YDR408C	ADE8
YOL086C::chr00_6	YOL086C	ADH1
YDR226W::chr4_5	YDR226W	ADK1
YNR044W::chr14_4	YNR044W	AGA1
YCR082W::chr00_1	YCR082W	AHC2
YLR109W::chr12_2	YLR109W	AHP1
YNR074C::chr00_6	YNR074C	AIF1
YGL160W::chr7_2	YGL160W	AIM14
YBR108W::chr2_3	YBR108W	AIM3
YNL100W::chr00_16b	YNL100W	AIM37
YMR169C::chr00_4	YMR169C	ALD3
YPL061W::chr16_3	YPL061W	ALD6
YBR110W::chr2_3	YBR110W	ALG1
YNL219C::chr14_2	YNL219C	ALG9
YML086C::chr13_1b	YML086C	ALO1
YKR021W::chr11_3	YKR021W	ALY1
YDR242W::chr4_6	YDR242W	AMD2
YBL019W::chr2_1	YBL019W	APN2
YDL192W::chr4_3	YDL192W	ARF1
YMR062C::chr00_6	YMR062C	ARG7
YGL148W::chr7_2	YGL148W	ARO2
YLR085C::chr12_2	YLR085C	ARP6
YMR033W::chr00_11	YMR033W	ARP9
YPR200C::chr16_5	YPR200C	ARR2
YGR068C::chr7_4	YGR068C	ART5
YBL069W::chr2_1	YBL069W	AST1
YPR049C::chr16_4	YPR049C	ATG11
YBR128C::chr2_3	YBR128C	ATG14
YOL082W::chr15_5	YOL082W	ATG19
YIL146C::chr9_2	YIL146C	ATG32
YLR356W::chr12_5	YLR356W	ATG33
YNL223W::chr14_2	YNL223W	ATG4
YPR026W::chr00_15	YPR026W	ATH1
YDR377W::chr4_7	YDR377W	ATP17
YMR098C::chr00_9	YMR098C	ATP25
YDR298C::chr4_6	YDR298C	ATP5
YFL010W-A::chr00_17a	YFL010W-A	AUA1
YMR068W::chr00_6	YMR068W	AVO2
YHR040W::chr8_1	YHR040W	BCD1
YDR375C::chr4_7	YDR375C	BCS1
YKR068C::chr00_3	YKR068C	BET3
YJR053W::chr00_13	YJR053W	BFA1
YPL217C::chr00_18	YPL217C	BMS1
YLR231C::chr12_4	YLR231C	BNA5
YNL042W::chr14_4	YNL042W	BOP3
YFL025C::chr6_1	YFL025C	BST1
YDR252W::chr4_6	YDR252W	BTT1
YMR014W::chr13_2	YMR014W	BUD22
YCR047C::chr00_16a	YCR047C	BUD23
YER014C-A::chr5_3	YER014C-A	BUD25
YFL023W::chr6_1	YFL023W	BUD27
YLR062C::chr12_2	YLR062C	BUD28
YGR041W::chr7_4	YGR041W	BUD9
YLR226W::chr12_3	YLR226W	BUR2
YML102W::chr00_9	YML102W	CAC2
YNL278W::chr14_1	YNL278W	CAF120
YKR036C::chr00_14	YKR036C	CAF4
YNL161W::chr14_2	YNL161W	CBK1
YDL069C::chr4_1	YDL069C	CBS1
YER168C::chr00_5	YER168C	CCA1
YLR220W::chr12_3	YLR220W	CCC1
YDR270W::chr4_6	YDR270W	CCC2
YDR188W::chr4_5	YDR188W	CCT6
YJL008C::chr00_13	YJL008C	CCT8
YLR307W::chr12_4	YLR307W	CDA1
YDR182W::chr4_5	YDR182W	CDC1
YHR166C::chr8_3	YHR166C	CDC23
YBR160W::chr2_3	YBR160W	CDC28
YBR160W_AS::shawn	YBR160W	CDC28
YDR168W::chr4_5	YDR168W	CDC37
YDR364C::chr4_7	YDR364C	CDC40
YMR001C::chr13_2	YMR001C	CDC5
YBR029C::chr2_2	YBR029C	CDS1
YDR301W::chr4_6	YDR301W	CFT1
YLR115W::chr12_2	YLR115W	CFT2
YBR274W::chr00_1	YBR274W	CHK1
YPL008W::chr16_3	YPL008W	CHL1
YGR157W::chr7_5	YGR157W	CHO2
YBR038W::chr2_2	YBR038W	CHS2
YLR330W::chr12_5	YLR330W	CHS5
YDR267C::chr4_6	YDR267C	CIA1
YMR138W::chr00_11	YMR138W	CIN4
YBR135W::chr2_3	YBR135W	CKS1
YGR110W::chr00_14	YGR110W	CLD1
YLR117C::chr12_2	YLR117C	CLF1
YKL137W::chr11_2	YKL137W	CMC1
YDR357C::chr4_7	YDR357C	CNL1
YBR155W::chr2_3	YBR155W	CNS1
YLL050C::chr12_1	YLL050C	COF1
YER157W::chr00_5	YER157W	COG3
YNL051W::chr00_16b	YNL051W	COG5
YDL145C::chr4_2	YDL145C	COP1
YBL045C::chr2_1	YBL045C	COR1
YJL003W::chr00_13	YJL003W	COX16
YGR062C::chr7_4	YGR062C	COX18
YMR256C::chr13_5	YMR256C	COX7
YDR155C::chr4_5	YDR155C	CPR1
YDR223W::chr4_5	YDR223W	CRF1
YLR429W::chr00_4	YLR429W	CRN1
YOR031W::chr15_1	YOR031W	CRS5
YLR087C::chr12_2	YLR087C	CSF1
YMR048W::chr00_11	YMR048W	CSM3
YDR179C::chr4_5	YDR179C	CSN9
YMR078C::chr00_6	YMR078C	CTF18
YPL018W::chr16_3	YPL018W	CTF19
YKL139W::chr00_14	YKL139W	CTK1
YML112W::chr00_9	YML112W	CTK3
YPL064C::chr16_3	YPL064C	CWC27
YKL096W-A::chr00_14	YKL096W-A	CWP2
YJR048W::chr00_13	YJR048W	CYC1
YKL087C::chr11_1	YKL087C	CYT2
YBR233W-A::chr00_20	YBR233W-A	DAD3
YDR320C-A::chr00_20	YDR320C-A	DAD4
YIR027C::chr00_3	YIR027C	DAL1
YML113W::chr00_9	YML113W	DAT1
YNL112W::chr14_3	YNL112W	DBP2
YOL149W::chr00_10	YOL149W	DCP1
YLR270W::chr12_4	YLR270W	DCS1
YHR019C::chr8_1	YHR019C	DED81
YFL001W::chr00_17a	YFL001W	DEG1
YBR201W::chr2_4	YBR201W	DER1
YHR011W::chr8_1	YHR011W	DIA4
YPL265W::chr16_1	YPL265W	DIP5
YJL065C::chr10_2	YJL065C	DLS1
YPR175W::chr16_5	YPR175W	DPB2
YKL191W::chr11_3	YKL191W	DPH2
YDR284C::chr4_6	YDR284C	DPP1
YKR071C::chr00_3	YKR071C	DRE2
YGL196W::chr7_3	YGL196W	DSD1
YLR405W::chr12_5	YLR405W	DUS4
YKL172W::chr11_2	YKL172W	EBP2
YDR206W::chr4_5	YDR206W	EBS1
YHR021W-A::chr00_3	YHR021W-A	ECM12
YBL043W::chr2_1	YBL043W	ECM13
YBL001C::chr2_1	YBL001C	ECM15
YLR443W::chr00_4	YLR443W	ECM7
YBL047C::chr2_1	YBL047C	EDE1
YBR033W::chr2_2	YBR033W	EDS1
YGR272C::chr00_17a	YGR271C-A	EFG1
YOR133W::chr15_2	YOR133W	EFT1
YDR385W::chr4_7	YDR385W	EFT2
YPL037C::chr16_3	YPL037C	EGD1
YHR193C::chr00_8	YHR193C	EGD2
YPL046C::chr16_3	YPL046C	ELC1
YDR516C::chr4_8	YDR516C	EMI2
YGL200C::chr7_3	YGL200C	EMP24
YFL048C::chr6_1	YFL048C	EMP47
YNL313C::chr14_1	YNL313C	EMW1
YLR206W::chr12_3	YLR206W	ENT2
YGL012W::chr7_1	YGL012W	ERG4
YHR072W::chr8_2	YHR072W	ERG7
YGR029W::chr7_4	YGR029W	ERV1
YDR363W::chr4_7	YDR363W	ESC2
YJR017C::chr00_13	YJR017C	ESS1
YBR026C::chr2_2	YBR026C	ETR1
YDR518W::chr4_8	YDR518W	EUG1
YBR102C::chr2_3	YBR102C	EXO84
YBR041W::chr2_2	YBR041W	FAT1
YER183C::chr00_5	YER183C	FAU1
YDR339C::chr4_7	YDR339C	FCF1
YPR062W::chr16_4	YPR062W	FCY1
YER060W-A::chr5_3	YER060W-A	FCY22
YBR101C::chr2_3	YBR101C	FES1
YIL131C::chr9_2	YIL131C	FKH1
YDR236C::chr4_5	YDR236C	FMN1
YHR176W::chr8_3	YHR176W	FMO1
YNL135C::chr14_3	YNL135C	FPR1
YLR214W::chr12_3	YLR214W	FRE1
YDR373W::chr4_7	YDR373W	FRQ1
YHR059W::chr00_10	YHR059W	FYV4
YNL133C::chr14_3	YNL133C	FYV6
YBR020W::chr2_2	YBR020W	GAL1
YLR081W::chr12_2	YLR081W	GAL2
YJL125C::chr00_15	YJL125C	GCD14
YDR283C::chr4_6	YDR283C	GCN2
YAL044C::chr1_1	YAL044C	GCV3
YPL110C::chr16_2	YPL110C	GDE1
YBR187W::chr2_4	YBR187W	GDT1
YDR358W::chr4_7	YDR358W	GGA1
YHR108W::chr8_2	YHR108W	GGA2
YDL198C::chr4_3	YDL198C	GGC1
YDR309C::chr4_6	YDR309C	GIC2
YDR507C::chr4_8	YDR507C	GIN4
YEL011W::chr00_8	YEL011W	GLC3
YDL207W::chr4_3	YDL207W	GLE1
YDR506C::chr4_8	YDR506C	GMC1
YFL017C::chr6_1	YFL017C	GNA1
YHR183W::chr8_3	YHR183W	GND1
YOR320C::chr15_4	YOR320C	GNT1
YGL142C::chr7_2	YGL142C	GPI10
YJR013W::chr00_13	YJR013W	GPI14
YHR188C::chr00_21	YHR188C	GPI16
YBR004C::chr2_2	YBR004C	GPI18
YBR014C::chr2_2	YBR014C	GRX7
YLR364W::chr12_5	YLR364W	GRX8
YLR258W::chr12_4	YLR258W	GSY2
YPL189W::chr16_1	YPL189W	GUP2
YGL245W::chr7_3	YGL245W	GUS1
YPR005C::chr16_3	YPR005C	HAL1
YBL021C::chr2_1	YBL021C	HAP3
YMR290C::chr13_5	YMR290C	HAS1
YDL223C::chr4_3	YDL223C	HBT1
YNL021W::chr14_4	YNL021W	HDA1
YBL032W::chr2_1	YBL032W	HEK2
YDR232W::chr4_5	YDR232W	HEM1
YBR034C::chr2_2	YBR034C	HMT1
YDL227C::ctrl_1	YDL227C	HO
YDL227C::ctrl_10	YDL227C	HO
YDL227C::ctrl_11	YDL227C	HO
YDL227C::ctrl_13	YDL227C	HO
YDL227C::ctrl_14	YDL227C	HO
YDL227C::ctrl_15	YDL227C	HO
YDL227C::ctrl_16	YDL227C	HO
YDL227C::ctrl_17	YDL227C	HO
YDL227C::ctrl_18	YDL227C	HO
YDL227C::ctrl_19	YDL227C	HO
YDL227C::ctrl_2	YDL227C	HO
YDL227C::ctrl_20	YDL227C	HO
YDL227C::ctrl_21	YDL227C	HO
YDL227C::ctrl_22	YDL227C	HO
YDL227C::ctrl_23	YDL227C	HO
YDL227C::ctrl_24	YDL227C	HO
YDL227C::ctrl_25	YDL227C	HO
YDL227C::ctrl_26	YDL227C	HO
YDL227C::ctrl_27	YDL227C	HO
YDL227C::ctrl_28	YDL227C	HO
YDL227C::ctrl_29	YDL227C	HO
YDL227C::ctrl_3	YDL227C	HO
YDL227C::ctrl_30	YDL227C	HO
YDL227C::ctrl_31	YDL227C	HO
YDL227C::ctrl_32	YDL227C	HO
YDL227C::ctrl_33	YDL227C	HO
YDL227C::ctrl_34	YDL227C	HO
YDL227C::ctrl_35	YDL227C	HO
YDL227C::ctrl_36	YDL227C	HO
YDL227C::ctrl_37	YDL227C	HO
YDL227C::ctrl_38	YDL227C	HO
YDL227C::ctrl_39	YDL227C	HO
YDL227C::ctrl_4	YDL227C	HO
YDL227C::ctrl_40	YDL227C	HO
YDL227C::ctrl_41	YDL227C	HO
YDL227C::ctrl_42	YDL227C	HO
YDL227C::ctrl_43	YDL227C	HO
YDL227C::ctrl_44	YDL227C	HO
YDL227C::ctrl_45	YDL227C	HO
YDL227C::ctrl_46	YDL227C	HO
YDL227C::ctrl_47	YDL227C	HO
YDL227C::ctrl_48	YDL227C	HO
YDL227C::ctrl_49	YDL227C	HO
YDL227C::ctrl_5	YDL227C	HO
YDL227C::ctrl_50	YDL227C	HO
YDL227C::ctrl_51	YDL227C	HO
YDL227C::ctrl_52	YDL227C	HO
YDL227C::ctrl_53	YDL227C	HO
YDL227C::ctrl_54	YDL227C	HO
YDL227C::ctrl_6	YDL227C	HO
YDL227C::ctrl_7	YDL227C	HO
YDL227C::ctrl_8	YDL227C	HO
YDL227C::ctrl_9	YDL227C	HO
YMR032W::chr13_2	YMR032W	HOF1
YKL138C-A::chr00_20	YKL138C-A	HSK3
YBR133C::chr2_3	YBR133C	HSL7
YPL015C::chr16_3	YPL015C	HST2
YDR225W::chr4_5	YDR225W	HTA1
YBL003C::chr2_1	YBL003C	HTA2
YDR224C::chr00_21	YDR224C	HTB1
YBL002W::chr2_1	YBL002W	HTB2
YGR268C::chr00_3	YGR268C	HUA1
YJR036C::chr00_13	YJR036C	HUL4
YPL244C::chr16_1	YPL244C	HUT1
YER039C::chr5_3	YER039C	HVG1
YNR072W::chr00_6	YNR072W	HXT17
YBR157C::chr2_3	YBR157C	ICS2
YPL250C::chr16_1	YPL250C	ICY2
YLR174W::chr12_3	YLR174W	IDP2
YNL009W::chr14_4	YNL009W	IDP3
YBR159W::chr2_3	YBR159W	IFA38
YBL076C::chr2_1	YBL076C	ILS1
YCL009C::chr3_1	YCL009C	ILV6
YCR046C::chr00_16a	YCR046C	IMG1
YFR013W::chr6_1	YFR013W	IOC3
YMR044W::chr13_2	YMR044W	IOC4
YHR085W::chr8_2	YHR085W	IPI1
YDR315C::chr4_6	YDR315C	IPK1
YPL209C::chr16_1	YPL209C	IPL1
YOR235W::chr15_3	YOR235W	IRC13
YIR036C::chr00_3	YIR036C	IRC24
YFR038W::chr00_2	YFR038W	IRC5
YFR043C::chr00_2	YFR043C	IRC6
YOL002C::chr15_5	YOL002C	IZH2
YJL034W::chr10_2	YJL034W	KAR2
YMR065W::chr00_6	YMR065W	KAR5
YPL263C::chr16_1	YPL263C	KEL3
YGL203C::chr7_3	YGL203C	KEX1
YAR018C::chr1_1	YAR018C	KIN3
YKL168C::chr11_2	YKL168C	KKQ8
YNL024C-A::chr00_21	YNL024C-A	KSH1
YHR082C::chr8_2	YHR082C	KSP1
YPL053C::chr16_3	YPL053C	KTR6
YJL062W::chr10_2	YJL062W	LAS21
YLR104W::chr12_2	YLR104W	LCL2
YBL006C::chr2_1	YBL006C	LDB7
YOR123C::chr15_2	YOR123C	LEO1
YKL073W::chr11_1	YKL073W	LHS1
YHR156C::chr8_3	YHR156C	LIN1
YGR244C::chr00_2	YGR244C	LSC2
YGL099W::chr7_2	YGL099W	LSG1
YBR115C::chr2_3	YBR115C	LYS2
YNR050C::chr00_4	YNR050C	LYS9
YBR299W::chr00_17a	YBR299W	MAL32
YOL060C::chr15_5	YOL060C	MAM3
YBL023C::chr2_1	YBL023C	MCM2
YDR318W::chr4_6	YDR318W	MCM21
YPR019W::chr16_4	YPR019W	MCM4
YLR368W::chr12_5	YLR368W	MDM30
YJL102W::chr10_2	YJL102W	MEF2
YKR007W::chr11_3	YKR007W	MEH1
YPR138C::chr16_5	YPR138C	MEP3
YNL277W::chr14_1	YNL277W	MET2
YJR010W::chr00_13	YJR010W	MET3
YPL038W::chr16_3	YPL038W	MET31
YER091C::chr00_8	YER091C	MET6
YPL060W::chr16_3	YPL060W	MFM1
YIR033W::chr00_3	YIR033W	MGA2
YMR115W::chr00_9	YMR115W	MGR3
YLL062C::chr12_1	YLL062C	MHT1
YLR332W::chr12_5	YLR332W	MID2
YLR099W-A::chr00_21	YLR099W-A	MIM2
YEL007W::chr5_2	YEL007W	MIT1
YPL140C::chr16_2	YPL140C	MKK2
YNL117W::chr14_3	YNL117W	MLS1
YLR190W::chr12_3	YLR190W	MMR1
YIR025W::chr00_3	YIR025W	MND2
YHR204W::chr8_3	YHR204W	MNL1
YDR245W::chr4_6	YDR245W	MNN10
YKL200C::chr11_3	YKL201C	MNN4
YIL014W::chr9_1	YIL014W	MNT3
YNR059W::chr00_4	YNR059W	MNT4
YBL049W::chr2_1	YBL049W	MOH1
YHR162W::chr00_8	YHR162W	MPC2
YIR002C::chr9_2	YIR002C	MPH1
YDR033W::chr4_3	YDR033W	MRH1
YNL284C::chr00_18	YNL284C	MRPL10
YKR085C::chr00_15	YKR085C	MRPL20
YMR024W::chr13_2	YMR024W	MRPL3
YMR286W::chr13_5	YMR286W	MRPL33
YDR322W::chr4_6	YDR322W	MRPL35
YHR147C::chr8_3	YHR147C	MRPL6
YDR337W::chr4_6	YDR337W	MRPS28
YDR335W::chr4_6	YDR335W	MSN5
YGL226W::chr7_3	YGL226W	MTC3
YHR168W::chr00_8	YHR168W	MTG2
YDR277C::chr4_6	YDR277C	MTH1
YGR257C::chr00_17a	YGR257C	MTM1
YJL050W::chr10_2	YJL050W	MTR4
YPL070W::chr16_3	YPL070W	MUK1
YNL137C::chr00_16b	YNL137C	NAM9
YPL126W::chr16_2	YPL126W	NAN1
YDR397C::chr4_7	YDR397C	NCB2
YPR149W::chr16_5	YPR149W	NCE102
YLR254C::chr12_4	YLR254C	NDL1
YMR309C::chr13_5	YMR309C	NIP1
YNL123W::chr14_3	YNL123W	NMA111
YHR170W::chr00_8	YHR170W	NMD3
YLR363C::chr12_5	YLR363C	NMD4
YLR002C::chr12_1	YLR002C	NOC3
YNR053C::chr00_4	YNR053C	NOG2
YHR072W-A::chr00_20	YHR072W-A	NOP10
YNL110C::chr14_3	YNL110C	NOP15
YER002W::chr5_2	YER002W	NOP16
YDL213C::chr4_3	YDL213C	NOP6
YMR091C::chr00_6	YMR091C	NPL6
YMR047C::chr13_2	YMR047C	NUP116
YIL115C::chr9_2	YIL115C	NUP159
YAR002W::chr1_1	YAR002W	NUP60
YDL193W::chr4_3	YDL193W	NUS1
YPR168W::chr16_5	YPR168W	NUT2
YKL120W::chr11_2	YKL120W	OAC1
YPL052W::chr16_3	YPL052W	OAZ1
YDR316W::chr4_6	YDR316W	OMS1
YKR035C::chr11_3	YKR035C	OPI8
YPR194C::chr16_5	YPR194C	OPT2
YBR060C::chr2_2	YBR060C	ORC2
YJR051W::chr00_13	YJR051W	OSM1
YJL002C::chr00_13	YJL002C	OST1
YLR054C::chr12_2	YLR054C	OSW2
YBR279W::chr00_1	YBR279W	PAF1
YDR348C::chr4_7	YDR348C	PAL1
YGL261C::chr7_3	YGL261C	PAU11
YLR037C::chr00_8	YLR037C	PAU23
YBR295W::chr00_1	YBR295W	PCA1
YKR097W::chr00_4	YKR097W	PCK1
YLR134W::chr12_3	YLR134W	PDC5
YPR002W::chr16_3	YPR002W	PDH1
YBL005W::chr2_1	YBL005W	PDR3
YBL017C::chr2_1	YBL017C	PEP1
YDR323C::chr4_6	YDR323C	PEP7
YKR046C::chr00_14	YKR046C	PET10
YMR257C::chr13_5	YMR257C	PET111
YBL080C::chr2_1	YBL080C	PET112
YER153C::chr00_5	YER153C	PET122
YLR067C::chr12_2	YLR067C	PET309
YNL003C::chr14_4	YNL003C	PET8
YBL030C::chr2_1	YBL030C	PET9
YMR026C::chr13_2	YMR026C	PEX12
YOL044W::chr15_5	YOL044W	PEX15
YHR160C::chr8_3	YHR160C	PEX18
YDR329C::chr4_6	YDR329C	PEX3
YIL107C::chr9_2	YIL107C	PFK26
YHR185C::chr00_10	YHR185C	PFS1
YMR105C::chr00_9	YMR105C	PGM2
YGR231C::chr00_2	YGR231C	PHB2
YPL031C::chr16_3	YPL031C	PHO85
YCR037C::chr00_1	YCR037C	PHO87
YBR296C::chr00_1	YBR296C	PHO89
YER053C::chr5_3	YER053C	PIC2
YBL022C::chr2_1	YBL022C	PIM1
YPR154W::chr16_5	YPR154W	PIN3
YKL163W::chr11_2	YKL163W	PIR3
YPR113W::chr16_5	YPR113W	PIS1
YDR501W::chr4_8	YDR501W	PLM2
YDR183W::chr4_5	YDR183W	PLP1
YOR321W::chr15_4	YOR321W	PMT3
YPL096W::chr16_2	YPL096W	PNG1
YJR006W::chr00_13	YJR006W	POL31
YNL282W::chr14_1	YNL282W	POP3
YPL188W::chr16_1	YPL188W	POS5
YDL188C::chr4_2	YDL188C	PPH22
YMR297W::chr13_5	YMR297W	PRC1
YML092C::chr00_9	YML092C	PRE8
YHL011C::chr00_10	YHL011C	PRS3
YBL046W::chr2_1	YBL046W	PSY4
YAL043C::chr1_1	YAL043C	PTA1
YLR196W::chr12_3	YLR196W	PWP1
YPR186C::chr16_5	YPR186C	PZF1
YPL022W::chr16_3	YPL022W	RAD1
YBR114W::chr2_3	YBR114W	RAD16
YDR217C::chr4_5	YDR217C	RAD9
YPL246C::chr16_1	YPL246C	RBD2
YLR329W::chr12_5	YLR329W	REC102
YLR059C::chr12_2	YLR059C	REX2
YBR052C::chr2_2	YBR052C	RFS1
YLR176C::chr12_3	YLR176C	RFX1
YDR379W::chr4_7	YDR379W	RGA2
YOR107W::chr15_2	YOR107W	RGS2
YBR192W::chr2_4	YBR192W	RIM2
YHR197W::chr8_3	YHR197W	RIX1
YPL208W::chr16_1	YPL208W	RKM1
YDR257C::chr4_6	YDR257C	RKM4
YPR018W::chr16_4	YPR018W	RLF2
YDR255C::chr4_6	YDR255C	RMD5
YPL024W::chr16_3	YPL024W	RMI1
YGL250W::chr7_3	YGL250W	RMR1
YDR279W::chr4_6	YDR279W	RNH202
YGR276C::chr00_17a	YGR276C	RNH70
YGL144C::chr7_2	YGL144C	ROG1
YGR070W::chr7_4	YGR070W	ROM1
YPR065W::chr16_4	YPR065W	ROX1
YBL093C::chr2_1	YBL093C	ROX3
YJL140W::chr00_14	YJL140W	RPB4
YBR154C::chr2_3	YBR154C	RPB5
YDR404C::chr4_7	YDR404C	RPB7
YOR224C::chr15_3	YOR224C	RPB8
YHR143W-A::chr8_3	YHR143W-A	RPC10
YJL011C::chr00_13	YJL011C	RPC17
YNL330C::chr14_1	YNL330C	RPD3
YHR088W::chr8_2	YHR088W	RPF1
YKR081C::chr00_3	YKR081C	RPF2
YLR075W::chr12_2	YLR075W	RPL10
YGR085C::chr7_4	YGR085C	RPL11B
YDR418W::chr4_7	YDR418W	RPL12B
YMR142C::chr00_8	YMR142C	RPL13B
YNL069C::chr00_18	YNL069C	RPL16B
YNL069C::chr14_3	YNL069C	RPL16B
YOL120C::chr00_6	YOL120C	RPL18A
YBL027W::chr2_1	YBL027W	RPL19B
YBR191W::chr2_4	YBR191W	RPL21A
YLR061W::chr12_2	YLR061W	RPL22A
YLR344W::chr12_5	YLR344W	RPL26A
YGL030W::chr7_1	YGL030W	RPL30
YOR234C::chr15_3	YOR234C	RPL33B
YJL189W::chr00_14	YJL189W	RPL39
YNL162W::chr14_2	YNL162W	RPL42A
YNL067W::chr00_16b	YNL067W	RPL9B
YPR108W::chr16_5	YPR108W	RPN7
YPR187W::chr16_5	YPR187W	RPO26
YFL036W::chr6_1	YFL036W	RPO41
YDR382W::chr4_7	YDR382W	RPP2B
YOL040C::chr15_5	YOL040C	RPS15
YML024W::chr13_2	YML024W	RPS17A
YLR441C::chr00_4	YLR441C	RPS1A
YLR333C::chr12_5	YLR333C	RPS25B
YER131W::chr00_5	YER131W	RPS26B
YPL090C::chr16_3	YPL090C	RPS6A
YBR189W::chr2_4	YBR189W	RPS9B
YIL153W::chr9_2	YIL153W	RRD1
YPR116W::chr16_5	YPR116W	RRG8
YBL014C::chr2_1	YBL014C	RRN6
YHR069C::chr8_2	YHR069C	RRP4
YDR280W::chr4_6	YDR280W	RRP45
YCL031C::chr3_1	YCL031C	RRP7
YOR294W::chr15_4	YOR294W	RRS1
YMR030W::chr13_2	YMR030W	RSF1
YNR037C::chr14_4	YNR037C	RSM19
YDR175C::chr4_5	YDR175C	RSM24
YGR152C::chr7_5	YGR152C	RSR1
YOR118W::chr15_2	YOR118W	RTC5
YGL244W::chr7_3	YGL244W	RTF1
YER139C::chr00_5	YER139C	RTR1
YGR275W::chr00_3	YGR275W	RTT102
YER104W::chr00_5	YER104W	RTT105
YHR154W::chr8_3	YHR154W	RTT107
YDR388W::chr4_7	YDR388W	RVS167
YBR095C::chr2_3	YBR095C	RXT2
YDR129C::chr4_4	YDR129C	SAC6
YNL083W::chr00_16b	YNL083W	SAL1
YJL098W::chr10_2	YJL098W	SAP185
YGL229C::chr7_3	YGL229C	SAP4
YBL052C::chr2_1	YBL052C	SAS3
YER147C::chr00_5	YER147C	SCC4
YBR037C::chr2_2	YBR037C	SCO1
YBR024W::chr2_2	YBR024W	SCO2
YMR272C::chr13_5	YMR272C	SCS7
YBL011W::chr2_1	YBL011W	SCT1
YLR208W::chr12_3	YLR208W	SEC13
YPL085W::chr16_3	YPL085W	SEC16
YIL109C::chr9_2	YIL109C	SEC24
YER008C::chr5_2	YER008C	SEC3
YLR440C::chr00_4	YLR440C	SEC39
YDR170C::chr4_5	YDR170C	SEC7
YLR321C::chr12_4	YLR321C	SFH1
YPR161C::chr16_5	YPR161C	SGV1
YGL228W::chr7_3	YGL228W	SHE10
YOR035C::chr15_1	YOR035C	SHE4
YBL058W::chr2_1	YBL058W	SHP1
YHL006C::chr8_1	YHL006C	SHU1
YGR112W::chr7_4	YGR112W	SHY1
YDR422C::chr4_7	YDR422C	SIP1
YJL089W::chr10_2	YJL089W	SIP4
YDR227W::chr4_5	YDR227W	SIR4
YNL032W::chr14_4	YNL032W	SIW14
YLR187W::chr12_3	YLR187W	SKG3
YDR328C::chr4_6	YDR328C	SKP1
YPL026C::chr16_3	YPL026C	SKS1
YBR156C::chr2_3	YBR156C	SLI15
YLR086W::chr12_2	YLR086W	SMC4
YLR275W::chr12_4	YLR275W	SMD2
YLR147C::chr12_3	YLR147C	SMD3
YFL018W-A::chr6_1	YFL017W-A	SMX2
YOR327C::chr15_4	YOR327C	SNC2
YIL016W::chr9_1	YIL016W	SNL1
YFL060C::chr00_18	YFL060C	SNO3
YPR101W::chr16_4	YPR101W	SNT309
YDR240C::chr4_5	YDR240C	SNU56
YCR073W-A::chr00_1	YCR073W-A	SOL2
YHR163W::chr8_3	YHR163W	SOL3
YMR066W::chr00_6	YMR066W	SOV1
YLL021W::chr12_1	YLL021W	SPA2
YJR010C-A::chr00_13	YJR010C-A	SPC1
YLR066W::chr12_2	YLR066W	SPC3
YHR172W::chr8_3	YHR172W	SPC97
YKR031C::chr11_3	YKR031C	SPO14
YHR153C::chr8_3	YHR153C	SPO16
YER148W::chr00_5	YER148W	SPT15
YKL020C::chr11_1	YKL020C	SPT23
YDR392W::chr4_7	YDR392W	SPT3
YDR308C::chr4_6	YDR308C	SRB7
YOR247W::chr15_3	YOR247W	SRL1
YDR292C::chr4_6	YDR292C	SRP101
YPL243W::chr16_1	YPL243W	SRP68
YMR101C::chr00_9	YMR101C	SRT1
YBL075C::chr2_1	YBL075C	SSA3
YBR283C::chr00_1	YBR283C	SSH1
YIL143C::chr9_2	YIL143C	SSL2
YHR064C::chr00_8	YHR064C	SSZ1
YHR178W::chr8_3	YHR178W	STB5
YDR410C::chr4_7	YDR410C	STE14
YDR103W::chr4_4	YDR103W	STE5
YKL209C::chr11_3	YKL209C	STE6
YDR082W::chr4_4	YDR082W	STN1
YBR143C::chr2_3	YBR143C	SUP45
YPL057C::chr16_3	YPL057C	SUR1
YLR385C::chr12_5	YLR385C	SWC7
YAR044W::chr1_1	YAR042W	SWH1
YLR251W::chr12_4	YLR251W	SYM1
YGL243W::chr7_3	YGL243W	TAD1
YGR274C::chr00_3	YGR274C	TAF1
YMR005W::chr00_14	YMR005W	TAF4
YBR198C::chr2_4	YBR198C	TAF5
YJR046W::chr00_13	YJR046W	TAH11
YGL232W::chr7_3	YGL232W	TAN1
YPR140W::chr16_5	YPR140W	TAZ1
YBR150C::chr00_16a	YBR150C	TBS1
YOR086C::chr15_1	YOR086C	TCB1
YDR212W::chr4_5	YDR212W	TCP1
YPR157W::chr16_5	YPR157W	TDA6
YIL039W::chr9_1	YIL039W	TED1
YBR118W::chr2_3	YBR118W	TEF2
YDR311W::chr4_6	YDR311W	TFB1
YDR058C::chr00_14	YDR058C	TGL2
YNL332W::chr14_1	YNL332W	THI12
YOL055C::chr15_5	YOL055C	THI20
YHR167W::chr8_3	YHR167W	THP2
YKR059W::chr11_3	YKR059W	TIF1
YPL063W::chr16_3	YPL063W	TIM50
YGL145W::chr7_2	YGL145W	TIP20
YER175C::chr00_5	YER175C	TMT1
YJL093C::chr10_2	YJL093C	TOK1
YNL131W::chr14_3	YNL131W	TOM22
YNL088W::chr14_3	YNL088W	TOP2
YLR234W::chr12_4	YLR234W	TOP3
YBR162C::chr2_3	YBR162C	TOS1
YNL300W::chr00_8	YNL300W	TOS6
YJL164C::chr10_1	YJL164C	TPK1
YKL166C::chr11_2	YKL166C	TPK3
YBR126C::chr2_3	YBR126C	TPS1
YMR261C::chr13_5	YMR261C	TPS3
YKR050W::chr11_3	YKR050W	TRK2
YDR165W::chr4_5	YDR165W	TRM82
YDR353W::chr4_7	YDR353W	TRR1
YGR166W::chr7_5	YGR166W	TRS65
YER093C::chr00_8	YER093C	TSC11
YOR187W::chr15_2	YOR187W	TUF1
YDR100W::chr4_4	YDR100W	TVP15
YBL067C::chr2_1	YBL067C	UBP13
YMR304W::chr13_5	YMR304W	UBP15
YFR010W::chr6_1	YFR010W	UBP6
YDR330W::chr4_6	YDR330W	UBX5
YBR006W::chr2_2	YBR006W	UGA2
YDR470C::chr4_8	YDR470C	UGO1
YML021C::chr00_4	YML021C	UNG1
YKL216W::chr11_3	YKL216W	URA1
YBL039C::chr2_1	YBL039C	URA7
YLR222C::chr12_3	YLR222C	UTP13
YDR398W::chr4_7	YDR398W	UTP5
YHR196W::chr8_3	YHR196W	UTP9
YGL212W::chr7_3	YGL212W	VAM7
YGL258W::chr7_3	YGL258W	VEL1
YDR247W::chr4_6	YDR247W	VHS1
YBR105C::chr2_3	YBR105C	VID24
YPL234C::chr16_1	YPL234C	VMA11
YPR036W::chr16_4	YPR036W	VMA13
YBR127C::chr2_3	YBR127C	VMA2
YBR097W::chr2_3	YBR097W	VPS15
YPL065W::chr16_3	YPL065W	VPS28
YDR484W::chr4_8	YDR484W	VPS52
YJL029C::chr00_13	YJL029C	VPS53
YJR044C::chr00_13	YJR044C	VPS55
YDR200C::chr4_5	YDR200C	VPS64
YGL104C::chr7_2	YGL104C	VPS73
YAL002W::chr1_1	YAL002W	VPS8
YGL225W::chr7_3	YGL225W	VRG4
YER072W::chr5_3	YER072W	VTC1
YPL019C::chr16_3	YPL019C	VTC3
YOR359W::chr15_4	YOR359W	VTS1
YOL097C::chr00_6	YOL097C	WRS1
YDR369C::chr4_7	YDR369C	XRS2
YAL004W::chr1_1	YAL004W	YAL004W
YAL043C-A::chr1_1	YAL042C-A	YAL042C-A
YHR161C::chr8_3	YHR161C	YAP1801
YBL010C::chr2_1	YBL010C	YBL010C
YBL044W::chr2_1	YBL044W	YBL044W
YBL055C::chr2_1	YBL055C	YBL055C
YBL065W::chr2_1	YBL065W	YBL065W
YBL073W::chr2_1	YBL073W	YBL073W
YBL095W::chr2_2	YBL095W	YBL095W
YBR016W::chr2_2	YBR016W	YBR016W
YBR027C::chr2_2	YBR027C	YBR027C
YBR053C::chr2_2	YBR053C	YBR053C
YBR071W::chr2_2	YBR071W	YBR071W
YBR074W::chr2_2	YBR074W	YBR074W
YBR099C::chr2_3	YBR099C	YBR099C
YBR116C::chr2_3	YBR116C	YBR116C
YBR190W::chr2_4	YBR190W	YBR190W
YBR300C::chr00_1	YBR300C	YBR300C
YCL022C::chr00_12	YCL022C	YCL022C
YCR025C::chr00_1	YCR025C	YCR025C
YCR061W::chr00_1	YCR061W	YCR061W
YLL055W::chr12_1	YLL055W	YCT1
YDL032W::chr4_1	YDL032W	YDL032W
YDL199C::chr4_3	YDL199C	YDL199C
YDL241W::chr4_3	YDL241W	YDL241W
YDR179W-A::chr4_5	YDR179W-A	YDR179W-A
YDR193W::chr4_5	YDR193W	YDR193W
YDR199W::chr4_5	YDR199W	YDR199W
YDR215C::chr4_5	YDR215C	YDR215C
YDR262W::chr4_6	YDR262W	YDR262W
YDR266C::chr4_6	YDR266C	YDR266C
YDR271C::chr4_6	YDR271C	YDR271C
YDR274C::chr4_6	YDR274C	YDR274C
YDR282C::chr4_6	YDR282C	YDR282C
YDR319C::chr4_6	YDR319C	YDR319C
YDR333C::chr4_6	YDR333C	YDR333C
YDR336W::chr4_6	YDR336W	YDR336W
YDR340W::chr4_7	YDR340W	YDR340W
YDR341C::chr4_7	YDR341C	YDR341C
YDR374C::chr4_7	YDR374C	YDR374C
YDR387C::chr4_7	YDR387C	YDR387C
YDR401W::chr4_7	YDR401W	YDR401W
YDR415C::chr4_7	YDR415C	YDR415C
YDR535C::chr00_2	YDR535C	YDR535C
YEL041W::chr5_2	YEL041W	YEF1
YER066C-A::chr5_3	YER066C-A	YER066C-A
YER152C::chr00_5	YER152C	YER152C
YFL012W::chr00_17a	YFL012W	YFL012W
YFR016C::chr6_1	YFR016C	YFR016C
YGL108C::chr7_2	YGL108C	YGL108C
YGR001C::chr7_3	YGR001C	YGR001C
YGR054W::chr7_4	YGR054W	YGR054W
YGR130C::chr7_5	YGR130C	YGR130C
YGR149W::chr7_5	YGR149W	YGR149W
YGR265W::chr00_3	YGR265W	YGR265W
YGR290W::chr00_3	YGR290W	YGR290W
YJL059W::chr10_2	YJL059W	YHC3
YHL005C::chr8_1	YHL005C	YHL005C
YHR180W::chr00_10	YHR180W	YHR180W
YHR210C::chr8_3	YHR210C	YHR210C
YIL001W::chr9_1	YIL001W	YIL001W
YIL058W::chr00_17b	YIL058W	YIL058W
YIL077C::chr9_1	YIL077C	YIL077C
YIL092W::chr00_17b	YIL092W	YIL092W
YGL198W::chr7_3	YGL198W	YIP4
YJL016W::chr00_13	YJL016W	YJL016W
YJL017W::chr00_13	YJL016W	YJL016W
YJL045W::chr10_2	YJL045W	YJL045W
YJL163C::chr00_14	YJL163C	YJL163C
YJR012C::chr00_13	YJR012C	YJR012C
YLR200W::chr12_3	YLR200W	YKE2
YKL031W::chr11_1	YKL031W	YKL031W
YKL044W::chr11_1	YKL044W	YKL044W
YKL069W::chr11_1	YKL069W	YKL069W
YKL131W::chr11_2	YKL131W	YKL131W
YKR017C::chr11_3	YKR017C	YKR017C
YKR032W::chr11_3	YKR032W	YKR032W
YLL020C::chr12_1	YLL020C	YLL020C
YLR063W::chr12_2	YLR063W	YLR063W
YLR076C::chr12_2	YLR076C	YLR076C
YLR108C::chr12_2	YLR108C	YLR108C
YLR118C::chr12_2	YLR118C	YLR118C
YLR169W::chr12_3	YLR169W	YLR169W
YLR184W::chr12_3	YLR184W	YLR184W
YLR194C::chr12_3	YLR194C	YLR194C
YLR202C::chr12_3	YLR202C	YLR202C
YLR225C::chr12_3	YLR225C	YLR225C
YLR232W::chr12_4	YLR232W	YLR232W
YLR269C::chr12_4	YLR269C	YLR269C
YLR281C::chr12_4	YLR281C	YLR281C
YLR294C::chr12_4	YLR294C	YLR294C
YLR365W::chr12_5	YLR365W	YLR365W
YLR366W::chr12_5	YLR366W	YLR366W
YLR413W::chr12_5	YLR413W	YLR413W
YMR302C::chr13_5	YMR302C	YME2
YML018C::chr13_2	YML018C	YML018C
YML048W-A::chr13_1b	YML047W-A	YML047W-A
YML102C-A::chr00_9	YML101C-A	YML101C-A
YMR031W-A::chr13_2	YMR031W-A	YMR031W-A
YMR103C::chr00_9	YMR103C	YMR103C
YMR124W::chr00_9	YMR124W	YMR124W
YMR158C-B::chr00_4	YMR158C-A	YMR158C-A
YMR181C::chr00_8	YMR181C	YMR181C
YMR194C-A::chr00_4	YMR194C-A	YMR194C-A
YMR326C::chr00_4	YMR326C	YMR326C
YNL018C::chr00_18	YNL018C	YNL018C
YNL043C::chr14_4	YNL043C	YNL043C
YNL058C::chr14_3	YNL058C	YNL058C
YNL108C::chr14_3	YNL108C	YNL108C
YNL140C::chr00_17b	YNL140C	YNL140C
YNL144C::chr14_3	YNL144C	YNL144C
YNL193W::chr14_2	YNL193W	YNL193W
YNL234W::chr14_2	YNL234W	YNL234W
YNL247W::chr14_1	YNL247W	YNL247W
YNR005C::chr14_4	YNR005C	YNR005C
YNR014W::chr14_4	YNR014W	YNR014W
YNR061C::chr00_4	YNR061C	YNR061C
YNR065C::chr00_4	YNR065C	YNR065C
YNR073C::chr00_6	YNR073C	YNR073C
YOL024W::chr15_5	YOL024W	YOL024W
YOL035C::chr15_5	YOL035C	YOL035C
YOL107W::chr00_6	YOL107W	YOL107W
YOL153C::chr00_15	YOL153C	YOL153C
YOL163W::chr00_10	YOL163W	YOL163W
YOR053W::chr15_1	YOR053W	YOR053W
YOR105W::chr15_2	YOR105W	YOR105W
YOR277C::chr15_3	YOR277C	YOR277C
YOR318C::chr15_4	YOR318C	YOR318C
YOR365C::chr15_4	YOR365C	YOR365C
YOR378W::chr15_4	YOR378W	YOR378W
YER074W-A::chr00_20	YER074W-A	YOS1
YPL062W::chr16_3	YPL062W	YPL062W
YPL068C::chr16_3	YPL068C	YPL068C
YPL113C::chr16_2	YPL113C	YPL113C
YPL142C::chr16_2	YPL142C	YPL142C
YPL191C::chr16_1	YPL191C	YPL191C
YPL197C::chr16_1	YPL197C	YPL197C
YPL238C::chr16_1	YPL238C	YPL238C
YPL245W::chr16_1	YPL245W	YPL245W
YPL260W::chr16_1	YPL260W	YPL260W
YPR003C::chr16_3	YPR003C	YPR003C
YPR027C::chr16_4	YPR027C	YPR027C
YPR053C::chr16_4	YPR053C	YPR053C
YPR059C::chr16_4	YPR059C	YPR059C
YPR117W::chr16_5	YPR117W	YPR117W
YPR127W::chr16_5	YPR127W	YPR127W
YPR130C::chr16_5	YPR130C	YPR130C
YPR142C::chr16_5	YPR142C	YPR142C
YPR150W::chr16_5	YPR150W	YPR150W
YPR172W::chr16_5	YPR172W	YPR172W
YLR121C::chr12_2	YLR121C	YPS3
YHR105W::chr8_2	YHR105W	YPT35
YLR262C::chr12_4	YLR262C	YPT6
YNL138W-A::chr00_21	YNL138W-A	YSF3
YHR155W::chr8_3	YHR155W	YSP1
YMR089C::chr00_6	YMR089C	YTA12
YDR285W::chr4_6	YDR285W	ZIP1
YGL255W::chr7_3	YGL255W	ZRT1

## Sheet: ground+NaCl
Strain	ORF	Gene
YMR056C::chr00_5	YMR056C	AAC1
YBR085W::chr2_3	YBR085W	AAC3
YDL243C::chr4_3	YDL243C	AAD4
YNL141W::chr14_3	YNL141W	AAH1
YHR047C::chr8_2	YHR047C	AAP1
YBL074C::chr2_1	YBL074C	AAR2
YKL112W::chr11_2	YKL112W	ABF1
YMR072W::chr00_6	YMR072W	ABF2
YNR033W::chr00_18	YNR033W	ABZ1
YMR289W::chr13_5	YMR289W	ABZ2
YER045C::chr5_3	YER045C	ACA1
YGR037C::chr7_4	YGR037C	ACB1
YNR016C::chr14_4	YNR016C	ACC1
YLR131C::chr12_3	YLR131C	ACE2
YLR144C::chr12_3	YLR144C	ACF2
YBL015W::chr2_1	YBL015W	ACH1
YLR304C::chr12_4	YLR304C	ACO1
YKL192C::chr11_3	YKL192C	ACP1
YFL039C::chr00_15	YFL039C	ACT1
YDR448W::chr4_8	YDR448W	ADA2
YMR184W::chr13_4	YMR184W	ADD37
YKL206C::chr11_3	YKL206C	ADD66
YAR015W::chr1_1	YAR015W	ADE1
YNL220W::chr00_18	YNL220W	ADE12
YLR028C::chr12_1	YLR028C	ADE16
YOR128C::chr15_2	YOR128C	ADE2
YMR300C::chr13_5	YMR300C	ADE4
YGL234W::chr7_3	YGL234W	ADE5,7
YDR408C::chr4_7	YDR408C	ADE8
YOL086C::chr00_6	YOL086C	ADH1
YGL256W::chr7_3	YGL256W	ADH4
YBR145W::chr2_3	YBR145W	ADH5
YCR105W::chr00_2	YCR105W	ADH7
YMR009W::chr13_2	YMR009W	ADI1
YER170W::chr00_5	YER170W	ADK2
YLR227C::chr12_3	YLR227C	ADY4
YMR064W::chr00_6	YMR064W	AEP1
YMR282C::chr13_5	YMR282C	AEP2
YPL005W::chr16_3	YPL005W	AEP3
YER017C::chr5_3	YER017C	AFG3
YNR044W::chr14_4	YNR044W	AGA1
YGL032C::chr7_1	YGL032C	AGA2
YIL044C::chr9_1	YIL044C	AGE2
YCL025C::chr3_1	YCL025C	AGP1
YBR132C::chr2_3	YBR132C	AGP2
YFL055W::chr6_1	YFL055W	AGP3
YFL030W::chr6_1	YFL030W	AGX1
YDR214W::chr4_5	YDR214W	AHA1
YOR023C::chr15_1	YOR023C	AHC1
YCR082W::chr00_1	YCR082W	AHC2
YLR109W::chr12_2	YLR109W	AHP1
YHR093W::chr8_2	YHR093W	AHT1
YNR074C::chr00_6	YNR074C	AIF1
YAL046C::chr1_1	YAL046C	AIM1
YGL160W::chr7_2	YGL160W	AIM14
YHR198C::chr8_3	YHR198C	AIM18
YAL049C::chr1_1	YAL049C	AIM2
YIL158W::chr9_2	YIL158W	AIM20
YJL046W::chr10_2	YJL046W	AIM22
YBR108W::chr2_3	YBR108W	AIM3
YML050W::chr13_1b	YML050W	AIM32
YML087C::chr13_1b	YML087C	AIM33
YMR003W::chr13_2	YMR003W	AIM34
YNL100W::chr00_16b	YNL100W	AIM37
YBR194W::chr2_4	YBR194W	AIM4
YPL099C::chr16_2	YPL099C	AIM43
YPL158C::chr00_18	YPL158C	AIM44
YPR004C::chr16_3	YPR004C	AIM45
YHR199C::chr8_3	YHR199C	AIM46
YBR262C::chr2_4	YBR262C	AIM5
YMR092C::chr00_6	YMR092C	AIP1
YIL079C::chr9_1	YIL079C	AIR1
YDL175C::chr4_2	YDL175C	AIR2
YBR059C::chr2_2	YBR059C	AKL1
YDR264C::chr4_6	YDR264C	AKR1
YOR034C::chr15_1	YOR034C	AKR2
YOR335C::chr15_4	YOR335C	ALA1
YJL122W::chr10_2	YJL122W	ALB1
YMR169C::chr00_4	YMR169C	ALD3
YMR169C::chr13_4	YMR169C	ALD3
YNL148C::chr14_2	YNL148C	ALF1
YBR110W::chr2_3	YBR110W	ALG1
YBR070C::chr2_2	YBR070C	ALG14
YBL082C::chr2_1	YBL082C	ALG3
YOR002W::chr15_1	YOR002W	ALG6
YNL219C::chr14_2	YNL219C	ALG9
YBL009W::chr2_1	YBL009W	ALK2
YML086C::chr13_1b	YML086C	ALO1
YNL270C::chr14_1	YNL270C	ALP1
YLR089C::chr12_2	YLR089C	ALT1
YDR111C::chr4_4	YDR111C	ALT2
YKR021W::chr11_3	YKR021W	ALY1
YJL084C::chr10_2	YJL084C	ALY2
YGR225W::chr00_2	YGR225W	AMA1
YML035C::chr00_14	YML035C	AMD1
YDR242W::chr4_6	YDR242W	AMD2
YGL156W::chr7_2	YGL156W	AMS1
YEL036C::chr5_2	YEL036C	ANP1
YPR180W::chr16_5	YPR180W	AOS1
YLR127C::chr12_3	YLR127C	APC2
YBR151W::chr2_3	YBR151W	APD1
YKL157W::chr11_2	YKL157W	APE2
YKL158W::chr11_2	YKL157W	APE2
YBR286W::chr00_1	YBR286W	APE3
YNL077W::chr14_3	YNL077W	APJ1
YJR005W::chr00_13	YJR005W	APL1
YKL135C::chr11_2	YKL135C	APL2
YBL037W::chr2_1	YBL037W	APL3
YPL195W::chr16_1	YPL195W	APL5
YOL062C::chr15_5	YOL062C	APM4
YKL114C::chr11_2	YKL114C	APN1
YBL019W::chr2_1	YBL019W	APN2
YNL094W::chr14_3	YNL094W	APP1
YIL040W::chr9_1	YIL040W	APQ12
YLR170C::chr12_3	YLR170C	APS1
YJR058C::chr00_13	YJR058C	APS2
YML022W::chr00_11	YML022W	APT1
YDR441C::chr4_8	YDR441C	APT2
YNL065W::chr00_16b	YNL065W	AQR1
YPR192W::chr16_5	YPR192W	AQY1
YBR149W::chr2_3	YBR149W	ARA1
YMR041C::chr13_2	YMR041C	ARA2
YNR035C::chr14_4	YNR035C	ARC35
YHR013C::chr8_1	YHR013C	ARD1
YNR019W::chr14_4	YNR019W	ARE2
YDL192W::chr4_3	YDL192W	ARF1
YHR018C::chr8_1	YHR018C	ARG4
YER069W::chr5_3	YER069W	ARG5,6
YMR062C::chr00_6	YMR062C	ARG7
YMR042W::chr13_2	YMR042W	ARG80
YGL157W::chr7_2	YGL157W	ARI1
YNL020C::chr14_4	YNL020C	ARK1
YBR164C::chr2_3	YBR164C	ARL1
YPL051W::chr16_3	YPL051W	ARL3
YDR380W::chr4_7	YDR380W	ARO10
YPR060C::chr16_4	YPR060C	ARO7
YGL202W::chr7_3	YGL202W	ARO8
YDR421W::chr4_7	YDR421W	ARO80
YHR137W::chr8_2	YHR137W	ARO9
YHR129C::chr8_2	YHR129C	ARP1
YJR065C::chr00_13	YJR065C	ARP3
YJL081C::chr10_2	YJL081C	ARP4
YMR033W::chr00_11	YMR033W	ARP9
YMR033W::chr13_2	YMR033W	ARP9
YPR199C::chr16_5	YPR199C	ARR1
YPR200C::chr16_5	YPR200C	ARR2
YGR068C::chr7_4	YGR068C	ART5
YLR242C::chr12_4	YLR242C	ARV1
YPR085C::chr16_4	YPR085C	ASA1
YJL170C::chr10_1	YJL170C	ASG7
YMR119W::chr00_15	YMR119W	ASI1
YNL159C::chr14_2	YNL159C	ASI2
YGR097W::chr7_4	YGR097W	ASK10
YDL088C::chr4_1	YDL088C	ASM4
YDR321W::chr4_6	YDR321W	ASP1
YBL069W::chr2_1	YBL069W	AST1
YER101C::chr00_5	YER101C	AST2
YDR184C::chr4_5	YDR184C	ATC1
YGR177C::chr7_5	YGR177C	ATF2
YGL180W::chr7_2	YGL180W	ATG1
YPR049C::chr16_4	YPR049C	ATG11
YPR185W::chr16_5	YPR185W	ATG13
YBR128C::chr2_3	YBR128C	ATG14
YCR068W::chr00_1	YCR068W	ATG15
YOL082W::chr15_5	YOL082W	ATG19
YCL038C::chr00_12	YCL038C	ATG22
YLR431C::chr00_4	YLR431C	ATG23
YLR189C::chr12_3	YLR189C	ATG26
YNR007C::chr14_4	YNR007C	ATG3
YIL146C::chr9_2	YIL146C	ATG32
YLR356W::chr12_5	YLR356W	ATG33
YOL083W::chr15_5	YOL083W	ATG34
YNL223W::chr14_2	YNL223W	ATG4
YPL149W::chr16_2	YPL149W	ATG5
YHR171W::chr00_15	YHR171W	ATG7
YBL078C::chr2_1	YBL078C	ATG8
YPR026W::chr00_15	YPR026W	ATH1
YMR301C::chr13_5	YMR301C	ATM1
YDR384C::chr4_7	YDR384C	ATO3
YBL099W::chr2_2	YBL099W	ATP1
YLR393W::chr12_5	YLR393W	ATP10
YNL315C::chr00_17b	YNL315C	ATP11
YPL271W::chr16_1	YPL271W	ATP15
YDR377W::chr4_7	YDR377W	ATP17
YML081C-A::chr00_4	YML081C-A	ATP18
YPR020W::chr16_4	YPR020W	ATP20
YDR350C::chr4_7	YDR350C	ATP22
YMR098C::chr00_9	YMR098C	ATP25
YBR039W::chr2_2	YBR039W	ATP3
YPL078C::chr00_17b	YPL078C	ATP4
YPL078C::chr16_3	YPL078C	ATP4
YDR298C::chr4_6	YDR298C	ATP5
YKL016C::chr11_1	YKL016C	ATP7
YAL020C::chr1_1	YAL020C	ATS1
YOR079C::chr15_1	YOR079C	ATX2
YFL010W-A::chr00_17a	YFL010W-A	AUA1
YLR114C::chr12_2	YLR114C	AVL9
YOL078W::chr00_8	YOL078W	AVO1
YMR068W::chr00_6	YMR068W	AVO2
YJR001W::chr00_13	YJR001W	AVT1
YNL101W::chr14_3	YNL101W	AVT4
YBL089W::chr2_1	YBL089W	AVT5
YIL140W::chr9_2	YIL140W	AXL2
YLL063C::chr12_1	YLL063C	AYT1
YGR224W::chr00_2	YGR224W	AZR1
YBR068C::chr2_2	YBR068C	BAP2
YKR099W::chr00_4	YKR099W	BAS1
YPL255W::chr16_1	YPL255W	BBP1
YJL095W::chr10_2	YJL095W	BCK1
YER167W::chr00_5	YER167W	BCK2
YDR361C::chr4_7	YDR361C	BCP1
YDR375C::chr4_7	YDR375C	BCS1
YAL060W::chr1_1	YAL060W	BDH1
YAL061W::chr1_1	YAL061W	BDH2
YNL039W::chr14_4	YNL039W	BDP1
YBR200W::chr2_4	YBR200W	BEM1
YER155C::chr00_5	YER155C	BEM2
YLR412W::chr12_5	YLR412W	BER1
YIL004C::chr9_1	YIL004C	BET1
YPR176C::chr16_5	YPR176C	BET2
YJL031C::chr10_2	YJL031C	BET4
YML077W::chr00_11	YML077W	BET5
YJR053W::chr00_13	YJR053W	BFA1
YDR299W::chr4_6	YDR299W	BFR2
YGR282C::chr00_3	YGR282C	BGL2
YER016W::chr5_3	YER016W	BIM1
YGR286C::chr00_3	YGR286C	BIO2
YNR057C::chr00_4	YNR057C	BIO4
YNR056C::chr00_4	YNR056C	BIO5
YFL006W::chr6_1	YFL007W	BLM10
YFL007W::chr00_17a	YFL007W	BLM10
YER177W::chr00_5	YER177W	BMH1
YPL217C::chr00_18	YPL217C	BMS1
YJL060W::chr10_2	YJL060W	BNA3
YLR231C::chr12_4	YLR231C	BNA5
YFR047C::chr00_2	YFR047C	BNA6
YDR428C::chr4_7	YDR428C	BNA7
YNL271C::chr14_1	YNL271C	BNI1
YIL159W::chr9_2	YIL159W	BNR1
YGR230W::chr00_2	YGR230W	BNS1
YBL085W::chr2_1	YBL085W	BOI1
YLR267W::chr12_4	YLR267W	BOP2
YNL042W::chr14_4	YNL042W	BOP3
YNL275W::chr14_1	YNL275W	BOR1
YNR051C::chr00_4	YNR051C	BRE5
YHR036W::chr8_1	YHR036W	BRL1
YBL097W::chr2_2	YBL097W	BRN1
YPL084W::chr16_3	YPL084W	BRO1
YGL247W::chr7_3	YGL247W	BRR6
YOL077C::chr15_5	YOL077C	BRX1
YDR275W::chr4_6	YDR275W	BSC2
YNL269W::chr14_1	YNL269W	BSC4
YNR069C::chr00_15	YNR069C	BSC5
YOL137W::chr00_6	YOL137W	BSC6
YBR290W::chr00_1	YBR290W	BSD2
YPR171W::chr16_5	YPR171W	BSP1
YFL025C::chr6_1	YFL025C	BST1
YPL069C::chr16_3	YPL069C	BTS1
YDR252W::chr4_6	YDR252W	BTT1
YMR055C::chr00_5	YMR055C	BUB2
YOR026W::chr15_1	YOR026W	BUB3
YGL174W::chr7_2	YGL174W	BUD13
YAR014C::chr1_1	YAR014C	BUD14
YJL188C::chr10_1	YJL188C	BUD19
YMR014W::chr13_2	YMR014W	BUD22
YCR047C::chr00_16a	YCR047C	BUD23
YER014C-A::chr5_3	YER014C-A	BUD25
YDR241W::chr4_5	YDR241W	BUD26
YFL023W::chr6_1	YFL023W	BUD27
YLR062C::chr12_2	YLR062C	BUD28
YCR063W::chr00_1	YCR063W	BUD31
YGR041W::chr7_4	YGR041W	BUD9
YML111W::chr00_9	YML111W	BUL2
YLR226W::chr12_3	YLR226W	BUR2
YER159C::chr00_5	YER159C	BUR6
YNL305C::chr14_1	YNL305C	BXI1
YIL083C::chr9_1	YIL083C	CAB2
YKL088W::chr11_1	YKL088W	CAB3
YGR277C::chr00_3	YGR277C	CAB4
YDR196C::chr4_5	YDR196C	CAB5
YML102W::chr00_9	YML102W	CAC2
YDR423C::chr4_7	YDR423C	CAD1
YNL278W::chr14_1	YNL278W	CAF120
YKR036C::chr00_14	YKR036C	CAF4
YFL029C::chr00_18	YFL029C	CAK1
YPL048W::chr16_3	YPL048W	CAM1
YKL007W::chr11_1	YKL007W	CAP1
YIL034C::chr9_1	YIL034C	CAP2
YPL111W::chr16_2	YPL111W	CAR1
YMR280C::chr13_5	YMR280C	CAT8
YGR036C::chr7_4	YGR036C	CAX4
YPL178W::chr16_2	YPL178W	CBC2
YGR140W::chr7_5	YGR140W	CBF2
YLR175W::chr12_3	YLR175W	CBF5
YNL161W::chr14_2	YNL161W	CBK1
YJL209W::chr10_1	YJL209W	CBP1
YPL215W::chr16_1	YPL215W	CBP3
YGR174C::chr7_5	YGR174C	CBP4
YBR120C::chr2_3	YBR120C	CBP6
YIL043C::chr9_1	YIL043C	CBR1
YDR197W::chr4_5	YDR197W	CBS2
YKL208W::chr11_3	YKL208W	CBT1
YER168C::chr00_5	YER168C	CCA1
YLR220W::chr12_3	YLR220W	CCC1
YDR270W::chr4_6	YDR270W	CCC2
YKR066C::chr00_3	YKR066C	CCP1
YAL021C::chr1_1	YAL021C	CCR4
YMR038C::chr13_2	YMR038C	CCS1
YJL014W::chr00_13	YJL014W	CCT3
YJR064W::chr00_13	YJR064W	CCT5
YDR188W::chr4_5	YDR188W	CCT6
YJL008C::chr00_13	YJL008C	CCT8
YLR110C::chr00_15	YLR110C	CCW12
YLR390W-A::chr00_15	YLR390W-A	CCW14
YBR131W::chr00_16a	YBR131W	CCZ1
YLR307W::chr12_4	YLR307W	CDA1
YDR182W::chr4_5	YDR182W	CDC1
YFR028C::chr00_15	YFR028C	CDC14
YAR019C::chr1_1	YAR019C	CDC15
YKL022C::chr11_1	YKL022C	CDC16
YAL038W::chr1_1	YAL038W	CDC19
YOR074C::chr15_1	YOR074C	CDC21
YHR166C::chr8_3	YHR166C	CDC23
YAL041W::chr1_1	YAL041W	CDC24
YBL084C::chr2_1	YBL084C	CDC27
YBR160W_AS::shawn	YBR160W	CDC28
YBR160W::chr2_3	YBR160W	CDC28
YLR314C::chr12_4	YLR314C	CDC3
YOL139C::chr00_15	YOL139C	CDC33
YDR168W::chr4_5	YDR168W	CDC37
YCR093W::chr00_2	YCR093W	CDC39
YDR364C::chr4_7	YDR364C	CDC40
YLR229C::chr12_4	YLR229C	CDC42
YLR103C::chr12_2	YLR103C	CDC45
YMR001C::chr13_2	YMR001C	CDC5
YJL194W::chr10_1	YJL194W	CDC6
YPL160W::chr16_2	YPL160W	CDC60
YLR418C::chr12_5	YLR418C	CDC73
YJR057W::chr00_13	YJR057W	CDC8
YBR029C::chr2_2	YBR029C	CDS1
YER061C::chr5_3	YER061C	CEM1
YMR168C::chr13_4	YMR168C	CEP3
YOR112W::chr15_2	YOR112W	CEX1
YIL003W::chr9_1	YIL003W	CFD1
YDR301W::chr4_6	YDR301W	CFT1
YLR115W::chr12_2	YLR115W	CFT2
YGL206C::chr7_3	YGL206C	CHC1
YBR274W::chr00_1	YBR274W	CHK1
YPL008W::chr16_3	YPL008W	CHL1
YDR254W::chr4_6	YDR254W	CHL4
YGR157W::chr7_5	YGR157W	CHO2
YNL192W::chr14_2	YNL192W	CHS1
YBR038W::chr2_2	YBR038W	CHS2
YBR023C::chr2_2	YBR023C	CHS3
YLR330W::chr12_5	YLR330W	CHS5
YHR142W::chr8_3	YHR142W	CHS7
YER030W::chr5_3	YER030W	CHZ1
YDR267C::chr4_6	YDR267C	CIA1
YMR198W::chr00_11	YMR198W	CIK1
YMR138W::chr00_11	YMR138W	CIN4
YOR028C::chr15_1	YOR028C	CIN5
YEL061C::chr5_2	YEL061C	CIN8
YOR356W::chr15_4	YOR356W	CIR2
YJL158C::chr10_1	YJL158C	CIS3
YNR001C::chr14_4	YNR001C	CIT1
YPR001W::chr16_3	YPR001W	CIT3
YLR133W::chr12_3	YLR133W	CKI1
YBR135W::chr2_3	YBR135W	CKS1
YPR119W::chr16_5	YPR119W	CLB2
YLR210W::chr12_3	YLR210W	CLB4
YGR110W::chr00_14	YGR110W	CLD1
YLR117C::chr12_2	YLR117C	CLF1
YGL215W::chr7_3	YGL215W	CLG1
YAL040C::chr1_1	YAL040C	CLN3
YMR012W::chr13_2	YMR012W	CLU1
YKL137W::chr11_2	YKL137W	CMC1
YBR109C::chr2_3	YBR109C	CMD1
YFR014C::chr6_1	YFR014C	CMK1
YML057W::chr13_1b	YML057W	CMP2
YLR003C::chr12_1	YLR003C	CMS1
YKL190W::chr11_2	YKL190W	CNB1
YAL058W::chr1_1	YAL058W	CNE1
YDR357C::chr4_7	YDR357C	CNL1
YNL225C::chr14_2	YNL225C	CNM67
YFR046C::chr00_2	YFR046C	CNN1
YBR155W::chr2_3	YBR155W	CNS1
YLR218C::chr12_3	YLR218C	COA4
YLL050C::chr12_1	YLL050C	COF1
YGL223C::chr7_3	YGL223C	COG1
YER157W::chr00_5	YER157W	COG3
YPR105C::chr16_5	YPR105C	COG4
YNL051W::chr00_16b	YNL051W	COG5
YNL041C::chr14_4	YNL041C	COG6
YGL005C::chr7_1	YGL005C	COG7
YML071C::chr00_9	YML071C	COG8
YDL145C::chr4_2	YDL145C	COP1
YBR003W::chr2_2	YBR003W	COQ1
YNR041C::chr14_4	YNR041C	COQ2
YOL096C::chr00_6	YOL096C	COQ3
YDR204W::chr4_5	YDR204W	COQ4
YML110C::chr00_9	YML110C	COQ5
YGR255C::chr00_17a	YGR255C	COQ6
YLR201C::chr12_3	YLR201C	COQ9
YBL045C::chr2_1	YBL045C	COR1
YNR075W::chr00_6	YNR075W	COS10
YGL263W::chr7_3	YGL263W	COS12
YPL132W::chr00_8	YPL132W	COX11
YLR038C::chr00_8	YLR038C	COX12
YER141W::chr00_5	YER141W	COX15
YJL003W::chr00_13	YJL003W	COX16
YLL009C::chr12_1	YLL009C	COX17
YGR062C::chr7_4	YGR062C	COX18
YNL052W::chr00_16b	YNL052W	COX5A
YMR256C::chr13_5	YMR256C	COX7
YOR303W::chr00_17b	YOR303W	CPA1
YGR247W::chr00_2	YGR247W	CPD1
YDR155C::chr4_5	YDR155C	CPR1
YML078W::chr13_1b	YML078W	CPR3
YCR069W::chr00_16a	YCR069W	CPR4
YDR304C::chr4_6	YDR304C	CPR5
YLR216C::chr12_3	YLR216C	CPR6
YJL172W::chr00_14	YJL172W	CPS1
YNL130C::chr00_16b	YNL130C	CPT1
YOR100C::chr15_2	YOR100C	CRC1
YDR223W::chr4_5	YDR223W	CRF1
YHR209W::chr8_3	YHR209W	CRG1
YLR429W::chr00_4	YLR429W	CRN1
YHR146W::chr00_15	YHR146W	CRP1
YLR213C::chr12_3	YLR213C	CRR1
YOR031W::chr15_1	YOR031W	CRS5
YOL063C::chr15_5	YOL063C	CRT10
YGL238W::chr7_3	YGL238W	CSE1
YNR010W::chr14_4	YNR010W	CSE2
YKL049C::chr11_1	YKL049C	CSE4
YLR087C::chr12_2	YLR087C	CSF1
YBR161W::chr2_3	YBR161W	CSH1
YMR025W::chr13_2	YMR025W	CSI1
YMR048W::chr00_11	YMR048W	CSM3
YPL200W::chr16_1	YPL200W	CSM4
YPR030W::chr16_4	YPR030W	CSR2
YBR042C::chr2_2	YBR042C	CST26
YDR256C::chr4_6	YDR256C	CTA1
YMR078C::chr00_6	YMR078C	CTF18
YPL018W::chr16_3	YPL018W	CTF19
YLR381W::chr12_5	YLR381W	CTF3
YDR151C::chr4_5	YDR151C	CTH1
YPL181W::chr16_2	YPL181W	CTI6
YKL139W::chr00_14	YKL139W	CTK1
YML112W::chr00_9	YML112W	CTK3
YBR291C::chr00_1	YBR291C	CTP1
YCR054C::chr00_16a	YCR054C	CTR86
YLR286C::chr00_12	YLR286C	CTS1
YDR371W::chr4_7	YDR371W	CTS2
YKL090W::chr11_1	YKL090W	CUE2
YML101C::chr00_9	YML101C	CUE4
YOR042W::chr15_1	YOR042W	CUE5
YGR003W::chr7_3	YGR003W	CUL3
YGL166W::chr7_2	YGL166W	CUP2
YPL177C::chr16_2	YPL177C	CUP9
YMR240C::chr13_5	YMR240C	CUS1
YPL064C::chr16_3	YPL064C	CWC27
YKL096W::chr11_2	YKL096W	CWP1
YKL096W-A::chr00_14	YKL096W-A	CWP2
YML054C::chr13_1b	YML054C	CYB2
YJR048W::chr00_13	YJR048W	CYC1
YOR037W::chr15_1	YOR037W	CYC2
YAL039C::chr1_1	YAL039C	CYC3
YEL039C::chr5_2	YEL039C	CYC7
YBR112C::chr00_16a	YBR112C	CYC8
YDR430C::chr4_7	YDR430C	CYM1
YJL005W::chr00_13	YJL005W	CYR1
YAL012W::chr00_12	YAL012W	CYS3
YKL087C::chr11_1	YKL087C	CYT2
YKR083C::chr00_3	YKR083C	DAD2
YBR233W-A::chr00_20	YBR233W-A	DAD3
YDR320C-A::chr00_20	YDR320C-A	DAD4
YML070W::chr00_9	YML070W	DAK1
YFL053W::chr6_1	YFL053W	DAK2
YIR027C::chr00_3	YIR027C	DAL1
YIR029W::chr00_3	YIR029W	DAL2
YIR032C::chr00_17b	YIR032C	DAL3
YIR028W::chr00_3	YIR028W	DAL4
YIR023W::chr00_17b	YIR023W	DAL81
YNL314W::chr14_1	YNL314W	DAL82
YPL170W::chr16_2	YPL170W	DAP1
YML113W::chr00_9	YML113W	DAT1
YPL119C::chr16_2	YPL119C	DBP1
YNL112W::chr14_3	YNL112W	DBP2
YOR046C::chr15_1	YOR046C	DBP5
YNR038W::chr14_4	YNR038W	DBP6
YLR276C::chr12_4	YLR276C	DBP9
YLR128W::chr12_3	YLR128W	DCN1
YOL149W::chr00_10	YOL149W	DCP1
YNL118C::chr14_3	YNL118C	DCP2
YLR270W::chr12_4	YLR270W	DCS1
YPL194W::chr00_18	YPL194W	DDC1
YPL194W::chr16_1	YPL194W	DDC1
YER143W::chr00_5	YER143W	DDI1
YMR173W::chr00_11	YMR173W	DDR48
YHR019C::chr8_1	YHR019C	DED81
YFL001W::chr00_17a	YFL001W	DEG1
YAL013W::chr1_1	YAL013W	DEP1
YBR201W::chr2_4	YBR201W	DER1
YOR030W::chr15_1	YOR030W	DFG16
YMR238W::chr13_5	YMR238W	DFG5
YDR411C::chr4_7	YDR411C	DFM1
YOR311C::chr15_4	YOR311C	DGK1
YOR080W::chr15_1	YOR080W	DIA2
YDL024C::chr4_1	YDL024C	DIA3
YHR011W::chr8_1	YHR011W	DIA4
YKR035W-A::chr00_3	YKR035W-A	DID2
YKL002W::chr11_1	YKL002W	DID4
YLR437C::chr00_4	YLR437C	DIF1
YPL049C::chr16_3	YPL049C	DIG1
YDR263C::chr4_6	YDR263C	DIN7
YLR129W::chr12_3	YLR129W	DIP2
YPL265W::chr16_1	YPL265W	DIP5
YDR403W::chr4_7	YDR403W	DIT1
YDR402C::chr4_7	YDR402C	DIT2
YJL065C::chr10_2	YJL065C	DLS1
YMR126C::chr00_9	YMR126C	DLT1
YNL116W::chr14_3	YNL116W	DMA2
YHR164C::chr8_3	YHR164C	DNA2
YER166W::chr00_5	YER166W	DNF1
YLL001W::chr12_1	YLL001W	DNM1
YGL240W::chr7_3	YGL240W	DOC1
YHR044C::chr8_1	YHR044C	DOG1
YNL001W::chr14_4	YNL001W	DOM34
YDR273W::chr4_6	YDR273W	DON1
YPR175W::chr16_5	YPR175W	DPB2
YKL191W::chr11_3	YKL191W	DPH2
YLR172C::chr12_3	YLR172C	DPH5
YPR183W::chr16_5	YPR183W	DPM1
YDR284C::chr4_6	YDR284C	DPP1
YLL018C::chr12_1	YLL018C	DPS1
YKR071C::chr00_3	YKR071C	DRE2
YLL008W::chr12_1	YLL008W	DRS1
YAL026C::chr1_1	YAL026C	DRS2
YGL196W::chr7_3	YGL196W	DSD1
YHR143W::chr8_3	YHR143W	DSE2
YBR007C::chr2_2	YBR007C	DSF2
YMR276W::chr13_5	YMR276W	DSK2
YNL258C::chr14_1	YNL258C	DSL1
YIR010W::chr9_2	YIR010W	DSN1
YPR017C::chr16_4	YPR017C	DSS4
YBR180W::chr2_4	YBR180W	DTR1
YFR044C::chr00_2	YFR044C	DUG1
YBR281C::chr00_1	YBR281C	DUG2
YNL191W::chr14_2	YNL191W	DUG3
YML080W::chr13_1b	YML080W	DUS1
YLR401C::chr12_5	YLR401C	DUS3
YKR054C::chr11_3	YKR054C	DYN1
YDR424C::chr00_8	YDR424C	DYN2
YMR299C::chr13_5	YMR299C	DYN3
YDR359C::chr4_7	YDR359C	EAF1
YJR082C::chr10_4	YJR082C	EAF6
YNL136W::chr14_3	YNL136W	EAF7
YKL172W::chr11_2	YKL172W	EBP2
YDR206W::chr4_5	YDR206W	EBS1
YLR284C::chr12_4	YLR284C	ECI1
YGR146C::chr7_5	YGR146C	ECL1
YAL059W::chr1_1	YAL059W	ECM1
YHR021W-A::chr00_3	YHR021W-A	ECM12
YBL043W::chr2_1	YBL043W	ECM13
YBL001C::chr2_1	YBL001C	ECM15
YMR128W::chr00_9	YMR128W	ECM16
YBR065C::chr2_2	YBR065C	ECM2
YBL101C::chr2_2	YBL101C	ECM21
YLR228C::chr12_4	YLR228C	ECM22
YPL021W::chr16_3	YPL021W	ECM23
YJL201W::chr10_1	YJL201W	ECM25
YJR106W::chr00_12	YJR106W	ECM27
YHL030W::chr8_1	YHL030W	ECM29
YOR092W::chr15_1	YOR092W	ECM3
YLR436C::chr00_4	YLR436C	ECM30
YBR176W::chr2_4	YBR176W	ECM31
YBR078W::chr2_2	YBR078W	ECM33
YKR076W::chr00_3	YKR076W	ECM4
YMR176W::chr13_4	YMR176W	ECM5
YLR443W::chr00_4	YLR443W	ECM7
YBR076W::chr2_2	YBR076W	ECM8
YKR004C::chr00_14	YKR004C	ECM9
YGL222C::chr7_3	YGL222C	EDC1
YBL047C::chr2_1	YBL047C	EDE1
YBR033W::chr2_2	YBR033W	EDS1
YPL095C::chr16_2	YPL095C	EEB1
YAL003W::chr1_1	YAL003W	EFB1
YGR272C::chr00_17a	YGR271C-A	EFG1
YBR271W::chr00_1	YBR271W	EFM2
YOR133W::chr15_2	YOR133W	EFT1
YDR385W::chr4_7	YDR385W	EFT2
YPL037C::chr16_3	YPL037C	EGD1
YHR193C::chr00_8	YHR193C	EGD2
YBR177C::chr2_4	YBR177C	EHT1
YMR031C::chr13_2	YMR031C	EIS1
YDR147W::chr4_5	YDR147W	EKI1
YPL046C::chr16_3	YPL046C	ELC1
YKL160W::chr11_2	YKL160W	ELF1
YGR200C::chr7_5	YGR200C	ELP2
YPL086C::chr16_3	YPL086C	ELP3
YKL207W::chr11_3	YKL207W	EMC3
YGL231C::chr7_3	YGL231C	EMC4
YIL027C::chr9_1	YIL027C	EMC5
YLR186W::chr12_3	YLR186W	EMG1
YDR512C::chr00_17a	YDR512C	EMI1
YDR516C::chr4_8	YDR516C	EMI2
YGL200C::chr7_3	YGL200C	EMP24
YLR080W::chr12_2	YLR080W	EMP46
YFL048C::chr6_1	YFL048C	EMP47
YLR083C::chr12_2	YLR083C	EMP70
YNL313C::chr14_1	YNL313C	EMW1
YOL158C::chr00_10	YOL158C	ENB1
YNL084C::chr14_3	YNL084C	END3
YLR206W::chr12_3	YLR206W	ENT2
YLL038C::chr12_1	YLL038C	ENT4
YDR153C::chr4_5	YDR153C	ENT5
YGR071C::chr7_4	YGR071C	ENV11
YPL236C::chr16_1	YPL236C	ENV7
YNL080C::chr00_16b	YNL080C	EOS1
YFL024C::chr6_1	YFL024C	EPL1
YMR049C::chr00_5	YMR049C	ERB1
YDR414C::chr4_7	YDR414C	ERD1
YBL040C::chr2_1	YBL040C	ERD2
YHR007C::chr00_10	YHR007C	ERG11
YMR208W::chr13_4	YMR208W	ERG12
YJL167W::chr10_1	YJL167W	ERG20
YGR060W::chr7_4	YGR060W	ERG25
YER044C::chr5_3	YER044C	ERG28
YGL012W::chr7_1	YGL012W	ERG4
YMR015C::chr13_2	YMR015C	ERG5
YML008C::chr13_2	YML008C	ERG6
YHR072W::chr8_2	YHR072W	ERG7
YMR220W::chr13_4	YMR220W	ERG8
YHR190W::chr8_3	YHR190W	ERG9
YFR041C::chr00_2	YFR041C	ERJ5
YML130C::chr00_9	YML130C	ERO1
YAR002C-A::chr00_16a	YAR002C-A	ERP1
YAL007C::chr1_1	YAL007C	ERP2
YOR016C::chr15_1	YOR016C	ERP4
YHR110W::chr8_2	YHR110W	ERP5
YCR075C::chr00_16a	YCR075C	ERS1
YGR029W::chr7_4	YGR029W	ERV1
YML012W::chr13_2	YML012W	ERV25
YML067C::chr00_12	YML067C	ERV41
YAL042W::chr1_1	YAL042W	ERV46
YDR363W::chr4_7	YDR363W	ESC2
YDR365C::chr4_7	YDR365C	ESF1
YNR054C::chr00_4	YNR054C	ESF2
YJR017C::chr00_13	YJR017C	ESS1
YLR233C::chr12_4	YLR233C	EST1
YBR026C::chr2_2	YBR026C	ETR1
YOR051C::chr15_1	YOR051C	ETT1
YLR300W::chr12_4	YLR300W	EXG1
YDR261C::chr4_6	YDR261C	EXG2
YBR163W::chr2_3	YBR163W	EXO5
YJL085W::chr10_2	YJL085W	EXO70
YBR102C::chr2_3	YBR102C	EXO84
YIL009W::chr9_1	YIL009W	FAA3
YMR246W::chr13_5	YMR246W	FAA4
YDL045C::chr4_1	YDL045C	FAD1
YNL023C::chr14_4	YNL023C	FAP1
YLR238W::chr12_4	YLR238W	FAR10
YNL127W::chr14_3	YNL127W	FAR11
YMR029C::chr13_2	YMR029C	FAR8
YKL182W::chr11_2	YKL182W	FAS1
YBR041W::chr2_2	YBR041W	FAT1
YER183C::chr00_5	YER183C	FAU1
YLR377C::chr12_5	YLR377C	FBP1
YDR339C::chr4_7	YDR339C	FCF1
YLR051C::chr12_2	YLR051C	FCF2
YKR016W::chr11_3	YKR016W	FCJ1
YPR062W::chr16_4	YPR062W	FCY1
YER060W::chr5_3	YER060W	FCY21
YER060W-A::chr5_3	YER060W-A	FCY22
YBR101C::chr2_3	YBR101C	FES1
YMR058W::chr00_5	YMR058W	FET3
YBR040W::chr2_2	YBR040W	FIG1
YCR089W::chr00_16a	YCR089W	FIG2
YER032W::chr5_3	YER032W	FIR1
YOR382W::chr15_4	YOR382W	FIT2
YOR383C::chr15_4	YOR383C	FIT3
YNL068C::chr00_16b	YNL068C	FKH2
YLR342W::chr12_5	YLR342W	FKS1
YMR306W::chr00_8	YMR306W	FKS3
YAL053W::chr1_1	YAL053W	FLC2
YAR050W::chr00_12	YAR050W	FLO1
YKR102W::chr00_15	YKR102W	FLO10
YER108C::chr00_5	YER109C	FLO8
YER109C::chr00_5	YER109C	FLO8
YBR008C::chr2_2	YBR008C	FLR1
YIL134W::chr9_2	YIL134W	FLX1
YIL098C::chr9_2	YIL098C	FMC1
YDR236C::chr4_5	YDR236C	FMN1
YHR176W::chr8_3	YHR176W	FMO1
YER182W::chr00_5	YER182W	FMP10
YBR269C::chr00_1	YBR269C	FMP21
YBR047W::chr2_2	YBR047W	FMP23
YLR454W::chr00_4	YLR454W	FMP27
YPL103C::chr16_2	YPL103C	FMP30
YFL046W::chr6_1	YFL046W	FMP32
YJL161W::chr00_14	YJL161W	FMP33
YGR243W::chr00_2	YGR243W	FMP43
YKR049C::chr11_3	YKR049C	FMP46
YER004W::chr5_2	YER004W	FMP52
YMR020W::chr13_2	YMR020W	FMS1
YBL013W::chr2_1	YBL013W	FMT1
YNL256W::chr00_8	YNL256W	FOL1
YGR267C::chr00_3	YGR267C	FOL2
YMR113W::chr00_9	YMR113W	FOL3
YNL135C::chr14_3	YNL135C	FPR1
YML074C::chr00_9	YML074C	FPR3
YLR449W::chr00_4	YLR449W	FPR4
YGL220W::chr7_3	YGL220W	FRA2
YLR214W::chr12_3	YLR214W	FRE1
YKL220C::chr00_14	YKL220C	FRE2
YOR381W::chr15_4	YOR381W	FRE3
YNR060W::chr00_4	YNR060W	FRE4
YOL152W::chr00_17b/chr00_18	YOL152W	FRE7
YLR047C::chr12_2	YLR047C	FRE8
YPL141C::chr16_2	YPL141C	FRK1
YDR373W::chr4_7	YDR373W	FRQ1
YLR060W::chr12_2	YLR060W	FRS1
YFL022C::chr6_1	YFL022C	FRS2
YOR324C::chr15_4	YOR324C	FRT1
YAL028W::chr1_1	YAL028W	FRT2
YHR049W::chr8_2	YHR049W	FSH1
YER145C::chr00_5	YER145C	FTR1
YCR076C::chr00_1	YCR076C	FUB1
YBL042C::chr2_1	YBL042C	FUI1
YPL262W::chr16_1	YPL262W	FUM1
YAL035W::chr1_1	YAL035W	FUN12
YAL008W::chr1_1	YAL008W	FUN14
YAL034C::chr1_1	YAL034C	FUN19
YAL022C::chr1_1	YAL022C	FUN26
YAL019W::chr1_1	YAL019W	FUN30
YBR021W::chr2_2	YBR021W	FUR4
YMR232W::chr13_5	YMR232W	FUS2
YBL016W::chr2_1	YBL016W	FUS3
YIL097W::chr9_1	YIL097W	FYV10
YHR059W::chr00_10	YHR059W	FYV4
YNL133C::chr14_3	YNL133C	FYV6
YLR068W::chr12_2	YLR068W	FYV7
YGL254W::chr7_3	YGL254W	FZF1
YBR179C::chr2_4	YBR179C	FZO1
YLR088W::chr12_2	YLR088W	GAA1
YOR178C::chr15_2	YOR178C	GAC1
YBR020W::chr00_18	YBR020W	GAL1
YBR019C::chr2_2	YBR019C	GAL10
YLR081W::chr12_2	YLR081W	GAL2
YPL248C::chr16_1	YPL248C	GAL4
YBR018C::chr2_2	YBR018C	GAL7
YML051W::chr13_1b	YML051W	GAL80
YOL132W::chr00_6	YOL132W	GAS4
YFL021W::chr6_1	YFL021W	GAT1
YMR136W::chr00_12	YMR136W	GAT2
YCL011C::chr3_1	YCL011C	GBP2
YNL062C::chr14_3	YNL062C	GCD10
YJL125C::chr00_15	YJL125C	GCD14
YGR083C::chr7_4	YGR083C	GCD2
YDR211W::chr4_5	YDR211W	GCD6
YLR291C::chr12_4	YLR291C	GCD7
YGL195W::chr7_3	YGL195W	GCN1
YDR283C::chr4_6	YDR283C	GCN2
YGR252W::chr00_17a	YGR252W	GCN5
YPL075W::chr16_3	YPL075W	GCR1
YNL199C::chr14_2	YNL199C	GCR2
YAL044C::chr1_1	YAL044C	GCV3
YEL042W::chr5_2	YEL042W	GDA1
YPR184W::chr16_5	YPR184W	GDB1
YAL062W::chr1_1	YAL062W	GDH3
YER136W::chr00_5	YER136W	GDI1
YBR187W::chr2_4	YBR187W	GDT1
YJR040W::chr00_13	YJR040W	GEF1
YAL048C::chr1_1	YAL048C	GEM1
YHR100C::chr8_2	YHR100C	GEP4
YKR106W::chr00_17b	YKR106W	GEX2
YMR255W::chr13_5	YMR255W	GFD1
YDR358W::chr4_7	YDR358W	GGA1
YHR108W::chr8_2	YHR108W	GGA2
YDL198C::chr4_3	YDL198C	GGC1
YDR309C::chr4_6	YDR309C	GIC2
YMR135C::chr00_9	YMR135C	GID8
YEL003W::chr5_2	YEL003W	GIM4
YDR507C::chr4_8	YDR507C	GIN4
YBR045C::chr2_2	YBR045C	GIP1
YER054C::chr5_3	YER054C	GIP2
YAL031C::chr1_1	YAL031C	GIP4
YLR094C::chr12_2	YLR094C	GIS3
YML006C::chr13_2	YML006C	GIS4
YCR098C::chr00_2	YCR098C	GIT1
YEL011W::chr00_8	YEL011W	GLC3
YER107C::chr00_5	YER107C	GLE2
YJL137C::chr00_14	YJL137C	GLG2
YER040W::chr5_3	YER040W	GLN3
YML004C::chr13_2	YML004C	GLO1
YDR272W::chr4_6	YDR272W	GLO2
YOR040W::chr15_1	YOR040W	GLO4
YPL091W::chr16_3	YPL091W	GLR1
YDL171C::chr4_2	YDL171C	GLT1
YDR506C::chr4_8	YDR506C	GMC1
YLR445W::chr00_4	YLR445W	GMC2
YFL017C::chr6_1	YFL017C	GNA1
YHR183W::chr8_3	YHR183W	GND1
YOR320C::chr15_4	YOR320C	GNT1
YMR292W::chr13_5	YMR292W	GOT1
YHR005C::chr00_10	YHR005C	GPA1
YAL056W::chr1_1	YAL056W	GPB2
YGR216C::chr7_5	YGR216C	GPI1
YGL142C::chr7_2	YGL142C	GPI10
YDR302W::chr4_6	YDR302W	GPI11
YJR013W::chr00_13	YJR013W	GPI14
YNL038W::chr14_4	YNL038W	GPI15
YHR188C::chr00_21	YHR188C	GPI16
YDR434W::chr4_7	YDR434W	GPI17
YBR004C::chr2_2	YBR004C	GPI18
YPL076W::chr16_3	YPL076W	GPI2
YDR331W::chr4_6	YDR331W	GPI8
YOL056W::chr15_5	YOL056W	GPM3
YKR067W::chr00_3	YKR067W	GPT2
YHR104W::chr8_2	YHR104W	GRE3
YCL035C::chr00_11	YCL035C	GRX1
YER174C::chr00_5	YER174C	GRX4
YPL059W::chr16_3	YPL059W	GRX5
YBR014C::chr2_2	YBR014C	GRX7
YLR364W::chr12_5	YLR364W	GRX8
YGR032W::chr00_14	YGR032W	GSC2
YML048W::chr13_1b	YML048W	GSF2
YJL101C::chr00_15	YJL101C	GSH1
YLR293C::chr12_4	YLR293C	GSP1
YLR258W::chr12_4	YLR258W	GSY2
YDR221W::chr4_5	YDR221W	GTB1
YGR102C::chr7_4	YGR102C	GTF1
YML121W::chr00_9	YML121W	GTR1
YGL181W::chr7_2	YGL181W	GTS1
YIR038C::chr00_3	YIR038C	GTT1
YLL060C::chr12_1	YLL060C	GTT2
YPL189W::chr16_1	YPL189W	GUP2
YPL189W::chr00_11	YPL189W	GUP2
YGL245W::chr7_3	YGL245W	GUS1
YHL032C::chr8_1	YHL032C	GUT1
YMR192W::chr13_4	YMR192W	GYL1
YPR008W::chr00_15	YPR008W	HAA1
YPR005C::chr16_3	YPR005C	HAL1
YJL165C::chr00_14	YJL165C	HAL5
YGL237C::chr7_3	YGL237C	HAP2
YBL021C::chr2_1	YBL021C	HAP3
YMR290C::chr13_5	YMR290C	HAS1
YEL056W::chr5_2	YEL056W	HAT2
YDL223C::chr4_3	YDL223C	HBT1
YJL033W::chr10_2	YJL033W	HCA4
YCR065W::chr00_1	YCR065W	HCM1
YNL021W::chr14_4	YNL021W	HDA1
YPR179C::chr16_5	YPR179C	HDA3
YBL032W::chr2_1	YBL032W	HEK2
YDR232W::chr4_5	YDR232W	HEM1
YDR044W::chr4_3	YDR044W	HEM13
YOR176W::chr15_2	YOR176W	HEM15
YOR278W::chr15_3	YOR278W	HEM4
YMR293C::chr13_5	YMR293C	HER2
YMR110C::chr00_9	YMR110C	HFD1
YGL251C::chr7_3	YGL251C	HFM1
YBR009C::chr2_2	YBR009C	HHF1
YNL030W::chr14_4	YNL030W	HHF2
YPL127C::chr16_2	YPL127C	HHO1
YBR010W::chr2_2	YBR010W	HHT1
YNL031C::chr14_4	YNL031C	HHT2
YDR317W::chr4_6	YDR317W	HIM1
YBL008W::chr2_1	YBL008W	HIR1
YOR038C::chr15_1	YOR038C	HIR2
YER055C::chr5_3	YER055C	HIS1
YFR025C::chr00_15	YFR025C	HIS2
YIL116W::chr9_2	YIL116W	HIS5
YJR055W::chr00_17b	YJR055W	HIT1
YDR420W::chr4_7	YDR420W	HKR1
YDR528W::chr4_8	YDR528W	HLR1
YLR450W::chr00_4	YLR450W	HMG2
YOL095C::chr00_6	YOL095C	HMI1
YDR174W::chr00_14	YDR174W	HMO1
YBR034C::chr2_2	YBR034C	HMT1
YLR205C::chr12_3	YLR205C	HMX1
YDR305C::chr4_6	YDR305C	HNT2
YDL227C::ctrl_4	YDL227C	HO
YDL227C::ctrl_18	YDL227C	HO
YDL227C::ctrl_5	YDL227C	HO
YDL227C::ctrl_6	YDL227C	HO
YDL227C::ctrl_7	YDL227C	HO
YDL227C::ctrl_8	YDL227C	HO
YDL227C::ctrl_48	YDL227C	HO
YDL227C::ctrl_33	YDL227C	HO
YDL227C::ctrl_42	YDL227C	HO
YDL227C::ctrl_19	YDL227C	HO
YDL227C::ctrl_13	YDL227C	HO
YDL227C::ctrl_9	YDL227C	HO
YDL227C::ctrl_10	YDL227C	HO
YDL227C::ctrl_11	YDL227C	HO
YDL227C::ctrl_20	YDL227C	HO
YDL227C::ctrl_21	YDL227C	HO
YDL227C::ctrl_22	YDL227C	HO
YDL227C::ctrl_14	YDL227C	HO
YDL227C::ctrl_23	YDL227C	HO
YDL227C::ctrl_24	YDL227C	HO
YDL227C::ctrl_25	YDL227C	HO
YDL227C::ctrl_26	YDL227C	HO
YDL227C::ctrl_27	YDL227C	HO
YDL227C::ctrl_34	YDL227C	HO
YDL227C::ctrl_28	YDL227C	HO
YDL227C::ctrl_29	YDL227C	HO
YDL227C::ctrl_30	YDL227C	HO
YDL227C::ctrl_31	YDL227C	HO
YDL227C::ctrl_15	YDL227C	HO
YDL227C::ctrl_32	YDL227C	HO
YDL227C::ctrl_43	YDL227C	HO
YDL227C::ctrl_47	YDL227C	HO
YDL227C::ctrl_37	YDL227C	HO
YDL227C::ctrl_38	YDL227C	HO
YDL227C::ctrl_16	YDL227C	HO
YDL227C::ctrl_35	YDL227C	HO
YDL227C::ctrl_45	YDL227C	HO
YDL227C::ctrl_54	YDL227C	HO
YDL227C::ctrl_36	YDL227C	HO
YDL227C::ctrl_39	YDL227C	HO
YDL227C::ctrl_1	YDL227C	HO
YDL227C::ctrl_49	YDL227C	HO
YDL227C::ctrl_50	YDL227C	HO
YDL227C::ctrl_40	YDL227C	HO
YDL227C::ctrl_41	YDL227C	HO
YDL227C::ctrl_44	YDL227C	HO
YDL227C::ctrl_17	YDL227C	HO
YDL227C::ctrl_52	YDL227C	HO
YDL227C::ctrl_46	YDL227C	HO
YDL227C::ctrl_53	YDL227C	HO
YDL227C::ctrl_51	YDL227C	HO
YDL227C::ctrl_2	YDL227C	HO
YDL227C::ctrl_3	YDL227C	HO
YMR032W::chr13_2	YMR032W	HOF1
YER062C::chr5_3	YER062C	HOR2
YMR251W-A::chr13_5	YMR251W-A	HOR7
YGL194C::chr7_3	YGL194C	HOS2
YPL116W::chr16_2	YPL116W	HOS3
YIL112W::chr9_2	YIL112W	HOS4
YPR193C::chr16_5	YPR193C	HPA2
YIL110W::chr9_2	YIL110W	HPM1
YDR399W::chr4_7	YDR399W	HPT1
YNL004W::chr14_4	YNL004W	HRB1
YOL013C::chr15_5	YOL013C	HRD1
YLR207W::chr12_3	YLR207W	HRD3
YOL123W::chr00_6	YOL123W	HRP1
YDR291W::chr4_6	YDR291W	HRQ1
YOL133W::chr00_6	YOL133W	HRT1
YMR186W::chr13_4	YMR186W	HSC82
YHL002W::chr00_10	YHL002W	HSE1
YMR288W::chr13_5	YMR288W	HSH155
YKL138C-A::chr00_20	YKL138C-A	HSK3
YBR133C::chr2_3	YBR133C	HSL7
YOR020C::chr15_1	YOR020C	HSP10
YBR072W::chr2_2	YBR072W	HSP26
YDR171W::chr4_5	YDR171W	HSP42
YLR259C::chr12_4	YLR259C	HSP60
YDR258C::chr4_6	YDR258C	HSP78
YOL068C::chr15_5	YOL068C	HST1
YPL015C::chr16_3	YPL015C	HST2
YDR191W::chr4_5	YDR191W	HST4
YDR225W::chr4_5	YDR225W	HTA1
YBL003C::chr2_1	YBL003C	HTA2
YDR224C::chr00_21	YDR224C	HTB1
YBL002W::chr2_1	YBL002W	HTB2
YHR067W::chr00_10	YHR067W	HTD2
YOL012C::chr15_5	YOL012C	HTZ1
YGR268C::chr00_3	YGR268C	HUA1
YOR284W::chr15_3	YOR284W	HUA2
YNR032C-A::chr00_4	YNR032C-A	HUB1
YJR036C::chr00_13	YJR036C	HUL4
YGL168W::chr7_2	YGL168W	HUR1
YPL244C::chr16_1	YPL244C	HUT1
YER039C::chr5_3	YER039C	HVG1
YGL253W::chr7_3	YGL253W	HXK2
YHR094C::chr8_2	YHR094C	HXT1
YFL011W::chr6_1	YFL011W	HXT10
YNR072W::chr00_6	YNR072W	HXT17
YMR011W::chr13_2	YMR011W	HXT2
YDR345C::chr4_7	YDR345C	HXT3
YHR092C::chr8_2	YHR092C	HXT4
YHR096C::chr8_2	YHR096C	HXT5
YJL214W::chr10_1	YJL214W	HXT8
YIR037W::chr00_3	YIR037W	HYR1
YER065C::chr5_3	YER065C	ICL1
YPR006C::chr16_4	YPR006C	ICL2
YER078C::chr00_8	YER078C	ICP55
YLR099C::chr12_2	YLR099C	ICT1
YMR195W::chr13_4	YMR195W	ICY1
YPL250C::chr16_1	YPL250C	ICY2
YPL117C::chr16_2	YPL117C	IDI1
YLR174W::chr12_3	YLR174W	IDP2
YNL009W::chr14_4	YNL009W	IDP3
YFL013C::chr00_17a	YFL013C	IES1
YNL215W::chr14_2	YNL215W	IES2
YLR052W::chr00_8	YLR052W	IES3
YER092W::chr00_8	YER092W	IES5
YEL044W::chr5_2	YEL044W	IES6
YBR159W::chr2_3	YBR159W	IFA38
YLR223C::chr12_3	YLR223C	IFH1
YFR017C::chr6_1	YFR017C	IGD1
YHR132W-A::chr00_17b	YHR132W-A	IGO2
YBL076C::chr2_1	YBL076C	ILS1
YCL009C::chr3_1	YCL009C	ILV6
YLR432W::chr00_4	YLR432W	IMD3
YML056C::chr13_1b	YML056C	IMD4
YJL106W::chr10_2	YJL106W	IME2
YCR046C::chr00_16a	YCR046C	IMG1
YCR071C::chr00_1	YCR071C	IMG2
YLR309C::chr12_4	YLR309C	IMH1
YJL082W::chr10_2	YJL082W	IML2
YBR107C::chr2_3	YBR107C	IML3
YGR031W::chr7_4	YGR031W	IMO32
YMR035W::chr13_2	YMR035W	IMP2
YHR148W::chr8_3	YHR148W	IMP3
YNL075W::chr14_3	YNL075W	IMP4
YHR046C::chr8_2	YHR046C	INM1
YDR287W::chr4_6	YDR287W	INM2
YOL108C::chr00_6	YOL108C	INO4
YGL150C::chr7_2	YGL150C	INO80
YMR204C::chr13_4	YMR204C	INP1
YNL106C::chr00_16b	YNL106C	INP52
YOL065C::chr15_5	YOL065C	INP54
YLR095C::chr12_2	YLR095C	IOC2
YFR013W::chr6_1	YFR013W	IOC3
YFR013W::chr00_16b	YFR013W	IOC3
YMR044W::chr13_2	YMR044W	IOC4
YHR085W::chr8_2	YHR085W	IPI1
YDR315C::chr4_6	YDR315C	IPK1
YPL209C::chr16_1	YPL209C	IPL1
YPL242C::chr16_1	YPL242C	IQG1
YBR140C::chr2_3	YBR140C	IRA1
YOR013W::chr15_1	YOR013W	IRC11
YPL017C::chr16_3	YPL017C	IRC15
YLL033W::chr12_1	YLL033W	IRC19
YLR247C::chr12_4	YLR247C	IRC20
YIR036C::chr00_3	YIR036C	IRC24
YDR332W::chr4_6	YDR332W	IRC3
YFR038W::chr00_2	YFR038W	IRC5
YFR043C::chr00_2	YFR043C	IRC6
YHR079C::chr8_2	YHR079C	IRE1
YKR019C::chr00_14	YKR019C	IRS4
YPR067W::chr00_15	YPR067W	ISA2
YER180C::chr00_5	YER180C	ISC10
YER048W-A::chr00_2	YER048W-A	ISD11
YMR081C::chr00_6	YMR081C	ISF1
YPR106W::chr16_5	YPR106W	ISR1
YBR086C::chr2_3	YBR086C	IST2
YOR226C::chr15_3	YOR226C	ISU2
YOL103W::chr00_6	YOL103W	ITR2
YML068W::chr00_12	YML068W	ITT1
YKL032C::chr11_1	YKL032C	IXR1
YOL002C::chr15_5	YOL002C	IZH2
YLR023C::chr12_1	YLR023C	IZH3
YOL101C::chr00_6	YOL101C	IZH4
YLR331C::chr12_5	YLR331C	JIP3
YPR169W::chr16_5	YPR169W	JIP5
YNL227C::chr14_2	YNL227C	JJJ1
YLL057C::chr12_1	YLL057C	JLP1
YBR017C::chr2_2	YBR017C	KAP104
YGL241W::chr7_3	YGL241W	KAP114
YPL125W::chr16_2	YPL125W	KAP120
YJL034W::chr10_2	YJL034W	KAR2
YMR065W::chr00_6	YMR065W	KAR5
YFR042W::chr00_2	YFR042W	KEG1
YDR367W::chr4_7	YDR367W	KEI1
YHR158C::chr8_3	YHR158C	KEL1
YGR238C::chr00_14	YGR238C	KEL2
YPL263C::chr16_1	YPL263C	KEL3
YGL203C::chr7_3	YGL203C	KEX1
YNL238W::chr14_2	YNL238W	KEX2
YDR148C::chr4_5	YDR148C	KGD2
YJL094C::chr00_15	YJL094C	KHA1
YDR122W::chr4_4	YDR122W	KIN1
YLR096W::chr12_2	YLR096W	KIN2
YAR018C::chr1_1	YAR018C	KIN3
YOR233W::chr15_3	YOR233W	KIN4
YCR091W::chr00_2	YCR091W	KIN82
YBL063W::chr2_1	YBL063W	KIP1
YGL216W::chr7_3	YGL216W	KIP3
YKL168C::chr11_2	YKL168C	KKQ8
YDL049C::chr4_1	YDL049C	KNH1
YHR186C::chr8_3	YHR186C	KOG1
YNL132W::chr14_3	YNL132W	KRE33
YNL308C::chr14_1	YNL308C	KRI1
YNL024C-A::chr00_21	YNL024C-A	KSH1
YHR082C::chr8_2	YHR082C	KSP1
YGR040W::chr00_14	YGR040W	KSS1
YBR199W::chr2_4	YBR199W	KTR4
YPL053C::chr16_3	YPL053C	KTR6
YGL079W::chr7_1	YGL079W	KXD1
YJL207C::chr10_1	YJL207C	LAA1
YKL008C::chr11_1	YKL008C	LAC1
YHL003C::chr8_1	YHL003C	LAG1
YNL045W::chr14_4	YNL045W	LAP2
YOR181W::chr15_2	YOR181W	LAS17
YJL062W::chr10_2	YJL062W	LAS21
YNL071W::chr00_16b	YNL071W	LAT1
YLR260W::chr12_4	YLR260W	LCB5
YDR499W::chr4_8	YDR499W	LCD1
YPL056C::chr16_3	YPL056C	LCL1
YLR104W::chr12_2	YLR104W	LCL2
YER127W::chr00_5	YER127W	LCP5
YBL006C::chr2_1	YBL006C	LDB7
YPL213W::chr16_1	YPL213W	LEA1
YPL054W::chr16_3	YPL054W	LEE1
YOR123C::chr15_2	YOR123C	LEO1
YLR451W::chr12_3	YLR451W	LEU3
YNL104C::chr00_16b	YNL104C	LEU4
YOR108W::chr15_2	YOR108W	LEU9
YPL055C::chr16_3	YPL055C	LGE1
YKL073W::chr11_1	YKL073W	LHS1
YHR156C::chr8_3	YHR156C	LIN1
YMR298W::chr13_5	YMR298W	LIP1
YLR239C::chr12_4	YLR239C	LIP2
YOR196C::chr15_3	YOR196C	LIP5
YKL205W::chr11_3	YKL205W	LOS1
YKL183W::chr11_2	YKL183W	LOT5
YFR024C-A::chr6_1	YFR024C-A	LSB3
YJL100W::chr10_2	YJL100W	LSB6
YOR142W::chr15_2	YOR142W	LSC1
YGR244C::chr00_2	YGR244C	LSC2
YGL099W::chr7_2	YGL099W	LSG1
YBL026W::chr2_1	YBL026W	LSM2
YDR378C::chr4_7	YDR378C	LSM6
YNL147W::chr00_18	YNL147W	LSM7
YPL004C::chr00_17b	YPL004C	LSP1
YNL006W::chr14_4	YNL006W	LST8
YAL024C::chr00_17a	YAL024C	LTE1
YNL268W::chr00_18	YNL268W	LYP1
YNL268W::chr14_1	YNL268W	LYP1
YIL094C::chr9_1	YIL094C	LYS12
YDR034C::chr4_3	YDR034C	LYS14
YBR115C::chr2_3	YBR115C	LYS2
YGL154C::chr7_2	YGL154C	LYS5
YNR050C::chr00_4	YNR050C	LYS9
YMR021C::chr13_2	YMR021C	MAC1
YJL030W::chr10_2	YJL030W	MAD2
YJL013C::chr00_13	YJL013C	MAD3
YAL025C::chr1_1	YAL025C	MAK16
YBR142W::chr2_3	YBR142W	MAK5
YGR288W::chr00_3	YGR288W	MAL13
YBR299W::chr00_17a	YBR299W	MAL32
YOL060C::chr15_5	YOL060C	MAM3
YBL091C::chr2_1	YBL091C	MAP2
YLR163C::chr12_3	YLR163C	MAS1
YHR024C::chr8_1	YHR024C	MAS2
YBR185C::chr2_4	YBR185C	MBA1
YJL199C::chr10_1	YJL199C	MBB1
YOR298C-A::chr00_11	YOR298C-A	MBF1
YDL054C::chr4_1	YDL054C	MCH1
YKL221W::chr11_3	YKL221W	MCH2
YOL119C::chr00_6	YOL119C	MCH4
YOR306C::chr15_4/chr00_8	YOR306C	MCH5
YNL307C::chr14_1	YNL307C	MCK1
YMR043W::chr13_2	YMR043W	MCM1
YIL150C::chr9_2	YIL150C	MCM10
YBL023C::chr2_1	YBL023C	MCM2
YDR318W::chr4_6	YDR318W	MCM21
YPR019W::chr16_4	YPR019W	MCM4
YGL201C::chr7_3	YGL201C	MCM6
YJR024C::chr00_13	YJR024C	MDE1
YKL085W::chr11_1	YKL085W	MDH1
YFL016C::chr00_17a	YFL016C	MDJ1
YLR188W::chr12_3	YLR188W	MDL1
YML104C::chr00_9	YML104C	MDM1
YAL010C::chr1_1	YAL010C	MDM10
YLR368W::chr12_5	YLR368W	MDM30
YGL219C::chr00_14	YGL219C	MDM34
YKL053C-A::chr00_17b	YKL053C-A	MDM35
YOL027C::chr15_5	YOL027C	MDM38
YLR106C::chr12_2	YLR106C	MDN1
YGL197W::chr7_3	YGL197W	MDS3
YOL111C::chr00_6	YOL111C	MDY2
YBR136W::chr2_3	YBR136W	MEC1
YLR288C::chr12_4	YLR288C	MEC3
YMR112C::chr00_9	YMR112C	MED11
YHR058C::chr00_10	YHR058C	MED6
YBR193C::chr2_4	YBR193C	MED8
YJL102W::chr10_2	YJL102W	MEF2
YKR007W::chr11_3	YKR007W	MEH1
YPL121C::chr16_2	YPL121C	MEI5
YOR351C::chr15_4	YOR351C	MEK1
YNL142W::chr00_17b	YNL142W	MEP2
YPR138C::chr16_5	YPR138C	MEP3
YNL210W::chr14_2	YNL210W	MER1
YKR069W::chr00_3	YKR069W	MET1
YFR030W::chr00_15	YFR030W	MET10
YPL023C::chr16_3	YPL023C	MET12
YLR303W::chr12_4	YLR303W	MET17
YNL277W::chr14_1	YNL277W	MET2
YOL064C::chr15_5	YOL064C	MET22
YIR017C::chr00_3	YIR017C	MET28
YJR010W::chr00_13	YJR010W	MET3
YPL038W::chr16_3	YPL038W	MET31
YDR253C::chr4_6	YDR253C	MET32
YNL103W::chr00_18	YNL103W	MET4
YER091C::chr00_8	YER091C	MET6
YPL187W::chr16_2	YPL187W	MF(ALPHA)1
YDR461W::chr00_17a	YDR461W	MFA1
YNL145W::chr14_3	YNL145W	MFA2
YDR219C::chr4_5	YDR219C	MFB1
YPL060W::chr16_3	YPL060W	MFM1
YML062C::chr13_1b	YML062C	MFT1
YGR249W::chr00_2	YGR249W	MGA1
YIR033W::chr00_3	YIR033W	MGA2
YMR115W::chr00_9	YMR115W	MGR3
YJR008W::chr00_13	YJR008W	MHO1
YJL042W::chr00_15	YJL042W	MHP1
YDR296W::chr4_6	YDR296W	MHR1
YLL062C::chr12_1	YLL062C	MHT1
YKL195W::chr00_14	YKL195W	MIA40
YMR002W::chr13_2	YMR002W	MIC17
YLR332W::chr12_5	YLR332W	MID2
YGL209W::chr7_3	YGL209W	MIG2
YMR036C::chr13_2	YMR036C	MIH1
YLR099W-A::chr00_21	YLR099W-A	MIM2
YBR084W::chr2_3	YBR084W	MIS1
YEL007W::chr5_2	YEL007W	MIT1
YPL140C::chr16_2	YPL140C	MKK2
YNL076W::chr00_16b	YNL076W	MKS1
YNL085W::chr00_16b	YNL085W	MKT1
YNL074C::chr00_16b	YNL074C	MLF3
YMR167W::chr13_4	YMR167W	MLH1
YLR035C::chr00_8	YLR035C	MLH2
YKR095W::chr00_15	YKR095W	MLP1
YIL149C::chr9_2	YIL149C	MLP2
YNL117W::chr14_3	YNL117W	MLS1
YIL051C::chr9_1	YIL051C	MMF1
YLL006W::chr12_1	YLL006W	MMM1
YLR190W::chr12_3	YLR190W	MMR1
YPR164W::chr16_5	YPR164W	MMS1
YGL087C::chr7_1	YGL087C	MMS2
YBR098W::chr2_3	YBR098W	MMS4
YBR100W::chr2_3/chr00_16a	YBR098W	MMS4
YIR025W::chr00_3	YIR025W	MND2
YHR204W::chr8_3	YHR204W	MNL1
YDR245W::chr4_6	YDR245W	MNN10
YBR015C::chr2_2	YBR015C	MNN2
YKL200C::chr11_3	YKL201C	MNN4
YPL050C::chr16_3	YPL050C	MNN9
YKL064W::chr11_1	YKL064W	MNR2
YGL257C::chr7_3	YGL257C	MNT2
YIL014W::chr9_1	YIL014W	MNT3
YNR059W::chr00_4	YNR059W	MNT4
YIL106W::chr9_2	YIL106W	MOB1
YBL049W::chr2_1	YBL049W	MOH1
YGR235C::chr00_2	YGR235C	MOS2
YPL082C::chr16_3	YPL082C	MOT1
YMR070W::chr00_6	YMR070W	MOT3
YHR162W::chr00_8	YHR162W	MPC2
YOL088C::chr00_6	YOL088C	MPD2
YKL059C::chr11_1	YKL059C	MPE1
YIR002C::chr9_2	YIR002C	MPH1
YJL066C::chr10_2	YJL066C	MPM1
YJR002W::chr00_13	YJR002W	MPP10
YNR024W::chr14_4	YNR024W	MPP6
YPR112C::chr16_5	YPR112C	MRD1
YGL143C::chr7_2	YGL143C	MRF1
YOR201C::chr15_3	YOR201C	MRM1
YGL136C::chr7_2	YGL136C	MRM2
YPL184C::chr16_2	YPL184C	MRN1
YDR347W::chr4_7	YDR347W	MRP1
YKL003C::chr11_1	YKL003C	MRP17
YDR405W::chr4_7	YDR405W	MRP20
YBL090W::chr2_1	YBL090W	MRP21
YPL118W::chr16_2	YPL118W	MRP51
YKL142W::chr11_2	YKL142W	MRP8
YNL284C::chr00_18	YNL284C	MRPL10
YKR006C::chr11_3	YKR006C	MRPL13
YLR312W-A::chr12_4	YLR312W-A	MRPL15
YBL038W::chr2_1	YBL038W	MRPL16
YKR085C::chr00_15	YKR085C	MRPL20
YBR282W::chr00_1	YBR282W	MRPL27
YMR024W::chr13_2	YMR024W	MRPL3
YCR003W::chr3_1	YCR003W	MRPL32
YMR286W::chr13_5	YMR286W	MRPL33
YDR322W::chr4_6	YDR322W	MRPL35
YML009C::chr00_4	YML009C	MRPL39
YML009C::chr13_2	YML009C	MRPL39
YPL173W::chr16_2	YPL173W	MRPL40
YMR225C::chr13_4	YMR225C	MRPL44
YJL096W::chr10_2	YJL096W	MRPL49
YHR147C::chr8_3	YHR147C	MRPL6
YDR237W::chr4_5	YDR237W	MRPL7
YPL013C::chr16_3	YPL013C	MRPS16
YMR188C::chr13_4	YMR188C	MRPS17
YDR337W::chr4_6	YDR337W	MRPS28
YMR158W::chr00_8	YMR158W	MRPS8
YBR146W::chr2_3	YBR146W	MRPS9
YIR021W::chr00_3	YIR021W	MRS1
YKR052C::chr11_3	YKR052C	MRS4
YKR077W::chr00_3	YKR077W	MSA2
YNL293W::chr14_1	YNL293W	MSB3
YOL112W::chr00_6	YOL112W	MSB4
YML128C::chr00_9	YML128C	MSC1
YDR205W::chr00_14	YDR205W	MSC2
YLR219W::chr12_3	YLR219W	MSC3
YOR354C::chr15_4	YOR354C	MSC6
YPL104W::chr16_2	YPL104W	MSD1
YOL033W::chr15_5	YOL033W	MSE1
YPR047W::chr16_4	YPR047W	MSF1
YOL090W::chr00_6	YOL090W	MSH2
YBR195C::chr2_4	YBR195C	MSI1
YNL073W::chr00_16b	YNL073W	MSK1
YLR116W::chr12_2	YLR116W	MSL5
YOL116W::chr00_6	YOL116W	MSN1
YKL062W::chr11_1	YKL062W	MSN4
YDR335W::chr4_6	YDR335W	MSN5
YNR049C::chr14_4	YNR049C	MSO1
YGR028W::chr00_14	YGR028W	MSP1
YHR091C::chr8_2	YHR091C	MSR1
YMR023C::chr13_2	YMR023C	MSS1
YDR194C::chr4_5	YDR194C	MSS116
YDR208W::chr4_5	YDR208W	MSS4
YKL194C::chr00_14	YKL194C	MST1
YDR268W::chr4_6	YDR268W	MSW1
YGL226W::chr7_3	YGL226W	MTC3
YHR151C::chr8_3	YHR151C	MTC6
YKR080W::chr00_3	YKR080W	MTD1
YMR228W::chr13_4	YMR228W	MTF1
YDL044C::chr4_1	YDL044C	MTF2
YMR097C::chr00_9	YMR097C	MTG1
YHR168W::chr00_8	YHR168W	MTG2
YDR277C::chr4_6	YDR277C	MTH1
YGR257C::chr00_17a	YGR257C	MTM1
YGL236C::chr7_3	YGL236C	MTO1
YNL063W::chr14_3	YNL063W	MTQ1
YDR140W::chr4_4	YDR140W	MTQ2
YGR158C::chr7_5	YGR158C	MTR3
YAL034W-A::chr1_1	YAL034W-A	MTW1
YIR019C::chr00_3	YIR019C	MUC1
YBR119W::chr2_3	YBR119W	MUD1
YPL070W::chr16_3	YPL070W	MUK1
YBR057C::chr2_2	YBR057C	MUM2
YDR386W::chr4_7	YDR386W	MUS81
YNR043W::chr14_4	YNR043W	MVD1
YHR023W::chr00_10	YHR023W	MYO1
YAL029C::chr1_1	YAL029C	MYO4
YMR109W::chr00_9	YMR109W	MYO5
YPL190C::chr16_1	YPL190C	NAB3
YNL124W::chr14_3	YNL124W	NAF1
YLR382C::chr00_11	YLR382C	NAM2
YMR080C::chr00_6	YMR080C	NAM7
YNL137C::chr00_16b	YNL137C	NAM9
YPL126W::chr16_2	YPL126W	NAN1
YNL240C::chr14_2	YNL240C	NAR1
YPR131C::chr16_5	YPR131C	NAT3
YMR069W::chr00_6	YMR069W	NAT4
YOL070C::chr15_5	YOL070C	NBA1
YLR457C::chr00_15	YLR457C	NBP1
YDR162C::chr4_5	YDR162C	NBP2
YDR397C::chr4_7	YDR397C	NCB2
YPR149W::chr16_5	YPR149W	NCE102
YBL024W::chr2_1	YBL024W	NCL1
YHR042W::chr8_1	YHR042W	NCP1
YPL006W::chr16_3	YPL006W	NCR1
YNL119W::chr00_16b	YNL119W	NCS2
YGL211W::chr7_3	YGL211W	NCS6
YML031W::chr00_12	YML031W	NDC1
YMR145C::chr13_4	YMR145C	NDE1
YML120C::chr00_9	YML120C	NDI1
YLR254C::chr12_4	YLR254C	NDL1
YLR265C::chr12_4	YLR265C	NEJ1
YHR004C::chr00_10	YHR004C	NEM1
YPL226W::chr16_1	YPL226W	NEW1
YKR103W::chr00_4	YKR103W	NFT1
YDR176W::chr4_5	YDR176W	NGG1
YLR138W::chr12_3	YLR138W	NHA1
YBR090C-A::chr2_3	YBR089C-A	NHP6B
YGL221C::chr7_3	YGL221C	NIF3
YMR309C::chr13_5	YMR309C	NIP1
YPL174C::chr16_2	YPL174C	NIP100
YNL078W::chr00_16b	YNL078W	NIS1
YIL164C::chr9_2	YIL164C	NIT1
YJL126W::chr10_2	YJL126W	NIT2
YLR351C::chr12_5	YLR351C	NIT3
YDR383C::chr4_7	YDR383C	NKP1
YLR315W::chr12_4	YLR315W	NKP2
YNL123W::chr14_3	YNL123W	NMA111
YHR077C::chr8_2	YHR077C	NMD2
YHR170W::chr00_8	YHR170W	NMD3
YLR363C::chr12_5	YLR363C	NMD4
YLR195C::chr12_3	YLR195C	NMT1
YLR285W::chr12_4	YLR285W	NNT1
YLR002C::chr12_1	YLR002C	NOC3
YNR053C::chr00_4	YNR053C	NOG2
YHR072W-A::chr00_20	YHR072W-A	NOP10
YNL110C::chr14_3	YNL110C	NOP15
YER002W::chr5_2	YER002W	NOP16
YNL061W::chr00_16b	YNL061W	NOP2
YPL043W::chr16_3	YPL043W	NOP4
YLR197W::chr12_3	YLR197W	NOP56
YOR310C::chr15_4	YOR310C	NOP58
YDL213C::chr4_3	YDL213C	NOP6
YJL010C::chr00_13	YJL010C	NOP9
YIL038C::chr9_1	YIL038C	NOT3
YDR432W::chr4_7	YDR432W	NPL3
YBR170C::chr2_3	YBR170C	NPL4
YMR091C::chr00_6	YMR091C	NPL6
YEL062W::chr5_2	YEL062W	NPR2
YHL023C::chr8_1	YHL023C	NPR3
YGR043C::chr7_4	YGR043C	NQM1
YBR066C::chr2_2	YBR066C	NRG2
YNL129W::chr14_3	YNL129W	NRK1
YNR009W::chr14_4	YNR009W	NRM1
YOR071C::chr15_1	YOR071C	NRT1
YLR007W::chr12_1	YLR007W	NSE1
YDR288W::chr4_6	YDR288W	NSE3
YML023C::chr00_11	YML023C	NSE5
YML023C::chr13_2	YML023C	NSE5
YHR133C::chr8_2	YHR133C	NSG1
YNL156C::chr14_2	YNL156C	NSG2
YNL091W::chr00_16b	YNL091W	NST1
YBR188C::chr2_4	YBR188C	NTC20
YML059C::chr13_1b	YML059C	NTE1
YER009W::chr5_2	YER009W	NTF2
YAL015C::chr1_1	YAL015C	NTG1
YOL043C::chr15_5	YOL043C	NTG2
YBR001C::chr2_2	YBR001C	NTH2
YPR031W::chr00_15	YPR031W	NTO1
YOL069W::chr15_5	YOL069W	NUF2
YER006W::chr5_2	YER006W	NUG1
YKL068W::chr11_1	YKL068W	NUP100
YMR047C::chr00_16b	YMR047C	NUP116
YMR047C::chr13_2	YMR047C	NUP116
YKL057C::chr11_1	YKL057C	NUP120
YIL115C::chr9_2	YIL115C	NUP159
YBL079W::chr2_1	YBL079W	NUP170
YML103C::chr00_9	YML103C	NUP188
YJL039C::chr10_2	YJL039C	NUP192
YLR335W::chr12_5	YLR335W	NUP2
YDR192C::chr4_5	YDR192C	NUP42
YAR002W::chr1_1	YAR002W	NUP60
YJL061W::chr10_2	YJL061W	NUP82
YGL151W::chr7_2	YGL151W	NUT1
YPR168W::chr16_5	YPR168W	NUT2
YHR195W::chr8_3	YHR195W	NVJ1
YPR091C::chr00_18	YPR091C	NVJ2
YLR093C::chr12_2	YLR093C	NYV1
YKL120W::chr11_2	YKL120W	OAC1
YAL051W::chr1_1	YAL051W	OAF1
YPL052W::chr16_3	YPL052W	OAZ1
YNL099C::chr00_16b	YNL099C	OCA1
YNL056W::chr00_16b	YNL056W	OCA2
YCR095C::chr00_14	YCR095C	OCA4
YKL134C::chr11_2	YKL134C	OCT1
YPL134C::chr00_8	YPL134C	ODC1
YML060W::chr13_1b	YML060W	OGG1
YGR179C::chr7_5	YGR179C	OKP1
YBR025C::chr2_2	YBR025C	OLA1
YIL136W::chr9_2	YIL136W	OM45
YKR087C::chr00_4	YKR087C	OMA1
YDR316W::chr4_6	YDR316W	OMS1
YHL020C::chr8_1	YHL020C	OPI1
YOL032W::chr15_5	YOL032W	OPI10
YPR044C::chr16_4	YPR044C	OPI11
YDR360W::chr4_7	YDR360W	OPI7
YLR338W::chr12_5	YLR338W	OPI9
YPR194C::chr16_5	YPR194C	OPT2
YBR129C::chr2_3	YBR129C	OPY1
YML065W::chr13_1b	YML065W	ORC1
YBR060C::chr2_2	YBR060C	ORC2
YLL004W::chr12_1	YLL004W	ORC3
YGR038W::chr00_14	YGR038W	ORM1
YLR350W::chr12_5	YLR350W	ORM2
YHR073W::chr8_2	YHR073W	OSH3
YJR051W::chr00_13	YJR051W	OSM1
YJL002C::chr00_13	YJL002C	OST1
YOR085W::chr15_1	YOR085W	OST3
YGL226C-A::chr7_3	YGL226C-A	OST5
YML019W::chr13_2	YML019W	OST6
YLR054C::chr12_2	YLR054C	OSW2
YFL044C::chr6_1	YFL044C	OTU1
YHL013C::chr8_1	YHL013C	OTU2
YER154W::chr00_5	YER154W	OXA1
YKL215C::chr00_14	YKL215C	OXP1
YHR179W::chr8_3	YHR179W	OYE2
YPL171C::chr16_2	YPL171C	OYE3
YDR071C::chr00_11	YDR071C	PAA1
YER165W::chr00_5	YER165W	PAB1
YER007W::chr5_2	YER007W	PAC2
YDR538W::chr00_2	YDR538W	PAD1
YBR279W::chr00_1	YBR279W	PAF1
YMR174C::chr13_4	YMR174C	PAI3
YDR348C::chr4_7	YDR348C	PAL1
YDR251W::chr4_6	YDR251W	PAM1
YOL115W::chr00_6	YOL115W	PAP2
YGL261C::chr7_3	YGL261C	PAU11
YHL046C::chr8_1	YHL046C	PAU13
YLR037C::chr00_8	YLR037C	PAU23
YAR020C::chr1_1	YAR020C	PAU7
YAL068C::chr1_1	YAL068C	PAU8
YLR199C::chr12_3	YLR199C	PBA1
YCL052C::chr3_1	YCL052C	PBN1
YGR178C::chr7_5	YGR178C	PBP1
YBR094W::chr2_3	YBR094W	PBY1
YBR295W::chr00_1	YBR295W	PCA1
YLR151C::chr12_3	YLR151C	PCD1
YDR228C::chr4_5	YDR228C	PCF11
YBR186W::chr2_4	YBR186W	PCH2
YKR097W::chr00_4	YKR097W	PCK1
YER059W::chr5_3	YER059W	PCL6
YLR044C::chr12_2	YLR044C	PDC1
YLR134W::chr12_3	YLR134W	PDC5
YGR087C::chr7_4	YGR087C	PDC6
YGL248W::chr7_3	YGL248W	PDE1
YOR360C::chr15_4	YOR360C	PDE2
YPR002W::chr16_3	YPR002W	PDH1
YPL058C::chr16_3	YPL058C	PDR12
YDR406W::chr4_7	YDR406W	PDR15
YNL264C::chr14_1	YNL264C	PDR17
YBL005W::chr2_1	YBL005W	PDR3
YLR266C::chr12_4	YLR266C	PDR8
YGR193C::chr7_5	YGR193C	PDX1
YBR035C::chr2_2	YBR035C	PDX3
YER149C::chr00_5	YER149C	PEA2
YBL017C::chr2_1	YBL017C	PEP1
YLR148W::chr12_3	YLR148W	PEP3
YDR323C::chr4_6	YDR323C	PEP7
YJL053W::chr10_2	YJL053W	PEP8
YKR046C::chr00_14	YKR046C	PET10
YMR257C::chr13_5	YMR257C	PET111
YBL080C::chr2_1	YBL080C	PET112
YER058W::chr5_3	YER058W	PET117
YER153C::chr00_5	YER153C	PET122
YJL023C::chr00_13	YJL023C	PET130
YJR034W::chr00_13	YJR034W	PET191
YLR067C::chr12_2	YLR067C	PET309
YNR045W::chr14_4	YNR045W	PET494
YNL003C::chr14_4	YNL003C	PET8
YBL030C::chr2_1	YBL030C	PET9
YDR265W::chr4_6	YDR265W	PEX10
YMR026C::chr13_2	YMR026C	PEX12
YOL044W::chr15_5	YOL044W	PEX15
YHR160C::chr8_3	YHR160C	PEX18
YAL055W::chr1_1	YAL055W	PEX22
YHR150W::chr8_3	YHR150W	PEX28
YDR329C::chr4_6	YDR329C	PEX3
YGR004W::chr7_3	YGR004W	PEX31
YBR168W::chr00_16a	YBR168W	PEX32
YGR133W::chr7_5	YGR133W	PEX4
YDR244W::chr4_6	YDR244W	PEX5
YNL329C::chr14_1	YNL329C	PEX6
YNL326C::chr14_1	YNL326C	PFA3
YGR240C::chr00_2	YGR240C	PFK1
YMR205C::chr13_4	YMR205C	PFK2
YIL107C::chr9_2	YIL107C	PFK26
YOL136C::chr00_6	YOL136C	PFK27
YHR185C::chr00_10	YHR185C	PFS1
YNL317W::chr14_1	YNL317W	PFS2
YOR122C::chr15_2	YOR122C	PFY1
YNL158W::chr14_2	YNL158W	PGA1
YML125C::chr00_9	YML125C	PGA3
YPL206C::chr16_1	YPL206C	PGC1
YBR196C::chr2_4	YBR196C	PGI1
YKL127W::chr11_2	YKL127W	PGM1
YMR105C::chr00_9	YMR105C	PGM2
YGR231C::chr00_2	YGR231C	PHB2
YDR281C::chr4_6	YDR281C	PHM6
YOL084W::chr15_5	YOL084W	PHM7
YNL097C::chr00_16b	YNL097C	PHO23
YBR092C::chr2_3	YBR092C	PHO3
YFR034C::chr00_2	YFR034C	PHO4
YBR093C::chr2_3	YBR093C	PHO5
YGR233C::chr00_2	YGR233C	PHO81
YML123C::chr00_9	YML123C	PHO84
YPL031C::chr16_3	YPL031C	PHO85
YCR037C::chr00_1	YCR037C	PHO87
YBR106W::chr2_3	YBR106W	PHO88
YBR296C::chr00_1	YBR296C	PHO89
YNR013C::chr14_4	YNR013C	PHO91
YOR386W::chr15_5	YOR386W	PHR1
YDR313C::chr4_6	YDR313C	PIB1
YER053C::chr5_3	YER053C	PIC2
YML061C::chr13_1b	YML061C	PIF1
YGR086C::chr00_14	YGR086C	PIL1
YBL022C::chr2_1	YBL022C	PIM1
YOR104W::chr15_2	YOR104W	PIN2
YPR154W::chr16_5	YPR154W	PIN3
YBL051C::chr2_1	YBL051C	PIN4
YKL164C::chr11_2	YKL164C	PIR1
YKL163W::chr11_2	YKL163W	PIR3
YPR113W::chr16_5	YPR113W	PIS1
YDR490C::chr4_8	YDR490C	PKH1
YIL042C::chr9_1	YIL042C	PKP1
YMR123W::chr00_9	YMR123W	PKR1
YMR008C::chr13_2	YMR008C	PLB1
YMR006C::chr13_2	YMR006C	PLB2
YOL011W::chr15_5	YOL011W	PLB3
YDR501W::chr4_8	YDR501W	PLM2
YDR183W::chr4_5	YDR183W	PLP1
YPL036W::chr00_17b	YPL036W	PMA2
YER132C::chr00_5	YER132C	PMD1
YLR016C::chr12_1	YLR016C	PML1
YML107C::chr00_9	YML107C	PML39
YCR024C-A::chr00_1	YCR024C-A	PMP1
YDR276C::chr4_6	YDR276C	PMP3
YNL082W::chr00_16b	YNL082W	PMS1
YAL023C::chr1_1	YAL023C	PMT2
YOR321W::chr15_4	YOR321W	PMT3
YPL096W::chr16_2	YPL096W	PNG1
YLR209C::chr12_3	YLR209C	PNP1
YBR022W::chr2_2	YBR022W	POA1
YNL102W::chr14_3	YNL102W	POL1
YBL035C::chr2_1	YBL035C	POL12
YJR006W::chr00_13	YJR006W	POL31
YMR129W::chr00_9	YMR129W	POM152
YNL221C::chr14_2	YNL221C	POP1
YNL282W::chr14_1	YNL282W	POP3
YAL033W::chr1_1	YAL033W	POP5
YGR030C::chr7_4	YGR030C	POP6
YBR167C::chr2_3	YBR167C	POP7
YBL018C::chr2_1	YBL018C	POP8
YNL055C::chr00_18	YNL055C	POR1
YIL114C::chr9_2	YIL114C	POR2
YPL188W::chr16_1	YPL188W	POS5
YGL205W::chr7_3	YGL205W	POX1
YNR032W::chr14_4	YNR032W	PPG1
YDL188C::chr4_2	YDL188C	PPH22
YDR435C::chr4_7	YDR435C	PPM1
YLR014C::chr12_1	YLR014C	PPR1
YGR123C::chr7_5	YGR123C	PPT1
YPL148C::chr00_11	YPL148C	PPT2
YML016C::chr13_2	YML016C	PPZ1
YDR436W::chr4_7	YDR436W	PPZ2
YEL060C::chr5_2	YEL060C	PRB1
YMR297W::chr13_5	YMR297W	PRC1
YER012W::chr5_2	YER012W	PRE1
YPR103W::chr16_4	YPR103W	PRE2
YJL001W::chr00_13	YJL001W	PRE3
YFR050C::chr00_2	YFR050C	PRE4
YMR314W::chr00_8	YMR314W	PRE5
YOL038W::chr15_5	YOL038W	PRE6
YBL041W::chr2_1	YBL041W	PRE7
YML092C::chr00_9	YML092C	PRE8
YIL095W::chr9_1	YIL095W	PRK1
YPL192C::chr16_1	YPL192C	PRM3
YPL156C::chr16_2	YPL156C	PRM4
YIL117C::chr9_2	YIL117C	PRM5
YML047C::chr00_11	YML047C	PRM6
YAR031W::chr1_1	YAR031W	PRM9
YDR300C::chr4_6	YDR300C	PRO1
YOR323C::chr15_4	YOR323C	PRO2
YKR086W::chr00_4	YKR086W	PRP16
YGR006W::chr7_3	YGR006W	PRP18
YJL203W::chr10_1	YJL203W	PRP21
YDR243C::chr4_6	YDR243C	PRP28
YGR075C::chr7_4	YGR075C	PRP38
YML046W::chr00_12	YML046W	PRP39
YPR178W::chr16_5	YPR178W	PRP4
YDR235W::chr4_5	YDR235W	PRP42
YAL032C::chr1_1	YAL032C	PRP45
YPL151C::chr16_2	YPL151C	PRP46
YBR055C::chr2_2	YBR055C	PRP6
YHL011C::chr00_10	YHL011C	PRS3
YBL068W::chr2_1	YBL068W	PRS4
YBL064C::chr2_1	YBL064C	PRX1
YKR013W::chr11_3	YKR013W	PRY2
YMR308C::chr13_5	YMR308C	PSE1
YOL054W::chr15_5	YOL054W	PSH1
YAL017W::chr1_1	YAL017W	PSK1
YML017W::chr13_2	YML017W	PSP2
YDR055W::chr4_4	YDR055W	PST1
YNL201C::chr14_2	YNL201C	PSY2
YBL046W::chr2_1	YBL046W	PSY4
YAL043C::chr1_1	YAL043C	PTA1
YBL056W::chr2_1	YBL056W	PTC3
YBR125C::chr00_16a	YBR125C	PTC4
YHR189W::chr8_3	YHR189W	PTH1
YBL057C::chr2_1	YBL057C	PTH2
YKL199C::chr11_3	YKL198C	PTK1
YKL198C::chr11_3	YKL198C	PTK1
YJR059W::chr00_13	YJR059W	PTK2
YKL039W::chr11_1	YKL039W	PTM1
YDL230W::chr4_3	YDL230W	PTP1
YFR029W::chr00_15	YFR029W	PTR3
YGR253C::chr00_3	YGR253C	PUP2
YER094C::chr00_8	YER094C	PUP3
YLR165C::chr12_3	YLR165C	PUS5
YLR142W::chr12_3	YLR142W	PUT1
YLR196W::chr12_3	YLR196W	PWP1
YCR057C::chr00_16a	YCR057C	PWP2
YPL147W::chr16_2	YPL147W	PXA1
YKL188C::chr11_2	YKL188C	PXA2
YGR280C::chr00_3	YGR280C	PXR1
YOR347C::chr15_4	YOR347C	PYK2
YPR186C::chr16_5	YPR186C	PZF1
YJL166W::chr10_1	YJL166W	QCR8
YGR183C::chr7_5	YGR183C	QCR9
YIL121W::chr9_2	YIL121W	QDR2
YBR043C::chr2_2	YBR043C	QDR3
YLR204W::chr12_3	YLR204W	QRI5
YPL022W::chr16_3	YPL022W	RAD1
YML095C::chr00_9	YML095C	RAD10
YMR201C::chr13_4	YMR201C	RAD14
YBR114W::chr2_3	YBR114W	RAD16
YOR368W::chr15_4	YOR368W	RAD17
YCR066W::chr00_1	YCR066W	RAD18
YER173W::chr00_5	YER173W	RAD24
YKL113C::chr11_2	YKL113C	RAD27
YER171W::chr00_5	YER171W	RAD3
YDR419W::chr4_7	YDR419W	RAD30
YML011C::chr13_2	YML011C	RAD33
YDR314C::chr4_6	YDR314C	RAD34
YLR032W::chr00_8	YLR032W	RAD5
YER095W::chr00_8	YER095W	RAD51
YML032C::chr13_2	YML032C	RAD52
YGL163C::chr7_2	YGL163C	RAD54
YDR217C::chr4_5	YDR217C	RAD9
YGL246C::chr7_3	YGL246C	RAI1
YOR101W::chr15_2	YOR101W	RAS1
YNL098C::chr14_3	YNL098C	RAS2
YJR033C::chr00_13	YJR033C	RAV1
YLR084C::chr12_2	YLR084C	RAX2
YPL246C::chr16_1	YPL246C	RBD2
YAL036C::chr1_1	YAL036C	RBG1
YDL189W::chr4_2	YDL189W	RBS1
YML030W::chr13_2	YML030W	RCF1
YGL158W::chr7_2	YGL158W	RCK1
YLR248W::chr12_4	YLR248W	RCK2
YOL010W::chr15_5	YOL010W	RCL1
YMR075W::chr00_6	YMR075W	RCO1
YBR005W::chr2_2	YBR005W	RCR1
YBR073W::chr2_2	YBR073W	RDH54
YOR380W::chr15_4	YOR380W	RDR1
YCR106W::chr00_2	YCR106W	RDS1
YBR049C::chr2_2	YBR049C	REB1
YLR329W::chr12_5	YLR329W	REC102
YHR157W::chr8_3	YHR157W	REC104
YMR133W::chr00_9	YMR133W	REC114
YLR263W::chr12_4	YLR263W	RED1
YJL217W::chr10_1	YJL217W	REE1
YDR195W::chr4_5	YDR195W	REF2
YBR050C::chr2_2	YBR050C	REG2
YBR002C::chr2_2	YBR002C	RER2
YFR051C::chr00_2	YFR051C	RET2
YPL010W::chr16_3	YPL010W	RET3
YLR059C::chr12_2	YLR059C	REX2
YLR107W::chr12_2	YLR107W	REX3
YOL080C::chr15_5	YOL080C	REX4
YAR007C::chr1_1	YAR007C	RFA1
YNL312W::chr14_1	YNL312W	RFA2
YOL094C::chr00_6	YOL094C	RFC4
YBR087W::chr2_3/chr00_16a	YBR087W	RFC5
YBR052C::chr2_2	YBR052C	RFS1
YBL020W::chr2_1	YBL020W	RFT1
YLR073C::chr12_2	YLR073C	RFU1
YLR176C::chr12_3	YLR176C	RFX1
YDR379W::chr4_7	YDR379W	RGA2
YPR115W::chr16_5	YPR115W	RGC1
YER067W::chr5_3	YER067W	RGI1
YPL066W::chr16_3	YPL066W	RGL1
YOR107W::chr15_2	YOR107W	RGS2
YCR027C::chr00_1	YCR027C	RHB1
YPR165W::chr16_5	YPR165W	RHO1
YNL090W::chr00_16b	YNL090W	RHO2
YKR055W::chr11_3	YKR055W	RHO4
YBL033C::chr2_1	YBL033C	RIB1
YOL066C::chr15_5	YOL066C	RIB2
YBR153W::chr2_3	YBR153W	RIB7
YLR039C::chr00_8	YLR039C	RIC1
YBR275C::chr00_16a	YBR275C	RIF1
YLR453C::chr00_4	YLR453C	RIF2
YMR139W::chr00_11	YMR139W	RIM11
YBR192W::chr2_4	YBR192W	RIM2
YNL294C::chr14_1	YNL294C	RIM21
YHL024W::chr00_8	YHL024W	RIM4
YMR063W::chr00_6	YMR063W	RIM9
YHR197W::chr8_3	YHR197W	RIX1
YLL034C::chr12_1	YLL034C	RIX7
YPL208W::chr16_1	YPL208W	RKM1
YBR030W::chr2_2	YBR030W	RKM3
YDR257C::chr4_6	YDR257C	RKM4
YLR137W::chr12_3	YLR137W	RKM5
YMR247C::chr13_5	YMR247C	RKR1
YPR018W::chr16_4	YPR018W	RLF2
YLR009W::chr12_1	YLR009W	RLP24
YDL001W::chr4_1	YDL001W	RMD1
YDR255C::chr4_6	YDR255C	RMD5
YGL107C::chr7_2	YGL107C	RMD9
YPL024W::chr16_3	YPL024W	RMI1
YLR145W::chr12_3	YLR145W	RMP1
YGL250W::chr7_3	YGL250W	RMR1
YDR465C::chr4_8	YDR465C	RMT2
YMR061W::chr00_6	YMR061W	RNA14
YNL072W::chr00_16b	YNL072W	RNH201
YDR279W::chr4_6	YDR279W	RNH202
YLR154C::chr12_3	YLR154C	RNH203
YGR276C::chr00_17a	YGR276C	RNH70
YER070W::chr5_3	YER070W	RNR1
YMR239C::chr13_5	YMR239C	RNT1
YGL144C::chr7_2	YGL144C	ROG1
YGL171W::chr7_2	YGL171W	ROK1
YGR070W::chr7_4	YGR070W	ROM1
YLR371W::chr12_5	YLR371W	ROM2
YBL093C::chr2_1	YBL093C	ROX3
YJR063W::chr00_13	YJR063W	RPA12
YDR156W::chr4_5	YDR156W	RPA14
YJL148W::chr10_1	YJL148W	RPA34
YOL005C::chr15_5	YOL005C	RPB11
YIL021W::chr9_1	YIL021W	RPB3
YJL140W::chr00_14	YJL140W	RPB4
YBR154C::chr2_3	YBR154C	RPB5
YDR404C::chr4_7	YDR404C	RPB7
YHR143W-A::chr8_3	YHR143W-A	RPC10
YDR045C::chr4_3	YDR045C	RPC11
YJL011C::chr00_13	YJL011C	RPC17
YNL113W::chr14_3	YNL113W	RPC19
YNR003C::chr14_4	YNR003C	RPC34
YPR110C::chr16_5	YPR110C	RPC40
YPR190C::chr16_5	YPR190C	RPC82
YNL330C::chr14_1	YNL330C	RPD3
YJL121C::chr10_2	YJL121C	RPE1
YHR088W::chr8_2	YHR088W	RPF1
YKR081C::chr00_3	YKR081C	RPF2
YBR079C::chr2_2	YBR079C	RPG1
YLR075W::chr12_2	YLR075W	RPL10
YGR085C::chr7_4	YGR085C	RPL11B
YDR418W::chr4_7	YDR418W	RPL12B
YMR142C::chr00_8	YMR142C	RPL13B
YLR029C::chr12_1	YLR029C	RPL15A
YNL069C::chr00_18	YNL069C	RPL16B
YNL069C::chr14_3	YNL069C	RPL16B
YOL120C::chr00_6	YOL120C	RPL18A
YBR084C-A::chr00_16a	YBR084C-A	RPL19A
YBL027W::chr2_1	YBL027W	RPL19B
YMR242C::chr13_5	YMR242C	RPL20A
YOR312C::chr15_4	YOR312C	RPL20B
YBR191W::chr2_4	YBR191W	RPL21A
YPL079W::chr16_3	YPL079W	RPL21B
YLR061W::chr12_2	YLR061W	RPL22A
YBL087C::chr2_1	YBL087C	RPL23A
YOL127W::chr00_6	YOL127W	RPL25
YLR344W::chr12_5	YLR344W	RPL26A
YGR034W::chr7_4	YGR034W	RPL26B
YFR032C-A::chr00_2	YFR032C-A	RPL29
YIL018W::chr9_1	YIL018W	RPL2B
YGL030W::chr7_1	YGL030W	RPL30
YBL092W::chr2_1	YBL092W	RPL32
YPL143W::chr16_2	YPL143W	RPL33A
YOR234C::chr15_3	YOR234C	RPL33B
YMR194W::chr13_4	YMR194W	RPL36A
YLR185W::chr12_3	YLR185W	RPL37A
YDR500C::chr00_17a	YDR500C	RPL37B
YJL189W::chr00_14	YJL189W	RPL39
YDL133C-A::chr00_14	YDL133C-A	RPL41B
YNL162W::chr14_2	YNL162W	RPL42A
YBR031W::chr2_2	YBR031W	RPL4A
YPL131W::chr00_8	YPL131W	RPL5
YGL147C::chr7_2	YGL147C	RPL9A
YNL067W::chr00_16b	YNL067W	RPL9B
YML091C::chr00_9	YML091C	RPM2
YLR421C::chr12_5	YLR421C	RPN13
YGL004C::chr7_1	YGL004C	RPN14
YPR108W::chr16_5	YPR108W	RPN7
YDR427W::chr00_11	YDR427W	RPN9
YDR427W::chr4_7	YDR427W	RPN9
YPR187W::chr16_5	YPR187W	RPO26
YFL036W::chr6_1	YFL036W	RPO41
YDR382W::chr4_7	YDR382W	RPP2B
YBR048W::chr2_2	YBR048W	RPS11B
YJL191W::chr00_14	YJL191W	RPS14B
YOL040C::chr15_5	YOL040C	RPS15
YMR143W::chr13_4	YMR143W	RPS16A
YDL083C::chr4_1	YDL083C	RPS16B
YML024W::chr13_2	YML024W	RPS17A
YDR450W::chr4_8	YDR450W	RPS18A
YML026C::chr13_2	YML026C	RPS18B
YOL121C::chr00_6	YOL121C	RPS19A
YLR441C::chr00_4	YLR441C	RPS1A
YML063W::chr13_1b	YML063W	RPS1B
YJL136C::chr00_14	YJL136C	RPS21B
YJL190C::chr10_1	YJL190C	RPS22A
YGR027C::chr7_4	YGR027C	RPS25A
YLR333C::chr12_5	YLR333C	RPS25B
YER131W::chr00_5	YER131W	RPS26B
YKL156W::chr11_2	YKL156W	RPS27A
YLR264W::chr12_4	YLR264W	RPS28B
YLR287C-A::chr12_4	YLR287C-A	RPS30A
YOR182C::chr15_2	YOR182C	RPS30B
YLR167W::chr12_3	YLR167W	RPS31
YHR203C::chr8_3	YHR203C	RPS4B
YPL090C::chr16_3	YPL090C	RPS6A
YBR181C::chr2_4	YBR181C	RPS6B
YOR096W::chr00_8	YOR096W	RPS7A
YBL072C::chr2_1	YBL072C	RPS8A
YBR189W::chr00_14	YBR189W	RPS9B
YBR189W::chr2_4	YBR189W	RPS9B
YDR394W::chr4_7	YDR394W	RPT3
YOR117W::chr15_2	YOR117W	RPT5
YOR305W::chr15_4	YOR305W	RRG7
YPR116W::chr16_5	YPR116W	RRG8
YOL117W::chr00_6	YOL117W	RRI2
YBL025W::chr2_1	YBL025W	RRN10
YML043C::chr13_1b	YML043C	RRN11
YLR141W::chr12_3	YLR141W	RRN5
YBL014C::chr2_1	YBL014C	RRN6
YJL025W::chr00_13	YJL025W	RRN7
YPL012W::chr16_3	YPL012W	RRP12
YDR412W::chr4_7	YDR412W	RRP17
YHR069C::chr8_2	YHR069C	RRP4
YCR035C::chr00_1	YCR035C	RRP43
YDR280W::chr4_6	YDR280W	RRP45
YGR095C::chr7_4	YGR095C	RRP46
YOR001W::chr15_1	YOR001W	RRP6
YCL031C::chr3_1	YCL031C	RRP7
YOR294W::chr15_4	YOR294W	RRS1
YBL048W::chr2_1	YBL048W	RRT1
YCR045C::chr00_1	YCR045C	RRT12
YER066W::chr00_10	YER066W	RRT13
YNL105W::chr00_16b	YNL105W	RRT16
YPL193W::chr16_1	YPL193W	RSA1
YLR221C::chr12_3	YLR221C	RSA3
YDR303C::chr4_6	YDR303C	RSC3
YKR008W::chr11_3	YKR008W	RSC4
YLR033W::chr00_8	YLR033W	RSC58
YML127W::chr00_9	YML127W	RSC9
YML049C::chr13_1b	YML049C	RSE1
YMR030W::chr13_2	YMR030W	RSF1
YER050C::chr5_3	YER050C	RSM18
YNR037C::chr14_4	YNR037C	RSM19
YDR175C::chr4_5	YDR175C	RSM24
YGR215W::chr7_5	YGR215W	RSM27
YMR266W::chr13_5	YMR266W	RSN1
YGR152C::chr7_5	YGR152C	RSR1
YBR147W::chr2_3	YBR147W	RTC2
YOR118W::chr15_2	YOR118W	RTC5
YPL183W-A::chr00_11	YPL183W-A	RTC6
YPL183W-A::chr00_18	YPL183W-A	RTC6
YGL244W::chr7_3	YGL244W	RTF1
YOL067C::chr15_5	YOL067C	RTG1
YGL252C::chr7_3	YGL252C	RTG2
YBL103C::chr2_2	YBL103C	RTG3
YDL025C::chr4_1	YDL025C	RTK1
YDR233C::chr4_5	YDR233C	RTN1
YER139C::chr00_5	YER139C	RTR1
YDR066C::chr4_4	YDR066C	RTR2
YOR077W::chr15_1	YOR077W	RTS2
YPL183C::chr00_11	YPL183C	RTT10
YJL047C::chr10_2	YJL047C	RTT101
YGR275W::chr00_3	YGR275W	RTT102
YER104W::chr00_5	YER104W	RTT105
YHR154W::chr8_3	YHR154W	RTT107
YLL002W::chr12_1	YLL002W	RTT109
YDR190C::chr4_5	YDR190C	RVB1
YPL235W::chr16_1	YPL235W	RVB2
YDR388W::chr4_7	YDR388W	RVS167
YBR095C::chr2_3	YBR095C	RXT2
YKL212W::chr11_3	YKL212W	SAC1
YDR159W::chr4_5	YDR159W	SAC3
YDR129C::chr4_4	YDR129C	SAC6
YDR389W::chr4_7	YDR389W	SAC7
YGL175C::chr7_2	YGL175C	SAE2
YHR079C-B::chr00_3	YHR079C-A	SAE3
YBR280C::chr00_16a	YBR280C	SAF1
YJR004C::chr00_13	YJR004C	SAG1
YER043C::chr5_3	YER043C	SAH1
YER129W::chr00_5	YER129W	SAK1
YNL083W::chr00_16b	YNL083W	SAL1
YLR180W::chr12_3	YLR180W	SAM1
YPL274W::chr16_1	YPL274W	SAM3
YHR083W::chr8_2	YHR083W	SAM35
YNL026W::chr14_4	YNL026W	SAM50
YFR040W::chr00_2	YFR040W	SAP155
YJL098W::chr10_2	YJL098W	SAP185
YKR028W::chr00_14	YKR028W	SAP190
YGL229C::chr7_3	YGL229C	SAP4
YMR127C::chr00_9	YMR127C	SAS2
YBL052C::chr2_1	YBL052C	SAS3
YDR181C::chr4_5	YDR181C	SAS4
YAL027W::chr1_1	YAL027W	SAW1
YGR263C::chr00_3	YGR263C	SAY1
YDR351W::chr4_7	YDR351W	SBE2
YHR103W::chr8_2	YHR103W	SBE22
YDR180W::chr4_5	YDR180W	SCC2
YER147C::chr00_5	YER147C	SCC4
YGR049W::chr7_4	YGR049W	SCM4
YBR037C::chr2_2	YBR037C	SCO1
YBR024W::chr2_2	YBR024W	SCO2
YOR367W::chr15_4	YOR367W	SCP1
YJL080C::chr10_2	YJL080C	SCP160
YBL091C-A::chr00_1	YBL091C-A	SCS22
YMR272C::chr13_5	YMR272C	SCS7
YBL011W::chr2_1	YBL011W	SCT1
YGR245C::chr00_2	YGR245C	SDA1
YKL148C::chr11_2	YKL148C	SDH1
YLL041C::chr12_1	YLL041C	SDH2
YDR178W::chr4_5	YDR178W	SDH4
YKL193C::chr11_3	YKL193C	SDS22
YBR214W::chr2_4	YBR214W	SDS24
YGL224C::chr7_3	YGL224C	SDT1
YBL104C::chr2_2	YBL104C	SEA4
YDR164C::chr4_5	YDR164C	SEC1
YLR166C::chr12_3	YLR166C	SEC10
YIR022W::chr00_3	YIR022W	SEC11
YLR208W::chr12_3	YLR208W	SEC13
YGL233W::chr7_3	YGL233W	SEC15
[truncated: 1,264 more rows]

## Sheet: flight+NaCl
Strain	ORF	Gene
YMR072W::chr00_6	YMR072W	ABF2
YGR037C::chr7_4	YGR037C	ACB1
YFL039C::chr00_15	YFL039C	ACT1
YDR448W::chr4_8	YDR448W	ADA2
YKL206C::chr11_3	YKL206C	ADD66
YDR408C::chr4_7	YDR408C	ADE8
YOL086C::chr00_6	YOL086C	ADH1
YDR226W::chr4_5	YDR226W	ADK1
YNR044W::chr14_4	YNR044W	AGA1
YIL044C::chr9_1	YIL044C	AGE2
YDR214W::chr4_5	YDR214W	AHA1
YCR082W::chr00_1	YCR082W	AHC2
YLR109W::chr12_2	YLR109W	AHP1
YNR074C::chr00_6	YNR074C	AIF1
YGL160W::chr7_2	YGL160W	AIM14
YBR108W::chr2_3	YBR108W	AIM3
YNL100W::chr00_16b	YNL100W	AIM37
YMR169C::chr00_4	YMR169C	ALD3
YPL061W::chr16_3	YPL061W	ALD6
YBR110W::chr2_3	YBR110W	ALG1
YNL219C::chr14_2	YNL219C	ALG9
YML086C::chr13_1b	YML086C	ALO1
YKR021W::chr11_3	YKR021W	ALY1
YDR242W::chr4_6	YDR242W	AMD2
YBL019W::chr2_1	YBL019W	APN2
YBR149W::chr2_3	YBR149W	ARA1
YDL192W::chr4_3	YDL192W	ARF1
YMR062C::chr00_6	YMR062C	ARG7
YDR173C::chr4_5	YDR173C	ARG82
YDR376W::chr4_7	YDR376W	ARH1
YGL148W::chr7_2	YGL148W	ARO2
YMR033W::chr00_11	YMR033W	ARP9
YGR068C::chr7_4	YGR068C	ART5
YBL069W::chr2_1	YBL069W	AST1
YLR423C::chr00_4	YLR423C	ATG17
YLR189C::chr12_3	YLR189C	ATG26
YLR356W::chr12_5	YLR356W	ATG33
YNL223W::chr14_2	YNL223W	ATG4
YPR026W::chr00_15	YPR026W	ATH1
YDR377W::chr4_7	YDR377W	ATP17
YMR098C::chr00_9	YMR098C	ATP25
YDR298C::chr4_6	YDR298C	ATP5
YFL010W-A::chr00_17a	YFL010W-A	AUA1
YMR068W::chr00_6	YMR068W	AVO2
YHR040W::chr8_1	YHR040W	BCD1
YJL095W::chr10_2	YJL095W	BCK1
YDR375C::chr4_7	YDR375C	BCS1
YBR200W::chr2_4	YBR200W	BEM1
YKR068C::chr00_3	YKR068C	BET3
YJR053W::chr00_13	YJR053W	BFA1
YFL006W::chr6_1	YFL007W	BLM10
YER177W::chr00_5	YER177W	BMH1
YPL217C::chr00_18	YPL217C	BMS1
YLR231C::chr12_4	YLR231C	BNA5
YGR230W::chr00_2	YGR230W	BNS1
YNL042W::chr14_4	YNL042W	BOP3
YNR069C::chr00_15	YNR069C	BSC5
YFL025C::chr6_1	YFL025C	BST1
YDR252W::chr4_6	YDR252W	BTT1
YJL188C::chr10_1	YJL188C	BUD19
YMR014W::chr13_2	YMR014W	BUD22
YCR047C::chr00_16a	YCR047C	BUD23
YER014C-A::chr5_3	YER014C-A	BUD25
YFL023W::chr6_1	YFL023W	BUD27
YGR041W::chr7_4	YGR041W	BUD9
YLR226W::chr12_3	YLR226W	BUR2
YML102W::chr00_9	YML102W	CAC2
YNL278W::chr14_1	YNL278W	CAF120
YKR036C::chr00_14	YKR036C	CAF4
YLR438W::chr00_4	YLR438W	CAR2
YLR175W::chr12_3	YLR175W	CBF5
YNL161W::chr14_2	YNL161W	CBK1
YPL215W::chr16_1	YPL215W	CBP3
YDL069C::chr4_1	YDL069C	CBS1
YDR270W::chr4_6	YDR270W	CCC2
YJL014W::chr00_13	YJL014W	CCT3
YJR064W::chr00_13	YJR064W	CCT5
YDR188W::chr4_5	YDR188W	CCT6
YJL008C::chr00_13	YJL008C	CCT8
YLR307W::chr12_4	YLR307W	CDA1
YDR182W::chr4_5	YDR182W	CDC1
YHR166C::chr8_3	YHR166C	CDC23
YBR160W_AS::shawn	YBR160W	CDC28
YBR160W::chr2_3	YBR160W	CDC28
YDR168W::chr4_5	YDR168W	CDC37
YDR364C::chr4_7	YDR364C	CDC40
YMR001C::chr13_2	YMR001C	CDC5
YBR029C::chr2_2	YBR029C	CDS1
YDR301W::chr4_6	YDR301W	CFT1
YLR098C::chr12_2	YLR098C	CHA4
YBR274W::chr00_1	YBR274W	CHK1
YPL008W::chr16_3	YPL008W	CHL1
YGR157W::chr7_5	YGR157W	CHO2
YBR038W::chr2_2	YBR038W	CHS2
YLR330W::chr12_5	YLR330W	CHS5
YDR267C::chr4_6	YDR267C	CIA1
YMR138W::chr00_11	YMR138W	CIN4
YBR135W::chr2_3	YBR135W	CKS1
YGR110W::chr00_14	YGR110W	CLD1
YOR250C::chr15_3	YOR250C	CLP1
YKL137W::chr11_2	YKL137W	CMC1
YBR109C::chr2_3	YBR109C	CMD1
YDR357C::chr4_7	YDR357C	CNL1
YBR155W::chr2_3	YBR155W	CNS1
YLL050C::chr12_1	YLL050C	COF1
YNL051W::chr00_16b	YNL051W	COG5
YDL145C::chr4_2	YDL145C	COP1
YML110C::chr00_9	YML110C	COQ5
YBL045C::chr2_1	YBL045C	COR1
YGL263W::chr7_3	YGL263W	COS12
YJL003W::chr00_13	YJL003W	COX16
YGR062C::chr7_4	YGR062C	COX18
YDR231C::chr4_5	YDR231C	COX20
YMR256C::chr13_5	YMR256C	COX7
YLR429W::chr00_4	YLR429W	CRN1
YOR031W::chr15_1	YOR031W	CRS5
YMR048W::chr00_11	YMR048W	CSM3
YDR179C::chr4_5	YDR179C	CSN9
YMR078C::chr00_6	YMR078C	CTF18
YHR191C::chr00_8	YHR191C	CTF8
YKL139W::chr00_14	YKL139W	CTK1
YML112W::chr00_9	YML112W	CTK3
YPL064C::chr16_3	YPL064C	CWC27
YKL096W-A::chr00_14	YKL096W-A	CWP2
YJR048W::chr00_13	YJR048W	CYC1
YAL012W::chr00_12	YAL012W	CYS3
YKL087C::chr11_1	YKL087C	CYT2
YBR233W-A::chr00_20	YBR233W-A	DAD3
YDR320C-A::chr00_20	YDR320C-A	DAD4
YIR027C::chr00_3	YIR027C	DAL1
YIR023W::chr00_17b	YIR023W	DAL81
YML113W::chr00_9	YML113W	DAT1
YNL112W::chr14_3	YNL112W	DBP2
YOL149W::chr00_10	YOL149W	DCP1
YLR270W::chr12_4	YLR270W	DCS1
YER143W::chr00_5	YER143W	DDI1
YHR019C::chr8_1	YHR019C	DED81
YBR201W::chr2_4	YBR201W	DER1
YJL065C::chr10_2	YJL065C	DLS1
YPR175W::chr16_5	YPR175W	DPB2
YKL191W::chr11_3	YKL191W	DPH2
YDR284C::chr4_6	YDR284C	DPP1
YKR071C::chr00_3	YKR071C	DRE2
YGL196W::chr7_3	YGL196W	DSD1
YKL172W::chr11_2	YKL172W	EBP2
YDR206W::chr4_5	YDR206W	EBS1
YHR021W-A::chr00_3	YHR021W-A	ECM12
YBL043W::chr2_1	YBL043W	ECM13
YLR443W::chr00_4	YLR443W	ECM7
YBL047C::chr2_1	YBL047C	EDE1
YGR272C::chr00_17a	YGR271C-A	EFG1
YOR133W::chr15_2	YOR133W	EFT1
YDR385W::chr4_7	YDR385W	EFT2
YPL037C::chr16_3	YPL037C	EGD1
YHR193C::chr00_8	YHR193C	EGD2
YPL046C::chr16_3	YPL046C	ELC1
YDR516C::chr4_8	YDR516C	EMI2
YGL200C::chr7_3	YGL200C	EMP24
YFL048C::chr6_1	YFL048C	EMP47
YLR206W::chr12_3	YLR206W	ENT2
YLR065C::chr12_2	YLR065C	ENV10
YPL236C::chr16_1	YPL236C	ENV7
YBL040C::chr2_1	YBL040C	ERD2
YGL012W::chr7_1	YGL012W	ERG4
YHR072W::chr8_2	YHR072W	ERG7
YGR029W::chr7_4	YGR029W	ERV1
YML012W::chr13_2	YML012W	ERV25
YDR363W::chr4_7	YDR363W	ESC2
YJR017C::chr00_13	YJR017C	ESS1
YBR026C::chr2_2	YBR026C	ETR1
YDR518W::chr4_8	YDR518W	EUG1
YBR102C::chr2_3	YBR102C	EXO84
YMR246W::chr13_5	YMR246W	FAA4
YDR339C::chr4_7	YDR339C	FCF1
YKR016W::chr11_3	YKR016W	FCJ1
YER060W-A::chr5_3	YER060W-A	FCY22
YBR101C::chr2_3	YBR101C	FES1
YIL131C::chr9_2	YIL131C	FKH1
YDR236C::chr4_5	YDR236C	FMN1
YHR176W::chr8_3	YHR176W	FMO1
YMR113W::chr00_9	YMR113W	FOL3
YNL135C::chr14_3	YNL135C	FPR1
YNR060W::chr00_4	YNR060W	FRE4
YBL042C::chr2_1	YBL042C	FUI1
YBR021W::chr2_2	YBR021W	FUR4
YHR059W::chr00_10	YHR059W	FYV4
YNL133C::chr14_3	YNL133C	FYV6
YOR178C::chr15_2	YOR178C	GAC1
YBR020W::chr2_2	YBR020W	GAL1
YBR019C::chr2_2	YBR019C	GAL10
YLR081W::chr12_2	YLR081W	GAL2
YER025W::chr5_3	YER025W	GCD11
YJL125C::chr00_15	YJL125C	GCD14
YDR283C::chr4_6	YDR283C	GCN2
YAL044C::chr1_1	YAL044C	GCV3
YPL110C::chr16_2	YPL110C	GDE1
YBR187W::chr2_4	YBR187W	GDT1
YLR091W::chr12_2	YLR091W	GEP5
YDR358W::chr4_7	YDR358W	GGA1
YHR108W::chr8_2	YHR108W	GGA2
YDL198C::chr4_3	YDL198C	GGC1
YDR309C::chr4_6	YDR309C	GIC2
YDR507C::chr4_8	YDR507C	GIN4
YML006C::chr13_2	YML006C	GIS4
YEL011W::chr00_8	YEL011W	GLC3
YDL207W::chr4_3	YDL207W	GLE1
YDR506C::chr4_8	YDR506C	GMC1
YFL017C::chr6_1	YFL017C	GNA1
YHR183W::chr8_3	YHR183W	GND1
YOR320C::chr15_4	YOR320C	GNT1
YJR013W::chr00_13	YJR013W	GPI14
YHR188C::chr00_21	YHR188C	GPI16
YBR004C::chr2_2	YBR004C	GPI18
YPL076W::chr16_3	YPL076W	GPI2
YOL056W::chr15_5	YOL056W	GPM3
YBR014C::chr2_2	YBR014C	GRX7
YLR364W::chr12_5	YLR364W	GRX8
YLR293C::chr12_4	YLR293C	GSP1
YLR258W::chr12_4	YLR258W	GSY2
YPL189W::chr16_1	YPL189W	GUP2
YGL245W::chr7_3	YGL245W	GUS1
YPR005C::chr16_3	YPR005C	HAL1
YBL021C::chr2_1	YBL021C	HAP3
YMR290C::chr13_5	YMR290C	HAS1
YDL223C::chr4_3	YDL223C	HBT1
YNL021W::chr14_4	YNL021W	HDA1
YPR179C::chr16_5	YPR179C	HDA3
YBL032W::chr2_1	YBL032W	HEK2
YMR293C::chr13_5	YMR293C	HER2
YFR025C::chr00_15	YFR025C	HIS2
YDL227C::ctrl_4	YDL227C	HO
YDL227C::ctrl_18	YDL227C	HO
YDL227C::ctrl_5	YDL227C	HO
YDL227C::ctrl_6	YDL227C	HO
YDL227C::ctrl_7	YDL227C	HO
YDL227C::ctrl_8	YDL227C	HO
YDL227C::ctrl_48	YDL227C	HO
YDL227C::ctrl_33	YDL227C	HO
YDL227C::ctrl_42	YDL227C	HO
YDL227C::ctrl_19	YDL227C	HO
YDL227C::ctrl_13	YDL227C	HO
YDL227C::ctrl_9	YDL227C	HO
YDL227C::ctrl_10	YDL227C	HO
YDL227C::ctrl_11	YDL227C	HO
YDL227C::ctrl_20	YDL227C	HO
YDL227C::ctrl_21	YDL227C	HO
YDL227C::ctrl_22	YDL227C	HO
YDL227C::ctrl_14	YDL227C	HO
YDL227C::ctrl_23	YDL227C	HO
YDL227C::ctrl_24	YDL227C	HO
YDL227C::ctrl_25	YDL227C	HO
YDL227C::ctrl_26	YDL227C	HO
YDL227C::ctrl_27	YDL227C	HO
YDL227C::ctrl_34	YDL227C	HO
YDL227C::ctrl_28	YDL227C	HO
YDL227C::ctrl_29	YDL227C	HO
YDL227C::ctrl_30	YDL227C	HO
YDL227C::ctrl_31	YDL227C	HO
YDL227C::ctrl_15	YDL227C	HO
YDL227C::ctrl_32	YDL227C	HO
YDL227C::ctrl_43	YDL227C	HO
YDL227C::ctrl_47	YDL227C	HO
YDL227C::ctrl_37	YDL227C	HO
YDL227C::ctrl_38	YDL227C	HO
YDL227C::ctrl_16	YDL227C	HO
YDL227C::ctrl_35	YDL227C	HO
YDL227C::ctrl_45	YDL227C	HO
YDL227C::ctrl_54	YDL227C	HO
YDL227C::ctrl_36	YDL227C	HO
YDL227C::ctrl_39	YDL227C	HO
YDL227C::ctrl_1	YDL227C	HO
YDL227C::ctrl_49	YDL227C	HO
YDL227C::ctrl_50	YDL227C	HO
YDL227C::ctrl_40	YDL227C	HO
YDL227C::ctrl_41	YDL227C	HO
YDL227C::ctrl_44	YDL227C	HO
YDL227C::ctrl_17	YDL227C	HO
YDL227C::ctrl_52	YDL227C	HO
YDL227C::ctrl_46	YDL227C	HO
YDL227C::ctrl_53	YDL227C	HO
YDL227C::ctrl_51	YDL227C	HO
YDL227C::ctrl_2	YDL227C	HO
YDL227C::ctrl_3	YDL227C	HO
YMR032W::chr13_2	YMR032W	HOF1
YKL138C-A::chr00_20	YKL138C-A	HSK3
YKL101W::chr11_2	YKL101W	HSL1
YBR133C::chr2_3	YBR133C	HSL7
YDR258C::chr4_6	YDR258C	HSP78
YPL015C::chr16_3	YPL015C	HST2
YDR225W::chr4_5	YDR225W	HTA1
YDR224C::chr00_21	YDR224C	HTB1
YBL002W::chr2_1	YBL002W	HTB2
YGR268C::chr00_3	YGR268C	HUA1
YJR036C::chr00_13	YJR036C	HUL4
YPL244C::chr16_1	YPL244C	HUT1
YER039C::chr5_3	YER039C	HVG1
YNR072W::chr00_6	YNR072W	HXT17
YIR037W::chr00_3	YIR037W	HYR1
YPL250C::chr16_1	YPL250C	ICY2
YBR159W::chr2_3	YBR159W	IFA38
YCL009C::chr3_1	YCL009C	ILV6
YCR046C::chr00_16a	YCR046C	IMG1
YNL106C::chr00_16b	YNL106C	INP52
YFR013W::chr6_1	YFR013W	IOC3
YMR044W::chr13_2	YMR044W	IOC4
YHR085W::chr8_2	YHR085W	IPI1
YDR315C::chr4_6	YDR315C	IPK1
YPL209C::chr16_1	YPL209C	IPL1
YIR036C::chr00_3	YIR036C	IRC24
YDR332W::chr4_6	YDR332W	IRC3
YFR038W::chr00_2	YFR038W	IRC5
YFR043C::chr00_2	YFR043C	IRC6
YKR019C::chr00_14	YKR019C	IRS4
YOL002C::chr15_5	YOL002C	IZH2
YOL101C::chr00_6	YOL101C	IZH4
YJL034W::chr10_2	YJL034W	KAR2
YMR065W::chr00_6	YMR065W	KAR5
YGL203C::chr7_3	YGL203C	KEX1
YLR096W::chr12_2	YLR096W	KIN2
YAR018C::chr1_1	YAR018C	KIN3
YKL168C::chr11_2	YKL168C	KKQ8
YNL132W::chr14_3	YNL132W	KRE33
YNL024C-A::chr00_21	YNL024C-A	KSH1
YHR082C::chr8_2	YHR082C	KSP1
YPL053C::chr16_3	YPL053C	KTR6
YJL062W::chr10_2	YJL062W	LAS21
YLR104W::chr12_2	YLR104W	LCL2
YBL006C::chr2_1	YBL006C	LDB7
YOR123C::chr15_2	YOR123C	LEO1
YKL073W::chr11_1	YKL073W	LHS1
YHR156C::chr8_3	YHR156C	LIN1
YGR244C::chr00_2	YGR244C	LSC2
YGL099W::chr7_2	YGL099W	LSG1
YKL176C::chr11_2	YKL176C	LST4
YNR050C::chr00_4	YNR050C	LYS9
YBR299W::chr00_17a	YBR299W	MAL32
YOL060C::chr15_5	YOL060C	MAM3
YBL023C::chr2_1	YBL023C	MCM2
YDR318W::chr4_6	YDR318W	MCM21
YPR019W::chr16_4	YPR019W	MCM4
YLR368W::chr12_5	YLR368W	MDM30
YJL102W::chr10_2	YJL102W	MEF2
YPR138C::chr16_5	YPR138C	MEP3
YNL277W::chr14_1	YNL277W	MET2
YOL064C::chr15_5	YOL064C	MET22
YJR010W::chr00_13	YJR010W	MET3
YPL038W::chr16_3	YPL038W	MET31
YER091C::chr00_8	YER091C	MET6
YMR115W::chr00_9	YMR115W	MGR3
YLR332W::chr12_5	YLR332W	MID2
YLR099W-A::chr00_21	YLR099W-A	MIM2
YEL007W::chr5_2	YEL007W	MIT1
YPL140C::chr16_2	YPL140C	MKK2
YNL117W::chr14_3	YNL117W	MLS1
YLR190W::chr12_3	YLR190W	MMR1
YIR025W::chr00_3	YIR025W	MND2
YHR204W::chr8_3	YHR204W	MNL1
YLR057W::chr12_2	YLR057W	MNL2
YDR245W::chr4_6	YDR245W	MNN10
YKL200C::chr11_3	YKL201C	MNN4
YIL014W::chr9_1	YIL014W	MNT3
YNR059W::chr00_4	YNR059W	MNT4
YPL082C::chr16_3	YPL082C	MOT1
YHR162W::chr00_8	YHR162W	MPC2
YIR002C::chr9_2	YIR002C	MPH1
YJR002W::chr00_13	YJR002W	MPP10
YNL284C::chr00_18	YNL284C	MRPL10
YKR085C::chr00_15	YKR085C	MRPL20
YMR024W::chr13_2	YMR024W	MRPL3
YMR286W::chr13_5	YMR286W	MRPL33
YDR322W::chr4_6	YDR322W	MRPL35
YHR147C::chr8_3	YHR147C	MRPL6
YDR337W::chr4_6	YDR337W	MRPS28
YDR335W::chr4_6	YDR335W	MSN5
YGL226W::chr7_3	YGL226W	MTC3
YHR168W::chr00_8	YHR168W	MTG2
YDR277C::chr4_6	YDR277C	MTH1
YGR257C::chr00_17a	YGR257C	MTM1
YPL126W::chr16_2	YPL126W	NAN1
YDR397C::chr4_7	YDR397C	NCB2
YPR149W::chr16_5	YPR149W	NCE102
YLR254C::chr12_4	YLR254C	NDL1
YDR383C::chr4_7	YDR383C	NKP1
YNL123W::chr14_3	YNL123W	NMA111
YHR170W::chr00_8	YHR170W	NMD3
YLR363C::chr12_5	YLR363C	NMD4
YNR053C::chr00_4	YNR053C	NOG2
YHR072W-A::chr00_20	YHR072W-A	NOP10
YNL110C::chr14_3	YNL110C	NOP15
YER002W::chr5_2	YER002W	NOP16
YNL061W::chr00_16b	YNL061W	NOP2
YDL213C::chr4_3	YDL213C	NOP6
YMR091C::chr00_6	YMR091C	NPL6
YMR047C::chr13_2	YMR047C	NUP116
YIL115C::chr9_2	YIL115C	NUP159
YAR002W::chr1_1	YAR002W	NUP60
YDL193W::chr4_3	YDL193W	NUS1
YPR168W::chr16_5	YPR168W	NUT2
YLR093C::chr12_2	YLR093C	NYV1
YPL052W::chr16_3	YPL052W	OAZ1
YDR316W::chr4_6	YDR316W	OMS1
YKR035C::chr11_3	YKR035C	OPI8
YPR194C::chr16_5	YPR194C	OPT2
YBR060C::chr2_2	YBR060C	ORC2
YJR051W::chr00_13	YJR051W	OSM1
YJL002C::chr00_13	YJL002C	OST1
YLR054C::chr12_2	YLR054C	OSW2
YBR279W::chr00_1	YBR279W	PAF1
YDR348C::chr4_7	YDR348C	PAL1
YLR037C::chr00_8	YLR037C	PAU23
YBR295W::chr00_1	YBR295W	PCA1
YDR228C::chr4_5	YDR228C	PCF11
YKR097W::chr00_4	YKR097W	PCK1
YLR134W::chr12_3	YLR134W	PDC5
YPR002W::chr16_3	YPR002W	PDH1
YBL005W::chr2_1	YBL005W	PDR3
YBR035C::chr2_2	YBR035C	PDX3
YBL017C::chr2_1	YBL017C	PEP1
YLR064W::chr12_2	YLR064W	PER33
YKR046C::chr00_14	YKR046C	PET10
YMR257C::chr13_5	YMR257C	PET111
YBL080C::chr2_1	YBL080C	PET112
YLR067C::chr12_2	YLR067C	PET309
YNL003C::chr14_4	YNL003C	PET8
YBL030C::chr2_1	YBL030C	PET9
YDR265W::chr4_6	YDR265W	PEX10
YMR026C::chr13_2	YMR026C	PEX12
YOL044W::chr15_5	YOL044W	PEX15
YHR160C::chr8_3	YHR160C	PEX18
YHR150W::chr8_3	YHR150W	PEX28
YDR329C::chr4_6	YDR329C	PEX3
YOL136C::chr00_6	YOL136C	PFK27
YHR185C::chr00_10	YHR185C	PFS1
YMR105C::chr00_9	YMR105C	PGM2
YGR231C::chr00_2	YGR231C	PHB2
YGR233C::chr00_2	YGR233C	PHO81
YPL031C::chr16_3	YPL031C	PHO85
YCR037C::chr00_1	YCR037C	PHO87
YER053C::chr5_3	YER053C	PIC2
YBL022C::chr2_1	YBL022C	PIM1
YPR154W::chr16_5	YPR154W	PIN3
YKL163W::chr11_2	YKL163W	PIR3
YPR113W::chr16_5	YPR113W	PIS1
YDR501W::chr4_8	YDR501W	PLM2
YDR183W::chr4_5	YDR183W	PLP1
YDR276C::chr4_6	YDR276C	PMP3
YOR321W::chr15_4	YOR321W	PMT3
YPL096W::chr16_2	YPL096W	PNG1
YJR006W::chr00_13	YJR006W	POL31
YNL282W::chr14_1	YNL282W	POP3
YPL188W::chr16_1	YPL188W	POS5
YDL188C::chr4_2	YDL188C	PPH22
YMR297W::chr13_5	YMR297W	PRC1
YER012W::chr5_2	YER012W	PRE1
YBL041W::chr2_1	YBL041W	PRE7
YML092C::chr00_9	YML092C	PRE8
YML047C::chr00_11	YML047C	PRM6
YDR243C::chr4_6	YDR243C	PRP28
YHL011C::chr00_10	YHL011C	PRS3
YBL046W::chr2_1	YBL046W	PSY4
YAL043C::chr1_1	YAL043C	PTA1
YHR189W::chr8_3	YHR189W	PTH1
YNL016W::chr14_4	YNL016W	PUB1
YER094C::chr00_8	YER094C	PUP3
YLR196W::chr12_3	YLR196W	PWP1
YPR186C::chr16_5	YPR186C	PZF1
YBR114W::chr2_3	YBR114W	RAD16
YJR035W::chr00_13	YJR035W	RAD26
YER162C::chr00_5	YER162C	RAD4
YDR217C::chr4_5	YDR217C	RAD9
YBR049C::chr2_2	YBR049C	REB1
YLR329W::chr12_5	YLR329W	REC102
YPL010W::chr16_3	YPL010W	RET3
YBR052C::chr2_2	YBR052C	RFS1
YDR379W::chr4_7	YDR379W	RGA2
YOR107W::chr15_2	YOR107W	RGS2
YBL033C::chr2_1	YBL033C	RIB1
YBR192W::chr2_4	YBR192W	RIM2
YHR197W::chr8_3	YHR197W	RIX1
YPL208W::chr16_1	YPL208W	RKM1
YDR257C::chr4_6	YDR257C	RKM4
YPR018W::chr16_4	YPR018W	RLF2
YPL089C::chr16_3	YPL089C	RLM1
YDR255C::chr4_6	YDR255C	RMD5
YPL024W::chr16_3	YPL024W	RMI1
YGL250W::chr7_3	YGL250W	RMR1
YDR279W::chr4_6	YDR279W	RNH202
YGL144C::chr7_2	YGL144C	ROG1
YGR070W::chr7_4	YGR070W	ROM1
YPR065W::chr16_4	YPR065W	ROX1
YJL140W::chr00_14	YJL140W	RPB4
YJL011C::chr00_13	YJL011C	RPC17
YNL330C::chr14_1	YNL330C	RPD3
YKR081C::chr00_3	YKR081C	RPF2
YGR085C::chr7_4	YGR085C	RPL11B
YDR418W::chr4_7	YDR418W	RPL12B
YMR142C::chr00_8	YMR142C	RPL13B
YNL069C::chr14_3	YNL069C	RPL16B
YOL120C::chr00_6	YOL120C	RPL18A
YBL027W::chr2_1	YBL027W	RPL19B
YBR191W::chr2_4	YBR191W	RPL21A
YLR061W::chr12_2	YLR061W	RPL22A
YFL035C-B::chr6_1	YFL034C-A	RPL22B
YLR344W::chr12_5	YLR344W	RPL26A
YGL030W::chr7_1	YGL030W	RPL30
YPL143W::chr16_2	YPL143W	RPL33A
YOR234C::chr15_3	YOR234C	RPL33B
YJL189W::chr00_14	YJL189W	RPL39
YNL162W::chr14_2	YNL162W	RPL42A
YNL067W::chr00_16b	YNL067W	RPL9B
YML091C::chr00_9	YML091C	RPM2
YPR108W::chr16_5	YPR108W	RPN7
YFL036W::chr6_1	YFL036W	RPO41
YDR382W::chr4_7	YDR382W	RPP2B
YLR048W::chr12_2	YLR048W	RPS0B
YDR450W::chr4_8	YDR450W	RPS18A
YLR441C::chr00_4	YLR441C	RPS1A
YLR333C::chr12_5	YLR333C	RPS25B
YBR189W::chr2_4	YBR189W	RPS9B
YIL153W::chr9_2	YIL153W	RRD1
YPR116W::chr16_5	YPR116W	RRG8
YBL025W::chr2_1	YBL025W	RRN10
YBL014C::chr2_1	YBL014C	RRN6
YPL012W::chr16_3	YPL012W	RRP12
YHR069C::chr8_2	YHR069C	RRP4
YCR035C::chr00_1	YCR035C	RRP43
YDR280W::chr4_6	YDR280W	RRP45
YCL031C::chr3_1	YCL031C	RRP7
YOR294W::chr15_4	YOR294W	RRS1
YDR303C::chr4_6	YDR303C	RSC3
YCR052W::chr00_1	YCR052W	RSC6
YMR030W::chr13_2	YMR030W	RSF1
YDR175C::chr4_5	YDR175C	RSM24
YGR152C::chr7_5	YGR152C	RSR1
YOR118W::chr15_2	YOR118W	RTC5
YGL244W::chr7_3	YGL244W	RTF1
YGL252C::chr7_3	YGL252C	RTG2
YDR233C::chr4_5	YDR233C	RTN1
YER139C::chr00_5	YER139C	RTR1
YGR275W::chr00_3	YGR275W	RTT102
YDR289C::chr4_6	YDR289C	RTT103
YER104W::chr00_5	YER104W	RTT105
YHR154W::chr8_3	YHR154W	RTT107
YBR095C::chr2_3	YBR095C	RXT2
YNL083W::chr00_16b	YNL083W	SAL1
YGL229C::chr7_3	YGL229C	SAP4
YER147C::chr00_5	YER147C	SCC4
YMR272C::chr13_5	YMR272C	SCS7
YBL011W::chr2_1	YBL011W	SCT1
YPL085W::chr16_3	YPL085W	SEC16
YIL109C::chr9_2	YIL109C	SEC24
YER008C::chr5_2	YER008C	SEC3
YLR440C::chr00_4	YLR440C	SEC39
YDR170C::chr4_5	YDR170C	SEC7
YMR086W::chr00_6	YMR086W	SEG1
YLR321C::chr12_4	YLR321C	SFH1
YPR161C::chr16_5	YPR161C	SGV1
YGL228W::chr7_3	YGL228W	SHE10
YOR035C::chr15_1	YOR035C	SHE4
YBL058W::chr2_1	YBL058W	SHP1
YHL006C::chr8_1	YHL006C	SHU1
YGR112W::chr7_4	YGR112W	SHY1
YDR422C::chr4_7	YDR422C	SIP1
YJL089W::chr10_2	YJL089W	SIP4
YNL032W::chr14_4	YNL032W	SIW14
YLR187W::chr12_3	YLR187W	SKG3
YDR328C::chr4_6	YDR328C	SKP1
YBR156C::chr2_3	YBR156C	SLI15
YNL047C::chr00_18	YNL047C	SLM2
YCR024C::chr00_1	YCR024C	SLM5
YPL027W::chr00_17b	YPL027W	SMA1
YLR275W::chr12_4	YLR275W	SMD2
YLR147C::chr12_3	YLR147C	SMD3
YFL018W-A::chr6_1	YFL017W-A	SMX2
YOR327C::chr15_4	YOR327C	SNC2
YIL016W::chr9_1	YIL016W	SNL1
YFL060C::chr00_18	YFL060C	SNO3
YPR101W::chr16_4	YPR101W	SNT309
YDR240C::chr4_5	YDR240C	SNU56
YCR073W-A::chr00_1	YCR073W-A	SOL2
YHR163W::chr8_3	YHR163W	SOL3
YMR066W::chr00_6	YMR066W	SOV1
YLL021W::chr12_1	YLL021W	SPA2
YJR010C-A::chr00_13	YJR010C-A	SPC1
YLR066W::chr12_2	YLR066W	SPC3
YAL047C::chr00_12	YAL047C	SPC72
YKR031C::chr11_3	YKR031C	SPO14
YHR153C::chr8_3	YHR153C	SPO16
YER148W::chr00_5	YER148W	SPT15
YKL020C::chr11_1	YKL020C	SPT23
YDR392W::chr4_7	YDR392W	SPT3
YNL224C::chr14_2	YNL224C	SQS1
YDR308C::chr4_6	YDR308C	SRB7
YKR091W::chr00_4	YKR091W	SRL3
YCL037C::chr3_1	YCL037C	SRO9
YDR292C::chr4_6	YDR292C	SRP101
YPL243W::chr16_1	YPL243W	SRP68
YMR101C::chr00_9	YMR101C	SRT1
YAL005C::chr1_1	YAL005C	SSA1
YBL075C::chr2_1	YBL075C	SSA3
YDR312W::chr4_6	YDR312W	SSF2
YBR283C::chr00_1	YBR283C	SSH1
YIL143C::chr9_2	YIL143C	SSL2
YHR064C::chr00_8	YHR064C	SSZ1
YHR178W::chr8_3	YHR178W	STB5
YDR410C::chr4_7	YDR410C	STE14
YFL026W::chr00_16b	YFL026W	STE2
YKL209C::chr11_3	YKL209C	STE6
YDR082W::chr4_4	YDR082W	STN1
YLR385C::chr12_5	YLR385C	SWC7
YAR044W::chr1_1	YAR042W	SWH1
YDR260C::chr4_6	YDR260C	SWM1
YLR251W::chr12_4	YLR251W	SYM1
YGL243W::chr7_3	YGL243W	TAD1
YGR274C::chr00_3	YGR274C	TAF1
YDR167W::chr4_5	YDR167W	TAF10
YMR005W::chr00_14	YMR005W	TAF4
YBR198C::chr2_4	YBR198C	TAF5
YJR046W::chr00_13	YJR046W	TAH11
YGL232W::chr7_3	YGL232W	TAN1
YOR086C::chr15_1	YOR086C	TCB1
YBR044C::chr2_2	YBR044C	TCM62
YDR212W::chr4_5	YDR212W	TCP1
YPR157W::chr16_5	YPR157W	TDA6
YIL039W::chr9_1	YIL039W	TED1
YBR118W::chr2_3	YBR118W	TEF2
YDR311W::chr4_6	YDR311W	TFB1
YGR005C::chr7_3	YGR005C	TFG2
YDR058C::chr00_14	YDR058C	TGL2
YNL332W::chr14_1	YNL332W	THI12
YNL139C::chr14_3	YNL139C	THO2
YHR167W::chr8_3	YHR167W	THP2
YKR059W::chr11_3	YKR059W	TIF1
YPR041W::chr16_4	YPR041W	TIF5
YPL063W::chr16_3	YPL063W	TIM50
YGL145W::chr7_2	YGL145W	TIP20
YER175C::chr00_5	YER175C	TMT1
YNL273W::chr14_1	YNL273W	TOF1
YJL093C::chr10_2	YJL093C	TOK1
YNL088W::chr14_3	YNL088W	TOP2
YLR234W::chr12_4	YLR234W	TOP3
YBR162C::chr2_3	YBR162C	TOS1
YNL300W::chr00_8	YNL300W	TOS6
YGR096W::chr7_4	YGR096W	TPC1
YJL164C::chr10_1	YJL164C	TPK1
YKL166C::chr11_2	YKL166C	TPK3
YBR126C::chr2_3	YBR126C	TPS1
YMR261C::chr13_5	YMR261C	TPS3
YDR165W::chr4_5	YDR165W	TRM82
YDR353W::chr4_7	YDR353W	TRR1
YGR166W::chr7_5	YGR166W	TRS65
YER093C::chr00_8	YER093C	TSC11
YDR100W::chr4_4	YDR100W	TVP15
YMR304W::chr13_5	YMR304W	UBP15
YFR010W::chr6_1	YFR010W	UBP6
YDR330W::chr4_6	YDR330W	UBX5
YBR006W::chr2_2	YBR006W	UGA2
YKR044W::chr11_3	YKR044W	UIP5
YKL216W::chr11_3	YKL216W	URA1
YLR222C::chr12_3	YLR222C	UTP13
YDR398W::chr4_7	YDR398W	UTP5
YHR196W::chr8_3	YHR196W	UTP9
YGL212W::chr7_3	YGL212W	VAM7
YGL258W::chr7_3	YGL258W	VEL1
YBR105C::chr2_3	YBR105C	VID24
YNL212W::chr14_2	YNL212W	VID27
YPR036W::chr16_4	YPR036W	VMA13
YBR127C::chr2_3	YBR127C	VMA2
YBR097W::chr2_3	YBR097W	VPS15
YPL065W::chr16_3	YPL065W	VPS28
YJL029C::chr00_13	YJL029C	VPS53
YJR044C::chr00_13	YJR044C	VPS55
YDR200C::chr4_5	YDR200C	VPS64
YGL104C::chr7_2	YGL104C	VPS73
YDR372C::chr4_7	YDR372C	VPS74
YAL002W::chr1_1	YAL002W	VPS8
YGL225W::chr7_3	YGL225W	VRG4
YER072W::chr5_3	YER072W	VTC1
YPL019C::chr16_3	YPL019C	VTC3
YOR359W::chr15_4	YOR359W	VTS1
YDR369C::chr4_7	YDR369C	XRS2
YAL043C-A::chr1_1	YAL042C-A	YAL042C-A
YHR161C::chr8_3	YHR161C	YAP1801
YBL010C::chr2_1	YBL010C	YBL010C
YBL044W::chr2_1	YBL044W	YBL044W
YBL065W::chr2_1	YBL065W	YBL065W
YBL073W::chr2_1	YBL073W	YBL073W
YBL081W::chr2_1	YBL081W	YBL081W
YBL095W::chr2_2	YBL095W	YBL095W
YBR016W::chr2_2	YBR016W	YBR016W
YBR027C::chr2_2	YBR027C	YBR027C
YBR113W::chr2_3	YBR113W	YBR113W
YBR116C::chr2_3	YBR116C	YBR116C
YBR190W::chr2_4	YBR190W	YBR190W
YBR300C::chr00_1	YBR300C	YBR300C
YDR325W::chr4_6	YDR325W	YCG1
YCR025C::chr00_1	YCR025C	YCR025C
YCR061W::chr00_1	YCR061W	YCR061W
YLL055W::chr12_1	YLL055W	YCT1
YDR179W-A::chr4_5	YDR179W-A	YDR179W-A
YDR193W::chr4_5	YDR193W	YDR193W
YDR199W::chr4_5	YDR199W	YDR199W
YDR215C::chr4_5	YDR215C	YDR215C
YDR262W::chr4_6	YDR262W	YDR262W
YDR266C::chr4_6	YDR266C	YDR266C
YDR269C::chr4_6	YDR269C	YDR269C
YDR271C::chr4_6	YDR271C	YDR271C
YDR274C::chr4_6	YDR274C	YDR274C
YDR282C::chr4_6	YDR282C	YDR282C
YDR319C::chr4_6	YDR319C	YDR319C
YDR333C::chr4_6	YDR333C	YDR333C
YDR336W::chr4_6	YDR336W	YDR336W
YDR340W::chr4_7	YDR340W	YDR340W
YDR341C::chr4_7	YDR341C	YDR341C
YDR374C::chr4_7	YDR374C	YDR374C
YDR387C::chr4_7	YDR387C	YDR387C
YDR401W::chr4_7	YDR401W	YDR401W
YDR415C::chr4_7	YDR415C	YDR415C
YDR535C::chr00_2	YDR535C	YDR535C
YEL041W::chr5_2	YEL041W	YEF1
YER066C-A::chr5_3	YER066C-A	YER066C-A
YER152C::chr00_5	YER152C	YER152C
YFL012W::chr00_17a	YFL012W	YFL012W
YFR016C::chr6_1	YFR016C	YFR016C
YGL108C::chr7_2	YGL108C	YGL108C
YGL262W::chr7_3	YGL262W	YGL262W
YGR001C::chr7_3	YGR001C	YGR001C
YGR054W::chr7_4	YGR054W	YGR054W
YGR093W::chr00_14	YGR093W	YGR093W
YGR130C::chr7_5	YGR130C	YGR130C
YGR149W::chr7_5	YGR149W	YGR149W
YGR265W::chr00_3	YGR265W	YGR265W
YGR290W::chr00_3	YGR290W	YGR290W
YJL059W::chr10_2	YJL059W	YHC3
YHL005C::chr8_1	YHL005C	YHL005C
YHL037C::chr8_1	YHL037C	YHL037C
YHR180W::chr00_10	YHR180W	YHR180W
YHR210C::chr8_3	YHR210C	YHR210C
YCR059C::chr00_1	YCR059C	YIH1
YIL001W::chr9_1	YIL001W	YIL001W
YIL058W::chr00_17b	YIL058W	YIL058W
YIL077C::chr9_1	YIL077C	YIL077C
YIL092W::chr00_17b	YIL092W	YIL092W
YGL198W::chr7_3	YGL198W	YIP4
YJL017W::chr00_13	YJL016W	YJL016W
YJL045W::chr10_2	YJL045W	YJL045W
YJL163C::chr00_14	YJL163C	YJL163C
YJR012C::chr00_13	YJR012C	YJR012C
YLR200W::chr12_3	YLR200W	YKE2
YKL031W::chr11_1	YKL031W	YKL031W
YKL044W::chr11_1	YKL044W	YKL044W
YKL069W::chr11_1	YKL069W	YKL069W
YKL131W::chr11_2	YKL131W	YKL131W
YKR017C::chr11_3	YKR017C	YKR017C
YKR032W::chr11_3	YKR032W	YKR032W
YLL020C::chr12_1	YLL020C	YLL020C
YLR063W::chr12_2	YLR063W	YLR063W
YLR076C::chr12_2	YLR076C	YLR076C
YLR108C::chr12_2	YLR108C	YLR108C
YLR118C::chr12_2	YLR118C	YLR118C
YLR124W::chr12_2	YLR124W	YLR124W
YLR169W::chr12_3	YLR169W	YLR169W
YLR194C::chr12_3	YLR194C	YLR194C
YLR202C::chr12_3	YLR202C	YLR202C
YLR225C::chr12_3	YLR225C	YLR225C
YLR232W::chr12_4	YLR232W	YLR232W
YLR269C::chr12_4	YLR269C	YLR269C
YLR281C::chr12_4	YLR281C	YLR281C
YLR294C::chr12_4	YLR294C	YLR294C
YLR297W::chr12_4	YLR297W	YLR297W
YLR365W::chr12_5	YLR365W	YLR365W
YLR366W::chr12_5	YLR366W	YLR366W
YLR413W::chr12_5	YLR413W	YLR413W
YMR302C::chr13_5	YMR302C	YME2
YML018C::chr13_2	YML018C	YML018C
YML048W-A::chr13_1b	YML047W-A	YML047W-A
YML102C-A::chr00_9	YML101C-A	YML101C-A
YMR031W-A::chr13_2	YMR031W-A	YMR031W-A
YMR099C::chr00_9	YMR099C	YMR099C
YMR124W::chr00_9	YMR124W	YMR124W
YMR158C-B::chr00_4	YMR158C-A	YMR158C-A
YMR181C::chr00_8	YMR181C	YMR181C
YMR194C-A::chr00_4	YMR194C-A	YMR194C-A
YMR262W::chr13_5	YMR262W	YMR262W
YMR326C::chr00_4	YMR326C	YMR326C
YNL018C::chr00_18	YNL018C	YNL018C
YNL043C::chr14_4	YNL043C	YNL043C
YNL058C::chr14_3	YNL058C	YNL058C
YNL089C::chr14_3	YNL089C	YNL089C
YNL108C::chr14_3	YNL108C	YNL108C
YNL122C::chr14_3	YNL122C	YNL122C
YNL140C::chr00_17b	YNL140C	YNL140C
YNL144C::chr14_3	YNL144C	YNL144C
YNL179C::chr14_2	YNL179C	YNL179C
YNL193W::chr14_2	YNL193W	YNL193W
YNL234W::chr14_2	YNL234W	YNL234W
YNL247W::chr14_1	YNL247W	YNL247W
YNR005C::chr14_4	YNR005C	YNR005C
YNR014W::chr14_4	YNR014W	YNR014W
YNR061C::chr00_4	YNR061C	YNR061C
YNR065C::chr00_4	YNR065C	YNR065C
YNR073C::chr00_6	YNR073C	YNR073C
YOL024W::chr15_5	YOL024W	YOL024W
YOL035C::chr15_5	YOL035C	YOL035C
YOL036W::chr15_5	YOL036W	YOL036W
YOL107W::chr00_6	YOL107W	YOL107W
YOL153C::chr00_15	YOL153C	YOL153C
YOL163W::chr00_10	YOL163W	YOL163W
YOR008C-A::chr00_10	YOR008C-A	YOR008C-A
YOR019W::chr15_1	YOR019W	YOR019W
YOR053W::chr15_1	YOR053W	YOR053W
YOR105W::chr15_2	YOR105W	YOR105W
YOR277C::chr15_3	YOR277C	YOR277C
YOR318C::chr15_4	YOR318C	YOR318C
YOR364W::chr15_4	YOR364W	YOR364W
YOR378W::chr15_4	YOR378W	YOR378W
YER074W-A::chr00_20	YER074W-A	YOS1
YBR183W::chr2_4	YBR183W	YPC1
YPL062W::chr16_3	YPL062W	YPL062W
YPL068C::chr16_3	YPL068C	YPL068C
YPL071C::chr16_3	YPL071C	YPL071C
YPL073C::chr16_3	YPL073C	YPL073C
YPL113C::chr16_2	YPL113C	YPL113C
YPL142C::chr16_2	YPL142C	YPL142C
YPL150W::chr16_2	YPL150W	YPL150W
YPL191C::chr16_1	YPL191C	YPL191C
YPL197C::chr16_1	YPL197C	YPL197C
YPL238C::chr16_1	YPL238C	YPL238C
YPR003C::chr16_3	YPR003C	YPR003C
YPR027C::chr16_4	YPR027C	YPR027C
YPR053C::chr16_4	YPR053C	YPR053C
YPR059C::chr16_4	YPR059C	YPR059C
YPR117W::chr16_5	YPR117W	YPR117W
YPR127W::chr16_5	YPR127W	YPR127W
YPR130C::chr16_5	YPR130C	YPR130C
YPR142C::chr16_5	YPR142C	YPR142C
YPR150W::chr16_5	YPR150W	YPR150W
YPR153W::chr16_5	YPR153W	YPR153W
YPR172W::chr16_5	YPR172W	YPR172W
YLR121C::chr12_2	YLR121C	YPS3
YHR105W::chr8_2	YHR105W	YPT35
YLR262C::chr12_4	YLR262C	YPT6
YNL138W-A::chr00_21	YNL138W-A	YSF3
YHR155W::chr8_3	YHR155W	YSP1
YBR148W::chr2_3	YBR148W	YSW1
YMR089C::chr00_6	YMR089C	YTA12
YDR285W::chr4_6	YDR285W	ZIP1
YGL255W::chr7_3	YGL255W	ZRT1
