# Supplementary material for: Genes Required for Survival in Microgravity Revealed by Genome-Wide Yeast Deletion Collections Cultured during Spaceflight
Source: Biomed Res Int. 2015 Jan 13;2015:976458. doi: 10.1155/2015/976458 (PMC4309212; doi:10.1155/2015/976458)
Supplement: Supplementary file 1 — Supplementary tables 1 and 2 provide the Illumina sequencing counts for each barcode/strain of each sample following mean normalization for the homozygous strains (Supplementary Table S1) and the heterozygous deletion strains (Supplementary Table S2). Supplementary tables 3 and 4 list those strains in the homozygous deletion collection (Supplementary Table S3) and the heterozygous deletion collection (Supplementary Table S4) that were excluded from the analysis for technical reasons. Supplementary tables 5 and 6 contain the results from the analysis of the homozygous deletion collection, comparing ground experiments to flight experiments in YPD media (Supplementary Table S5) and in YPD media + 0.5M NaCl (Supplementary Table S6). Supplementary table S7 contains the concordance in GO enrichments of the experiments presented in this study to a compendium of published data (reference 13). Supplementary tables 8 and 9 contain the results from the analysis of the heterozygous deletion collection, comparing ground experiments to flight experiments in YPD media (Supplementary Table S8) and in YPD media + 0.5M NaCl (Supplementary Table S9). [file 976458.f1.zip › TableS5_vsT1-hom1-dropsToBg.xlsx]

## Sheet: README
Table S5. Genes associated with flight based on fitness defects at different time points, observed for homozygous deletion strains.
ground and flight sheets
Assessment of whether or not each strain exhibited signficant fitness defects at later time points, in different conditions (see sheet name).
Column	Description
Strain	a strain in the pool
ORF	the ORF deleted from the strain
Gene	the gene name associated with the deleted ORF
Log2ratio, 14G/21G	log2(<abundance7G>/<abundance14G/21G>) where abundanceYG represents the abundance of the strain at Y generations; larger values indicate a greater reduction in strain abundance at the later time point
P, 14/21G	significance of the reduction in strain abundance at 14/21G vs. 7G (see Methods)
Drops out, 14/21G	yes, if the strain abundance at 7G is above the background level but drops below that level at 14/21G; no, otherwise (see Methods)
Significant, 14/21G	yes, if the fitness defect at 14/21G vs. 7G is significant; specifically, (log2ratio >= 1 & P <= 0.001) or the strain drops out; no, otherwise
flight-ground sheets
Strains that exhibited signfiicant fitness defects at 14/21 generations in the flight condition but not in the ground condition.
Columns are as described for the ground and flight sheets.
flight-ground processessheets
Gene Ontology (GO) biological processes enriched (P <= 0.01) amongst flight-associated genes at 14/21 generations (see flight-ground sheets).
Column	Description
GO process	enriched GO biological process
Query set fraction	fraction of the flight genes that are annotated to the process
Process fraction	fraction of the process genes that are associated with flight
Fold enrichment	fold enrichment = <query set fraction>/<fraction of the gene universe annotated to the process>
P	P value measuring the significance of enrichment (hypergeometric test)
FDR	false discovery rate, P corrected for multiple comparisons (see Methods)
Overlap genes	|-separated list of flight-associated genes that are annotated to the process (flight log2ratios are shown in parentheses)

## Sheet: ground
Strain	ORF	Gene	Log2ratio, 14G	Log2ratio, 21G	P, 14G	P, 21G	Drops out, 14G	Drops out, 21G	Significant, 14G	Significant, 21G
YNL116W::chr14_3	YNL116W	DMA2	2.04383	1.49871	1.90627e-06	0.0408306	yes	no	yes	no
YOR097C::chr15_2	YOR097C	YOR097C	1.92418	-0.395916	6.84479e-06	0.813783	yes	no	yes	no
YCR092C::chr00_2	YCR092C	MSH3	1.79917	1.6181	2.41193e-05	0.0282571	yes	no	yes	no
YPL121C::chr16_2	YPL121C	MEI5	1.76981	0.273014	3.20585e-05	0.484955	no	no	yes	no
YHR081W::chr8_2	YHR081W	LRP1	1.69709	1.95869	6.36883e-05	0.00864726	no	yes	yes	yes
YKL079W::chr11_1	YKL079W	SMY1	1.67706	0.375045	7.65966e-05	0.428766	no	no	yes	no
YOR312C::chr15_4	YOR312C	RPL20B	1.62769	1.62769	0.000119688	0.0274054	yes	yes	yes	yes
YBR015C::chr2_2	YBR015C	MNN2	1.61726	0.823536	0.000131313	0.211043	yes	no	yes	no
YOR290C::chr15_4	YOR290C	SNF2	1.61007	1.06867	0.000139944	0.126419	yes	no	yes	no
YDR300C::chr4_6	YDR300C	PRO1	1.60481	-0.335305	0.000146585	0.790365	no	no	yes	no
YOR187W::chr15_2	YOR187W	TUF1	1.50358	3.07451	0.000348636	4.22815e-05	no	yes	yes	yes
YNL084C::chr14_3	YNL084C	END3	1.47256	2.30411	0.000450115	0.00211536	no	yes	yes	yes
YJL175W::chr00_14	YJL175W	YJL175W	1.46711	1.30438	0.00047054	0.0706369	yes	no	yes	no
YIL130W::chr9_2	YIL130W	ASG1	1.46406	-1.36355	0.000482339	0.987347	no	no	yes	no
YDR450W::chr4_8	YDR450W	RPS18A	1.45924	1.57974	0.000501592	0.0318881	no	yes	yes	yes
YDR509W::chr4_8	YDR509W	YDR509W	1.44964	2.44641	0.000541972	0.00111337	no	yes	yes	yes
YDR268W::chr4_6	YDR268W	MSW1	1.40195	1.40195	0.000791172	0.0540643	yes	yes	yes	yes
YBR194W::chr2_4	YBR194W	AIM4	1.40167	-0.499844	0.000792923	0.849982	no	no	yes	no
YNL284C::chr00_18	YNL284C	MRPL10	1.39333	-0.0282183	0.000846206	0.648367	yes	no	yes	no
YNR068C::chr00_4	YNR068C	YNR068C	1.39325	0.672378	0.000846707	0.276679	no	no	yes	no
YDL113C::chr4_2	YDL113C	ATG20	1.38465	0.537548	0.000905105	0.342608	yes	no	yes	no
YGR118W::chr7_4	YGR118W	RPS23A	1.38029	1.92156	0.000936099	0.00993517	no	no	yes	no
YGL135W::chr7_2	YGL135W	RPL1B	1.37746	1.5176	0.000956713	0.0385827	no	yes	yes	yes
YOR101W::chr15_2	YOR101W	RAS1	1.3649	0.356851	0.00105348	0.438713	no	no	no	no
YOL093W::chr00_6	YOL093W	TRM10	1.3556	2.1628	0.00113073	0.00386033	no	yes	no	yes
YMR052W::chr00_5	YMR052W	FAR3	1.34447	0.626372	0.00123009	0.298473	no	no	no	no
YGR257C::chr00_17a	YGR257C	MTM1	1.33795	0.856506	0.00129193	0.198044	no	no	no	no
YPL042C::chr16_3	YPL042C	SSN3	1.33234	2.64023	0.00134742	0.000438061	no	yes	no	yes
YML036W::chr00_11	YML036W	CGI121	1.32489	1.32489	0.00142444	0.0668638	yes	yes	yes	yes
YOR096W::chr00_8	YOR096W	RPS7A	1.32112	1.37592	0.00146496	0.0581517	no	yes	no	yes
YJR122W::chr00_12	YJR122W	IBA57	1.30262	-0.220561	0.00167928	0.74158	no	no	no	no
YDR517W::chr4_8	YDR517W	GRH1	1.29487	-0.0934515	0.00177724	0.681385	yes	no	yes	no
YBR077C::chr2_2	YBR077C	SLM4	1.29023	1.29023	0.00183836	0.0733343	yes	yes	yes	yes
YDR017C::chr4_3	YDR017C	KCS1	1.28787	3.18317	0.00187023	2.23152e-05	no	yes	no	yes
YML024W::chr13_2	YML024W	RPS17A	1.28468	0.193527	0.001914	0.528996	no	no	no	no
YGL105W::chr7_2	YGL105W	ARC1	1.27335	1.83903	0.00207734	0.0134113	no	yes	no	yes
YML014W::chr13_2	YML014W	TRM9	1.26952	2.13978	0.00213527	0.00424354	no	yes	no	yes
YLR287C-A::chr12_4	YLR287C-A	RPS30A	1.26748	1.92164	0.00216673	0.00993226	no	no	no	no
YIR031C::chr00_3	YIR031C	DAL7	1.26168	1.59165	0.00225859	0.030722	no	no	no	no
YKL048C::chr11_1	YKL048C	ELM1	1.25994	1.26208	0.00228674	0.0789342	no	yes	no	yes
YHL034C::chr8_1	YHL034C	SBP1	1.25451	1.70875	0.00237688	0.0210245	no	yes	no	yes
YNR008W::chr14_4	YNR008W	LRO1	1.2478	0.574996	0.00249271	0.323692	yes	no	yes	no
YPL064C::chr16_3	YPL064C	CWC27	1.24414	1.30411	0.00255793	0.070689	no	yes	no	yes
YJL129C::chr00_14	YJL129C	TRK1	1.23435	1.26762	0.00274033	0.0778088	no	yes	no	yes
YKR039W::chr00_14	YKR039W	GAP1	1.23048	0.668555	0.00281552	0.27846	no	no	no	no
YAL056W::chr1_1	YAL056W	GPB2	1.21676	1.05011	0.0030975	0.13185	no	no	no	no
YDR442W::chr4_8	YDR442W	YDR442W	1.21671	2.71914	0.00309865	0.000293856	no	yes	no	yes
YOR205C::chr15_3	YOR205C	GEP3	1.20463	0.00888164	0.00336785	0.629057	no	no	no	no
YEL031W::chr5_2	YEL031W	SPF1	1.19261	0.26575	0.00365633	0.488981	no	no	no	no
YPL029W::chr16_3	YPL029W	SUV3	1.19164	-0.273976	0.00368075	0.764993	no	no	no	no
YER017C::chr5_3	YER017C	AFG3	1.17218	0.489439	0.00419796	0.367495	no	no	no	no
YHR066W::chr8_2	YHR066W	SSF1	1.16067	1.08728	0.00453379	0.121134	no	no	no	no
YOR167C::chr15_2	YOR167C	RPS28A	1.15723	1.31688	0.00463875	0.0683187	no	no	no	no
YDL056W::chr4_1	YDL056W	MBP1	1.15381	-0.240507	0.00474514	0.750462	no	no	no	no
YML026C::chr13_2	YML026C	RPS18B	1.15305	1.86509	0.00476898	0.0122146	no	yes	no	yes
YKR099W::chr00_4	YKR099W	BAS1	1.15001	-0.204192	0.00486614	0.73417	no	no	no	no
YCR034W::chr00_1	YCR034W	FEN1	1.1454	1.66104	0.00501629	0.0246073	no	yes	no	yes
YOR201C::chr15_3	YOR201C	MRM1	1.14158	-0.338185	0.00514383	0.791516	no	no	no	no
YLR328W::chr12_5	YLR328W	NMA1	1.14052	1.45058	0.00517984	0.0470422	no	yes	no	yes
YCL058C::chr00_12	YCL058C	FYV5	1.13984	1.26311	0.00520302	0.0787235	no	yes	no	yes
YDR305C::chr4_6	YDR305C	HNT2	1.13105	1.38221	0.00551064	0.0571429	no	no	no	no
YOR371C::chr15_4	YOR371C	GPB1	1.12983	1.11667	0.00555452	0.113102	no	no	no	no
YNL073W::chr00_16b	YNL073W	MSK1	1.12813	1.08838	0.00561653	0.120824	yes	no	yes	no
YHR064C::chr00_8	YHR064C	SSZ1	1.12182	1.46082	0.00585134	0.0456601	no	yes	no	yes
YHR010W::chr8_1	YHR010W	RPL27A	1.1175	0.143618	0.00601695	0.556503	no	no	no	no
YLR349W::chr12_5	YLR349W	YLR349W	1.11736	0.76785	0.00602253	0.234098	no	no	no	no
YJR032W::chr00_13	YJR032W	CPR7	1.10779	1.74854	0.00640477	0.018384	no	yes	no	yes
YPL223C::chr16_1	YPL223C	GRE1	1.10722	0.825859	0.00642811	0.210111	no	no	no	no
YLR200W::chr12_3	YLR200W	YKE2	1.10718	1.10718	0.00642958	0.115653	yes	yes	yes	yes
YMR269W::chr13_5	YMR269W	TMA23	1.10162	1.61726	0.00666218	0.0283323	no	yes	no	yes
YLR079W::chr12_2	YLR079W	SIC1	1.09925	1.09925	0.00676374	0.117816	yes	yes	yes	yes
YLR373C::chr12_5	YLR373C	VID22	1.09659	1.09659	0.00687891	0.118546	yes	yes	yes	yes
YLR097C::chr12_2	YLR097C	HRT3	1.0958	0.950393	0.00691361	0.163764	no	no	no	no
YEL050C::chr5_2	YEL050C	RML2	1.09283	2.15007	0.00704536	0.00406815	no	no	no	no
YBL007C::chr2_1	YBL007C	SLA1	1.09127	1.09127	0.00711512	0.12002	yes	yes	yes	yes
YLR003C::chr12_1	YLR003C	CMS1	1.08325	1.44538	0.00748428	0.0477555	no	no	no	no
YBL099W::chr2_2	YBL099W	ATP1	1.0811	-0.58745	0.00758611	0.87659	no	no	no	no
YJR063W::chr00_13	YJR063W	RPA12	1.07794	1.84468	0.00773803	0.0131439	no	yes	no	yes
YMR279C::chr00_8	YMR279C	YMR279C	1.07648	0.184345	0.00780917	0.534071	no	no	no	no
YOL087C::chr00_6	YOL087C	DUF1	1.07561	-0.766653	0.00785183	0.920309	yes	no	yes	no
YPL102C::chr16_2	YPL102C	YPL102C	1.07425	0.807872	0.00791905	0.21739	no	no	no	no
YDR225W::chr4_5	YDR225W	HTA1	1.07276	-0.476703	0.00799319	0.842358	no	no	no	no
YIR038C::chr00_3	YIR038C	GTT1	1.07031	0.623035	0.00811591	0.300083	no	no	no	no
YGL215W::chr7_3	YGL215W	CLG1	1.06883	0.043222	0.00819145	0.610887	no	no	no	no
YDL090C::chr4_1	YDL090C	RAM1	1.0609	3.06918	0.00860461	4.36023e-05	no	yes	no	yes
YLR435W::chr00_4	YLR435W	TSR2	1.05874	1.81914	0.00872024	0.0143915	no	yes	no	yes
YNL227C::chr14_2	YNL227C	JJJ1	1.05721	1.08593	0.0088026	0.121512	no	yes	no	yes
YCR049C::chr00_1	YCR049C	YCR049C	1.05185	1.00434	0.00909839	0.145923	no	no	no	no
YLR425W::chr00_4	YLR425W	TUS1	1.05091	-0.26782	0.00915068	0.762356	no	no	no	no
YLR069C::chr12_2	YLR069C	MEF1	1.05084	-0.932204	0.00915466	0.949209	no	no	no	no
YPR043W::chr00_15	YPR043W	RPL43A	1.05061	3.72665	0.00916772	6.57752e-07	no	no	no	yes
YAL040C::chr1_1	YAL040C	CLN3	1.04796	1.04796	0.00931797	0.13249	yes	yes	yes	yes
YBR181C::chr2_4	YBR181C	RPS6B	1.0468	1.71375	0.00938423	0.0206764	no	no	no	no
YBR041W::chr2_2	YBR041W	FAT1	1.04627	0.155303	0.009415	0.550082	no	no	no	no
YPL018W::chr16_3	YPL018W	CTF19	1.04521	1.04521	0.00947613	0.133311	yes	yes	yes	yes
YLR368W::chr12_5	YLR368W	MDM30	1.04388	0.291715	0.00955307	0.474601	no	no	no	no
YNL155W::chr14_2	YNL155W	YNL155W	1.03492	1.14034	0.0100888	0.106919	no	no	no	no
YFR032C-A::chr00_2	YFR032C-A	RPL29	1.03416	1.75702	0.0101352	0.0178595	no	no	no	no
YGR123C::chr7_5	YGR123C	PPT1	1.02852	1.47552	0.0104868	0.0437346	no	no	no	no
YEL012W::chr00_10	YEL012W	UBC8	1.02825	1.07787	0.0105039	0.123785	no	yes	no	yes
YDR241W::chr4_5	YDR241W	BUD26	1.02471	1.2454	0.0107308	0.0824015	no	yes	no	yes
YIL152W::chr9_2	YIL152W	YIL152W	1.02177	1.04521	0.0109218	0.133311	no	yes	no	yes
YNL079C::chr00_16b	YNL079C	TPM1	1.01741	1.01741	0.011211	0.141806	yes	yes	yes	yes
YCR028C::chr00_1	YCR028C	FEN2	1.01725	2.15006	0.0112215	0.00406845	no	yes	no	yes
YFL033C::chr00_17a/chr00_18	YFL033C	RIM15	1.0162	-0.0622175	0.0112921	0.665735	no	no	no	no
YGL147C::chr7_2	YGL147C	RPL9A	1.01389	1.33779	0.011449	0.0645713	no	yes	no	yes
YPR196W::chr16_5	YPR196W	YPR196W	1.01164	0.492351	0.0116038	0.365971	no	no	no	no
YPL070W::chr16_3	YPL070W	MUK1	1.01163	1.83564	0.0116046	0.013574	no	no	no	no
YPR133W-A::chr00_18	YPR133W-A	TOM5	1.01032	1.74149	0.0116954	0.01883	no	no	no	no
YMR060C::chr00_4	YMR060C	SAM37	1.00151	0.185917	0.0123226	0.533202	no	no	no	no
YOR083W::chr15_1	YOR083W	WHI5	1.00051	-0.172686	0.0123953	0.719612	no	no	no	no
YCL062W::chr3_1	YCL063W	VAC17	0.997173	-1.21221	0.0126418	0.978636	no	no	no	no
YLR312C::chr12_4	YLR312C	YLR312C	0.996836	1.06707	0.0126669	0.126882	no	yes	no	yes
YMR284W::chr13_5	YMR284W	YKU70	0.992212	1.04866	0.0130157	0.13228	no	no	no	no
YLR137W::chr12_3	YLR137W	RKM5	0.991925	0.991925	0.0130377	0.149909	yes	yes	yes	yes
YDL047W::chr4_1	YDL047W	SIT4	0.987374	1.57727	0.0133896	0.0321344	no	no	no	no
YHR021C::chr8_1	YHR021C	RPS27B	0.980578	1.73008	0.0139304	0.0195718	no	no	no	no
YMR216C::chr13_4	YMR216C	SKY1	0.978958	-1.20013	0.0140621	0.977762	no	no	no	no
YDR126W::chr4_4	YDR126W	SWF1	0.978902	1.2721	0.0140667	0.076905	no	yes	no	yes
YMR143W::chr13_4	YMR143W	RPS16A	0.972438	0.945829	0.0146029	0.165335	no	no	no	no
YPL188W::chr16_1	YPL188W	POS5	0.970001	1.53731	0.0148096	0.0363454	no	yes	no	yes
YIL160C::chr9_2	YIL160C	POT1	0.968285	0.604938	0.0149567	0.308886	no	no	no	no
YNL129W::chr14_3	YNL129W	NRK1	0.967523	1.01602	0.0150224	0.142241	no	no	no	no
YHL030W::chr8_1	YHL030W	ECM29	0.96307	0.133541	0.0154113	0.562028	yes	no	yes	no
YPL002C::chr16_3	YPL002C	SNF8	0.961569	3.06842	0.0155442	4.37934e-05	no	yes	no	yes
YLL007C::chr00_10	YLL007C	YLL007C	0.96007	1.75494	0.0156781	0.0179871	no	yes	no	yes
YMR077C::chr00_6	YMR077C	VPS20	0.9577	2.45096	0.0158917	0.00109011	no	yes	no	yes
YHL040C::chr8_1	YHL040C	ARN1	0.95646	0.581938	0.0160045	0.320233	no	no	no	no
YPL205C::chr16_1	YPL205C	YPL205C	0.954413	0.732251	0.0161921	0.249538	no	no	no	no
YMR116C::chr00_9	YMR116C	ASC1	0.952414	0.952414	0.0163772	0.163071	yes	yes	yes	yes
YCL016C::chr3_1	YCL016C	DCC1	0.949644	1.51104	0.0166366	0.0393511	no	yes	no	yes
YEL046C::chr5_2	YEL046C	GLY1	0.946604	0.991913	0.0169253	0.149913	no	no	no	no
YER117W::chr00_5	YER117W	RPL23B	0.945438	0.32454	0.0170372	0.456471	no	no	no	no
YML094W::chr00_9	YML094W	GIM5	0.938411	2.16277	0.0177249	0.00386078	no	yes	no	yes
YPL071C::chr16_3	YPL071C	YPL071C	0.938186	0.800157	0.0177473	0.220556	no	no	no	no
YKL176C::chr11_2	YKL176C	LST4	0.933314	1.43385	0.0182384	0.0493704	no	yes	no	yes
YML076C::chr00_11	YML076C	WAR1	0.930862	0.9543	0.0184899	0.162426	no	yes	no	yes
YDR143C::chr4_4	YDR143C	SAN1	0.929368	0.971382	0.0186447	0.156661	no	no	no	no
YNL025C::chr14_4	YNL025C	SSN8	0.928722	3.01667	0.0187119	5.88897e-05	no	yes	no	yes
YOR364W::chr15_4	YOR364W	YOR364W	0.927396	0.997627	0.0188506	0.148069	no	yes	no	yes
YMR065W::chr00_6	YMR065W	KAR5	0.927192	1.25019	0.0188719	0.0813952	no	yes	no	yes
YKL213C::chr11_3	YKL213C	DOA1	0.927093	1.76165	0.0188824	0.0175781	no	yes	no	yes
YAR002W::chr1_1	YAR002W	NUP60	0.922278	1.19499	0.0193939	0.0935782	no	no	no	no
YMR083W::chr00_6	YMR083W	ADH3	0.920398	0.505446	0.0195967	0.359146	no	no	no	no
YCR081W::chr00_1	YCR081W	SRB8	0.919129	2.61634	0.0197347	0.00049325	no	yes	no	yes
YOR072W::chr15_1	YOR072W	YOR072W	0.915807	2.17292	0.0200998	0.003702	no	yes	no	yes
YMR282C::chr13_5	YMR282C	AEP2	0.915166	1.80035	0.020171	0.0153733	no	no	no	no
YDR310C::chr4_6	YDR310C	SUM1	0.913322	2.01866	0.0203768	0.00687512	no	no	no	no
YDL115C::chr4_2	YDL115C	IWR1	0.912587	1.32686	0.0204592	0.066509	no	no	no	no
YAR042W::chr1_1	YAR042W	SWH1	0.911785	0.632548	0.0205496	0.295502	no	no	no	no
YML012W::chr13_2	YML012W	ERV25	0.910435	1.67687	0.0207025	0.0233654	no	no	no	no
YPL047W::chr16_3	YPL047W	SGF11	0.908647	1.30636	0.0209063	0.0702669	no	no	no	no
YBR053C::chr2_2	YBR053C	YBR053C	0.908439	1.07943	0.0209302	0.123344	no	no	no	no
YDR256C::chr4_6	YDR256C	CTA1	0.906844	1.3459	0.0211137	0.0631623	no	no	no	no
YCR020W-B::chr00_1	YCR020W-B	HTL1	0.906648	3.21916	0.0211363	1.79713e-05	no	no	no	yes
YLR107W::chr12_2	YLR107W	REX3	0.906426	0.260753	0.0211619	0.49175	no	no	no	no
YMR307W::chr13_5	YMR307W	GAS1	0.906367	-3.03647	0.0211688	0.999997	no	no	no	no
YNL091W::chr00_16b	YNL091W	NST1	0.899118	2.00472	0.022022	0.00725549	no	yes	no	yes
YBR035C::chr2_2	YBR035C	PDX3	0.898656	-0.385433	0.0220774	0.809853	no	no	no	no
YBR048W::chr2_2	YBR048W	RPS11B	0.891149	0.953535	0.0229931	0.162688	no	no	no	no
YJL115W::chr10_2	YJL115W	ASF1	0.889554	0.889554	0.0231918	0.185513	yes	yes	yes	yes
YJL048C::chr10_2	YJL048C	UBX6	0.88948	1.03818	0.0232011	0.135425	no	no	no	no
YJL102W::chr10_2	YJL102W	MEF2	0.889237	-0.851487	0.0232314	0.936377	no	no	no	no
YLR142W::chr12_3	YLR142W	PUT1	0.88846	1.78653	0.0233289	0.0161317	no	no	no	no
YLR324W::chr12_5	YLR324W	PEX30	0.885266	0.447338	0.0237331	0.389744	no	no	no	no
YGL213C::chr7_3	YGL213C	SKI8	0.885229	0.885229	0.0237377	0.187124	yes	yes	yes	yes
YPL008W::chr16_3	YPL008W	CHL1	0.885229	0.885229	0.0237377	0.187124	yes	yes	yes	yes
YOR239W::chr15_3	YOR239W	ABP140	0.883945	0.0657931	0.023902	0.598809	no	no	no	no
YML104C::chr00_9	YML104C	MDM1	0.877288	0.272113	0.0247683	0.485454	no	no	no	no
YPL180W::chr16_2	YPL180W	TCO89	0.875681	-0.319231	0.0249813	0.783876	no	no	no	no
YCR006C::chr3_1	YCR006C	YCR006C	0.872872	-0.778087	0.0253575	0.922638	yes	no	yes	no
YGL251C::chr7_3	YGL251C	HFM1	0.871093	1.12381	0.0255981	0.111212	no	no	no	no
YLR081W::chr12_2	YLR081W	GAL2	0.871085	1.28558	0.0255992	0.0742385	no	yes	no	yes
YNL056W::chr00_16b	YNL056W	OCA2	0.870778	2.39765	0.025641	0.00139295	no	yes	no	yes
YDR296W::chr4_6	YDR296W	MHR1	0.869766	-0.38537	0.0257788	0.809829	yes	no	yes	no
YMR294W-A::chr13_5	YMR294W-A	YMR294W-A	0.868952	1.25496	0.0258903	0.0804015	no	yes	no	yes
YKL011C::chr11_1	YKL011C	CCE1	0.867102	0.758672	0.0261449	0.238027	no	no	no	no
YOR001W::chr15_1	YOR001W	RRP6	0.863058	2.58164	0.0267089	0.000584931	no	yes	no	yes
YMR014W::chr13_2	YMR014W	BUD22	0.860921	0.879064	0.0270111	0.189436	no	yes	no	yes
YKL039W::chr11_1	YKL039W	PTM1	0.858101	0.576505	0.0274141	0.322939	no	no	no	no
YLL045C::chr12_1	YLL045C	RPL8B	0.857442	0.881615	0.0275089	0.188477	no	no	no	no
YBL100C::chr2_2	YBL100C	YBL100C	0.856823	-0.566135	0.0275984	0.870442	no	no	no	no
YNR062C::chr00_4	YNR062C	YNR062C	0.856632	0.613673	0.027626	0.304623	no	no	no	no
YBR090C::chr00_16a	YBR090C	YBR090C	0.855777	-0.0944827	0.02775	0.681896	no	no	no	no
YNL135C::chr14_3	YNL135C	FPR1	0.855584	0.148743	0.0277781	0.553688	no	no	no	no
YNL293W::chr14_1	YNL293W	MSB3	0.852092	0.42709	0.0282897	0.40058	no	no	no	no
YLR434C::chr00_4	YLR434C	YLR434C	0.850759	0.604436	0.028487	0.309132	no	no	no	no
YLR058C::chr12_2	YLR058C	SHM2	0.850356	0.392531	0.0285469	0.419247	no	no	no	no
YMR167W::chr13_4	YMR167W	MLH1	0.84851	0.866654	0.0288225	0.194143	no	yes	no	yes
YDR385W::chr4_7	YDR385W	EFT2	0.848225	1.54821	0.0288653	0.0351546	no	no	no	no
YJL017W::chr00_13	YJL016W	YJL016W	0.847836	0.847836	0.0289239	0.201415	yes	yes	yes	yes
YIL100W::chr9_2	YIL100W	YIL100W	0.847458	0.238247	0.0289807	0.504227	no	no	no	no
YPR118W::chr00_18	YPR118W	MRI1	0.844476	1.06978	0.0294327	0.126101	no	yes	no	yes
YNR031C::chr14_4	YNR031C	SSK2	0.843086	-0.138835	0.0296454	0.703552	no	no	no	no
YDR259C::chr4_6	YDR259C	YAP6	0.840097	0.967156	0.0301071	0.158075	no	no	no	no
YIR025W::chr00_3	YIR025W	MND2	0.838724	0.790637	0.0303212	0.224499	no	no	no	no
YKR045C::chr11_3	YKR045C	YKR045C	0.838379	0.100653	0.0303751	0.57997	no	no	no	no
YMR115W::chr00_9	YMR115W	MGR3	0.838334	0.838334	0.0303823	0.205148	yes	yes	yes	yes
YBR050C::chr2_2	YBR050C	REG2	0.836939	0.927885	0.0306014	0.171609	no	no	no	no
YMR029C::chr13_2	YMR029C	FAR8	0.836146	-0.831938	0.0307266	0.932918	no	no	no	no
YGR254W::chr00_17a	YGR254W	ENO1	0.834472	0.553399	0.0309922	0.334549	no	no	no	no
YDR363W::chr4_7	YDR363W	ESC2	0.833327	0.892156	0.0311749	0.184547	no	no	no	no
YDR414C::chr4_7	YDR414C	ERD1	0.832251	1.14044	0.0313474	0.106893	no	no	no	no
YLR382C::chr00_11	YLR382C	NAM2	0.832122	-0.548452	0.0313683	0.865184	no	no	no	no
YOL162W::chr00_10	YOL162W	YOL162W	0.831778	0.877369	0.0314236	0.190075	no	no	no	no
YDL041W::chr4_1	YDL041W	YDL041W	0.82993	0.82993	0.0317225	0.208484	yes	yes	yes	yes
YNL147W::chr00_18	YNL147W	LSM7	0.829713	2.70524	0.0317577	0.000315526	no	no	no	yes
YBL106C::chr2_2	YBL106C	SRO77	0.826593	0.619488	0.0322679	0.3018	no	no	no	no
YEL029C::chr5_2	YEL029C	BUD16	0.825446	2.04709	0.0324572	0.00615303	no	yes	no	yes
YNL065W::chr00_16b	YNL065W	AQR1	0.824205	0.975525	0.0326631	0.155284	no	no	no	no
YDL191W::chr4_3	YDL191W	RPL35A	0.822357	-1.40621	0.0329716	0.989161	yes	no	yes	no
YPL159C::chr16_2	YPL159C	PET20	0.818595	0.146637	0.033607	0.554845	no	no	no	no
YKR082W::chr00_3	YKR082W	NUP133	0.81622	1.61726	0.0340134	0.0283323	no	yes	no	yes
YDR248C::chr4_6	YDR248C	YDR248C	0.815123	0.337161	0.0342024	0.449522	no	no	no	no
YMR042W::chr13_2	YMR042W	ARG80	0.814763	0.00705243	0.0342647	0.630017	no	no	no	no
YNL175C::chr14_2	YNL175C	NOP13	0.814166	1.20723	0.034368	0.0907668	no	no	no	no
YMR064W::chr00_6	YMR064W	AEP1	0.813589	0.168727	0.0344683	0.54269	no	no	no	no
YNL119W::chr00_16b	YNL119W	NCS2	0.812685	0.791395	0.0346256	0.224184	yes	no	yes	no
YNL154C::chr14_2	YNL154C	YCK2	0.812337	1.20654	0.0346863	0.0909237	no	yes	no	yes
YJR015W::chr00_13	YJR015W	YJR015W	0.811542	-0.577915	0.0348255	0.873865	no	no	no	no
YLR189C::chr12_3	YLR189C	ATG26	0.810144	-0.509544	0.0350714	0.853103	no	no	no	no
YLR217W::chr12_3	YLR217W	YLR217W	0.807125	1.16407	0.035607	0.100967	no	yes	no	yes
YDR519W::chr4_8	YDR519W	FPR2	0.805751	0.792827	0.035853	0.223589	no	no	no	no
YJR050W::chr00_13	YJR050W	ISY1	0.805141	2.39225	0.0359626	0.00142757	no	yes	no	yes
YOL011W::chr15_5	YOL011W	PLB3	0.804666	0.800171	0.0360482	0.22055	no	no	no	no
YJL217W::chr10_1	YJL217W	REE1	0.80466	0.46189	0.0360493	0.382008	no	no	no	no
YPL103C::chr16_2	YPL103C	FMP30	0.80258	0.692802	0.0364259	0.267261	no	no	no	no
YHR158C::chr8_3	YHR158C	KEL1	0.800204	0.733201	0.0368602	0.249119	no	no	no	no
YHL031C::chr8_1	YHL031C	GOS1	0.799541	0.792746	0.0369821	0.223622	no	no	no	no
YOR127W::chr15_2	YOR127W	RGA1	0.795953	1.19385	0.0376477	0.0938435	no	yes	no	yes
YDR265W::chr4_6	YDR265W	PEX10	0.795134	0.541659	0.037801	0.340511	no	no	no	no
YHL002W::chr00_10	YHL002W	HSE1	0.794333	0.573395	0.0379513	0.324492	no	no	no	no
YPL224C::chr00_11	YPL224C	MMT2	0.793208	0.030982	0.0381634	0.617394	no	no	no	no
YDR496C::chr4_8	YDR496C	PUF6	0.793145	0.793145	0.0381754	0.223457	yes	yes	yes	yes
YGR165W::chr7_5	YGR165W	MRPS35	0.790939	-0.644831	0.038594	0.892114	no	no	no	no
YDR294C::chr4_6	YDR294C	DPL1	0.78945	0.788427	0.0388789	0.22542	no	no	no	no
YPL213W::chr16_1	YPL213W	LEA1	0.788924	1.6265	0.0389798	0.0275101	no	yes	no	yes
YKR005C::chr11_3	YKR005C	YKR005C	0.788425	-0.152787	0.0390759	0.710223	no	no	no	no
YHR138C::chr8_2	YHR138C	YHR138C	0.787697	0.665109	0.0392163	0.28007	no	no	no	no
YGL129C::chr7_2	YGL129C	RSM23	0.786638	0.713403	0.0394213	0.257927	no	no	no	no
YDR344C::chr4_7	YDR344C	YDR344C	0.786636	0.344039	0.0394217	0.445742	no	no	no	no
YKL077W::chr11_1	YKL077W	YKL077W	0.786572	-1.47251	0.0394341	0.991532	yes	no	yes	no
YLR370C::chr00_11	YLR370C	ARC18	0.784854	1.35481	0.0397685	0.0616402	no	yes	no	yes
YGL235W::chr7_3/chr00_12	YGL235W	YGL235W	0.781545	-0.301703	0.0404195	0.776669	no	no	no	no
YML013W::chr13_2	YML013W	UBX2	0.779969	0.374938	0.0407323	0.428824	yes	no	yes	no
YNL276C::chr14_1	YNL276C	YNL276C	0.779655	0.684476	0.040795	0.27108	no	no	no	no
YDR340W::chr4_7	YDR340W	YDR340W	0.778258	0.689053	0.0410745	0.268977	no	no	no	no
YPR139C::chr16_5	YPR139C	LOA1	0.777983	0.054221	0.0411297	0.605014	no	no	no	no
YHR203C::chr8_3	YHR203C	RPS4B	0.776711	1.25687	0.0413856	0.0800067	no	no	no	no
YKR029C::chr00_14	YKR029C	SET3	0.776657	0.776657	0.0413966	0.230362	yes	yes	yes	yes
YPR004C::chr16_3	YPR004C	AIM45	0.775091	0.31716	0.0417136	0.460541	no	no	no	no
YOR289W::chr15_4	YOR289W	YOR289W	0.774077	0.774077	0.0419201	0.231453	yes	yes	yes	yes
YLR095C::chr12_2	YLR095C	IOC2	0.773336	0.00520778	0.0420713	0.630985	yes	no	yes	no
YDR347W::chr4_7	YDR347W	MRP1	0.771812	0.614142	0.0423839	0.304395	no	no	no	no
YLR126C::chr12_3	YLR126C	YLR126C	0.771646	0.549236	0.0424181	0.336659	no	no	no	no
YML080W::chr13_1b	YML080W	DUS1	0.77143	0.48399	0.0424625	0.370351	no	no	no	no
YNL217W::chr14_2	YNL217W	YNL217W	0.768483	1.2188	0.0430734	0.088168	no	yes	no	yes
YOR089C::chr15_1	YOR089C	VPS21	0.767857	0.24237	0.0432041	0.501941	no	no	no	no
YGL263W::chr7_3	YGL263W	COS12	0.766996	0.782099	0.0433841	0.228069	no	no	no	no
YLR057W::chr12_2	YLR057W	MNL2	0.766868	0.881481	0.043411	0.188527	no	no	no	no
YPL078C::chr00_17b	YPL078C	ATP4	0.764452	0.272389	0.0439201	0.485302	no	no	no	no
YNL070W::chr00_16b	YNL070W	TOM7	0.763321	1.59487	0.0441603	0.0304127	no	yes	no	yes
YNL142W::chr00_17b	YNL142W	MEP2	0.762155	0.232202	0.0444089	0.507579	no	no	no	no
YDR402C::chr4_7	YDR402C	DIT2	0.761439	0.314348	0.044562	0.462092	no	no	no	no
YDR329C::chr4_6	YDR329C	PEX3	0.760796	0.530059	0.0446999	0.346441	no	no	no	no
YJL146W::chr10_1	YJL146W	IDS2	0.760518	1.21838	0.0447596	0.0882609	no	no	no	no
YGR135W::chr7_5	YGR135W	PRE9	0.760251	0.494097	0.044817	0.365058	no	no	no	no
YLR356W::chr12_5	YLR356W	ATG33	0.760126	0.744247	0.044844	0.244275	no	no	no	no
YHR154W::chr8_3	YHR154W	RTT107	0.759978	0.759978	0.0448758	0.237466	yes	yes	yes	yes
YGR232W::chr00_2	YGR232W	NAS6	0.759551	0.511314	0.0449678	0.356102	no	no	no	no
YOR211C::chr15_3	YOR211C	MGM1	0.758031	0.109274	0.0452969	0.575281	no	no	no	no
YBR195C::chr2_4	YBR195C	MSI1	0.757078	1.43595	0.045504	0.049073	no	yes	no	yes
YAR020C::chr1_1	YAR020C	PAU7	0.755424	0.791368	0.0458657	0.224195	no	no	no	no
YGL136C::chr7_2	YGL136C	MRM2	0.754968	0.700041	0.0459658	0.263962	yes	no	yes	no
YMR027W::chr13_2	YMR027W	YMR027W	0.754877	0.528453	0.0459858	0.347265	no	no	no	no
YDR485C::chr4_8	YDR485C	VPS72	0.75414	2.3087	0.0461479	0.00207315	no	yes	no	yes
YBL047C::chr2_1	YBL047C	EDE1	0.751537	2.2914	0.0467243	0.00223623	no	yes	no	yes
YPL239W::chr16_1	YPL239W	YAR1	0.751151	1.47782	0.0468103	0.0434398	no	no	no	no
YFR030W::chr00_15	YFR030W	MET10	0.75004	1.63201	0.0470584	0.0270288	no	yes	no	yes
YPL072W::chr16_3	YPL072W	UBP16	0.749877	0.749877	0.0470948	0.241826	yes	yes	yes	yes
YML010C-B::chr00_4	YML009C-A	YML009C-A	0.749095	1.34945	0.0472703	0.0625531	no	no	no	no
YHL027W::chr8_1	YHL027W	RIM101	0.748887	0.903569	0.047317	0.18035	no	yes	no	yes
YPL023C::chr16_3	YPL023C	MET12	0.746495	-0.0253189	0.0478573	0.646871	yes	no	yes	no
YOL160W::chr00_10	YOL160W	YOL160W	0.745808	1.29487	0.0480133	0.0724414	no	yes	no	yes
YMR326C::chr00_4	YMR326C	YMR326C	0.743823	0.604568	0.0484666	0.309067	no	no	no	no
YHR059W::chr00_10	YHR059W	FYV4	0.742919	2.30296	0.048674	0.00212606	no	yes	no	yes
YAL002W::chr1_1	YAL002W	VPS8	0.742743	3.17317	0.0487144	2.36884e-05	no	no	no	yes
YEL064C::chr5_2	YEL064C	AVT2	0.742264	0.882191	0.0488248	0.188261	no	no	no	no
YPL051W::chr16_3	YPL051W	ARL3	0.741537	0.067387	0.0489927	0.597952	no	no	no	no
YNL226W::chr14_2	YNL226W	YNL226W	0.741516	2.42541	0.0489975	0.00122678	no	yes	no	yes
YOR002W::chr15_1	YOR002W	ALG6	0.738514	-0.379535	0.0496954	0.80762	no	no	no	no
YLR049C::chr12_2	YLR049C	YLR049C	0.738316	0.14305	0.0497418	0.556814	no	no	no	no
YJL206C-A::chr10_1	YJL205C	NCE101	0.73768	1.70178	0.0498908	0.0215186	no	yes	no	yes
YJL183W::chr10_1	YJL183W	MNN11	0.73413	-0.0153641	0.050729	0.641717	no	no	no	no
YER096W::chr00_8	YER096W	SHC1	0.732809	1.482	0.0510436	0.0429068	no	no	no	no
YNL043C::chr14_4	YNL043C	YNL043C	0.732365	0.742874	0.0511497	0.244875	no	no	no	no
YKL027W::chr11_1	YKL027W	YKL027W	0.73228	0.847836	0.0511701	0.201415	no	yes	no	yes
YNL270C::chr14_1	YNL270C	ALP1	0.731333	0.382527	0.0513971	0.424688	no	no	no	no
YBL079W::chr2_1	YBL079W	NUP170	0.730841	-1.50432	0.0515153	0.992499	no	no	no	no
YPL015C::chr16_3	YPL015C	HST2	0.730503	1.08325	0.0515969	0.122265	no	yes	no	yes
YNL224C::chr14_2	YNL224C	SQS1	0.728875	0.561064	0.0519901	0.33068	no	no	no	no
YJL168C::chr10_1	YJL168C	SET2	0.727586	2.06978	0.0523034	0.00562611	no	yes	no	yes
YER151C::chr00_5	YER151C	UBP3	0.727283	0.983302	0.052377	0.152719	no	no	no	no
YNL125C::chr00_16b	YNL125C	ESBP6	0.724837	0.419921	0.0529761	0.404435	no	no	no	no
YJR145C::chr00_12	YJR145C	RPS4A	0.724522	0.23095	0.0530538	0.508273	no	no	no	no
YHR125W::chr8_2	YHR125W	YHR125W	0.72293	0.657871	0.053447	0.283467	no	no	no	no
YLR165C::chr12_3	YLR165C	PUS5	0.722592	-0.261061	0.0535308	0.759442	yes	no	yes	no
YHR115C::chr8_2	YHR115C	DMA1	0.720594	1.89649	0.054028	0.010897	no	no	no	no
YHR193C::chr00_8	YHR193C	EGD2	0.719144	0.719144	0.0543913	0.255356	yes	yes	yes	yes
YIL077C::chr9_1	YIL077C	YIL077C	0.718167	2.21976	0.0546372	0.00304209	no	no	no	no
YNR075W::chr00_6	YNR075W	COS10	0.71777	0.614203	0.0547374	0.304365	no	no	no	no
YJR035W::chr00_13	YJR035W	RAD26	0.715974	0.70567	0.0551924	0.261411	yes	no	yes	no
YBR009C::chr2_2	YBR009C	HHF1	0.714666	1.94132	0.0555254	0.00923026	no	no	no	no
YFL027C::chr6_1	YFL027C	GYP8	0.714239	0.201868	0.0556344	0.524382	no	no	no	no
YBR019C::chr2_2	YBR019C	GAL10	0.71261	0.856591	0.0560523	0.198012	no	no	no	no
YJL210W::chr10_1	YJL210W	PEX2	0.712335	0.342347	0.0561231	0.446672	no	no	no	no
YOR024W::chr15_1	YOR024W	YOR024W	0.710317	1.61541	0.0566447	0.0284998	no	yes	no	yes
YJL176C::chr10_1	YJL176C	SWI3	0.709371	0.709371	0.0568904	0.25974	yes	yes	yes	yes
YNL179C::chr14_2	YNL179C	YNL179C	0.70937	1.018	0.0568906	0.141621	no	yes	no	yes
YOR091W::chr15_1	YOR091W	TMA46	0.70835	1.26719	0.0571566	0.0778955	no	no	no	no
YDR506C::chr4_8	YDR506C	GMC1	0.707647	-0.25764	0.0573406	0.75796	no	no	no	no
YMR135W-A::chr00_11	YMR135W-A	YMR135W-A	0.707095	0.49461	0.0574852	0.36479	no	no	no	no
YLR133W::chr12_3	YLR133W	CKI1	0.70683	1.14729	0.0575546	0.105149	no	no	no	no
YJL024C::chr00_13	YJL024C	APS3	0.706617	0.546785	0.0576107	0.337903	no	no	no	no
YDR388W::chr4_7	YDR388W	RVS167	0.706158	1.55868	0.0577313	0.0340405	no	yes	no	yes
YFR001W::chr6_1	YFR001W	LOC1	0.70599	-0.510686	0.0577758	0.853468	no	no	no	no
YLR402W::chr12_5	YLR402W	YLR402W	0.705885	0.940341	0.0578035	0.167238	no	no	no	no
YPL006W::chr16_3	YPL006W	NCR1	0.705272	0.705272	0.057965	0.26159	yes	yes	yes	yes
YAR031W::chr1_1	YAR031W	PRM9	0.704606	0.791895	0.0581412	0.223976	no	no	no	no
YML101C::chr00_9	YML101C	CUE4	0.703348	1.79642	0.0584749	0.015586	no	yes	no	yes
YLR113W::chr12_2	YLR113W	HOG1	0.703332	0.828769	0.0584793	0.208947	no	yes	no	yes
YJL207C::chr10_1	YJL207C	LAA1	0.703075	0.799383	0.0585476	0.220875	no	no	no	no
YPL086C::chr16_3	YPL086C	ELP3	0.702381	1.04245	0.0587326	0.134137	no	yes	no	yes
YKL129C::chr11_2	YKL129C	MYO3	0.702155	0.708392	0.058793	0.260182	no	no	no	no
YMR184W::chr13_4	YMR184W	ADD37	0.701213	0.999386	0.0590451	0.147505	no	no	no	no
YEL006W::chr5_2	YEL006W	YEA6	0.699426	0.537708	0.0595253	0.342526	no	no	no	no
YER053C::chr5_3	YER053C	PIC2	0.697473	0.845617	0.0600538	0.202283	no	no	no	no
YGL227W::chr7_3	YGL227W	VID30	0.696282	-0.246349	0.0603779	0.753032	no	no	no	no
YIL158W::chr9_2	YIL158W	AIM20	0.695957	0.421553	0.0604666	0.403556	no	no	no	no
YLR250W::chr12_4	YLR250W	SSP120	0.695087	0.521923	0.0607045	0.350622	no	no	no	no
YLR216C::chr12_3	YLR216C	CPR6	0.69478	0.69478	0.0607887	0.266357	yes	yes	yes	yes
YNR004W::chr14_4	YNR004W	SWM2	0.69402	0.125047	0.0609972	0.566675	no	no	no	no
YGL143C::chr7_2	YGL143C	MRF1	0.693866	1.63017	0.0610396	0.0271883	no	yes	no	yes
YLR386W::chr12_5	YLR386W	VAC14	0.693759	1.38581	0.061069	0.0565719	no	no	no	no
YBR071W::chr2_2	YBR071W	YBR071W	0.693083	0.424431	0.0612554	0.402009	no	no	no	no
YER024W::chr5_3	YER024W	YAT2	0.692856	0.55299	0.061318	0.334757	no	no	no	no
YNL325C::chr14_1	YNL325C	FIG4	0.692555	1.71552	0.0614011	0.0205542	no	no	no	no
YFR016C::chr6_1	YFR016C	YFR016C	0.692063	0.989065	0.0615372	0.150837	no	yes	no	yes
YMR246W::chr13_5	YMR246W	FAA4	0.692023	1.09211	0.0615482	0.119786	no	no	no	no
YIR016W::chr9_2	YIR016W	YIR016W	0.691637	0.422203	0.061655	0.403207	no	no	no	no
YKR074W::chr00_3	YKR074W	AIM29	0.691434	0.264603	0.0617112	0.489616	no	no	no	no
YMR291W::chr13_5	YMR291W	TDA1	0.691379	0.84219	0.0617268	0.203628	no	no	no	no
YCR094W::chr00_2	YCR094W	CDC50	0.690546	1.52738	0.061958	0.0374581	no	no	no	no
YML095C-A::chr00_9	YML094C-A	YML094C-A	0.689803	2.67712	0.0621651	0.000363986	no	yes	no	yes
YAL037W::chr1_1	YAL037W	YAL037W	0.688867	0.905846	0.0624266	0.17952	no	no	no	no
YNL326C::chr14_1	YNL326C	PFA3	0.688233	1.22597	0.0626043	0.086586	no	no	no	no
YHR155W::chr8_3	YHR155W	YSP1	0.687872	0.845095	0.0627057	0.202488	no	no	no	no
YER041W::chr5_3	YER041W	YEN1	0.684139	1.26507	0.063761	0.0783251	no	no	no	no
YGL019W::chr7_1	YGL019W	CKB1	0.68387	1.06163	0.0638375	0.12846	no	yes	no	yes
YBL019W::chr2_1	YBL019W	APN2	0.681772	0.0818148	0.0644372	0.590176	no	no	no	no
YGR122W::chr7_4	YGR122W	YGR122W	0.68067	0.68067	0.064754	0.272836	yes	yes	yes	yes
YLR096W::chr12_2	YLR096W	KIN2	0.679551	0.759978	0.0650771	0.237466	no	yes	no	yes
YOR307C::chr15_4	YOR307C	SLY41	0.678778	0.774283	0.0653006	0.231365	no	no	no	no
YER139C::chr00_5	YER139C	RTR1	0.678079	0.442247	0.0655036	0.392461	no	no	no	no
YBR131W::chr00_16a	YBR131W	CCZ1	0.677121	0.677121	0.0657824	0.274477	yes	yes	yes	yes
YOR304W::chr15_4	YOR304W	ISW2	0.676778	0.225813	0.0658825	0.51112	no	no	no	no
YGR019W::chr7_3	YGR019W	UGA1	0.676715	0.916082	0.065901	0.175818	no	no	no	no
YLR073C::chr12_2	YLR073C	RFU1	0.676192	0.0526207	0.0660538	0.60587	no	no	no	no
YBR075W::chr2_2	YBR074W	YBR074W	0.67185	0.558371	0.0673331	0.332037	no	no	no	no
YBL082C::chr2_1	YBL082C	ALG3	0.670433	-1.14677	0.0677548	0.973531	no	no	no	no
YPL262W::chr16_1	YPL262W	FUM1	0.670359	-0.418633	0.0677768	0.822125	no	no	no	no
YCR065W::chr00_1	YCR065W	HCM1	0.669515	2.24052	0.0680288	0.00278513	no	no	no	no
YMR312W::chr00_8	YMR312W	ELP6	0.668665	0.672889	0.0682838	0.276442	no	no	no	no
YPL197C::chr16_1	YPL197C	YPL197C	0.667708	0.580759	0.0685713	0.32082	no	no	no	no
YMR175W::chr00_4	YMR175W	SIP18	0.667702	1.09792	0.068573	0.118181	no	no	no	no
YBL102W::chr2_2	YBL102W	SFT2	0.66713	1.23932	0.0687456	0.0836943	no	no	no	no
YDR439W::chr4_8	YDR439W	LRS4	0.667119	2.01936	0.0687487	0.00685645	no	no	no	no
YOR045W::chr15_1	YOR045W	TOM6	0.666716	-0.174854	0.0688703	0.720626	no	no	no	no
YIL039W::chr9_1	YIL039W	TED1	0.666537	1.09058	0.0689246	0.120211	no	no	no	no
YBL060W::chr2_1	YBL060W	YEL1	0.666067	0.522106	0.0690665	0.350528	no	no	no	no
YKL069W::chr11_1	YKL069W	YKL069W	0.666067	0.9543	0.0690665	0.162426	no	yes	no	yes
YLR420W::chr12_3	YLR420W	URA4	0.665111	0.243177	0.0693565	0.501494	no	no	no	no
YPL056C::chr16_3	YPL056C	LCL1	0.665015	-0.155811	0.0693858	0.711659	no	no	no	no
YMR088C::chr00_6	YMR088C	VBA1	0.664805	2.06951	0.0694496	0.00563199	no	no	no	no
YER033C::chr5_3	YER033C	ZRG8	0.664082	0.453622	0.0696697	0.386398	no	no	no	no
YBR278W::chr00_1	YBR278W	DPB3	0.6637	1.05786	0.0697859	0.129565	no	no	no	no
YHL029C::chr8_1	YHL029C	OCA5	0.663673	1.2454	0.0697943	0.0824015	no	yes	no	yes
YMR262W::chr13_5	YMR262W	YMR262W	0.662837	0.238946	0.0700498	0.50384	yes	no	yes	no
YOL105C::chr00_6	YOL105C	WSC3	0.662747	1.3583	0.0700773	0.0610532	no	yes	no	yes
YGL007W::chr7_1	YGL007W	BRP1	0.662286	-2.47622	0.0702187	0.999923	yes	no	yes	no
YLR064W::chr12_2	YLR064W	PER33	0.662286	0.662286	0.0702187	0.281393	yes	yes	yes	yes
YOR137C::chr15_2	YOR137C	SIA1	0.661538	0.417136	0.0704483	0.405935	no	no	no	no
YMR118C::chr00_15	YMR118C	SHH3	0.661414	0.581582	0.0704864	0.32041	no	no	no	no
YBR260C::chr2_4	YBR260C	RGD1	0.660009	2.15688	0.0709193	0.00395588	no	no	no	no
YER115C::chr00_5	YER115C	SPR6	0.65974	0.193887	0.0710026	0.528797	no	no	no	no
YMR304W::chr13_5	YMR304W	UBP15	0.659314	1.77091	0.0711343	0.0170277	no	yes	no	yes
YDR348C::chr4_7	YDR348C	PAL1	0.659235	1.06747	0.0711587	0.126767	no	no	no	no
YGL258W::chr7_3	YGL258W	VEL1	0.65923	-0.231773	0.0711603	0.746593	no	no	no	no
YNL198C::chr14_2	YNL198C	YNL198C	0.659201	0.822015	0.0711694	0.211655	no	no	no	no
YKL162C-A::chr00_3	YKL162C-A	YKL162C-A	0.658872	0.668181	0.0712713	0.278635	no	no	no	no
YNL299W::chr14_1	YNL299W	TRF5	0.658648	0.153534	0.0713408	0.551055	no	no	no	no
YOL089C::chr00_6	YOL089C	HAL9	0.658308	1.79605	0.0714465	0.0156059	no	yes	no	yes
YDL198C::chr4_3	YDL198C	GGC1	0.657257	-0.254835	0.0717735	0.756741	no	no	no	no
YIL034C::chr9_1	YIL034C	CAP2	0.656888	0.00554801	0.0718886	0.630806	no	no	no	no
YDR056C::chr4_4	YDR056C	YDR056C	0.656029	0.432362	0.0721572	0.39775	no	no	no	no
YCR031C::chr00_1	YCR031C	RPS14A	0.655857	0.351217	0.072211	0.441802	no	no	no	no
YLR381W::chr12_5	YLR381W	CTF3	0.655731	0.291156	0.0722505	0.47491	no	no	no	no
YML073C::chr00_18	YML073C	RPL6A	0.655321	1.01562	0.072379	0.142366	no	no	no	no
YLR149C::chr12_3	YLR149C	YLR149C	0.654593	-0.658828	0.0726079	0.895678	no	no	no	no
YGR223C::chr00_2	YGR223C	HSV2	0.653461	-1.28976	0.0729645	0.983584	no	no	no	no
YPL041C::chr16_3	YPL041C	YPL041C	0.653167	0.229024	0.0730575	0.50934	no	no	no	no
YGR093W::chr00_14	YGR093W	YGR093W	0.652852	-0.358833	0.0731572	0.799654	no	no	no	no
YOR108W::chr15_2	YOR108W	LEU9	0.65203	0.65203	0.0734175	0.286222	yes	yes	yes	yes
YDL083C::chr4_1	YDL083C	RPS16B	0.651638	1.16318	0.0735418	0.101186	no	no	no	no
YJR038C::chr00_13	YJR038C	YJR038C	0.650784	1.81009	0.0738138	0.0148575	no	no	no	no
YDR319C::chr4_6	YDR319C	YDR319C	0.649976	0.739597	0.0740713	0.246308	no	no	no	no
YAL043C-A::chr1_1	YAL042C-A	YAL042C-A	0.649713	0.0981123	0.0741555	0.58135	no	no	no	no
YER067W::chr5_3	YER067W	RGI1	0.648248	0.725477	0.074625	0.252536	no	no	no	no
YOL108C::chr00_6	YOL108C	INO4	0.648096	0.265706	0.0746738	0.489005	no	no	no	no
YOL107W::chr00_6	YOL107W	YOL107W	0.647938	0.849079	0.0747247	0.20093	no	no	no	no
YER061C::chr5_3	YER061C	CEM1	0.647368	-0.462336	0.0749081	0.837499	no	no	no	no
YFR024C-A::chr6_1	YFR024C-A	LSB3	0.647084	1.25019	0.0749994	0.0813952	no	yes	no	yes
YPR047W::chr16_4	YPR047W	MSF1	0.646802	0.861948	0.0750904	0.195946	no	no	no	no
YML008C::chr13_2	YML008C	ERG6	0.646754	0.441589	0.075106	0.392812	no	no	no	no
YLR171W::chr12_3	YLR171W	YLR171W	0.646232	1.27388	0.0752746	0.0765494	no	yes	no	yes
YER042W::chr5_3	YER042W	MXR1	0.645603	0.877765	0.0754782	0.189925	no	no	no	no
YNL292W::chr14_1	YNL292W	PUS4	0.645026	-0.901236	0.0756654	0.944553	no	no	no	no
YFL034W::chr6_1	YFL034W	YFL034W	0.64441	0.466705	0.0758657	0.379459	no	no	no	no
YBR008C::chr2_2	YBR008C	FLR1	0.643896	1.30563	0.0760329	0.0704037	no	no	no	no
YNL085W::chr00_16b	YNL085W	MKT1	0.643872	0.453692	0.0760409	0.386361	no	no	no	no
YFR018C::chr6_1	YFR018C	YFR018C	0.643395	0.745919	0.0761965	0.243547	no	no	no	no
YGR250C::chr00_14	YGR250C	YGR250C	0.643053	-1.41739	0.076308	0.989598	no	no	no	no
YLR110C::chr00_15	YLR110C	CCW12	0.64288	0.639919	0.0763645	0.291974	no	no	no	no
YGL163C::chr7_2	YGL163C	RAD54	0.641963	1.00684	0.0766648	0.145129	no	no	no	no
YPL013C::chr16_3	YPL013C	MRPS16	0.641762	-0.969253	0.0767309	0.954363	no	no	no	no
YML029W::chr13_2	YML029W	USA1	0.641276	0.185607	0.0768902	0.533374	no	no	no	no
YIL133C::chr9_2	YIL133C	RPL16A	0.641123	1.31045	0.0769407	0.0695039	no	no	no	no
YPL001W::chr16_3	YPL001W	HAT1	0.640127	0.610243	0.0772685	0.306294	no	no	no	no
YLR448W::chr00_4	YLR448W	RPL6B	0.640032	1.67229	0.0772999	0.0237197	no	no	no	no
YDR026C::chr4_3	YDR026C	NSI1	0.639839	0.487553	0.0773636	0.368483	no	no	no	no
YDR115W::chr4_4	YDR115W	YDR115W	0.639579	-0.684244	0.0774496	0.90193	no	no	no	no
YPL249C::chr16_1	YPL249C	GYP5	0.638989	0.342053	0.0776448	0.446833	no	no	no	no
YDR124W::chr4_4	YDR124W	YDR124W	0.638451	0.578701	0.077823	0.321844	no	no	no	no
YKL199C::chr11_3	YKL198C	PTK1	0.638376	-0.261656	0.0778479	0.759699	no	no	no	no
YAR043C::chr1_1	deleted	YAR043C	0.638011	1.44401	0.077969	0.0479457	no	no	no	no
YAL004W::chr1_1	YAL004W	YAL004W	0.63638	0.192795	0.0785122	0.529401	no	no	no	no
YFL013W-A::chr00_15	YFL013W-A	YFL013W-A	0.636029	0.669997	0.0786295	0.277788	no	yes	no	yes
YHR207C::chr8_3	YHR207C	SET5	0.634224	2.1979	0.0792345	0.00333562	no	yes	no	yes
YPL033C::chr16_3	YPL033C	SRL4	0.63377	1.60611	0.0793871	0.0293531	no	yes	no	yes
YOR182C::chr15_2	YOR182C	RPS30B	0.633427	0.577892	0.0795029	0.322247	no	no	no	no
YBL015W::chr2_1	YBL015W	ACH1	0.632733	2.21289	0.079737	0.00313173	no	no	no	no
YLR104W::chr12_2	YLR104W	LCL2	0.631919	0.980452	0.0800123	0.153656	no	yes	no	yes
YIL095W::chr9_1	YIL095W	PRK1	0.631091	0.860594	0.0802931	0.196467	no	no	no	no
YPL005W::chr16_3	YPL005W	AEP3	0.630255	0.763502	0.0805773	0.235955	no	no	no	no
YOR141C::chr15_2	YOR141C	ARP8	0.630203	1.46064	0.080595	0.0456838	no	no	no	no
YLR207W::chr12_3	YLR207W	HRD3	0.630199	1.03592	0.0805964	0.136109	no	no	no	no
YMR225C::chr13_4	YMR225C	MRPL44	0.630171	0.630171	0.0806062	0.296644	yes	yes	yes	yes
YGR205W::chr7_5	YGR205W	TDA10	0.630114	0.310866	0.0806255	0.464014	no	no	no	no
YDR101C::chr4_4	YDR101C	ARX1	0.630087	1.8863	0.0806347	0.0113104	no	no	no	no
YDR426C::chr4_7	YDR426C	YDR426C	0.62969	0.00483703	0.08077	0.631179	no	no	no	no
YMR278W::chr13_5	YMR278W	PGM3	0.629223	0.43385	0.0809296	0.396953	no	no	no	no
YLR120C::chr12_2	YLR120C	YPS1	0.628835	0.854136	0.0810622	0.198963	no	yes	no	yes
YBR106W::chr2_3	YBR106W	PHO88	0.6288	3.66014	0.081074	1.04267e-06	no	yes	no	yes
YPL054W::chr16_3	YPL054W	LEE1	0.628774	1.26681	0.0810828	0.0779713	no	yes	no	yes
YPL073C::chr16_3	YPL073C	YPL073C	0.628593	0.640878	0.081145	0.291517	no	no	no	no
YLR304C::chr12_4	YLR304C	ACO1	0.627414	1.738	0.0815492	0.0190543	no	yes	no	yes
YOR213C::chr15_3	YOR213C	SAS5	0.626767	0.17975	0.0817719	0.536608	no	no	no	no
YDL081C::chr4_1	YDL081C	RPP1A	0.625759	-0.0092571	0.0821192	0.638542	no	no	no	no
YKR012C::chr11_3	YKR012C	YKR012C	0.62442	0.216389	0.082583	0.516342	no	no	no	no
YHR202W::chr8_3	YHR202W	YHR202W	0.623548	0.269719	0.0828857	0.486781	no	no	no	no
YOL033W::chr15_5	YOL033W	MSE1	0.623232	-1.08559	0.0829959	0.967872	no	no	no	no
YKL221W::chr11_3	YKL221W	MCH2	0.622195	2.21964	0.0833573	0.00304373	no	yes	no	yes
YBR258C::chr2_4	YBR258C	SHG1	0.621673	0.518947	0.0835398	0.352156	no	no	no	no
YBL065W::chr2_1	YBL065W	YBL065W	0.620722	1.43129	0.0838732	0.0497344	no	no	no	no
YGL243W::chr7_3	YGL243W	TAD1	0.619675	0.217251	0.0842414	0.515864	no	no	no	no
YDR174W::chr00_14	YDR174W	HMO1	0.618677	1.89348	0.0845933	0.0110178	no	no	no	no
YHR033W::chr8_1	YHR033W	YHR033W	0.618233	0.0448419	0.08475	0.610024	no	no	no	no
YOR031W::chr15_1	YOR031W	CRS5	0.617798	-0.262109	0.084904	0.759895	no	no	no	no
YBR210W::chr2_4	YBR210W	ERV15	0.617473	1.32546	0.0850191	0.0667611	no	no	no	no
YBL069W::chr2_1	YBL069W	AST1	0.61695	0.894788	0.0852049	0.183574	no	no	no	no
YBR025C::chr2_2	YBR025C	OLA1	0.616608	1.51385	0.0853265	0.0390202	no	no	no	no
YNL211C::chr14_2	YNL211C	YNL211C	0.6166	0.887142	0.0853291	0.18641	no	no	no	no
YJL148W::chr10_1	YJL148W	RPA34	0.615403	3.07247	0.0857556	4.27813e-05	no	no	no	yes
YLR194C::chr12_3	YLR194C	YLR194C	0.615314	0.62281	0.0857872	0.300192	no	yes	no	yes
YDL192W::chr4_3	YDL192W	ARF1	0.614976	0.788878	0.085908	0.225232	no	no	no	no
YNL170W::chr14_2	YNL170W	YNL170W	0.613612	-1.21587	0.0863964	0.978895	yes	no	yes	no
YDR403W::chr4_7	YDR403W	DIT1	0.613326	1.01431	0.086499	0.142774	no	no	no	no
YER087C-A::chr5_3	YER087C-A	YER087C-A	0.613182	1.27857	0.0865508	0.0756163	no	yes	no	yes
YBR251W::chr2_4	YBR251W	MRPS5	0.612253	-0.926601	0.0868851	0.94839	no	no	no	no
YMR179W::chr13_4	YMR179W	SPT21	0.611976	2.40839	0.0869847	0.00132636	no	yes	no	yes
YBR286W::chr00_1	YBR286W	APE3	0.611184	1.53339	0.0872711	0.0367818	no	yes	no	yes
YJR053W::chr00_13	YJR053W	BFA1	0.61109	1.13547	0.0873049	0.10817	no	no	no	no
YLR410W::chr12_5	YLR410W	VIP1	0.609843	1.09127	0.0877568	0.12002	no	yes	no	yes
YML118W::chr00_9	YML118W	NGL3	0.609109	-0.0679299	0.0880235	0.66862	no	no	no	no
YDR500C::chr00_17a	YDR500C	RPL37B	0.60883	0.994256	0.088125	0.149155	no	no	no	no
YHR013C::chr8_1	YHR013C	ARD1	0.608297	0.697076	0.0883194	0.26531	no	no	no	no
YLR332W::chr12_5	YLR332W	MID2	0.608217	0.991265	0.0883486	0.150123	no	no	no	no
YDR261C::chr4_6	YDR261C	EXG2	0.607975	0.450871	0.0884369	0.387862	yes	no	yes	no
YGR193C::chr7_5	YGR193C	PDX1	0.607975	-0.10755	0.0884369	0.688346	yes	no	yes	no
YJR036C::chr00_13	YJR036C	HUL4	0.607294	0.921678	0.0886859	0.173814	no	yes	no	yes
YAL059W::chr1_1	YAL059W	ECM1	0.606932	1.12134	0.0888182	0.111863	no	no	no	no
YLR143W::chr12_3	YLR143W	YLR143W	0.606733	1.04521	0.0888911	0.133311	no	yes	no	yes
YER116C::chr00_5	YER116C	SLX8	0.606522	0.606522	0.0889684	0.308111	yes	yes	yes	yes
YFL019C::chr00_15	YFL019C	YFL019C	0.606369	-0.0947348	0.0890246	0.682021	no	no	no	no
YOR139C::chr15_2	YOR139C	YOR139C	0.606297	2.36745	0.0890511	0.00159683	no	no	no	no
YLR280C::chr12_4	YLR280C	YLR280C	0.605807	0.160743	0.0892311	0.547088	no	no	no	no
YDR495C::chr4_8	YDR495C	VPS3	0.605692	2.40964	0.0892732	0.00131879	no	no	no	no
YML061C::chr13_1b	YML061C	PIF1	0.605103	0.0461882	0.0894902	0.609306	no	no	no	no
YBL012C::chr2_1	YBL012C	YBL012C	0.604841	0.607486	0.0895868	0.30764	no	no	no	no
YGR260W::chr00_3	YGR260W	TNA1	0.604833	0.148928	0.0895896	0.553587	no	no	no	no
YOL106W::chr00_6	YOL106W	YOL106W	0.604667	0.481337	0.0896509	0.371745	no	no	no	no
YMR244W::chr13_5	YMR244W	YMR244W	0.604667	0.421464	0.0896509	0.403605	no	no	no	no
YER039C-A::chr00_2	YER039C-A	YER039C-A	0.604581	0.441801	0.0896826	0.392699	no	no	no	no
YLR219W::chr12_3	YLR219W	MSC3	0.604565	0.838453	0.0896885	0.205101	no	no	no	no
YKR092C::chr00_4	YKR092C	SRP40	0.604424	1.23755	0.0897406	0.0840728	no	no	no	no
YNL143C::chr14_3	YNL143C	YNL143C	0.604324	1.0507	0.0897774	0.131674	no	yes	no	yes
YJL046W::chr10_2	YJL046W	AIM22	0.604121	-0.952362	0.0898523	0.952068	no	no	no	no
YBR021W::chr2_2	YBR021W	FUR4	0.604024	1.50806	0.0898881	0.0397043	no	no	no	no
YGR004W::chr7_3	YGR004W	PEX31	0.603356	1.16269	0.0901352	0.101305	no	no	no	no
YIL072W::chr9_1	YIL072W	HOP1	0.602409	-0.232994	0.0904867	0.747136	no	no	no	no
YHR030C::chr8_1	YHR030C	SLT2	0.601572	0.980105	0.0907981	0.15377	no	yes	no	yes
YGR204W::chr00_10	YGR204W	ADE3	0.601414	0.329974	0.0908567	0.453477	no	no	no	no
YOR355W::chr15_4	YOR355W	GDS1	0.601045	1.729	0.0909945	0.0196433	no	no	no	no
YDR058C::chr00_14	YDR058C	TGL2	0.6005	0.6005	0.0911978	0.311062	yes	yes	yes	yes
YCR068W::chr00_1	YCR068W	ATG15	0.600029	1.71626	0.0913739	0.0205033	no	no	no	no
YBR031W::chr2_2	YBR031W	RPL4A	0.599687	1.58515	0.0915019	0.0313537	no	no	no	no
YOR129C::chr15_2	YOR129C	AFI1	0.598504	0.783978	0.0919456	0.227281	no	no	no	no
YDR338C::chr4_7	YDR338C	YDR338C	0.597741	1.97757	0.0922329	0.00805042	no	yes	no	yes
YLL033W::chr12_1	YLL033W	IRC19	0.597596	0.242737	0.0922875	0.501738	no	no	no	no
YNL099C::chr00_16b	YNL099C	OCA1	0.597401	2.08459	0.0923608	0.00530406	no	yes	no	yes
YDR417C::chr00_17a/chr00_18	YDR417C	YDR417C	0.597389	0.990589	0.0923652	0.150342	no	no	no	no
YJR040W::chr00_13	YJR040W	GEF1	0.597141	0.299353	0.0924592	0.470376	no	no	no	no
YBR037C::chr2_2	YBR037C	SCO1	0.59709	-1.02588	0.0924781	0.961421	no	no	no	no
YDR254W::chr4_6	YDR254W	CHL4	0.595678	0.588166	0.0930123	0.317143	no	no	no	no
YER007C-A::chr5_2	YER007C-A	TMA20	0.595415	-0.262173	0.0931122	0.759923	no	no	no	no
YOR367W::chr15_4	YOR367W	SCP1	0.594711	0.527615	0.0933795	0.347695	no	no	no	no
YKR048C::chr11_3	YKR048C	NAP1	0.594613	0.150968	0.0934168	0.552466	no	no	no	no
YER164W::chr00_5	YER164W	CHD1	0.594224	0.115138	0.0935647	0.572086	no	no	no	no
YIR035C::chr00_3	YIR035C	YIR035C	0.593586	0.988421	0.093808	0.151047	no	no	no	no
YAL012W::chr00_12	YAL012W	CYS3	0.592986	0.592986	0.094037	0.314761	yes	yes	yes	yes
YOR190W::chr15_2	YOR190W	SPR1	0.592717	-1.259	0.0941398	0.981753	no	no	no	no
YPL226W::chr16_1	YPL226W	NEW1	0.591525	-0.270992	0.0945966	0.763717	no	no	no	no
YIR020C::chr00_3	YIR020C	YIR020C	0.59151	0.984138	0.094602	0.152445	no	no	no	no
YHR139C::chr8_2	YHR139C	SPS100	0.59137	0.711066	0.094656	0.258977	no	no	no	no
YKL007W::chr11_1	YKL007W	CAP1	0.591328	0.577651	0.0946722	0.322368	no	no	no	no
YDR287W::chr4_6	YDR287W	INM2	0.590948	-0.123598	0.0948181	0.696189	no	no	no	no
YBR082C::chr2_3	YBR082C	UBC4	0.590745	1.48143	0.0948963	0.0429796	no	yes	no	yes
YML016C::chr13_2	YML016C	PPZ1	0.590205	-2.78782	0.095104	0.999988	no	no	no	no
YGL209W::chr7_3	YGL209W	MIG2	0.589884	1.11204	0.0952278	0.114343	no	no	no	no
YGR157W::chr7_5	YGR157W	CHO2	0.589688	0.37527	0.0953036	0.428643	no	no	no	no
YOR293W::chr15_4	YOR293W	RPS10A	0.589214	0.589214	0.0954865	0.316625	yes	yes	yes	yes
YLR024C::chr12_1	YLR024C	UBR2	0.587797	-1.54351	0.0960353	0.993555	no	no	no	no
YJR084W::chr00_12	YJR084W	YJR084W	0.586228	0.107968	0.0966459	0.575993	no	no	no	no
YDR297W::chr4_6	YDR297W	SUR2	0.585129	0.144978	0.0970749	0.555756	no	no	no	no
YBL051C::chr2_1	YBL051C	PIN4	0.585083	0.68067	0.0970929	0.272836	no	yes	no	yes
YMR054W::chr00_5	YMR054W	STV1	0.584634	0.396212	0.0972685	0.41725	no	no	no	no
YGR288W::chr00_3	YGR288W	MAL13	0.58349	0.658586	0.0977176	0.28313	no	no	no	no
YMR196W::chr13_4	YMR196W	YMR196W	0.583018	0.55138	0.0979034	0.335572	no	no	no	no
YBL005W::chr2_1	YBL005W	PDR3	0.581953	0.247412	0.0983231	0.499146	no	no	no	no
YBL072C::chr2_1	YBL072C	RPS8A	0.581319	-1.14164	0.0985739	0.97309	no	no	no	no
YDR379W::chr4_7	YDR379W	RGA2	0.5809	0.806201	0.0987396	0.218074	no	yes	no	yes
YBR218C::chr2_4	YBR218C	PYC2	0.580232	-0.154295	0.0990043	0.71094	no	no	no	no
YKL032C::chr11_1	YKL032C	IXR1	0.578891	-0.435895	0.0995378	0.828304	no	no	no	no
YMR293C::chr13_5	YMR293C	HER2	0.577812	-1.20529	0.0999685	0.978139	no	no	no	no
YIL112W::chr9_2	YIL112W	HOS4	0.576999	0.844783	0.100294	0.20261	no	no	no	no
YIL103W::chr9_2	YIL103W	DPH1	0.576346	0.701783	0.100556	0.263171	no	yes	no	yes
YHL021C::chr8_1	YHL021C	AIM17	0.576306	1.09201	0.100572	0.119814	no	no	no	no
YIL124W::chr9_2	YIL124W	AYR1	0.57587	-0.369733	0.100747	0.803873	no	no	no	no
YPR188C::chr16_5	YPR188C	MLC2	0.575567	0.859784	0.100869	0.196779	no	no	no	no
YLR201C::chr12_3	YLR201C	COQ9	0.5746	-1.18201	0.101258	0.976394	no	no	no	no
YDL233W::chr4_3	YDL233W	YDL233W	0.57446	0.918466	0.101315	0.174962	no	yes	no	yes
YDR314C::chr4_6	YDR314C	RAD34	0.574093	0.3997	0.101463	0.415358	no	no	no	no
YOR087W::chr15_1	YOR087W	YVC1	0.573601	1.09382	0.101662	0.119312	no	no	no	no
YDR447C::chr4_8	YDR447C	RPS17B	0.57276	0.803242	0.102002	0.219287	no	no	no	no
YLR454W::chr00_4	YLR454W	FMP27	0.572731	0.923616	0.102014	0.173124	no	no	no	no
YIL107C::chr9_2	YIL107C	PFK26	0.572726	1.7625	0.102016	0.0175272	no	no	no	no
YBR024W::chr2_2	YBR024W	SCO2	0.57269	0.835516	0.102031	0.206263	no	no	no	no
YJL154C::chr10_1	YJL154C	VPS35	0.571559	-0.0830607	0.102491	0.676212	no	no	no	no
YNL120C::chr00_16b	YNL120C	YNL120C	0.570859	1.24301	0.102776	0.0829094	no	yes	no	yes
YER020W::chr5_3	YER020W	GPA2	0.570641	1.95138	0.102865	0.00888879	no	no	no	no
YOL125W::chr00_15	YOL125W	TRM13	0.57024	0.535348	0.103028	0.343732	no	no	no	no
YPL168W::chr16_2	YPL168W	YPL168W	0.570021	1.1219	0.103118	0.111714	no	no	no	no
YMR267W::chr13_5	YMR267W	PPA2	0.569572	-1.20823	0.103302	0.978352	no	no	no	no
YMR174C::chr00_4	YMR174C	PAI3	0.567887	0.746495	0.103993	0.243296	no	yes	no	yes
YER046W-A::chr5_3	YER046W-A	YER046W-A	0.566374	0.520527	0.104617	0.351342	yes	no	yes	no
YJL181W::chr10_1	YJL181W	YJL181W	0.566178	0.455644	0.104698	0.385323	no	no	no	no
YDR540C::chr00_2	YDR540C	IRC4	0.565922	-0.639001	0.104804	0.890605	no	no	no	no
YGR022C::chr7_3/chr00_12	YGR022C	YGR022C	0.56559	0.825912	0.104941	0.21009	no	no	no	no
YMR163C::chr13_4	YMR163C	INP2	0.565445	0.362023	0.105001	0.435881	no	no	no	no
YOR135C::chr15_2	YOR135C	IRC14	0.564941	1.09665	0.10521	0.118529	no	no	no	no
YEL065W::chr5_2	YEL065W	SIT1	0.563299	0.39844	0.105893	0.416041	no	no	no	no
YOR053W::chr15_1	YOR053W	YOR053W	0.562826	1.71731	0.10609	0.0204312	no	no	no	no
YGL255W::chr7_3	YGL255W	ZRT1	0.562532	-0.395472	0.106213	0.813617	yes	no	yes	no
YFR032C::chr00_2	YFR032C	RRT5	0.561967	0.511778	0.106449	0.355862	no	no	no	no
YDL091C::chr4_1	YDL091C	UBX3	0.560421	-0.00389076	0.107097	0.635745	no	no	no	no
YDR317W::chr4_6	YDR317W	HIM1	0.560134	1.31099	0.107218	0.0694034	no	yes	no	yes
YPR116W::chr16_5	YPR116W	RRG8	0.559994	-0.51617	0.107277	0.855211	no	no	no	no
YER068W::chr5_3	YER068W	MOT2	0.559802	0.883701	0.107357	0.187695	no	yes	no	yes
YKL025C::chr11_1	YKL025C	PAN3	0.558787	-0.127844	0.107785	0.698249	no	no	no	no
YLL018C-A::chr00_4	YLL018C-A	COX19	0.558008	-1.26326	0.108115	0.982017	no	no	no	no
YJL037W::chr10_2	YJL037W	IRC18	0.557958	0.378841	0.108135	0.426696	no	no	no	no
YGR263C::chr00_3	YGR263C	SAY1	0.557133	0.138611	0.108485	0.559249	no	no	no	no
YBL107C::chr2_2	YBL107C	YBL107C	0.556993	0.518196	0.108544	0.352544	no	no	no	no
YPL032C::chr16_3	YPL032C	SVL3	0.556742	0.155659	0.108651	0.549886	no	no	no	no
YLL053C::chr12_1	YLL053C	YLL053C	0.556537	0.626789	0.108738	0.298272	no	no	no	no
YLR367W::chr12_5	YLR367W	RPS22B	0.556524	0.615227	0.108744	0.303867	no	no	no	no
YBR299W::chr00_17a	YBR299W	MAL32	0.554817	-0.0452303	0.109471	0.657099	yes	no	yes	no
YOL114C::chr00_6	YOL114C	YOL114C	0.553622	1.29487	0.109982	0.0724414	no	yes	no	yes
YMR104C::chr00_15	YMR104C	YPK2	0.553173	1.02301	0.110174	0.140065	no	yes	no	yes
YHR028C::chr8_1	YHR028C	DAP2	0.553069	0.628613	0.110218	0.297393	no	no	no	no
YOL016C::chr00_8	YOL016C	CMK2	0.552099	0.864516	0.110635	0.194961	no	no	no	no
YBR189W::chr00_14	YBR189W	RPS9B	0.55059	1.27253	0.111285	0.0768187	no	no	no	no
YOL055C::chr15_5	YOL055C	THI20	0.55059	0.766673	0.111285	0.2346	no	yes	no	yes
YDR431W::chr4_7	YDR431W	YDR431W	0.549735	-0.248259	0.111655	0.753869	no	no	no	no
YIL002C::chr9_1	YIL002C	INP51	0.549714	1.00251	0.111665	0.146507	no	no	no	no
YDR074W::chr00_11	YDR074W	TPS2	0.549519	1.74467	0.111749	0.0186278	no	no	no	no
YMR021C::chr13_2	YMR021C	MAC1	0.549447	-1.00666	0.11178	0.959132	no	no	no	no
YJL027C::chr00_13	YJL027C	YJL027C	0.549224	-0.0536299	0.111877	0.66138	no	no	no	no
YNL316C::chr00_8	YNL316C	PHA2	0.547484	-0.144163	0.112633	0.706108	no	no	no	no
YDR161W::chr4_5	YDR161W	YDR161W	0.547461	0.965981	0.112643	0.158469	no	yes	no	yes
YDR244W::chr4_6	YDR244W	PEX5	0.547061	0.235139	0.112818	0.505951	yes	no	yes	no
YDR108W::chr4_4	YDR108W	TRS85	0.545581	0.937595	0.113464	0.168196	no	no	no	no
YOR295W::chr15_4	YOR295W	UAF30	0.545335	1.05344	0.113572	0.130863	no	yes	no	yes
YMR261C::chr13_5	YMR261C	TPS3	0.544322	0.909631	0.114016	0.178145	no	yes	no	yes
YDR405W::chr4_7	YDR405W	MRP20	0.543473	-1.03203	0.11439	0.96213	no	no	no	no
YEL054C::chr5_2	YEL054C	RPL12A	0.542863	-0.659349	0.114659	0.895809	no	no	no	no
YMR041C::chr13_2	YMR041C	ARA2	0.542546	0.281419	0.114799	0.4803	no	no	no	no
YPL074W::chr16_3	YPL074W	YTA6	0.542372	0.847362	0.114876	0.2016	no	no	no	no
YNL121C::chr00_16b	YNL121C	TOM70	0.541896	0.587512	0.115086	0.317467	no	no	no	no
YLR414C::chr12_5	YLR414C	PUN1	0.541572	-0.505494	0.11523	0.851806	no	no	no	no
YGL210W::chr7_3	YGL210W	YPT32	0.541319	0.417918	0.115342	0.405514	no	no	no	no
YKL002W::chr11_1	YKL002W	DID4	0.541277	0.727177	0.11536	0.251782	no	no	no	no
YLR190W::chr12_3	YLR190W	MMR1	0.540284	-0.0844015	0.115801	0.676882	no	no	no	no
YKR026C::chr11_3	YKR026C	GCN3	0.54021	0.0653088	0.115834	0.599069	no	no	no	no
YJL199C::chr10_1	YJL199C	MBB1	0.539969	1.09598	0.115941	0.118715	no	no	no	no
YDR312W::chr4_6	YDR312W	SSF2	0.539864	1.07787	0.115988	0.123785	no	yes	no	yes
YPR039W::chr16_4	YPR039W	YPR039W	0.539266	0.419841	0.116254	0.404478	no	no	no	no
YPL111W::chr16_2	YPL111W	CAR1	0.539095	0.224809	0.11633	0.511677	no	no	no	no
YBR107C::chr2_3	YBR107C	IML3	0.537904	0.598692	0.116862	0.31195	no	no	no	no
YBR043C::chr2_2	YBR043C	QDR3	0.536259	1.87658	0.117599	0.0117174	no	no	no	no
YLR380W::chr12_5	YLR380W	CSR1	0.536035	0.207681	0.1177	0.521164	no	no	no	no
YER130C::chr00_5	YER130C	YER130C	0.535765	-0.103948	0.117821	0.686574	no	no	no	no
YBL059W::chr2_1	YBL059W	YBL059W	0.534912	1.17456	0.118206	0.0984136	no	no	no	no
YOL082W::chr15_5	YOL082W	ATG19	0.534249	0.267853	0.118505	0.487815	no	no	no	no
YLR220W::chr12_3	YLR220W	CCC1	0.534138	0.553793	0.118555	0.33435	no	no	no	no
YPL161C::chr16_2	YPL161C	BEM4	0.534055	-1.3939	0.118592	0.988663	no	no	no	no
YPR159W::chr16_5	YPR159W	KRE6	0.533701	0.941186	0.118752	0.166944	no	yes	no	yes
YIL087C::chr9_1	YIL087C	AIM19	0.533617	0.594687	0.11879	0.313922	no	no	no	no
YBR013C::chr2_2	YBR013C	YBR013C	0.532836	0.559601	0.119144	0.331417	no	no	no	no
YDL202W::chr4_3	YDL202W	MRPL11	0.532371	-1.08046	0.119355	0.967355	no	no	no	no
YIL114C::chr9_2	YIL114C	POR2	0.532185	1.4004	0.11944	0.054302	no	no	no	no
YOL155C::chr00_17b	YOL155C	HPF1	0.531792	1.26311	0.119618	0.0787235	no	yes	no	yes
YDR055W::chr4_4	YDR055W	PST1	0.531526	0.957995	0.119739	0.161168	no	yes	no	yes
YKL074C::chr11_1	YKL074C	MUD2	0.530133	1.25071	0.120374	0.0812868	no	no	no	no
YPL199C::chr16_1	YPL199C	YPL199C	0.530062	0.16424	0.120406	0.545162	no	no	no	no
YCR024C::chr00_1	YCR024C	SLM5	0.529735	0.224141	0.120556	0.512046	no	no	no	no
YDR076W::chr4_4	YDR076W	RAD55	0.52891	-0.267105	0.120933	0.762049	no	no	no	no
YHR209W::chr8_3	YHR209W	CRG1	0.527874	0.699341	0.121409	0.264279	no	no	no	no
YJR115W::chr10_4	YJR115W	YJR115W	0.526993	0.508311	0.121814	0.357659	no	no	no	no
YDR425W::chr4_7	YDR425W	SNX41	0.526822	0.761872	0.121893	0.236653	no	no	no	no
YKL096W::chr11_2	YKL096W	CWP1	0.526516	0.458077	0.122034	0.384031	no	no	no	no
YLR261C::chr12_4	YLR261C	VPS63	0.526374	0.353837	0.1221	0.440365	no	no	no	no
YBR039W::chr2_2	YBR039W	ATP3	0.525978	-2.28512	0.122282	0.999782	no	no	no	no
YJL013C::chr00_13	YJL013C	MAD3	0.525504	1.06786	0.122501	0.126655	no	no	no	no
YLL017W::chr12_1	YLL017W	YLL017W	0.52548	1.15754	0.122513	0.10258	no	no	no	no
YJL193W::chr10_1	YJL193W	YJL193W	0.525331	0.990947	0.122581	0.150226	no	no	no	no
YAR018C::chr1_1	YAR018C	KIN3	0.523623	-0.0429718	0.123373	0.655945	no	no	no	no
YLR360W::chr12_5	YLR360W	VPS38	0.522512	2.63969	0.12389	0.000439235	no	no	no	yes
YAL034C::chr1_1	YAL034C	FUN19	0.521998	0.892104	0.12413	0.184567	no	no	no	no
YPL191C::chr16_1	YPL191C	YPL191C	0.521966	0.653223	0.124145	0.285658	no	no	no	no
YPL053C::chr16_3	YPL053C	KTR6	0.521146	0.611698	0.124528	0.305584	no	yes	no	yes
YLR377C::chr12_5	YLR377C	FBP1	0.520736	-0.464606	0.12472	0.838273	no	no	no	no
YFL006W::chr6_1	YFL007W	BLM10	0.520685	0.708753	0.124744	0.260019	no	yes	no	yes
YBL049W::chr2_1	YBL049W	MOH1	0.520417	0.0753363	0.124869	0.593672	no	no	no	no
YPL261C::chr16_1	YPL261C	YPL261C	0.52039	1.56458	0.124882	0.0334259	no	no	no	no
YDR363W-A::chr00_2	YDR363W-A	SEM1	0.520251	-0.124869	0.124947	0.696806	no	no	no	no
YPL118W::chr16_2	YPL118W	MRP51	0.519766	0.997663	0.125174	0.148058	no	no	no	no
YKR065C::chr11_3	YKR065C	PAM17	0.519718	0.588093	0.125197	0.31718	no	no	no	no
YOR165W::chr15_2	YOR165W	SEY1	0.51958	0.28566	0.125262	0.477951	yes	no	yes	no
YNL213C::chr14_2	YNL213C	RRG9	0.519577	-0.833353	0.125263	0.933173	no	no	no	no
YBR058C::chr2_2	YBR058C	UBP14	0.518791	1.19527	0.125633	0.0935141	no	no	no	no
YDR140W::chr4_4	YDR140W	MTQ2	0.518615	0.518615	0.125715	0.352328	yes	yes	yes	yes
YBR283C::chr00_1	YBR283C	SSH1	0.517897	0.948423	0.126054	0.164441	no	yes	no	yes
YGR235C::chr00_2	YGR235C	MOS2	0.51757	0.414191	0.126208	0.407523	no	no	no	no
YDR352W::chr4_7	YDR352W	YDR352W	0.516244	1.06163	0.126836	0.12846	no	yes	no	yes
YDR393W::chr4_7	YDR393W	SHE9	0.516111	0.0367417	0.126898	0.614336	no	no	no	no
YJL101C::chr00_15	YJL101C	GSH1	0.515611	0.515611	0.127135	0.353879	yes	yes	yes	yes
YMR137C::chr00_11	YMR137C	PSO2	0.515611	-0.188387	0.127135	0.726916	yes	no	yes	no
YPL270W::chr16_1	YPL270W	MDL2	0.515044	-0.431035	0.127404	0.826578	no	no	no	no
YIL138C::chr9_2	YIL138C	TPM2	0.51471	0.0917535	0.127563	0.584799	no	no	no	no
YGL216W::chr7_3	YGL216W	KIP3	0.513677	0.230871	0.128055	0.508316	no	no	no	no
YOR235W::chr15_3	YOR235W	IRC13	0.513651	1.43227	0.128068	0.0495955	no	no	no	no
YLL013C::chr12_1	YLL013C	PUF3	0.51347	0.882219	0.128154	0.188251	no	no	no	no
YMR138W::chr00_11	YMR138W	CIN4	0.513462	-0.981407	0.128158	0.955959	no	no	no	no
YBR030W::chr2_2	YBR030W	RKM3	0.511863	0.761128	0.128923	0.236972	no	no	no	no
YEL068C::chr5_2	YEL068C	YEL068C	0.511666	0.0214515	0.129017	0.622437	no	no	no	no
YOR315W::chr15_4	YOR315W	SFG1	0.511652	1.22157	0.129024	0.0875539	no	no	no	no
YBR176W::chr2_4	YBR176W	ECM31	0.51099	0.0452177	0.129341	0.609823	no	no	no	no
YDL200C::chr4_3	YDL200C	MGT1	0.510881	0.457162	0.129394	0.384517	no	no	no	no
YKL038W::chr11_1	YKL038W	RGT1	0.510701	-0.269128	0.12948	0.762918	no	no	no	no
YHR168W::chr00_8	YHR168W	MTG2	0.508966	-0.754198	0.130316	0.917712	no	no	no	no
YCR050C::chr00_1	YCR050C	YCR050C	0.508902	1.6466	0.130347	0.0257882	no	yes	no	yes
YEL063C::chr5_2	YEL063C	CAN1	0.508884	0.0507903	0.130355	0.606848	no	no	no	no
YAL053W::chr1_1	YAL053W	FLC2	0.508816	-0.390365	0.130388	0.811708	no	no	no	no
YGL168W::chr7_2	YGL168W	HUR1	0.508658	-2.64193	0.130465	0.99997	no	no	no	no
YMR176W::chr13_4	YMR176W	ECM5	0.508562	0.40956	0.130511	0.410023	no	no	no	no
YIL123W::chr9_2	YIL123W	SIM1	0.507134	0.462508	0.131202	0.381681	no	no	no	no
YPR040W::chr16_4	YPR040W	TIP41	0.506867	-2.01506	0.131332	0.999161	no	no	no	no
YBL081W::chr2_1	YBL081W	YBL081W	0.506635	0.535347	0.131444	0.343733	no	yes	no	yes
YLL052C::chr12_1	YLL052C	AQY2	0.505546	0.628894	0.131974	0.297258	no	no	no	no
YJL164C::chr10_1	YJL164C	TPK1	0.504849	1.71104	0.132314	0.0208648	no	no	no	no
YPR038W::chr16_4	YPR038W	IRC16	0.504704	1.25056	0.132384	0.0813178	no	no	no	no
YJL038C::chr10_2	YJL038C	LOH1	0.503962	-0.0275651	0.132747	0.64803	no	no	no	no
YBL052C::chr2_1	YBL052C	SAS3	0.503638	0.503638	0.132905	0.360086	yes	yes	yes	yes
YGL261C::chr7_3	YGL261C	PAU11	0.503425	0.741553	0.133009	0.245452	no	no	no	no
YFR023W::chr6_1	YFR023W	PES4	0.502166	0.385447	0.133627	0.423098	no	no	no	no
YNL246W::chr14_1	YNL246W	VPS75	0.500129	0.00542494	0.13463	0.630871	no	no	no	no
YDR333C::chr4_6	YDR333C	YDR333C	0.499625	0.499625	0.134879	0.362174	yes	yes	yes	yes
YER058W::chr5_3	YER058W	PET117	0.49906	-0.538885	0.135158	0.862279	no	no	no	no
YCR003W::chr3_1	YCR003W	MRPL32	0.498919	0.770368	0.135228	0.233026	no	no	no	no
YLR136C::chr12_3	YLR136C	TIS11	0.498513	0.677121	0.135429	0.274477	no	yes	no	yes
YBR020W::chr2_2	YBR020W	GAL1	0.497676	0.715924	0.135844	0.256797	no	no	no	no
YPL110C::chr16_2	YPL110C	GDE1	0.497412	-0.210442	0.135976	0.737012	no	no	no	no
YGR146C::chr7_5	YGR146C	ECL1	0.497373	0.918812	0.135995	0.174839	no	no	no	no
YPR012W::chr16_4	YPR012W	YPR012W	0.496727	0.899406	0.136317	0.181874	no	no	no	no
YPL105C::chr16_2	YPL105C	SYH1	0.49668	1.26382	0.13634	0.0785796	no	no	no	no
YGR133W::chr7_5	YGR133W	PEX4	0.492904	0.494996	0.138229	0.364589	no	no	no	no
YHR095W::chr8_2	YHR095W	YHR095W	0.491565	-0.0186852	0.138903	0.64344	yes	no	yes	no
YER173W::chr00_5	YER173W	RAD24	0.490087	-0.184601	0.13965	0.725163	no	no	no	no
YMR103C::chr00_9	YMR103C	YMR103C	0.489649	0.624562	0.139872	0.299346	no	no	no	no
YMR245W::chr13_5	YMR245W	YMR245W	0.48957	1.43206	0.139912	0.0496245	no	no	no	no
YBR164C::chr2_3	YBR164C	ARL1	0.488089	0.957367	0.140664	0.161381	no	no	no	no
YMR274C::chr13_5	YMR274C	RCE1	0.487866	-0.166044	0.140777	0.716494	no	no	no	no
YDR233C::chr4_5	YDR233C	RTN1	0.487176	0.897997	0.141129	0.182391	no	no	no	no
YOR114W::chr15_2	YOR114W	YOR114W	0.486989	1.45373	0.141224	0.0466139	no	no	no	no
YER108C::chr00_5	YER109C	FLO8	0.486189	-0.110475	0.141633	0.689782	no	no	no	no
YHR051W::chr8_2	YHR051W	COX6	0.486181	-0.818593	0.141637	0.930475	no	no	no	no
YPR148C::chr16_5	YPR148C	YPR148C	0.485962	-0.0594119	0.141748	0.664315	no	no	no	no
YLR451W::chr12_3	YLR451W	LEU3	0.485336	-0.0730298	0.142069	0.671187	no	no	no	no
YPL037C::chr16_3	YPL037C	EGD1	0.485104	0.627548	0.142188	0.297906	no	no	no	no
YKR049C::chr11_3	YKR049C	FMP46	0.485087	0.425838	0.142196	0.401252	no	no	no	no
YNL250W::chr00_8	YNL250W	RAD50	0.484461	0.539262	0.142518	0.341733	no	yes	no	yes
YBR129C::chr2_3	YBR129C	OPY1	0.48346	0.298451	0.143032	0.470875	yes	no	yes	no
YMR230W::chr13_4	YMR230W	RPS10B	0.48269	1.2711	0.143428	0.0771058	no	no	no	no
YDR334W::chr4_6	YDR334W	SWR1	0.482329	1.21391	0.143615	0.0892599	no	yes	no	yes
YOR191W::chr15_2	YOR191W	ULS1	0.482296	-0.0765616	0.143631	0.67296	no	no	no	no
YJR105W::chr10_4	YJR105W	ADO1	0.480669	1.48549	0.144472	0.0424663	no	yes	no	yes
YOR171C::chr15_2	YOR171C	LCB4	0.480559	0.858593	0.14453	0.197238	no	no	no	no
YGL224C::chr7_3	YGL224C	SDT1	0.479889	0.836728	0.144877	0.205783	no	no	no	no
YLL001W::chr12_1	YLL001W	DNM1	0.479654	0.785125	0.144999	0.226801	no	no	no	no
YKL047W::chr11_1	YKL047W	YKL047W	0.47909	0.585155	0.145292	0.318636	no	no	no	no
YOR158W::chr15_2	YOR158W	PET123	0.478807	1.06439	0.145439	0.127658	no	no	no	no
YKL102C::chr11_2	YKL102C	YKL102C	0.478309	0.603358	0.145698	0.30966	no	no	no	no
YKR003W::chr11_3	YKR003W	OSH6	0.478249	0.172075	0.14573	0.540843	no	no	no	no
YBL068W::chr2_1	YBL068W	PRS4	0.477228	0.726083	0.146262	0.252267	no	no	no	no
YBR116C::chr2_3	YBR116C	YBR116C	0.475965	0.746495	0.146923	0.243296	no	yes	no	yes
YLR125W::chr12_2	YLR125W	YLR125W	0.475581	1.00745	0.147124	0.144936	no	no	no	no
YMR037C::chr00_15	YMR037C	MSN2	0.475072	-1.67822	0.147391	0.996252	no	no	no	no
YCR028C-A::chr00_16a	YCR028C-A	RIM1	0.474945	0.262052	0.147458	0.49103	no	no	no	no
YNL123W::chr14_3	YNL123W	NMA111	0.474658	0.823955	0.147608	0.210875	no	no	no	no
YBR083W::chr00_16a	YBR083W	TEC1	0.474081	0.166989	0.147912	0.543648	no	no	no	no
YOR302W::chr00_17b	YOR302W	YOR302W	0.473132	1.21659	0.148412	0.0886603	no	no	no	no
YBL048W::chr2_1	YBL048W	RRT1	0.473037	1.08119	0.148462	0.122845	no	no	no	no
YKL198C::chr11_3	YKL198C	PTK1	0.472985	0.432657	0.14849	0.397592	no	no	no	no
YDR357C::chr4_7	YDR357C	CNL1	0.472683	0.16581	0.148649	0.544297	no	no	no	no
YIL162W::chr9_2	YIL162W	SUC2	0.472502	0.854451	0.148744	0.19884	no	no	no	no
YBR010W::chr2_2	YBR010W	HHT1	0.472237	1.6709	0.148885	0.0238278	no	no	no	no
YNL136W::chr14_3	YNL136W	EAF7	0.471578	0.941762	0.149233	0.166744	no	no	no	no
YIL084C::chr9_1	YIL084C	SDS3	0.471217	-0.326132	0.149424	0.786676	yes	no	yes	no
YLR091W::chr12_2	YLR091W	GEP5	0.471217	0.109542	0.149424	0.575136	yes	no	yes	no
YEL003W::chr5_2	YEL003W	GIM4	0.470491	2.79398	0.149809	0.000199133	no	no	no	yes
YKL169C::chr11_2	YKL169C	YKL169C	0.470257	0.385811	0.149933	0.4229	no	no	no	no
YBR103W::chr2_3	YBR103W	SIF2	0.470147	1.37811	0.149992	0.0577991	no	yes	no	yes
YBR185C::chr2_4	YBR185C	MBA1	0.469877	0.19951	0.150135	0.525687	no	no	no	no
YML102W::chr00_9	YML102W	CAC2	0.469087	0.874408	0.150555	0.191194	no	no	no	no
YDR455C::chr4_8	YDR455C	YDR455C	0.468593	0.620667	0.150819	0.301229	no	yes	no	yes
YNL329C::chr14_1	YNL329C	PEX6	0.468263	0.214489	0.150994	0.517394	no	no	no	no
YCL024W::chr3_1	YCL024W	KCC4	0.466512	1.19101	0.151931	0.0945062	no	no	no	no
YLR412W::chr12_5	YLR412W	BER1	0.465769	1.8143	0.152329	0.0146391	no	yes	no	yes
YIL170W::chr9_2	YIL170W	HXT12	0.465618	-0.132559	0.15241	0.70053	no	no	no	no
YBR157C::chr2_3	YBR157C	ICS2	0.464434	0.912397	0.153047	0.177145	no	no	no	no
YGR081C::chr7_4	YGR081C	SLX9	0.46363	0.870762	0.15348	0.192577	no	no	no	no
YHR134W::chr8_2	YHR134W	WSS1	0.463602	0.810218	0.153495	0.216433	no	no	no	no
YLR438W::chr00_4	YLR438W	CAR2	0.463192	0.363146	0.153716	0.435267	no	no	no	no
YNL141W::chr14_3	YNL141W	AAH1	0.463192	1.28889	0.153716	0.0735944	no	no	no	no
YBR137W::chr2_3	YBR137W	YBR137W	0.463154	0.524533	0.153736	0.349279	no	no	no	no
YLL048C::chr00_8	YLL048C	YBT1	0.462648	0.764549	0.15401	0.235507	no	no	no	no
YOR131C::chr15_2	YOR131C	YOR131C	0.462284	0.484097	0.154207	0.370295	no	no	no	no
YDR032C::chr4_3	YDR032C	PST2	0.461927	-0.0292001	0.1544	0.648873	no	no	no	no
YDL194W::chr00_16b	YDL194W	SNF3	0.461897	-2.59441	0.154416	0.99996	no	no	no	no
YML131W::chr00_9	YML131W	YML131W	0.461863	0.915106	0.154435	0.176168	no	no	no	no
YNL201C::chr14_2	YNL201C	PSY2	0.461849	0.249325	0.154442	0.498086	no	no	no	no
YHL024W::chr00_8	YHL024W	RIM4	0.461769	0.451594	0.154485	0.387477	no	no	no	no
YMR102C::chr00_9	YMR102C	YMR102C	0.461749	0.00739495	0.154496	0.629837	no	no	no	no
YLR413W::chr12_5	YLR413W	YLR413W	0.461475	0.820014	0.154645	0.212461	no	no	no	no
YBR027C::chr2_2	YBR027C	YBR027C	0.461285	0.461295	0.154748	0.382324	no	no	no	no
YKR057W::chr11_3	YKR057W	RPS21A	0.461019	1.18176	0.154892	0.0966892	no	no	no	no
YLR119W::chr12_2	YLR119W	SRN2	0.460435	1.47326	0.155209	0.0440259	no	yes	no	yes
YLR444C::chr00_4	YLR444C	YLR444C	0.460342	1.23337	0.15526	0.0849733	no	yes	no	yes
YJL052W::chr10_2	YJL052W	TDH1	0.459843	2.2381	0.155531	0.00281405	no	yes	no	yes
YDR395W::chr4_7	YDR395W	SXM1	0.457917	1.72726	0.156581	0.0197587	no	no	no	no
YCL012W::chr3_1	YCL014W	BUD3	0.457233	1.09656	0.156955	0.118556	no	no	no	no
YJL016W::chr00_13	YJL016W	YJL016W	0.456789	0.413643	0.157198	0.407819	no	no	no	no
YHR163W::chr8_3	YHR163W	SOL3	0.455357	0.550944	0.157984	0.335793	no	yes	no	yes
YNL274C::chr00_10	YNL274C	GOR1	0.454979	-0.0361461	0.158192	0.652447	no	no	no	no
YPR201W::chr16_5	YPR201W	ARR3	0.454814	1.48808	0.158283	0.0421417	no	yes	no	yes
YNL177C::chr14_2	YNL177C	MRPL22	0.454017	-0.315244	0.158722	0.782248	no	no	no	no
YPL189W::chr00_11	YPL189W	GUP2	0.45369	0.489397	0.158902	0.367517	no	no	no	no
YMR110C::chr00_9	YMR110C	HFD1	0.453293	0.607975	0.159121	0.307401	no	yes	no	yes
YPR191W::chr16_5	YPR191W	QCR2	0.453066	-1.53521	0.159247	0.993343	no	no	no	no
YAL021C::chr1_1	YAL021C	CCR4	0.451995	0.894428	0.159839	0.183707	no	yes	no	yes
YMR250W::chr13_5	YMR250W	GAD1	0.451532	-0.451422	0.160096	0.833743	no	no	no	no
YKL030W::chr00_12	YKL030W	YKL030W	0.450628	-0.476925	0.160598	0.842432	no	no	no	no
YPR069C::chr16_4	YPR069C	SPE3	0.450389	2.63298	0.16073	0.000454178	no	no	no	yes
YIL163C::chr9_2	YIL163C	YIL163C	0.449934	0.605476	0.160984	0.308623	no	no	no	no
YBR052C::chr2_2	YBR052C	RFS1	0.449767	0.699935	0.161077	0.264009	no	no	no	no
YJR153W::chr00_12	YJR153W	PGU1	0.449716	0.703489	0.161105	0.262397	no	no	no	no
YGR131W::chr7_5	YGR131W	FHN1	0.449683	1.14205	0.161123	0.106481	no	no	no	no
YCR044C::chr00_1	YCR044C	PER1	0.448981	-1.43098	0.161514	0.990107	yes	no	yes	no
YPL214C::chr16_1	YPL214C	THI6	0.448061	0.38016	0.162028	0.425977	no	no	no	no
YNL014W::chr00_18	YNL014W	HEF3	0.447755	-0.53645	0.162199	0.861532	no	no	no	no
YMR075W::chr00_6	YMR075W	RCO1	0.447233	1.3292	0.162491	0.0660915	no	yes	no	yes
YFL048C::chr6_1	YFL048C	EMP47	0.447233	0.793799	0.162491	0.223185	no	no	no	no
YKL056C::chr11_1	YKL056C	TMA19	0.447194	0.111753	0.162513	0.573931	no	no	no	no
YKR018C::chr11_3	YKR018C	YKR018C	0.446754	0.139411	0.162759	0.558811	no	no	no	no
YIL110W::chr9_2	YIL110W	HPM1	0.446474	2.41058	0.162917	0.00131315	no	no	no	no
YKR044W::chr11_3	YKR044W	UIP5	0.44643	1.2382	0.162941	0.0839348	no	yes	no	yes
YLR428C::chr00_4	YLR428C	YLR428C	0.445957	0.155224	0.163207	0.550125	no	no	no	no
YLR415C::chr12_5	YLR415C	YLR415C	0.445717	0.0210397	0.163341	0.622655	no	no	no	no
YLR098C::chr12_2	YLR098C	CHA4	0.445405	1.23095	0.163517	0.0854974	no	yes	no	yes
YGL250W::chr7_3	YGL250W	RMR1	0.445401	0.848658	0.163519	0.201094	no	no	no	no
YML119W::chr00_9	YML119W	YML119W	0.445208	0.551104	0.163627	0.335712	no	no	no	no
YBR059C::chr2_2	YBR059C	AKL1	0.445068	0.221156	0.163706	0.513701	no	no	no	no
YNL283C::chr14_1	YNL283C	WSC2	0.443475	1.67469	0.164604	0.0235339	no	no	no	no
YOR076C::chr15_1	YOR076C	SKI7	0.443214	1.84046	0.164752	0.0133434	no	no	no	no
YBL070C::chr2_1	YBL070C	YBL070C	0.442713	0.432926	0.165035	0.397448	no	no	no	no
YBR067C::chr2_2	YBR067C	TIP1	0.442693	0.553188	0.165046	0.334656	no	no	no	no
YKR060W::chr11_3	YKR060W	UTP30	0.441761	0.0712753	0.165574	0.59586	no	no	no	no
YKR073C::chr00_3	YKR073C	YKR073C	0.441031	1.08584	0.165988	0.121535	no	yes	no	yes
YMR097C::chr00_9	YMR097C	MTG1	0.439505	-0.910608	0.166855	0.945996	no	no	no	no
YBL085W::chr2_1	YBL085W	BOI1	0.439182	1.3962	0.16704	0.0549468	no	no	no	no
YGR233C::chr00_2	YGR233C	PHO81	0.43752	4.65158	0.167989	4.59675e-10	no	yes	no	yes
YHR132C::chr8_2	YHR132C	ECM14	0.437518	0.663034	0.16799	0.281042	no	no	no	no
YHR142W::chr8_3	YHR142W	CHS7	0.43698	0.817149	0.168297	0.213618	no	no	no	no
YMR018W::chr13_2	YMR018W	YMR018W	0.436114	0.712585	0.168794	0.258294	no	no	no	no
YAL067C::chr1_1	YAL067C	SEO1	0.434926	0.974038	0.169477	0.155777	no	no	no	no
YMR252C::chr13_5	YMR252C	YMR252C	0.434495	0.326391	0.169725	0.455451	no	no	no	no
YJL182C::chr10_1	YJL182C	YJL182C	0.433777	-0.193185	0.170139	0.729128	no	no	no	no
YFR041C::chr00_2	YFR041C	ERJ5	0.433323	0.804462	0.170401	0.218786	no	no	no	no
YKR058W::chr11_3	YKR058W	GLG1	0.433218	0.223194	0.170461	0.512571	no	no	no	no
YKL066W::chr11_1	YKL066W	YKL066W	0.433183	-0.979337	0.170482	0.955691	no	no	no	no
YDR179C::chr4_5	YDR179C	CSN9	0.43304	0.43304	0.170564	0.397387	yes	yes	yes	yes
YDL089W::chr4_1	YDL089W	NUR1	0.432853	1.05392	0.170672	0.130724	no	no	no	no
YDR234W::chr4_5	YDR234W	LYS4	0.43278	-0.318366	0.170714	0.783524	no	no	no	no
YER145C::chr00_5	YER145C	FTR1	0.432486	0.385883	0.170884	0.422861	no	no	no	no
YHR146W::chr00_15	YHR146W	CRP1	0.431946	0.199693	0.171197	0.525585	no	no	no	no
YKL062W::chr11_1	YKL062W	MSN4	0.431261	1.24717	0.171594	0.0820294	no	no	no	no
YBR099C::chr2_3	YBR099C	YBR099C	0.430826	0.899993	0.171846	0.181658	no	no	no	no
YOR121C::chr15_2	YOR121C	YOR121C	0.430415	0.0428622	0.172085	0.611079	no	no	no	no
YLR325C::chr12_5	YLR325C	RPL38	0.430197	-0.704344	0.172211	0.906676	no	no	no	no
YDR293C::chr4_6	YDR293C	SSD1	0.429638	-1.02896	0.172537	0.961778	yes	no	yes	no
YPL163C::chr16_2	YPL163C	SVS1	0.429028	0.428123	0.172892	0.400025	no	no	no	no
YPL144W::chr16_2	YPL144W	POC4	0.428489	0.773869	0.173206	0.231541	no	no	no	no
YGL132W::chr7_2	YGL132W	YGL132W	0.428348	0.742086	0.173289	0.245219	no	yes	no	yes
YLR118C::chr12_2	YLR118C	YLR118C	0.427663	1.18171	0.173689	0.0967014	no	yes	no	yes
YLR432W::chr00_4	YLR432W	IMD3	0.426996	0.865909	0.174078	0.194428	no	no	no	no
YHR206W::chr8_3	YHR206W	SKN7	0.426742	-1.04663	0.174227	0.963773	no	no	no	no
YKL006W::chr11_1	YKL006W	RPL14A	0.42624	1.8143	0.174521	0.0146391	no	yes	no	yes
YBR180W::chr2_4	YBR180W	DTR1	0.426101	-0.499628	0.174603	0.849912	no	no	no	no
YBR229C::chr2_4	YBR229C	ROT2	0.425864	-0.150884	0.174742	0.709317	no	no	no	no
YLR262C-A::chr00_4	YLR262C-A	TMA7	0.425439	0.786572	0.174991	0.226195	no	yes	no	yes
YJL012C::chr00_13	YJL012C	VTC4	0.425413	-0.243443	0.175006	0.751756	yes	no	yes	no
YLR074C::chr12_2	YLR074C	BUD20	0.425413	0.425413	0.175006	0.401481	yes	yes	yes	yes
YJL079C::chr10_2	YJL079C	PRY1	0.424124	1.07248	0.175764	0.125324	no	yes	no	yes
YDR524C::chr4_8	YDR524C	AGE1	0.423555	0.358813	0.176099	0.437639	no	no	no	no
YPL139C::chr16_2	YPL139C	UME1	0.423026	-0.727897	0.176412	0.912019	no	no	no	no
YER064C::chr00_8	YER064C	VHR2	0.42288	0.53913	0.176498	0.3418	no	no	no	no
YER028C::chr5_3	YER028C	MIG3	0.421297	0.31181	0.177434	0.463493	no	no	no	no
YMR175W::chr13_4	YMR175W	SIP18	0.421184	-0.123012	0.177501	0.695904	no	no	no	no
YBL053W::chr2_1	YBL053W	YBL053W	0.421107	0.485009	0.177547	0.369816	no	no	no	no
YHL032C::chr8_1	YHL032C	GUT1	0.421107	-0.0174912	0.177547	0.642821	no	no	no	no
YGR256W::chr00_3	YGR256W	GND2	0.421041	1.04521	0.177586	0.133311	no	yes	no	yes
YHR181W::chr00_8	YHR181W	SVP26	0.421	0.303439	0.17761	0.468117	no	no	no	no
YBR275C::chr00_16a	YBR275C	RIF1	0.42006	1.12553	0.178168	0.11076	no	yes	no	yes
YOR040W::chr15_1	YOR040W	GLO4	0.419245	0.252822	0.178652	0.496147	no	no	no	no
YFL036W::chr6_1	YFL036W	RPO41	0.418452	-1.08881	0.179124	0.968193	no	no	no	no
YGR236C::chr00_2	YGR236C	SPG1	0.41707	0.178675	0.179949	0.537202	no	no	no	no
YDR223W::chr4_5	YDR223W	CRF1	0.416304	1.15877	0.180407	0.102274	no	no	no	no
YLR089C::chr12_2	YLR089C	ALT1	0.415653	-0.894061	0.180798	0.943428	no	no	no	no
YMR058W::chr00_5	YMR058W	FET3	0.415639	1.41216	0.180806	0.0525249	no	no	no	no
YMR174C::chr13_4	YMR174C	PAI3	0.41539	0.645976	0.180955	0.28909	no	no	no	no
YPL132W::chr00_8	YPL132W	COX11	0.413797	-1.1547	0.181912	0.974199	no	no	no	no
YOR196C::chr15_3	YOR196C	LIP5	0.413365	-1.23109	0.182172	0.979945	no	no	no	no
YNL231C::chr14_2	YNL231C	PDR16	0.413211	-0.0483162	0.182265	0.658674	no	no	no	no
YPR057W::chr16_4	YPR057W	BRR1	0.412753	0.809108	0.182541	0.216885	no	no	no	no
YBR068C::chr2_2	YBR068C	BAP2	0.412584	-0.602826	0.182643	0.880896	no	no	no	no
YGR239C::chr00_14	YGR239C	PEX21	0.412498	0.571836	0.182694	0.325271	no	no	no	no
YLR094C::chr12_2	YLR094C	GIS3	0.412116	0.912652	0.182925	0.177053	no	yes	no	yes
YLR431C::chr00_4	YLR431C	ATG23	0.412099	0.844856	0.182936	0.202581	no	no	no	no
YJR144W::chr00_12	YJR144W	MGM101	0.411897	-1.13673	0.183057	0.972664	no	no	no	no
YCR095C::chr00_14	YCR095C	OCA4	0.411195	2.42951	0.183482	0.00120388	no	no	no	no
YLR180W::chr12_3	YLR180W	SAM1	0.410522	0.525374	0.183889	0.348846	no	no	no	no
YNL248C::chr14_1	YNL248C	RPA49	0.409472	0.630171	0.184526	0.296644	no	yes	no	yes
YKL170W::chr11_2	YKL170W	MRPL38	0.409379	-0.916306	0.184583	0.946859	no	no	no	no
YMR119W-A::chr00_9	YMR119W-A	YMR119W-A	0.409311	0.266143	0.184623	0.488762	no	no	no	no
YHR147C::chr8_3	YHR147C	MRPL6	0.40839	0.0516138	0.185184	0.606408	yes	no	yes	no
YJL007C::chr00_13	YJL007C	YJL007C	0.40839	0.185197	0.185184	0.5336	yes	no	yes	no
YNL219C::chr14_2	YNL219C	ALG9	0.407333	0.0393188	0.185827	0.612966	no	no	no	no
YBR078W::chr2_2	YBR078W	ECM33	0.407257	-1.87202	0.185874	0.998377	no	no	no	no
YBR005W::chr2_2	YBR005W	RCR1	0.406743	0.630493	0.186187	0.296489	no	no	no	no
YOR071C::chr15_1	YOR071C	NRT1	0.406013	0.168974	0.186633	0.542554	no	no	no	no
YBR061C::chr2_2	YBR061C	TRM7	0.405727	-0.851819	0.186808	0.936434	no	no	no	no
YDL213C::chr4_3	YDL213C	NOP6	0.405509	1.09327	0.186942	0.119463	no	no	no	no
YOL103W::chr00_6	YOL103W	ITR2	0.405403	0.820367	0.187007	0.212318	no	no	no	no
YDR024W::chr4_3	YDR024W	FYV1	0.404909	-0.147817	0.187309	0.707855	no	no	no	no
YNL229C::chr14_2	YNL229C	URE2	0.404552	-0.442371	0.187528	0.830586	no	no	no	no
YOL059W::chr15_5	YOL059W	GPD2	0.404201	0.93632	0.187743	0.168641	no	no	no	no
YDR536W::chr00_2	YDR536W	STL1	0.404193	0.341036	0.187748	0.447392	no	no	no	no
YML110C::chr00_9	YML110C	COQ5	0.404103	0.186303	0.187804	0.532989	yes	no	yes	no
YLR152C::chr12_3	YLR152C	YLR152C	0.402443	0.586148	0.188824	0.318143	no	no	no	no
YDL130W::chr4_2	YDL130W	RPP1B	0.40216	-1.1568	0.188998	0.974374	no	no	no	no
YDR165W::chr4_5	YDR165W	TRM82	0.401268	0.788863	0.189548	0.225238	no	no	no	no
YLR429W::chr00_4	YLR429W	CRN1	0.401042	0.511631	0.189688	0.355938	no	yes	no	yes
YDR378C::chr4_7	YDR378C	LSM6	0.400565	0.372081	0.189983	0.430384	no	no	no	no
YBL039C::chr2_1	YBL039C	URA7	0.399322	2.42011	0.190752	0.00125701	no	yes	no	yes
YBR169C::chr00_16a	YBR169C	SSE2	0.399255	1.72177	0.190794	0.0201273	no	no	no	no
YPL021W::chr16_3	YPL021W	ECM23	0.398775	0.397023	0.191091	0.41681	no	no	no	no
YER140W::chr00_5	YER140W	YER140W	0.398436	0.026763	0.191301	0.619629	no	no	no	no
YAR035W::chr1_1	YAR035W	YAT1	0.398425	0.653736	0.191308	0.285416	no	no	no	no
YML034W::chr13_2	YML034W	SRC1	0.398295	0.232244	0.191389	0.507555	no	no	no	no
YBR045C::chr2_2	YBR045C	GIP1	0.397919	1.91836	0.191623	0.0100536	no	no	no	no
YPL216W::chr16_1	YPL216W	YPL216W	0.397911	0.592625	0.191628	0.314939	no	no	no	no
YPR067W::chr00_15	YPR067W	ISA2	0.397183	0.804949	0.19208	0.218587	no	no	no	no
YDR262W::chr4_6	YDR262W	YDR262W	0.395489	0.395489	0.193136	0.417642	yes	yes	yes	yes
YDR512C::chr00_17a	YDR512C	EMI1	0.395489	0.331495	0.193136	0.45264	yes	no	yes	no
YLR315W::chr12_4	YLR315W	NKP2	0.395489	-0.281251	0.193136	0.768089	yes	no	yes	no
YNL236W::chr14_2	YNL236W	SIN4	0.395489	0.395489	0.193136	0.417642	yes	yes	yes	yes
YBL055C::chr2_1	YBL055C	YBL055C	0.394893	0.665752	0.193509	0.279769	no	no	no	no
YMR251W-A::chr13_5	YMR251W-A	HOR7	0.394888	0.509217	0.193512	0.357189	no	no	no	no
YPL113C::chr16_2	YPL113C	YPL113C	0.394437	0.983329	0.193794	0.15271	no	yes	no	yes
YML006C::chr13_2	YML006C	GIS4	0.394028	1.13849	0.19405	0.107393	no	yes	no	yes
YMR253C::chr13_5	YMR253C	YMR253C	0.393762	0.167338	0.194217	0.543455	no	no	no	no
YBL091C::chr2_1	YBL091C	MAP2	0.392765	-0.534011	0.194842	0.860782	no	no	no	no
YPL155C::chr16_2	YPL155C	KIP2	0.392601	0.139542	0.194945	0.558739	no	no	no	no
YPR115W::chr16_5	YPR115W	RGC1	0.392475	0.563662	0.195024	0.329372	no	no	no	no
YKL200C::chr11_3	YKL201C	MNN4	0.39194	1.19914	0.19536	0.0926192	no	yes	no	yes
YGR220C::chr00_2	YGR220C	MRPL9	0.391761	-0.25582	0.195472	0.757169	no	no	no	no
YOR338W::chr15_4	YOR338W	YOR338W	0.39164	0.927592	0.195549	0.171713	no	no	no	no
YOR183W::chr15_2	YOR183W	FYV12	0.390833	0.0324383	0.196057	0.616621	no	no	no	no
YBR173C::chr2_4	YBR173C	UMP1	0.390235	0.104245	0.196434	0.578018	no	no	no	no
YKL051W::chr11_1	YKL051W	SFK1	0.389983	0.0531592	0.196593	0.605582	no	no	no	no
YDL136W::chr4_2	YDL136W	RPL35B	0.389714	-1.20672	0.196763	0.978243	no	no	no	no
YBL091C-A::chr00_1	YBL091C-A	SCS22	0.389535	0.486239	0.196876	0.369171	no	no	no	no
YIL159W::chr9_2	YIL159W	BNR1	0.38906	0.703205	0.197176	0.262526	no	no	no	no
YPL173W::chr16_2	YPL173W	MRPL40	0.388808	0.188941	0.197335	0.531531	no	no	no	no
YNL160W::chr14_2	YNL160W	YGP1	0.38824	0.217647	0.197695	0.515645	no	no	no	no
YAL048C::chr1_1	YAL048C	GEM1	0.388238	0.313128	0.197696	0.462766	no	no	no	no
YBR076W::chr2_2	YBR076W	ECM8	0.387788	0.587566	0.197981	0.317441	no	no	no	no
YPR031W::chr00_15	YPR031W	NTO1	0.386345	1.53439	0.198897	0.0366694	no	no	no	no
YMR053C::chr00_5	YMR053C	STB2	0.385758	0.053526	0.19927	0.605386	no	no	no	no
YBR074W::chr2_2	YBR074W	YBR074W	0.385244	0.604833	0.199598	0.308937	no	no	no	no
YOR032C::chr15_1	YOR032C	HMS1	0.384981	-0.0136722	0.199765	0.640839	no	no	no	no
YBR266C::chr2_4	YBR266C	SLM6	0.384445	0.996469	0.200107	0.148442	no	yes	no	yes
YER095W::chr00_8	YER095W	RAD51	0.383476	0.40735	0.200726	0.411218	no	no	no	no
YPR151C::chr00_18	YPR151C	SUE1	0.383219	1.26972	0.20089	0.0773843	no	no	no	no
YLR449W::chr00_4	YLR449W	FPR4	0.383105	0.605087	0.200963	0.308813	no	no	no	no
YLR134W::chr12_3	YLR134W	PDC5	0.382473	-0.763316	0.201368	0.919619	yes	no	yes	no
YPL225W::chr16_1	YPL225W	YPL225W	0.382159	1.30981	0.201569	0.0696237	no	no	no	no
YML079W::chr13_1b	YML079W	YML079W	0.3821	-0.145785	0.201607	0.706884	no	no	no	no
YKL115C::chr00_14	YKL115C	YKL115C	0.381614	0.467112	0.201918	0.379244	no	yes	no	yes
YJR098C::chr00_12	YJR098C	YJR098C	0.380681	0.365707	0.202517	0.433866	no	no	no	no
YDR406W::chr4_7	YDR406W	PDR15	0.379848	1.16919	0.203053	0.0997143	no	no	no	no
YBR130C::chr2_3	YBR130C	SHE3	0.379659	0.603038	0.203175	0.309817	no	no	no	no
YMR161W::chr13_4	YMR161W	HLJ1	0.379588	-0.141813	0.20322	0.704982	no	no	no	no
YNL205C::chr14_2	YNL205C	YNL205C	0.378972	0.982515	0.203617	0.152977	no	no	no	no
YPR068C::chr16_4	YPR068C	HOS1	0.378592	0.811098	0.203862	0.216074	no	no	no	no
YDL173W::chr4_2	YDL173W	PAR32	0.378107	-2.22918	0.204175	0.999709	yes	no	yes	no
YPL101W::chr16_2	YPL101W	ELP4	0.377936	0.566012	0.204285	0.328191	no	no	no	no
YDR071C::chr00_11	YDR071C	PAA1	0.37786	-0.30354	0.204335	0.777431	no	no	no	no
YLR363C::chr12_5	YLR363C	NMD4	0.377288	-0.125197	0.204705	0.696965	no	no	no	no
YNL190W::chr14_2	YNL190W	YNL190W	0.376855	-0.145319	0.204985	0.706661	no	no	no	no
YBR246W::chr2_4	YBR246W	RRT2	0.376132	0.617857	0.205453	0.30259	no	no	no	no
YLR112W::chr12_2	YLR112W	YLR112W	0.376034	1.06936	0.205516	0.12622	no	no	no	no
YLR445W::chr00_4	YLR445W	GMC2	0.375618	0.179207	0.205786	0.536909	no	no	no	no
YOR320C::chr15_4	YOR320C	GNT1	0.375288	0.902143	0.206	0.180871	no	no	no	no
YPL149W::chr16_2	YPL149W	ATG5	0.374464	0.562532	0.206535	0.329941	no	yes	no	yes
YDR114C::chr4_4	YDR114C	YDR114C	0.374422	-0.731387	0.206563	0.912791	no	no	no	no
YDR043C::chr4_3	YDR043C	NRG1	0.373765	-2.08234	0.20699	0.999393	no	no	no	no
YCR048W::chr00_16a	YCR048W	ARE1	0.372871	-0.419861	0.207573	0.822569	no	no	no	no
YHR041C::chr00_10	YHR041C	SRB2	0.372679	-0.862818	0.207698	0.938317	no	no	no	no
YOL159C::chr00_10	YOL159C	YOL159C	0.372422	-1.00341	0.207866	0.958735	no	no	no	no
YPL036W::chr00_17b	YPL036W	PMA2	0.371149	0.320575	0.208697	0.458657	no	no	no	no
YNL101W::chr14_3	YNL101W	AVT4	0.370919	0.199593	0.208848	0.525641	no	no	no	no
YNL324W::chr14_1	YNL324W	YNL324W	0.370026	0.593405	0.209433	0.314554	no	no	no	no
YDR025W::chr4_3	YDR025W	RPS11A	0.370008	-0.0622673	0.209445	0.66576	no	no	no	no
YOL110W::chr00_6	YOL110W	SHR5	0.369559	-0.498307	0.209738	0.849483	no	no	no	no
YIR028W::chr00_3	YIR028W	DAL4	0.368438	0.589891	0.210475	0.31629	no	no	no	no
YHR133C::chr8_2	YHR133C	NSG1	0.367586	1.30777	0.211035	0.0700033	no	no	no	no
YJR077C::chr00_12	YJR077C	MIR1	0.367424	0.00503869	0.211142	0.631073	no	no	no	no
YOR138C::chr15_2	YOR138C	RUP1	0.367409	0.245872	0.211152	0.5	no	no	no	no
YBL096C::chr2_2	YBL096C	YBL096C	0.367248	0.296253	0.211258	0.47209	no	no	no	no
YGL148W::chr7_2	YGL148W	ARO2	0.366827	0.736299	0.211536	0.247756	no	yes	no	yes
YJR011C::chr00_13	YJR011C	YJR011C	0.365901	2.22732	0.212147	0.00294621	no	yes	no	yes
YMR266W::chr13_5	YMR266W	RSN1	0.365691	-0.225661	0.212286	0.743867	no	no	no	no
YOL090W::chr00_6	YOL090W	MSH2	0.365558	0.581641	0.212373	0.320381	no	yes	no	yes
YKR076W::chr00_3	YKR076W	ECM4	0.365395	1.4182	0.212481	0.0516318	no	no	no	no
YFL013C::chr00_17a	YFL013C	IES1	0.365349	1.93808	0.212511	0.00934284	no	yes	no	yes
YBR238C::chr2_4	YBR238C	YBR238C	0.365278	-0.447881	0.212558	0.832513	no	no	no	no
YLR012C::chr12_1	YLR012C	YLR012C	0.365157	-0.855812	0.212638	0.937123	no	no	no	no
YHR113W::chr8_2	YHR113W	APE4	0.365104	0.672719	0.212674	0.276521	no	no	no	no
YFR013W::chr00_16b	YFR013W	IOC3	0.364757	0.74371	0.212903	0.24451	no	no	no	no
YKR061W::chr11_3	YKR061W	KTR2	0.364193	0.0564371	0.213277	0.603828	no	no	no	no
YPL178W::chr16_2	YPL178W	CBC2	0.363525	2.88292	0.213719	0.000123751	no	yes	no	yes
YBR051W::chr2_2	YBR051W	YBR051W	0.361293	0.264493	0.215203	0.489677	no	no	no	no
YLR004C::chr12_1	YLR004C	THI73	0.361041	-0.152502	0.21537	0.710087	no	no	no	no
YDR042C::chr4_3	YDR042C	YDR042C	0.361005	0.227048	0.215395	0.510436	no	no	no	no
YMR101C::chr00_9	YMR101C	SRT1	0.360513	0.360513	0.215722	0.436707	yes	yes	yes	yes
YLR312W-A::chr12_4	YLR312W-A	MRPL15	0.360394	-1.32108	0.215802	0.985285	no	no	no	no
YLR170C::chr12_3	YLR170C	APS1	0.359569	0.566374	0.216352	0.328009	no	yes	no	yes
YDR463W::chr4_8	YDR463W	STP1	0.359044	1.1634	0.216703	0.101131	no	no	no	no
YKL016C::chr11_1	YKL016C	ATP7	0.358999	-0.0843456	0.216734	0.676854	no	no	no	no
YCR004C::chr3_1	YCR004C	YCP4	0.358886	-0.232302	0.216809	0.746828	no	no	no	no
YCR033W::chr00_16a	YCR033W	SNT1	0.3584	0.690901	0.217134	0.26813	no	no	no	no
YFR024C::chr00_15	YFR024C-A	LSB3	0.358256	0.271128	0.217231	0.486	no	no	no	no
YER103W::chr00_5	YER103W	SSA4	0.358215	0.976397	0.217259	0.154994	no	no	no	no
YDR286C::chr4_6	YDR286C	YDR286C	0.358215	0.391435	0.217259	0.419843	no	no	no	no
YNL275W::chr14_1	YNL275W	BOR1	0.357117	1.13505	0.217994	0.10828	no	no	no	no
YBR001C::chr2_2	YBR001C	NTH2	0.356685	0.565799	0.218284	0.328298	no	no	no	no
YDR001C::chr4_3	YDR001C	NTH1	0.35632	0.905501	0.218529	0.179645	no	no	no	no
YLR287C::chr12_4	YLR287C	YLR287C	0.356081	0.340996	0.21869	0.447414	yes	no	yes	no
YML052W::chr13_1b	YML052W	SUR7	0.356064	-0.311852	0.218702	0.780858	no	no	no	no
YBL010C::chr2_1	YBL010C	YBL010C	0.356011	1.46219	0.218737	0.0454787	no	no	no	no
YIL155C::chr9_2	YIL155C	GUT2	0.355275	-0.108984	0.219232	0.68905	no	no	no	no
YOL013W-A::chr00_6	YOL013W-A	YOL013W-A	0.355195	0.034275	0.219286	0.615646	no	no	no	no
YLR015W::chr12_1	YLR015W	BRE2	0.354764	-0.138473	0.219577	0.703379	no	no	no	no
YER051W::chr5_3	YER051W	JHD1	0.35465	0.0657017	0.219653	0.598858	no	no	no	no
YLR439W::chr00_15	YLR439W	MRPL4	0.354214	0.78856	0.219947	0.225365	no	no	no	no
YMR295C::chr13_5	YMR295C	YMR295C	0.354052	0.894399	0.220056	0.183717	no	no	no	no
YOL048C::chr15_5	YOL048C	RRT8	0.353151	0.946819	0.220664	0.164994	no	no	no	no
YML081W::chr13_1b	YML081W	TDA9	0.353022	-0.0742022	0.220752	0.671776	no	no	no	no
YBR093C::chr2_3	YBR093C	PHO5	0.352507	0.583906	0.2211	0.319255	no	no	no	no
YBR177C::chr2_4	YBR177C	EHT1	0.352299	1.862	0.221241	0.0123516	no	no	no	no
YNL197C::chr14_2	YNL197C	WHI3	0.351357	2.62189	0.221879	0.000479887	no	yes	no	yes
YAL026C::chr1_1	YAL026C	DRS2	0.351064	-0.745148	0.222077	0.915785	no	no	no	no
YJR121W::chr00_12	YJR121W	ATP2	0.350577	0.0848122	0.222408	0.588556	yes	no	yes	no
YOR030W::chr15_1	YOR030W	DFG16	0.349768	1.15389	0.222957	0.103489	no	yes	no	yes
YBR020W::chr00_18	YBR020W	GAL1	0.349371	0.64823	0.223227	0.288021	no	no	no	no
YOR049C::chr15_1	YOR049C	RSB1	0.349004	-0.618567	0.223477	0.885193	no	no	no	no
YDR070C::chr4_4	YDR070C	FMP16	0.348895	0.722546	0.223551	0.253839	no	yes	no	yes
YMR127C::chr00_9	YMR127C	SAS2	0.348471	0.879064	0.22384	0.189436	no	yes	no	yes
YDR035W::chr4_3	YDR035W	ARO3	0.34831	-1.39215	0.22395	0.98859	no	no	no	no
YKL106W::chr11_2	YKL106W	AAT1	0.34769	-0.63583	0.224372	0.889777	no	no	no	no
YPL095C::chr16_2	YPL095C	EEB1	0.346789	0.168909	0.224987	0.542589	no	no	no	no
YJL063C::chr10_2	YJL063C	MRPL8	0.346176	-0.808575	0.225407	0.928596	no	no	no	no
YFR045W::chr00_2	YFR045W	YFR045W	0.344756	0.202101	0.226379	0.524253	no	no	no	no
YJR078W::chr10_4	YJR078W	BNA2	0.343582	-0.107667	0.227185	0.688403	no	no	no	no
YOL151W::chr00_17b/chr00_18	YOL151W	GRE2	0.343518	0.184244	0.227228	0.534127	no	no	no	no
YBR032W::chr2_2	YBR032W	YBR032W	0.342781	0.48333	0.227735	0.370697	no	no	no	no
YNR055C::chr00_15	YNR055C	HOL1	0.342772	0.0960003	0.227741	0.582496	no	no	no	no
YNR030W::chr14_4	YNR030W	ALG12	0.342588	0.663978	0.227868	0.2806	no	no	no	no
YIL105C::chr9_2	YIL105C	SLM1	0.342563	-0.681729	0.227885	0.901324	no	no	no	no
YOR374W::chr15_4	YOR374W	ALD4	0.342391	0.221397	0.228003	0.513567	no	no	no	no
YOR195W::chr15_3	YOR195W	SLK19	0.342066	0.258139	0.228227	0.493199	yes	no	yes	no
YPL057C::chr16_3	YPL057C	SUR1	0.341073	0.0963872	0.228911	0.582286	no	no	no	no
YLR209C::chr12_3	YLR209C	PNP1	0.340559	0.333849	0.229266	0.451344	no	no	no	no
YJL132W::chr10_1	YJL132W	YJL132W	0.339103	0.311375	0.230273	0.463733	no	no	no	no
YGR053C::chr00_14	YGR053C	YGR053C	0.338742	1.05754	0.230522	0.129656	no	no	no	no
YIL015C-A::chr9_1	YIL014C-A	YIL014C-A	0.338225	-0.505113	0.230881	0.851683	no	no	no	no
YOR321W::chr15_4	YOR321W	PMT3	0.338215	0.338215	0.230888	0.448943	yes	yes	yes	yes
YPL080C::chr16_3	YPL080C	YPL080C	0.338215	-0.573777	0.230888	0.87267	yes	no	yes	no
YNL233W::chr14_2	YNL233W	BNI4	0.337822	-0.242944	0.231161	0.751536	no	no	no	no
YER129W::chr00_5	YER129W	SAK1	0.337733	0.840588	0.231222	0.204259	no	no	no	no
YGR086C::chr00_14	YGR086C	PIL1	0.336876	-0.0415508	0.231817	0.655217	no	no	no	no
YPL156C::chr16_2	YPL156C	PRM4	0.335996	0.527319	0.232429	0.347847	no	no	no	no
YJL003W::chr00_13	YJL003W	COX16	0.335837	-2.54031	0.23254	0.999946	no	no	no	no
YBR284W::chr00_1	YBR284W	YBR284W	0.335807	0.571395	0.232561	0.325492	no	no	no	no
YLL006W::chr12_1	YLL006W	MMM1	0.335422	0.658398	0.232829	0.283219	no	no	no	no
YGR275W::chr00_3	YGR275W	RTT102	0.335008	0.574028	0.233117	0.324176	no	yes	no	yes
YGR011W::chr7_3/chr00_12	YGR011W	YGR011W	0.334587	0.105444	0.23341	0.577366	no	no	no	no
YNL104C::chr00_16b	YNL104C	LEU4	0.334469	0.342152	0.233493	0.446778	no	no	no	no
YKR028W::chr00_14	YKR028W	SAP190	0.333713	-0.86231	0.23402	0.938231	yes	no	yes	no
YLR077W::chr12_2	YLR077W	FMP25	0.332919	0.00203859	0.234576	0.632645	no	no	no	no
YML022W::chr00_11	YML022W	APT1	0.332868	1.26917	0.234611	0.0774943	no	yes	no	yes
YNR006W::chr14_4	YNR006W	VPS27	0.332644	2.70004	0.234768	0.000324021	no	yes	no	yes
YOL099C::chr00_6	YOL099C	YOL099C	0.332362	-0.0853684	0.234965	0.677364	no	no	no	no
YJR154W::chr10_4	YJR154W	YJR154W	0.332237	0.580204	0.235053	0.321096	no	no	no	no
YMR219W::chr13_4	YMR219W	ESC1	0.332167	0.702678	0.235102	0.262765	no	no	no	no
YMR109W::chr00_9	YMR109W	MYO5	0.33158	-0.171361	0.235513	0.718992	no	no	no	no
YPR197C::chr16_5	YPR197C	YPR197C	0.331083	0.325428	0.235861	0.455981	no	no	no	no
YDR368W::chr4_7	YDR368W	YPR1	0.330858	0.099485	0.236019	0.580605	no	no	no	no
YBR268W::chr2_4	YBR268W	MRPL37	0.330736	-0.822823	0.236105	0.931257	no	no	no	no
YJL150W::chr10_1	YJL150W	YJL150W	0.330132	-0.0596541	0.236529	0.664437	no	no	no	no
YOR118W::chr15_2	YOR118W	RTC5	0.330054	0.0843509	0.236584	0.588806	no	no	no	no
YNR064C::chr00_4	YNR064C	YNR064C	0.329981	0.168097	0.236635	0.543037	no	no	no	no
YGR023W::chr7_3	YGR023W	MTL1	0.329707	0.136127	0.236828	0.560611	no	no	no	no
YHR204W::chr8_3	YHR204W	MNL1	0.329198	0.329198	0.237186	0.453905	yes	yes	yes	yes
YPR106W::chr16_5	YPR106W	ISR1	0.329109	1.05291	0.237249	0.131022	no	no	no	no
YCR008W::chr3_1	YCR008W	SAT4	0.329032	0.783275	0.237302	0.227576	no	yes	no	yes
YPR140W::chr16_5	YPR140W	TAZ1	0.328889	-1.31067	0.237403	0.984737	no	no	no	no
YLR408C::chr12_5	YLR408C	BLS1	0.32813	0.68912	0.237938	0.268946	no	no	no	no
YLL009C::chr12_1	YLL009C	COX17	0.328028	-1.0327	0.238009	0.962208	no	no	no	no
YFR008W::chr6_1	YFR008W	FAR7	0.327015	0.149281	0.238724	0.553392	no	no	no	no
YOR082C::chr15_1	YOR082C	YOR082C	0.326786	-0.658372	0.238886	0.895563	no	no	no	no
YPL138C::chr16_2	YPL138C	SPP1	0.326724	-0.217097	0.23893	0.740021	no	no	no	no
YJR024C::chr00_13	YJR024C	MDE1	0.326547	0.0147719	0.239055	0.62596	no	no	no	no
YJL201W::chr10_1	YJL201W	ECM25	0.326423	0.190041	0.239143	0.530923	no	no	no	no
YPL157W::chr16_2	YPL157W	TGS1	0.326361	0.523708	0.239186	0.349703	no	no	no	no
YGL217C::chr7_3/chr00_12	YGL217C	YGL217C	0.325472	0.107019	0.239815	0.576509	no	no	no	no
YNL144C::chr14_3	YNL144C	YNL144C	0.325373	0.802948	0.239885	0.219408	no	yes	no	yes
YKR051W::chr11_3	YKR051W	YKR051W	0.32517	-0.127529	0.240029	0.698096	no	no	no	no
YDR345C::chr4_7	YDR345C	HXT3	0.32514	0.222011	0.24005	0.513227	no	no	no	no
YOR255W::chr15_3	YOR255W	OSW1	0.325101	-0.0227268	0.240078	0.645532	no	no	no	no
YPL081W::chr16_3	YPL081W	RPS9A	0.325076	-0.0696939	0.240096	0.669509	no	no	no	no
YGL205W::chr7_3	YGL205W	POX1	0.324413	-0.226074	0.240566	0.744051	no	no	no	no
YPL170W::chr16_2	YPL170W	DAP1	0.32441	1.62629	0.240567	0.0275282	no	no	no	no
YLL005C::chr12_1	YLL005C	SPO75	0.324376	0.274465	0.240592	0.484152	no	no	no	no
YBR221C::chr2_4	YBR221C	PDB1	0.324336	-1.83246	0.24062	0.998064	no	no	no	no
YDR423C::chr4_7	YDR423C	CAD1	0.324301	0.892156	0.240645	0.184547	no	no	no	no
YOR134W::chr15_2	YOR134W	BAG7	0.323668	0.164802	0.241094	0.544853	no	no	no	no
YDR349C::chr4_7	YDR349C	YPS7	0.323433	-1.18556	0.241261	0.976667	no	no	no	no
YNL096C::chr00_18	YNL096C	RPS7B	0.322639	-0.1369	0.241825	0.702622	no	no	no	no
YDR529C::chr4_8	YDR529C	QCR7	0.32258	0.0716222	0.241867	0.595673	no	no	no	no
YKR105C::chr00_4	YKR105C	VBA5	0.322509	0.447292	0.241917	0.389769	no	no	no	no
YDR281C::chr4_6	YDR281C	PHM6	0.322283	0.301801	0.242079	0.469023	no	no	no	no
YDL086W::chr4_1	YDL086W	YDL086W	0.321445	0.246762	0.242675	0.499507	no	no	no	no
YIR042C::chr00_3	YIR042C	YIR042C	0.321351	1.35341	0.242742	0.0618773	no	no	no	no
YOR359W::chr15_4	YOR359W	VTS1	0.320132	0.842736	0.243612	0.203414	no	no	no	no
YLR185W::chr12_3	YLR185W	RPL37A	0.320083	-0.500689	0.243646	0.850256	no	no	no	no
YBR018C::chr2_2	YBR018C	GAL7	0.319903	0.374809	0.243775	0.428895	no	no	no	no
YFR039C::chr00_14	YFR039C	YFR039C	0.31987	-0.219149	0.243799	0.740945	no	no	no	no
YBL095W::chr2_2	YBL095W	YBL095W	0.319797	0.677986	0.243851	0.274077	no	no	no	no
YFR053C::chr00_2	YFR053C	HXK1	0.319587	0.169226	0.244001	0.542414	no	no	no	no
YHR127W::chr00_10	YHR127W	YHR127W	0.3185	0.474895	0.244779	0.375135	no	no	no	no
YJR008W::chr00_13	YJR008W	MHO1	0.318294	1.94882	0.244925	0.00897456	no	no	no	no
YNL069C::chr00_18	YNL069C	RPL16B	0.317921	2.18671	0.245193	0.00349547	no	yes	no	yes
YLR084C::chr12_2	YLR084C	RAX2	0.317853	0.683623	0.245242	0.271473	no	no	no	no
YAR015W::chr1_1	YAR015W	ADE1	0.317667	-0.560356	0.245375	0.86874	no	no	no	no
YLR123C::chr12_2	YLR123C	YLR123C	0.317383	0.37027	0.245578	0.431372	no	no	no	no
YER060W-A::chr5_3	YER060W-A	FCY22	0.317352	0.840626	0.245601	0.204244	no	no	no	no
YMR111C::chr00_9	YMR111C	YMR111C	0.317296	3.02441	0.24564	5.63546e-05	no	yes	no	yes
YLR193C::chr12_3	YLR193C	UPS1	0.317143	0.310938	0.24575	0.463974	no	no	no	no
YGR058W::chr7_4	YGR058W	PEF1	0.316931	-0.158179	0.245903	0.712781	no	no	no	no
YAR028W::chr1_1	YAR028W	YAR028W	0.316875	0.788102	0.245942	0.225556	no	no	no	no
YMR072W::chr00_6	YMR072W	ABF2	0.316226	-0.604489	0.246409	0.881355	yes	no	yes	no
YHR194W::chr00_10	YHR194W	MDM31	0.315943	1.10387	0.246612	0.116551	no	no	no	no
YNL300W::chr00_8	YNL300W	TOS6	0.315566	0.315566	0.246883	0.46142	yes	yes	yes	yes
YGL222C::chr7_3	YGL222C	EDC1	0.31516	0.453651	0.247175	0.386383	no	no	no	no
YGL260W::chr7_3	YGL260W	YGL260W	0.314743	0.604206	0.247475	0.309244	no	no	no	no
YDR078C::chr4_4	YDR078C	SHU2	0.314655	0.746623	0.247539	0.24324	no	no	no	no
YDR444W::chr00_17a	YDR444W	YDR444W	0.314133	0.74184	0.247915	0.245327	no	no	no	no
YFR048W::chr00_2	YFR048W	RMD8	0.314056	0.48571	0.24797	0.369449	no	no	no	no
YBL024W::chr2_1	YBL024W	NCL1	0.312938	1.54511	0.248776	0.0354889	no	yes	no	yes
YGL167C::chr7_2	YGL167C	PMR1	0.312938	-0.983766	0.248776	0.956264	no	no	no	no
YBR022W::chr2_2	YBR022W	POA1	0.311327	1.5897	0.249941	0.0309106	no	no	no	no
YAL065C::chr1_1	YAL065C	YAL065C	0.311234	0.387422	0.250009	0.422024	no	no	no	no
YER092W::chr00_8	YER092W	IES5	0.310993	0.310993	0.250183	0.463944	yes	yes	yes	yes
YBR183W::chr2_4	YBR183W	YPC1	0.310744	1.31557	0.250363	0.0685597	no	yes	no	yes
YHR082C::chr8_2	YHR082C	KSP1	0.310217	1.73632	0.250745	0.0191633	no	no	no	no
YAL055W::chr1_1	YAL055W	PEX22	0.31009	0.442302	0.250838	0.392431	no	no	no	no
YKL053C-A::chr00_17b	YKL053C-A	MDM35	0.309647	-0.35086	0.251159	0.796535	no	no	no	no
YDR494W::chr4_8	YDR494W	RSM28	0.309374	0.484313	0.251357	0.370182	no	no	no	no
YBR062C::chr2_2	YBR062C	YBR062C	0.308765	0.0654676	0.251799	0.598983	no	no	no	no
YOR271C::chr00_17b	YOR271C	FSF1	0.30822	0.714242	0.252196	0.257551	no	no	no	no
YDR424C::chr00_8	YDR424C	DYN2	0.308096	0.212341	0.252286	0.518584	no	no	no	no
YER179W::chr00_5	YER179W	DMC1	0.308056	0.184991	0.252315	0.533714	no	no	no	no
YGR159C::chr7_5	YGR159C	NSR1	0.307509	0.0608523	0.252713	0.601461	yes	no	yes	no
YOL023W::chr15_5	YOL023W	IFM1	0.307401	0.79838	0.252791	0.221289	no	no	no	no
YBR163W::chr2_3	YBR163W	EXO5	0.306846	-0.332197	0.253196	0.789119	no	no	no	no
YKL116C::chr11_2	YKL116C	PRR1	0.306406	-0.126822	0.253517	0.697754	yes	no	yes	no
YKR030W::chr11_3	YKR030W	GMH1	0.305683	0.708844	0.254044	0.259978	no	no	no	no
YBR245C::chr2_4	YBR245C	ISW1	0.305107	0.531789	0.254465	0.345554	no	no	no	no
YJR049C::chr00_13	YJR049C	UTR1	0.304217	-0.735455	0.255116	0.913684	no	no	no	no
YNR069C::chr00_15	YNR069C	BSC5	0.303631	-0.461136	0.255544	0.837088	no	no	no	no
YHL006C::chr8_1	YHL006C	SHU1	0.303508	0.751257	0.255634	0.241228	no	no	no	no
YOR350C::chr15_4	YOR350C	MNE1	0.303381	0.120886	0.255728	0.568949	no	no	no	no
YPR090W::chr16_4	YPR089W	YPR089W	0.303069	0.615851	0.255956	0.303564	no	no	no	no
YOL054W::chr15_5	YOL054W	PSH1	0.303037	0.672581	0.25598	0.276585	no	no	no	no
YLR070C::chr12_2	YLR070C	XYL2	0.302886	0.720407	0.256091	0.254792	no	no	no	no
YKL110C::chr11_2	YKL110C	KTI12	0.302845	-0.489392	0.25612	0.84657	no	no	no	no
YBL043W::chr2_1	YBL043W	ECM13	0.302468	0.185289	0.256397	0.533549	no	no	no	no
YLR111W::chr12_2	YLR111W	YLR111W	0.301995	1.13534	0.256744	0.108204	no	no	no	no
YDR253C::chr4_6	YDR253C	MET32	0.301804	0.301804	0.256884	0.469021	yes	yes	yes	yes
YLR233C::chr12_4	YLR233C	EST1	0.301242	0.945786	0.257297	0.165351	no	no	no	no
YLR210W::chr12_3	YLR210W	CLB4	0.301209	2.00559	0.257321	0.00723119	no	no	no	no
YMR214W::chr13_4	YMR214W	SCJ1	0.301173	-1.11446	0.257348	0.970656	no	no	no	no
YLR342W::chr12_5	YLR342W	FKS1	0.300717	-3.41453	0.257683	1	no	no	no	no
YJL163C::chr00_14	YJL163C	YJL163C	0.300323	1.4233	0.257973	0.0508861	no	yes	no	yes
YDR418W::chr4_7	YDR418W	RPL12B	0.298575	0.081625	0.259261	0.590279	no	no	no	no
YPL022W::chr16_3	YPL022W	RAD1	0.298171	0.839692	0.259559	0.204612	no	no	no	no
YLR206W::chr12_3	YLR206W	ENT2	0.297712	0.948396	0.259898	0.16445	no	no	no	no
YNL080C::chr00_16b	YNL080C	EOS1	0.297187	-2.58699	0.260286	0.999959	yes	no	yes	no
YLR050C::chr00_8	YLR050C	YLR050C	0.296875	0.957156	0.260517	0.161453	no	no	no	no
YPR192W::chr16_5	YPR192W	AQY1	0.296768	0.620667	0.260596	0.301229	no	yes	no	yes
YOR323C::chr15_4	YOR323C	PRO2	0.295975	0.205511	0.261183	0.522365	no	no	no	no
YLL010C::chr12_1	YLL010C	PSR1	0.295375	0.347185	0.261628	0.444014	no	no	no	no
YGR162W::chr00_17a	YGR162W	TIF4631	0.294686	3.53297	0.262139	2.45919e-06	no	no	no	yes
YJL043W::chr10_2	YJL043W	YJL043W	0.294619	0.289359	0.262188	0.475904	no	no	no	no
YPL084W::chr16_3	YPL084W	BRO1	0.294452	0.547061	0.262312	0.337763	no	yes	no	yes
YNL023C::chr14_4	YNL023C	FAP1	0.293662	0.826379	0.262899	0.209903	no	no	no	no
YNL180C::chr14_2	YNL180C	RHO5	0.29268	1.20039	0.263629	0.0923317	no	no	no	no
YLR371W::chr12_5	YLR371W	ROM2	0.292522	0.174683	0.263747	0.539405	no	no	no	no
YBR063C::chr2_2	YBR063C	YBR063C	0.292139	0.268728	0.264032	0.48733	no	no	no	no
YKL015W::chr11_1	YKL015W	PUT3	0.292025	0.241585	0.264117	0.502377	no	no	no	no
YIL005W::chr9_1	YIL005W	EPS1	0.29148	0.974574	0.264523	0.155599	no	no	no	no
YLR407W::chr12_5	YLR407W	YLR407W	0.29129	0.476041	0.264665	0.374531	no	no	no	no
YDR409W::chr4_7	YDR409W	SIZ1	0.291089	0.488905	0.264814	0.367774	no	no	no	no
YDL184C::chr4_2	YDL184C	RPL41A	0.291044	-0.293429	0.264848	0.77322	no	no	no	no
YNL055C::chr00_18	YNL055C	POR1	0.290462	-1.80824	0.265283	0.997846	no	no	no	no
YDR386W::chr4_7	YDR386W	MUS81	0.290441	0.396272	0.265298	0.417217	no	no	no	no
YLR264W::chr12_4	YLR264W	RPS28B	0.290394	1.79032	0.265333	0.0159207	no	no	no	no
YJL121C::chr10_2	YJL121C	RPE1	0.290303	0.946751	0.265401	0.165017	no	no	no	no
YDR372C::chr4_7	YDR372C	VPS74	0.290064	0.633453	0.26558	0.295068	no	no	no	no
YPR164W::chr16_5	YPR164W	MMS1	0.289908	0.23361	0.265697	0.506798	no	no	no	no
YDL240W::chr4_3	YDL240W	LRG1	0.289376	0.368129	0.266094	0.432542	no	no	no	no
YMR254C::chr13_5	YMR254C	YMR254C	0.28909	0.189844	0.266308	0.531032	no	no	no	no
YLR390W::chr12_5	YLR390W	ECM19	0.288831	0.31164	0.266502	0.463587	no	no	no	no
YHR038W::chr8_1	YHR038W	RRF1	0.28791	-0.461651	0.267192	0.837265	yes	no	yes	no
YML095C::chr00_9	YML095C	RAD10	0.28791	0.28791	0.267192	0.476706	yes	yes	yes	yes
YPL260W::chr16_1	YPL260W	YPL260W	0.28791	0.28791	0.267192	0.476706	yes	yes	yes	yes
YER111C::chr00_5	YER111C	SWI4	0.287753	0.60109	0.267309	0.310772	no	no	no	no
YER109C::chr00_5	YER109C	FLO8	0.28706	2.14107	0.267828	0.00422122	no	yes	no	yes
YHR159W::chr8_3	YHR159W	TDA11	0.28633	0.511631	0.268376	0.355938	no	yes	no	yes
YGL114W::chr7_2	YGL114W	YGL114W	0.285491	0.185269	0.269007	0.533561	no	no	no	no
YJR073C::chr10_4	YJR073C	OPI3	0.285431	-0.198973	0.269052	0.731785	no	no	no	no
YHR184W::chr8_3	YHR184W	SSP1	0.285371	0.786663	0.269097	0.226157	no	no	no	no
YOR251C::chr15_3	YOR251C	TUM1	0.285278	0.173223	0.269167	0.540211	no	no	no	no
YOL163W::chr00_10	YOL163W	YOL163W	0.285166	0.208042	0.269251	0.520964	no	no	no	no
YML083C::chr13_1b	YML083C	YML083C	0.284593	0.434464	0.269682	0.396624	no	no	no	no
YNR034W::chr14_4	YNR034W	SOL1	0.284036	1.21515	0.270102	0.088981	no	no	no	no
YHR037W::chr8_1	YHR037W	PUT2	0.284018	0.545772	0.270115	0.338418	no	no	no	no
YOR227W::chr15_3	YOR227W	HER1	0.283618	0.973115	0.270417	0.156084	no	no	no	no
YGL253W::chr7_3	YGL253W	HXK2	0.282838	0.00492398	0.271005	0.631134	no	no	no	no
YNL063W::chr14_3	YNL063W	MTQ1	0.282558	0.65203	0.271216	0.286222	no	yes	no	yes
YLR343W::chr00_12	YLR343W	GAS2	0.281289	0.183614	0.272175	0.534475	no	no	no	no
YBL056W::chr2_1	YBL056W	PTC3	0.281	0.175819	0.272394	0.538778	no	no	no	no
YBL094C::chr2_1	YBL094C	YBL094C	0.280529	0.0798289	0.27275	0.591249	no	no	no	no
YAR003W::chr1_1	YAR003W	SWD1	0.279337	0.730605	0.273653	0.250265	no	no	no	no
YEL030W::chr5_2	YEL030W	ECM10	0.27806	-0.0376308	0.274622	0.653209	no	no	no	no
YMR121C::chr00_9	YMR121C	RPL15B	0.278033	0.520264	0.274643	0.351477	no	no	no	no
YGR057C::chr7_4	YGR057C	LST7	0.277704	1.41036	0.274893	0.052794	no	no	no	no
YKL157W::chr11_2	YKL157W	APE2	0.277389	0.0364654	0.275133	0.614483	no	no	no	no
YLR028C::chr12_1	YLR028C	ADE16	0.276255	1.96015	0.275995	0.00859972	no	yes	no	yes
YOR220W::chr15_3	YOR220W	RCN2	0.276092	-1.07768	0.276119	0.967072	no	no	no	no
YKR069W::chr00_3	YKR069W	MET1	0.276063	0.679049	0.276142	0.273585	no	no	no	no
YJR118C::chr00_12	YJR118C	ILM1	0.275932	-2.00293	0.276242	0.999112	no	no	no	no
YLR453C::chr00_4	YLR453C	RIF2	0.275788	0.508569	0.276351	0.357525	no	no	no	no
YNR024W::chr14_4	YNR024W	MPP6	0.275315	1.37592	0.276712	0.0581517	no	yes	no	yes
YBR172C::chr2_3	YBR172C	SMY2	0.274648	0.123271	0.27722	0.567646	no	no	no	no
YFR014C::chr6_1	YFR014C	CMK1	0.27388	0.27388	0.277807	0.484476	yes	yes	yes	yes
YMR105C::chr00_9	YMR105C	PGM2	0.27388	0.27388	0.277807	0.484476	yes	yes	yes	yes
YHR086W::chr8_2	YHR086W	NAM8	0.273525	0.177646	0.278078	0.53777	no	no	no	no
YGL109W::chr7_2	YGL109W	YGL109W	0.272896	0.619277	0.278559	0.301902	no	no	no	no
YMR086W::chr00_6	YMR086W	SEG1	0.272738	1.13243	0.278679	0.108957	no	no	no	no
YCR037C::chr00_1	YCR037C	PHO87	0.272735	-0.105692	0.278682	0.687432	no	no	no	no
YBL002W::chr2_1	YBL002W	HTB2	0.272725	1.43964	0.27869	0.0485538	no	no	no	no
YIL069C::chr9_1	YIL069C	RPS24B	0.272053	0.293425	0.279204	0.473655	no	no	no	no
YOR155C::chr15_2	YOR155C	ISN1	0.271594	0.234461	0.279556	0.506326	no	no	no	no
YER077C::chr00_8	YER077C	YER077C	0.270753	-0.534901	0.280201	0.861056	no	no	no	no
YOR229W::chr15_3	YOR229W	WTM2	0.270399	-0.0528606	0.280472	0.660989	no	no	no	no
YHR067W::chr00_10	YHR067W	HTD2	0.270335	-0.837196	0.280521	0.933863	no	no	no	no
YLR018C::chr12_1	YLR018C	POM34	0.270139	-0.479488	0.280672	0.843289	no	no	no	no
YGR126W::chr7_5	YGR126W	YGR126W	0.270042	-0.624737	0.280746	0.886847	no	no	no	no
YCL028W::chr3_1	YCL028W	RNQ1	0.269831	0.474275	0.280908	0.375462	no	no	no	no
YDR457W::chr4_8	YDR457W	TOM1	0.268101	2.55802	0.282239	0.000656082	no	no	no	yes
YCL042W::chr3_1	YCL042W	YCL042W	0.267649	0.377407	0.282586	0.427477	no	no	no	no
YDR486C::chr4_8	YDR486C	VPS60	0.26693	2.51483	0.283141	0.000807238	no	no	no	yes
YIL043C::chr9_1	YIL043C	CBR1	0.266754	0.64707	0.283276	0.288571	no	no	no	no
YBR028C::chr2_2	YBR028C	YPK3	0.26637	0.980212	0.283572	0.153735	no	no	no	no
YGR199W::chr7_5	YGR199W	PMT6	0.265948	0.208751	0.283898	0.520572	no	no	no	no
YDL133W::chr4_2	YDL133W	SRF1	0.26565	1.85336	0.284128	0.0127415	no	no	no	no
YER183C::chr00_5	YER183C	FAU1	0.265172	0.865193	0.284497	0.194702	no	no	no	no
YAL031C::chr1_1	YAL031C	GIP4	0.265141	0.157491	0.284522	0.548878	no	no	no	no
YER158C::chr00_5	YER158C	YER158C	0.264731	0.252024	0.284839	0.496589	no	no	no	no
YBR175W::chr2_4	YBR175W	SWD3	0.264518	0.119157	0.285003	0.569893	no	no	no	no
YCL033C::chr3_1	YCL033C	MXR2	0.263959	0.15564	0.285435	0.549897	no	no	no	no
YFL047W::chr6_1	YFL047W	RGD2	0.263824	-0.618821	0.28554	0.885261	no	no	no	no
YLR303W::chr12_4	YLR303W	MET17	0.263619	1.40765	0.285698	0.0532005	no	no	no	no
YBR040W::chr2_2	YBR040W	FIG1	0.261027	0.366701	0.287709	0.433323	no	no	no	no
YDL114W::chr4_2	YDL114W	YDL114W	0.260999	0.162509	0.28773	0.546115	no	no	no	no
YOL092W::chr00_6	YOL092W	YOL092W	0.260454	0.570826	0.288154	0.325777	no	no	no	no
YLR257W::chr12_4	YLR257W	YLR257W	0.260164	0.0891718	0.28838	0.586197	no	no	no	no
YDR420W::chr4_7	YDR420W	HKR1	0.259713	0.0527603	0.288731	0.605795	yes	no	yes	no
YML013C-A::chr13_2	YML012C-A	YML012C-A	0.259713	0.259713	0.288731	0.492327	yes	yes	yes	yes
YGR219W::chr00_2	YGR219W	YGR219W	0.259458	-0.938827	0.288929	0.950163	no	no	no	no
YJR097W::chr00_12	YJR097W	JJJ3	0.259353	1.71943	0.289011	0.0202862	no	no	no	no
YNL146W::chr14_3	YNL146W	YNL146W	0.258486	0.108819	0.289686	0.575529	no	no	no	no
YNL295W::chr14_1	YNL295W	YNL295W	0.258478	1.0421	0.289693	0.134244	no	no	no	no
YEL014C::chr5_2	YEL014C	YEL014C	0.258065	0.355643	0.290014	0.439375	no	no	no	no
YBL098W::chr2_2	YBL098W	BNA4	0.257613	0.927313	0.290367	0.171811	no	no	no	no
YGL110C::chr7_2	YGL110C	CUE3	0.256733	-0.275834	0.291054	0.765786	no	no	no	no
YEL005C::chr5_2	YEL005C	VAB2	0.256364	0.686546	0.291343	0.270128	no	no	no	no
YKR077W::chr00_3	YKR077W	MSA2	0.256308	0.449916	0.291386	0.38837	no	no	no	no
YDR436W::chr4_7	YDR436W	PPZ2	0.2559	0.581495	0.291705	0.320453	no	no	no	no
YOL057W::chr15_5	YOL057W	YOL057W	0.255517	1.01123	0.292004	0.143744	no	no	no	no
YPR076W::chr16_4	YPR076W	YPR076W	0.255115	-0.327222	0.292319	0.787116	no	no	no	no
YKR050W::chr11_3	YKR050W	TRK2	0.254962	0.812669	0.292439	0.215435	no	no	no	no
YCR001W::chr3_1	YCR001W	YCR001W	0.254959	0.254959	0.292441	0.494962	yes	yes	yes	yes
YGL071W::chr7_1	YGL071W	AFT1	0.254069	0.254069	0.293138	0.495455	yes	yes	yes	yes
YHR031C::chr8_1	YHR031C	RRM3	0.253881	-0.632085	0.293286	0.888794	no	no	no	no
YGL175C::chr7_2	YGL175C	SAE2	0.253859	1.1277	0.293303	0.11019	no	no	no	no
YMR062C::chr00_6	YMR062C	ARG7	0.253815	0.993298	0.293337	0.149464	no	no	no	no
YGR171C::chr7_5	YGR171C	MSM1	0.253711	-0.40291	0.293419	0.816377	no	no	no	no
YGR247W::chr00_2	YGR247W	CPD1	0.253473	0.0325599	0.293606	0.616557	no	no	no	no
YNL199C::chr14_2	YNL199C	GCR2	0.253469	0.806201	0.293609	0.218074	no	yes	no	yes
YNR021W::chr14_4	YNR021W	YNR021W	0.252581	0.314858	0.294305	0.461811	no	no	no	no
YIL052C::chr9_1	YIL052C	RPL34B	0.252135	-2.02166	0.294655	0.999187	no	no	no	no
YJL209W::chr10_1	YJL209W	CBP1	0.251409	-0.187139	0.295226	0.726338	no	no	no	no
YMR052C-A::chr00_5	YMR052C-A	YMR052C-A	0.251366	-0.0256484	0.29526	0.647041	no	no	no	no
YBR069C::chr2_2	YBR069C	TAT1	0.251175	1.24627	0.29541	0.0822184	no	no	no	no
YIR002C::chr9_2	YIR002C	MPH1	0.25103	-0.384617	0.295524	0.809545	no	no	no	no
YOR078W::chr15_1	YOR078W	BUD21	0.250802	-0.623046	0.295704	0.886395	no	no	no	no
YLR253W::chr12_4	YLR253W	YLR253W	0.250255	0.0861417	0.296134	0.587837	no	no	no	no
YLR335W::chr12_5	YLR335W	NUP2	0.250137	2.23987	0.296227	0.00279286	no	no	no	no
YOL085C::chr15_5	YOL085C	YOL085C	0.250119	0.099481	0.296241	0.580607	no	no	no	no
YKL086W::chr11_1	YKL086W	SRX1	0.24996	-0.0525875	0.296367	0.66085	no	no	no	no
YIL088C::chr9_1	YIL088C	AVT7	0.249265	-0.522857	0.296914	0.857316	no	no	no	no
YML035C::chr00_14	YML035C	AMD1	0.24888	0.722592	0.297218	0.253819	no	yes	no	yes
YLR246W::chr00_11	YLR246W	ERF2	0.248872	-0.27994	0.297224	0.767533	no	no	no	no
YJL122W::chr10_2	YJL122W	ALB1	0.248268	0.959973	0.297701	0.160496	no	no	no	no
YJL133W::chr10_1	YJL133W	MRS3	0.248047	0.198268	0.297875	0.526374	no	no	no	no
YBR272C::chr00_16a	YBR272C	HSM3	0.24643	-0.165109	0.299153	0.716054	no	no	no	no
YCL030C::chr3_1	YCL030C	HIS4	0.246409	0.203457	0.299169	0.523503	no	no	no	no
YBR014C::chr2_2	YBR014C	GRX7	0.246262	0.381111	0.299286	0.425459	no	no	no	no
YGL084C::chr7_1	YGL084C	GUP1	0.246213	0.188279	0.299325	0.531897	no	no	no	no
YDR399W::chr4_7	YDR399W	HPT1	0.245405	0.245405	0.299964	0.500259	yes	yes	yes	yes
YBL006C::chr2_1	YBL006C	LDB7	0.24506	1.31785	0.300238	0.0681418	no	yes	no	yes
YGR104C::chr7_4	YGR104C	SRB5	0.244967	0.244967	0.300311	0.500502	yes	yes	yes	yes
YBR147W::chr2_3	YBR147W	RTC2	0.244482	0.274801	0.300696	0.483966	no	no	no	no
YLR130C::chr12_3	YLR130C	ZRT2	0.244186	-0.163499	0.300931	0.715295	no	no	no	no
YDL134C-A::chr4_2	YDL133C-A	RPL41B	0.243989	-0.60893	0.301087	0.882575	no	no	no	no
YIR029W::chr00_3	YIR029W	DAL2	0.242835	0.640077	0.302003	0.291899	no	no	no	no
YBR267W::chr2_4	YBR267W	REI1	0.24271	1.57418	0.302102	0.032445	no	yes	no	yes
YGL220W::chr7_3	YGL220W	FRA2	0.242607	0.951364	0.302184	0.163431	no	yes	no	yes
YLR203C::chr12_3	YLR203C	MSS51	0.241621	-1.2015	0.302968	0.977863	no	no	no	no
YBL044W::chr2_1	YBL044W	YBL044W	0.241198	0.411818	0.303304	0.408804	no	no	no	no
YDL121C::chr4_2	YDL121C	YDL121C	0.241082	0.0825597	0.303397	0.589774	no	no	no	no
YBL071C::chr2_1	YBL071C	YBL071C	0.240822	0.292028	0.303604	0.474427	no	no	no	no
YDR229W::chr4_5	YDR229W	IVY1	0.240137	0.093125	0.304149	0.584056	no	no	no	no
YBR012C::chr2_2	YBR012C	YBR012C	0.2399	0.297742	0.304339	0.471267	no	no	no	no
YDL239C::chr4_3	YDL239C	ADY3	0.239627	-0.0633859	0.304557	0.666326	no	no	no	no
YDR150W::chr4_5	YDR150W	NUM1	0.239625	-1.65989	0.304558	0.995958	no	no	no	no
YIL060W::chr9_1	YIL060W	YIL060W	0.238969	-0.955839	0.305081	0.952548	no	no	no	no
YJR129C::chr10_4	YJR129C	YJR129C	0.237636	-0.50506	0.306146	0.851666	no	no	no	no
YER065C::chr5_3	YER065C	ICL1	0.237583	-0.0758087	0.306188	0.672582	no	no	no	no
YML003W::chr13_2	YML003W	YML003W	0.236943	0.640047	0.3067	0.291913	no	no	no	no
YAR027W::chr1_1	YAR027W	UIP3	0.236252	0.388341	0.307252	0.421524	no	no	no	no
YMR273C::chr13_5	YMR273C	ZDS1	0.235932	0.0561962	0.307509	0.603957	no	no	no	no
YJL062W::chr10_2	YJL062W	LAS21	0.235787	-2.42415	0.307625	0.999897	yes	no	yes	no
YLR306W::chr12_4	YLR306W	UBC12	0.235529	0.207109	0.307832	0.521481	no	no	no	no
YGR018C::chr7_3/chr00_12	YGR018C	YGR018C	0.235496	1.17139	0.307858	0.0991807	no	no	no	no
YKL207W::chr11_3	YKL207W	EMC3	0.2354	-0.584372	0.307935	0.875715	no	no	no	no
YMR017W::chr13_2	YMR017W	SPO20	0.235336	1.18163	0.307986	0.0967211	no	no	no	no
YKR024C::chr11_3	YKR024C	DBP7	0.235139	0.315566	0.308145	0.46142	no	yes	no	yes
YPR120C::chr16_5	YPR120C	CLB5	0.235083	-1.55194	0.308189	0.993764	no	no	no	no
YDR370C::chr4_7	YDR370C	YDR370C	0.234728	0.351324	0.308474	0.441743	no	no	no	no
YLR292C::chr12_4	YLR292C	SEC72	0.234296	-0.836687	0.308821	0.933772	no	no	no	no
YMR136W::chr00_12	YMR136W	GAT2	0.233108	0.0323243	0.309774	0.616682	no	no	no	no
YKR009C::chr11_3	YKR009C	FOX2	0.232602	0.015034	0.310181	0.625822	no	no	no	no
YDR471W::chr4_8	YDR471W	RPL27B	0.23237	0.995024	0.310368	0.148907	no	no	no	no
YEL017C-A::chr5_2	YEL017C-A	PMP2	0.232266	-0.0439356	0.310451	0.656437	no	no	no	no
YOL131W::chr00_6	YOL131W	YOL131W	0.231696	-0.0534798	0.310909	0.661304	no	no	no	no
YBR073W::chr2_2	YBR073W	RDH54	0.231534	1.07199	0.31104	0.125464	no	no	no	no
YKR020W::chr11_3	YKR020W	VPS51	0.230954	-2.00029	0.311507	0.999101	yes	no	yes	no
YNL105W::chr00_16b	YNL105W	RRT16	0.230954	0.230954	0.311507	0.508271	yes	yes	yes	yes
YNL082W::chr00_16b	YNL082W	PMS1	0.230347	1.19169	0.311996	0.0943468	no	yes	no	yes
YOR356W::chr15_4	YOR356W	CIR2	0.229873	0.50447	0.312378	0.359653	no	no	no	no
YKR103W::chr00_4	YKR103W	NFT1	0.229041	0.340508	0.313049	0.447682	no	no	no	no
YLR183C::chr12_3	YLR183C	TOS4	0.229035	0.975247	0.313054	0.155376	no	no	no	no
YPL099C::chr16_2	YPL099C	AIM43	0.228848	1.49785	0.313205	0.0409352	no	no	no	no
YDR159W::chr4_5	YDR159W	SAC3	0.228423	-0.0606318	0.313548	0.664933	no	no	no	no
YJR113C::chr00_12	YJR113C	RSM7	0.228269	-1.41423	0.313673	0.989476	no	no	no	no
YIL036W::chr9_1	YIL036W	CST6	0.228259	-0.0597672	0.313681	0.664495	no	no	no	no
YBR057C::chr2_2	YBR057C	MUM2	0.228071	0.357327	0.313832	0.438452	no	no	no	no
YNL100W::chr00_16b	YNL100W	AIM37	0.22784	0.936598	0.314019	0.168544	no	yes	no	yes
YIL140W::chr9_2	YIL140W	AXL2	0.227577	2.59393	0.314232	0.000550803	no	yes	no	yes
YOL007C::chr15_5	YOL007C	CSI2	0.227407	-0.603853	0.314369	0.881179	no	no	no	no
YJL075C::chr10_2	YJL075C	APQ13	0.226901	1.80537	0.314778	0.0151056	no	yes	no	yes
YML089C::chr13_1b	YML089C	YML089C	0.226764	-0.201439	0.31489	0.732914	no	no	no	no
YDR065W::chr4_4	YDR065W	RRG1	0.226589	-1.54614	0.315031	0.993621	yes	no	yes	no
YKR019C::chr00_14	YKR019C	IRS4	0.226104	0.0410945	0.315423	0.612021	yes	no	yes	no
YGL003C::chr7_1	YGL003C	CDH1	0.224923	0.0840433	0.31638	0.588972	no	no	no	no
YCR098C::chr00_2	YCR098C	GIT1	0.224367	1.37581	0.316831	0.0581694	no	no	no	no
YDR144C::chr4_4	YDR144C	MKC7	0.224342	0.119746	0.316852	0.569572	no	no	no	no
YCR102C::chr00_2	YCR102C	YCR102C	0.223997	1.04372	0.317132	0.133758	no	no	no	no
YOL067C::chr15_5	YOL067C	RTG1	0.223627	0.939074	0.317432	0.16768	no	no	no	no
YPR109W::chr16_5	YPR109W	YPR109W	0.223481	0.00622455	0.317551	0.630452	no	no	no	no
YMR320W::chr00_8	YMR320W	YMR320W	0.223142	0.108794	0.317826	0.575543	no	no	no	no
YML075C::chr00_11	YML075C	HMG1	0.223124	1.03065	0.31784	0.137716	no	no	no	no
YML063W::chr13_1b	YML063W	RPS1B	0.2231	0.69292	0.31786	0.267207	no	no	no	no
YPR184W::chr16_5	YPR184W	GDB1	0.222572	0.252546	0.318289	0.4963	no	no	no	no
YHL009C::chr8_1	YHL009C	YAP3	0.222281	0.776495	0.318525	0.23043	no	no	no	no
YKR034W::chr00_14	YKR034W	DAL80	0.222057	-0.200998	0.318707	0.732712	no	no	no	no
YCR046C::chr00_16a	YCR046C	IMG1	0.220604	-1.35818	0.31989	0.987101	no	no	no	no
YDR476C::chr4_8	YDR476C	YDR476C	0.220485	-0.108913	0.319987	0.689015	no	no	no	no
YOR366W::chr15_4	YOR366W	YOR366W	0.218608	1.99439	0.321517	0.00754948	no	no	no	no
YNL071W::chr00_16b	YNL071W	LAT1	0.218608	-1.54578	0.321517	0.993612	no	no	no	no
YNL005C::chr14_4	YNL005C	MRP7	0.218411	0.475967	0.321679	0.37457	no	no	no	no
YOR178C::chr15_2	YOR178C	GAC1	0.218224	0.0700378	0.321831	0.596526	no	no	no	no
YLR374C::chr12_5	YLR374C	YLR374C	0.218072	-2.61576	0.321955	0.999965	no	no	no	no
YLR341W::chr12_5	YLR341W	SPO77	0.218047	0.285255	0.321976	0.478176	no	no	no	no
YPR099C::chr16_4	YPR099C	YPR099C	0.217311	0.217311	0.322577	0.515831	yes	yes	yes	yes
YOR079C::chr15_1	YOR079C	ATX2	0.216988	0.719917	0.322841	0.255011	no	no	no	no
YOL095C::chr00_6	YOL095C	HMI1	0.215974	-1.51028	0.323671	0.992669	no	no	no	no
YML027W::chr00_11	YML027W	YOX1	0.215346	1.31309	0.324185	0.069015	no	no	no	no
YPR044C::chr16_4	YPR044C	OPI11	0.214968	2.94909	0.324495	8.60526e-05	no	no	no	yes
YLL042C::chr12_1	YLL042C	ATG10	0.214058	-0.399131	0.32524	0.814978	no	no	no	no
YER067C-A::chr5_3	YER067C-A	YER067C-A	0.213917	0.776926	0.325356	0.230248	no	no	no	no
YFR043C::chr00_2	YFR043C	IRC6	0.213914	-0.676809	0.325359	0.90013	no	no	no	no
YLR252W::chr12_4	YLR252W	YLR252W	0.213616	-0.815364	0.325603	0.929874	no	no	no	no
YLR199C::chr12_3	YLR199C	PBA1	0.213528	0.699995	0.325675	0.263982	no	no	no	no
YKR042W::chr11_3	YKR042W	UTH1	0.213519	0.643856	0.325683	0.290098	no	no	no	no
YOR023C::chr15_1	YOR023C	AHC1	0.213456	1.76222	0.325734	0.0175442	no	no	no	no
YMR106C::chr00_9	YMR106C	YKU80	0.213234	-0.149027	0.325917	0.708432	no	no	no	no
YCR082W::chr00_1	YCR082W	AHC2	0.213193	0.905387	0.32595	0.179687	no	no	no	no
YMR002W::chr13_2	YMR002W	MIC17	0.212783	0.295471	0.326287	0.472523	no	no	no	no
YPL171C::chr16_2	YPL171C	OYE3	0.212628	0.28786	0.326414	0.476734	no	no	no	no
YGR163W::chr7_5	YGR163W	GTR2	0.212434	0.662286	0.326573	0.281393	no	yes	no	yes
YER019C-A::chr5_3	YER019C-A	SBH2	0.212278	-0.401566	0.326702	0.81588	no	no	no	no
YGL127C::chr7_2	YGL127C	SOH1	0.212234	0.539744	0.326737	0.341487	no	no	no	no
YFL015C::chr6_1	YFL015C	YFL015C	0.212018	0.562964	0.326915	0.329723	no	no	no	no
YDR155C::chr4_5	YDR155C	CPR1	0.211458	-0.371911	0.327376	0.804709	yes	no	yes	no
YLR372W::chr12_5	YLR372W	SUR4	0.211458	-1.27208	0.327376	0.982552	yes	no	yes	no
YHL046C::chr8_1	YHL046C	PAU13	0.211239	-0.546681	0.327556	0.864649	no	no	no	no
YKL133C::chr11_2	YKL133C	YKL133C	0.210753	0.542413	0.327956	0.340127	no	no	no	no
YHR008C::chr00_10	YHR008C	SOD2	0.210678	-0.900721	0.328018	0.944473	no	no	no	no
YDR218C::chr4_5	YDR218C	SPR28	0.210083	0.178596	0.328508	0.537246	no	no	no	no
YLR204W::chr12_3	YLR204W	QRI5	0.209398	3.10586	0.329071	3.52393e-05	no	yes	no	yes
YNL001W::chr14_4	YNL001W	DOM34	0.20916	0.680652	0.329267	0.272844	no	no	no	no
YMR251W::chr13_5	YMR251W	GTO3	0.208762	0.31543	0.329596	0.461495	no	no	no	no
YCL046W::chr3_1	YCL046W	YCL046W	0.208265	0.0811503	0.330006	0.590535	no	no	no	no
YLR344W::chr12_5	YLR344W	RPL26A	0.208144	1.62465	0.330105	0.0276725	no	yes	no	yes
YDR502C::chr00_17a	YDR502C	SAM2	0.207906	0.0195127	0.330302	0.623461	no	no	no	no
YFL018C::chr6_1	YFL018C	LPD1	0.20768	-1.25629	0.330489	0.981584	no	no	no	no
YPL087W::chr16_3	YPL087W	YDC1	0.206475	1.02108	0.331484	0.140664	no	no	no	no
YBR098W::chr2_3	YBR098W	MMS4	0.206349	0.847836	0.331588	0.201415	no	yes	no	yes
YOR150W::chr15_2	YOR150W	MRPL23	0.205716	-1.35709	0.332112	0.98705	no	no	no	no
YHR009C::chr00_10	YHR009C	TDA3	0.205317	1.63187	0.332441	0.0270402	no	no	no	no
YJL042W::chr00_15	YJL042W	MHP1	0.205115	-0.0688495	0.332608	0.669083	no	no	no	no
YGR150C::chr7_5	YGR150C	CCM1	0.203928	-0.0781674	0.333591	0.673765	no	no	no	no
YJL161W::chr00_14	YJL161W	FMP33	0.2016	0.297187	0.335522	0.471573	no	yes	no	yes
YMR155W::chr13_4	YMR155W	YMR155W	0.201399	-0.352485	0.335689	0.797173	no	no	no	no
YDR512C::chr4_8	YDR512C	EMI1	0.200994	-0.188204	0.336026	0.726831	no	no	no	no
YML047C::chr00_11	YML047C	PRM6	0.200775	-0.240445	0.336208	0.750435	no	no	no	no
YDR466W::chr4_8	YDR466W	PKH3	0.200533	0.377465	0.336409	0.427446	no	no	no	no
YDR110W::chr4_4	YDR110W	FOB1	0.200302	0.0834833	0.336601	0.589275	no	no	no	no
YHR179W::chr8_3	YHR179W	OYE2	0.200076	0.577839	0.336789	0.322274	no	yes	no	yes
YDR371W::chr4_7	YDR371W	CTS2	0.198969	0.0988767	0.33771	0.580935	no	no	no	no
YDL094C::chr4_1	YDL094C	YDL094C	0.19885	0.245121	0.337809	0.500416	no	no	no	no
YDR504C::chr4_8	YDR504C	SPG3	0.198429	-0.977116	0.338159	0.955401	no	no	no	no
YER178W::chr00_5	YER178W	PDA1	0.198311	-1.89702	0.338258	0.99855	no	no	no	no
YPR149W::chr16_5	YPR149W	NCE102	0.198247	0.013759	0.338312	0.626493	no	no	no	no
YBR250W::chr2_4	YBR250W	SPO23	0.198194	0.0045383	0.338356	0.631336	no	no	no	no
YLR297W::chr12_4	YLR297W	YLR297W	0.197801	0.859564	0.338683	0.196864	no	no	no	no
YPL194W::chr00_18	YPL194W	DDC1	0.197641	0.640557	0.338817	0.29167	no	no	no	no
YLR063W::chr12_2	YLR063W	YLR063W	0.197619	-0.0243033	0.338835	0.646347	no	no	no	no
YBL031W::chr2_1	YBL031W	SHE1	0.197141	0.184551	0.339233	0.533957	no	no	no	no
YBL027W::chr2_1	YBL027W	RPL19B	0.196661	-0.495719	0.339634	0.848641	yes	no	yes	no
YDR445C::chr00_14	YDR445C	YDR445C	0.196228	-0.367711	0.339995	0.803094	no	no	no	no
YGL049C::chr7_1	YGL049C	TIF4632	0.195699	-0.627446	0.340436	0.887567	no	no	no	no
YLR364W::chr12_5	YLR364W	GRX8	0.195525	0.425413	0.340582	0.401481	no	yes	no	yes
YIL047C::chr9_1	YIL047C	SYG1	0.19537	0.0632126	0.340712	0.600194	no	no	no	no
YNL097C::chr00_16b	YNL097C	PHO23	0.195061	-1.33031	0.340969	0.985756	no	no	no	no
YNL057W::chr14_3	YNL057W	YNL057W	0.194398	0.910216	0.341524	0.177933	no	no	no	no
YOL128C::chr00_6	YOL128C	YGK3	0.194283	0.471142	0.34162	0.377114	no	no	no	no
YER114C::chr00_5	YER114C	BOI2	0.193949	0.335749	0.3419	0.450299	no	no	no	no
YPR008W::chr00_15	YPR008W	HAA1	0.193793	-2.32093	0.34203	0.99982	no	no	no	no
YML017W::chr13_2	YML017W	PSP2	0.192422	-0.184075	0.343177	0.724919	no	no	no	no
YIL136W::chr9_2	YIL136W	OM45	0.192379	0.0193121	0.343214	0.623566	no	no	no	no
YLR099C::chr12_2	YLR099C	ICT1	0.19234	0.960421	0.343246	0.160345	no	no	no	no
YBR217W::chr2_4	YBR217W	ATG12	0.19215	-0.355253	0.343405	0.798257	no	no	no	no
YPR009W::chr16_4	YPR009W	SUT2	0.192088	0.278548	0.343457	0.48189	no	no	no	no
YPL244C::chr16_1	YPL244C	HUT1	0.191824	0.291545	0.343678	0.474695	no	no	no	no
YLR122C::chr12_2	YLR122C	YLR122C	0.1918	0.699317	0.343699	0.26429	no	no	no	no
YIR004W::chr9_2	YIR004W	DJP1	0.191694	-0.550372	0.343787	0.865762	yes	no	yes	no
YNL338W::chr14_1	YNL338W	YNL338W	0.191053	0.342079	0.344325	0.446819	no	no	no	no
YOL081W::chr15_5	YOL081W	IRA2	0.190955	-0.971394	0.344407	0.954648	no	no	no	no
YOR226C::chr15_3	YOR226C	ISU2	0.190893	1.39475	0.344459	0.0551723	no	no	no	no
YKR014C::chr11_3	YKR014C	YPT52	0.19063	0.592986	0.344679	0.314761	no	yes	no	yes
YKL220C::chr00_14	YKL220C	FRE2	0.190603	0.628869	0.344702	0.29727	no	no	no	no
YDL174C::chr4_2	YDL174C	DLD1	0.190382	1.35211	0.344888	0.0620989	no	no	no	no
YML060W::chr13_1b	YML060W	OGG1	0.190236	0.883751	0.345011	0.187677	no	no	no	no
YOR175C::chr15_2	YOR175C	ALE1	0.189504	0.517439	0.345625	0.352935	no	no	no	no
YPR145W::chr16_5	YPR145W	ASN1	0.188231	0.688255	0.346695	0.269343	no	no	no	no
YDR112W::chr4_4	YDR112W	IRC2	0.187935	0.0653116	0.346944	0.599067	no	no	no	no
YDR484W::chr4_8	YDR484W	VPS52	0.187542	-0.581958	0.347274	0.875026	no	no	no	no
YGL004C::chr7_1	YGL004C	RPN14	0.187426	0.476514	0.347372	0.374282	no	no	no	no
YGR269W::chr00_3	YGR269W	YGR269W	0.186589	0.481811	0.348076	0.371496	no	no	no	no
YMR148W::chr13_4	YMR148W	OSW5	0.186166	-0.116074	0.348433	0.692523	no	no	no	no
YDL026W::chr4_1	YDL026W	YDL026W	0.185511	0.242013	0.348985	0.50214	no	no	no	no
YGL117W::chr7_2	YGL117W	YGL117W	0.185442	-1.19015	0.349043	0.977017	no	no	no	no
YHR091C::chr8_2	YHR091C	MSR1	0.184716	-0.854278	0.349655	0.936859	no	no	no	no
YDR507C::chr4_8	YDR507C	GIN4	0.18416	-0.640286	0.350124	0.890939	no	no	no	no
YMR023C::chr13_2	YMR023C	MSS1	0.183859	-0.601904	0.350378	0.88064	no	no	no	no
YBR047W::chr2_2	YBR047W	FMP23	0.183602	1.09172	0.350595	0.119894	no	no	no	no
YER184C::chr00_5	YER184C	YER184C	0.18332	0.109495	0.350833	0.575161	no	no	no	no
YER087W::chr5_3	YER087W	AIM10	0.183004	-0.0575739	0.3511	0.663383	no	no	no	no
YLR017W::chr12_1	YLR017W	MEU1	0.182985	-0.162971	0.351116	0.715046	no	no	no	no
YIL054W::chr9_1	YIL054W	YIL054W	0.182938	0.137899	0.351155	0.55964	no	no	no	no
YGR226C::chr00_2	YGR226C	YGR226C	0.182279	0.0996831	0.351712	0.580497	no	no	no	no
YER150W::chr00_5	YER150W	SPI1	0.181967	0.945628	0.351977	0.165405	no	no	no	no
YKL208W::chr11_3	YKL208W	CBT1	0.18171	-1.89426	0.352194	0.998531	yes	no	yes	no
YPR146C::chr16_5	YPR146C	YPR146C	0.181701	1.18966	0.352201	0.0948235	no	no	no	no
YDR057W::chr4_4	YDR057W	YOS9	0.18144	0.165469	0.352422	0.544485	no	no	no	no
YJL124C::chr10_2	YJL124C	LSM1	0.179718	0.378135	0.353879	0.42708	no	no	no	no
YDR518W::chr4_8	YDR518W	EUG1	0.179279	-1.48479	0.354252	0.991918	no	no	no	no
YDR142C::chr4_4	YDR142C	PEX7	0.179233	-0.105345	0.35429	0.687262	no	no	no	no
YLR416C::chr12_5	YLR416C	YLR416C	0.178923	0.117172	0.354553	0.570976	no	no	no	no
YOR179C::chr15_2	YOR179C	SYC1	0.178871	0.588036	0.354598	0.317208	no	no	no	no
YKL202W::chr00_14	YKL202W	YKL202W	0.177907	0.259823	0.355415	0.492266	no	no	no	no
YDL214C::chr4_3	YDL214C	PRR2	0.177745	-0.186557	0.355553	0.726069	no	no	no	no
YNR070W::chr00_6	YNR070W	PDR18	0.176955	0.116921	0.356223	0.571113	no	no	no	no
YDR490C::chr4_8	YDR490C	PKH1	0.176633	-0.582835	0.356497	0.875277	no	no	no	no
YAL045C::chr1_1	YAL045C	YAL045C	0.176554	0.892587	0.356563	0.184388	no	no	no	no
YNR012W::chr14_4	YNR012W	URK1	0.175462	2.69106	0.357492	0.00033917	no	yes	no	yes
YBL075C::chr2_1	YBL075C	SSA3	0.175023	-0.821621	0.357865	0.931035	no	no	no	no
YJL036W::chr10_2	YJL036W	SNX4	0.174991	-0.293588	0.357892	0.773286	no	no	no	no
YGL118C::chr7_2	YGL118C	YGL118C	0.17482	1.31037	0.358037	0.0695186	no	no	no	no
YLR214W::chr12_3	YLR214W	FRE1	0.174446	0.708753	0.358356	0.260019	no	yes	no	yes
YFL052W::chr6_1	YFL052W	YFL052W	0.174387	-0.324803	0.358406	0.786139	no	no	no	no
YGR102C::chr7_4	YGR102C	GTF1	0.173804	-0.670431	0.358902	0.898567	no	no	no	no
YBR186W::chr2_4	YBR186W	PCH2	0.173223	0.933626	0.359397	0.169586	no	yes	no	yes
YPL014W::chr16_3	YPL014W	YPL014W	0.173094	0.642413	0.359507	0.290785	no	no	no	no
YIL073C::chr9_1	YIL073C	SPO22	0.172288	-0.690465	0.360194	0.903417	no	no	no	no
YGL232W::chr7_3	YGL232W	TAN1	0.172082	0.315843	0.360369	0.461267	no	no	no	no
YIL086C::chr9_1	YIL086C	YIL086C	0.171764	0.381568	0.36064	0.42521	no	no	no	no
YML117W-A::chr00_9	YML116W-A	YML116W-A	0.17152	-0.161599	0.360848	0.714399	no	no	no	no
YDR207C::chr4_5	YDR207C	UME6	0.171086	2.08191	0.361219	0.00536112	no	yes	no	yes
YLR271W::chr12_4	YLR271W	YLR271W	0.170687	-0.163194	0.36156	0.715152	no	no	no	no
YGL087C::chr7_1	YGL087C	MMS2	0.170683	-0.232284	0.361563	0.74682	no	no	no	no
YOL017W::chr15_5	YOL017W	ESC8	0.170418	0.839405	0.361789	0.204725	no	no	no	no
YHR135C::chr8_2	YHR135C	YCK1	0.170304	2.28939	0.361886	0.00225582	no	no	no	no
YGR276C::chr00_17a	YGR276C	RNH70	0.169611	0.451616	0.362478	0.387465	no	no	no	no
YNL307C::chr14_1	YNL307C	MCK1	0.169525	3.47633	0.362551	3.56917e-06	no	yes	no	yes
YGR061C::chr7_4	YGR061C	ADE6	0.16951	-1.12982	0.362564	0.972053	no	no	no	no
YPL120W::chr16_2	YPL120W	VPS30	0.169161	2.80086	0.362862	0.000192042	no	no	no	yes
YPR166C::chr16_5	YPR166C	MRP2	0.16909	-0.766364	0.362923	0.92025	no	no	no	no
YPR199C::chr16_5	YPR199C	ARR1	0.168656	-0.249095	0.363294	0.754236	no	no	no	no
YOL083W::chr15_5	YOL083W	ATG34	0.168473	1.90812	0.36345	0.0104413	no	yes	no	yes
YDL222C::chr4_3	YDL222C	FMP45	0.168291	0.0343151	0.363606	0.615625	no	no	no	no
YER046W::chr00_10	YER046W	SPO73	0.167898	1.28718	0.363942	0.0739265	no	no	no	no
YFR056C::chr00_2	YFR056C	YFR056C	0.167774	-0.32934	0.364049	0.787971	no	no	no	no
YCR043C::chr00_1	YCR043C	YCR043C	0.167376	1.25421	0.364389	0.0805577	no	no	no	no
YAL030W::chr1_1	YAL030W	SNC1	0.167087	-0.0283808	0.364636	0.648451	no	no	no	no
YLR295C::chr12_4	YLR295C	ATP14	0.166603	-0.521882	0.36505	0.85701	yes	no	yes	no
YJL044C::chr10_2	YJL044C	GYP6	0.166601	1.07707	0.365052	0.124012	no	no	no	no
YNL237W::chr14_2	YNL237W	YTP1	0.16655	0.326513	0.365096	0.455384	no	no	no	no
YMR292W::chr13_5	YMR292W	GOT1	0.165638	0.043422	0.365877	0.610781	no	no	no	no
YLR025W::chr12_1	YLR025W	SNF7	0.165236	3.76834	0.366222	4.90675e-07	no	yes	no	yes
YBR235W::chr2_4	YBR235W	YBR235W	0.16467	0.505154	0.366707	0.359298	no	no	no	no
YER181C::chr00_5	YER181C	YER181C	0.164601	-0.559913	0.366766	0.868608	no	no	no	no
YMR194W::chr13_4	YMR194W	RPL36A	0.16458	1.41759	0.366784	0.0517206	no	no	no	no
YLR247C::chr12_4	YLR247C	IRC20	0.164337	-0.467009	0.366993	0.83909	no	no	no	no
YMR310C::chr13_5	YMR310C	YMR310C	0.164036	1.19906	0.367251	0.0926364	no	no	no	no
YNR044W::chr14_4	YNR044W	AGA1	0.163522	1.35295	0.367692	0.0619558	no	no	no	no
YPL025C::chr16_3	YPL025C	YPL025C	0.163291	0.27388	0.367891	0.484476	no	yes	no	yes
YLL041C::chr12_1	YLL041C	SDH2	0.163086	-0.150366	0.368066	0.70907	no	no	no	no
YJL084C::chr10_2	YJL084C	ALY2	0.162906	0.760168	0.368221	0.237384	no	no	no	no
YOR006C::chr15_1	YOR006C	TSR3	0.162616	-0.62791	0.36847	0.88769	no	no	no	no
YER170W::chr00_5	YER170W	ADK2	0.162614	-0.0104244	0.368472	0.63915	no	no	no	no
YPL065W::chr16_3	YPL065W	VPS28	0.162511	4.0946	0.36856	4.42799e-08	no	yes	no	yes
YLR406C::chr00_11	YLR406C	RPL31B	0.162231	0.277998	0.368801	0.482194	no	no	no	no
YHL012W::chr8_1	YHL012W	YHL012W	0.162231	0.55295	0.368801	0.334777	no	no	no	no
YKR090W::chr00_4	YKR090W	PXL1	0.161912	0.391203	0.369075	0.419969	no	no	no	no
YNL311C::chr14_1	YNL311C	SKP2	0.161447	-0.184847	0.369475	0.725277	no	no	no	no
YPL145C::chr16_2	YPL145C	KES1	0.16138	-0.425193	0.369532	0.82449	no	no	no	no
YNR002C::chr14_4	YNR002C	ATO2	0.160153	1.2059	0.370588	0.0910692	no	no	no	no
YDR034C::chr4_3	YDR034C	LYS14	0.157997	0.555896	0.372444	0.333287	no	yes	no	yes
YIL057C::chr9_1	YIL057C	RGI2	0.157997	0.0943257	0.372444	0.583405	no	no	no	no
YML019W::chr13_2	YML019W	OST6	0.157813	0.660183	0.372603	0.282379	no	no	no	no
YHL013C::chr8_1	YHL013C	OTU2	0.157054	0.587111	0.373258	0.317666	no	no	no	no
YDL010W::chr4_1	YDL010W	GRX6	0.156861	-0.192164	0.373424	0.728658	no	no	no	no
YMR012W::chr13_2	YMR012W	CLU1	0.15676	-0.0342148	0.373511	0.651454	no	no	no	no
YMR154C::chr00_10	YMR154C	RIM13	0.156475	2.02599	0.373757	0.00668197	no	yes	no	yes
YGL230C::chr7_3	YGL230C	YGL230C	0.15592	1.33526	0.374236	0.065017	no	no	no	no
YDL049C::chr4_1	YDL049C	KNH1	0.155285	-0.334024	0.374785	0.789852	no	no	no	no
YPR070W::chr16_4	YPR070W	MED1	0.155185	2.62461	0.374871	0.000473453	no	no	no	yes
YIL167W::chr9_2	YIL167W	SDL1	0.155008	0.178458	0.375023	0.537322	no	no	no	no
YGL162W::chr7_2	YGL162W	SUT1	0.154849	-0.0741371	0.375161	0.671743	no	no	no	no
YOR015W::chr15_1	YOR015W	YOR015W	0.153892	1.02195	0.375988	0.140395	no	no	no	no
YAL020C::chr1_1	YAL020C	ATS1	0.153441	0.397258	0.376378	0.416682	no	no	no	no
YGR295C::chr00_17b	YGR295C	COS6	0.153398	0.548282	0.376415	0.337143	no	no	no	no
YER182W::chr00_5	YER182W	FMP10	0.153173	0.607174	0.37661	0.307792	no	no	no	no
YPL067C::chr16_3	YPL067C	YPL067C	0.15307	0.921924	0.376699	0.173726	no	no	no	no
YCR026C::chr00_1	YCR026C	NPP1	0.152033	2.31405	0.377597	0.00202496	no	yes	no	yes
YKR041W::chr00_14	YKR041W	YKR041W	0.152003	0.792942	0.377622	0.223541	no	no	no	no
YMR201C::chr13_4	YMR201C	RAD14	0.151638	0.579587	0.377939	0.321403	no	no	no	no
YIL131C::chr9_2	YIL131C	FKH1	0.151092	1.37674	0.378411	0.0580198	no	no	no	no
YOR034C::chr15_1	YOR034C	AKR2	0.150902	-0.0248956	0.378576	0.646653	no	no	no	no
YOR014W::chr15_1	YOR014W	RTS1	0.149546	1.02859	0.379751	0.138345	no	yes	no	yes
YJR052W::chr00_13	YJR052W	RAD7	0.149411	0.566828	0.379868	0.327782	no	no	no	no
YOR379C::chr15_4	YOR379C	YOR379C	0.148888	-0.50956	0.380322	0.853109	no	no	no	no
YOR043W::chr15_1	YOR043W	WHI2	0.1483	1.97635	0.380832	0.0080878	no	no	no	no
YHR112C::chr8_2	YHR112C	YHR112C	0.14828	-0.0371159	0.380849	0.652944	no	no	no	no
YBR007C::chr2_2	YBR007C	DSF2	0.147949	0.28686	0.381137	0.477287	no	no	no	no
YDR195W::chr4_5	YDR195W	REF2	0.147754	3.6103	0.381306	1.4647e-06	no	yes	no	yes
YFR036W::chr00_2	YFR036W	CDC26	0.147639	-0.624928	0.381406	0.886897	no	no	no	no
YER083C::chr5_3	YER083C	GET2	0.147581	-0.618327	0.381456	0.885128	no	no	no	no
YCR017C::chr3_1	YCR017C	CWH43	0.147316	-1.14977	0.381686	0.973786	no	no	no	no
YGL042C::chr7_1	YGL042C	YGL042C	0.147113	-0.223692	0.381863	0.742985	no	no	no	no
YOL013C::chr15_5	YOL013C	HRD1	0.146796	0.145394	0.382138	0.555527	no	no	no	no
YHR039C::chr8_1	YHR039C	MSC7	0.146709	-0.074786	0.382214	0.672069	no	no	no	no
YOL109W::chr00_6	YOL109W	ZEO1	0.146634	0.0550345	0.382279	0.604578	no	no	no	no
YGR291C::chr00_17a	YGR291C	YGR291C	0.146518	-0.130192	0.382379	0.699386	no	no	no	no
YCR059C::chr00_1	YCR059C	YIH1	0.14647	0.00411669	0.382421	0.631557	no	no	no	no
YFL016C::chr00_17a	YFL016C	MDJ1	0.146211	-1.18582	0.382646	0.976687	yes	no	yes	no
YDR503C::chr4_8	YDR503C	LPP1	0.146084	0.190462	0.382757	0.530691	no	no	no	no
YIL008W::chr9_1	YIL008W	URM1	0.145888	0.947115	0.382927	0.164892	no	no	no	no
YGR187C::chr7_5	YGR187C	HGH1	0.145669	-0.568179	0.383118	0.871041	no	no	no	no
YIR013C::chr9_2	YIR013C	GAT4	0.145583	0.328878	0.383193	0.454081	no	no	no	no
YIL074C::chr9_1	YIL074C	SER33	0.14558	-0.300581	0.383195	0.776203	no	no	no	no
YLR093C::chr12_2	YLR093C	NYV1	0.145146	0.652282	0.383572	0.286103	no	no	no	no
YJR026W::chr00_13	YJR026W	YJR026W	0.144748	-0.0239619	0.383919	0.64617	no	no	no	no
YEL038W::chr5_2	YEL038W	UTR4	0.144495	0.00401669	0.384139	0.631609	no	no	no	no
YAL019W::chr1_1	YAL019W	FUN30	0.144484	0.72938	0.384149	0.250807	no	no	no	no
YCR077C::chr00_1	YCR077C	PAT1	0.144299	0.462996	0.38431	0.381422	no	yes	no	yes
YNL035C::chr14_4	YNL035C	YNL035C	0.143513	1.43175	0.384994	0.0496698	no	yes	no	yes
YLR337C::chr12_5	YLR337C	VRP1	0.143289	1.28104	0.385189	0.0751296	no	yes	no	yes
YDL065C::chr4_1	YDL065C	PEX19	0.142881	-1.02371	0.385544	0.961167	no	no	no	no
YNL273W::chr14_1	YNL273W	TOF1	0.142669	0.481686	0.385729	0.371561	no	no	no	no
YER097W::chr00_8	YER097W	YER097W	0.142545	0.0788899	0.385837	0.591755	no	no	no	no
YPR063C::chr16_4	YPR063C	YPR063C	0.141249	0.343252	0.386967	0.446174	no	no	no	no
YGR036C::chr7_4	YGR036C	CAX4	0.141068	-0.503876	0.387124	0.851285	yes	no	yes	no
YPL004C::chr00_17b	YPL004C	LSP1	0.141068	0.0414499	0.387124	0.611831	yes	no	yes	no
YPL253C::chr16_1	YPL253C	VIK1	0.141009	0.589735	0.387176	0.316367	no	no	no	no
YPR119W::chr16_5	YPR119W	CLB2	0.140841	0.205813	0.387322	0.522198	no	no	no	no
YOR037W::chr15_1	YOR037W	CYC2	0.140273	-0.0258834	0.387818	0.647163	no	no	no	no
YOR093C::chr15_1	YOR093C	YOR093C	0.140229	1.04245	0.387857	0.134137	no	yes	no	yes
YKR013W::chr11_3	YKR013W	PRY2	0.13994	0.478118	0.388109	0.373437	no	no	no	no
YOR351C::chr15_4	YOR351C	MEK1	0.13991	0.200278	0.388135	0.525262	no	no	no	no
YDL125C::chr4_2	YDL125C	HNT1	0.139658	-0.0932659	0.388355	0.681292	no	no	no	no
YCL026C::chr3_1	deleted	YCL026C	0.139595	-0.0597226	0.38841	0.664472	no	no	no	no
YIR021W::chr00_3	YIR021W	MRS1	0.13904	-1.17644	0.388894	0.97596	no	no	no	no
YDR171W::chr4_5	YDR171W	HSP42	0.138954	0.658403	0.38897	0.283216	no	no	no	no
YOL046C::chr15_5	YOL046C	YOL046C	0.138754	0.94149	0.389145	0.166839	no	no	no	no
YPL009C::chr16_3	YPL009C	TAE2	0.138732	0.386825	0.389164	0.422349	no	yes	no	yes
YPL125W::chr16_2	YPL125W	KAP120	0.138732	1.97179	0.389164	0.00822927	no	yes	no	yes
YIL148W::chr9_2	YIL148W	RPL40A	0.138264	2.307	0.389573	0.00208872	no	no	no	no
YPL241C::chr16_1	YPL241C	CIN2	0.137522	-0.392482	0.390221	0.812501	no	no	no	no
YLR188W::chr12_3	YLR188W	MDL1	0.137213	0.0760826	0.390491	0.59327	no	no	no	no
YJR058C::chr00_13	YJR058C	APS2	0.136966	0.0407244	0.390707	0.612218	no	no	no	no
YBR134W::chr2_3	YBR134W	YBR134W	0.135271	0.0786498	0.39219	0.591885	no	no	no	no
YJR104C::chr00_12	YJR104C	SOD1	0.135238	-0.170088	0.392219	0.718395	no	no	no	no
YOR246C::chr15_3	YOR246C	ENV9	0.135029	-1.43297	0.392402	0.99018	no	no	no	no
YPR013C::chr00_15	YPR013C	YPR013C	0.134998	0.498538	0.392429	0.362741	no	no	no	no
YER093C-A::chr00_8	YER093C-A	AIM11	0.134676	-0.206687	0.392711	0.735307	no	no	no	no
YGL126W::chr7_2	YGL126W	SCS3	0.134676	0.0960088	0.392711	0.582492	no	no	no	no
YOR185C::chr15_2	YOR185C	GSP2	0.13437	0.0486454	0.392979	0.607994	no	no	no	no
YPL236C::chr16_1	YPL236C	ENV7	0.134276	0.259713	0.393062	0.492327	no	yes	no	yes
YDR321W::chr4_6	YDR321W	ASP1	0.134249	-0.0758421	0.393085	0.672599	no	no	no	no
YHL007C::chr8_1	YHL007C	STE20	0.134082	0.558376	0.393231	0.332035	no	no	no	no
YDR291W::chr4_6	YDR291W	HRQ1	0.133839	0.426044	0.393444	0.401142	no	no	no	no
YNL268W::chr00_18	YNL268W	LYP1	0.133498	0.115404	0.393742	0.571941	no	no	no	no
YNL206C::chr14_2	YNL206C	RTT106	0.133256	1.41266	0.393955	0.0524502	no	yes	no	yes
YLR151C::chr12_3	YLR151C	PCD1	0.132385	0.120466	0.394718	0.569178	no	no	no	no
YPR130C::chr16_5	YPR130C	YPR130C	0.132335	0.891722	0.394762	0.184708	no	no	no	no
YCR060W::chr00_16a	YCR060W	TAH1	0.131727	-0.116794	0.395296	0.692874	no	no	no	no
YJL159W::chr10_1	YJL159W	HSP150	0.131011	-0.466771	0.395924	0.839009	yes	no	yes	no
YDR513W::chr4_8	YDR513W	GRX2	0.130356	-0.562006	0.396499	0.869227	no	no	no	no
YJL135W::chr10_1	YJL135W	YJL135W	0.129965	0.426084	0.396842	0.40112	no	no	no	no
YEL017W::chr5_2	YEL017W	GTT3	0.129779	0.285762	0.397006	0.477895	no	no	no	no
YOR105W::chr15_2	YOR105W	YOR105W	0.129428	-0.260683	0.397314	0.759279	no	no	no	no
YIL029C::chr9_1	YIL029C	YIL029C	0.129053	1.47696	0.397643	0.0435497	no	no	no	no
YHL028W::chr8_1	YHL028W	WSC4	0.129041	0.143547	0.397655	0.556541	no	no	no	no
YLR135W::chr12_3	YLR135W	SLX4	0.129	0.00341673	0.397691	0.631923	no	no	no	no
YDL044C::chr4_1	YDL044C	MTF2	0.127928	-1.43153	0.398632	0.990128	no	no	no	no
YHR137W::chr8_2	YHR137W	ARO9	0.127703	0.029227	0.398831	0.618324	no	no	no	no
YGL010W::chr7_1	YGL010W	YGL010W	0.127664	-0.240844	0.398864	0.750611	no	no	no	no
YLR042C::chr12_2	YLR042C	YLR042C	0.126853	0.496158	0.399578	0.363982	no	no	no	no
YKL138C::chr11_2	YKL138C	MRPL31	0.126706	-0.742795	0.399707	0.915279	no	no	no	no
YER037W::chr00_11	YER037W	PHM8	0.125575	-0.322882	0.400703	0.78536	no	no	no	no
YPL115C::chr16_2	YPL115C	BEM3	0.125256	0.124565	0.400983	0.566939	no	no	no	no
YDR203W::chr4_5	YDR203W	YDR203W	0.124694	-0.464955	0.401479	0.838392	no	no	no	no
YER030W::chr5_3	YER030W	CHZ1	0.124657	-0.89347	0.401511	0.943335	no	no	no	no
YEL047C::chr5_2	YEL047C	YEL047C	0.124112	-0.287756	0.401992	0.770838	no	no	no	no
YDR435C::chr4_7	YDR435C	PPM1	0.123991	1.49761	0.402098	0.0409642	no	yes	no	yes
YDL117W::chr4_2	YDL117W	CYK3	0.123905	1.35608	0.402174	0.0614263	no	yes	no	yes
YKL123W::chr11_2	YKL123W	YKL123W	0.123013	-0.708535	0.40296	0.907644	no	no	no	no
YGL002W::chr7_1	YGL002W	ERP6	0.122834	-0.0172151	0.403118	0.642677	no	no	no	no
YOR297C::chr15_4	YOR297C	TIM18	0.122681	-1.84439	0.403253	0.998163	no	no	no	no
YKL214C::chr11_3	YKL214C	YRA2	0.122669	-0.0383433	0.403264	0.653574	no	no	no	no
YDR251W::chr4_6	YDR251W	PAM1	0.122274	0.378243	0.403612	0.427021	no	no	no	no
YDR067C::chr4_4	YDR067C	OCA6	0.121899	2.46651	0.403943	0.00101391	no	no	no	no
YFR015C::chr6_1	YFR015C	GSY1	0.12184	-0.132622	0.403995	0.70056	no	no	no	no
YBR065C::chr2_2	YBR065C	ECM2	0.121307	0.200025	0.404465	0.525402	no	no	no	no
YDL074C::chr4_1	YDL074C	BRE1	0.121287	-0.821842	0.404483	0.931076	no	no	no	no
YAL008W::chr1_1	YAL008W	FUN14	0.121101	0.559293	0.404648	0.331572	no	no	no	no
YDR428C::chr4_7	YDR428C	BNA7	0.120906	0.211458	0.404819	0.519073	no	yes	no	yes
YGL194C::chr7_3	YGL194C	HOS2	0.120825	0.0205789	0.404891	0.622898	no	no	no	no
YEL062W::chr5_2	YEL062W	NPR2	0.120633	0.614827	0.40506	0.304062	no	no	no	no
YKR011C::chr11_3	YKR011C	YKR011C	0.120616	0.0991987	0.405076	0.58076	no	no	no	no
YCL035C::chr00_11	YCL035C	GRX1	0.120385	-0.0735128	0.405279	0.67143	no	no	no	no
YLR391W::chr12_5	YLR390W-A	CCW14	0.120029	-0.487389	0.405594	0.84591	no	no	no	no
YER185W::chr00_5	YER185W	PUG1	0.120019	-0.174116	0.405602	0.720281	no	no	no	no
YPL104W::chr16_2	YPL104W	MSD1	0.119872	-2.29936	0.405733	0.999798	no	no	no	no
YJR083C::chr10_4	YJR083C	ACF4	0.119633	-1.43118	0.405943	0.990115	no	no	no	no
YLR346C::chr00_11	YLR346C	YLR346C	0.119476	0.396062	0.406083	0.417331	no	no	no	no
YIL161W::chr9_2	YIL161W	YIL161W	0.118682	0.552805	0.406784	0.33485	no	no	no	no
YPR087W::chr16_4	YPR087W	VPS69	0.118638	2.85745	0.406823	0.000142023	no	no	no	yes
YML109W::chr00_9	YML109W	ZDS2	0.118506	-0.328879	0.406939	0.787785	no	no	no	no
YGL072C::chr7_1	YGL072C	YGL072C	0.117852	1.46439	0.407518	0.0451866	no	no	no	no
YCL063W::chr3_1	YCL063W	VAC17	0.11785	0.312296	0.40752	0.463225	no	no	no	no
YIL099W::chr9_2	YIL099W	SGA1	0.117842	0.846461	0.407526	0.201953	no	no	no	no
YNL183C::chr14_2	YNL183C	NPR1	0.117247	2.30296	0.408053	0.00212606	no	yes	no	yes
YBR105C::chr2_3	YBR105C	VID24	0.11668	-0.558403	0.408554	0.868161	no	no	no	no
YLR027C::chr12_1	YLR027C	AAT2	0.116163	1.02334	0.409012	0.139965	no	yes	no	yes
YPL182C::chr16_2	YPL182C	YPL182C	0.116065	-0.891818	0.409099	0.943073	no	no	no	no
YPR051W::chr16_4	YPR051W	MAK3	0.115633	-0.318129	0.409481	0.783427	no	no	no	no
YBR054W::chr2_2	YBR054W	YRO2	0.114917	0.420222	0.410115	0.404273	no	no	no	no
YEL037C::chr5_2	YEL037C	RAD23	0.114674	0.911738	0.41033	0.177383	no	no	no	no
YJL047C::chr10_2	YJL047C	RTT101	0.114511	-0.720956	0.410475	0.910469	no	no	no	no
YJR099W::chr00_12	YJR099W	YUH1	0.114496	-0.258996	0.410488	0.758548	no	no	no	no
YHR152W::chr8_3	YHR152W	SPO12	0.11412	-0.240059	0.410821	0.750264	no	no	no	no
YJL141C::chr00_14	YJL141C	YAK1	0.114071	1.30329	0.410865	0.0708426	no	no	no	no
YMR311C::chr00_8	YMR311C	GLC8	0.113894	-1.84924	0.411021	0.998203	no	no	no	no
YDR326C::chr00_17a	YDR326C	YSP2	0.113412	0.0487684	0.411449	0.607929	no	no	no	no
YOR068C::chr15_1	YOR068C	VAM10	0.113166	-0.655446	0.411666	0.894825	no	no	no	no
YIR039C::chr00_3	YIR039C	YPS6	0.113102	-0.213787	0.411723	0.738527	no	no	no	no
YGL066W::chr7_1	YGL066W	SGF73	0.113079	-1.44243	0.411743	0.99052	no	no	no	no
YER154W::chr00_5	YER154W	OXA1	0.11302	-1.00605	0.411796	0.959058	no	no	no	no
YCR091W::chr00_2	YCR091W	KIN82	0.112695	0.0371594	0.412084	0.614114	no	no	no	no
YGL257C::chr7_3	YGL257C	MNT2	0.112688	-0.64045	0.412091	0.890981	no	no	no	no
YOR124C::chr15_2	YOR124C	UBP2	0.112316	1.30683	0.41242	0.0701782	no	no	no	no
YEL053C::chr5_2	YEL053C	MAK10	0.112133	-0.963801	0.412582	0.953632	no	no	no	no
YFR012W::chr6_1	YFR012W	DCV1	0.111554	-0.211376	0.413096	0.737436	no	no	no	no
YCR087W::chr00_1	YCR087W	YCR087W	0.111309	1.51163	0.413313	0.0392815	no	yes	no	yes
YNL194C::chr14_2	YNL194C	YNL194C	0.110964	-0.407457	0.413619	0.818051	no	no	no	no
YPL098C::chr16_2	YPL098C	MGR2	0.110494	-1.11696	0.414037	0.970887	no	no	no	no
YIL145C::chr9_2	YIL145C	PAN6	0.11034	-0.169711	0.414173	0.718218	no	no	no	no
YNL095C::chr00_16b	YNL095C	YNL095C	0.109599	1.11133	0.414831	0.114532	no	no	no	no
YMR173W::chr00_11	YMR173W	DDR48	0.109252	1.03435	0.41514	0.136586	no	no	no	no
YNL257C::chr14_1	YNL257C	SIP3	0.109202	-0.975499	0.415184	0.955189	no	no	no	no
YGR125W::chr7_5	YGR125W	YGR125W	0.108156	0.444117	0.416113	0.391462	no	no	no	no
YNL092W::chr14_3	YNL092W	YNL092W	0.10774	1.36934	0.416483	0.0592227	no	yes	no	yes
YBR034C::chr2_2	YBR034C	HMT1	0.106675	0.756706	0.41743	0.238874	no	no	no	no
YMR145C::chr13_4	YMR145C	NDE1	0.105679	-0.11142	0.418315	0.690245	no	no	no	no
YGR281W::chr00_3	YGR281W	YOR1	0.105035	0.250281	0.418889	0.497555	no	no	no	no
YGR007W::chr7_3	YGR007W	ECT1	0.105031	1.32125	0.418892	0.0675222	no	no	no	no
YBR273C::chr00_1	YBR273C	UBX7	0.104542	-0.202309	0.419327	0.733311	yes	no	yes	no
YJR087W::chr00_12	YJR087W	YJR087W	0.104538	0.23956	0.41933	0.503499	no	no	no	no
YLR164W::chr12_3	YLR164W	SHH4	0.104189	0.79642	0.419642	0.222099	no	yes	no	yes
YKL026C::chr11_1	YKL026C	GPX1	0.103566	1.0433	0.420197	0.133883	no	no	no	no
YOR199W::chr15_3	YOR199W	YOR199W	0.103498	-2.18543	0.420257	0.999636	no	no	no	no
YDL183C::chr4_2	YDL183C	YDL183C	0.103369	0.522626	0.420372	0.35026	no	no	no	no
YDL197C::chr4_3	YDL197C	ASF2	0.10287	0.59504	0.420816	0.313748	no	no	no	no
YHR130C::chr8_2	YHR130C	YHR130C	0.102228	-0.667421	0.421388	0.897823	no	no	no	no
YJL179W::chr10_1	YJL179W	PFD1	0.101849	2.46403	0.421726	0.00102575	no	yes	no	yes
YDR128W::chr4_4	YDR128W	MTC5	0.101607	0.064936	0.421942	0.599269	no	no	no	no
YJL053W::chr10_2	YJL053W	PEP8	0.100987	-0.32107	0.422495	0.784624	no	no	no	no
YPL176C::chr16_2	YPL176C	TRE1	0.100808	-0.225665	0.422654	0.743868	no	no	no	no
YIR037W::chr00_3	YIR037W	HYR1	0.100557	0.349153	0.422878	0.442934	no	no	no	no
YLR092W::chr12_2	YLR092W	SUL2	0.100359	0.72915	0.423054	0.250908	no	no	no	no
YER123W::chr00_5	YER123W	YCK3	0.100166	0.770617	0.423227	0.23292	no	no	no	no
YDL046W::chr4_1	YDL046W	NPC2	0.0999407	0.0193101	0.423427	0.623568	no	no	no	no
YOR011W::chr15_1	YOR011W	AUS1	0.099587	0.356922	0.423743	0.438674	no	no	no	no
YOR107W::chr15_2	YOR107W	RGS2	0.0989833	-0.581088	0.424282	0.874777	no	no	no	no
YPR158W::chr16_5	YPR158W	CUR1	0.0981385	-0.280185	0.425036	0.767637	no	no	no	no
YHR114W::chr8_2	YHR114W	BZZ1	0.0975822	-0.410708	0.425532	0.819242	no	no	no	no
YKL113C::chr11_2	YKL113C	RAD27	0.097214	0.624368	0.425861	0.299439	no	no	no	no
YGL078C::chr7_1	YGL078C	DBP3	0.097153	2.75039	0.425916	0.000250107	no	no	no	yes
YFR049W::chr00_2	YFR049W	YMR31	0.0970824	-0.0490201	0.425979	0.659033	no	no	no	no
YJL049W::chr10_2	YJL049W	YJL049W	0.0966124	0.0765597	0.426399	0.593013	no	no	no	no
YKR017C::chr11_3	YKR017C	YKR017C	0.0962118	0.918676	0.426756	0.174887	no	yes	no	yes
YMR186W::chr13_4	YMR186W	HSC82	0.0960835	-0.605366	0.426871	0.881597	no	no	no	no
YDL112W::chr4_2	YDL112W	TRM3	0.0959146	0.0758465	0.427022	0.593397	no	no	no	no
YER062C::chr5_3	YER062C	HOR2	0.0956777	0.0578696	0.427234	0.60306	no	no	no	no
YLR423C::chr00_4	YLR423C	ATG17	0.0952534	3.69083	0.427613	8.43879e-07	no	yes	no	yes
YKR033C::chr11_3	YKR033C	YKR033C	0.0949271	-0.155405	0.427904	0.711467	no	no	no	no
YDL035C::chr4_1	YDL035C	GPR1	0.0947619	1.36175	0.428052	0.060476	no	no	no	no
YGR207C::chr7_5	YGR207C	CIR1	0.0944633	-0.336023	0.428319	0.790653	no	no	no	no
YBR174C::chr2_4	YBR174C	YBR174C	0.0944129	-0.199677	0.428364	0.732108	no	no	no	no
YML087C::chr13_1b	YML087C	AIM33	0.0940798	0.494321	0.428662	0.364942	no	no	no	no
YML048W::chr13_1b	YML048W	GSF2	0.0937788	-1.52738	0.428931	0.993137	no	no	no	no
YGL262W::chr7_3	YGL262W	YGL262W	0.0933312	0.900528	0.429332	0.181462	no	yes	no	yes
YDR186C::chr4_5	YDR186C	YDR186C	0.0932983	-0.184519	0.429361	0.725125	no	no	no	no
YNL228W::chr14_2	YNL228W	YNL228W	0.0929096	1.7583	0.429709	0.0177814	no	yes	no	yes
YJR031C::chr00_13	YJR031C	GEA1	0.0925679	0.0593767	0.430014	0.602252	no	no	no	no
YBL011W::chr2_1	YBL011W	SCT1	0.0920622	0.403709	0.430467	0.413187	no	no	no	no
YER016W::chr5_3	YER016W	BIM1	0.0919869	0.667258	0.430534	0.279066	no	no	no	no
YJL185C::chr10_1	YJL185C	YJL185C	0.0918048	-0.225937	0.430697	0.74399	no	no	no	no
YDR443C::chr4_8	YDR443C	SSN2	0.0917239	2.261	0.43077	0.00255102	no	no	no	no
YCL050C::chr3_1	YCL050C	APA1	0.0910956	0.0202866	0.431332	0.623052	no	no	no	no
YEL009C::chr5_2	YEL009C	GCN4	0.0909527	-1.92257	0.43146	0.998709	no	no	no	no
YIL013C::chr9_1	YIL013C	PDR11	0.0908921	0.0391523	0.431514	0.613054	no	no	no	no
YGL053W::chr7_1	YGL053W	PRM8	0.0908737	0.176898	0.431531	0.538183	no	no	no	no
YOR385W::chr15_5	YOR385W	YOR385W	0.090417	1.09665	0.43194	0.118529	no	no	no	no
YMR172C-A::chr13_4	YMR172C-A	YMR172C-A	0.0901886	2.36848	0.432144	0.00158947	no	no	no	no
YEL071W::chr5_2	YEL071W	DLD3	0.0901611	-0.544987	0.432169	0.864136	no	no	no	no
YDR148C::chr4_5	YDR148C	KGD2	0.0898751	0.96307	0.432425	0.159449	no	yes	no	yes
YDL019C::chr4_1	YDL019C	OSH2	0.0894949	0.013677	0.432766	0.626536	no	no	no	no
YDR430C::chr4_7	YDR430C	CYM1	0.0891923	0.563546	0.433037	0.32943	no	no	no	no
YOR349W::chr15_4	YOR349W	CIN1	0.0880243	0.377165	0.434084	0.427609	no	no	no	no
YCL037C::chr3_1	YCL037C	SRO9	0.0877533	0.0765211	0.434327	0.593033	no	no	no	no
YOR304C-A::chr15_4	YOR304C-A	YOR304C-A	0.0869105	1.24483	0.435082	0.0825235	no	no	no	no
YKL217W::chr11_3	YKL217W	JEN1	0.0869047	-0.858061	0.435087	0.937508	no	no	no	no
YOR177C::chr15_2	YOR177C	MPC54	0.0866833	0.55054	0.435286	0.335998	no	no	no	no
YGR028W::chr00_14	YGR028W	MSP1	0.086586	-0.219202	0.435373	0.740969	no	no	no	no
YML011C::chr13_2	YML011C	RAD33	0.0859402	0.612065	0.435952	0.305406	no	no	no	no
YDR152W::chr4_5	YDR152W	GIR2	0.0857605	0.094942	0.436114	0.58307	no	no	no	no
YKL096W-A::chr00_14	YKL096W-A	CWP2	0.0857513	-0.598128	0.436122	0.879591	no	no	no	no
YBR208C::chr2_4	YBR208C	DUR1,2	0.0857458	-0.491689	0.436127	0.847324	no	no	no	no
YPL137C::chr00_17b	YPL137C	GIP3	0.0854198	-2.259	0.436419	0.99975	no	no	no	no
YMR182C::chr13_4	YMR182C	RGM1	0.0846962	0.151216	0.437069	0.552329	no	no	no	no
YML071C::chr00_9	YML071C	COG8	0.0841582	-0.763448	0.437551	0.919647	no	no	no	no
YER118C::chr00_5	YER118C	SHO1	0.0840858	-0.259641	0.437617	0.758828	no	no	no	no
YBR162W-A::chr2_3	YBR162W-A	YSY6	0.0840704	0.0785557	0.43763	0.591936	no	no	no	no
YJL152W::chr10_1	YJL152W	YJL152W	0.0837448	0.502995	0.437923	0.36042	no	no	no	no
YML117W::chr00_9	YML117W	NAB6	0.0835235	-1.19986	0.438121	0.977742	no	no	no	no
YFL031W::chr6_1	YFL031W	HAC1	0.0835215	-0.289939	0.438123	0.771756	no	no	no	no
YBR285W::chr00_1	YBR285W	YBR285W	0.0833907	0.106039	0.438241	0.577042	no	no	no	no
YLR366W::chr12_5	YLR366W	YLR366W	0.0827594	0.433868	0.438807	0.396943	no	no	no	no
YIL006W::chr9_1	YIL006W	YIA6	0.0819027	-0.197786	0.439577	0.731242	no	no	no	no
YNR027W::chr14_4	YNR027W	BUD17	0.081468	0.578701	0.439967	0.321844	no	no	no	no
YPL136W::chr16_2	YPL136W	YPL136W	0.0811049	-2.84279	0.440294	0.999991	no	no	no	no
YGR149W::chr7_5	YGR149W	YGR149W	0.0811049	-0.460738	0.440294	0.836952	no	no	no	no
YCL049C::chr3_1	YCL049C	YCL049C	0.0811049	0.0269118	0.440294	0.61955	no	no	no	no
YGL170C::chr7_2	YGL170C	SPO74	0.0811049	0.441175	0.440294	0.393034	no	no	no	no
YNL269W::chr14_1	YNL269W	BSC4	0.0811049	-0.491453	0.440294	0.847246	no	no	no	no
YPL162C::chr16_2	YPL162C	YPL162C	0.0811049	-0.690315	0.440294	0.903382	no	no	no	no
YJR054W::chr00_13	YJR054W	YJR054W	0.0811049	0.698286	0.440294	0.264759	no	yes	no	yes
YDL149W::chr4_2	YDL149W	ATG9	0.0800637	-0.599036	0.44123	0.879844	no	no	no	no
YKR098C::chr00_4	YKR098C	UBP11	0.0800179	1.04547	0.441271	0.133233	no	no	no	no
YBR239C::chr2_4	YBR239C	ERT1	0.0794683	-0.146955	0.441765	0.707443	no	no	no	no
YMR300C::chr13_5	YMR300C	ADE4	0.0791421	-1.99947	0.442058	0.999097	no	no	no	no
YJR037W::chr00_13	YJR037W	YJR037W	0.0791309	0.108134	0.442068	0.575902	no	no	no	no
YDL106C::chr4_2	YDL106C	PHO2	0.0788595	1.24447	0.442312	0.0825986	no	no	no	no
YIL111W::chr9_2	YIL111W	COX5B	0.0784183	0.327791	0.442709	0.45468	no	no	no	no
YJR066W::chr00_13	YJR066W	TOR1	0.0779959	0.0456844	0.443089	0.609575	no	no	no	no
YNR005C::chr14_4	YNR005C	YNR005C	0.0779096	0.828769	0.443167	0.208947	no	yes	no	yes
YER131W::chr00_5	YER131W	RPS26B	0.0770808	0.133608	0.443912	0.561991	no	no	no	no
YER074W::chr5_3	YER074W	RPS24A	0.0765533	2.96316	0.444387	7.95729e-05	no	no	no	yes
YGL104C::chr7_2	YGL104C	VPS73	0.0763226	0.110029	0.444595	0.57487	no	no	no	no
YBR139W::chr2_3	YBR139W	YBR139W	0.0760089	0.675371	0.444877	0.275289	no	no	no	no
YKL065C::chr11_1	YKL065C	YET1	0.0758935	-0.304959	0.444981	0.778018	no	no	no	no
YMR074C::chr00_15	YMR074C	YMR074C	0.0758009	-0.807025	0.445064	0.928302	no	no	no	no
YPL097W::chr16_2	YPL097W	MSY1	0.0755561	-0.987332	0.445285	0.956721	no	no	no	no
YDR083W::chr4_4	YDR083W	RRP8	0.0750748	2.91114	0.445718	0.000106092	no	yes	no	yes
YBR248C::chr2_4	YBR248C	HIS7	0.0749396	0.0548485	0.44584	0.604678	no	no	no	no
YPR195C::chr16_5	YPR195C	YPR195C	0.0745097	1.5856	0.446227	0.0313098	no	no	no	no
YBR036C::chr2_2	YBR036C	CSG2	0.0744309	-0.804876	0.446298	0.927893	no	no	no	no
YLR395C::chr12_5	YLR395C	COX8	0.0743999	-0.0116185	0.446326	0.639771	no	no	no	no
YNR032W::chr14_4	YNR032W	PPG1	0.0738842	-0.748027	0.44679	0.916402	no	no	no	no
YJL196C::chr00_14	YJL196C	ELO1	0.0736725	-0.11448	0.446981	0.691743	no	no	no	no
YCL076W::chr00_12	YCL076W	YCL076W	0.0735312	1.00258	0.447108	0.146485	no	no	no	no
YOR112W::chr15_2	YOR112W	CEX1	0.0735133	0.213075	0.447124	0.518177	no	no	no	no
YER188W::chr00_2	YER188W	YER188W	0.0730953	0.20966	0.447501	0.520069	no	no	no	no
YOL001W::chr15_5	YOL001W	PHO80	0.0727877	1.57054	0.447778	0.0328139	no	yes	no	yes
YCR020C-A::chr3_1	YCR020C-A	MAK31	0.0725767	-1.24846	0.447968	0.981087	no	no	no	no
YLR139C::chr12_3	YLR139C	SLS1	0.0725259	-1.60762	0.448014	0.995001	no	no	no	no
YMR247C::chr13_5	YMR247C	RKR1	0.0721718	0.927665	0.448333	0.171687	no	yes	no	yes
YGR229C::chr00_2	YGR229C	SMI1	0.0719899	-2.17	0.448497	0.999607	no	no	no	no
YIL066C::chr9_1	YIL066C	RNR3	0.0718695	-0.502289	0.448605	0.850773	no	no	no	no
YIL093C::chr9_1	YIL093C	RSM25	0.0718196	-1.46001	0.44865	0.991124	no	no	no	no
YIL089W::chr9_1	YIL089W	YIL089W	0.0717446	0.323578	0.448718	0.457001	no	no	no	no
YGR101W::chr7_4	YGR101W	PCP1	0.0715247	-0.884554	0.448916	0.94191	no	no	no	no
YHR076W::chr8_2	YHR076W	PTC7	0.0713734	-0.364569	0.449052	0.801881	no	no	no	no
YDR483W::chr4_8	YDR483W	KRE2	0.0712588	-0.111734	0.449156	0.690399	no	no	no	no
YBR141C::chr2_3	YBR141C	YBR141C	0.0712571	0.733439	0.449157	0.249014	no	no	no	no
YBR075W::chr00_18	YBR074W	YBR074W	0.0710071	-0.409395	0.449382	0.818761	no	no	no	no
YLR052W::chr00_8	YLR052W	IES3	0.0705001	0.65573	0.44984	0.284475	no	no	no	no
YEL060C::chr5_2	YEL060C	PRB1	0.0704695	0.0704695	0.449867	0.596294	yes	yes	yes	yes
YNL297C::chr14_1	YNL297C	MON2	0.0704695	-0.615071	0.449867	0.884248	yes	no	yes	no
YMR055C::chr00_5	YMR055C	BUB2	0.0703385	1.24767	0.449985	0.0819231	no	no	no	no
YPL066W::chr16_3	YPL066W	RGL1	0.0701836	-0.0548379	0.450125	0.661994	no	no	no	no
YNL010W::chr14_4	YNL010W	YNL010W	0.0697002	0.587201	0.450561	0.317621	no	no	no	no
YDR530C::chr4_8	YDR530C	APA2	0.0692239	-0.759218	0.45099	0.918766	no	no	no	no
YMR073C::chr00_6	YMR073C	IRC21	0.0689698	-2.42219	0.45122	0.999896	no	no	no	no
YLR258W::chr12_4	YLR258W	GSY2	0.0688786	-0.778577	0.451302	0.922737	no	no	no	no
YKR040C::chr00_14	YKR040C	YKR040C	0.0684348	0.562337	0.451702	0.330039	no	no	no	no
YAL013W::chr1_1	YAL013W	DEP1	0.0679638	-1.57022	0.452127	0.994197	no	no	no	no
YCR076C::chr00_1	YCR076C	FUB1	0.0679295	0.714259	0.452158	0.257543	no	no	no	no
YPL106C::chr16_2	YPL106C	SSE1	0.0674952	2.88223	0.45255	0.000124213	no	yes	no	yes
YOR081C::chr15_1	YOR081C	TGL5	0.0674042	-0.381462	0.452632	0.808351	no	no	no	no
YOR132W::chr15_2	YOR132W	VPS17	0.066717	-0.716204	0.453252	0.909396	no	no	no	no
YHR111W::chr8_2	YHR111W	UBA4	0.0662644	0.479616	0.453661	0.372649	no	no	no	no
YGL063W::chr7_1	YGL063W	PUS2	0.0640242	0.055855	0.455684	0.604139	no	no	no	no
YER047C::chr5_3	YER047C	SAP1	0.0637611	0.37987	0.455921	0.426135	no	no	no	no
YOR065W::chr15_1	YOR065W	CYT1	0.0631079	-1.42256	0.456511	0.989794	no	no	no	no
YOR375C::chr15_4	YOR375C	GDH1	0.0626211	-0.832248	0.456951	0.932974	no	no	no	no
YDL203C::chr4_3	YDL203C	ACK1	0.0625142	-0.0862756	0.457048	0.677816	no	no	no	no
YAR047C::chr1_1	YAR047C	YAR047C	0.0623796	0.38194	0.457169	0.425007	no	no	no	no
YLL063C::chr12_1	YLL063C	AYT1	0.0621159	-0.0268042	0.457408	0.647638	no	no	no	no
YDR462W::chr4_8	YDR462W	MRPL28	0.0621074	-1.00432	0.457415	0.958846	no	no	no	no
YMR086C-A::chr00_6	YMR086C-A	YMR086C-A	0.0615899	0.336744	0.457883	0.449752	no	no	no	no
YOL113W::chr00_6	YOL113W	SKM1	0.0611649	-0.227041	0.458267	0.744484	no	no	no	no
YOL121C::chr00_6	YOL121C	RPS19A	0.0602787	-0.177439	0.459068	0.721833	no	no	no	no
YIL015W::chr9_1	YIL015W	BAR1	0.0600167	-0.0491942	0.459305	0.659122	no	no	no	no
YGL156W::chr7_2	YGL156W	AMS1	0.0598711	-0.463915	0.459436	0.838038	no	no	no	no
YDR095C::chr4_4	YDR095C	YDR095C	0.0598697	-0.402494	0.459438	0.816223	no	no	no	no
YJL206C::chr00_14	YJL206C	YJL206C	0.0598661	0.0508239	0.459441	0.606831	no	no	no	no
YGR221C::chr00_2	YGR221C	TOS2	0.0598418	0.0633598	0.459463	0.600115	no	no	no	no
YKL162C::chr11_2	YKL162C	YKL162C	0.0597761	2.08839	0.459522	0.00522404	no	yes	no	yes
YOR067C::chr15_1	YOR067C	ALG8	0.0596884	-0.733	0.459602	0.913146	no	no	no	no
YCR075C::chr00_16a	YCR075C	ERS1	0.059313	0.00773833	0.459941	0.629657	no	no	no	no
YJL108C::chr10_2	YJL108C	PRM10	0.0590474	0.0847594	0.460181	0.588585	no	no	no	no
YFR025C::chr00_15	YFR025C	HIS2	0.0588633	0.805373	0.460348	0.218413	no	yes	no	yes
YBR178W::chr2_4	YBR178W	YBR178W	0.0586282	0.890518	0.46056	0.185155	no	no	no	no
YPL227C::chr16_1	YPL227C	ALG5	0.0585429	-0.13442	0.460637	0.701427	no	no	no	no
YJL117W::chr10_2	YJL117W	PHO86	0.0575857	4.66927	0.461503	3.93809e-10	no	no	no	yes
YGL025C::chr7_1	YGL025C	PGD1	0.0575452	-2.59932	0.46154	0.999962	no	no	no	no
YDR080W::chr4_4	YDR080W	VPS41	0.0567889	1.08074	0.462224	0.122973	no	yes	no	yes
YLR014C::chr12_1	YLR014C	PPR1	0.0552709	-0.630316	0.463598	0.888327	no	no	no	no
YHR123W::chr8_2	YHR123W	EPT1	0.0552649	0.334903	0.463603	0.450764	no	no	no	no
YJL118W::chr10_2	YJL118W	YJL118W	0.0551835	0.0085211	0.463677	0.629246	no	no	no	no
YDL021W::chr4_1	YDL021W	GPM2	0.05513	0.428965	0.463725	0.399573	no	no	no	no
YPL165C::chr16_2	YPL165C	SET6	0.0550792	-0.736138	0.463771	0.913834	no	no	no	no
YOR364W::chr00_11	YOR364W	YOR364W	0.0547726	0.395568	0.464049	0.417599	no	no	no	no
YMR132C::chr00_9	YMR132C	JLP2	0.0540612	1.20328	0.464693	0.0916674	no	yes	no	yes
YMR223W::chr13_4	YMR223W	UBP8	0.0540167	0.267736	0.464733	0.48788	no	no	no	no
YML082W::chr13_1b	YML082W	YML082W	0.0538723	0.158201	0.464864	0.548488	no	no	no	no
YDR019C::chr4_3	YDR019C	GCV1	0.0538549	-0.502274	0.464879	0.850768	no	no	no	no
YOR216C::chr15_3	YOR216C	RUD3	0.0532422	-0.399778	0.465434	0.815218	no	no	no	no
YPL202C::chr16_1	YPL202C	AFT2	0.0532055	3.59784	0.465467	1.59345e-06	no	no	no	yes
YLR023C::chr12_1	YLR023C	IZH3	0.0531294	-0.206551	0.465536	0.735245	no	no	no	no
YJL022W::chr00_13	YJL022W	YJL022W	0.0529233	-1.12662	0.465723	0.971767	no	no	no	no
YBL101C::chr2_2	YBL101C	ECM21	0.0528092	0.619522	0.465826	0.301783	no	no	no	no
YGL141W::chr7_2	YGL141W	HUL5	0.0525792	0.273417	0.466034	0.484732	no	no	no	no
YOR332W::chr15_4	YOR332W	VMA4	0.051965	-0.106541	0.46659	0.68785	no	no	no	no
YIL053W::chr9_1	YIL053W	RHR2	0.0519368	1.12779	0.466616	0.110166	no	no	no	no
YGR197C::chr7_5	YGR197C	SNG1	0.051255	0.667913	0.467234	0.27876	no	no	no	no
YCL023C::chr3_1/chr00_12	YCL023C	YCL023C	0.0506905	1.70831	0.467745	0.0210557	no	no	no	no
YLR418C::chr12_5	YLR418C	CDC73	0.0504202	0.384431	0.46799	0.423651	no	no	no	no
YDL186W::chr4_2	YDL186W	YDL186W	0.0503784	-0.463289	0.468028	0.837824	no	no	no	no
YDR183W::chr4_5	YDR183W	PLP1	0.050078	0.517056	0.4683	0.353132	no	no	no	no
YOR140W::chr15_2	YOR140W	SFL1	0.0496882	2.21758	0.468653	0.00307034	no	yes	no	yes
YOR346W::chr15_4	YOR346W	REV1	0.0490726	-0.29454	0.469211	0.773685	no	no	no	no
YMR299C::chr13_5	YMR299C	DYN3	0.0488446	0.64841	0.469417	0.287936	no	yes	no	yes
YKR006C::chr11_3	YKR006C	MRPL13	0.0484555	0.0293027	0.46977	0.618284	no	no	no	no
YOR008C::chr15_1	YOR008C	SLG1	0.0483312	-1.40004	0.469882	0.988914	no	no	no	no
YEL020C::chr5_2	YEL020C	YEL020C	0.0481881	-0.455678	0.470012	0.835214	no	no	no	no
YNL252C::chr00_8	YNL252C	MRPL17	0.0476118	-0.969315	0.470534	0.954371	no	no	no	no
YKL008C::chr11_1	YKL008C	LAC1	0.0465197	-0.219981	0.471524	0.741319	no	no	no	no
YFR044C::chr00_2	YFR044C	DUG1	0.0464969	0.375973	0.471545	0.428259	no	no	no	no
YML038C::chr00_11	YML038C	YMD8	0.0459007	0.327384	0.472085	0.454904	no	no	no	no
YLR241W::chr12_4	YLR241W	YLR241W	0.0456432	0.593865	0.472319	0.314327	no	no	no	no
YML122C::chr00_9	YML122C	YML122C	0.045627	1.50964	0.472334	0.0395174	no	yes	no	yes
YOL129W::chr00_6	YOL129W	VPS68	0.0455365	0.607712	0.472416	0.307529	no	no	no	no
YIL064W::chr9_1	YIL064W	SEE1	0.0455004	0.713995	0.472448	0.257661	no	no	no	no
YJL214W::chr10_1	YJL214W	HXT8	0.045481	1.2406	0.472466	0.0834205	no	yes	no	yes
YPR024W::chr00_15	YPR024W	YME1	0.0452082	-1.98995	0.472713	0.999056	yes	no	yes	no
YIL032C::chr9_1	YIL032C	YIL032C	0.0451724	0.880216	0.472746	0.189002	no	no	no	no
YLR211C::chr12_3	YLR211C	YLR211C	0.0448019	0.8054	0.473082	0.218402	no	no	no	no
YLR350W::chr12_5	YLR350W	ORM2	0.0447912	0.966392	0.473091	0.158331	no	no	no	no
YEL011W::chr00_8	YEL011W	GLC3	0.0445303	0.414519	0.473328	0.407346	no	no	no	no
YGR237C::chr00_2	YGR237C	YGR237C	0.0445071	3.58112	0.473349	1.78342e-06	no	no	no	yes
YOR197W::chr15_3	YOR197W	MCA1	0.0437546	0.38865	0.474031	0.421356	no	no	no	no
YPR157W::chr16_5	YPR157W	TDA6	0.0434955	0.683881	0.474266	0.271355	no	no	no	no
YLR192C::chr00_11	YLR192C	HCR1	0.0432902	0.739998	0.474452	0.246133	no	no	no	no
YNL239W::chr14_2	YNL239W	LAP3	0.0431777	-1.24912	0.474555	0.98113	no	no	no	no
YMR289W::chr13_5	YMR289W	ABZ2	0.0427138	-0.274962	0.474975	0.765414	no	no	no	no
YNR040W::chr14_4	YNR040W	YNR040W	0.0426695	0.0809988	0.475015	0.590617	no	no	no	no
YIL146C::chr9_2	YIL146C	ATG32	0.0422208	-0.0199544	0.475422	0.644097	no	no	no	no
YKR087C::chr00_4	YKR087C	OMA1	0.0421418	-0.749512	0.475494	0.916719	no	no	no	no
YMR031C::chr13_2	YMR031C	EIS1	0.042068	0.836614	0.475561	0.205828	no	no	no	no
YNL173C::chr14_2	YNL173C	MDG1	0.0416851	0.601013	0.475908	0.31081	no	no	no	no
YJL180C::chr10_1	YJL180C	ATP12	0.0413344	0.342702	0.476227	0.446476	no	yes	no	yes
YBR100W::chr2_3/chr00_16a	YBR098W	MMS4	0.0411332	0.654097	0.476409	0.285245	no	no	no	no
YLR288C::chr12_4	YLR288C	MEC3	0.0409947	0.165883	0.476535	0.544257	no	no	no	no
YBR145W::chr2_3	YBR145W	ADH5	0.0408598	-0.218911	0.476657	0.740838	no	no	no	no
YGR054W::chr7_4	YGR054W	YGR054W	0.0408277	2.19348	0.476686	0.00339791	no	no	no	no
YDL218W::chr4_3	YDL218W	YDL218W	0.0406259	0.202249	0.476869	0.524171	no	no	no	no
YAR037W::chr1_1	not found	YAR037W	0.0399197	0.802507	0.47751	0.219589	no	no	no	no
YKL175W::chr11_2	YKL175W	ZRT3	0.0396246	0.866623	0.477778	0.194155	no	no	no	no
YHL039W::chr00_10	YHL039W	EFM1	0.0389589	0.19743	0.478382	0.526837	no	no	no	no
YBR072W::chr2_2	YBR072W	HSP26	0.0389239	0.0313761	0.478414	0.617185	no	no	no	no
YBR244W::chr2_4	YBR244W	GPX2	0.0385881	0.359372	0.478718	0.437332	no	no	no	no
YJL165C::chr00_14	YJL165C	HAL5	0.0385445	0.395489	0.478758	0.417642	no	yes	no	yes
YLL049W::chr00_8	YLL049W	LDB18	0.0385445	-0.409073	0.478758	0.818644	no	no	no	no
YOL051W::chr15_5	YOL051W	GAL11	0.0380959	-1.54607	0.479165	0.993619	no	no	no	no
YKR088C::chr00_4	YKR088C	TVP38	0.0379417	-0.650532	0.479305	0.893577	no	no	no	no
YMR234W::chr13_5	YMR234W	RNH1	0.0378805	-0.0787447	0.479361	0.674054	no	no	no	no
YNL305C::chr14_1	YNL305C	BXI1	0.0374937	0.0404902	0.479712	0.612342	no	no	no	no
YMR141C::chr13_4	YMR141C	YMR141C	0.0374605	1.72846	0.479742	0.0196788	no	no	no	no
YOR200W::chr15_3	YOR200W	YOR200W	0.037406	-1.45993	0.479791	0.991121	no	no	no	no
YML129C::chr00_9	YML129C	COX14	0.0372173	-0.197289	0.479962	0.731014	no	no	no	no
YBR184W::chr2_4	YBR184W	YBR184W	0.0367841	0.158753	0.480356	0.548183	no	no	no	no
YJR010W::chr00_13	YJR010W	MET3	0.036449	-0.0631106	0.48066	0.666187	no	no	no	no
YDR163W::chr4_5	YDR163W	CWC15	0.0357334	0.213963	0.481309	0.517686	no	no	no	no
YOR219C::chr15_3	YOR219C	STE13	0.0351404	0.0619097	0.481848	0.600894	no	no	no	no
YBR144C::chr2_3	YBR144C	YBR144C	0.035105	0.537785	0.48188	0.342487	no	no	no	no
YDR125C::chr4_4	YDR125C	ECM18	0.0350241	2.7249	0.481953	0.000285291	no	no	no	yes
YGL035C::chr7_1	YGL035C	MIG1	0.0347164	3.11786	0.482233	3.28504e-05	no	no	no	yes
YDR491C::chr4_8	YDR491C	YDR491C	0.0345507	1.3277	0.482383	0.0663601	no	no	no	no
YML097C::chr00_9	YML097C	VPS9	0.0342826	1.24612	0.482627	0.082251	no	no	no	no
YML037C::chr13_2	YML037C	YML037C	0.0342039	0.145583	0.482698	0.555424	no	no	no	no
YDL155W::chr4_2	YDL155W	CLB3	0.0341853	-0.9427	0.482715	0.950714	no	no	no	no
YHR117W::chr8_2	YHR117W	TOM71	0.0338891	-0.0942768	0.482984	0.681794	no	no	no	no
YJL166W::chr10_1	YJL166W	QCR8	0.0338337	0.590935	0.483034	0.315774	no	no	no	no
YMR318C::chr00_8	YMR318C	ADH6	0.0336165	-0.0399787	0.483231	0.654412	no	no	no	no
YMR271C::chr00_8	YMR271C	URA10	0.0335915	0.574573	0.483254	0.323903	no	no	no	no
YKR053C::chr00_14	YKR053C	YSR3	0.0332919	-0.142456	0.483526	0.70529	no	no	no	no
YDL100C::chr4_2	YDL100C	GET3	0.0331722	-0.556675	0.483635	0.867647	no	no	no	no
YIL156W::chr9_2	YIL156W	UBP7	0.0327134	0.357829	0.484051	0.438177	no	no	no	no
YOR308C::chr15_4	YOR308C	SNU66	0.0326434	-2.95395	0.484115	0.999996	no	no	no	no
YGR271W::chr00_17a	YGR271W	SLH1	0.0320741	1.30468	0.484632	0.0705819	no	no	no	no
YLR138W::chr12_3	YLR138W	NHA1	0.0316927	-0.464228	0.484978	0.838144	no	no	no	no
YIR001C::chr9_2	YIR001C	SGN1	0.0316706	-0.397452	0.484998	0.814355	no	no	no	no
YNL294C::chr14_1	YNL294C	RIM21	0.0314742	2.65564	0.485177	0.000405563	no	yes	no	yes
YJL103C::chr00_18	YJL103C	GSM1	0.0308567	0.637494	0.485738	0.293133	no	yes	no	yes
YKL041W::chr11_1	YKL041W	VPS24	0.0302374	0.817703	0.4863	0.213394	no	yes	no	yes
[truncated: 2,102 more rows]

## Sheet: flight
Strain	ORF	Gene	Log2ratio, 14G	Log2ratio, 21G	P, 14G	P, 21G	Drops out, 14G	Drops out, 21G	Significant, 14G	Significant, 21G
YLR228C::chr12_4	YLR228C	ECM22	2.83176	-0.247782	1.2878e-09	0.709094	no	no	yes	no
YBR015C::chr2_2	YBR015C	MNN2	1.89161	-0.303078	3.31741e-05	0.755467	yes	no	yes	no
YDL192W::chr4_3	YDL192W	ARF1	1.70154	0.836409	0.000164563	0.0133808	no	no	yes	no
YHR125W::chr8_2	YHR125W	YHR125W	1.65236	0.140954	0.000243054	0.32964	yes	no	yes	no
YPL106C::chr16_2	YPL106C	SSE1	1.60616	2.17289	0.000347414	9.31488e-09	no	yes	yes	yes
YHR059W::chr00_10	YHR059W	FYV4	1.60192	2.03204	0.000358835	7.01014e-08	no	yes	yes	yes
YJL119C::chr10_2	YJL119C	YJL119C	1.5077	0.650968	0.000722363	0.0407606	no	no	yes	no
YOR027W::chr15_1	YOR027W	STI1	1.48423	-0.229403	0.000855047	0.692818	yes	no	yes	no
YOR264W::chr15_3	YOR264W	DSE3	1.48367	0.638342	0.000858467	0.0436589	yes	no	yes	no
YJR047C::chr00_13	YJR047C	ANB1	1.45023	0.626057	0.00108733	0.0466364	no	no	no	no
YGR261C::chr00_3	YGR261C	APL6	1.40577	0.876384	0.00147821	0.0102531	no	no	no	no
YDR535C::chr00_2	YDR535C	YDR535C	1.37638	-0.00638198	0.00180298	0.474063	yes	no	yes	no
YJL096W::chr10_2	YJL096W	MRPL49	1.36322	0.201029	0.00196842	0.276204	yes	no	yes	no
YJR073C::chr10_4	YJR073C	OPI3	1.34182	0.694662	0.00226702	0.0319133	no	no	no	no
YNL199C::chr14_2	YNL199C	GCR2	1.32604	0.919154	0.00251289	0.00763195	no	no	no	no
YGR138C::chr7_5	YGR138C	TPO2	1.27287	0.688658	0.00352905	0.0330259	no	no	no	no
YJL075C::chr10_2	YJL075C	APQ13	1.27248	1.15937	0.00353776	0.00118748	no	no	no	no
YGL002W::chr7_1	YGL002W	ERP6	1.25893	0.88237	0.00385036	0.00984454	no	no	no	no
YJL129C::chr00_14	YJL129C	TRK1	1.25381	1.25381	0.00397484	0.000519514	yes	yes	yes	yes
YKL121W::chr11_2	YKL121W	DGR2	1.23468	1.30055	0.0044722	0.000338205	no	no	no	yes
YCL058C::chr00_12	YCL058C	FYV5	1.20767	1.89901	0.00526916	4.20462e-07	no	no	no	yes
YEL009C::chr5_2	YEL009C	GCN4	1.20137	1.01526	0.00547243	0.00377887	no	no	no	no
YDL184C::chr4_2	YDL184C	RPL41A	1.18658	0.40345	0.005977	0.133387	no	no	no	no
YCR008W::chr3_1	YCR008W	SAT4	1.18493	0.563127	0.00603576	0.0645262	no	no	no	no
YBR191W::chr00_11	YBR191W	RPL21A	1.1775	1.1775	0.00630657	0.00101744	yes	yes	yes	yes
YEL029C::chr5_2	YEL029C	BUD16	1.17704	1.26686	0.00632394	0.00046143	no	yes	no	yes
YGL105W::chr7_2	YGL105W	ARC1	1.16311	1.43438	0.00686256	9.18745e-05	no	yes	no	yes
YKR010C::chr00_14	YKR010C	TOF2	1.16001	0.968887	0.0069875	0.00534118	no	no	no	no
YDR035W::chr4_3	YDR035W	ARO3	1.14007	1.07726	0.00784227	0.00233201	no	no	no	no
YPL180W::chr16_2	YPL180W	TCO89	1.12887	1.62098	0.00836194	1.24126e-05	no	no	no	yes
YPL206C::chr16_1	YPL206C	PGC1	1.12589	0.337928	0.00850504	0.172744	yes	no	yes	no
YER156C::chr00_5	YER156C	YER156C	1.11888	1.33541	0.00885034	0.000243415	no	no	no	yes
YML121W::chr00_9	YML121W	GTR1	1.10851	1.10939	0.00938367	0.00179948	no	yes	no	yes
YDL191W::chr4_3	YDL191W	RPL35A	1.10693	1.16383	0.00946769	0.00114336	no	yes	no	yes
YNL226W::chr14_2	YNL226W	YNL226W	1.10493	1.41062	0.00957451	0.000116722	no	no	no	yes
YBR262C::chr2_4	YBR262C	AIM5	1.10252	0.468424	0.00970474	0.100931	no	no	no	no
YCR107W::chr00_17a	YCR107W	AAD3	1.08672	0.2047	0.0105972	0.273082	no	no	no	no
YOR014W::chr15_1	YOR014W	RTS1	1.0843	0.75111	0.0107399	0.0228917	no	no	no	no
YMR126C::chr00_9	YMR126C	DLT1	1.07732	0.850134	0.0111608	0.0122248	yes	no	yes	no
YPL216W::chr16_1	YPL216W	YPL216W	1.05298	0.698543	0.0127446	0.0312108	no	no	no	no
YPL019C::chr16_3	YPL019C	VTC3	1.0528	-0.650603	0.012757	0.942753	yes	no	yes	no
YIL023C::chr9_1	YIL023C	YKE4	1.04736	0.322196	0.0131372	0.183198	yes	no	yes	no
YAL009W::chr1_1	YAL009W	SPO7	1.04272	0.55213	0.0134685	0.0681388	no	no	no	no
YCL005W::chr3_1	YCL005W	LDB16	1.04168	0.065089	0.013544	0.402307	no	no	no	no
YGL135W::chr7_2	YGL135W	RPL1B	1.03622	1.03622	0.0139452	0.00321815	yes	yes	yes	yes
YJL062W::chr10_2	YJL062W	LAS21	1.03622	0.991507	0.0139452	0.00451885	yes	no	yes	no
YLR063W::chr12_2	YLR063W	YLR063W	1.02786	-0.23461	0.0145798	0.69747	yes	no	yes	no
YIL136W::chr9_2	YIL136W	OM45	1.0185	-0.0473562	0.0153194	0.515739	no	no	no	no
YMR267W::chr13_5	YMR267W	PPA2	1.0047	1.4082	0.0164681	0.000119584	no	no	no	yes
YMR179W::chr13_4	YMR179W	SPT21	0.994196	1.49077	0.0173915	5.13296e-05	no	no	no	yes
YLR381W::chr12_5	YLR381W	CTF3	0.978407	0.904737	0.0188624	0.00844072	no	no	no	no
YJR105W::chr10_4	YJR105W	ADO1	0.976529	1.07214	0.0190442	0.00242888	no	no	no	no
YER166W::chr00_5	YER166W	DNF1	0.974246	0.132593	0.0192672	0.337397	no	no	no	no
YNL025C::chr14_4	YNL025C	SSN8	0.96794	2.15241	0.0198948	1.25887e-08	no	no	no	yes
YKL127W::chr11_2	YKL127W	PGM1	0.967039	0.549269	0.0199858	0.069104	no	no	no	no
YDL211C::chr4_3	YDL211C	YDL211C	0.966634	0.669663	0.0200269	0.0367577	no	no	no	no
YGR148C::chr7_5	YGR148C	RPL24B	0.963053	1.10936	0.0203929	0.0017999	no	no	no	no
YHR066W::chr8_2	YHR066W	SSF1	0.956062	1.54926	0.021124	2.74839e-05	no	yes	no	yes
YGL125W::chr7_2	YGL125W	MET13	0.949908	0.695577	0.0217858	0.0317465	no	no	no	no
YKL006W::chr11_1	YKL006W	RPL14A	0.949724	1.28107	0.0218058	0.000405096	no	yes	no	yes
YGL144C::chr7_2	YGL144C	ROG1	0.948861	0.5801	0.0219001	0.0592446	no	no	no	no
YBL047C::chr2_1	YBL047C	EDE1	0.945771	1.23095	0.0222405	0.00063777	no	yes	no	yes
YGR238C::chr00_14	YGR238C	KEL2	0.942072	0.334121	0.0226537	0.175238	no	no	no	no
YKR048C::chr11_3	YKR048C	NAP1	0.938762	0.205352	0.023029	0.272529	no	no	no	no
YJL107C::chr10_2	YJL107C	YJL107C	0.938701	0.435803	0.0230359	0.116424	no	no	no	no
YKR057W::chr11_3	YKR057W	RPS21A	0.936432	1.56724	0.0232963	2.25859e-05	no	no	no	yes
YLR270W::chr12_4	YLR270W	DCS1	0.933967	1.07891	0.0235819	0.00230153	no	no	no	no
YDL199C::chr4_3	YDL199C	YDL199C	0.930914	0.269149	0.0239396	0.221266	no	no	no	no
YPR061C::chr16_4	YPR061C	JID1	0.923442	0.245747	0.0248346	0.239402	no	no	no	no
YDR159W::chr4_5	YDR159W	SAC3	0.922565	2.08541	0.0249415	3.31151e-08	no	yes	no	yes
YHR064C::chr00_8	YHR064C	SSZ1	0.91825	1.55282	0.0254731	2.64411e-05	no	yes	no	yes
YDL117W::chr4_2	YDL117W	CYK3	0.917979	0.845816	0.0255067	0.0125788	no	no	no	no
YMR269W::chr13_5	YMR269W	TMA23	0.91646	1.65144	0.0256963	8.77093e-06	no	yes	no	yes
YJR055W::chr00_17b	YJR055W	HIT1	0.916041	0.959143	0.0257487	0.00573462	no	yes	no	yes
YML060W::chr13_1b	YML060W	OGG1	0.91245	0.385828	0.0262023	0.143309	no	no	no	no
YJL028W::chr00_13	YJL028W	YJL028W	0.911576	0.63492	0.0263137	0.0444724	no	no	no	no
YOR189W::chr15_2	YOR189W	IES4	0.909594	1.18901	0.0265677	0.000921426	no	no	no	yes
YLL043W::chr12_1	YLL043W	FPS1	0.905372	0.291999	0.0271158	0.204341	yes	no	yes	no
YKR011C::chr11_3	YKR011C	YKR011C	0.899848	0.337006	0.0278471	0.173346	no	no	no	no
YDR132C::chr4_4	YDR132C	YDR132C	0.898001	0.16373	0.0280952	0.308887	no	no	no	no
YDL172C::chr4_2	YDL172C	YDL172C	0.886994	0.54983	0.0296125	0.0689138	yes	no	yes	no
YJR059W::chr00_13	YJR059W	PTK2	0.880094	0.465992	0.0305978	0.102031	no	no	no	no
YGL114W::chr7_2	YGL114W	YGL114W	0.880025	0.562561	0.0306078	0.0647086	no	no	no	no
YOR274W::chr00_17b	YOR274W	MOD5	0.878471	0.838702	0.0308334	0.0131813	no	no	no	no
YOR008C::chr15_1	YOR008C	SLG1	0.873551	1.40721	0.0315571	0.000120766	no	no	no	yes
YJL128C::chr00_15	YJL128C	PBS2	0.870658	0.622888	0.0319891	0.0474302	no	no	no	no
YDL083C::chr4_1	YDL083C	RPS16B	0.870202	1.5088	0.0320576	4.2436e-05	no	no	no	yes
YLR387C::chr12_5	YLR387C	REH1	0.869793	0.766159	0.0321192	0.0208865	no	no	no	no
YPL118W::chr16_2	YPL118W	MRP51	0.867478	1.31607	0.0324696	0.00029241	no	no	no	yes
YCR020W-B::chr00_1	YCR020W-B	HTL1	0.85797	2.01677	0.0339419	8.66013e-08	no	yes	no	yes
YML081C-A::chr00_4	YML081C-A	ATP18	0.857966	-0.00198651	0.0339424	0.469601	no	no	no	no
YGL063W::chr7_1	YGL063W	PUS2	0.85786	0.71825	0.0339591	0.0278382	no	no	no	no
YLR055C::chr12_2	YLR055C	SPT8	0.855181	0.79879	0.034384	0.0170447	no	no	no	no
YNL035C::chr14_4	YNL035C	YNL035C	0.852159	0.135095	0.0348684	0.335068	no	no	no	no
YPL125W::chr16_2	YPL125W	KAP120	0.846433	1.75134	0.0358015	2.69614e-06	no	yes	no	yes
YOR001W::chr15_1	YOR001W	RRP6	0.842661	2.0082	0.0364275	9.74386e-08	no	no	no	yes
YGL162W::chr7_2	YGL162W	SUT1	0.842238	0.567177	0.0364982	0.0632339	no	no	no	no
YOR309C::chr15_4/chr00_12	YOR309C	YOR309C	0.839484	1.4527	0.0369615	7.62041e-05	no	no	no	yes
YDL238C::chr4_3	YDL238C	GUD1	0.835986	0.236626	0.0375569	0.246684	no	no	no	no
YCR045C::chr00_1	YCR045C	RRT12	0.825969	0.323661	0.0393052	0.182208	no	no	no	no
YDR161W::chr4_5	YDR161W	YDR161W	0.825698	1.19523	0.0393535	0.000873085	no	no	no	yes
YGL078C::chr7_1	YGL078C	DBP3	0.825227	1.68684	0.0394373	5.81589e-06	no	no	no	yes
YDL040C::chr4_1	YDL040C	NAT1	0.825155	0.571182	0.0394503	0.0619758	no	no	no	no
YGR027C::chr7_4	YGR027C	RPS25A	0.819817	1.07009	0.0404115	0.00246879	no	no	no	no
YER095W::chr00_8	YER095W	RAD51	0.818536	1.24933	0.0406451	0.000540936	no	no	no	yes
YDL035C::chr4_1	YDL035C	GPR1	0.816924	1.80925	0.0409404	1.32233e-06	no	no	no	yes
YNL183C::chr14_2	YNL183C	NPR1	0.816706	0.531035	0.0409805	0.0755036	no	no	no	no
YDR126W::chr4_4	YDR126W	SWF1	0.816305	0.909869	0.0410543	0.00814459	no	no	no	no
YPL270W::chr16_1	YPL270W	MDL2	0.812609	0.382002	0.0417396	0.145528	no	no	no	no
YLR299W::chr12_4	YLR299W	ECM38	0.812007	0.544884	0.0418522	0.0706032	no	no	no	no
YLR269C::chr12_4	YLR269C	YLR269C	0.811862	0.445688	0.0418793	0.111561	no	no	no	no
YJR010W::chr00_13	YJR010W	MET3	0.811677	0.459071	0.0419141	0.105211	no	no	no	no
YGR078C::chr7_4	YGR078C	PAC10	0.810793	1.49509	0.0420798	4.90505e-05	no	no	no	yes
YPR197C::chr16_5	YPR197C	YPR197C	0.806416	0.804806	0.0429088	0.0164066	no	no	no	no
YJL080C::chr10_2	YJL080C	SCP160	0.806416	0.829878	0.0429088	0.0139632	no	no	no	no
YDR020C::chr4_3	YDR020C	DAS2	0.804807	0.527037	0.0432169	0.0769651	no	no	no	no
YEL061C::chr5_2	YEL061C	CIN8	0.801285	0.672665	0.0438975	0.0361459	no	no	no	no
YPL239W::chr16_1	YPL239W	YAR1	0.799843	2.38921	0.0441786	3.28517e-10	no	no	no	yes
YFL027C::chr6_1	YFL027C	GYP8	0.796637	0.281602	0.0448089	0.211944	no	no	no	no
YFL040W::chr6_1	YFL040W	YFL040W	0.79225	0.320251	0.0456828	0.184517	no	no	no	no
YJR032W::chr00_13	YJR032W	CPR7	0.792203	1.34281	0.0456923	0.000226776	no	yes	no	yes
YGL014W::chr7_1	YGL014W	PUF4	0.79135	0.612513	0.0458638	0.0501057	no	no	no	no
YMR007W::chr13_2	YMR007W	YMR007W	0.789784	0.469252	0.0461802	0.100558	no	no	no	no
YHR129C::chr8_2	YHR129C	ARP1	0.787688	0.655622	0.0466063	0.0397325	no	no	no	no
YKL201C::chr00_14	YKL201C	MNN4	0.785788	0.476482	0.0469952	0.097346	no	no	no	no
YDR174W::chr00_14	YDR174W	HMO1	0.784847	2.05922	0.0471889	4.79524e-08	no	no	no	yes
YDR533C::chr4_8	YDR533C	HSP31	0.783844	0.35454	0.047396	0.162127	no	no	no	no
YJR091C::chr00_12	YJR091C	JSN1	0.782278	0.109481	0.0477207	0.359191	no	no	no	no
YDL198C::chr4_3	YDL198C	GGC1	0.782199	1.87305	0.0477372	5.88686e-07	no	yes	no	yes
YIL074C::chr9_1	YIL074C	SER33	0.7813	0.35454	0.0479244	0.162127	no	no	no	no
YBR238C::chr2_4	YBR238C	YBR238C	0.780254	0.513538	0.0481431	0.0820597	no	no	no	no
YFR011C::chr00_16b	YFR011C	AIM13	0.780008	0.370245	0.0481947	0.152489	no	no	no	no
YER132C::chr00_5	YER132C	PMD1	0.777728	0.692094	0.0486743	0.0323854	no	no	no	no
YDR005C::chr4_3	YDR005C	MAF1	0.775504	0.43371	0.049146	0.117473	no	no	no	no
YIL110W::chr9_2	YIL110W	HPM1	0.773829	0.988669	0.0495038	0.00461541	no	no	no	no
YGL143C::chr7_2	YGL143C	MRF1	0.773502	1.38295	0.0495738	0.000153584	no	yes	no	yes
YKL092C::chr11_1	YKL092C	BUD2	0.770181	0.729421	0.0502897	0.0260652	no	no	no	no
YPL247C::chr16_1	YPL247C	YPL247C	0.763649	0.35321	0.0517222	0.162961	no	no	no	no
YMR194W::chr13_4	YMR194W	RPL36A	0.762673	1.14908	0.051939	0.00129511	no	no	no	no
YCL060C::chr3_1	YCL061C	MRC1	0.760326	0.562392	0.0524631	0.064763	no	no	no	no
YPR049C::chr16_4	YPR049C	ATG11	0.756585	0.858177	0.0533075	0.0115885	no	no	no	no
YFR015C::chr6_1	YFR015C	GSY1	0.752788	0.198946	0.0541754	0.277984	no	no	no	no
YGL148W::chr7_2	YGL148W	ARO2	0.752468	1.34306	0.0542491	0.000226242	no	yes	no	yes
YER090W::chr00_8	YER090W	TRP2	0.751338	0.251622	0.0545097	0.234774	yes	no	yes	no
YIL012W::chr9_1	YIL012W	YIL012W	0.74965	0.766512	0.0549013	0.0208413	no	no	no	no
YDL130W::chr4_2	YDL130W	RPP1B	0.748651	0.712245	0.0551338	0.0288322	no	no	no	no
YML063W::chr13_1b	YML063W	RPS1B	0.741349	1.06111	0.0568579	0.00265035	no	no	no	no
YDR450W::chr4_8	YDR450W	RPS18A	0.74098	2.29245	0.0569462	1.52145e-09	no	no	no	yes
YBR287W::chr00_16a	YBR287W	YBR287W	0.739734	0.672616	0.057245	0.0361559	no	no	no	no
YML086C::chr00_11	YML086C	ALO1	0.739234	0.29309	0.0573651	0.203553	yes	no	yes	no
YHR105W::chr8_2	YHR105W	YPT35	0.738097	0.625437	0.0576394	0.046791	no	no	no	no
YPL170W::chr16_2	YPL170W	DAP1	0.73625	0.366442	0.0580868	0.154787	no	no	no	no
YDR010C::chr4_3	YDR010C	YDR010C	0.735474	0.519525	0.0582756	0.0797698	no	no	no	no
YIL008W::chr9_1	YIL008W	URM1	0.733351	1.45874	0.0587949	7.16188e-05	no	no	no	yes
YDR488C::chr4_8	YDR488C	PAC11	0.73286	0.73161	0.0589154	0.025729	no	no	no	no
YJL108C::chr10_2	YJL108C	PRM10	0.732345	0.506028	0.0590422	0.0850017	no	no	no	no
YOR270C::chr00_17b	YOR270C	VPH1	0.730626	0.691273	0.0594664	0.0325375	no	no	no	no
YPR021C::chr00_18	YPR021C	AGC1	0.729904	-0.15761	0.0596453	0.625787	no	no	no	no
YJR074W::chr00_12	YJR074W	MOG1	0.728843	0.610629	0.0599093	0.0506042	no	no	no	no
YGR200C::chr7_5	YGR200C	ELP2	0.727017	1.26473	0.0603652	0.000470499	no	no	no	yes
YBR170C::chr2_3	YBR170C	NPL4	0.726915	0.444404	0.0603907	0.112184	no	no	no	no
YPL130W::chr16_2	YPL130W	SPO19	0.726833	0.863667	0.0604114	0.0111707	no	no	no	no
YMR230W::chr13_4	YMR230W	RPS10B	0.725953	1.52864	0.0606322	3.43398e-05	no	no	no	yes
YOR252W::chr15_3	YOR252W	TMA16	0.725328	0.038804	0.0607894	0.428448	no	no	no	no
YGR283C::chr00_3	YGR283C	YGR283C	0.724839	0.799181	0.0609128	0.0170025	no	no	no	no
YOR195W::chr15_3	YOR195W	SLK19	0.724364	0.317865	0.0610326	0.186144	no	no	no	no
YML036W::chr00_11	YML036W	CGI121	0.722972	1.17289	0.0613851	0.00105847	no	yes	no	yes
YOR049C::chr15_1	YOR049C	RSB1	0.72026	0.21015	0.0620765	0.268478	no	no	no	no
YKL031W::chr11_1	YKL031W	YKL031W	0.71836	0.245667	0.0625643	0.239465	no	no	no	no
YOR139C::chr15_2	YOR139C	YOR139C	0.717897	0.956758	0.0626838	0.00583477	no	no	no	no
YOL039W::chr15_5	YOL039W	RPP2A	0.715234	0.980368	0.0633736	0.00490848	no	no	no	no
YLR402W::chr12_5	YLR402W	YLR402W	0.714422	1.39146	0.0635853	0.00014123	no	no	no	yes
YGL126W::chr7_2	YGL126W	SCS3	0.712362	-0.234061	0.0641244	0.696981	no	no	no	no
YCR079W::chr00_1	YCR079W	PTC6	0.710753	0.499418	0.0645479	0.0876562	no	no	no	no
YDL218W::chr4_3	YDL218W	YDL218W	0.706388	0.81612	0.065708	0.015262	no	no	no	no
YFL036W::chr6_1	YFL036W	RPO41	0.703323	1.576	0.0665321	2.05129e-05	no	no	no	yes
YGR170W::chr7_5	YGR170W	PSD2	0.70105	0.175699	0.0671484	0.298215	no	no	no	no
YHR194W::chr00_10	YHR194W	MDM31	0.700266	2.03842	0.0673621	6.41549e-08	no	no	no	yes
YJL020C::chr00_13	YJL020C	BBC1	0.697877	0.222477	0.0680161	0.258212	no	no	no	no
YPL207W::chr16_1	YPL207W	TYW1	0.697583	0.139845	0.068097	0.330664	no	no	no	no
YEL031W::chr5_2	YEL031W	SPF1	0.695369	1.32019	0.0687083	0.000281255	no	no	no	yes
YDR494W::chr4_8	YDR494W	RSM28	0.692477	0.412308	0.0695129	0.128582	no	no	no	no
YPR139C::chr16_5	YPR139C	LOA1	0.69239	1.87567	0.0695372	5.69194e-07	no	no	no	yes
YLR267W::chr12_4	YLR267W	BOP2	0.690454	0.0784158	0.07008	0.389211	no	no	no	no
YGR133W::chr7_5	YGR133W	PEX4	0.689563	0.684689	0.070331	0.0337787	no	no	no	no
YFR032C-A::chr00_2	YFR032C-A	RPL29	0.68841	1.50286	0.0706568	4.51893e-05	no	no	no	yes
YPR076W::chr16_4	YPR076W	YPR076W	0.687353	0.0806449	0.0709565	0.387033	no	no	no	no
YNL254C::chr14_1	YNL254C	RTC4	0.687022	0.52782	0.0710504	0.0766772	no	no	no	no
YPL245W::chr16_1	YPL245W	YPL245W	0.686157	0.411684	0.0712967	0.128917	no	no	no	no
YDL041W::chr4_1	YDL041W	YDL041W	0.683481	1.26804	0.0720625	0.000456522	no	no	no	yes
YDR495C::chr4_8	YDR495C	VPS3	0.683081	1.76941	0.0721773	2.16364e-06	no	no	no	yes
YNL253W::chr14_1	YNL253W	TEX1	0.682325	0.104619	0.0723952	0.363838	no	no	no	no
YPR150W::chr16_5	YPR150W	YPR150W	0.679915	0.364968	0.0730925	0.155684	no	no	no	no
YDR150W::chr4_5	YDR150W	NUM1	0.677183	1.10172	0.0738896	0.00191542	no	no	no	no
YDR028C::chr4_3	YDR028C	REG1	0.676726	0.757023	0.0740235	0.0220853	no	no	no	no
YER016W::chr5_3	YER016W	BIM1	0.675963	0.895653	0.0742475	0.00898814	no	no	no	no
YOR053W::chr15_1	YOR053W	YOR053W	0.675691	0.498522	0.0743276	0.0880206	no	no	no	no
YDR017C::chr4_3	YDR017C	KCS1	0.674176	0.764002	0.0747743	0.0211645	no	yes	no	yes
YJR135C::chr10_4	YJR135C	MCM22	0.672876	0.159036	0.0751593	0.313118	no	no	no	no
YPR046W::chr16_4	YPR046W	MCM16	0.672256	0.385679	0.0753435	0.143395	no	no	no	no
YLR027C::chr12_1	YLR027C	AAT2	0.67124	1.62837	0.075646	1.14155e-05	no	no	no	yes
YGR266W::chr00_3	YGR266W	YGR266W	0.670355	0.236146	0.0759102	0.247071	no	no	no	no
YLR185W::chr12_3	YLR185W	RPL37A	0.668532	1.36136	0.0764567	0.000189634	no	no	no	yes
YJL047C::chr10_2	YJL047C	RTT101	0.666	0.700178	0.0772209	0.0309188	no	no	no	no
YGR106C::chr00_14	YGR106C	VOA1	0.665729	-0.246696	0.077303	0.708143	no	no	no	no
YLR046C::chr12_2	YLR046C	YLR046C	0.664185	0.208908	0.077772	0.269523	no	no	no	no
YKL110C::chr11_2	YKL110C	KTI12	0.663683	0.827125	0.077925	0.0142153	no	no	no	no
YAL027W::chr1_1	YAL027W	SAW1	0.660102	0.729191	0.0790231	0.0261006	no	no	no	no
YDL135C::chr4_2	YDL135C	RDI1	0.65986	0.13497	0.0790977	0.335185	no	no	no	no
YLL028W::chr12_1	YLL028W	TPO1	0.659807	0.35347	0.079114	0.162797	no	no	no	no
YJL024C::chr00_13	YJL024C	APS3	0.659439	0.861478	0.0792278	0.0113357	no	no	no	no
YOR078W::chr15_1	YOR078W	BUD21	0.658532	1.00643	0.0795082	0.0040403	no	yes	no	yes
YLR014C::chr12_1	YLR014C	PPR1	0.655651	-0.0716076	0.0804041	0.540354	no	no	no	no
YDR134C::chr4_4	YDR134C	YDR134C	0.655208	0.591163	0.0805426	0.0559887	no	no	no	no
YMR221C::chr13_4	YMR221C	YMR221C	0.655034	-0.0867402	0.080597	0.555642	no	no	no	no
YGL066W::chr7_1	YGL066W	SGF73	0.654092	1.32394	0.0808924	0.000271452	no	no	no	yes
YGR197C::chr7_5	YGR197C	SNG1	0.653669	0.377312	0.0810251	0.148279	no	no	no	no
YJL123C::chr10_2	YJL123C	MTC1	0.652707	0.513374	0.0813276	0.0821231	no	no	no	no
YBR297W::chr00_1	YBR297W	MAL33	0.652441	0.0803204	0.0814116	0.387349	no	no	no	no
YNL031C::chr14_4	YNL031C	HHT2	0.652346	0.685766	0.0814414	0.0335729	no	no	no	no
YHR003C::chr00_10	YHR003C	YHR003C	0.651913	0.640422	0.0815781	0.0431704	no	no	no	no
YDL082W::chr4_1	YDL082W	RPL13A	0.650026	1.33353	0.0821757	0.000247807	no	no	no	yes
YKL079W::chr11_1	YKL079W	SMY1	0.648466	0.735283	0.082672	0.0251731	no	no	no	no
YLR006C::chr12_1	YLR006C	SSK1	0.645952	0.0255574	0.0834768	0.441749	no	no	no	no
YPL116W::chr16_2	YPL116W	HOS3	0.645821	0.386439	0.0835189	0.142957	no	no	no	no
YJL200C::chr00_14	YJL200C	ACO2	0.645698	-0.261379	0.0835582	0.720869	no	no	no	no
YGR208W::chr7_5	YGR208W	SER2	0.643593	0.692383	0.0842373	0.0323319	no	no	no	no
YGL025C::chr7_1	YGL025C	PGD1	0.643194	0.379883	0.0843664	0.146766	no	no	no	no
YJR082C::chr10_4	YJR082C	EAF6	0.642257	1.05958	0.0846701	0.00268239	no	no	no	no
YHR034C::chr8_1	YHR034C	PIH1	0.642155	1.28955	0.0847031	0.000374588	no	no	no	yes
YKL033W-A::chr00_3	YKL033W-A	YKL033W-A	0.641545	0.244116	0.0849017	0.240695	no	no	no	no
YDL067C::chr4_1	YDL067C	COX9	0.63905	0.697413	0.0857163	0.031414	no	no	no	no
YML116W::chr00_9	YML116W	ATR1	0.635055	0.545851	0.0870331	0.0702706	no	no	no	no
YFR022W::chr6_1	YFR022W	ROG3	0.634797	-0.01871	0.0871186	0.486593	no	no	no	no
YKL188C::chr11_2	YKL188C	PXA2	0.634614	0.145734	0.0871792	0.325238	no	no	no	no
YPR193C::chr16_5	YPR193C	HPA2	0.634438	-0.0049653	0.0872378	0.472624	no	no	no	no
YJR145C::chr00_12	YJR145C	RPS4A	0.634178	0.897579	0.0873241	0.00886957	no	no	no	no
YKR065C::chr11_3	YKR065C	PAM17	0.632528	0.28607	0.0878738	0.208657	no	no	no	no
YCL057W::chr3_1	YCL057W	PRD1	0.631442	0.31239	0.088237	0.189909	no	no	no	no
YJL166W::chr10_1	YJL166W	QCR8	0.629572	1.34611	0.0888647	0.000219709	no	no	no	yes
YOR345C::chr15_4	YOR345C	YOR345C	0.62921	0.195824	0.0889868	0.280662	no	no	no	no
YNL229C::chr14_2	YNL229C	URE2	0.628685	0.900822	0.0891636	0.00867294	no	no	no	no
YMR139W::chr00_11	YMR139W	RIM11	0.628414	-0.0148883	0.0892552	0.482707	no	no	no	no
YLR264W::chr12_4	YLR264W	RPS28B	0.626944	2.04732	0.0897529	5.66625e-08	no	no	no	yes
YPR059C::chr16_4	YPR059C	YPR059C	0.623959	0.313513	0.0907694	0.189133	yes	no	yes	no
YGR134W::chr00_8	YGR134W	CAF130	0.623752	0.494733	0.0908403	0.0895747	no	no	no	no
YDL056W::chr4_1	YDL056W	MBP1	0.623269	1.10238	0.0910057	0.0019051	no	no	no	no
YDR085C::chr4_4	YDR085C	AFR1	0.621725	0.472621	0.091536	0.0990521	no	no	no	no
YEL018W::chr5_2	YEL018W	EAF5	0.620412	-0.0487922	0.0919887	0.517199	no	no	no	no
YDR493W::chr00_17a	YDR493W	MZM1	0.616976	-0.289316	0.093181	0.74431	no	no	no	no
YNL069C::chr00_18	YNL069C	RPL16B	0.616776	1.11535	0.0932507	0.00171373	no	no	no	no
YDR140W::chr4_4	YDR140W	MTQ2	0.615406	0.615406	0.0937299	0.0493479	yes	yes	yes	yes
YKR084C::chr00_3	YKR084C	HBS1	0.614228	1.0137	0.094143	0.00382399	no	no	no	no
YGL151W::chr7_2	YGL151W	NUT1	0.614024	0.955991	0.0942148	0.00586732	no	no	no	no
YOR141C::chr15_2	YOR141C	ARP8	0.614024	1.83997	0.0942148	8.98519e-07	no	no	no	yes
YKL175W::chr11_2	YKL175W	ZRT3	0.6139	-0.0427212	0.0942584	0.511025	no	no	no	no
YOR265W::chr00_17b	YOR265W	RBL2	0.613111	0.013116	0.0945361	0.454302	no	no	no	no
YDL081C::chr4_1	YDL081C	RPP1A	0.612176	2.23565	0.0948661	3.63923e-09	no	no	no	yes
YMR107W::chr00_9	YMR107W	SPG4	0.612156	0.34887	0.0948731	0.165702	no	no	no	no
YGR081C::chr7_4	YGR081C	SLX9	0.611874	1.30623	0.0949729	0.000320701	no	no	no	yes
YDL136W::chr4_2	YDL136W	RPL35B	0.611724	0.6912	0.095026	0.032551	no	no	no	no
YGL108C::chr7_2	YGL108C	YGL108C	0.61123	0.782998	0.0952006	0.0188211	no	no	no	no
YKL136W::chr11_2	YKL136W	YKL136W	0.609971	0.222145	0.0956475	0.258486	no	no	no	no
YCR101C::chr00_2	YCR101C	YCR101C	0.609531	0.225858	0.0958041	0.255432	no	no	no	no
YOR106W::chr15_2	YOR106W	VAM3	0.609115	1.35143	0.0959522	0.000208739	no	no	no	yes
YDL129W::chr4_2	YDL129W	YDL129W	0.608222	0.412932	0.0962709	0.128249	no	no	no	no
YPR116W::chr16_5	YPR116W	RRG8	0.607693	1.09885	0.0964599	0.00196055	no	no	no	no
YNL304W::chr14_1	YNL304W	YPT11	0.607168	0.237727	0.0966478	0.245799	no	no	no	no
YDR009W::chr4_3	YDR009W	GAL3	0.606852	0.265976	0.0967611	0.223678	no	no	no	no
YBR151W::chr2_3	YBR151W	APD1	0.606852	0.794324	0.0967611	0.0175318	no	no	no	no
YIR017C::chr00_3	YIR017C	MET28	0.606852	-0.107926	0.0967611	0.576902	no	no	no	no
YDR071C::chr00_11	YDR071C	PAA1	0.606587	0.189481	0.0968561	0.28614	no	no	no	no
YDL090C::chr4_1	YDL090C	RAM1	0.60651	1.68308	0.0968839	6.07772e-06	no	no	no	yes
YGL166W::chr7_2	YGL166W	CUP2	0.605902	0.24027	0.0971022	0.243761	no	no	no	no
YHR111W::chr8_2	YHR111W	UBA4	0.603145	0.940354	0.098097	0.00656662	no	no	no	no
YDL168W::chr4_2	YDL168W	SFA1	0.6013	-0.0455231	0.0987666	0.513875	no	no	no	no
YFL063W::chr00_18	YFL063W	YFL063W	0.60046	0.527714	0.0990728	0.0767161	no	no	no	no
YMR312W::chr00_8	YMR312W	ELP6	0.598893	1.21072	0.0996458	0.000762632	no	no	no	yes
YPL101W::chr16_2	YPL101W	ELP4	0.598415	0.907857	0.0998209	0.00825959	no	no	no	no
YLR455W::chr00_15	YLR455W	YLR455W	0.597731	-0.253077	0.100072	0.713706	no	no	no	no
YDR014W::chr4_3	YDR014W	RAD61	0.597485	0.545883	0.100162	0.0702596	no	no	no	no
YLR439W::chr00_15	YLR439W	MRPL4	0.596287	1.12777	0.100604	0.00154709	no	no	no	no
YCL074W::chr00_12	YCL074W	YCL074W	0.595749	0.0123207	0.100803	0.455106	no	no	no	no
YGL131C::chr7_2	YGL131C	SNT2	0.595292	0.413999	0.100971	0.127679	no	no	no	no
YDL137W::chr4_2	YDL137W	ARF2	0.592362	0.207609	0.102059	0.270619	no	no	no	no
YDL049C::chr4_1	YDL049C	KNH1	0.591879	0.0564589	0.102239	0.410848	no	no	no	no
YDR530C::chr4_8	YDR530C	APA2	0.590296	0.161111	0.102831	0.311244	no	no	no	no
YML097C::chr00_9	YML097C	VPS9	0.58994	1.19877	0.102965	0.000846642	no	no	no	yes
YOL147C::chr00_15	YOL147C	PEX11	0.588946	-0.107822	0.103339	0.576797	no	no	no	no
YNL180C::chr14_2	YNL180C	RHO5	0.588903	0.276819	0.103355	0.215497	no	no	no	no
YOL001W::chr15_5	YOL001W	PHO80	0.58885	0.298838	0.103375	0.199429	no	no	no	no
YNL335W::chr14_1	YNL335W	DDI3	0.588588	0.0849527	0.103473	0.382832	no	no	no	no
YJL179W::chr10_1	YJL179W	PFD1	0.588145	1.12632	0.10364	0.00156575	no	no	no	no
YOR327C::chr15_4	YOR327C	SNC2	0.587495	0.374091	0.103885	0.150188	no	no	no	no
YLR238W::chr12_4	YLR238W	FAR10	0.585835	0.410272	0.104514	0.129676	no	no	no	no
YGR085C::chr7_4	YGR085C	RPL11B	0.585514	0.31329	0.104635	0.189287	no	no	no	no
YER059W::chr5_3	YER059W	PCL6	0.585157	0.527689	0.104771	0.0767252	no	no	no	no
YIL158W::chr9_2	YIL158W	AIM20	0.584733	-0.133806	0.104932	0.602564	no	no	no	no
YDR198C::chr4_5	YDR198C	RKM2	0.582772	0.0115012	0.10568	0.455935	no	no	no	no
YPL157W::chr16_2	YPL157W	TGS1	0.581602	1.25799	0.106128	0.000500215	no	no	no	yes
YHR008C::chr00_10	YHR008C	SOD2	0.580857	0.59835	0.106414	0.0539503	no	no	no	no
YDR380W::chr4_7	YDR380W	ARO10	0.578718	-0.0465165	0.107238	0.514885	no	no	no	no
YIL005W::chr9_1	YIL005W	EPS1	0.578239	0.04313	0.107423	0.424121	no	no	no	no
YOL020W::chr15_5	YOL020W	TAT2	0.578147	0.473185	0.107459	0.0988014	no	no	no	no
YDR137W::chr4_4	YDR137W	RGP1	0.577105	0.395182	0.107863	0.137982	no	no	no	no
YER067C-A::chr5_3	YER067C-A	YER067C-A	0.576478	-0.0525273	0.108106	0.520996	no	no	no	no
YKL056C::chr11_1	YKL056C	TMA19	0.575609	0.983488	0.108445	0.00479646	no	no	no	no
YGR168C::chr7_5	YGR168C	YGR168C	0.573616	0.119216	0.109223	0.349951	no	no	no	no
YOR012W::chr15_1	YOR012W	YOR012W	0.573575	0.321087	0.109239	0.183949	no	no	no	no
YDL241W::chr4_3	YDL241W	YDL241W	0.572087	0.132776	0.109823	0.337226	no	no	no	no
YBR077C::chr2_2	YBR077C	SLM4	0.570873	0.767909	0.110301	0.0206633	no	no	no	no
YDR210W::chr4_5	YDR210W	YDR210W	0.569882	0.144103	0.110692	0.326737	no	no	no	no
YOR109W::chr15_2	YOR109W	INP53	0.569873	0.480089	0.110695	0.0957722	no	no	no	no
YGL154C::chr7_2	YGL154C	LYS5	0.568997	0.0600929	0.111042	0.407246	no	no	no	no
YMR023C::chr13_2	YMR023C	MSS1	0.568321	0.215556	0.11131	0.26395	no	no	no	no
YML109W::chr00_9	YML109W	ZDS2	0.567681	0.200884	0.111564	0.276328	no	no	no	no
YMR060C::chr00_4	YMR060C	SAM37	0.566853	1.01677	0.111894	0.00373574	no	yes	no	yes
YEL004W::chr5_2	YEL004W	YEA4	0.56679	0.393359	0.111919	0.139009	no	no	no	no
YDR024W::chr4_3	YDR024W	FYV1	0.56611	1.37638	0.11219	0.000163815	no	yes	no	yes
YEL015W::chr5_2	YEL015W	EDC3	0.56611	0.446333	0.11219	0.111249	no	no	no	no
YOR379C::chr15_4	YOR379C	YOR379C	0.565835	0.205153	0.1123	0.272697	no	no	no	no
YBR291C::chr00_1	YBR291C	CTP1	0.565356	0.441725	0.112491	0.113493	no	no	no	no
YER123W::chr00_5	YER123W	YCK3	0.56526	0.281912	0.11253	0.211715	no	no	no	no
YCR006C::chr3_1	YCR006C	YCR006C	0.563949	0.198271	0.113055	0.278561	no	no	no	no
YGL003C::chr7_1	YGL003C	CDH1	0.563417	0.876045	0.113269	0.0102768	no	no	no	no
YGR088W::chr7_4	YGR088W	CTT1	0.563314	-0.249838	0.11331	0.710889	no	no	no	no
YJL093C::chr10_2	YJL093C	TOK1	0.562605	0.497481	0.113595	0.0884456	no	no	no	no
YOL152W::chr00_17b/chr00_18	YOL152W	FRE7	0.56133	0.0880311	0.11411	0.379839	no	no	no	no
YLR015W::chr12_1	YLR015W	BRE2	0.560872	-0.108826	0.114294	0.5778	no	no	no	no
YFL011W::chr6_1	YFL011W	HXT10	0.56065	0.247074	0.114384	0.238352	no	no	no	no
YLR426W::chr00_4	YLR426W	TDA5	0.560552	0.965113	0.114424	0.0054906	no	no	no	no
YMR097C::chr00_9	YMR097C	MTG1	0.559483	0.843201	0.114857	0.0127975	no	no	no	no
YGR064W::chr7_4	YGR064W	YGR064W	0.559234	1.15902	0.114958	0.00119096	no	no	no	no
YFL028C::chr6_1	YFL028C	CAF16	0.558743	0.44655	0.115158	0.111144	no	no	no	no
YDL115C::chr4_2	YDL115C	IWR1	0.558564	1.2184	0.115231	0.000712786	no	yes	no	yes
YGR037C::chr7_4	YGR037C	ACB1	0.558489	1.11834	0.115261	0.00167218	no	no	no	no
YGL009C::chr7_1	YGL009C	LEU1	0.557153	0.166066	0.115806	0.306791	no	no	no	no
YGL147C::chr7_2	YGL147C	RPL9A	0.556983	0.838947	0.115875	0.0131601	no	no	no	no
YMR242C::chr13_5	YMR242C	RPL20A	0.555788	0.543865	0.116364	0.0709554	yes	no	yes	no
YLR337C::chr12_5	YLR337C	VRP1	0.555113	0.906421	0.116641	0.00834256	no	no	no	no
YMR036C::chr13_2	YMR036C	MIH1	0.555003	0.242207	0.116686	0.242214	no	no	no	no
YJR056C::chr00_13	YJR056C	YJR056C	0.554942	0.153394	0.116711	0.318234	no	no	no	no
YKL011C::chr11_1	YKL011C	CCE1	0.553672	0.49728	0.117233	0.0885276	no	no	no	no
YGL167C::chr7_2	YGL167C	PMR1	0.552374	0.191516	0.117768	0.284377	no	no	no	no
YML095C-A::chr00_9	YML094C-A	YML094C-A	0.552288	1.80857	0.117804	1.33358e-06	no	no	no	yes
YLR342W::chr12_5	YLR342W	FKS1	0.552125	0.807853	0.117871	0.0160914	no	no	no	no
YIL060W::chr9_1	YIL060W	YIL060W	0.551331	0.592839	0.1182	0.055508	no	no	no	no
YPR087W::chr16_4	YPR087W	VPS69	0.550856	0.753602	0.118397	0.0225489	no	no	no	no
YKL113C::chr11_2	YKL113C	RAD27	0.547021	1.18355	0.119995	0.000965882	no	no	no	yes
YOL062C::chr15_5	YOL062C	APM4	0.546091	0.829449	0.120384	0.0140022	no	no	no	no
YDL107W::chr4_2	YDL107W	MSS2	0.545697	0.390296	0.12055	0.140748	yes	no	yes	no
YDL025C::chr4_1	YDL025C	RTK1	0.545233	0.493247	0.120745	0.0901897	no	no	no	no
YLR354C::chr12_5	YLR354C	TAL1	0.544723	0.341531	0.120959	0.170404	no	no	no	no
YDR456W::chr4_8	YDR456W	NHX1	0.544413	0.659314	0.12109	0.038932	no	no	no	no
YML081W::chr13_1b	YML081W	TDA9	0.544247	0.334456	0.12116	0.175018	no	no	no	no
YDL089W::chr4_1	YDL089W	NUR1	0.543811	-0.159656	0.121344	0.627763	no	no	no	no
YLR366W::chr12_5	YLR366W	YLR366W	0.542568	0.97386	0.121869	0.00514977	no	no	no	no
YOR382W::chr15_4	YOR382W	FIT2	0.541328	0.173968	0.122395	0.299748	no	no	no	no
YMR132C::chr00_9	YMR132C	JLP2	0.541099	-0.083066	0.122492	0.551937	no	no	no	no
YGR219W::chr00_2	YGR219W	YGR219W	0.539425	0.924673	0.123205	0.00734088	no	no	no	no
YGL010W::chr7_1	YGL010W	YGL010W	0.539063	0.0526454	0.123359	0.414636	no	no	no	no
YCR003W::chr3_1	YCR003W	MRPL32	0.537464	-0.0214277	0.124043	0.489358	no	no	no	no
YLR017W::chr12_1	YLR017W	MEU1	0.535993	0.00952854	0.124674	0.457931	no	no	no	no
YNL264C::chr14_1	YNL264C	PDR17	0.535583	0.406291	0.124851	0.131833	no	no	no	no
YNL314W::chr14_1	YNL314W	DAL82	0.535193	-0.0145004	0.125018	0.482312	no	no	no	no
YCL050C::chr3_1	YCL050C	APA1	0.534449	0.120563	0.125339	0.348678	no	no	no	no
YPL162C::chr16_2	YPL162C	YPL162C	0.534379	0.0501977	0.125369	0.417071	no	no	no	no
YBR204C::chr2_4	YBR204C	LDH1	0.532486	0.352588	0.126189	0.163352	no	no	no	no
YJL215C::chr10_1	YJL215C	YJL215C	0.531947	-0.00664728	0.126422	0.474332	no	no	no	no
YBR137W::chr2_3	YBR137W	YBR137W	0.531455	0.34864	0.126637	0.165848	no	no	no	no
YHR110W::chr8_2	YHR110W	ERP5	0.531271	-0.373118	0.126716	0.807976	no	no	no	no
YPR106W::chr16_5	YPR106W	ISR1	0.531246	1.01173	0.126727	0.00388134	no	no	no	no
YNR045W::chr14_4	YNR045W	PET494	0.530943	0.573494	0.126859	0.0612586	no	no	no	no
YPL194W::chr00_18	YPL194W	DDC1	0.530602	0.179838	0.127008	0.294565	no	no	no	no
YKL032C::chr11_1	YKL032C	IXR1	0.528554	0.358821	0.127902	0.159461	no	no	no	no
YDL044C::chr4_1	YDL044C	MTF2	0.527842	0.927222	0.128214	0.00720981	no	no	no	no
YOR047C::chr15_1	YOR047C	STD1	0.527592	0.520083	0.128324	0.0795586	no	no	no	no
YLL058W::chr12_1	YLL058W	YLL058W	0.527362	0.240383	0.128425	0.24367	no	no	no	no
YJR039W::chr00_13	YJR039W	YJR039W	0.527117	0.0757432	0.128532	0.391828	no	no	no	no
YLR192C::chr00_11	YLR192C	HCR1	0.52579	1.55677	0.129116	2.53273e-05	no	no	no	yes
YIL140W::chr9_2	YIL140W	AXL2	0.524756	0.413637	0.129572	0.127872	no	no	no	no
YDR083W::chr4_4	YDR083W	RRP8	0.524437	1.10873	0.129713	0.00180917	no	no	no	no
YHL037C::chr8_1	YHL037C	YHL037C	0.52439	0.278773	0.129734	0.214042	no	no	no	no
YMR190C::chr13_4	YMR190C	SGS1	0.524071	1.06456	0.129875	0.00257924	no	no	no	no
YPL138C::chr16_2	YPL138C	SPP1	0.523218	-0.0731825	0.130253	0.541949	no	no	no	no
YNR049C::chr14_4	YNR049C	MSO1	0.521963	0.514481	0.13081	0.0816956	no	no	no	no
YJL036W::chr10_2	YJL036W	SNX4	0.521107	0.274399	0.131191	0.217308	no	no	no	no
YGL168W::chr7_2	YGL168W	HUR1	0.520091	1.10957	0.131644	0.00179672	no	no	no	no
YGR177C::chr7_5	YGR177C	ATF2	0.519693	0.421384	0.131822	0.123785	no	no	no	no
YOR235W::chr15_3	YOR235W	IRC13	0.519294	0.949694	0.132	0.00614057	no	no	no	no
YDL216C::chr4_3	YDL216C	RRI1	0.518845	0.347561	0.132201	0.166534	no	no	no	no
YJL088W::chr10_2	YJL088W	ARG3	0.517697	-0.176685	0.132716	0.644075	no	no	no	no
YNR073C::chr00_6	YNR073C	YNR073C	0.515934	0.0850448	0.133509	0.382743	no	no	no	no
YKL002W::chr11_1	YKL002W	DID4	0.514844	0.37637	0.134002	0.148835	no	no	no	no
YCR014C::chr3_1	YCR014C	POL4	0.514002	0.400896	0.134383	0.134795	no	no	no	no
YGR057C::chr7_4	YGR057C	LST7	0.513677	0.985307	0.13453	0.00473216	no	no	no	no
YDR032C::chr4_3	YDR032C	PST2	0.513049	-0.106342	0.134815	0.575319	no	no	no	no
YOR183W::chr15_2	YOR183W	FYV12	0.512215	1.00436	0.135194	0.00410367	no	no	no	no
YHR009C::chr00_10	YHR009C	TDA3	0.511536	0.435245	0.135503	0.116704	no	no	no	no
YPL078C::chr00_17b	YPL078C	ATP4	0.507996	1.19066	0.137122	0.000908421	no	no	no	yes
YCR021C::chr3_1	YCR021C	HSP30	0.507488	0.435577	0.137356	0.116537	no	no	no	no
YFL007W::chr00_17a	YFL007W	BLM10	0.507166	0.178569	0.137504	0.295682	no	no	no	no
YGR282C::chr00_3	YGR282C	BGL2	0.506196	0.674158	0.137951	0.0358448	no	no	no	no
YCL022C::chr00_12	YCL022C	YCL022C	0.504326	0.437088	0.138815	0.115784	no	no	no	no
YEL040W::chr5_2	YEL040W	UTR2	0.504298	0.288968	0.138828	0.206541	no	no	no	no
YEL017W::chr5_2	YEL017W	GTT3	0.503551	0.308943	0.139174	0.192303	no	no	no	no
YKR053C::chr00_14	YKR053C	YSR3	0.503452	0.185878	0.13922	0.289274	no	no	no	no
YML001W::chr13_2	YML001W	YPT7	0.503082	0.816404	0.139392	0.0152343	no	no	no	no
YHR041C::chr00_10	YHR041C	SRB2	0.50272	1.74625	0.13956	2.86744e-06	no	yes	no	yes
YLR246W::chr00_11	YLR246W	ERF2	0.5022	0.568665	0.139802	0.0627641	no	no	no	no
YGR225W::chr00_2	YGR225W	AMA1	0.501761	0.094075	0.140006	0.373983	no	no	no	no
YDL133C-A::chr00_14	YDL133C-A	RPL41B	0.500569	0.462793	0.140562	0.103492	no	no	no	no
YKL130C::chr11_2	YKL130C	SHE2	0.499329	0.310611	0.141142	0.191143	no	no	no	no
YDR074W::chr00_11	YDR074W	TPS2	0.499314	0.707036	0.141149	0.029718	no	no	no	no
YIR020W-B::chr00_3	YIR020W-A	YIR020W-A	0.499266	0.0106418	0.141172	0.456805	no	no	no	no
YGL129C::chr7_2	YGL129C	RSM23	0.498982	1.02241	0.141305	0.00357838	no	no	no	no
YPR194C::chr16_5	YPR194C	OPT2	0.498821	-0.529663	0.14138	0.897922	no	no	no	no
YAL023C::chr1_1	YAL023C	PMT2	0.498599	0.681538	0.141484	0.0343864	no	no	no	no
YJL138C::chr10_1	YJL138C	TIF2	0.498553	0.0326122	0.141506	0.434656	no	no	no	no
YMR178W::chr13_4	YMR178W	YMR178W	0.497831	0.143991	0.141845	0.32684	no	no	no	no
YMR315W::chr00_8	YMR315W	YMR315W	0.497396	0.574271	0.14205	0.0610189	no	no	no	no
YJL178C::chr10_1	YJL178C	ATG27	0.496709	0.0808069	0.142373	0.386874	no	no	no	no
YDR203W::chr4_5	YDR203W	YDR203W	0.496578	0.833579	0.142435	0.0136306	no	no	no	no
YDR185C::chr4_5	YDR185C	UPS3	0.4965	-0.245065	0.142471	0.706713	no	no	no	no
YOR369C::chr15_4	YOR369C	RPS12	0.496409	0.496409	0.142514	0.0888846	yes	yes	yes	yes
YJL057C::chr10_2	YJL057C	IKS1	0.495052	0.481548	0.143155	0.095141	no	no	no	no
YDR003W::chr4_3	YDR003W	RCR2	0.493787	0.466407	0.143754	0.101843	no	no	no	no
YLL021W::chr12_1	YLL021W	SPA2	0.493394	0.526721	0.143941	0.0770815	no	no	no	no
YMR003W::chr13_2	YMR003W	AIM34	0.493134	0.37733	0.144064	0.148268	no	no	no	no
YOR032C::chr15_1	YOR032C	HMS1	0.491333	0.01115	0.144921	0.45629	no	no	no	no
YNL228W::chr14_2	YNL228W	YNL228W	0.490875	1.53432	0.145139	3.23046e-05	no	no	no	yes
YCL012W::chr3_1	YCL014W	BUD3	0.490674	0.287185	0.145236	0.207841	no	no	no	no
YFR008W::chr6_1	YFR008W	FAR7	0.489532	0.136928	0.145782	0.333366	no	no	no	no
YER055C::chr5_3	YER055C	HIS1	0.488934	0.5801	0.146068	0.0592446	no	no	no	no
YBR277C::chr00_1	YBR277C	YBR277C	0.485974	0.327265	0.147491	0.179787	no	no	no	no
YPL178W::chr16_2	YPL178W	CBC2	0.484733	1.86749	0.148091	6.32366e-07	no	no	no	yes
YDR069C::chr4_4	YDR069C	DOA4	0.484696	1.07364	0.148109	0.00240013	no	no	no	no
YLR200W::chr12_3	YLR200W	YKE2	0.484589	1.17666	0.148161	0.00102484	no	no	no	no
YIL027C::chr9_1	YIL027C	EMC5	0.484271	0.7684	0.148315	0.0206011	no	no	no	no
YCL026C::chr3_1	deleted	YCL026C	0.484161	0.0846068	0.148368	0.383169	no	no	no	no
YML084W::chr13_1b	YML084W	YML084W	0.483524	-0.0693425	0.148677	0.53806	no	no	no	no
YMR237W::chr13_5	YMR237W	BCH1	0.482352	-0.380548	0.149246	0.813111	no	no	no	no
YDR519W::chr4_8	YDR519W	FPR2	0.482105	1.51175	0.149366	4.11272e-05	no	no	no	yes
YJL003W::chr00_13	YJL003W	COX16	0.482039	1.27088	0.149398	0.0004448	no	no	no	yes
YGR273C::chr00_17a	YGR273C	YGR273C	0.481942	0.540552	0.149446	0.072109	no	no	no	no
YGR049W::chr7_4	YGR049W	SCM4	0.481689	0.325311	0.149569	0.181097	no	no	no	no
YJL181W::chr10_1	YJL181W	YJL181W	0.481444	0.236244	0.149688	0.246992	no	no	no	no
YMR009W::chr13_2	YMR009W	ADI1	0.480964	0.338287	0.149922	0.17251	no	no	no	no
YPL174C::chr16_2	YPL174C	NIP100	0.480824	0.934667	0.14999	0.00683864	no	no	no	no
YLR412W::chr12_5	YLR412W	BER1	0.480079	1.39998	0.150354	0.000129785	no	no	no	yes
YEL003W::chr5_2	YEL003W	GIM4	0.479813	1.03601	0.150484	0.00322334	no	no	no	no
YBR042C::chr2_2	YBR042C	CST26	0.479528	-0.00982311	0.150624	0.477558	no	no	no	no
YDR419W::chr4_7	YDR419W	RAD30	0.478649	0.271142	0.151054	0.219758	no	no	no	no
YPL184C::chr16_2	YPL184C	MRN1	0.478046	0.74251	0.15135	0.0241088	no	no	no	no
YBR267W::chr2_4	YBR267W	REI1	0.476774	0.764123	0.151975	0.0211488	no	no	no	no
YHR134W::chr8_2	YHR134W	WSS1	0.47574	0.586752	0.152485	0.0572696	no	no	no	no
YNL004W::chr14_4	YNL004W	HRB1	0.475282	0.767965	0.152711	0.0206562	no	no	no	no
YJL132W::chr00_14	YJL132W	YJL132W	0.475024	0.138654	0.152838	0.331767	no	no	no	no
YHR061C::chr8_2	YHR061C	GIC1	0.472719	0.22719	0.15398	0.254341	no	no	no	no
YKL046C::chr11_1	YKL046C	DCW1	0.471836	0.232344	0.154419	0.250143	no	no	no	no
YCR081W::chr00_1	YCR081W	SRB8	0.470144	1.56201	0.155262	2.39182e-05	no	no	no	yes
YDR033W::chr4_3	YDR033W	MRH1	0.469767	0.473185	0.15545	0.0988014	no	no	no	no
YER186C::chr00_5	YER186C	YER186C	0.469608	0.189852	0.15553	0.285818	no	no	no	no
YDR026C::chr4_3	YDR026C	NSI1	0.469536	0.0700121	0.155566	0.397456	no	no	no	no
YDR100W::chr4_4	YDR100W	TVP15	0.468733	0.274449	0.155968	0.21727	no	no	no	no
YPR054W::chr16_4	YPR054W	SMK1	0.468497	0.36192	0.156086	0.15755	no	no	no	no
YBR103W::chr2_3	YBR103W	SIF2	0.467135	1.57266	0.156769	2.12801e-05	no	no	no	yes
YER001W::chr5_2	YER001W	MNN1	0.466647	0.209758	0.157015	0.268807	no	no	no	no
YPR145W::chr16_5	YPR145W	ASN1	0.46662	0.247301	0.157028	0.238172	no	no	no	no
YDR046C::chr4_3	YDR046C	BAP3	0.466309	0.219233	0.157185	0.260893	no	no	no	no
YDL050C::chr4_1	YDL050C	YDL050C	0.46538	-0.221961	0.157653	0.686116	no	no	no	no
YNR028W::chr14_4	YNR028W	CPR8	0.465301	0.343287	0.157692	0.169271	no	no	no	no
YLR292C::chr12_4	YLR292C	SEC72	0.465101	0.0362416	0.157793	0.431015	no	no	no	no
YAL011W::chr1_1	YAL011W	SWC3	0.464833	0.992316	0.157929	0.00449166	no	no	no	no
YML124C::chr00_9	YML124C	TUB3	0.464692	0.553444	0.158	0.0676991	no	no	no	no
YIL120W::chr9_2	YIL120W	QDR1	0.463445	0.261169	0.15863	0.22736	no	no	no	no
YCL008C::chr3_1	YCL008C	STP22	0.462995	0.657347	0.158858	0.0393567	no	no	no	no
YGL115W::chr7_2	YGL115W	SNF4	0.462979	0.501661	0.158867	0.0867487	no	no	no	no
YKL207W::chr11_3	YKL207W	EMC3	0.462462	-0.0310465	0.159129	0.499145	no	no	no	no
YCR095C::chr00_14	YCR095C	OCA4	0.461746	0.294971	0.159492	0.202198	no	no	no	no
YMR193C-A::chr13_4	YMR193C-A	YMR193C-A	0.461072	1.22642	0.159835	0.000663954	no	no	no	yes
YOR284W::chr15_3	YOR284W	HUA2	0.460612	-0.0543398	0.160069	0.522838	no	no	no	no
YCR027C::chr00_1	YCR027C	RHB1	0.460136	0.171397	0.160312	0.302032	no	no	no	no
YNL336W::chr14_1	YNL336W	COS1	0.460069	-0.0767713	0.160346	0.545579	no	no	no	no
YFL035C-B::chr6_1	YFL034C-A	RPL22B	0.459379	0.171775	0.160698	0.301696	no	no	no	no
YHL003C::chr8_1	YHL003C	LAG1	0.45871	0.172435	0.16104	0.301109	no	no	no	no
YPL196W::chr16_1	YPL196W	OXR1	0.458225	-0.0597691	0.161288	0.528352	no	no	no	no
YPL265W::chr16_1	YPL265W	DIP5	0.456868	-0.286848	0.161984	0.742281	no	no	no	no
YML094W::chr00_9	YML094W	GIM5	0.456626	1.70922	0.162108	4.46729e-06	no	no	no	yes
YGR038W::chr00_14	YGR038W	ORM1	0.455685	0.187172	0.162591	0.288147	no	no	no	no
YJL122W::chr10_2	YJL122W	ALB1	0.455656	0.549452	0.162606	0.0690419	no	no	no	no
YGR124W::chr7_5	YGR124W	ASN2	0.455451	0.325469	0.162712	0.180991	no	no	no	no
YER109C::chr00_5	YER109C	FLO8	0.455326	0.174933	0.162776	0.298894	no	no	no	no
YMR274C::chr13_5	YMR274C	RCE1	0.455045	0.0598336	0.162921	0.407503	no	no	no	no
YKL150W::chr11_2	YKL150W	MCR1	0.454905	0.211092	0.162993	0.267687	no	no	no	no
YLL006W::chr12_1	YLL006W	MMM1	0.454748	1.24763	0.163074	0.000549315	no	no	no	yes
YAL013W::chr1_1	YAL013W	DEP1	0.454324	0.272746	0.163293	0.218549	no	no	no	no
YDL179W::chr4_2	YDL179W	PCL9	0.453861	0.0803613	0.163532	0.38731	no	no	no	no
YDR093W::chr4_4	YDR093W	DNF2	0.453463	0.30253	0.163738	0.196808	no	no	no	no
YBR075W::chr00_18	YBR074W	YBR074W	0.452738	0.575897	0.164113	0.0605198	no	no	no	no
YGR163W::chr7_5	YGR163W	GTR2	0.452491	1.4989	0.164241	4.71215e-05	no	no	no	yes
YPR184W::chr16_5	YPR184W	GDB1	0.452395	0.321161	0.16429	0.183899	no	no	no	no
YCR066W::chr00_1	YCR066W	RAD18	0.45172	0.690119	0.16464	0.0327523	no	no	no	no
YDR184C::chr4_5	YDR184C	ATC1	0.451662	0.490649	0.16467	0.091272	no	no	no	no
YDR506C::chr4_8	YDR506C	GMC1	0.451574	-0.0929187	0.164716	0.561861	no	no	no	no
YML106W::chr00_9	YML106W	URA5	0.451574	0.205761	0.164716	0.272182	no	no	no	no
YLR460C::chr00_4	YLR460C	YLR460C	0.451361	0.179826	0.164826	0.294575	no	no	no	no
YLR280C::chr12_4	YLR280C	YLR280C	0.450191	0.257427	0.165435	0.23025	no	no	no	no
YLR304C::chr12_4	YLR304C	ACO1	0.449535	0.624734	0.165776	0.0469665	no	no	no	no
YDR202C::chr00_14	YDR202C	RAV2	0.448632	0.62662	0.166247	0.0464965	no	no	no	no
YDL047W::chr4_1	YDL047W	SIT4	0.447081	0.447081	0.167058	0.110887	yes	yes	yes	yes
YGR206W::chr7_5	YGR206W	MVB12	0.4468	0.230552	0.167205	0.251599	no	no	no	no
YGR068C::chr7_4	YGR068C	ART5	0.445808	0.36202	0.167726	0.157488	no	no	no	no
YKL071W::chr11_1	YKL071W	YKL071W	0.44576	0.0571421	0.167751	0.41017	no	no	no	no
YPL173W::chr16_2	YPL173W	MRPL40	0.445465	1.66846	0.167906	7.20604e-06	no	no	no	yes
YOR215C::chr15_3	YOR215C	AIM41	0.445232	0.104273	0.168028	0.364169	no	no	no	no
YKR074W::chr00_3	YKR074W	AIM29	0.444591	1.01637	0.168365	0.00374703	no	no	no	no
YLR351C::chr12_5	YLR351C	NIT3	0.444208	0.186183	0.168567	0.289009	no	no	no	no
YGR023W::chr7_3	YGR023W	MTL1	0.44404	0.134308	0.168656	0.3358	no	no	no	no
YIL009W::chr9_1	YIL009W	FAA3	0.443985	0.00963882	0.168685	0.457819	no	no	no	no
YML090W::chr00_9	YML090W	YML090W	0.443196	0.428177	0.169101	0.120278	no	no	no	no
YPR006C::chr16_4	YPR006C	ICL2	0.442537	0.118953	0.169449	0.350199	no	no	no	no
YNL143C::chr14_3	YNL143C	YNL143C	0.442375	-0.0374353	0.169535	0.505647	no	no	no	no
YGR121C::chr7_4	YGR121C	MEP1	0.441755	0.0452739	0.169862	0.42198	no	no	no	no
YNL168C::chr14_2	YNL168C	FMP41	0.441732	-0.002631	0.169874	0.470255	no	no	no	no
YPR050C::chr00_15	YPR050C	YPR050C	0.441161	0.509507	0.170177	0.0836292	no	no	no	no
YDR157W::chr4_5	YDR157W	YDR157W	0.440384	0.471294	0.170589	0.0996431	no	no	no	no
YDR025W::chr4_3	YDR025W	RPS11A	0.440216	0.573986	0.170678	0.0611067	no	yes	no	yes
YDR171W::chr4_5	YDR171W	HSP42	0.439881	0.469114	0.170856	0.10062	no	no	no	no
YDL187C::chr4_2	YDL187C	YDL187C	0.439501	0.414232	0.171058	0.127555	no	no	no	no
YMR084W::chr00_6	YMR084W	YMR084W	0.438588	0.286544	0.171544	0.20831	no	no	no	no
YKL050C::chr11_1	YKL050C	YKL050C	0.438531	0.26084	0.171575	0.227614	no	no	no	no
YOR296W::chr15_4	YOR296W	YOR296W	0.438153	0.298346	0.171776	0.19978	no	no	no	no
YDL240W::chr4_3	YDL240W	LRG1	0.437899	0.762914	0.171911	0.0213059	no	no	no	no
YDR080W::chr4_4	YDR080W	VPS41	0.437899	0.33959	0.171911	0.171662	no	no	no	no
YJL124C::chr10_2	YJL124C	LSM1	0.436969	1.04379	0.172408	0.00303481	no	no	no	no
YDL230W::chr4_3	YDL230W	PTP1	0.436325	-0.0143089	0.172752	0.482118	no	no	no	no
YLR082C::chr12_2	YLR082C	SRL2	0.435806	-0.296695	0.17303	0.750326	no	no	no	no
YIL054W::chr9_1	YIL054W	YIL054W	0.435806	0.27362	0.17303	0.217892	no	no	no	no
YDR529C::chr4_8	YDR529C	QCR7	0.435086	0.765897	0.173416	0.0209201	no	no	no	no
YJR111C::chr10_4	YJR111C	YJR111C	0.43504	0.146327	0.173441	0.324694	no	no	no	no
YHR139C-A::chr8_2	YHR139C-A	YHR139C-A	0.43483	0.0130971	0.173553	0.454321	no	no	no	no
YER091C-A::chr00_2	YER091C-A	YER091C-A	0.434675	0.270581	0.173636	0.220182	no	no	no	no
YJL141C::chr00_14	YJL141C	YAK1	0.432748	0.25719	0.174673	0.230434	no	no	no	no
YML082W::chr13_1b	YML082W	YML082W	0.432745	0.180935	0.174674	0.293601	no	no	no	no
YLR395C::chr12_5	YLR395C	COX8	0.432434	0.484909	0.174842	0.0936983	no	no	no	no
YGL051W::chr7_1	YGL051W	MST27	0.432121	0.0196148	0.175011	0.447739	no	no	no	no
YJR008W::chr00_13	YJR008W	MHO1	0.432078	-0.278974	0.175034	0.735753	no	no	no	no
YOR121C::chr15_2	YOR121C	YOR121C	0.431653	0.131729	0.175264	0.338202	no	no	no	no
YKL091C::chr11_1	YKL091C	YKL091C	0.431589	0.647018	0.175298	0.04165	no	no	no	no
YOR142W::chr15_2	YOR142W	LSC1	0.431255	0.302937	0.175479	0.19652	no	no	no	no
YLR013W::chr12_1	YLR013W	GAT3	0.431244	0.0713445	0.175484	0.396145	no	no	no	no
YJR062C::chr00_13	YJR062C	NTA1	0.430634	0.518751	0.175815	0.080063	no	no	no	no
YIL036W::chr9_1	YIL036W	CST6	0.429544	0.255224	0.176405	0.231961	no	no	no	no
YGR033C::chr7_4	YGR033C	TIM21	0.428854	0.37098	0.176779	0.152047	no	no	no	no
YGL045W::chr7_1	YGL045W	RIM8	0.428328	0.269802	0.177065	0.220771	no	no	no	no
YDR068W::chr4_4	YDR068W	DOS2	0.427987	0.44765	0.17725	0.110613	no	no	no	no
YNL283C::chr14_1	YNL283C	WSC2	0.427905	-0.678303	0.177295	0.950424	no	no	no	no
YLR191W::chr12_3	YLR191W	PEX13	0.427487	0.153955	0.177522	0.317725	no	no	no	no
YDR220C::chr4_5	YDR220C	YDR220C	0.427483	-0.20924	0.177525	0.674516	no	no	no	no
YMR307W::chr13_5	YMR307W	GAS1	0.427483	0.696492	0.177525	0.0315805	no	no	no	no
YLR043C::chr12_2	YLR043C	TRX1	0.426501	-0.0300435	0.178059	0.498124	no	no	no	no
YJL134W::chr10_1	YJL134W	LCB3	0.426358	-0.095248	0.178137	0.564202	no	no	no	no
YKL043W::chr11_1	YKL043W	PHD1	0.426291	0.156957	0.178174	0.314999	no	no	no	no
YMR183C::chr13_4	YMR183C	SSO2	0.424688	0.362907	0.17905	0.156944	no	no	no	no
YDL002C::chr4_1	YDL002C	NHP10	0.424666	0.612819	0.179062	0.0500251	no	yes	no	yes
YPR156C::chr16_5	YPR156C	TPO3	0.424447	0.083959	0.179182	0.3838	no	no	no	no
YJR075W::chr10_4	YJR075W	HOC1	0.424414	0.480089	0.1792	0.0957722	no	no	no	no
YOL015W::chr15_5	YOL015W	IRC10	0.424334	0.0383409	0.179244	0.428911	no	no	no	no
YJR130C::chr10_4	YJR130C	STR2	0.423412	-0.097185	0.179749	0.566147	no	no	no	no
YML007W::chr13_2	YML007W	YAP1	0.423078	-0.191745	0.179933	0.658287	no	no	no	no
YKR099W::chr00_4	YKR099W	BAS1	0.423009	1.11061	0.179971	0.00178151	no	no	no	no
YPL199C::chr16_1	YPL199C	YPL199C	0.422981	0.374757	0.179986	0.149792	no	no	no	no
YGR097W::chr7_4	YGR097W	ASK10	0.422222	0.5054	0.180403	0.0852512	no	no	no	no
YKR042W::chr11_3	YKR042W	UTH1	0.421987	-0.0938362	0.180532	0.562784	no	no	no	no
YDR539W::chr00_2	YDR539W	FDC1	0.421359	0.38321	0.180878	0.144825	no	no	no	no
YMR029C::chr13_2	YMR029C	FAR8	0.4212	0.749258	0.180966	0.0231494	no	no	no	no
YJL071W::chr10_2	YJL071W	ARG2	0.420635	-0.253534	0.181277	0.714103	no	no	no	no
YDR538W::chr00_2	YDR538W	PAD1	0.420538	0.188017	0.18133	0.287412	no	no	no	no
YGR212W::chr7_5	YGR212W	SLI1	0.41994	0.0459766	0.181661	0.421278	no	no	no	no
YFL050C::chr6_1	YFL050C	ALR2	0.419458	0.0133082	0.181927	0.454108	no	no	no	no
YJL064W::chr10_2	YJL064W	YJL064W	0.416592	0.371321	0.183516	0.151843	no	no	no	no
YMR160W::chr00_11	YMR160W	YMR160W	0.41593	-0.294919	0.183884	0.748884	no	no	no	no
YEL050C::chr5_2	YEL050C	RML2	0.415654	2.0516	0.184038	5.33706e-08	no	no	no	yes
YJL070C::chr00_15	YJL070C	YJL070C	0.415494	-0.170973	0.184127	0.638631	no	no	no	no
YDR107C::chr4_4	YDR107C	TMN2	0.415494	-0.152789	0.184127	0.621118	no	no	no	no
YJR128W::chr10_4	YJR128W	YJR128W	0.415008	0.119723	0.184398	0.349472	no	no	no	no
YGL034C::chr7_1	YGL034C	YGL034C	0.414962	-0.241447	0.184424	0.703529	no	no	no	no
YEL048C::chr5_2	YEL048C	TCA17	0.414673	0.434791	0.184585	0.116931	no	no	no	no
YER074W::chr5_3	YER074W	RPS24A	0.414078	1.04207	0.184916	0.00307556	no	no	no	no
YEL043W::chr5_2	YEL043W	YEL043W	0.41406	0.149751	0.184926	0.321558	no	no	no	no
YPR155C::chr16_5	YPR155C	NCA2	0.413391	0.249947	0.185301	0.236088	no	no	no	no
YPL257W::chr16_1	YPL257W	YPL257W	0.41278	-0.1788	0.185642	0.646084	no	no	no	no
YER020W::chr5_3	YER020W	GPA2	0.412369	1.09786	0.185873	0.00197628	no	no	no	no
YAL060W::chr1_1	YAL060W	BDH1	0.410537	0.235446	0.186901	0.247635	no	no	no	no
YPL137C::chr00_17b	YPL137C	GIP3	0.409764	0.0959368	0.187336	0.372185	no	no	no	no
YGR268C::chr00_3	YGR268C	HUA1	0.40718	0.548796	0.188794	0.0692643	no	no	no	no
YOL051W::chr15_5	YOL051W	GAL11	0.40718	1.11375	0.188794	0.0017364	no	no	no	no
YOL153C::chr00_15	YOL153C	YOL153C	0.40718	1.60159	0.188794	1.54372e-05	no	yes	no	yes
YMR144W::chr13_4	YMR144W	YMR144W	0.406846	0.0733498	0.188983	0.394176	no	no	no	no
YER024W::chr5_3	YER024W	YAT2	0.406272	0.290187	0.189308	0.205654	no	no	no	no
YCR032W::chr00_16a	YCR032W	BPH1	0.406155	0.287059	0.189375	0.207933	no	no	no	no
YNR006W::chr14_4	YNR006W	VPS27	0.405997	1.04324	0.189464	0.00304772	no	no	no	no
YGR146C::chr7_5	YGR146C	ECL1	0.405968	0.146099	0.18948	0.324903	no	no	no	no
YMR129W::chr00_9	YMR129W	POM152	0.404659	0.144323	0.190223	0.326535	no	no	no	no
YIL119C::chr9_2	YIL119C	RPI1	0.404606	-0.330562	0.190253	0.776942	no	no	no	no
YMR280C::chr13_5	YMR280C	CAT8	0.404534	-0.0090981	0.190294	0.476822	no	no	no	no
YOL056W::chr15_5	YOL056W	GPM3	0.404084	0.126449	0.19055	0.343141	no	no	no	no
YLL013C::chr12_1	YLL013C	PUF3	0.40396	-0.0801208	0.190621	0.548964	no	no	no	no
YNL323W::chr14_1	YNL323W	LEM3	0.403782	-0.37802	0.190722	0.811374	no	no	no	no
YHR087W::chr8_2	YHR087W	RTC3	0.403608	0.119616	0.190821	0.349572	no	no	no	no
YNL050C::chr14_4	YNL050C	YNL050C	0.403389	-0.167856	0.190946	0.635648	no	no	no	no
YGR213C::chr7_5	YGR213C	RTA1	0.402892	0.25261	0.191229	0.234	no	no	no	no
YPR096C::chr16_4	YPR096C	YPR096C	0.402324	0.211226	0.191553	0.267574	no	no	no	no
YAL066W::chr1_1	YAL066W	YAL066W	0.402042	0.641095	0.191714	0.0430132	no	no	no	no
YML058W::chr13_1b	YML058W	SML1	0.401669	0.270772	0.191927	0.220038	no	no	no	no
YJL149W::chr10_1	YJL149W	DAS1	0.401373	-0.321025	0.192097	0.769614	no	no	no	no
YGL060W::chr7_1	YGL060W	YBP2	0.400736	0.0326122	0.192461	0.434656	no	no	no	no
YGR101W::chr7_4	YGR101W	PCP1	0.400495	1.14263	0.192599	0.00136718	no	no	no	no
YDL131W::chr4_2	YDL131W	LYS21	0.400358	0.146824	0.192677	0.324237	no	no	no	no
YDL236W::chr4_3	YDL236W	PHO13	0.400348	0.198198	0.192683	0.278624	no	no	no	no
YDL113C::chr4_2	YDL113C	ATG20	0.400223	0.197289	0.192755	0.279403	no	no	no	no
YPL185W::chr16_2	YPL185W	YPL185W	0.399362	-0.446828	0.193248	0.855085	no	no	no	no
YNR019W::chr14_4	YNR019W	ARE2	0.398859	0.207091	0.193537	0.271057	no	no	no	no
YDR101C::chr4_4	YDR101C	ARX1	0.398839	1.10892	0.193549	0.0018064	no	no	no	no
YIL071C::chr9_1	YIL071C	PCI8	0.398815	0.0663328	0.193563	0.40108	no	no	no	no
YJR005W::chr00_13	YJR005W	APL1	0.398332	0.151257	0.19384	0.320182	no	no	no	no
YPL273W::chr16_1	YPL273W	SAM4	0.398134	0.0705346	0.193954	0.396942	no	no	no	no
YNL259C::chr14_1	YNL259C	ATX1	0.398091	0.0593915	0.193978	0.407941	no	no	no	no
YCL049C::chr3_1	YCL049C	YCL049C	0.397582	-0.0592394	0.194271	0.527814	no	no	no	no
YJL183W::chr10_1	YJL183W	MNN11	0.397572	1.09206	0.194277	0.00207106	no	no	no	no
YLR376C::chr12_5	YLR376C	PSY3	0.397572	0.191383	0.194277	0.284492	no	no	no	no
YOR018W::chr15_1	YOR018W	ROD1	0.397572	0.395426	0.194277	0.137845	no	no	no	no
YJL120W::chr10_2	YJL120W	YJL120W	0.397572	1.17661	0.194277	0.00102526	no	no	no	no
YPL197C::chr16_1	YPL197C	YPL197C	0.397572	-0.0543278	0.194277	0.522826	no	no	no	no
YDL022W::chr4_1	YDL022W	GPD1	0.396432	0.567451	0.194934	0.0631471	no	no	no	no
YDL109C::chr4_2	YDL109C	YDL109C	0.396301	0.157071	0.19501	0.314895	no	no	no	no
YMR164C::chr13_4	YMR164C	MSS11	0.395727	0.284403	0.195341	0.20988	no	no	no	no
YLL032C::chr12_1	YLL032C	YLL032C	0.395502	0.0837702	0.195471	0.383984	no	no	no	no
YLR370C::chr00_11	YLR370C	ARC18	0.39528	0.39528	0.1956	0.137927	yes	yes	yes	yes
YML067C::chr00_12	YML067C	ERV41	0.395075	0.281752	0.195718	0.211833	no	no	no	no
YNR025C::chr14_4	YNR025C	YNR025C	0.39499	0.376752	0.195767	0.14861	no	no	no	no
YML050W::chr13_1b	YML050W	AIM32	0.394481	0.181635	0.196062	0.292986	no	no	no	no
YJL142C::chr10_1	YJL142C	IRC9	0.394281	0.105156	0.196178	0.363323	no	no	no	no
YJL060W::chr10_2	YJL060W	BNA3	0.393891	0.167575	0.196403	0.305441	no	no	no	no
YHL020C::chr8_1	YHL020C	OPI1	0.393578	0.512906	0.196585	0.0823043	no	no	no	no
YKR051W::chr11_3	YKR051W	YKR051W	0.393272	0.0172429	0.196763	0.450133	no	no	no	no
YBR105C::chr2_3	YBR105C	VID24	0.39314	0.00720555	0.196839	0.460283	no	no	no	no
YLR255C::chr12_4	YLR255C	YLR255C	0.39243	-0.00336714	0.197251	0.471002	no	no	no	no
YJL182C::chr10_1	YJL182C	YJL182C	0.392287	0.0676454	0.197334	0.399786	no	no	no	no
YGR058W::chr7_4	YGR058W	PEF1	0.392265	0.381816	0.197347	0.145636	no	no	no	no
YDR482C::chr4_8	YDR482C	CWC21	0.391868	-0.201345	0.197578	0.667231	no	no	no	no
YHR097C::chr8_2	YHR097C	YHR097C	0.391778	0.0693373	0.197631	0.39812	no	no	no	no
YGR041W::chr7_4	YGR041W	BUD9	0.391643	-0.156602	0.197709	0.624812	no	no	no	no
YER027C::chr00_11	YER027C	GAL83	0.391555	-0.211212	0.19776	0.676326	no	no	no	no
YCR016W::chr3_1	YCR016W	YCR016W	0.390862	0.397546	0.198163	0.136657	no	no	no	no
YNL044W::chr14_4	YNL044W	YIP3	0.390681	0.0347479	0.198269	0.432513	no	no	no	no
YIR001C::chr9_2	YIR001C	SGN1	0.390584	0.0622159	0.198326	0.405146	no	no	no	no
YDR525W-A::chr00_2	YDR525W-A	SNA2	0.389648	0.396496	0.198872	0.137245	no	no	no	no
YKR052C::chr11_3	YKR052C	MRS4	0.389382	0.218739	0.199027	0.261304	no	no	no	no
YMR300C::chr13_5	YMR300C	ADE4	0.388611	0.786702	0.199478	0.0183909	no	no	no	no
YLR375W::chr12_5	YLR375W	STP3	0.388594	0.0431674	0.199488	0.424083	no	no	no	no
YGR259C::chr00_3	YGR259C	YGR259C	0.387549	-0.408184	0.2001	0.831451	no	no	no	no
YGR018C::chr7_3/chr00_12	YGR018C	YGR018C	0.387318	-0.00359916	0.200235	0.471238	no	no	no	no
YHR114W::chr8_2	YHR114W	BZZ1	0.387123	0.34257	0.20035	0.169733	no	no	no	no
YDR128W::chr4_4	YDR128W	MTC5	0.386429	0.738104	0.200757	0.024753	no	no	no	no
YGL028C::chr7_1	YGL028C	SCW11	0.386308	0.11627	0.200828	0.352738	no	no	no	no
YOR286W::chr15_3	YOR286W	RDL2	0.385836	0.00593959	0.201105	0.461565	no	no	no	no
YGL035C::chr7_1	YGL035C	MIG1	0.385306	-0.363689	0.201417	0.801338	no	no	no	no
YJR121W::chr00_12	YJR121W	ATP2	0.38497	0.77145	0.201615	0.0202178	no	no	no	no
YGR205W::chr7_5	YGR205W	TDA10	0.384792	0.219529	0.20172	0.260648	no	no	no	no
YKL168C::chr11_2	YKL168C	KKQ8	0.384764	0.0941582	0.201736	0.373903	no	no	no	no
YDR148C::chr4_5	YDR148C	KGD2	0.38446	0.778856	0.201915	0.0193124	no	no	no	no
YNL190W::chr14_2	YNL190W	YNL190W	0.38446	0.351681	0.201915	0.163923	no	no	no	no
YIR018W::chr00_3	YIR018W	YAP5	0.38446	0.630514	0.201915	0.045538	no	no	no	no
YFR009W::chr6_1	YFR009W	GCN20	0.383845	0.910728	0.202278	0.00809595	no	no	no	no
YIR002C::chr9_2	YIR002C	MPH1	0.383427	-0.0555188	0.202524	0.524036	no	no	no	no
YIL102C::chr9_2	YIL102C	YIL102C	0.382951	-0.748271	0.202805	0.966185	yes	no	yes	no
YMR195W::chr13_4	YMR195W	ICY1	0.382249	-0.174302	0.20322	0.641808	no	no	no	no
YGR189C::chr7_5	YGR189C	CRH1	0.380989	0.0575309	0.203967	0.409785	no	no	no	no
YOL150C::chr00_10	YOL150C	YOL150C	0.380919	0.30918	0.204008	0.192139	no	no	no	no
YJR066W::chr00_13	YJR066W	TOR1	0.380527	-0.0293436	0.20424	0.497412	no	no	no	no
YAL054C::chr00_12	YAL054C	ACS1	0.380271	0.42939	0.204393	0.119659	no	no	no	no
YOR088W::chr15_1	YOR087W	YVC1	0.379731	0.323774	0.204713	0.182132	no	no	no	no
YOR107W::chr15_2	YOR107W	RGS2	0.378889	0.0794064	0.205214	0.388243	no	no	no	no
YKR069W::chr00_3	YKR069W	MET1	0.378375	0.165035	0.20552	0.307715	no	no	no	no
YCR019W::chr3_1	YCR019W	MAK32	0.37823	0.233824	0.205606	0.248945	no	no	no	no
YGR149W::chr7_5	YGR149W	YGR149W	0.37804	0.535566	0.205719	0.0738724	no	no	no	no
YGR215W::chr7_5	YGR215W	RSM27	0.377349	0.522751	0.206131	0.0785559	no	no	no	no
YNL012W::chr14_4	YNL012W	SPO1	0.376224	-0.0859367	0.206803	0.554832	no	no	no	no
YGR070W::chr7_4	YGR070W	ROM1	0.375652	0.659285	0.207145	0.0389382	no	no	no	no
YMR177W::chr13_4	YMR177W	MMT1	0.375327	0.243317	0.20734	0.24133	no	no	no	no
YJL186W::chr10_1	YJL186W	MNN5	0.374807	-0.123027	0.207651	0.591923	no	no	no	no
YDR534C::chr4_8	YDR534C	FIT1	0.374671	0.248136	0.207733	0.237514	no	no	no	no
YBR092C::chr2_3	YBR092C	PHO3	0.374663	-0.0572111	0.207737	0.525755	no	no	no	no
YFR032C::chr00_2	YFR032C	RRT5	0.374584	0.231684	0.207785	0.250679	no	no	no	no
YPL102C::chr16_2	YPL102C	YPL102C	0.374161	1.74025	0.208039	3.08266e-06	no	no	no	yes
YEL049W::chr5_2	YEL049W	PAU2	0.374045	0.588329	0.208108	0.056809	no	no	no	no
YML018C::chr13_2	YML018C	YML018C	0.373699	0.184615	0.208316	0.290377	no	no	no	no
YLR019W::chr12_1	YLR019W	PSR2	0.373345	0.261775	0.208528	0.226894	no	no	no	no
YOR190W::chr15_2	YOR190W	SPR1	0.37291	-0.0328481	0.20879	0.500979	no	no	no	no
YKL086W::chr11_1	YKL086W	SRX1	0.372481	0.0705025	0.209048	0.396973	no	no	no	no
YLR231C::chr12_4	YLR231C	BNA5	0.372399	0.222052	0.209097	0.258562	no	no	no	no
YOL121C::chr00_6	YOL121C	RPS19A	0.372014	0.632012	0.209329	0.0451734	no	no	no	no
YOR214C::chr15_3	YOR214C	YOR214C	0.372003	0.365681	0.209335	0.15525	no	no	no	no
YOL075C::chr15_5	YOL075C	YOL075C	0.371777	0.281897	0.209471	0.211726	no	no	no	no
YDR216W::chr4_5	YDR216W	ADR1	0.371697	0.339702	0.20952	0.171589	no	no	no	no
YOL060C::chr15_5	YOL060C	MAM3	0.370955	-0.530069	0.209967	0.898107	no	no	no	no
YLR300W::chr12_4	YLR300W	EXG1	0.370437	0.378586	0.210279	0.147528	no	no	no	no
YOR070C::chr15_1	YOR070C	GYP1	0.37035	0.323202	0.210332	0.182517	no	no	no	no
YER129W::chr00_5	YER129W	SAK1	0.369838	-0.024206	0.210641	0.492184	no	no	no	no
YGL056C::chr7_1	YGL056C	SDS23	0.369688	0.298371	0.210732	0.199762	no	no	no	no
YIL006W::chr9_1	YIL006W	YIA6	0.369651	0.197718	0.210754	0.279035	no	no	no	no
YGR086C::chr00_14	YGR086C	PIL1	0.368785	0.20732	0.211278	0.270864	no	no	no	no
YDL175C::chr4_2	YDL175C	AIR2	0.368572	0.313872	0.211407	0.188885	no	no	no	no
YOR384W::chr15_5	YOR384W	FRE5	0.367971	0.12388	0.211771	0.345554	no	no	no	no
YDL086W::chr4_1	YDL086W	YDL086W	0.36772	0.0497727	0.211923	0.417494	no	no	no	no
YPR030W::chr16_4	YPR030W	CSR2	0.367261	0.210077	0.212201	0.268539	no	no	no	no
YOR186W::chr15_2	YOR186W	YOR186W	0.366338	-0.201169	0.212762	0.667068	no	no	no	no
YLR252W::chr12_4	YLR252W	YLR252W	0.365844	0.408946	0.213063	0.130392	no	yes	no	yes
YGL017W::chr7_1	YGL017W	ATE1	0.365515	-0.34557	0.213263	0.7882	no	no	no	no
YGR241C::chr00_2	YGR241C	YAP1802	0.365213	0.599248	0.213446	0.0536998	no	no	no	no
YPL112C::chr16_2	YPL112C	PEX25	0.365173	0.466662	0.213471	0.101727	no	no	no	no
YFR047C::chr00_2	YFR047C	BNA6	0.364757	0.329639	0.213724	0.178204	no	no	no	no
YBR301W::chr00_16a	YBR301W	PAU24	0.364407	-0.0559492	0.213937	0.524473	no	no	no	no
YHR035W::chr8_1	YHR035W	YHR035W	0.364161	0.382164	0.214088	0.145433	no	no	no	no
YCR106W::chr00_2	YCR106W	RDS1	0.36409	0.187718	0.214131	0.287672	no	no	no	no
YCL010C::chr3_1	YCL010C	SGF29	0.362903	0.376009	0.214856	0.149049	no	no	no	no
YLR263W::chr12_4	YLR263W	RED1	0.36283	0.589518	0.214901	0.0564636	no	no	no	no
YDR222W::chr4_5	YDR222W	YDR222W	0.362334	0.0642142	0.215204	0.403171	no	no	no	no
YDR438W::chr4_8	YDR438W	THI74	0.362217	0.347071	0.215276	0.166846	no	no	no	no
YMR201C::chr13_4	YMR201C	RAD14	0.362216	0.1359	0.215276	0.33432	no	no	no	no
YKL215C::chr00_14	YKL215C	OXP1	0.361391	0.191072	0.215781	0.284761	no	no	no	no
YDR130C::chr4_4	YDR130C	FIN1	0.361083	0.183989	0.21597	0.290924	no	no	no	no
YNL305C::chr14_1	YNL305C	BXI1	0.359456	0.482415	0.216969	0.0947673	no	no	no	no
YNR032W::chr14_4	YNR032W	PPG1	0.357976	0.51292	0.21788	0.0822988	no	no	no	no
YPR022C::chr00_15	YPR022C	YPR022C	0.357964	0.19294	0.217887	0.283146	no	no	no	no
YJR095W::chr00_12	YJR095W	SFC1	0.357814	0.0648268	0.217979	0.402566	no	no	no	no
YER058W::chr5_3	YER058W	PET117	0.356479	0.356479	0.218804	0.160916	yes	yes	yes	yes
YGL163C::chr7_2	YGL163C	RAD54	0.35607	1.18089	0.219056	0.000988263	no	no	no	yes
YER047C::chr5_3	YER047C	SAP1	0.355907	0.481481	0.219157	0.0951699	no	no	no	no
YJR134C::chr00_12	YJR134C	SGM1	0.355564	0.220427	0.219369	0.259905	no	no	no	no
YGR258C::chr00_17a	YGR258C	RAD2	0.355466	0.229934	0.21943	0.252102	no	no	no	no
YML054C::chr13_1b	YML054C	CYB2	0.355441	0.332449	0.219445	0.176341	no	no	no	no
YER038W-A::chr5_3	YER038W-A	YER038W-A	0.355276	0.0161095	0.219547	0.451277	no	no	no	no
YPR084W::chr16_4	YPR084W	YPR084W	0.355241	0.096101	0.219569	0.372027	no	no	no	no
YIL028W::chr9_1	YIL028W	YIL028W	0.355091	-0.542709	0.219662	0.903727	yes	no	yes	no
YMR159C::chr13_4	YMR159C	ATG16	0.354261	0.00973193	0.220176	0.457725	no	no	no	no
YGL157W::chr7_2	YGL157W	ARI1	0.354209	-0.247496	0.220208	0.708843	no	no	no	no
YIL010W::chr9_1	YIL010W	DOT5	0.354093	-0.219615	0.22028	0.68399	no	no	no	no
YPL244C::chr16_1	YPL244C	HUT1	0.353647	-0.231226	0.220557	0.694451	no	no	no	no
YOR318C::chr15_4	YOR318C	YOR318C	0.353623	0.0531248	0.220572	0.414159	no	no	no	no
YOR155C::chr15_2	YOR155C	ISN1	0.352958	0.255924	0.220985	0.231416	no	no	no	no
YHR082C::chr8_2	YHR082C	KSP1	0.352751	0.617575	0.221113	0.0487858	no	no	no	no
YCL023C::chr3_1/chr00_12	YCL023C	YCL023C	0.352718	0.0346542	0.221134	0.432607	no	no	no	no
YBR294W::chr00_16a	YBR294W	SUL1	0.352393	0.250575	0.221336	0.235595	no	no	no	no
YOL003C::chr15_5	YOL003C	PFA4	0.351768	0.0552424	0.221725	0.412055	no	no	no	no
YDL156W::chr4_2	YDL156W	CMR1	0.351356	-0.357267	0.221981	0.796739	no	no	no	no
YHR106W::chr8_2	YHR106W	TRR2	0.35078	-0.137612	0.22234	0.606305	no	no	no	no
YOL047C::chr15_5	YOL047C	YOL047C	0.350617	-0.0743665	0.222442	0.543147	no	no	no	no
YKL015W::chr11_1	YKL015W	PUT3	0.350559	0.130167	0.222478	0.33966	no	no	no	no
YOR279C::chr15_3	YOR279C	RFM1	0.350462	0.235429	0.222538	0.247648	no	no	no	no
YJL094C::chr00_15	YJL094C	KHA1	0.350077	0.380535	0.222779	0.146384	no	no	no	no
YGR227W::chr00_2	YGR227W	DIE2	0.349658	0.169429	0.22304	0.303785	no	no	no	no
YDL134C-A::chr4_2	YDL133C-A	RPL41B	0.349596	0.0145749	0.223079	0.452828	no	no	no	no
YAR015W::chr1_1	YAR015W	ADE1	0.348814	0.82076	0.223568	0.0148129	no	yes	no	yes
YER185W::chr00_5	YER185W	PUG1	0.348607	-0.193456	0.223697	0.659887	no	no	no	no
YDR181C::chr4_5	YDR181C	SAS4	0.348027	0.213079	0.22406	0.26602	no	no	no	no
YDR029W::chr4_3	YDR029W	YDR029W	0.347977	0.188046	0.224091	0.287386	no	no	no	no
YDR469W::chr4_8	YDR469W	SDC1	0.347778	-0.135108	0.224216	0.603845	no	no	no	no
YPL240C::chr16_1	YPL240C	HSP82	0.347736	-0.180226	0.224243	0.647436	no	no	no	no
YOR156C::chr15_2	YOR156C	NFI1	0.347667	0.251763	0.224286	0.234663	no	no	no	no
YJR080C::chr00_12	YJR080C	AIM24	0.347505	-0.285734	0.224387	0.741363	no	no	no	no
YNL307C::chr14_1	YNL307C	MCK1	0.347485	0.715464	0.224399	0.0282957	no	no	no	no
YGL165C::chr7_2	YGL165C	YGL165C	0.347367	0.257172	0.224474	0.230447	no	no	no	no
YOL042W::chr15_5	YOL042W	NGL1	0.346648	0.11164	0.224925	0.357134	no	no	no	no
YNL191W::chr14_2	YNL191W	DUG3	0.346471	0.055614	0.225036	0.411686	no	no	no	no
YCR077C::chr00_1	YCR077C	PAT1	0.345577	0.655669	0.225597	0.0397221	no	yes	no	yes
YER049W::chr5_3	YER049W	TPA1	0.345455	0.119138	0.225674	0.350024	no	no	no	no
YPR069C::chr16_4	YPR069C	SPE3	0.345303	0.282502	0.22577	0.21128	no	no	no	no
YJL017W::chr00_13	YJL016W	YJL016W	0.345229	0.089568	0.225816	0.378347	no	no	no	no
YGL179C::chr7_2	YGL179C	TOS3	0.344859	0.115941	0.226049	0.35305	no	no	no	no
YDR215C::chr4_5	YDR215C	YDR215C	0.343818	0.157394	0.226705	0.314603	no	no	no	no
YPL123C::chr16_2	YPL123C	RNY1	0.343591	0.0140444	0.226848	0.453364	no	no	no	no
YJR063W::chr00_13	YJR063W	RPA12	0.343142	1.2015	0.227131	0.000826702	no	yes	no	yes
YNR039C::chr14_4	YNR039C	ZRG17	0.342452	0.254404	0.227567	0.2326	no	no	no	no
YJR020W::chr00_13	YJR020W	YJR020W	0.34158	0.507793	0.228118	0.0843031	no	no	no	no
YOR135C::chr15_2	YOR135C	IRC14	0.341391	-0.107318	0.228238	0.576294	no	no	no	no
YNL333W::chr14_1	YNL333W	SNZ2	0.341203	0.0568055	0.228357	0.410504	no	no	no	no
YLR307W::chr12_4	YLR307W	CDA1	0.341156	0.0855237	0.228386	0.382277	no	no	no	no
YNL326C::chr14_1	YNL326C	PFA3	0.341137	0.320919	0.228398	0.184063	no	no	no	no
YBR158W::chr2_3	YBR158W	AMN1	0.340951	0.30615	0.228516	0.194258	no	no	no	no
YDR077W::chr4_4	YDR077W	SED1	0.340922	-0.132878	0.228534	0.601651	no	no	no	no
YER052C::chr5_3	YER052C	HOM3	0.340541	-0.130119	0.228776	0.598933	no	no	no	no
YCL038C::chr00_12	YCL038C	ATG22	0.33998	0.464886	0.229131	0.102534	no	no	no	no
YML055W::chr13_1b	YML055W	SPC2	0.338192	0.2821	0.230267	0.211576	no	no	no	no
YPL267W::chr16_1	YPL267W	ACM1	0.337287	0.306932	0.230842	0.193709	no	no	no	no
YNR062C::chr00_4	YNR062C	YNR062C	0.337234	0.0271783	0.230876	0.440118	no	no	no	no
YKL185W::chr11_2	YKL185W	ASH1	0.336931	-0.249541	0.231069	0.71063	no	no	no	no
YMR019W::chr13_2	YMR019W	STB4	0.336763	0.272794	0.231176	0.218513	no	no	no	no
YER122C::chr00_5	YER122C	GLO3	0.336608	0.806899	0.231275	0.0161895	no	no	no	no
YPL261C::chr16_1	YPL261C	YPL261C	0.335891	0.258652	0.231733	0.229301	no	no	no	no
YLR401C::chr12_5	YLR401C	DUS3	0.335621	0.0543966	0.231904	0.412895	no	no	no	no
YML051W::chr13_1b	YML051W	GAL80	0.334983	0.133541	0.232312	0.336514	no	no	no	no
YGR056W::chr7_4	YGR056W	RSC1	0.334836	0.633943	0.232406	0.044707	no	no	no	no
YML011C::chr13_2	YML011C	RAD33	0.334299	0.336297	0.23275	0.173809	no	no	no	no
YBR290W::chr00_1	YBR290W	BSD2	0.334294	0.344854	0.232753	0.168265	no	no	no	no
YNL041C::chr14_4	YNL041C	COG6	0.33403	0.731746	0.232922	0.0257083	no	no	no	no
YCR073C::chr00_16a	YCR073C	SSK22	0.333979	0.193012	0.232954	0.283084	no	no	no	no
YNL032W::chr14_4	YNL032W	SIW14	0.333276	0.796172	0.233405	0.0173289	no	no	no	no
YGR192C::chr7_5	YGR192C	TDH3	0.333209	0.482493	0.233447	0.0947338	no	no	no	no
YIL098C::chr9_2	YIL098C	FMC1	0.332929	-0.81872	0.233627	0.977634	no	no	no	no
YFL014W::chr00_15	YFL014W	HSP12	0.332024	0.40328	0.234207	0.13348	no	no	no	no
YDL194W::chr00_16b	YDL194W	SNF3	0.33202	0.404736	0.23421	0.132682	no	no	no	no
YGL004C::chr7_1	YGL004C	RPN14	0.331833	-0.0565081	0.23433	0.525041	no	no	no	no
YLR247C::chr12_4	YLR247C	IRC20	0.331556	0.302372	0.234508	0.196919	no	no	no	no
YAR040C::chr1_1	not found	YAR040C	0.331235	-0.0149085	0.234714	0.482727	no	no	no	no
YER002W::chr5_2	YER002W	NOP16	0.331078	0.529698	0.234815	0.0759899	no	no	no	no
YIL073C::chr9_1	YIL073C	SPO22	0.33089	0.0252968	0.234936	0.442011	no	no	no	no
YEL068C::chr5_2	YEL068C	YEL068C	0.330141	0.160639	0.235418	0.31167	no	no	no	no
YOR300W::chr15_4/chr00_12	YOR300W	YOR300W	0.33009	0.292564	0.235451	0.203933	no	no	no	no
YKL053W::chr11_1	YKL053W	YKL053W	0.329499	-0.18667	0.235831	0.653521	no	no	no	no
YER007W::chr5_2	YER007W	PAC2	0.329426	0.208462	0.235879	0.2699	no	no	no	no
YOL110W::chr00_6	YOL110W	SHR5	0.327183	-0.195934	0.237327	0.662201	no	no	no	no
YGR202C::chr7_5	YGR202C	PCT1	0.326448	0.54901	0.237802	0.0691916	no	no	no	no
YGL138C::chr7_2	YGL138C	YGL138C	0.326328	0.0813153	0.23788	0.386378	no	no	no	no
YCR015C::chr3_1	YCR015C	YCR015C	0.326121	0.0650107	0.238013	0.402385	no	no	no	no
YHL009C::chr8_1	YHL009C	YAP3	0.326043	-0.291064	0.238064	0.745741	no	no	no	no
YGL141W::chr7_2	YGL141W	HUL5	0.325655	0.233431	0.238316	0.249263	no	no	no	no
YFR038W::chr00_2	YFR038W	IRC5	0.325547	0.248509	0.238386	0.23722	no	no	no	no
YDR095C::chr4_4	YDR095C	YDR095C	0.324953	0.0921132	0.238771	0.375881	no	no	no	no
YER040W::chr5_3	YER040W	GLN3	0.324921	0.852113	0.238792	0.0120655	no	no	no	no
YML041C::chr00_11	YML041C	VPS71	0.324517	0.548713	0.239054	0.0692927	no	no	no	no
YBL017C::chr2_1	YBL017C	PEP1	0.32422	-0.180632	0.239247	0.64782	no	no	no	no
YJL084C::chr10_2	YJL084C	ALY2	0.324122	0.180137	0.23931	0.294302	no	no	no	no
YDR147W::chr4_5	YDR147W	EKI1	0.323797	-0.0463217	0.239522	0.514687	no	no	no	no
YGL146C::chr7_2	YGL146C	RRT6	0.323417	0.00915318	0.239768	0.458311	no	no	no	no
YKL073W::chr11_1	YKL073W	LHS1	0.323319	0.261699	0.239832	0.226952	no	no	no	no
YIL168W::chr9_2	YIL168W	YIL168W	0.323117	-0.09014	0.239963	0.559066	no	no	no	no
YIL017C::chr9_1	YIL017C	VID28	0.322872	-0.116692	0.240123	0.585636	no	no	no	no
YPR097W::chr16_4	YPR097W	YPR097W	0.322284	0.19521	0.240506	0.281189	no	no	no	no
YKR001C::chr11_3	YKR001C	VPS1	0.322113	0.322113	0.240617	0.183253	yes	yes	yes	yes
YOR343C::chr15_4	YOR343C	YOR343C	0.321893	0.359684	0.240761	0.158928	no	no	no	no
YGR249W::chr00_2	YGR249W	MGA1	0.32171	0.297081	0.24088	0.200685	no	no	no	no
YMR294W::chr13_5	YMR294W	JNM1	0.321623	0.669458	0.240937	0.0367998	no	no	no	no
YCL063W::chr3_1	YCL063W	VAC17	0.32147	0.444738	0.241036	0.112022	no	no	no	no
YOL091W::chr00_6	YOL091W	SPO21	0.320875	-0.155321	0.241425	0.623572	no	no	no	no
YOR144C::chr15_2	YOR144C	ELG1	0.320329	0.113749	0.241781	0.355129	no	no	no	no
YDL210W::chr4_3	YDL210W	UGA4	0.31963	0.261724	0.242238	0.226933	no	no	no	no
YPL226W::chr16_1	YPL226W	NEW1	0.319151	0.823719	0.242551	0.0145324	no	no	no	no
YDL048C::chr4_1	YDL048C	STP4	0.318986	0.381832	0.242659	0.145627	no	no	no	no
YDR142C::chr4_4	YDR142C	PEX7	0.3188	0.133824	0.242781	0.33625	no	no	no	no
YLR098C::chr12_2	YLR098C	CHA4	0.318307	0.0799179	0.243104	0.387743	no	no	no	no
YIL018W::chr9_1	YIL018W	RPL2B	0.318283	-0.124052	0.24312	0.592938	no	no	no	no
YPR066W::chr16_4	YPR066W	UBA3	0.318277	0.858252	0.243124	0.0115826	no	no	no	no
YKL217W::chr11_3	YKL217W	JEN1	0.318145	0.0718182	0.24321	0.39568	no	no	no	no
YKR070W::chr00_3	YKR070W	YKR070W	0.318079	-0.0277605	0.243253	0.495801	no	no	no	no
YIL090W::chr9_1	YIL090W	ICE2	0.318064	0.211576	0.243263	0.26728	no	no	no	no
YPL221W::chr16_1	YPL221W	FLC1	0.317709	0.118835	0.243496	0.35031	no	no	no	no
YBR223C::chr2_4	YBR223C	TDP1	0.316976	0.0137947	0.243977	0.453616	no	no	no	no
YER053C::chr5_3	YER053C	PIC2	0.316073	0.388196	0.24457	0.141948	no	no	no	no
YIL011W::chr9_1	YIL011W	TIR3	0.31542	-0.0172974	0.244999	0.485156	no	no	no	no
YKL171W::chr11_2	YKL171W	NNK1	0.314256	0.218336	0.245766	0.261638	no	no	no	no
YMR052C-A::chr00_5	YMR052C-A	YMR052C-A	0.31412	0.124433	0.245855	0.345034	no	no	no	no
YBR293W::chr00_1	YBR293W	VBA2	0.314	0.285953	0.245934	0.208742	no	no	no	no
YCR030C::chr00_16a	YCR030C	SYP1	0.313583	0.325997	0.24621	0.180636	no	no	no	no
YLR035C::chr00_8	YLR035C	MLH2	0.313376	0.143643	0.246346	0.32716	no	no	no	no
YNL319W::chr14_1	YNL319W	YNL319W	0.313161	0.173762	0.246488	0.299931	no	no	no	no
YOR038C::chr15_1	YOR038C	HIR2	0.313149	0.424191	0.246496	0.122328	no	no	no	no
YCL061C::chr3_1	YCL061C	MRC1	0.313115	0.202654	0.246518	0.27482	no	no	no	no
YKL097C::chr11_2	YKL097C	YKL097C	0.312541	0.809181	0.246897	0.0159557	no	no	no	no
YGL015C::chr7_1	YGL015C	YGL015C	0.312434	0.32465	0.246968	0.181541	no	no	no	no
YLL040C::chr12_1	YLL040C	VPS13	0.312258	-0.068474	0.247084	0.53718	no	no	no	no
YPR174C::chr16_5	YPR174C	YPR174C	0.312065	0.434997	0.247212	0.116827	no	no	no	no
YOR352W::chr15_4	YOR352W	YOR352W	0.311945	0.09032	0.247291	0.377618	no	no	no	no
YDR149C::chr4_5	YDR149C	YDR149C	0.311878	-0.055615	0.247336	0.524133	no	no	no	no
YNR009W::chr14_4	YNR009W	NRM1	0.311588	0.315431	0.247528	0.187812	no	no	no	no
YGL032C::chr7_1	YGL032C	AGA2	0.310881	0.330389	0.247995	0.177705	no	no	no	no
YOR005C::chr15_1	YOR005C	DNL4	0.310718	0.346171	0.248103	0.167421	no	no	no	no
YOR062C::chr15_1	YOR062C	YOR062C	0.310716	0.0568358	0.248105	0.410474	no	no	no	no
YJR098C::chr00_12	YJR098C	YJR098C	0.310644	-0.116849	0.248152	0.585792	no	no	no	no
YAL051W::chr1_1	YAL051W	OAF1	0.310603	0.122605	0.248179	0.346753	no	no	no	no
YDR465C::chr4_8	YDR465C	RMT2	0.3105	-0.00565868	0.248248	0.473328	no	no	no	no
YKL090W::chr11_1	YKL090W	CUE2	0.310459	0.424067	0.248275	0.122392	no	no	no	no
YLR254C::chr12_4	YLR254C	NDL1	0.30926	0.217037	0.24907	0.262717	no	no	no	no
YKR014C::chr11_3	YKR014C	YPT52	0.308969	0.0546919	0.249263	0.412602	no	no	no	no
YPR170C::chr16_5	YPR170C	YPR170C	0.308076	0.117919	0.249856	0.351176	no	no	no	no
YLR032W::chr00_8	YLR032W	RAD5	0.307971	0.397112	0.249926	0.1369	no	no	no	no
YOL095C::chr00_6	YOL095C	HMI1	0.307574	0.477291	0.25019	0.0969917	no	no	no	no
YOR322C::chr15_4	YOR322C	LDB19	0.307427	0.264975	0.250288	0.224442	no	no	no	no
YOR161C::chr15_2	YOR161C	PNS1	0.307427	0.251036	0.250288	0.235233	no	no	no	no
YLR011W::chr12_1	YLR011W	LOT6	0.30684	-0.181298	0.250679	0.64845	no	no	no	no
YOL089C::chr00_6	YOL089C	HAL9	0.306698	0.0720187	0.250774	0.395483	no	no	no	no
YER144C::chr00_2	YER144C	UBP5	0.306284	0.172993	0.251049	0.300614	no	no	no	no
YKR043C::chr11_3	YKR043C	SHB17	0.306234	0.372099	0.251083	0.151377	no	no	no	no
YOR192C::chr15_2	YOR192C	THI72	0.306179	0.166605	0.251119	0.306309	no	no	no	no
YDR067C::chr4_4	YDR067C	OCA6	0.30596	0.232661	0.251266	0.249887	no	no	no	no
YOR346W::chr15_4	YOR346W	REV1	0.305954	-0.0245981	0.251269	0.492583	no	no	no	no
YPR044C::chr16_4	YPR044C	OPI11	0.305587	1.44471	0.251514	8.27025e-05	no	no	no	yes
YLR407W::chr12_5	YLR407W	YLR407W	0.305099	0.344164	0.25184	0.168707	no	no	no	no
YAL058W::chr1_1	YAL058W	CNE1	0.304615	0.176261	0.252163	0.297718	no	no	no	no
YLR284C::chr12_4	YLR284C	ECI1	0.304117	0.0199569	0.252496	0.447393	no	no	no	no
YLR318W::chr12_4	YLR318W	EST2	0.304099	0.128827	0.252508	0.340913	no	no	no	no
YKL017C::chr11_1	YKL017C	HCS1	0.303712	0.281246	0.252767	0.212207	no	no	no	no
YGR270W::chr00_3	YGR270W	YTA7	0.303552	0.320763	0.252874	0.184169	no	no	no	no
YFL031W::chr6_1	YFL031W	HAC1	0.303421	-0.222053	0.252962	0.686199	no	no	no	no
YGL117W::chr7_2	YGL117W	YGL117W	0.303303	0.254276	0.25304	0.2327	no	no	no	no
YBL066C::chr2_1	YBL066C	SEF1	0.302872	-0.0514521	0.253329	0.519903	no	no	no	no
YOR386W::chr15_5	YOR386W	PHR1	0.30265	0.0987013	0.253478	0.369521	no	no	no	no
YNL294C::chr14_1	YNL294C	RIM21	0.302599	-0.0787868	0.253512	0.547616	no	no	no	no
YPR070W::chr16_4	YPR070W	MED1	0.302073	0.412249	0.253864	0.128614	no	no	no	no
YMR116C::chr00_9	YMR116C	ASC1	0.302031	0.302031	0.253893	0.197161	yes	yes	yes	yes
YKL093W::chr11_1	YKL093W	MBR1	0.301489	0.0751726	0.254256	0.392387	no	no	no	no
YLR327C::chr12_5	YLR327C	TMA10	0.301457	-0.00113664	0.254278	0.468739	no	no	no	no
YGL139W::chr7_2	YGL139W	FLC3	0.301406	0.261998	0.254312	0.226723	no	no	no	no
YOL052C::chr15_5	YOL052C	SPE2	0.300704	0.165092	0.254783	0.307664	no	no	no	no
YOR164C::chr15_2	YOR164C	GET4	0.300638	0.273873	0.254828	0.217702	no	no	no	no
YMR124W::chr00_9	YMR124W	YMR124W	0.300481	0.227209	0.254933	0.254326	no	no	no	no
YDR207C::chr4_5	YDR207C	UME6	0.300067	1.53318	0.255211	3.27023e-05	no	no	no	yes
YLR290C::chr12_4	YLR290C	YLR290C	0.2999	0.0735839	0.255323	0.393946	no	no	no	no
YPR029C::chr16_4	YPR029C	APL4	0.299146	0.270289	0.255831	0.220403	no	no	no	no
YLL019C::chr12_1	YLL019C	KNS1	0.298397	0.370954	0.256336	0.152063	no	no	no	no
YNR057C::chr00_4	YNR057C	BIO4	0.298374	-0.0906721	0.256351	0.559602	no	no	no	no
YHL042W::chr8_1	YHL042W	YHL042W	0.298261	-0.108383	0.256427	0.577358	no	no	no	no
YDR078C::chr4_4	YDR078C	SHU2	0.297403	0.0808673	0.257006	0.386815	no	no	no	no
YER091C::chr00_8	YER091C	MET6	0.297403	0.110615	0.257006	0.358111	no	no	no	no
YKL068W::chr11_1	YKL068W	NUP100	0.297112	-0.00982311	0.257202	0.477558	no	no	no	no
YOR115C::chr15_2	YOR115C	TRS33	0.295805	-0.0895014	0.258085	0.558423	no	no	no	no
YGR034W::chr7_4	YGR034W	RPL26B	0.295737	0.536214	0.258131	0.0736414	no	no	no	no
YBR116C::chr2_3	YBR116C	YBR116C	0.295455	-0.26017	0.258322	0.719831	no	no	no	no
YDR143C::chr4_4	YDR143C	SAN1	0.295323	-0.533401	0.258411	0.899611	no	no	no	no
YLR052W::chr00_8	YLR052W	IES3	0.295292	0.686803	0.258432	0.033376	no	no	no	no
YPL186C::chr16_2	YPL186C	UIP4	0.295062	0.188586	0.258588	0.286917	no	no	no	no
YPL220W::chr16_1	YPL220W	RPL1A	0.295062	0.300753	0.258588	0.198067	no	no	no	no
YPL145C::chr16_2	YPL145C	KES1	0.294478	-0.242108	0.258983	0.704113	no	no	no	no
YBR276C::chr00_16a	YBR276C	PPS1	0.293818	0.0800204	0.259431	0.387643	no	no	no	no
YMR287C::chr13_5	YMR287C	DSS1	0.293502	0.148856	0.259645	0.322376	no	no	no	no
YDR453C::chr4_8	YDR453C	TSA2	0.293091	-0.109742	0.259924	0.578714	no	no	no	no
YJL082W::chr10_2	YJL082W	IML2	0.292876	0.101325	0.26007	0.366998	no	no	no	no
YOR324C::chr15_4	YOR324C	FRT1	0.292876	0.182205	0.26007	0.292486	no	no	no	no
YCL006C::chr3_1/chr00_12	deleted	YCL006C	0.292765	0.146564	0.260145	0.324476	no	no	no	no
YML024W::chr13_2	YML024W	RPS17A	0.292677	1.03622	0.260205	0.00321815	no	yes	no	yes
YNR048W::chr14_4	YNR048W	YNR048W	0.292332	0.196517	0.260439	0.280066	no	no	no	no
YPR164W::chr16_5	YPR164W	MMS1	0.292287	1.0528	0.26047	0.00282885	no	yes	no	yes
YGR229C::chr00_2	YGR229C	SMI1	0.292096	1.01631	0.2606	0.00374877	no	no	no	no
YPL039W::chr16_3	YPL039W	YPL039W	0.291644	0.263656	0.260907	0.22545	no	no	no	no
YDL227C::chr4_3	YDL227C	HO	0.291222	0.113749	0.261194	0.355129	no	no	no	no
YGR040W::chr00_14	YGR040W	KSS1	0.290872	0.402724	0.261433	0.133787	no	no	no	no
YOR059C::chr15_1	YOR059C	YOR059C	0.290531	-0.181513	0.261665	0.648654	no	no	no	no
YOR219C::chr15_3	YOR219C	STE13	0.290087	-0.0662115	0.261967	0.534887	no	no	no	no
YGR254W::chr00_17a	YGR254W	ENO1	0.289735	-0.0416424	0.262207	0.509927	no	no	no	no
YCL033C::chr3_1	YCL033C	MXR2	0.289486	-0.0835294	0.262377	0.552405	no	no	no	no
YMR075C-A::chr00_6	YMR075C-A	YMR075C-A	0.289423	0.417171	0.26242	0.125996	no	no	no	no
YML087C::chr13_1b	YML087C	AIM33	0.288882	0.356188	0.262789	0.161097	no	no	no	no
YBR281C::chr00_1	YBR281C	DUG2	0.288744	0.310146	0.262883	0.191466	no	no	no	no
YGL203C::chr7_3	YGL203C	KEX1	0.288092	-0.175705	0.263328	0.643144	yes	no	yes	no
YGL026C::chr7_1	YGL026C	TRP5	0.287966	0.462829	0.263414	0.103475	no	no	no	no
YDR205W::chr00_14	YDR205W	MSC2	0.287876	0.0585718	0.263476	0.408753	no	no	no	no
YPR051W::chr16_4	YPR051W	MAK3	0.287249	0.649076	0.263905	0.0411847	no	no	no	no
YDR073W::chr4_4	YDR073W	SNF11	0.286981	0.0412597	0.264088	0.42599	no	no	no	no
YGR135W::chr7_5	YGR135W	PRE9	0.286526	0.629775	0.264399	0.0457186	no	no	no	no
YOR246C::chr15_3	YOR246C	ENV9	0.286215	0.294971	0.264613	0.202198	no	no	no	no
YPL167C::chr16_2	YPL167C	REV3	0.285833	0.0869318	0.264874	0.380907	no	no	no	no
YMR119W-A::chr00_9	YMR119W-A	YMR119W-A	0.285801	-0.0336562	0.264896	0.501801	no	no	no	no
YIL101C::chr9_2	YIL101C	XBP1	0.285556	-0.0986235	0.265064	0.56759	no	no	no	no
YGL161C::chr7_2	YGL161C	YIP5	0.285182	0.591791	0.265321	0.0558083	no	no	no	no
YCL029C::chr3_1	YCL029C	BIK1	0.285097	0.867398	0.265379	0.0108944	no	no	no	no
YMR106C::chr00_9	YMR106C	YKU80	0.284934	-0.0474639	0.26549	0.515849	no	no	no	no
YFR055W::chr00_2	YFR055W	IRC7	0.284778	0.115973	0.265597	0.353019	no	no	no	no
YDR111C::chr4_4	YDR111C	ALT2	0.284159	0.197567	0.266023	0.279165	no	no	no	no
YLL057C::chr12_1	YLL057C	JLP1	0.283718	0.037536	0.266326	0.429718	no	no	no	no
YLR422W::chr00_4	YLR422W	YLR422W	0.283616	0.662272	0.266396	0.0383	no	yes	no	yes
YDL112W::chr4_2	YDL112W	TRM3	0.282825	0.235876	0.26694	0.247288	no	no	no	no
YNL246W::chr14_1	YNL246W	VPS75	0.282644	0.828966	0.267064	0.0140463	no	no	no	no
YGR071C::chr7_4	YGR071C	ENV11	0.282587	-0.0244727	0.267103	0.492456	no	no	no	no
YOL092W::chr00_6	YOL092W	YOL092W	0.282515	-0.143366	0.267153	0.611939	no	no	no	no
YGR061C::chr7_4	YGR061C	ADE6	0.282374	0.593154	0.26725	0.055418	no	no	no	no
YOR052C::chr15_1	YOR052C	YOR052C	0.28225	0.240358	0.267336	0.24369	no	no	no	no
YDR209C::chr4_5	YDR209C	YDR209C	0.28219	-0.0444069	0.267377	0.51274	no	no	no	no
YGR080W::chr7_4	YGR080W	TWF1	0.282071	0.068085	0.267459	0.399353	no	no	no	no
YJR149W::chr10_4	YJR149W	YJR149W	0.281577	0.139873	0.267799	0.330639	no	no	no	no
YHL043W::chr8_1	YHL043W	ECM34	0.281569	0.120408	0.267805	0.348825	no	no	no	no
YDR094W::chr4_4	YDR094W	YDR094W	0.281105	0.217593	0.268124	0.262255	no	no	no	no
YAL015C::chr1_1	YAL015C	NTG1	0.281058	0.430571	0.268157	0.119059	no	no	no	no
YNL265C::chr14_1	YNL265C	IST1	0.28103	0.236441	0.268176	0.246833	no	no	no	no
YLR181C::chr12_3	YLR181C	VTA1	0.280302	-0.0150846	0.268678	0.482906	no	no	no	no
YOR225W::chr15_3	YOR225W	YOR225W	0.280184	-0.0959925	0.26876	0.56495	no	no	no	no
YPR053C::chr16_4	YPR053C	YPR053C	0.27999	0.333782	0.268894	0.175461	no	no	no	no
YLR188W::chr12_3	YLR188W	MDL1	0.279277	0.199509	0.269386	0.277502	no	no	no	no
YJR009C::chr00_13	YJR009C	TDH2	0.278216	0.224984	0.27012	0.256149	no	no	no	no
YMR283C::chr13_5	YMR283C	RIT1	0.277049	0.0194824	0.270928	0.447872	no	no	no	no
YAL064C-A::chr00_1	YAL064C-A	TDA8	0.276828	0.295291	0.271082	0.201968	no	no	no	no
YMR052W::chr00_5	YMR052W	FAR3	0.276827	-0.0496451	0.271082	0.518066	no	no	no	no
YMR238W::chr13_5	YMR238W	DFG5	0.276777	-0.0627128	0.271117	0.531339	no	no	no	no
YDR490C::chr4_8	YDR490C	PKH1	0.276416	0.44765	0.271367	0.110613	no	no	no	no
YGL153W::chr7_2	YGL153W	PEX14	0.276346	-0.211057	0.271416	0.676184	no	no	no	no
YBR125C::chr00_16a	YBR125C	PTC4	0.276104	0.123636	0.271584	0.345783	no	no	no	no
YJL190C::chr10_1	YJL190C	RPS22A	0.276078	0.621843	0.271602	0.0476945	no	no	no	no
YDR156W::chr4_5	YDR156W	RPA14	0.275032	0.4885	0.272329	0.0921752	no	no	no	no
YMR289W::chr13_5	YMR289W	ABZ2	0.275012	0.191384	0.272342	0.284491	no	no	no	no
YMR233W::chr13_5	YMR233W	TRI1	0.274463	0.0520558	0.272724	0.415222	no	no	no	no
YNL193W::chr14_2	YNL193W	YNL193W	0.274359	0.528307	0.272797	0.0764984	no	no	no	no
YIR026C::chr00_3	YIR026C	YVH1	0.274017	0.274017	0.273035	0.217594	yes	yes	yes	yes
YMR302C::chr13_5	YMR302C	YME2	0.274017	0.274017	0.273035	0.217594	yes	yes	yes	yes
YFR046C::chr00_2	YFR046C	CNN1	0.27281	0.31272	0.273875	0.189681	no	no	no	no
YDR440W::chr4_8	YDR440W	DOT1	0.272785	0.0995525	0.273892	0.368702	no	no	no	no
YOR044W::chr15_1	YOR044W	IRC23	0.272689	-0.114747	0.273959	0.583702	no	no	no	no
YPR147C::chr16_5	YPR147C	YPR147C	0.271474	0.222583	0.274807	0.258124	no	no	no	no
YOR154W::chr15_2	YOR154W	SLP1	0.271451	0.247771	0.274823	0.237802	no	no	no	no
YNL119W::chr00_16b	YNL119W	NCS2	0.27142	0.459572	0.274845	0.104978	no	yes	no	yes
YKL085W::chr11_1	YKL085W	MDH1	0.271352	0.372825	0.274892	0.150943	no	no	no	no
YCR017C::chr3_1	YCR017C	CWH43	0.270901	-0.286929	0.275207	0.742348	no	no	no	no
YPR013C::chr00_15	YPR013C	YPR013C	0.270289	0.750841	0.275635	0.022929	no	no	no	no
YJR019C::chr00_13	YJR019C	TES1	0.269675	0.5407	0.276064	0.0720574	no	no	no	no
YIL123W::chr9_2	YIL123W	SIM1	0.269295	-0.239575	0.27633	0.701876	no	no	no	no
YGR077C::chr7_4	YGR077C	PEX8	0.268485	0.00503465	0.276897	0.462482	no	no	no	no
YPR171W::chr16_5	YPR171W	BSP1	0.267955	-0.0854008	0.277269	0.554292	no	no	no	no
YPR130C::chr16_5	YPR130C	YPR130C	0.267949	0.0927969	0.277273	0.375219	no	no	no	no
YJL209W::chr10_1	YJL209W	CBP1	0.267753	0.62198	0.277411	0.0476599	no	no	no	no
YKL051W::chr11_1	YKL051W	SFK1	0.267568	0.061612	0.27754	0.405743	no	no	no	no
YOL023W::chr15_5	YOL023W	IFM1	0.267491	-0.166421	0.277594	0.634273	no	no	no	no
YER117W::chr00_5	YER117W	RPL23B	0.267373	0.591377	0.277677	0.0559272	no	no	no	no
YOR071C::chr15_1	YOR071C	NRT1	0.267366	0.399394	0.277682	0.135628	no	no	no	no
YJL126W::chr10_2	YJL126W	NIT2	0.267316	-0.0167156	0.277717	0.484565	no	no	no	no
YOR147W::chr15_2	YOR147W	MDM32	0.26725	0.0678799	0.277763	0.399555	no	no	no	no
YLL063C::chr12_1	YLL063C	AYT1	0.266512	0.116298	0.278281	0.352711	no	no	no	no
YER071C::chr5_3	YER071C	TDA2	0.266502	-0.14351	0.278288	0.612081	no	no	no	no
YMR148W::chr13_4	YMR148W	OSW5	0.266233	0.263225	0.278477	0.225781	no	no	no	no
YPL249C::chr16_1	YPL249C	GYP5	0.266124	0.121421	0.278554	0.347869	no	no	no	no
YGR066C::chr7_4	YGR066C	YGR066C	0.266117	0.045577	0.278559	0.421677	no	no	no	no
YDL239C::chr4_3	YDL239C	ADY3	0.265766	0.146101	0.278805	0.324901	no	no	no	no
YGR035C::chr7_4	YGR035C	YGR035C	0.265766	-0.512001	0.278805	0.889665	no	no	no	no
YMR259C::chr13_5	YMR259C	YMR259C	0.265576	-0.748748	0.278939	0.966276	no	no	no	no
YDR125C::chr4_4	YDR125C	ECM18	0.265562	0.630871	0.278949	0.0454507	no	no	no	no
YCR090C::chr00_2	YCR090C	YCR090C	0.265457	0.104386	0.279023	0.364061	no	no	no	no
YER004W::chr5_2	YER004W	FMP52	0.265326	0.140837	0.279115	0.329748	no	no	no	no
YBR222C::chr2_4	YBR222C	PCS60	0.265298	-0.00873582	0.279135	0.476454	no	no	no	no
YOR002W::chr15_1	YOR002W	ALG6	0.265219	0.188899	0.279191	0.286645	no	no	no	no
YLR001C::chr12_1	YLR001C	YLR001C	0.264975	0.0389935	0.279362	0.428258	no	no	no	no
YGL156W::chr7_2	YGL156W	AMS1	0.264548	0.166195	0.279663	0.306675	no	no	no	no
YKL164C::chr11_2	YKL164C	PIR1	0.2641	-0.0670956	0.279978	0.535784	no	no	no	no
YLR303W::chr12_4	YLR303W	MET17	0.263667	-0.0810446	0.280283	0.549897	no	no	no	no
YBR174C::chr2_4	YBR174C	YBR174C	0.263661	-0.0794688	0.280287	0.548305	no	no	no	no
YNL204C::chr14_2	YNL204C	SPS18	0.263501	-0.256064	0.2804	0.716294	no	no	no	no
YCL037C::chr3_1	YCL037C	SRO9	0.263133	0.622481	0.28066	0.0475332	no	no	no	no
YDL177C::chr4_2	YDL177C	YDL177C	0.263045	-0.250153	0.280722	0.711163	no	no	no	no
YIR019C::chr00_3	YIR019C	MUC1	0.262544	-0.299751	0.281075	0.752794	no	no	no	no
YLR248W::chr12_4	YLR248W	RCK2	0.262469	0.162006	0.281128	0.310438	no	no	no	no
YJL216C::chr10_1	YJL216C	IMA5	0.261171	-0.2125	0.282045	0.677506	no	no	no	no
YLR203C::chr12_3	YLR203C	MSS51	0.260219	0.0921075	0.282719	0.375887	no	no	no	no
YCL014W::chr3_1	YCL014W	BUD3	0.259034	-0.0208387	0.283558	0.488758	no	no	no	no
YDL243C::chr4_3	YDL243C	AAD4	0.258929	0.262347	0.283632	0.226455	no	no	no	no
YGL181W::chr7_2	YGL181W	GTS1	0.258929	0.191458	0.283632	0.284427	no	no	no	no
YNL239W::chr14_2	YNL239W	LAP3	0.258929	0.148493	0.283632	0.322708	no	no	no	no
YCL056C::chr3_1	YCL056C	PEX34	0.258929	0.157101	0.283632	0.314869	no	no	no	no
YJR116W::chr00_12	YJR116W	TDA4	0.258929	-0.248099	0.283632	0.709371	no	no	no	no
YOR271C::chr00_17b	YOR271C	FSF1	0.258929	0.00333436	0.283632	0.464205	no	no	no	no
YHL012W::chr8_1	YHL012W	YHL012W	0.258929	0.0368995	0.283632	0.430355	no	no	no	no
YML062C::chr13_1b	YML062C	MFT1	0.258929	0.0759396	0.283632	0.391636	no	no	no	no
YPR047W::chr16_4	YPR047W	MSF1	0.257394	0.193703	0.284721	0.282488	no	no	no	no
YER056C-A::chr5_3	YER056C-A	RPL34A	0.257332	-0.0902013	0.284765	0.559128	no	no	no	no
YLL059C::chr00_8	YLL059C	YLL059C	0.257076	-0.202965	0.284948	0.668732	no	no	no	no
YDL079C::chr4_1	YDL079C	MRK1	0.257039	0.163164	0.284974	0.309396	no	no	no	no
YBR214W::chr2_4	YBR214W	SDS24	0.256968	0.296692	0.285024	0.200963	no	no	no	no
YPR126C::chr16_5	YPR126C	YPR126C	0.256611	0.0151337	0.285278	0.452263	no	no	no	no
YHR103W::chr8_2	YHR103W	SBE22	0.256377	-0.195968	0.285444	0.662233	no	no	no	no
YNL034W::chr14_4	YNL034W	YNL034W	0.256168	-0.0687649	0.285593	0.537475	no	no	no	no
YNL157W::chr14_2	YNL157W	IGO1	0.255601	-0.275254	0.285996	0.73264	no	no	no	no
YHR049C-A::chr8_2	YHR049C-A	YHR049C-A	0.255406	-0.311022	0.286135	0.761786	no	no	no	no
YML113W::chr00_9	YML113W	DAT1	0.254427	-0.00740352	0.286832	0.4751	no	no	no	no
YPR028W::chr16_4	YPR028W	YOP1	0.254092	-0.126832	0.287071	0.595688	no	no	no	no
YGL132W::chr7_2	YGL132W	YGL132W	0.253807	-0.0925361	0.287274	0.561477	yes	no	yes	no
YJL092W::chr10_2	YJL092W	SRS2	0.253561	0.410049	0.28745	0.129796	no	no	no	no
YBR227C::chr2_4	YBR227C	MCX1	0.253182	0.148355	0.28772	0.322834	no	no	no	no
YPL269W::chr16_1	YPL269W	KAR9	0.252854	0.0758654	0.287954	0.391708	no	no	no	no
YJL147C::chr10_1	YJL147C	YJL147C	0.252593	-0.346095	0.288141	0.788588	no	no	no	no
YDL071C::chr4_1	YDL071C	YDL071C	0.251587	0.10558	0.28886	0.362918	no	no	no	no
YGL037C::chr7_1	YGL037C	PNC1	0.251332	0.0618518	0.289042	0.405506	no	no	no	no
YNL201C::chr14_2	YNL201C	PSY2	0.251255	-0.124	0.289097	0.592887	no	no	no	no
YDR540C::chr00_2	YDR540C	IRC4	0.251086	0.0544381	0.289218	0.412854	no	no	no	no
YFR036W::chr00_2	YFR036W	CDC26	0.250846	0.338421	0.289389	0.172423	no	no	no	no
YNL055C::chr00_18	YNL055C	POR1	0.249865	0.698611	0.290093	0.0311986	no	no	no	no
YJR060W::chr00_13	YJR060W	CBF1	0.249591	0.262309	0.290289	0.226483	no	no	no	no
YDL149W::chr4_2	YDL149W	ATG9	0.249257	0.0954198	0.290528	0.372684	no	no	no	no
YEL057C::chr5_2	YEL057C	YEL057C	0.249037	0.0891723	0.290686	0.378731	no	no	no	no
YPR040W::chr16_4	YPR040W	TIP41	0.248958	-0.0697222	0.290742	0.538445	no	no	no	no
YOR127W::chr15_2	YOR127W	RGA1	0.24866	-0.104891	0.290956	0.573869	no	no	no	no
YJL151C::chr00_14	YJL151C	SNA3	0.248229	0.360819	0.291266	0.158227	no	no	no	no
YLR241W::chr12_4	YLR241W	YLR241W	0.247817	0.25966	0.291562	0.228523	no	no	no	no
YER050C::chr5_3	YER050C	RSM18	0.247714	0.221357	0.291635	0.259136	no	no	no	no
YNL266W::chr14_1	YNL266W	YNL266W	0.247119	-0.0140559	0.292063	0.48186	no	no	no	no
YOR299W::chr15_4	YOR299W	BUD7	0.247076	0.214154	0.292094	0.265121	no	no	no	no
YDR405W::chr4_7	YDR405W	MRP20	0.246273	0.391555	0.292671	0.140031	no	no	no	no
YIL064W::chr9_1	YIL064W	SEE1	0.245558	-0.0973002	0.293186	0.566263	no	no	no	no
YMR175W::chr00_4	YMR175W	SIP18	0.245448	-0.378814	0.293265	0.81192	yes	no	yes	no
YKL109W::chr11_2	YKL109W	HAP4	0.244925	0.687415	0.293642	0.0332601	no	no	no	no
YLR018C::chr12_1	YLR018C	POM34	0.244761	0.230691	0.29376	0.251486	no	no	no	no
YPL224C::chr00_11	YPL224C	MMT2	0.244132	-0.231661	0.294214	0.694839	no	no	no	no
YCL048W::chr3_1	YCL048W	SPS22	0.244055	0.0552136	0.294269	0.412084	no	no	no	no
YOR258W::chr15_3	YOR258W	HNT3	0.243247	-0.0810446	0.294852	0.549897	no	no	no	no
YLR047C::chr12_2	YLR047C	FRE8	0.242862	0.339649	0.29513	0.171624	no	no	no	no
YOR301W::chr15_4	YOR301W	RAX1	0.242532	0.0977963	0.295369	0.370392	no	no	no	no
YKR101W::chr00_4	YKR101W	SIR1	0.242441	0.288557	0.295434	0.20684	no	no	no	no
YDR122W::chr4_4	YDR122W	KIN1	0.24168	0.340971	0.295984	0.170767	no	no	no	no
YER108C::chr00_5	YER109C	FLO8	0.241609	-0.231003	0.296035	0.694251	no	no	no	no
YCL001W-A::chr00_1	YCL001W-A	YCL001W-A	0.241081	0.245062	0.296418	0.239945	no	no	no	no
YPL264C::chr16_1	YPL264C	YPL264C	0.240728	-0.259887	0.296673	0.719588	no	no	no	no
YOL006C::chr15_5	YOL006C	TOP1	0.240353	0.794723	0.296945	0.0174878	no	no	no	no
YPR027C::chr16_4	YPR027C	YPR027C	0.240313	0.0487619	0.296974	0.418501	no	no	no	no
YCL044C::chr3_1	YCL044C	MGR1	0.239948	-0.11373	0.297238	0.58269	no	no	no	no
YJR137C::chr10_4	YJR137C	MET5	0.239904	-0.273294	0.29727	0.730993	no	no	no	no
YBR242W::chr2_4	YBR242W	YBR242W	0.239599	0.0909057	0.297491	0.37705	no	no	no	no
YDL200C::chr4_3	YDL200C	MGT1	0.239443	0.0832921	0.297604	0.38445	no	no	no	no
YKL163W::chr11_2	YKL163W	PIR3	0.239098	0.114781	0.297855	0.35415	no	no	no	no
YJL192C::chr10_1	YJL192C	SOP4	0.239054	0.0601629	0.297886	0.407177	no	no	no	no
YER119C::chr00_5	YER119C	AVT6	0.238851	-0.00226711	0.298033	0.469886	no	no	no	no
YER164W::chr00_5	YER164W	CHD1	0.238561	-0.215915	0.298244	0.680625	no	no	no	no
YLR122C::chr12_2	YLR122C	YLR122C	0.238465	-0.118876	0.298314	0.587806	no	no	no	no
YJR106W::chr00_12	YJR106W	ECM27	0.238465	0.0779727	0.298314	0.389645	no	no	no	no
YBR139W::chr2_3	YBR139W	YBR139W	0.238245	0.456356	0.298474	0.106477	no	no	no	no
YGR108W::chr7_4	YGR108W	CLB1	0.237147	-0.161357	0.299271	0.629403	no	no	no	no
YER106W::chr00_5	YER106W	MAM1	0.23679	0.482778	0.299531	0.0946112	no	no	no	no
YOR033C::chr15_1	YOR033C	EXO1	0.23658	0.0550211	0.299683	0.412275	no	no	no	no
YNL120C::chr00_16b	YNL120C	YNL120C	0.236445	1.17902	0.299782	0.00100429	no	yes	no	yes
YOR042W::chr15_1	YOR042W	CUE5	0.236445	-0.290826	0.299782	0.745547	no	no	no	no
YGR169C::chr7_5	YGR169C	PUS6	0.236196	0.198896	0.299963	0.278026	no	no	no	no
YKL044W::chr11_1	YKL044W	YKL044W	0.235954	0.141296	0.300139	0.329324	no	no	no	no
YER158C::chr00_5	YER158C	YER158C	0.235891	-0.277072	0.300184	0.734164	no	no	no	no
YOL087C::chr00_6	YOL087C	DUF1	0.235821	0.769181	0.300236	0.0205023	no	no	no	no
YNL084C::chr14_3	YNL084C	END3	0.235721	0.497904	0.300308	0.0882725	no	no	no	no
YGL082W::chr7_1	YGL082W	YGL082W	0.235082	0.298856	0.300774	0.199416	no	no	no	no
YFL032W::chr6_1	YFL032W	YFL032W	0.234354	-0.208874	0.301304	0.67418	no	no	no	no
YER137C::chr00_5	YER137C	YER137C	0.233242	0.725155	0.302115	0.0267308	no	no	no	no
YEL052W::chr5_2	YEL052W	AFG1	0.233067	0.0476013	0.302243	0.419658	no	no	no	no
YEL042W::chr5_2	YEL042W	GDA1	0.232561	0.0875856	0.302613	0.380272	no	no	no	no
YOR170W::chr15_2	YOR170W	YOR170W	0.232513	-0.318817	0.302648	0.767899	no	no	no	no
YCR002C::chr3_1	YCR002C	CDC10	0.23207	0.302867	0.302971	0.196569	no	no	no	no
YMR055C::chr00_5	YMR055C	BUB2	0.231684	0.353291	0.303254	0.16291	no	no	no	no
YGL176C::chr7_2	YGL176C	YGL176C	0.231448	0.333881	0.303426	0.175396	no	no	no	no
YDL130W-A::chr00_2	YDL130W-A	STF1	0.231388	0.134647	0.30347	0.335485	no	no	no	no
YGL053W::chr7_1	YGL053W	PRM8	0.231038	-0.00403746	0.303726	0.471682	no	no	no	no
YDL160C::chr4_2	YDL160C	DHH1	0.230948	0.230948	0.303792	0.251277	yes	yes	yes	yes
YMR224C::chr13_4	YMR224C	MRE11	0.230948	0.219025	0.303792	0.261066	yes	no	yes	no
YER060W::chr5_3	YER060W	FCY21	0.230914	0.228532	0.303817	0.253244	no	no	no	no
YML068W::chr00_12	YML068W	ITT1	0.2306	0.0224308	0.304047	0.444899	no	no	no	no
YCR005C::chr3_1	YCR005C	CIT2	0.229912	0.0556558	0.30455	0.411645	no	no	no	no
YDR112W::chr4_4	YDR112W	IRC2	0.229485	-0.223382	0.304863	0.6874	no	no	no	no
YDR018C::chr4_3	YDR018C	YDR018C	0.229317	0.393284	0.304987	0.139052	no	no	no	no
YGL083W::chr7_1	YGL083W	SCY1	0.229109	-0.241017	0.305139	0.70315	no	no	no	no
YDR042C::chr4_3	YDR042C	YDR042C	0.229027	-0.461421	0.305199	0.8634	no	no	no	no
YPR062W::chr16_4	YPR062W	FCY1	0.22899	-0.0997677	0.305226	0.568738	no	no	no	no
YDL169C::chr4_2	YDL169C	UGX2	0.228975	-0.162133	0.305237	0.630151	no	no	no	no
YHL013C::chr8_1	YHL013C	OTU2	0.228619	0.460984	0.305499	0.104325	no	no	no	no
YGR079W::chr7_4	YGR079W	YGR079W	0.228417	-0.373588	0.305646	0.808304	no	no	no	no
YLR308W::chr12_4	YLR308W	CDA2	0.228353	-0.0316128	0.305693	0.499722	no	no	no	no
YBR016W::chr2_2	YBR016W	YBR016W	0.228313	0.200061	0.305723	0.27703	no	no	no	no
YLR232W::chr12_4	YLR232W	YLR232W	0.227613	0.372745	0.306237	0.150991	no	no	no	no
YOL104C::chr00_6	YOL104C	NDJ1	0.227521	0.193066	0.306305	0.283037	no	no	no	no
YOR231W::chr15_3	YOR231W	MKK1	0.227409	0.295647	0.306387	0.201712	no	no	no	no
YNL338W::chr14_1	YNL338W	YNL338W	0.227335	-0.169771	0.306441	0.637483	yes	no	yes	no
YGR028W::chr00_14	YGR028W	MSP1	0.22717	0.00309887	0.306562	0.464443	no	no	no	no
YPL136W::chr16_2	YPL136W	YPL136W	0.22646	-0.0247857	0.307084	0.492774	no	no	no	no
YOL079W::chr15_5	YOL079W	YOL079W	0.226254	0.155748	0.307236	0.316095	no	no	no	no
YMR191W::chr00_17b	YMR191W	SPG5	0.225995	-0.131553	0.307426	0.600346	no	no	no	no
YLL061W::chr12_1	YLL061W	MMP1	0.22594	-0.114672	0.307466	0.583628	no	no	no	no
YER174C::chr00_5	YER174C	GRX4	0.225937	0.172685	0.307469	0.300887	no	no	no	no
YLL025W::chr12_1	YLL025W	PAU17	0.225666	0.0326122	0.307668	0.434656	no	no	no	no
YKR093W::chr00_4	YKR093W	PTR2	0.225183	0.257406	0.308024	0.230266	no	no	no	no
YJL012C::chr00_13	YJL012C	VTC4	0.223009	-0.759071	0.309626	0.968203	no	no	no	no
YNL339C::chr14_1	YNL339C	YRF1-6	0.222315	-0.186497	0.310139	0.653359	no	no	no	no
YGR141W::chr7_5	YGR141W	VPS62	0.222053	0.185134	0.310332	0.289923	no	no	no	no
YGR125W::chr7_5	YGR125W	YGR125W	0.221776	0.446256	0.310537	0.111286	no	no	no	no
YGL170C::chr7_2	YGL170C	SPO74	0.221535	0.0484835	0.310715	0.418778	no	no	no	no
YOR096W::chr00_8	YOR096W	RPS7A	0.221454	1.17145	0.310775	0.00107157	no	yes	no	yes
YNR055C::chr00_15	YNR055C	HOL1	0.221023	0.163917	0.311094	0.308719	no	no	no	no
YOR028C::chr15_1	YOR028C	CIN5	0.220931	-0.0294488	0.311161	0.497519	no	no	no	no
YOR043W::chr15_1	YOR043W	WHI2	0.220704	-0.0542429	0.311329	0.522739	no	no	no	no
YNL328C::chr14_1	YNL328C	MDJ2	0.220452	0.218561	0.311516	0.261451	no	no	no	no
YML002W::chr13_2	YML002W	YML002W	0.220433	0.161768	0.31153	0.310652	no	no	no	no
YPL183C::chr00_11	YPL183C	RTT10	0.220144	0.190305	0.311743	0.285426	no	no	no	no
YMR109W::chr00_9	YMR109W	MYO5	0.2194	0.256457	0.312294	0.231002	no	no	no	no
YOR089C::chr15_1	YOR089C	VPS21	0.219302	0.930401	0.312367	0.00704922	no	no	no	no
YJR102C::chr10_4	YJR102C	VPS25	0.219182	0.287609	0.312456	0.207531	no	no	no	no
YDR001C::chr4_3	YDR001C	NTH1	0.218894	0.217272	0.312669	0.262522	no	no	no	no
YLL051C::chr12_1	YLL051C	FRE6	0.218585	0.0800865	0.312899	0.387578	no	no	no	no
YPL134C::chr00_8	YPL134C	ODC1	0.218287	-0.413014	0.31312	0.834534	no	no	no	no
YGR111W::chr7_4	YGR111W	YGR111W	0.217437	-0.135185	0.31375	0.603921	no	no	no	no
YNL187W::chr14_2	YNL187W	SWT21	0.217274	-0.0337862	0.313871	0.501933	no	no	no	no
YJL052W::chr10_2	YJL052W	TDH1	0.217	0.618342	0.314075	0.0485882	no	no	no	no
YGR224W::chr00_2	YGR224W	AZR1	0.216589	-0.131241	0.314379	0.600039	no	no	no	no
YER180C::chr00_5	YER180C	ISC10	0.215572	-0.00122144	0.315135	0.468825	no	no	no	no
YOR230W::chr15_3	YOR230W	WTM1	0.215147	0.41436	0.315451	0.127487	no	no	no	no
YOL065C::chr15_5	YOL065C	INP54	0.214935	0.0458714	0.31561	0.421383	no	no	no	no
YGR022C::chr7_3/chr00_12	YGR022C	YGR022C	0.214883	0.109983	0.315648	0.358712	no	no	no	no
YDL121C::chr4_2	YDL121C	YDL121C	0.214729	-0.0270508	0.315763	0.495079	no	no	no	no
YOR162C::chr15_2	YOR162C	YRR1	0.214076	-0.402049	0.316248	0.827483	no	no	no	no
YGR292W::chr00_17a	YGR292W	MAL12	0.213929	-0.0879106	0.316358	0.556821	no	no	no	no
YJR125C::chr00_12	YJR125C	ENT3	0.213414	0.12819	0.316742	0.34151	no	no	no	no
YDL182W::chr4_2	YDL182W	LYS20	0.213268	0.473171	0.31685	0.0988075	no	no	no	no
YAR003W::chr1_1	YAR003W	SWD1	0.212795	0.490872	0.317203	0.0911788	no	no	no	no
YDL167C::chr4_2	YDL167C	NRP1	0.212683	-0.0217951	0.317287	0.489731	no	no	no	no
YKL147C::chr11_2	YKL147C	YKL147C	0.212426	0.0351017	0.317479	0.432158	no	no	no	no
YJR051W::chr00_13	YJR051W	OSM1	0.212252	-0.269731	0.317608	0.727985	no	no	no	no
YBR250W::chr2_4	YBR250W	SPO23	0.212166	0.123612	0.317673	0.345806	no	no	no	no
YFR034C::chr00_2	YFR034C	PHO4	0.211742	0.194488	0.317989	0.281811	no	no	no	no
YJL133W::chr10_1	YJL133W	MRS3	0.211734	-0.227308	0.317995	0.690937	no	no	no	no
YMR276W::chr13_5	YMR276W	DSK2	0.211688	0.140605	0.318029	0.329962	no	no	no	no
YLR388W::chr12_5	YLR388W	RPS29A	0.211436	1.0501	0.318217	0.00288926	no	no	no	no
YBR033W::chr2_2	YBR033W	EDS1	0.211281	-0.187399	0.318333	0.654208	no	no	no	no
YDL171C::chr4_2	YDL171C	GLT1	0.210834	0.253477	0.318667	0.233323	no	no	no	no
YDR136C::chr4_4	YDR136C	VPS61	0.210661	0.236104	0.318796	0.247104	no	no	no	no
YOL158C::chr00_10	YOL158C	ENB1	0.210566	0.300025	0.318867	0.198584	no	no	no	no
YER005W::chr5_2	YER005W	YND1	0.210303	0.162801	0.319063	0.309722	no	no	no	no
YGL096W::chr7_1	YGL096W	TOS8	0.210116	0.20949	0.319203	0.269033	no	no	no	no
YIL116W::chr9_2	YIL116W	HIS5	0.20946	-0.114013	0.319694	0.582971	no	no	no	no
YGR052W::chr7_4	YGR052W	FMP48	0.209244	-0.0745197	0.319856	0.543302	no	no	no	no
YMR264W::chr13_5	YMR264W	CUE1	0.20919	-0.474551	0.319896	0.870596	no	no	no	no
YLR023C::chr12_1	YLR023C	IZH3	0.208869	0.363606	0.320136	0.156516	no	no	no	no
YDR507C::chr4_8	YDR507C	GIN4	0.208512	0.423781	0.320404	0.12254	no	no	no	no
YKR009C::chr11_3	YKR009C	FOX2	0.207893	0.429948	0.320867	0.119375	no	no	no	no
YJL160C::chr00_14	YJL160C	YJL160C	0.207765	-0.277213	0.320963	0.734282	no	no	no	no
YLR190W::chr12_3	YLR190W	MMR1	0.207648	0.0857828	0.321051	0.382024	no	no	no	no
YPL246C::chr16_1	YPL246C	RBD2	0.207452	0.659803	0.321197	0.0388269	no	no	no	no
YNR050C::chr00_4	YNR050C	LYS9	0.20735	0.609307	0.321274	0.0509562	no	no	no	no
YDL186W::chr4_2	YDL186W	YDL186W	0.207315	-0.0996705	0.321301	0.56864	no	no	no	no
YGL086W::chr7_1	YGL086W	MAD1	0.206993	-0.241282	0.321542	0.703383	no	no	no	no
YGL160W::chr7_2	YGL160W	AIM14	0.206934	0.086551	0.321586	0.381277	no	no	no	no
YGL079W::chr7_1	YGL079W	KXD1	0.20644	-0.166628	0.321957	0.634472	no	no	no	no
YLL041C::chr12_1	YLL041C	SDH2	0.205932	0.27542	0.322338	0.216543	no	no	no	no
YOR285W::chr15_3	YOR285W	RDL1	0.205852	0.12667	0.322398	0.342933	no	no	no	no
YAL061W::chr1_1	YAL061W	BDH2	0.205426	0.314792	0.322718	0.188251	no	no	no	no
YMR318C::chr00_8	YMR318C	ADH6	0.204773	-0.203232	0.323209	0.668978	no	no	no	no
YLR390W::chr12_5	YLR390W	ECM19	0.204105	0.121663	0.323711	0.347641	no	no	no	no
YML058C-A::chr13_1b	YML057C-A	YML057C-A	0.203962	0.160692	0.323818	0.311622	no	no	no	no
YDR221W::chr4_5	YDR221W	GTB1	0.203434	-0.187354	0.324216	0.654165	no	no	no	no
YBR212W::chr2_4	YBR212W	NGR1	0.203233	0.0350948	0.324367	0.432165	no	no	no	no
YKR026C::chr11_3	YKR026C	GCN3	0.202934	0.192995	0.324591	0.283099	no	no	no	no
YLL014W::chr12_1	YLL014W	EMC6	0.202895	-0.0905361	0.324621	0.559465	no	no	no	no
YLR294C::chr12_4	YLR294C	YLR294C	0.201785	0.0326122	0.325457	0.434656	no	no	no	no
YGR201C::chr00_10	YGR201C	YGR201C	0.201504	0.0178152	0.325669	0.449555	yes	no	yes	no
YGR176W::chr7_5	YGR176W	YGR176W	0.201222	0.120463	0.325882	0.348773	no	no	no	no
YDR011W::chr4_3	YDR011W	SNQ2	0.201131	0.307914	0.325951	0.193022	no	no	no	no
YGL046W::chr7_1	YGL045W	RIM8	0.201085	0.120485	0.325985	0.348752	no	no	no	no
YDR195W::chr4_5	YDR195W	REF2	0.200795	0.949623	0.326204	0.00614371	no	no	no	no
YJL068C::chr10_2	YJL068C	YJL068C	0.200556	0.130819	0.326384	0.339052	no	no	no	no
YMR232W::chr13_5	YMR232W	FUS2	0.200317	-0.0984794	0.326565	0.567446	no	no	no	no
YLL024C::chr12_1	YLL024C	SSA2	0.200195	0.261681	0.326657	0.226966	no	no	no	no
YJR001W::chr00_13	YJR001W	AVT1	0.200035	0.196111	0.326777	0.280415	no	no	no	no
YJR146W::chr10_4	YJR146W	YJR146W	0.200035	-0.577885	0.326777	0.918162	no	no	no	no
YOL088C::chr00_6	YOL088C	MPD2	0.199699	-0.156039	0.327031	0.624267	no	no	no	no
YAL062W::chr1_1	YAL062W	GDH3	0.198564	0.0158077	0.327888	0.451582	no	no	no	no
YPL092W::chr16_2	YPL092W	SSU1	0.198493	-0.0613123	0.327943	0.529918	no	no	no	no
YLL049W::chr00_8	YLL049W	LDB18	0.198175	0.0799179	0.328183	0.387743	no	no	no	no
YNR051C::chr00_4	YNR051C	BRE5	0.197802	0.252269	0.328465	0.234267	no	no	no	no
YFR012W::chr6_1	YFR012W	DCV1	0.197665	0.174404	0.328568	0.299362	no	no	no	no
YEL066W::chr5_2	YEL066W	HPA3	0.19736	-0.0812442	0.328799	0.550098	no	no	no	no
YMR133W::chr00_9	YMR133W	REC114	0.197349	0.402144	0.328807	0.134106	no	no	no	no
YDL203C::chr4_3	YDL203C	ACK1	0.197252	-0.00341616	0.328881	0.471052	no	no	no	no
YDL178W::chr4_2	YDL178W	DLD2	0.197236	0.0152091	0.328893	0.452187	no	no	no	no
YIL149C::chr9_2	YIL149C	MLP2	0.196898	-0.0709035	0.329149	0.539641	no	no	no	no
YOR097C::chr15_2	YOR097C	YOR097C	0.196644	0.181476	0.329341	0.293126	no	no	no	no
YOR312C::chr15_4	YOR312C	RPL20B	0.196503	2.00383	0.329448	1.03462e-07	no	yes	no	yes
YLR348C::chr12_5	YLR348C	DIC1	0.196441	-0.0822219	0.329495	0.551085	no	no	no	no
YPR185W::chr16_5	YPR185W	ATG13	0.196113	0.00271067	0.329744	0.464837	no	no	no	no
YLL060C::chr12_1	YLL060C	GTT2	0.195164	-0.0708439	0.330463	0.539581	no	no	no	no
YCL040W::chr3_1	YCL040W	GLK1	0.194577	0.598954	0.330908	0.0537816	no	no	no	no
YMR069W::chr00_6	YMR069W	NAT4	0.194471	0.23227	0.330989	0.250204	no	no	no	no
YHR132W-A::chr00_17b	YHR132W-A	IGO2	0.193489	-0.100523	0.331734	0.569495	no	no	no	no
YOR188W::chr15_2	YOR188W	MSB1	0.192839	-0.00356146	0.332228	0.471199	no	no	no	no
YPL154C::chr16_2	YPL154C	PEP4	0.192111	-0.204131	0.332782	0.669809	no	no	no	no
YCR011C::chr3_1	YCR011C	ADP1	0.191747	-0.0528689	0.333058	0.521343	no	no	no	no
YPL192C::chr16_1	YPL192C	PRM3	0.190995	0.573181	0.33363	0.0613553	no	no	no	no
YCL013W::chr3_1	deleted	YCL013W	0.190559	0.073728	0.333963	0.393804	no	no	no	no
YKR078W::chr00_3	YKR078W	YKR078W	0.190397	0.0408977	0.334086	0.426352	no	no	no	no
YPL259C::chr16_1	YPL259C	APM1	0.18977	0.197381	0.334564	0.279325	no	no	no	no
YHL034C::chr8_1	YHL034C	SBP1	0.189729	0.607288	0.334594	0.0514976	no	no	no	no
YGR221C::chr00_2	YGR221C	TOS2	0.18929	0.195259	0.33493	0.281148	no	no	no	no
YJL100W::chr10_2	YJL100W	LSB6	0.18922	-0.0861576	0.334983	0.555055	no	no	no	no
YGR044C::chr7_4	YGR044C	RME1	0.188739	0.105657	0.33535	0.362844	no	no	no	no
YHR032W::chr00_8	YHR032W	ERC1	0.188617	0.0945112	0.335442	0.373562	no	no	no	no
YFL019C::chr00_15	YFL019C	YFL019C	0.188539	0.0891957	0.335502	0.378709	no	no	no	no
YDL066W::chr4_1	YDL066W	IDP1	0.187962	0.172542	0.335942	0.301014	no	no	no	no
YMR123W::chr00_9	YMR123W	PKR1	0.187962	0.496409	0.335942	0.0888846	no	yes	no	yes
YBR296C::chr00_1	YBR296C	PHO89	0.186979	-0.187436	0.336693	0.654243	no	no	no	no
YGR110W::chr00_14	YGR110W	CLD1	0.186825	0.0314987	0.336811	0.435774	no	no	no	no
YEL039C::chr5_2	YEL039C	CYC7	0.186496	0.169775	0.337062	0.303476	no	no	no	no
YDR135C::chr4_4	YDR135C	YCF1	0.185865	-0.126866	0.337544	0.595722	no	no	no	no
YEL001C::chr5_2	YEL001C	IRC22	0.185841	-0.0957952	0.337563	0.564752	no	no	no	no
YDL012C::chr4_1	YDL012C	YDL012C	0.185705	0.182602	0.337667	0.292138	no	no	no	no
YGR021W::chr7_3	YGR021W	YGR021W	0.185419	0.00505302	0.337886	0.462463	no	no	no	no
YIR038C::chr00_3	YIR038C	GTT1	0.185198	-0.0462433	0.338054	0.514607	no	no	no	no
YHL045W::chr8_1	YHL045W	YHL045W	0.185012	-0.174288	0.338197	0.641794	no	no	no	no
YOR339C::chr15_4	YOR339C	UBC11	0.184168	0.0695694	0.338843	0.397891	no	no	no	no
YPL067C::chr16_3	YPL067C	YPL067C	0.183687	0.246296	0.339211	0.238967	no	no	no	no
YMR188C::chr13_4	YMR188C	MRPS17	0.183584	0.196245	0.339291	0.280299	no	no	no	no
YFR056C::chr00_2	YFR056C	YFR056C	0.183196	0.181939	0.339588	0.292719	no	no	no	no
YPR095C::chr16_4	YPR095C	SYT1	0.18298	0.00452961	0.339754	0.462993	no	no	no	no
YLR260W::chr12_4	YLR260W	LCB5	0.182757	0.973023	0.339924	0.00518152	no	no	no	no
YLR271W::chr12_4	YLR271W	YLR271W	0.182749	-0.117567	0.33993	0.586506	no	no	no	no
YOR066W::chr15_1	YOR066W	MSA1	0.182458	-0.0819698	0.340154	0.550831	no	no	no	no
YGR126W::chr7_5	YGR126W	YGR126W	0.182183	-0.06745	0.340365	0.536143	no	no	no	no
YML102C-A::chr00_9	YML101C-A	YML101C-A	0.181623	0.581628	0.340794	0.0587863	no	no	no	no
YKL064W::chr11_1	YKL064W	MNR2	0.181346	0.0607828	0.341007	0.406563	no	no	no	no
YGR051C::chr7_4	YGR051C	YGR051C	0.181185	0.00824173	0.341131	0.459234	no	no	no	no
YGR132C::chr7_5	YGR132C	PHB1	0.181148	-0.0202503	0.341159	0.48816	no	no	no	no
YDR090C::chr4_4	YDR090C	YDR090C	0.181054	-0.132185	0.341231	0.600969	no	no	no	no
YDL162C::chr4_2	YDL162C	YDL162C	0.180804	-0.100847	0.341423	0.56982	no	no	no	no
YIL084C::chr9_1	YIL084C	SDS3	0.180761	-0.211146	0.341457	0.676266	no	no	no	no
YKL114C::chr11_2	YKL114C	APN1	0.180319	0.243509	0.341796	0.241178	no	no	no	no
YOR363C::chr15_4	YOR363C	PIP2	0.180124	0.0960592	0.341946	0.372067	no	no	no	no
YDL170W::chr4_2	YDL170W	UGA3	0.180106	0.162967	0.341959	0.309573	no	no	no	no
YCL026C-A::chr00_16a	YCL026C-A	FRM2	0.17998	-0.0638741	0.342056	0.532517	no	no	no	no
YGL230C::chr7_3	YGL230C	YGL230C	0.179857	-0.417554	0.342151	0.837397	no	no	no	no
YDL122W::chr4_2	YDL122W	UBP1	0.179785	0.525652	0.342206	0.0774764	no	no	no	no
YCL045C::chr3_1	YCL045C	EMC1	0.179365	-0.338746	0.342529	0.783123	no	no	no	no
YGL087C::chr7_1	YGL087C	MMS2	0.179284	-0.207268	0.342591	0.672703	no	no	no	no
YAL018C::chr1_1	YAL018C	YAL018C	0.17901	-0.0132445	0.342802	0.481036	no	no	no	no
YMR006C::chr13_2	YMR006C	PLB2	0.178841	0.0885858	0.342932	0.3793	no	no	no	no
YDR056C::chr4_4	YDR056C	YDR056C	0.178329	-0.360401	0.343326	0.798992	no	no	no	no
YGR100W::chr7_4	YGR100W	MDR1	0.178259	0.0780572	0.34338	0.389562	no	no	no	no
YDL123W::chr4_2	YDL123W	SNA4	0.177969	0.796554	0.343603	0.0172872	no	no	no	no
YDL093W::chr4_1	YDL093W	PMT5	0.177163	-0.02938	0.344224	0.497449	no	no	no	no
YML120C::chr00_9	YML120C	NDI1	0.177028	-0.262094	0.344328	0.721482	no	no	no	no
YPR172W::chr16_5	YPR172W	YPR172W	0.177017	0.390939	0.344336	0.140382	no	no	no	no
YOL117W::chr00_6	YOL117W	RRI2	0.176858	0.448432	0.344459	0.110237	no	no	no	no
YDR229W::chr4_5	YDR229W	IVY1	0.176856	-0.24933	0.34446	0.710445	no	no	no	no
YKL098W::chr11_2	YKL098W	MTC2	0.176632	-0.0365067	0.344633	0.504702	no	no	no	no
YOR240W::chr15_3	YOR239W	ABP140	0.176352	0.162704	0.344849	0.30981	no	no	no	no
YGR007W::chr7_3	YGR007W	ECT1	0.175669	0.383265	0.345376	0.144793	no	no	no	no
YFL042C::chr00_15	YFL042C	YFL042C	0.175444	-0.217575	0.34555	0.682137	no	no	no	no
YIL069C::chr9_1	YIL069C	RPS24B	0.175179	0.339253	0.345753	0.171881	no	no	no	no
YJL073W::chr10_2	YJL073W	JEM1	0.175179	-0.144857	0.345753	0.613397	no	no	no	no
YKL132C::chr11_2	YKL132C	RMA1	0.175006	0.422818	0.345887	0.123039	no	no	no	no
YLR322W::chr12_4	YLR322W	VPS65	0.174864	0.184615	0.345997	0.290377	no	no	no	no
YGR032W::chr00_14	YGR032W	GSC2	0.174395	0.285731	0.346359	0.208905	no	no	no	no
YIL072W::chr9_1	YIL072W	HOP1	0.174239	-0.0288685	0.34648	0.496929	no	no	no	no
YGR050C::chr00_14	YGR050C	YGR050C	0.17414	0.0326122	0.346556	0.434656	no	no	no	no
YDL237W::chr4_3	YDL237W	AIM6	0.173847	-0.29201	0.346782	0.746515	no	no	no	no
YGL080W::chr7_1	YGL080W	FMP37	0.173475	-0.0494507	0.34707	0.517869	no	no	no	no
YPR092W::chr16_4	YPR092W	YPR092W	0.173255	-0.0337446	0.34724	0.501891	no	no	no	no
YLR250W::chr12_4	YLR250W	SSP120	0.172581	-0.0293176	0.347761	0.497386	no	no	no	no
YOL118C::chr00_6	YOL118C	YOL118C	0.17167	-0.179697	0.348466	0.646935	no	no	no	no
YOR185C::chr15_2	YOR185C	GSP2	0.170054	0.140475	0.349717	0.330083	no	no	no	no
YDR092W::chr4_4	YDR092W	UBC13	0.169907	0.131106	0.349831	0.338784	no	no	no	no
YMR156C::chr13_4	YMR156C	TPP1	0.169893	0.1409	0.349842	0.32969	no	no	no	no
YAL042W::chr1_1	YAL042W	ERV46	0.169585	0.149904	0.350081	0.321418	no	no	no	no
YML119W::chr00_9	YML119W	YML119W	0.169291	-0.281898	0.350308	0.738188	no	no	no	no
YGR019W::chr7_3	YGR019W	UGA1	0.169166	0.120004	0.350406	0.349206	no	no	no	no
YGR234W::chr00_2	YGR234W	YHB1	0.169077	-0.00251607	0.350474	0.470138	no	no	no	no
YBR244W::chr2_4	YBR244W	GPX2	0.16817	-0.185599	0.351178	0.652513	no	no	no	no
YLR283W::chr12_4	YLR283W	YLR283W	0.167989	0.165023	0.351319	0.307726	no	no	no	no
YJR058C::chr00_13	YJR058C	APS2	0.167894	0.392815	0.351393	0.139317	no	no	no	no
YEL008W::chr5_2	YEL008W	YEL008W	0.167864	0.276265	0.351416	0.215911	no	no	no	no
YER162C::chr00_5	YER162C	RAD4	0.167298	0.249104	0.351855	0.236751	no	no	no	no
YPL229W::chr16_1	YPL229W	YPL229W	0.167056	0.108216	0.352044	0.360399	no	no	no	no
YCL046W::chr3_1	YCL046W	YCL046W	0.1669	-0.0431152	0.352165	0.511426	no	no	no	no
YMR223W::chr13_4	YMR223W	UBP8	0.166847	0.0199897	0.352206	0.44736	no	no	no	no
YJL159W::chr10_1	YJL159W	HSP150	0.166432	-0.135951	0.352528	0.604674	no	no	no	no
YMR015C::chr13_2	YMR015C	ERG5	0.165942	0.064321	0.352909	0.403065	no	no	no	no
YJL187C::chr10_1	YJL187C	SWE1	0.165882	0.0266176	0.352956	0.440682	no	no	no	no
YDL222C::chr4_3	YDL222C	FMP45	0.165625	-0.120634	0.353156	0.589551	no	no	no	no
YOR297C::chr15_4	YOR297C	TIM18	0.165167	0.100582	0.353512	0.367712	no	no	no	no
YFL056C::chr6_1	YFL056C	AAD6	0.165062	-0.0612548	0.353594	0.52986	no	no	no	no
YOR350C::chr15_4	YOR350C	MNE1	0.165049	-0.225595	0.353604	0.689397	no	no	no	no
YMR020W::chr13_2	YMR020W	FMS1	0.16486	0.152017	0.35375	0.319489	no	no	no	no
YOR223W::chr15_3	YOR223W	YOR223W	0.164796	-0.198117	0.3538	0.664234	no	no	no	no
YHR078W::chr8_2	YHR078W	YHR078W	0.164713	-0.0532879	0.353865	0.521769	no	no	no	no
YPR052C::chr16_4	YPR052C	NHP6A	0.164601	-0.294505	0.353952	0.748548	no	no	no	no
YER044C-A::chr5_3	YER044C-A	MEI4	0.163661	-0.0674993	0.354684	0.536193	no	no	no	no
YJR094C::chr00_12	YJR094C	IME1	0.162355	-0.943717	0.355702	0.989992	no	no	no	no
YOR216C::chr15_3	YOR216C	RUD3	0.16224	0.128577	0.355791	0.341147	no	no	no	no
YDL026W::chr4_1	YDL026W	YDL026W	0.162035	0.0309702	0.355951	0.436305	no	no	no	no
YOL061W::chr15_5	YOL061W	PRS5	0.161318	-0.0582413	0.356511	0.526801	no	no	no	no
YLR374C::chr12_5	YLR374C	YLR374C	0.161292	0.3418	0.356531	0.170231	no	no	no	no
YMR053C::chr00_5	YMR053C	STB2	0.160788	0.0590977	0.356924	0.408232	no	no	no	no
YIR013C::chr9_2	YIR013C	GAT4	0.160779	-0.371419	0.356932	0.806791	no	no	no	no
YLR041W::chr00_8	YLR041W	YLR041W	0.160779	0.0771505	0.356932	0.390449	no	no	no	no
YOR120W::chr15_2	YOR120W	GCY1	0.160714	-0.523539	0.356982	0.895112	no	no	no	no
YGR210C::chr00_8	YGR210C	YGR210C	0.160614	0.263849	0.35706	0.225303	no	no	no	no
YNL241C::chr14_2	YNL241C	ZWF1	0.160581	0.434983	0.357086	0.116834	no	no	no	no
YOL151W::chr00_17b/chr00_18	YOL151W	GRE2	0.160533	-0.516911	0.357124	0.892007	no	no	no	no
YLL056C::chr12_1	YLL056C	YLL056C	0.160455	0.131466	0.357184	0.338448	no	no	no	no
YBR203W::chr2_4	YBR203W	COS111	0.160365	-0.543301	0.357255	0.903984	no	no	no	no
YDL127W::chr4_2	YDL127W	PCL2	0.160326	-0.0873633	0.357285	0.55627	no	no	no	no
YOR184W::chr15_2	YOR184W	SER1	0.160151	0.497735	0.357422	0.0883417	no	no	no	no
YML027W::chr00_11	YML027W	YOX1	0.159962	0.102575	0.357569	0.365798	no	no	no	no
YCR105W::chr00_2	YCR105W	ADH7	0.159093	0.0371135	0.358248	0.430141	no	no	no	no
YKR080W::chr00_3	YKR080W	MTD1	0.159093	-0.0672231	0.358248	0.535913	no	no	no	no
YFR054C::chr00_2	YFR054C	YFR054C	0.159026	0.0908693	0.358301	0.377086	no	no	no	no
YHR033W::chr8_1	YHR033W	YHR033W	0.158701	-0.200122	0.358555	0.666097	no	no	no	no
YDR072C::chr4_4	YDR072C	IPT1	0.158304	-0.193861	0.358866	0.660266	no	no	no	no
YAL036C::chr1_1	YAL036C	RBG1	0.157905	0.140558	0.359177	0.330005	no	no	no	no
YMR186W::chr13_4	YMR186W	HSC82	0.157391	0.0900976	0.35958	0.377834	no	no	no	no
YLR309C::chr12_4	YLR309C	IMH1	0.157249	-0.122606	0.359691	0.591506	no	no	no	no
YKR066C::chr00_3	YKR066C	CCP1	0.156705	0.297666	0.360117	0.200266	no	no	no	no
YLR385C::chr12_5	YLR385C	SWC7	0.15663	0.00521839	0.360175	0.462295	no	no	no	no
YNL166C::chr14_2	YNL166C	BNI5	0.156391	-0.21097	0.360363	0.676104	no	no	no	no
YOL041C::chr15_5	YOL041C	NOP12	0.156243	0.532329	0.360478	0.075035	no	yes	no	yes
YKL075C::chr11_1	YKL075C	YKL075C	0.15618	0.15618	0.360528	0.315703	yes	yes	yes	yes
YLR172C::chr12_3	YLR172C	DPH5	0.15618	0.0022385	0.360528	0.465315	yes	no	yes	no
YOL048C::chr15_5	YOL048C	RRT8	0.155835	-0.0822778	0.360798	0.551141	no	no	no	no
YNL203C::chr14_2	YNL203C	YNL203C	0.155763	0.203848	0.360855	0.273804	no	no	no	no
YDR479C::chr4_8	YDR479C	PEX29	0.155694	0.250362	0.360909	0.235762	no	no	no	no
YJL030W::chr10_2	YJL030W	MAD2	0.155372	0.566486	0.361161	0.0634529	no	no	no	no
YGL260W::chr7_3	YGL260W	YGL260W	0.155093	-0.0662056	0.36138	0.534881	no	no	no	no
YDR214W::chr4_5	YDR214W	AHA1	0.155048	-0.212908	0.361415	0.67788	no	no	no	no
YOR349W::chr15_4	YOR349W	CIN1	0.154592	0.0568597	0.361773	0.41045	no	no	no	no
YMR004W::chr00_9	YMR004W	MVP1	0.154592	-0.0274352	0.361773	0.49547	no	no	no	no
YOR377W::chr15_4	YOR377W	ATF1	0.154412	-0.0655322	0.361914	0.534199	no	no	no	no
YAR023C::chr1_1	YAR023C	YAR023C	0.153911	0.370418	0.362307	0.152385	no	no	no	no
YOR061W::chr15_1	YOR061W	CKA2	0.153586	0.15821	0.362562	0.313865	no	no	no	no
YGR053C::chr00_14	YGR053C	YGR053C	0.153038	0.256996	0.362992	0.230584	no	no	no	no
YMR207C::chr13_4	YMR207C	HFA1	0.152795	0.15566	0.363183	0.316175	no	no	no	no
YOR138C::chr15_2	YOR138C	RUP1	0.152783	0.316314	0.363192	0.187205	no	no	no	no
YJR107W::chr00_12	YJR107W	YJR107W	0.152729	0.0856734	0.363234	0.382131	no	no	no	no
YAL020C::chr1_1	YAL020C	ATS1	0.152498	0.594717	0.363416	0.0549733	no	no	no	no
YER057C::chr5_3	YER057C	HMF1	0.152261	-0.0676153	0.363603	0.53631	no	no	no	no
YMR095C::chr00_9	YMR095C	SNO1	0.152161	0.072295	0.363681	0.395211	no	no	no	no
YOR376W::chr15_4	YOR376W	YOR376W	0.151103	-0.344797	0.364512	0.787628	no	no	no	no
YGR239C::chr00_14	YGR239C	PEX21	0.151006	-0.452963	0.364589	0.858621	no	no	no	no
YER096W::chr00_8	YER096W	SHC1	0.148976	0.113037	0.366186	0.355806	no	no	no	no
YGL101W::chr7_2	YGL101W	YGL101W	0.148323	0.115412	0.3667	0.353551	no	no	no	no
YNL195C::chr14_2	YNL195C	YNL195C	0.148007	0.0326122	0.36695	0.434656	no	no	no	no
YML057W::chr13_1b	YML057W	CMP2	0.147897	-0.0405226	0.367036	0.508788	no	no	no	no
YPR074C::chr16_4	YPR074C	TKL1	0.14742	-0.154386	0.367412	0.622666	no	no	no	no
YNR020C::chr14_4	YNR020C	ATP23	0.14741	0.257111	0.36742	0.230495	no	no	no	no
YMR187C::chr13_4	YMR187C	YMR187C	0.147377	0.0826735	0.367446	0.385053	no	no	no	no
YEL064C::chr5_2	YEL064C	AVT2	0.147138	-0.0728371	0.367635	0.541599	no	no	no	no
YAR029W::chr1_1	YAR029W	YAR029W	0.146897	-0.136899	0.367825	0.605604	no	no	no	no
YIL173W::chr9_2	YIL173W	VTH1	0.146799	0.299204	0.367902	0.199168	no	no	no	no
YAL007C::chr1_1	YAL007C	ERP2	0.146598	0.135115	0.368061	0.33505	no	no	no	no
YML115C::chr00_15	YML115C	VAN1	0.146531	0.567691	0.368113	0.0630712	no	no	no	no
YMR011W::chr13_2	YMR011W	HXT2	0.146181	0.184918	0.368389	0.290112	no	no	no	no
YGL164C::chr7_2	YGL164C	YRB30	0.146109	0.728744	0.368446	0.0261698	no	no	no	no
YGR139W::chr7_5	YGR139W	YGR139W	0.146035	0.199134	0.368505	0.277823	no	no	no	no
YLR034C::chr00_8	YLR034C	SMF3	0.145641	-0.130524	0.368815	0.599332	no	no	no	no
YOR267C::chr00_17b	YOR267C	HRK1	0.1454	0.0871486	0.369006	0.380696	no	no	no	no
YJR110W::chr10_4	YJR110W	YMR1	0.145348	-0.362964	0.369047	0.800823	no	no	no	no
YCR049C::chr00_1	YCR049C	YCR049C	0.14523	-0.0358198	0.36914	0.504003	no	no	no	no
YDR217C::chr4_5	YDR217C	RAD9	0.145109	-0.136515	0.369236	0.605228	no	no	no	no
YER007C-A::chr5_2	YER007C-A	TMA20	0.145075	0.134178	0.369262	0.335921	no	no	no	no
YPL191C::chr16_1	YPL191C	YPL191C	0.144789	0.24778	0.369488	0.237794	no	no	no	no
YMR166C::chr13_4	YMR166C	YMR166C	0.14463	0.0480042	0.369614	0.419256	no	no	no	no
YIL056W::chr9_1	YIL056W	VHR1	0.14263	0.125294	0.371195	0.344225	no	no	no	no
YPR195C::chr16_5	YPR195C	YPR195C	0.142564	0.165506	0.371247	0.307293	no	no	no	no
YCR020C::chr3_1	YCR020C	PET18	0.1424	0.0288535	0.371377	0.438433	no	no	no	no
YKR102W::chr00_15	YKR102W	FLO10	0.142366	-0.347419	0.371404	0.789563	no	no	no	no
YCR026C::chr00_1	YCR026C	NPP1	0.142139	-0.154027	0.371583	0.622318	no	no	no	no
YPL140C::chr16_2	YPL140C	MKK2	0.141572	0.484234	0.372032	0.0939867	no	yes	no	yes
YFL033C::chr00_17a/chr00_18	YFL033C	RIM15	0.141465	-0.033637	0.372117	0.501782	no	no	no	no
YGL077C::chr7_1	YGL077C	HNM1	0.141311	0.0607358	0.372239	0.40661	no	no	no	no
YMR026C::chr13_2	YMR026C	PEX12	0.141014	0.670042	0.372473	0.03668	no	no	no	no
YMR073C::chr00_6	YMR073C	IRC21	0.14079	-0.338482	0.372651	0.782925	no	no	no	no
YOL080C::chr15_5	YOL080C	REX4	0.14075	-0.0429389	0.372683	0.511246	yes	no	yes	no
YPL032C::chr16_3	YPL032C	SVL3	0.14069	-0.487598	0.372731	0.877483	no	no	no	no
YGR045C::chr7_4	YGR045C	YGR045C	0.140572	-0.0566864	0.372824	0.525222	no	no	no	no
YKL146W::chr11_2	YKL146W	AVT3	0.140198	0.0814389	0.37312	0.386257	no	no	no	no
YBR213W::chr2_4	YBR213W	MET8	0.1401	0.198965	0.373198	0.277967	no	no	no	no
YKL025C::chr11_1	YKL025C	PAN3	0.139938	-0.0165115	0.373326	0.484357	no	no	no	no
YPR073C::chr16_4	YPR073C	LTP1	0.139191	-0.173237	0.373918	0.640793	no	no	no	no
YNL316C::chr00_8	YNL316C	PHA2	0.138786	-0.246155	0.374239	0.707669	no	no	no	no
YGR287C::chr00_3	YGR287C	IMA1	0.138638	-0.0759967	0.374357	0.544796	no	no	no	no
YGL006W::chr7_1	YGL006W	PMC1	0.138634	-0.0698157	0.37436	0.53854	no	no	no	no
YHL028W::chr8_1	YHL028W	WSC4	0.138523	-0.209378	0.374448	0.674644	no	no	no	no
YNR069C::chr00_15	YNR069C	BSC5	0.138282	-0.0319247	0.374639	0.500039	no	no	no	no
YIR034C::chr00_3	YIR034C	LYS1	0.137721	-0.264283	0.375085	0.723354	no	no	no	no
YMR140W::chr13_4	YMR140W	SIP5	0.137554	-0.0663543	0.375217	0.535032	no	no	no	no
YMR206W::chr13_4	YMR206W	YMR206W	0.136981	-0.196725	0.375672	0.662938	no	no	no	no
YLR233C::chr12_4	YLR233C	EST1	0.136549	0.415628	0.376015	0.126813	no	no	no	no
YKL179C::chr11_2	YKL179C	COY1	0.136072	0.21928	0.376394	0.260854	no	no	no	no
YGR162W::chr00_17a	YGR162W	TIF4631	0.135862	0.730406	0.376561	0.0259135	no	no	no	no
YPL065W::chr16_3	YPL065W	VPS28	0.135855	0.421177	0.376566	0.123893	no	no	no	no
YCR092C::chr00_2	YCR092C	MSH3	0.135623	0.382678	0.37675	0.145134	no	no	no	no
YEL071W::chr5_2	YEL071W	DLD3	0.13513	0.0369942	0.377143	0.43026	no	no	no	no
YPL166W::chr16_2	YPL166W	ATG29	0.135004	-0.305201	0.377243	0.757165	no	no	no	no
YFR024C::chr00_15	YFR024C-A	LSB3	0.134707	0.164078	0.377479	0.308574	no	no	no	no
YEL038W::chr5_2	YEL038W	UTR4	0.134579	-0.0387888	0.377581	0.507024	no	no	no	no
YDL157C::chr4_2	YDL157C	YDL157C	0.133709	0.0552136	0.378273	0.412084	no	no	no	no
YGR055W::chr7_4	YGR055W	MUP1	0.133532	0.343798	0.378414	0.168943	no	no	no	no
YGR137W::chr7_5	YGR137W	YGR137W	0.13321	0.272417	0.37867	0.218797	no	no	no	no
YDL134C::chr4_2	YDL134C	PPH21	0.132941	-0.0369933	0.378884	0.505197	no	no	no	no
YBR119W::chr2_3	YBR119W	MUD1	0.131817	-0.63235	0.379779	0.937208	no	no	no	no
YGL124C::chr7_2	YGL124C	MON1	0.131379	0.496409	0.380129	0.0888846	no	yes	no	yes
YPR152C::chr16_5	YPR152C	URN1	0.130206	-0.110007	0.381063	0.578979	no	no	no	no
YDR146C::chr4_4	YDR146C	SWI5	0.129336	0.353185	0.381758	0.162977	no	no	no	no
YLR311C::chr12_4	YLR311C	YLR311C	0.129215	-0.398671	0.381854	0.825273	no	no	no	no
YGR178C::chr7_5	YGR178C	PBP1	0.129031	0.0435888	0.382001	0.423662	no	no	no	no
YMR114C::chr00_9	YMR114C	YMR114C	0.128719	0.375236	0.38225	0.149507	no	no	no	no
YLR044C::chr12_2	YLR044C	PDC1	0.128694	0.0757714	0.38227	0.3918	no	no	no	no
YOR242C::chr15_3	YOR242C	SSP2	0.128301	-0.316286	0.382583	0.765924	no	no	no	no
YLR037C::chr00_8	YLR037C	PAU23	0.127684	-0.0561971	0.383076	0.524725	no	no	no	no
YER080W::chr5_3	YER080W	AIM9	0.126823	0.148168	0.383765	0.323006	no	no	no	no
YML033W::chr13_2	YML034W	SRC1	0.126681	0.284151	0.383878	0.210065	no	no	no	no
YGL023C::chr7_1	YGL023C	PIB2	0.126451	0.263223	0.384062	0.225782	no	no	no	no
YMR037C::chr00_15	YMR037C	MSN2	0.126405	0.198901	0.384098	0.278022	no	no	no	no
YNL014W::chr00_18	YNL014W	HEF3	0.126045	-0.135836	0.384386	0.604561	no	no	no	no
YOR342C::chr15_4	YOR342C	YOR342C	0.126034	0.124035	0.384395	0.345408	no	no	no	no
YLR266C::chr12_4	YLR266C	PDR8	0.125955	0.376471	0.384458	0.148776	no	no	no	no
YDL197C::chr4_3	YDL197C	ASF2	0.125899	-0.0747028	0.384503	0.543487	no	no	no	no
YNR056C::chr00_4	YNR056C	BIO5	0.125294	0.0152151	0.384987	0.452181	no	no	no	no
YLL047W::chr12_1	YLL047W	YLL047W	0.125204	-0.309926	0.385059	0.76092	no	no	no	no
YGL175C::chr7_2	YGL175C	SAE2	0.125153	-0.593573	0.3851	0.924047	yes	no	yes	no
YPR075C::chr16_4	YPR075C	OPY2	0.125123	0.189513	0.385123	0.286112	no	no	no	no
YHR018C::chr8_1	YHR018C	ARG4	0.124836	-0.307932	0.385354	0.759339	no	no	no	no
YER081W::chr5_3	YER081W	SER3	0.124738	-0.107572	0.385432	0.576548	no	no	no	no
YJR119C::chr00_12	YJR119C	JHD2	0.124609	-0.414611	0.385535	0.835545	no	no	no	no
YIL155C::chr9_2	YIL155C	GUT2	0.12452	-0.0198553	0.385607	0.487758	no	no	no	no
YHR006W::chr00_10	YHR006W	STP2	0.124132	-0.176975	0.385917	0.644351	no	no	no	no
YBR269C::chr00_1	YBR269C	FMP21	0.124064	-0.0415697	0.385971	0.509853	no	no	no	no
YKR023W::chr00_14	YKR023W	YKR023W	0.123999	-0.00462075	0.386023	0.472275	no	no	no	no
YMR090W::chr00_6	YMR090W	YMR090W	0.123875	0.197671	0.386123	0.279075	no	no	no	no
YER135C::chr00_5	YER135C	YER135C	0.122509	0.230376	0.387216	0.251742	no	no	no	no
YKL066W::chr11_1	YKL066W	YKL066W	0.12248	-0.103836	0.38724	0.572813	no	no	no	no
YGR184C::chr7_5	YGR184C	UBR1	0.122231	0.224192	0.38744	0.2568	no	no	no	no
YLR036C::chr00_8	YLR036C	YLR036C	0.122094	0.12376	0.387549	0.345667	no	no	no	no
YKL135C::chr11_2	YKL135C	APL2	0.121682	-0.119955	0.38788	0.588878	no	no	no	no
YDL229W::chr4_3	YDL229W	SSB1	0.121448	-0.0318482	0.388068	0.499961	no	no	no	no
YOL119C::chr00_6	YOL119C	MCH4	0.121425	-0.186028	0.388086	0.652917	no	no	no	no
YGL094C::chr7_1	YGL094C	PAN2	0.121384	-0.269503	0.388118	0.727792	no	no	no	no
YLR025W::chr12_1	YLR025W	SNF7	0.121272	0.884309	0.388208	0.00971524	no	no	no	no
YKL038W::chr11_1	YKL038W	RGT1	0.121182	0.444976	0.388281	0.111907	no	no	no	no
YER142C::chr00_5	YER142C	MAG1	0.121054	-0.437069	0.388383	0.849338	no	no	no	no
YBR165W::chr2_3	YBR165W	UBS1	0.120853	0.883131	0.388545	0.00979357	no	no	no	no
YER037W::chr00_11	YER037W	PHM8	0.120779	0.059856	0.388604	0.407481	no	no	no	no
YGL062W::chr7_1	YGL062W	PYC1	0.120405	-0.140867	0.388904	0.609495	no	no	no	no
YPR017C::chr16_4	YPR017C	DSS4	0.120067	0.29864	0.389175	0.199571	no	no	no	no
YLR392C::chr12_5	YLR392C	ART10	0.120005	-0.0679648	0.389224	0.536665	no	no	no	no
YMR158W-A::chr13_4	YMR158W-B	YMR158W-B	0.119985	-0.106332	0.389241	0.575309	no	no	no	no
YMR169C::chr13_4	YMR169C	ALD3	0.119967	-0.24638	0.389255	0.707866	no	no	no	no
YGL049C::chr7_1	YGL049C	TIF4632	0.119954	-0.209507	0.389265	0.674762	no	no	no	no
YBR239C::chr2_4	YBR239C	ERT1	0.11963	-0.183556	0.389526	0.650585	no	no	no	no
YPL104W::chr16_2	YPL104W	MSD1	0.119613	0.659737	0.389539	0.038841	no	no	no	no
YKR006C::chr11_3	YKR006C	MRPL13	0.119338	0.0139405	0.38976	0.453469	no	no	no	no
YDR384C::chr4_7	YDR384C	ATO3	0.119256	0.0428805	0.389826	0.42437	no	no	no	no
YNL194C::chr14_2	YNL194C	YNL194C	0.119256	0.41283	0.389826	0.128303	no	no	no	no
YNL325C::chr14_1	YNL325C	FIG4	0.118499	0.0296543	0.390434	0.437627	no	no	no	no
YKR012C::chr11_3	YKR012C	YKR012C	0.118252	0.018414	0.390632	0.44895	no	no	no	no
YLR461W::chr00_4	YLR461W	PAU4	0.118238	0.155962	0.390644	0.315901	no	no	no	no
YLR113W::chr12_2	YLR113W	HOG1	0.118066	-0.831733	0.390782	0.979343	no	no	no	no
YEL053C::chr5_2	YEL053C	MAK10	0.117983	0.68305	0.390849	0.0340936	no	no	no	no
YLL054C::chr12_1	YLL054C	YLL054C	0.11795	0.0111406	0.390875	0.4563	no	no	no	no
YNL042W::chr14_4	YNL042W	BOP3	0.117885	0.0923184	0.390927	0.375682	no	no	no	no
YGR161C::chr7_5	YGR161C	RTS3	0.117824	0.115433	0.390977	0.353531	no	no	no	no
YNR063W::chr00_4	YNR063W	YNR063W	0.117036	-0.240128	0.39161	0.702365	no	no	no	no
YNL076W::chr00_16b	YNL076W	MKS1	0.116635	-0.061047	0.391932	0.529649	no	no	no	no
YPL198W::chr16_1	YPL198W	RPL7B	0.116607	0.125227	0.391954	0.344288	no	no	no	no
YDR169C::chr4_5	YDR169C	STB3	0.114985	-0.357359	0.39326	0.796805	no	no	no	no
YOR213C::chr15_3	YOR213C	SAS5	0.114909	-0.179682	0.393321	0.64692	no	no	no	no
YPL272C::chr16_1	YPL272C	YPL272C	0.114472	-0.341913	0.393672	0.785488	no	no	no	no
YHR104W::chr8_2	YHR104W	GRE3	0.114362	0.570149	0.393761	0.0622983	no	no	no	no
YOR124C::chr15_2	YOR124C	UBP2	0.113947	0.301209	0.394095	0.197743	no	no	no	no
YDL072C::chr4_1	YDL072C	YET3	0.113878	0.0177498	0.39415	0.449621	no	no	no	no
YIL016W::chr9_1	YIL016W	SNL1	0.113424	-0.110801	0.394516	0.579771	no	no	no	no
YER161C::chr00_5	YER161C	SPT2	0.113078	-0.602624	0.394795	0.927293	no	no	no	no
YOR289W::chr15_4	YOR289W	YOR289W	0.112842	-0.363497	0.394985	0.801202	no	no	no	no
YLR330W::chr12_5	YLR330W	CHS5	0.112796	-0.120123	0.395022	0.589044	no	no	no	no
YHR021C::chr8_1	YHR021C	RPS27B	0.112772	1.68905	0.395042	5.66668e-06	no	yes	no	yes
YGL041C::chr7_1	YGL041C	YGL041C	0.11247	0.0505094	0.395285	0.416761	no	no	no	no
YDR233C::chr4_5	YDR233C	RTN1	0.112342	-0.501461	0.395388	0.884514	no	no	no	no
YCR022C::chr3_1	YCR022C	YCR022C	0.112067	-0.0491408	0.39561	0.517554	no	no	no	no
YCL051W::chr3_1	YCL051W	LRE1	0.111652	0.105194	0.395944	0.363287	no	no	no	no
YDR036C::chr4_3	YDR036C	EHD3	0.111633	0.00930478	0.39596	0.458157	no	no	no	no
YOR177C::chr15_2	YOR177C	MPC54	0.111234	0.215834	0.396282	0.263719	no	no	no	no
YML099C::chr00_9	YML099C	ARG81	0.111027	-0.128569	0.396449	0.597403	no	no	no	no
YAR002C-A::chr00_16a	YAR002C-A	ERP1	0.110995	0.228163	0.396474	0.253546	no	no	no	no
YKR094C::chr00_15	YKR094C	RPL40B	0.110547	0.187007	0.396836	0.28829	no	no	no	no
YDR076W::chr4_4	YDR076W	RAD55	0.110332	0.541364	0.397009	0.071825	no	no	no	no
YIR032C::chr00_17b	YIR032C	DAL3	0.110208	-0.0402039	0.397109	0.508464	no	no	no	no
YLR058C::chr12_2	YLR058C	SHM2	0.109551	-0.0398575	0.39764	0.508111	no	no	no	no
YEL014C::chr5_2	YEL014C	YEL014C	0.109459	-0.10668	0.397714	0.575657	no	no	no	no
YDR241W::chr4_5	YDR241W	BUD26	0.109386	0.109386	0.397773	0.359282	yes	yes	yes	yes
YCR087C-A::chr00_1	YCR087C-A	YCR087C-A	0.109034	0.0212079	0.398057	0.446132	no	no	no	no
YEL020C::chr5_2	YEL020C	YEL020C	0.108624	-0.152943	0.398388	0.621267	no	no	no	no
YOL122C::chr00_6	YOL122C	SMF1	0.107905	-0.0533927	0.398969	0.521876	no	no	no	no
YNL063W::chr14_3	YNL063W	MTQ1	0.106926	0.148089	0.399761	0.323078	no	no	no	no
YOR085W::chr15_1	YOR085W	OST3	0.106667	0.0782209	0.39997	0.389402	no	no	no	no
YHR131C::chr00_10	YHR131C	YHR131C	0.106654	-0.556043	0.39998	0.909405	yes	no	yes	no
YOR064C::chr15_1	YOR064C	YNG1	0.106513	-0.0572733	0.400094	0.525818	no	no	no	no
YGR199W::chr7_5	YGR199W	PMT6	0.10603	-0.381305	0.400485	0.813629	no	no	no	no
YIL053W::chr9_1	YIL053W	RHR2	0.105286	-0.354411	0.401087	0.794673	no	no	no	no
YDR471W::chr4_8	YDR471W	RPL27B	0.105232	0.891692	0.40113	0.00923644	no	no	no	no
YJR078W::chr10_4	YJR078W	BNA2	0.104514	-0.0531635	0.401711	0.521643	no	no	no	no
YGL007W::chr7_1	YGL007W	BRP1	0.104376	-0.0953043	0.401823	0.564259	no	no	no	no
YCR028C::chr00_1	YCR028C	FEN2	0.104108	0.59265	0.40204	0.055562	no	no	no	no
YPL158C::chr00_18	YPL158C	AIM44	0.103758	0.0116271	0.402323	0.455808	no	no	no	no
YOL043C::chr15_5	YOL043C	NTG2	0.103715	-0.0399557	0.402359	0.508211	no	no	no	no
YOL129W::chr00_6	YOL129W	VPS68	0.103397	-0.115567	0.402615	0.584518	no	no	no	no
YPL096W::chr16_2	YPL096W	PNG1	0.103134	0.156763	0.402829	0.315175	no	no	no	no
YKL159C::chr11_2	YKL159C	RCN1	0.103011	-0.154632	0.402929	0.622905	no	no	no	no
YMR278W::chr13_5	YMR278W	PGM3	0.102458	0.012136	0.403377	0.455293	no	no	no	no
YPR167C::chr16_5	YPR167C	MET16	0.101546	-0.102976	0.404116	0.571952	no	no	no	no
YIL065C::chr9_1	YIL065C	FIS1	0.10122	-0.343992	0.40438	0.787032	no	no	no	no
YMR118C::chr00_15	YMR118C	SHH3	0.101208	-0.0728142	0.40439	0.541576	no	no	no	no
YPL222W::chr16_1	YPL222W	FMP40	0.100927	-0.543417	0.404618	0.904035	no	no	no	no
YOR276W::chr00_17b	YOR276W	CAF20	0.100337	-0.615302	0.405096	0.931659	no	no	no	no
YLL038C::chr12_1	YLL038C	ENT4	0.10017	0.314614	0.405232	0.188374	no	no	no	no
YCR075C::chr00_16a	YCR075C	ERS1	0.100088	-0.176007	0.405298	0.643431	no	no	no	no
YEL072W::chr5_2	YEL072W	RMD6	0.0996208	-0.014221	0.405677	0.482028	no	no	no	no
YGR271W::chr00_17a	YGR271W	SLH1	0.0995421	0.157442	0.405741	0.314559	no	no	no	no
YFR049W::chr00_2	YFR049W	YMR31	0.0994443	0.131151	0.40582	0.338742	no	no	no	no
YKR055W::chr11_3	YKR055W	RHO4	0.099272	0.0122922	0.40596	0.455135	no	no	no	no
YGR117C::chr00_14	YGR117C	YGR117C	0.09926	0.0554722	0.40597	0.411827	no	no	no	no
YMR041C::chr13_2	YMR041C	ARA2	0.0990573	0.0382587	0.406134	0.428994	no	no	no	no
YJL201W::chr10_1	YJL201W	ECM25	0.0987263	-0.418414	0.406403	0.837936	no	no	no	no
YPL219W::chr16_1	YPL219W	PCL8	0.098464	-0.287772	0.406616	0.743042	no	no	no	no
YNL078W::chr00_16b	YNL078W	NIS1	0.0980747	-0.018269	0.406932	0.486145	no	no	no	no
YNL285W::chr14_1	YNL285W	YNL285W	0.0973105	0.307093	0.407553	0.193596	no	no	no	no
YLR456W::chr00_4	YLR456W	YLR456W	0.097099	0.151553	0.407725	0.319912	no	no	no	no
YFR006W::chr6_1	YFR006W	YFR006W	0.0969805	-0.0863967	0.407821	0.555296	no	no	no	no
YAL026C::chr1_1	YAL026C	DRS2	0.0966572	0.399394	0.408084	0.135628	no	no	no	no
YLR273C::chr12_4	YLR273C	PIG1	0.0960553	-0.430952	0.408573	0.84566	no	no	no	no
YKL041W::chr11_1	YKL041W	VPS24	0.095745	0.200368	0.408825	0.276768	no	yes	no	yes
YJR031C::chr00_13	YJR031C	GEA1	0.0955613	-0.0649586	0.408975	0.533617	no	no	no	no
YMR119W::chr00_15	YMR119W	ASI1	0.0954299	0.0915058	0.409081	0.376469	no	no	no	no
YOL128C::chr00_6	YOL128C	YGK3	0.0954299	0.221274	0.409081	0.259205	no	no	no	no
YJL021C::chr00_13	YJL020C	BBC1	0.0951994	-0.129174	0.409269	0.598001	no	no	no	no
YDL037C::chr4_1	YDL037C	BSC1	0.0949291	-0.116926	0.409489	0.585869	no	no	no	no
YLR040C::chr00_8	YLR040C	YLR040C	0.0948093	0.0124745	0.409586	0.454951	no	no	no	no
YAL021C::chr1_1	YAL021C	CCR4	0.0945419	0.459572	0.409804	0.104978	no	yes	no	yes
YJL158C::chr10_1	YJL158C	CIS3	0.0944346	-0.45049	0.409891	0.857203	no	no	no	no
YDR192C::chr4_5	YDR192C	NUP42	0.0939828	-0.00192025	0.410259	0.469534	no	no	no	no
YDR304C::chr4_6	YDR304C	CPR5	0.0936288	-0.202447	0.410547	0.668252	no	no	no	no
YHR010W::chr8_1	YHR010W	RPL27A	0.0934445	0.0934445	0.410697	0.374593	yes	yes	yes	yes
YHR077C::chr8_2	YHR077C	NMD2	0.0926793	-0.159574	0.41132	0.627684	no	no	no	no
YHR048W::chr8_2	YHR048W	YHK8	0.0921751	-0.149301	0.41173	0.617728	no	no	no	no
YLR279W::chr12_4	YLR279W	YLR279W	0.0921751	-0.0396767	0.41173	0.507927	no	no	no	no
YLR217W::chr12_3	YLR217W	YLR217W	0.0920314	-0.170205	0.411847	0.637897	no	no	no	no
YOR055W::chr15_1	YOR055W	YOR055W	0.091974	-0.025868	0.411894	0.493875	no	no	no	no
YJL162C::chr10_1	YJL162C	JJJ2	0.0919626	-0.242036	0.411903	0.704049	no	no	no	no
YMR263W::chr13_5	YMR263W	SAP30	0.0915984	0.180416	0.4122	0.294057	no	no	no	no
YJL105W::chr00_15	YJL105W	SET4	0.0914688	-0.313224	0.412305	0.763522	no	no	no	no
YJR084W::chr00_12	YJR084W	YJR084W	0.0913746	-0.568838	0.412382	0.914616	no	no	no	no
YJL099W::chr10_2	YJL099W	CHS6	0.0913174	-0.0558423	0.412429	0.524364	no	no	no	no
YLR352W::chr12_5	YLR352W	YLR352W	0.0910416	0.141341	0.412654	0.329283	no	no	no	no
YIL111W::chr9_2	YIL111W	COX5B	0.0909707	0.174096	0.412711	0.299635	no	no	no	no
YDL019C::chr4_1	YDL019C	OSH2	0.0908763	-0.12442	0.412788	0.593303	no	no	no	no
YJR025C::chr00_13	YJR025C	BNA1	0.0907172	-0.0733034	0.412918	0.542071	no	no	no	no
YOR238W::chr15_3	YOR238W	YOR238W	0.0906379	-0.0290509	0.412982	0.497114	no	no	no	no
YKR100C::chr00_4	YKR100C	SKG1	0.090423	-0.101405	0.413158	0.570379	no	no	no	no
YFR053C::chr00_2	YFR053C	HXK1	0.0903035	-0.0322005	0.413255	0.50032	no	no	no	no
YPL181W::chr16_2	YPL181W	CTI6	0.0903005	0.116676	0.413258	0.352353	no	no	no	no
YGL067W::chr7_1	YGL067W	NPY1	0.0894169	0.034998	0.413978	0.432262	no	no	no	no
YJR117W::chr00_12	YJR117W	STE24	0.0893774	-0.170921	0.41401	0.638582	no	no	no	no
YPL212C::chr16_1	YPL212C	PUS1	0.0889526	0.18838	0.414356	0.287096	no	no	no	no
YGL256W::chr7_3	YGL256W	ADH4	0.088707	0.0505229	0.414557	0.416747	no	no	no	no
YJR004C::chr00_13	YJR004C	SAG1	0.0885471	0.293183	0.414687	0.203486	no	no	no	no
YDL096C::chr4_2	YDL096C	OPI6	0.0883849	-0.077284	0.41482	0.546097	no	no	no	no
YHL008C::chr8_1	YHL008C	YHL008C	0.0883752	-0.676938	0.414828	0.950066	no	no	no	no
YGR222W::chr00_2	YGR222W	PET54	0.0880793	0.433362	0.415069	0.117648	no	no	no	no
YJR061W::chr00_13	YJR061W	YJR061W	0.0880125	0.186269	0.415123	0.288934	no	no	no	no
YGL050W::chr7_1	YGL050W	TYW3	0.0875143	0.0329767	0.41553	0.43429	no	no	no	no
YDR030C::chr4_3	YDR030C	RAD28	0.0874485	-0.0858024	0.415584	0.554697	no	no	no	no
YOR381W::chr15_4	YOR381W	FRE3	0.0873173	0.0907151	0.415691	0.377235	no	no	no	no
YIL001W::chr9_1	YIL001W	YIL001W	0.0873173	-0.27441	0.415691	0.731932	no	no	no	no
YBR245C::chr2_4	YBR245C	ISW1	0.0860921	0.00661695	0.416691	0.460879	no	no	no	no
YEL041W::chr5_2	YEL041W	YEF1	0.0855705	0.0510087	0.417117	0.416264	no	no	no	no
YOR092W::chr15_1	YOR092W	ECM3	0.0852368	-0.428362	0.41739	0.844085	no	no	no	no
YLR219W::chr12_3	YLR219W	MSC3	0.0851616	-0.590318	0.417451	0.922854	no	no	no	no
YOL124C::chr00_6	YOL124C	TRM11	0.0847542	-0.199777	0.417784	0.665776	no	no	no	no
YKR072C::chr00_3	YKR072C	SIS2	0.0844309	0.33323	0.418048	0.175825	no	no	no	no
YOL081W::chr15_5	YOL081W	IRA2	0.0844309	0.106613	0.418048	0.36193	no	no	no	no
YOR277C::chr15_3	YOR277C	YOR277C	0.084414	-0.123338	0.418062	0.592231	no	no	no	no
YPR111W::chr16_5	YPR111W	DBF20	0.083515	0.399827	0.418797	0.135387	no	no	no	no
YLR408C::chr12_5	YLR408C	BLS1	0.0834633	-0.211146	0.418839	0.676266	no	no	no	no
YNL051W::chr00_16b	YNL051W	COG5	0.0831111	0.707931	0.419127	0.0295642	no	no	no	no
YOR163W::chr15_2	YOR163W	DDP1	0.0830405	0.0777372	0.419185	0.389875	no	no	no	no
YGR039W::chr7_4	YGR039W	YGR039W	0.0829673	-0.0435984	0.419245	0.511917	no	no	no	no
YGR151C::chr7_5	YGR151C	YGR151C	0.0828225	-0.143327	0.419363	0.611902	no	no	no	no
YCL076W::chr00_12	YCL076W	YCL076W	0.0827918	-0.259265	0.419388	0.719053	no	no	no	no
YNL211C::chr14_2	YNL211C	YNL211C	0.0827761	-0.0853316	0.419401	0.554222	no	no	no	no
YKL218C::chr11_3	YKL218C	SRY1	0.0826674	-0.0660934	0.41949	0.534768	no	no	no	no
YDL104C::chr4_2	YDL104C	QRI7	0.0826459	0.00914691	0.419507	0.458317	no	no	no	no
YDR219C::chr4_5	YDR219C	MFB1	0.0822081	-0.0410819	0.419866	0.509357	no	no	no	no
YDL101C::chr4_2	YDL101C	DUN1	0.0819993	0.0106975	0.420036	0.456748	no	no	no	no
YLR288C::chr12_4	YLR288C	MEC3	0.0818439	-0.241149	0.420164	0.703266	no	no	no	no
YDL024C::chr4_1	YDL024C	DIA3	0.0815244	-0.0341286	0.420425	0.502282	no	no	no	no
YIL086C::chr9_1	YIL086C	YIL086C	0.0815091	0.501231	0.420437	0.0869221	no	no	no	no
YGR263C::chr00_3	YGR263C	SAY1	0.0803314	-0.165614	0.421401	0.633498	no	no	no	no
YPL227C::chr16_1	YPL227C	ALG5	0.0802879	-0.126344	0.421437	0.595206	no	no	no	no
YDL154W::chr4_2	YDL154W	MSH5	0.0800795	0.0497205	0.421608	0.417546	no	no	no	no
YFL053W::chr6_1	YFL053W	DAK2	0.0800106	0.571478	0.421664	0.0618835	no	no	no	no
YJL055W::chr10_2	YJL055W	YJL055W	0.0795109	-0.234978	0.422073	0.697798	no	no	no	no
YDL223C::chr4_3	YDL223C	HBT1	0.0793793	-0.169777	0.422181	0.637488	no	no	no	no
YMR271C::chr00_8	YMR271C	URA10	0.0781252	0.125984	0.423208	0.343578	no	no	no	no
YGR031W::chr7_4	YGR031W	IMO32	0.0777678	-0.0761402	0.423501	0.544941	no	no	no	no
YDR459C::chr4_8	YDR459C	PFA5	0.0773248	-0.2059	0.423864	0.671442	yes	no	yes	no
YDR152W::chr4_5	YDR152W	GIR2	0.0773097	-0.29659	0.423877	0.75024	yes	no	yes	no
YFR045W::chr00_2	YFR045W	YFR045W	0.0773097	-0.265054	0.423877	0.724011	yes	no	yes	no
YPR023C::chr00_15	YPR023C	EAF3	0.0772723	0.0372288	0.423907	0.430025	no	no	no	no
YDL119C::chr4_2	YDL119C	YDL119C	0.0771525	0.0564326	0.424005	0.410874	no	no	no	no
YDL201W::chr4_3	YDL201W	TRM8	0.0770589	-0.063147	0.424082	0.53178	no	no	no	no
YHR092C::chr8_2	YHR092C	HXT4	0.0764916	0.497225	0.424547	0.0885501	no	no	no	no
YCR036W::chr00_1	YCR036W	RBK1	0.0764036	-0.433706	0.424619	0.847323	no	no	no	no
YKR015C::chr11_3	YKR015C	YKR015C	0.0748967	-0.475075	0.425855	0.870878	no	no	no	no
YOR239W::chr15_3	YOR239W	ABP140	0.0747497	-0.0479729	0.425976	0.516366	no	no	no	no
YMR077C::chr00_6	YMR077C	VPS20	0.0740201	0.664941	0.426575	0.0377371	no	no	no	no
YKL162C::chr11_2	YKL162C	YKL162C	0.0740084	-0.268756	0.426584	0.727159	no	no	no	no
YGR043C::chr7_4	YGR043C	NQM1	0.0736864	0.21652	0.426849	0.263147	no	no	no	no
YGR093W::chr00_14	YGR093W	YGR093W	0.0735394	0.0422947	0.426969	0.424955	no	no	no	no
YLR361C::chr00_11	YLR361C	DCR2	0.0733056	-0.186985	0.427161	0.653818	no	no	no	no
YOR365C::chr15_4	YOR365C	YOR365C	0.0730621	-0.296511	0.427361	0.750176	no	no	no	no
YDR115W::chr4_4	YDR115W	YDR115W	0.0725446	0.426644	0.427786	0.121063	no	yes	no	yes
YNL299W::chr14_1	YNL299W	TRF5	0.0723311	0.439878	0.427962	0.114402	no	no	no	no
YMR173W-A::chr13_4	YMR173W-A	YMR173W-A	0.0722973	0.0617095	0.427989	0.405646	no	no	no	no
YBR189W::chr00_14	YBR189W	RPS9B	0.0721602	0.544106	0.428102	0.070872	no	yes	no	yes
YGR203W::chr7_5	YGR203W	YCH1	0.0719806	-0.176988	0.428249	0.644364	no	no	no	no
YGR153W::chr7_5	YGR153W	YGR153W	0.0712612	0.0871613	0.42884	0.380684	no	no	no	no
YIL009C-A::chr00_3	YIL009C-A	EST3	0.0707167	-0.100419	0.429288	0.569391	no	no	no	no
YDR004W::chr4_3	YDR004W	RAD57	0.0704072	0.274449	0.429542	0.21727	no	no	no	no
YPL177C::chr16_2	YPL177C	CUP9	0.0703646	0.0709092	0.429577	0.396573	no	no	no	no
YGR143W::chr7_5	YGR143W	SKN1	0.0702671	-0.137313	0.429657	0.606011	no	no	no	no
YKR089C::chr00_4	YKR089C	TGL4	0.0699973	-0.220927	0.429879	0.685179	no	no	no	no
YLR031W::chr00_8	YLR031W	YLR031W	0.0699437	0.138028	0.429923	0.332346	no	no	no	no
YIL070C::chr9_1	YIL070C	MAM33	0.0691443	-0.21511	0.43058	0.679891	no	no	no	no
YBR246W::chr2_4	YBR246W	RRT2	0.0691041	-0.0828651	0.430613	0.551734	no	no	no	no
YOR058C::chr15_1	YOR058C	ASE1	0.0689858	0.0653773	0.430711	0.402023	no	no	no	no
YPL081W::chr16_3	YPL081W	RPS9A	0.0689577	-0.0129689	0.430734	0.480755	no	no	no	no
YDL190C::chr4_2	YDL190C	UFD2	0.0685922	-0.170984	0.431034	0.638642	no	no	no	no
YDL124W::chr4_2	YDL124W	YDL124W	0.0683038	-0.0523719	0.431271	0.520838	no	no	no	no
YER163C::chr00_5	YER163C	YER163C	0.0682887	0.154401	0.431284	0.317319	no	no	no	no
YDR051C::chr4_4	YDR051C	DET1	0.0680562	0.0728493	0.431475	0.394667	no	no	no	no
YKR090W::chr00_4	YKR090W	PXL1	0.0679055	-0.176754	0.431599	0.644141	no	no	no	no
YJL135W::chr10_1	YJL135W	YJL135W	0.0674744	0.188323	0.431954	0.287145	no	no	no	no
YGL072C::chr7_1	YGL072C	YGL072C	0.0674606	0.356572	0.431965	0.160858	no	no	no	no
YIL079C::chr9_1	YIL079C	AIR1	0.0673942	-0.141446	0.43202	0.610062	yes	no	yes	no
YAL014C::chr1_1	YAL014C	SYN8	0.0673038	0.100412	0.432094	0.367875	no	no	no	no
YBL072C::chr2_1	YBL072C	RPS8A	0.0672103	0.660194	0.432171	0.038743	no	no	no	no
YER019W::chr5_3	YER019W	ISC1	0.0669592	0.247818	0.432378	0.237764	no	no	no	no
YOR328W::chr15_4	YOR328W	PDR10	0.0669401	-0.124336	0.432393	0.593219	no	no	no	no
YIR030C::chr00_17b	YIR030C	DCG1	0.0662892	-0.107884	0.432929	0.57686	no	no	no	no
YOR031W::chr15_1	YOR031W	CRS5	0.0662836	-0.125817	0.432934	0.594685	no	no	no	no
YPL152W::chr16_2	YPL152W	RRD2	0.0662836	-0.0134843	0.432934	0.481279	no	no	no	no
YBR270C::chr00_16a	YBR270C	BIT2	0.0660867	-0.316773	0.433096	0.766305	no	no	no	no
YCR023C::chr3_1	YCR023C	YCR023C	0.0653848	-0.0183019	0.433674	0.486178	no	no	no	no
YJL066C::chr10_2	YJL066C	MPM1	0.0652876	-0.125753	0.433754	0.594622	no	no	no	no
YJR115W::chr10_4	YJR115W	YJR115W	0.064819	0.0180562	0.434139	0.449311	no	no	no	no
YEL046C::chr5_2	YEL046C	GLY1	0.064728	-0.34125	0.434214	0.784994	no	no	no	no
YOR248W::chr15_3	YOR248W	YOR248W	0.0628018	-0.247468	0.435801	0.708819	no	no	no	no
YPL139C::chr16_2	YPL139C	UME1	0.0627258	0.103803	0.435864	0.36462	no	no	no	no
YDL146W::chr4_2	YDL146W	LDB17	0.0614741	-0.182768	0.436896	0.649841	no	no	no	no
YDL125C::chr4_2	YDL125C	HNT1	0.061023	-1.02366	0.437268	0.994296	yes	no	yes	no
YER134C::chr00_5	YER134C	YER134C	0.061023	-0.289316	0.437268	0.74431	yes	no	yes	no
YGL085W::chr7_1	YGL085W	LCL3	0.0609314	-0.0739805	0.437343	0.542756	no	no	no	no
YOL029C::chr15_5	YOL029C	YOL029C	0.0609287	-0.136471	0.437345	0.605184	no	no	no	no
YDR075W::chr4_4	YDR075W	PPH3	0.0607107	-0.293544	0.437525	0.747765	no	no	no	no
YJL023C::chr00_13	YJL023C	PET130	0.0605151	-0.0375814	0.437686	0.505795	no	no	no	no
YPR018W::chr16_4	YPR018W	RLF2	0.0600778	0.45012	0.438047	0.109428	no	no	no	no
YDL010W::chr4_1	YDL010W	GRX6	0.0600246	0.0707473	0.438091	0.396733	no	no	no	no
YNR059W::chr00_4	YNR059W	MNT4	0.0599952	0.0600183	0.438115	0.40732	no	no	no	no
YMR170C::chr13_4	YMR170C	ALD2	0.059773	0.125722	0.438299	0.343824	no	no	no	no
YAR014C::chr1_1	YAR014C	BUD14	0.0595577	0.199891	0.438476	0.277176	no	no	no	no
YGL081W::chr7_1	YGL081W	YGL081W	0.0593749	-0.0260492	0.438627	0.49406	no	no	no	no
YDR520C::chr4_8	YDR520C	URC2	0.0592426	-0.0999062	0.438736	0.568877	no	no	no	no
YKR005C::chr11_3	YKR005C	YKR005C	0.0589205	-0.396116	0.439002	0.823589	no	no	no	no
YER011W::chr5_2	YER011W	TIR1	0.058732	-0.128722	0.439157	0.597554	no	no	no	no
YCL069W::chr3_1	YCL069W	VBA3	0.0582676	-0.116032	0.439541	0.58498	no	no	no	no
YLR394W::chr00_11	YLR394W	CST9	0.0581185	0.0638849	0.439664	0.403496	no	no	no	no
YPR042C::chr16_4	YPR042C	PUF2	0.0579801	0.123515	0.439778	0.345898	no	no	no	no
YNL024C::chr14_4	YNL024C	YNL024C	0.0578368	0.00228028	0.439896	0.465273	no	no	no	no
YKL063C::chr11_1	YKL063C	YKL063C	0.0575839	0.00952854	0.440105	0.457931	no	no	no	no
YDR144C::chr4_4	YDR144C	MKC7	0.0574867	-0.0654521	0.440185	0.534118	no	no	no	no
YOL114C::chr00_6	YOL114C	YOL114C	0.0572948	-0.0765096	0.440344	0.545314	no	no	no	no
YHR001W-A::chr8_1	YHR001W-A	QCR10	0.0569698	-0.0788344	0.440612	0.547664	no	no	no	no
YIL141W::chr9_2	YIL141W	YIL141W	0.0567067	-0.109022	0.440829	0.577996	no	no	no	no
YIL067C::chr9_1	YIL067C	YIL067C	0.0566976	-0.172482	0.440837	0.640073	no	no	no	no
YIL167W::chr9_2	YIL167W	SDL1	0.0565206	-0.063833	0.440983	0.532475	no	no	no	no
YGR150C::chr7_5	YGR150C	CCM1	0.0558353	0.137634	0.441549	0.332712	no	no	no	no
YLR239C::chr12_4	YLR239C	LIP2	0.0556616	0.106765	0.441692	0.361785	no	no	no	no
YPR160W::chr16_5	YPR160W	GPH1	0.0555452	-0.0990672	0.441788	0.568035	no	no	no	no
YMR152W::chr13_4	YMR152W	YIM1	0.0551797	-0.541068	0.44209	0.90301	no	no	no	no
YDR445C::chr00_14	YDR445C	YDR445C	0.0545702	-0.331351	0.442594	0.777542	no	no	no	no
YJR099W::chr00_12	YJR099W	YUH1	0.0543403	-0.112985	0.442784	0.581948	no	no	no	no
YIR024C::chr00_3	YIR024C	YIR024C	0.0539452	0.235383	0.44311	0.247685	no	no	no	no
YMR285C::chr13_5	YMR285C	NGL2	0.0527124	-0.111275	0.444129	0.580243	no	no	no	no
YGL016W::chr7_1	YGL016W	KAP122	0.0524778	0.957758	0.444323	0.0057926	no	no	no	no
YGR084C::chr7_4	YGR084C	MRP13	0.0522084	-0.102317	0.444546	0.571293	no	no	no	no
YJL197W::chr10_1	YJL197W	UBP12	0.0521195	-0.00596688	0.44462	0.473641	no	no	no	no
YOR344C::chr15_4	YOR344C	TYE7	0.0518265	-0.045339	0.444862	0.513688	no	no	no	no
YER063W::chr00_10	YER063W	THO1	0.0517708	-0.0322098	0.444908	0.500329	no	no	no	no
YNL278W::chr14_1	YNL278W	CAF120	0.0516961	-0.0963357	0.44497	0.565295	no	no	no	no
YFL003C::chr00_17a	YFL003C	MSH4	0.0512303	-0.420863	0.445355	0.839465	no	no	no	no
YPR151C::chr00_18	YPR151C	SUE1	0.0508205	-0.431335	0.445694	0.845892	no	no	no	no
YMR153W::chr13_4	YMR153W	NUP53	0.0503433	0.150201	0.446089	0.321147	no	no	no	no
YDR462W::chr4_8	YDR462W	MRPL28	0.0503302	0.0198701	0.4461	0.447481	no	no	no	no
YGR107W::chr7_4	YGR107W	YGR107W	0.0502621	0.199163	0.446156	0.277798	no	no	no	no
YML038C::chr00_11	YML038C	YMD8	0.0502618	-0.080325	0.446156	0.54917	no	no	no	no
YJR026W::chr00_13	YJR026W	YJR026W	0.050004	-0.160986	0.446369	0.629045	no	no	no	no
YDR031W::chr4_3	YDR031W	MIC14	0.0498164	-0.371872	0.446525	0.807107	no	no	no	no
YOR175C::chr15_2	YOR175C	ALE1	0.0493238	-0.0615254	0.446932	0.530134	no	no	no	no
YDL053C::chr4_1	YDL053C	PBP4	0.0488432	-0.0870581	0.44733	0.555962	no	no	no	no
YDL188C::chr4_2	YDL188C	PPH22	0.0488226	-0.0894377	0.447347	0.558359	no	no	no	no
YDR153C::chr4_5	YDR153C	ENT5	0.0485872	0.0192818	0.447542	0.448074	no	no	no	no
YFL010C::chr00_17a	YFL010C	WWM1	0.047781	-0.0731825	0.448209	0.541949	no	no	no	no
YAR030C::chr1_1	YAR030C	YAR030C	0.0477774	-0.138433	0.448212	0.607111	no	no	no	no
YOL054W::chr15_5	YOL054W	PSH1	0.047527	-0.0863289	0.448419	0.555228	no	no	no	no
YDL006W::chr4_1	YDL006W	PTC1	0.0464319	-0.763558	0.449326	0.969011	no	no	no	no
YFR039C::chr00_14	YFR039C	YFR039C	0.0463627	0.00636658	0.449384	0.461132	no	no	no	no
YDR223W::chr4_5	YDR223W	CRF1	0.046329	-0.0302946	0.449411	0.49838	no	no	no	no
YGL121C::chr7_2	YGL121C	GPG1	0.0462559	0.0302758	0.449472	0.437003	no	no	no	no
YKL087C::chr11_1	YKL087C	CYT2	0.045935	0.274813	0.449738	0.216997	no	no	no	no
YKL001C::chr11_1	YKL001C	MET14	0.0453702	-0.112574	0.450206	0.581538	no	no	no	no
YHR081W::chr8_2	YHR081W	LRP1	0.0453332	1.15618	0.450236	0.00121995	no	yes	no	yes
YMR057C::chr00_5	YMR057C	YMR057C	0.0453195	-0.434546	0.450248	0.847828	no	no	no	no
YDR015C::chr4_3	YDR015C	YDR015C	0.0449833	-0.00743854	0.450526	0.475136	no	no	no	no
YIL130W::chr9_2	YIL130W	ASG1	0.0448443	-0.286916	0.450641	0.742337	no	no	no	no
YDR467C::chr4_8	YDR467C	YDR467C	0.044804	-0.361553	0.450675	0.799815	no	no	no	no
YCL036W::chr3_1	YCL036W	GFD2	0.0444403	-0.299037	0.450976	0.752219	no	no	no	no
YGL005C::chr7_1	YGL005C	COG7	0.0440778	0.223754	0.451276	0.25716	no	no	no	no
YKR017C::chr11_3	YKR017C	YKR017C	0.0440778	0.26028	0.451276	0.228045	no	no	no	no
YNL296W::chr14_1	YNL296W	YNL296W	0.043469	0.136303	0.451781	0.333946	no	no	no	no
YGL031C::chr7_1	YGL031C	RPL24A	0.0431227	0.957944	0.452068	0.00578478	no	no	no	no
YDR123C::chr4_4	YDR123C	INO2	0.0429643	-0.505339	0.452199	0.886429	no	no	no	no
YPL248C::chr16_1	YPL248C	GAL4	0.0428918	0.674158	0.452259	0.0358448	no	no	no	no
YLR265C::chr12_4	YLR265C	NEJ1	0.0423761	-0.138549	0.452687	0.607223	no	no	no	no
YDR155C::chr4_5	YDR155C	CPR1	0.0423047	-0.653497	0.452746	0.943596	no	no	no	no
YDR183W::chr4_5	YDR183W	PLP1	0.041754	-0.323287	0.453203	0.771365	no	no	no	no
YNL206C::chr14_2	YNL206C	RTT106	0.0416449	0.544754	0.453293	0.0706483	no	no	no	no
YFL055W::chr6_1	YFL055W	AGP3	0.0414284	0.00551849	0.453473	0.461991	no	no	no	no
YML100W-A::chr00_9	YML100W-A	YML100W-A	0.0411477	-0.130345	0.453706	0.599156	no	no	no	no
YBR292C::chr00_1	YBR292C	YBR292C	0.041073	-0.0767545	0.453767	0.545562	no	no	no	no
YKL077W::chr11_1	YKL077W	YKL077W	0.0410236	0.125153	0.453808	0.344357	no	yes	no	yes
YKL131W::chr11_2	YKL131W	YKL131W	0.0408255	0.301949	0.453973	0.197219	no	no	no	no
YKL151C::chr11_2	YKL151C	YKL151C	0.0407526	-0.184444	0.454033	0.651423	no	no	no	no
YEL059W::chr5_2	YEL059W	HHY1	0.0406603	-0.0645976	0.45411	0.533251	no	no	no	no
YIL050W::chr9_1	YIL050W	PCL7	0.0400941	-0.0958178	0.454579	0.564775	no	no	no	no
YPR078C::chr00_15	YPR078C	YPR078C	0.0398218	-0.341652	0.454805	0.785294	no	no	no	no
YML004C::chr13_2	YML004C	GLO1	0.0392084	0.119258	0.455314	0.349911	no	no	no	no
YMR181C::chr00_8	YMR181C	YMR181C	0.0389379	0.0239287	0.455539	0.443389	no	no	no	no
YPR122W::chr16_5	YPR122W	AXL1	0.0373506	-0.0949749	0.456856	0.563928	no	no	no	no
YKL183W::chr11_2	YKL183W	LOT5	0.0373186	-0.190171	0.456882	0.656812	no	no	no	no
YOR007C::chr15_1	YOR007C	SGT2	0.0366596	-0.0667771	0.457429	0.535461	no	no	no	no
YBR206W::chr2_4	YBR206W	YBR206W	0.0362777	0.0199964	0.457746	0.447354	no	no	no	no
YHR100C::chr8_2	YHR100C	GEP4	0.03603	0.292106	0.457952	0.204263	no	no	no	no
YKR046C::chr00_14	YKR046C	PET10	0.0355598	0.206817	0.458343	0.271289	no	no	no	no
YLR257W::chr12_4	YLR257W	YLR257W	0.0350018	-0.00707936	0.458806	0.474771	no	no	no	no
YNL318C::chr14_1	YNL318C	HXT14	0.0348763	-0.451473	0.45891	0.857768	no	no	no	no
YNL257C::chr14_1	YNL257C	SIP3	0.0346327	0.279207	0.459112	0.213719	no	no	no	no
YJR021C::chr00_13	YJR021C	REC107	0.0345417	-0.189601	0.459188	0.656277	no	no	no	no
YJR024C::chr00_13	YJR024C	MDE1	0.0343684	0.0841425	0.459332	0.383621	no	no	no	no
YJL145W::chr10_1	YJL145W	SFH5	0.0342873	0.0214023	0.459399	0.445936	no	no	no	no
YDL045W-A::chr4_1	YDL045W-A	MRP10	0.0342291	1.10461	0.459448	0.00187083	no	no	no	no
YJL038C::chr10_2	YJL038C	LOH1	0.0341074	-0.207966	0.459549	0.673346	no	no	no	no
YER111C::chr00_5	YER111C	SWI4	0.0338621	0.219025	0.459753	0.261066	no	no	no	no
YER069W::chr5_3	YER069W	ARG5,6	0.0331615	0.0971009	0.460335	0.371063	no	no	no	no
YKL156W::chr11_2	YKL156W	RPS27A	0.0321578	0.0558195	0.461168	0.411482	no	no	no	no
YBR182C::chr2_4	YBR182C	SMP1	0.0321578	-0.136176	0.461168	0.604894	no	no	no	no
YGR136W::chr7_5	YGR136W	LSB1	0.0320796	-0.127062	0.461233	0.595915	no	no	no	no
YDR360W::chr4_7	YDR360W	OPI7	0.031393	0.1516	0.461804	0.319869	no	no	no	no
YIR007W::chr9_2	YIR007W	YIR007W	0.0312376	-0.0156015	0.461933	0.483432	no	no	no	no
YMR056C::chr00_5	YMR056C	AAC1	0.030422	-0.0635403	0.462611	0.532179	no	no	no	no
YMR275C::chr13_5	YMR275C	BUL1	0.0301473	0.267902	0.462839	0.222212	no	no	no	no
YHR137W::chr8_2	YHR137W	ARO9	0.0296149	-0.11137	0.463282	0.580338	no	no	no	no
YNL175C::chr14_2	YNL175C	NOP13	0.029568	-0.47314	0.463321	0.869836	no	no	no	no
YPR199C::chr16_5	YPR199C	ARR1	0.0288521	-0.529702	0.463916	0.89794	no	no	no	no
YMR130W::chr00_9	YMR130W	YMR130W	0.0286881	0.0301289	0.464053	0.43715	no	no	no	no
YFR026C::chr6_1	YFR026C	ULI1	0.0284154	-0.26008	0.464279	0.719754	no	no	no	no
YML108W::chr00_9	YML108W	YML108W	0.0284154	0.463819	0.464279	0.103022	no	no	no	no
YPL127C::chr16_2	YPL127C	HHO1	0.0278095	0.130557	0.464783	0.339296	no	no	no	no
YIL024C::chr9_1	YIL024C	YIL024C	0.0276031	-0.536583	0.464955	0.901032	no	no	no	no
YJR097W::chr00_12	YJR097W	JJJ3	0.0270365	-0.0442999	0.465426	0.512631	yes	no	yes	no
YHL023C::chr8_1	YHL023C	NPR3	0.0268712	-0.0153932	0.465564	0.48322	no	no	no	no
YDR218C::chr4_5	YDR218C	SPR28	0.0267086	0.051721	0.465699	0.415555	no	no	no	no
YGR289C::chr00_17a	YGR289C	MAL11	0.0264563	-0.0698708	0.465909	0.538596	no	no	no	no
YPL203W::chr16_1	YPL203W	TPK2	0.0262186	-0.188434	0.466107	0.65518	no	no	no	no
YPR071W::chr16_4	YPR071W	YPR071W	0.0261384	-0.343087	0.466173	0.786361	no	no	no	no
YNL230C::chr14_2	YNL230C	ELA1	0.0258736	-0.261556	0.466394	0.72102	no	no	no	no
YNL279W::chr00_8	YNL279W	PRM1	0.0258099	-0.276338	0.466447	0.73355	no	no	no	no
YLR334C::chr00_11	YLR334C	YLR334C	0.0254713	-0.00445783	0.466728	0.472109	no	no	no	no
YJL191W::chr00_14	YJL191W	RPS14B	0.0251315	0.023734	0.467011	0.443585	no	no	no	no
YML111W::chr00_9	YML111W	BUL2	0.0244634	0.326078	0.467567	0.180582	no	no	no	no
YJL056C::chr10_2	YJL056C	ZAP1	0.0240862	0.0138707	0.467881	0.453539	no	no	no	no
YER181C::chr00_5	YER181C	YER181C	0.0237932	0.25455	0.468125	0.232485	no	no	no	no
YOR178C::chr15_2	YOR178C	GAC1	0.0237571	-0.177425	0.468155	0.644779	no	no	no	no
YJR126C::chr00_12	YJR126C	VPS70	0.0236393	-0.290964	0.468253	0.74566	no	no	no	no
YDL161W::chr4_2	YDL161W	ENT1	0.0234621	-0.0301755	0.4684	0.498259	no	no	no	no
YDL039C::chr4_1	YDL039C	PRM7	0.0232614	-0.0161852	0.468567	0.484025	no	no	no	no
YDL057W::chr4_1	YDL057W	YDL057W	0.0229433	-0.499239	0.468832	0.883407	no	no	no	no
YIL125W::chr9_2	YIL125W	KGD1	0.0228271	-0.225122	0.468929	0.68897	no	no	no	no
YJR092W::chr10_4	YJR092W	BUD4	0.0225325	0.0606585	0.469174	0.406686	no	no	no	no
YOL113W::chr00_6	YOL113W	SKM1	0.0225294	-0.0394518	0.469177	0.507699	no	no	no	no
YCL075W::chr00_12	YCL075W	YCL075W	0.0215209	0.0257706	0.470016	0.441534	no	no	no	no
YMR182C::chr13_4	YMR182C	RGM1	0.0210325	0.409105	0.470423	0.130306	no	no	no	no
YLR312W-A::chr12_4	YLR312W-A	MRPL15	0.0209976	0.364565	0.470452	0.15593	no	no	no	no
YPR015C::chr16_4	YPR015C	YPR015C	0.0209195	0.346725	0.470517	0.167067	no	no	no	no
YFR057W::chr00_2	YFR057W	YFR057W	0.0207349	-0.103768	0.470671	0.572745	no	no	no	no
YGL089C::chr7_1	YGL089C	MF(ALPHA)2	0.0202396	-0.261554	0.471083	0.721019	no	no	no	no
YFL012W::chr00_17a	YFL012W	YFL012W	0.0201418	0.197497	0.471164	0.279225	no	no	no	no
YHR136C::chr8_2	YHR136C	SPL2	0.0200538	-0.219411	0.471238	0.683805	no	no	no	no
YGL152C::chr7_2	YGL152C	YGL152C	0.0200481	0.184001	0.471243	0.290913	no	no	no	no
YIL041W::chr9_1	YIL041W	GVP36	0.0199623	-0.123561	0.471314	0.592452	no	no	no	no
YIL007C::chr9_1	YIL007C	NAS2	0.0199397	-0.208396	0.471333	0.673741	no	no	no	no
YPL042C::chr16_3	YPL042C	SSN3	0.0199215	1.11278	0.471348	0.0017502	no	no	no	no
YHR132C::chr8_2	YHR132C	ECM14	0.019741	0.0564589	0.471498	0.410848	no	no	no	no
YEL047C::chr5_2	YEL047C	YEL047C	0.0195298	-0.0165994	0.471674	0.484447	no	no	no	no
YCR043C::chr00_1	YCR043C	YCR043C	0.0192258	-0.186293	0.471927	0.653167	no	no	no	no
YHR115C::chr8_2	YHR115C	DMA1	0.0190603	-0.00783897	0.472065	0.475543	no	no	no	no
YBR131W::chr00_16a	YBR131W	CCZ1	0.0189779	-0.584059	0.472134	0.920518	no	no	no	no
YDR418W::chr4_7	YDR418W	RPL12B	0.0188343	0.877051	0.472253	0.0102069	no	no	no	no
YNL293W::chr14_1	YNL293W	MSB3	0.0185126	0.443808	0.472521	0.112475	no	no	no	no
YOR112W::chr15_2	YOR112W	CEX1	0.0182473	0.250763	0.472742	0.235447	no	no	no	no
YLL044W::chr00_8	YLL044W	YLL044W	0.0181967	0.0470392	0.472785	0.420218	no	no	no	no
YOL002C::chr15_5	YOL002C	IZH2	0.0179206	0.0699052	0.473015	0.397561	no	no	no	no
YKR064W::chr11_3	YKR064W	OAF3	0.0177238	0.0138018	0.473178	0.453609	no	no	no	no
YPL187W::chr16_2	YPL187W	MF(ALPHA)1	0.0176911	0.112356	0.473206	0.356453	no	no	no	no
YKL010C::chr11_1	YKL010C	UFD4	0.0172679	-0.0867766	0.473558	0.555679	no	no	no	no
YJL153C::chr10_1	YJL153C	INO1	0.0170401	-0.463137	0.473748	0.864355	no	no	no	no
YGL033W::chr7_1	YGL033W	HOP2	0.0169	0.0872698	0.473865	0.380579	no	no	no	no
YDR163W::chr4_5	YDR163W	CWC15	0.0163584	-0.14407	0.474316	0.612628	no	no	no	no
YPR039W::chr16_4	YPR039W	YPR039W	0.016279	-0.421479	0.474382	0.839847	no	no	no	no
YMR147W::chr13_4	YMR147W	YMR147W	0.0162552	-0.0878554	0.474402	0.556766	no	no	no	no
YNL089C::chr00_18	YNL089C	YNL089C	0.0157777	-0.222268	0.4748	0.686394	no	no	no	no
YIL076W::chr9_1	YIL076W	SEC28	0.0153516	-0.128558	0.475155	0.597393	no	no	no	no
YGL071W::chr7_1	YGL071W	AFT1	0.0152386	0.0673942	0.475249	0.400034	no	yes	no	yes
YIL045W::chr9_1	YIL045W	PIG2	0.0152266	-0.280133	0.475259	0.736719	no	no	no	no
YMR192W::chr13_4	YMR192W	GYL1	0.0149311	0.0554866	0.475505	0.411813	no	no	no	no
YGR054W::chr7_4	YGR054W	YGR054W	0.0146419	0.0970196	0.475746	0.371141	no	no	no	no
YLL039C::chr12_1	YLL039C	UBI4	0.0145445	-0.0935289	0.475827	0.562475	no	no	no	no
YML117W-A::chr00_9	YML116W-A	YML116W-A	0.0142834	-0.105118	0.476045	0.574095	no	no	no	no
YFR035C::chr00_2	YFR035C	YFR035C	0.0139008	0.240938	0.476364	0.243226	no	no	no	no
YCR067C::chr00_16a	YCR067C	SED4	0.013898	0.105098	0.476366	0.36338	no	no	no	no
YLR087C::chr12_2	YLR087C	CSF1	0.0138162	-0.382425	0.476434	0.814394	no	no	no	no
YKR104W::chr00_4	YKR104W	YKR104W	0.0133595	-0.123778	0.476815	0.592667	no	no	no	no
YLR016C::chr12_1	YLR016C	PML1	0.0126283	-0.00492349	0.477425	0.472582	no	no	no	no
YFL046W::chr6_1	YFL046W	FMP32	0.0119343	-0.0798626	0.478003	0.548703	no	no	no	no
YNR037C::chr14_4	YNR037C	RSM19	0.0116351	0.500801	0.478253	0.0870956	no	no	no	no
YPR057W::chr16_4	YPR057W	BRR1	0.0113741	0.403678	0.47847	0.133262	no	no	no	no
YMR120C::chr00_9	YMR120C	ADE17	0.0110012	-0.163785	0.478781	0.631741	no	no	no	no
YGL177W::chr7_2	YGL177W	YGL177W	0.0110012	-0.0251713	0.478781	0.493167	no	no	no	no
YBR207W::chr2_4	YBR207W	FTH1	0.0107147	0.0600929	0.47902	0.407246	no	no	no	no
YPR079W::chr16_4	YPR079W	MRL1	0.0104916	-0.178672	0.479206	0.645962	no	no	no	no
YGR015C::chr7_3	YGR015C	YGR015C	0.0102496	-0.194873	0.479408	0.661211	no	no	no	no
YOR202W::chr15_3	YOR202W	HIS3	0.0102484	-0.16276	0.479409	0.630754	no	no	no	no
YJR104C::chr00_12	YJR104C	SOD1	0.0097798	-0.44569	0.479799	0.854423	no	no	no	no
YDL085W::chr4_1	YDL085W	NDE2	0.00966965	-0.294369	0.479891	0.748437	no	no	no	no
YOR082C::chr15_1	YOR082C	YOR082C	0.00913382	-0.364155	0.480338	0.80167	no	no	no	no
YBR272C::chr00_16a	YBR272C	HSM3	0.00899644	-0.0883962	0.480453	0.55731	no	no	no	no
YDR436W::chr4_7	YDR436W	PPZ2	0.00887991	-0.375428	0.48055	0.809582	no	no	no	no
YGR109C::chr7_4	YGR109C	CLB6	0.00821363	-0.324347	0.481105	0.772182	no	no	no	no
YMR173W::chr00_11	YMR173W	DDR48	0.00815446	0.0877951	0.481155	0.380068	no	no	no	no
YNL197C::chr14_2	YNL197C	WHI3	0.00791225	0.155179	0.481357	0.316612	no	no	no	no
YNL202W::chr14_2	YNL202W	SPS19	0.00779636	-0.209958	0.481453	0.675176	no	no	no	no
YOR368W::chr15_4	YOR368W	RAD17	0.00747924	-0.0307412	0.481718	0.498835	no	no	no	no
YJL049W::chr10_2	YJL049W	YJL049W	0.00737539	-0.0626799	0.481805	0.531306	no	no	no	no
YKL070W::chr11_1	YKL070W	YKL070W	0.00728665	-0.19536	0.481879	0.661665	no	no	no	no
YLL030C::chr00_8	YLL030C	RRT7	0.00713639	0.0808382	0.482004	0.386844	no	no	no	no
YDL021W::chr4_1	YDL021W	GPM2	0.0069718	-0.0119931	0.482141	0.479764	no	no	no	no
YDR515W::chr00_17a	YDR515W	SLF1	0.00686375	-0.246731	0.482231	0.708174	no	no	no	no
YKL020C::chr11_1	YKL020C	SPT23	0.00674165	0.0773248	0.482333	0.390279	no	yes	no	yes
YDL054C::chr4_1	YDL054C	MCH1	0.00607398	-0.0689966	0.48289	0.53771	no	no	no	no
YDR104C::chr4_4	YDR104C	SPO71	0.00538536	0.385913	0.483465	0.143261	no	no	no	no
YKL072W::chr11_1	YKL072W	STB6	0.00490223	-0.159077	0.483868	0.627204	no	no	no	no
YJL083W::chr10_2	YJL083W	TAX4	0.00477663	0.243471	0.483972	0.241208	no	no	no	no
YBL100C::chr2_2	YBL100C	YBL100C	0.0045312	0.943981	0.484177	0.00639816	no	no	no	no
YJR052W::chr00_13	YJR052W	RAD7	0.00446506	-0.205576	0.484232	0.671144	no	no	no	no
YDR065W::chr4_4	YDR065W	RRG1	0.00428871	0.91854	0.484379	0.00766493	no	no	no	no
YJR150C::chr00_12	YJR150C	DAN1	0.00393159	-0.0834991	0.484677	0.552374	no	no	no	no
YOR292C::chr15_4	YOR292C	YOR292C	0.00383209	0.37748	0.48476	0.148179	no	no	no	no
YGR182C::chr7_5	YGR182C	YGR182C	0.00362849	0.249165	0.48493	0.236703	no	no	no	no
YJL106W::chr10_2	YJL106W	IME2	0.00325167	0.101578	0.485245	0.366755	no	no	no	no
YLR039C::chr00_8	YLR039C	RIC1	0.00324694	0.31272	0.485249	0.189681	no	no	no	no
YOR084W::chr15_1	YOR084W	LPX1	0.00308977	0.000669261	0.48538	0.466907	no	no	no	no
YKR061W::chr11_3	YKR061W	KTR2	0.00257217	-0.218067	0.485812	0.682584	no	no	no	no
YDR022C::chr4_3	YDR022C	CIS1	0.00253562	-0.219808	0.485842	0.684166	no	no	no	no
YOR237W::chr15_3	YOR237W	HES1	0.00243398	0.048265	0.485927	0.418996	no	no	no	no
YBR248C::chr2_4	YBR248C	HIS7	0.00219885	-0.231121	0.486123	0.694357	no	no	no	no
YKL190W::chr11_2	YKL190W	CNB1	0.0017263	-0.0746148	0.486517	0.543398	no	no	no	no
YDL189W::chr4_2	YDL189W	RBS1	0.000928937	0.0326122	0.487183	0.434656	no	no	no	no
YGL133W::chr7_2	YGL133W	ITC1	0.000616683	0.0515953	0.487443	0.41568	no	no	no	no
YDR133C::chr4_4	YDR133C	YDR133C	0.000509494	-0.153408	0.487533	0.621718	no	no	no	no
YIL135C::chr9_2	YIL135C	VHS2	0.000382421	-0.227235	0.487639	0.690873	no	no	no	no
YLR189C::chr12_3	YLR189C	ATG26	0.00019441	-0.178697	0.487796	0.645986	no	no	no	no
YDR057W::chr4_4	YDR057W	YOS9	-0.000158543	0.503918	0.48809	0.0858425	no	no	no	no
YPR128C::chr16_5	YPR128C	ANT1	-0.000187589	0.174668	0.488115	0.299128	no	no	no	no
YOR290C::chr15_4	YOR290C	SNF2	-0.000305029	0.0969385	0.488213	0.371219	no	yes	no	yes
YGL254W::chr7_3	YGL254W	FZF1	-0.000387439	-0.0695206	0.488281	0.538241	no	no	no	no
YNR005C::chr14_4	YNR005C	YNR005C	-0.000591244	0.16486	0.488451	0.307872	no	no	no	no
YPL147W::chr16_2	YPL147W	PXA1	-0.000846451	0.154849	0.488664	0.316912	no	no	no	no
YJL212C::chr10_1	YJL212C	OPT1	-0.000939042	-0.487046	0.488742	0.877197	no	no	no	no
YGR242W::chr00_2	YGR242W	YGR242W	-0.00142633	0.258157	0.489148	0.229684	no	no	no	no
YDR213W::chr4_5	YDR213W	UPC2	-0.00167139	-0.0185889	0.489353	0.48647	no	no	no	no
YDL202W::chr4_3	YDL202W	MRPL11	-0.00190238	0.247375	0.489546	0.238114	no	no	no	no
YLR261C::chr12_4	YLR261C	VPS63	-0.00193789	0.718504	0.489575	0.0277969	no	no	no	no
YGR228W::chr00_2	YGR228W	YGR228W	-0.00229216	-0.0102433	0.489871	0.477985	no	no	no	no
YDR474C::chr4_8	YDR475C	JIP4	-0.00233663	-0.355658	0.489908	0.795577	no	no	no	no
YHR126C::chr8_2	YHR126C	ANS1	-0.00236859	0.18057	0.489935	0.293921	no	no	no	no
YDR506C::chr00_17a	YDR506C	GMC1	-0.00275426	-0.0277073	0.490257	0.495747	no	no	no	no
YMR265C::chr13_5	YMR265C	YMR265C	-0.0030972	-0.234449	0.490543	0.697327	no	no	no	no
YHR086W::chr8_2	YHR086W	NAM8	-0.00351755	-0.362999	0.490894	0.800847	no	no	no	no
YBL068W::chr2_1	YBL068W	PRS4	-0.00410573	-0.576197	0.491385	0.917509	no	no	no	no
YPR191W::chr16_5	YPR191W	QCR2	-0.00428265	0.0167756	0.491532	0.450604	no	no	no	no
YCR085W::chr00_1	YCR085W	YCR085W	-0.00577455	-0.119391	0.492778	0.588318	no	no	no	no
YHR139C::chr8_2	YHR139C	SPS100	-0.00595159	-0.260197	0.492926	0.719854	no	no	no	no
YDL233W::chr4_3	YDL233W	YDL233W	-0.00627683	0.293909	0.493197	0.202962	no	no	no	no
YOL024W::chr15_5	YOL024W	YOL024W	-0.00633039	0.0272787	0.493242	0.440017	no	no	no	no
YOR193W::chr15_3	YOR193W	PEX27	-0.00705541	-0.0917816	0.493847	0.560718	no	no	no	no
YBR093C::chr2_3	YBR093C	PHO5	-0.00790016	0.112969	0.494552	0.355871	no	no	no	no
YCL011C::chr3_1	YCL011C	GBP2	-0.00837771	0.140948	0.494951	0.329645	no	no	no	no
YAL058C-A::chr00_12	YAL056C-A	YAL056C-A	-0.00846191	-0.299498	0.495021	0.75259	no	no	no	no
YGL104C::chr7_2	YGL104C	VPS73	-0.00880722	-0.00643986	0.49531	0.474122	no	no	no	no
[truncated: 2,035 more rows]

## Sheet: flight-ground 14G
Strain	ORF	Gene	Log2ratio	P	DropsOut	Significant
YLR228C::chr12_4	YLR228C	ECM22	2.83176	1.29e-09	no	yes
YDL192W::chr4_3	YDL192W	ARF1	1.70154	0.000164563	no	yes
YHR125W::chr8_2	YHR125W	YHR125W	1.65236	0.000243054	yes	yes
YPL106C::chr16_2	YPL106C	SSE1	1.60616	0.000347414	no	yes
YHR059W::chr00_10	YHR059W	FYV4	1.60192	0.000358835	no	yes
YJL119C::chr10_2	YJL119C	YJL119C	1.5077	0.000722363	no	yes
YOR027W::chr15_1	YOR027W	STI1	1.48423	0.000855047	yes	yes
YOR264W::chr15_3	YOR264W	DSE3	1.48367	0.000858467	yes	yes
YJL096W::chr10_2	YJL096W	MRPL49	1.36322	0.00196842	yes	yes
YJL129C::chr00_14	YJL129C	TRK1	1.25381	0.00397484	yes	yes
YBR191W::chr00_11	YBR191W	RPL21A	1.1775	0.00630657	yes	yes
YIL023C::chr9_1	YIL023C	YKE4	1.04736	0.0131372	yes	yes
YLR063W::chr12_2	YLR063W	YLR063W	1.02786	0.0145798	yes	yes
YLL043W::chr12_1	YLL043W	FPS1	0.905372	0.0271158	yes	yes
YDL172C::chr4_2	YDL172C	YDL172C	0.886994	0.0296125	yes	yes
YML086C::chr00_11	YML086C	ALO1	0.739234	0.0573651	yes	yes
YMR242C::chr13_5	YMR242C	RPL20A	0.555788	0.116364	yes	yes
YDL107W::chr4_2	YDL107W	MSS2	0.545697	0.12055	yes	yes
YOR369C::chr15_4	YOR369C	RPS12	0.496409	0.142514	yes	yes
YDL047W::chr4_1	YDL047W	SIT4	0.447081	0.167058	yes	yes
YLR370C::chr00_11	YLR370C	ARC18	0.39528	0.1956	yes	yes
YIL102C::chr9_2	YIL102C	YIL102C	0.382951	0.202805	yes	yes
YER058W::chr5_3	YER058W	PET117	0.356479	0.218804	yes	yes
YIL028W::chr9_1	YIL028W	YIL028W	0.355091	0.219662	yes	yes
YKR001C::chr11_3	YKR001C	VPS1	0.322113	0.240617	yes	yes
YGL132W::chr7_2	YGL132W	YGL132W	0.253807	0.287274	yes	yes
YMR175W::chr00_4	YMR175W	SIP18	0.245448	0.293265	yes	yes
YNL338W::chr14_1	YNL338W	YNL338W	0.227335	0.306441	yes	yes
YGR201C::chr00_10	YGR201C	YGR201C	0.201504	0.325669	yes	yes
YKL075C::chr11_1	YKL075C	YKL075C	0.15618	0.360528	yes	yes
YGL175C::chr7_2	YGL175C	SAE2	0.125153	0.3851	yes	yes
YDR241W::chr4_5	YDR241W	BUD26	0.109386	0.397773	yes	yes
YHR131C::chr00_10	YHR131C	YHR131C	0.106654	0.39998	yes	yes
YHR010W::chr8_1	YHR010W	RPL27A	0.0934445	0.410697	yes	yes
YDR459C::chr4_8	YDR459C	PFA5	0.0773248	0.423864	yes	yes
YDR152W::chr4_5	YDR152W	GIR2	0.0773097	0.423877	yes	yes
YFR045W::chr00_2	YFR045W	YFR045W	0.0773097	0.423877	yes	yes
YIL079C::chr9_1	YIL079C	AIR1	0.0673942	0.43202	yes	yes
YER134C::chr00_5	YER134C	YER134C	0.061023	0.437268	yes	yes
YDL125C::chr4_2	YDL125C	HNT1	0.061023	0.437268	yes	yes
YJR097W::chr00_12	YJR097W	JJJ3	0.0270365	0.465426	yes	yes

## Sheet: flight-ground 21G
Strain	ORF	Gene	Log2ratio	P	DropsOut	Significant
YNL067W::chr00_16b	YNL067W	RPL9B	2.6184	6.86e-12	yes	yes
YPL239W::chr16_1	YPL239W	YAR1	2.38921	3.29e-10	no	yes
YDL081C::chr4_1	YDL081C	RPP1A	2.23565	3.64e-09	no	yes
YDR159W::chr4_5	YDR159W	SAC3	2.08541	3.31e-08	yes	yes
YDR174W::chr00_14	YDR174W	HMO1	2.05922	4.8e-08	no	yes
YEL050C::chr5_2	YEL050C	RML2	2.0516	5.34e-08	no	yes
YLR264W::chr12_4	YLR264W	RPS28B	2.04732	5.67e-08	no	yes
YHR194W::chr00_10	YHR194W	MDM31	2.03842	6.42e-08	no	yes
YPR139C::chr16_5	YPR139C	LOA1	1.87567	5.69e-07	no	yes
YDL198C::chr4_3	YDL198C	GGC1	1.87305	5.89e-07	yes	yes
YOR141C::chr15_2	YOR141C	ARP8	1.83997	8.99e-07	no	yes
YDL035C::chr4_1	YDL035C	GPR1	1.80925	1.32e-06	no	yes
YDR495C::chr4_8	YDR495C	VPS3	1.76941	2.16e-06	no	yes
YHR041C::chr00_10	YHR041C	SRB2	1.74625	2.87e-06	yes	yes
YPL102C::chr16_2	YPL102C	YPL102C	1.74025	3.08e-06	no	yes
YJL063C::chr10_2	YJL063C	MRPL8	1.7185	4e-06	no	yes
YHR021C::chr8_1	YHR021C	RPS27B	1.68905	5.67e-06	yes	yes
YPL173W::chr16_2	YPL173W	MRPL40	1.66846	7.21e-06	no	yes
YDR417C::chr00_17a/chr00_18	YDR417C	YDR417C	1.65751	8.18e-06	no	yes
YPL180W::chr16_2	YPL180W	TCO89	1.62098	1.24e-05	no	yes
YFL036W::chr6_1	YFL036W	RPO41	1.576	2.05e-05	no	yes
YKR057W::chr11_3	YKR057W	RPS21A	1.56724	2.26e-05	no	yes
YLR192C::chr00_11	YLR192C	HCR1	1.55677	2.53e-05	no	yes
YHR066W::chr8_2	YHR066W	SSF1	1.54926	2.75e-05	yes	yes
YMR230W::chr13_4	YMR230W	RPS10B	1.52864	3.43e-05	no	yes
YDR519W::chr4_8	YDR519W	FPR2	1.51175	4.11e-05	no	yes
YDL083C::chr4_1	YDL083C	RPS16B	1.5088	4.24e-05	no	yes
YFR032C-A::chr00_2	YFR032C-A	RPL29	1.50286	4.52e-05	no	yes
YBR048W::chr2_2	YBR048W	RPS11B	1.48552	5.42e-05	no	yes
YIL008W::chr9_1	YIL008W	URM1	1.45874	7.16e-05	no	yes
YOR309C::chr15_4/chr00_12	YOR309C	YOR309C	1.4527	7.62e-05	no	yes
YMR267W::chr13_5	YMR267W	PPA2	1.4082	0.000119584	no	yes
YOR008C::chr15_1	YOR008C	SLG1	1.40721	0.000120766	no	yes
YLR402W::chr12_5	YLR402W	YLR402W	1.39146	0.00014123	no	yes
YDR024W::chr4_3	YDR024W	FYV1	1.37638	0.000163815	yes	yes
YLR185W::chr12_3	YLR185W	RPL37A	1.36136	0.000189634	no	yes
YOR106W::chr15_2	YOR106W	VAM3	1.35143	0.000208739	no	yes
YJL166W::chr10_1	YJL166W	QCR8	1.34611	0.000219709	no	yes
YGL066W::chr7_1	YGL066W	SGF73	1.32394	0.000271452	no	yes
YEL031W::chr5_2	YEL031W	SPF1	1.32019	0.000281255	no	yes
YPL118W::chr16_2	YPL118W	MRP51	1.31607	0.00029241	no	yes
YGR081C::chr7_4	YGR081C	SLX9	1.30623	0.000320701	no	yes
YKL121W::chr11_2	YKL121W	DGR2	1.30055	0.000338205	no	yes
YJL003W::chr00_13	YJL003W	COX16	1.27088	0.0004448	no	yes
YGR200C::chr7_5	YGR200C	ELP2	1.26473	0.000470499	no	yes
YPL157W::chr16_2	YPL157W	TGS1	1.25799	0.000500215	no	yes
YER095W::chr00_8	YER095W	RAD51	1.24933	0.000540936	no	yes
YLL006W::chr12_1	YLL006W	MMM1	1.24763	0.000549315	no	yes
YMR193C-A::chr13_4	YMR193C-A	YMR193C-A	1.22642	0.000663954	no	yes
YDL115C::chr4_2	YDL115C	IWR1	1.2184	0.000712786	yes	yes
YMR312W::chr00_8	YMR312W	ELP6	1.21072	0.000762632	no	yes
YML097C::chr00_9	YML097C	VPS9	1.19877	0.000846642	no	yes
YPL078C::chr00_17b	YPL078C	ATP4	1.19066	0.000908421	no	yes
YOR189W::chr15_2	YOR189W	IES4	1.18901	0.000921426	no	yes
YKL113C::chr11_2	YKL113C	RAD27	1.18355	0.000965882	no	yes
YGL163C::chr7_2	YGL163C	RAD54	1.18089	0.000988263	no	yes
YDL191W::chr4_3	YDL191W	RPL35A	1.16383	0.00114336	yes	yes
YLL033W::chr12_1	YLL033W	IRC19	1.07236	0.00242465	yes	yes
YPR164W::chr16_5	YPR164W	MMS1	1.0528	0.00282885	yes	yes
YML024W::chr13_2	YML024W	RPS17A	1.03622	0.00321815	yes	yes
YMR060C::chr00_4	YMR060C	SAM37	1.01677	0.00373574	yes	yes
YOR078W::chr15_1	YOR078W	BUD21	1.00643	0.0040403	yes	yes
YAR015W::chr1_1	YAR015W	ADE1	0.82076	0.0148129	yes	yes
YER017C::chr5_3	YER017C	AFG3	0.811045	0.0157667	yes	yes
YKL076C::chr11_1	YKL076C	PSY1	0.710116	0.0291915	yes	yes
YDL002C::chr4_1	YDL002C	NHP10	0.612819	0.0500251	yes	yes
YOR211C::chr15_3	YOR211C	MGM1	0.608584	0.0511495	yes	yes
YDR025W::chr4_3	YDR025W	RPS11A	0.573986	0.0611067	yes	yes
YBR189W::chr00_14	YBR189W	RPS9B	0.544106	0.070872	yes	yes
YDL173W::chr4_2	YDL173W	PAR32	0.532329	0.075035	yes	yes
YOL041C::chr15_5	YOL041C	NOP12	0.532329	0.075035	yes	yes
YOR369C::chr15_4	YOR369C	RPS12	0.496409	0.0888846	yes	yes
YGL124C::chr7_2	YGL124C	MON1	0.496409	0.0888846	yes	yes
YNL119W::chr00_16b	YNL119W	NCS2	0.459572	0.104978	yes	yes
YDL047W::chr4_1	YDL047W	SIT4	0.447081	0.110887	yes	yes
YLR139C::chr12_3	YLR139C	SLS1	0.434481	0.117086	yes	yes
YDR115W::chr4_4	YDR115W	YDR115W	0.426644	0.121063	yes	yes
YPR133W-A::chr00_18	YPR133W-A	TOM5	0.408946	0.130392	yes	yes
YLR252W::chr12_4	YLR252W	YLR252W	0.408946	0.130392	yes	yes
YBR061C::chr2_2	YBR061C	TRM7	0.396007	0.137519	yes	yes
YER058W::chr5_3	YER058W	PET117	0.356479	0.160916	yes	yes
YDL106C::chr4_2	YDL106C	PHO2	0.302031	0.197161	yes	yes
YDR393W::chr4_7	YDR393W	SHE9	0.274017	0.217594	yes	yes
YBR194W::chr2_4	YBR194W	AIM4	0.245448	0.239639	yes	yes
YPL161C::chr16_2	YPL161C	BEM4	0.230948	0.251277	yes	yes
YDL065C::chr4_1	YDL065C	PEX19	0.201504	0.275799	yes	yes
YKL075C::chr11_1	YKL075C	YKL075C	0.15618	0.315703	yes	yes
YJR070C::chr00_12	YJR070C	LIA1	0.144873	0.326029	yes	yes
YBL085W::chr2_1	YBL085W	BOI1	0.14075	0.329828	yes	yes
YKL077W::chr11_1	YKL077W	YKL077W	0.125153	0.344357	yes	yes
YMR310C::chr13_5	YMR310C	YMR310C	0.125153	0.344357	yes	yes
YDR386W::chr4_7	YDR386W	MUS81	0.109386	0.359282	yes	yes
YOR290C::chr15_4	YOR290C	SNF2	0.0969385	0.371219	yes	yes
YHR010W::chr8_1	YHR010W	RPL27A	0.0934445	0.374593	yes	yes
YNL273W::chr14_1	YNL273W	TOF1	0.0773248	0.390279	yes	yes

## Sheet: flight-ground processes 14G
GO process	Query set fraction	Process fraction	Fold enrichment	P	FDR	Overlap genes
CYTOPLASMIC TRANSLATION	0.121951	0.0431034	4.10849	0.00674348	1	RPL21A(1.18)|RPL20A(0.56)|RPS12(0.5)|RPL27A(0.09)|GIR2(0.08)

## Sheet: flight-ground processes 21G
GO process	Query set fraction	Process fraction	Fold enrichment	P	FDR	Overlap genes
RIBOSOMAL SMALL SUBUNIT BIOGENESIS	0.126316	0.3	12.3411	6.72e-11	1.02e-07	YAR1(2.39)|SAC3(2.09)|RPS27B(1.69)|RPS21A(1.57)|HCR1(1.56)|RPS16B(1.51)|RPS11B(1.49)|SLX9(1.31)|RPS17A(1.04)|BUD21(1.01)|RPS11A(0.57)|RPS9B(0.54)
CYTOPLASMIC TRANSLATION	0.189474	0.155172	6.3833	1.42e-10	1.08e-07	RPL9B(2.62)|RPP1A(2.24)|RML2(2.05)|RPS28B(2.05)|RPS27B(1.69)|RPS21A(1.57)|HCR1(1.56)|RPS10B(1.53)|RPS16B(1.51)|RPL29(1.5)|RPS11B(1.49)|RPL37A(1.36)|RPL35A(1.16)|RPS17A(1.04)|RPS11A(0.57)|RPS12(0.5)|TRM7(0.4)|RPL27A(0.09)
MATURATION OF SSU-RRNA FROM TRICISTRONIC RRNA TRANSCRIPT (SSU-RRNA, 5.8S RRNA, LSU-RRNA)	0.0947368	0.36	14.8093	3e-09	1.52e-06	RPS27B(1.69)|RPS21A(1.57)|HCR1(1.56)|RPS16B(1.51)|RPS11B(1.49)|SLX9(1.31)|BUD21(1.01)|RPS11A(0.57)|RPS9B(0.54)
MATURATION OF SSU-RRNA	0.0947368	0.310345	12.7666	1.36e-08	5.16e-06	RPS27B(1.69)|RPS21A(1.57)|HCR1(1.56)|RPS16B(1.51)|RPS11B(1.49)|SLX9(1.31)|BUD21(1.01)|RPS11A(0.57)|RPS9B(0.54)
PROTEIN URMYLATION	0.0421053	0.666667	27.4246	4.74e-06	0.00144076	URM1(1.46)|ELP2(1.26)|ELP6(1.21)|NCS2(0.46)
TRNA WOBBLE BASE MODIFICATION	0.0526316	0.294118	12.0991	3.75e-05	0.00712662	URM1(1.46)|ELP2(1.26)|ELP6(1.21)|NCS2(0.46)|SIT4(0.45)
TRNA WOBBLE URIDINE MODIFICATION	0.0526316	0.294118	12.0991	3.75e-05	0.00712662	URM1(1.46)|ELP2(1.26)|ELP6(1.21)|NCS2(0.46)|SIT4(0.45)
RIBOSOME ASSEMBLY	0.0526316	0.294118	12.0991	3.75e-05	0.00712662	RPS27B(1.69)|SSF1(1.55)|RPS11B(1.49)|RPS17A(1.04)|RPS11A(0.57)
RIBOSOMAL SMALL SUBUNIT ASSEMBLY	0.0421053	0.4	16.4547	6.15e-05	0.0103947	RPS27B(1.69)|RPS11B(1.49)|RPS17A(1.04)|RPS11A(0.57)
OUTER MITOCHONDRIAL MEMBRANE ORGANIZATION	0.0315789	0.6	24.6821	0.000134378	0.0204254	MMM1(1.25)|SAM37(1.02)|TOM5(0.41)
RNA MODIFICATION	0.0736842	0.137255	5.64623	0.000194108	0.0268222	URM1(1.46)|ELP2(1.26)|TGS1(1.26)|ELP6(1.21)|NCS2(0.46)|SIT4(0.45)|TRM7(0.4)
MITOTIC RECOMBINATION	0.0526316	0.208333	8.57018	0.000225085	0.0285107	ARP8(1.84)|RAD51(1.25)|RAD27(1.18)|RAD54(1.18)|IRC19(1.07)
MITOCHONDRIAL GENOME MAINTENANCE	0.0526316	0.185185	7.61793	0.000403514	0.0471801	GGC1(1.87)|MRPL8(1.72)|RPO41(1.58)|MMM1(1.25)|MGM1(0.61)
ORGANELLE ASSEMBLY	0.0526316	0.178571	7.34586	0.000481872	0.0523175	RPS27B(1.69)|SSF1(1.55)|RPS11B(1.49)|RPS17A(1.04)|RPS11A(0.57)
PROTEIN TARGETING TO MITOCHONDRION	0.0421053	0.222222	9.14152	0.000772129	0.0747069	MMM1(1.25)|SAM37(1.02)|AFG3(0.81)|TOM5(0.41)
NUCLEIC ACID PHOSPHODIESTER BOND HYDROLYSIS	0.0526316	0.16129	6.63497	0.000786388	0.0747069	RPS27B(1.69)|RPS21A(1.57)|RAD27(1.18)|BUD21(1.01)|MUS81(0.11)
TRNA MODIFICATION	0.0631579	0.12766	5.25151	0.000845741	0.0756192	URM1(1.46)|ELP2(1.26)|ELP6(1.21)|NCS2(0.46)|SIT4(0.45)|TRM7(0.4)
DNA REPAIR	0.105263	0.0775194	3.1889	0.00100757	0.0791197	SAC3(2.09)|RAD51(1.25)|RAD27(1.18)|RAD54(1.18)|MMS1(1.05)|NHP10(0.61)|SIT4(0.45)|MUS81(0.11)|SNF2(0.1)|TOF1(0.08)
ENDONUCLEOLYTIC CLEAVAGE INVOLVED IN RRNA PROCESSING	0.0315789	0.333333	13.7123	0.00105135	0.0791197	RPS27B(1.69)|RPS21A(1.57)|BUD21(1.01)
ENDONUCLEOLYTIC CLEAVAGE OF TRICISTRONIC RRNA TRANSCRIPT (SSU-RRNA, 5.8S RRNA, LSU-RRNA)	0.0315789	0.333333	13.7123	0.00105135	0.0791197	RPS27B(1.69)|RPS21A(1.57)|BUD21(1.01)
DNA RECOMBINATION	0.0842105	0.091954	3.7827	0.0010931	0.0791197	ARP8(1.84)|RAD51(1.25)|RAD27(1.18)|RAD54(1.18)|IRC19(1.07)|MMS1(1.05)|MUS81(0.11)|SNF2(0.1)
PROTEIN TARGETING	0.105263	0.0714286	2.93835	0.00188469	0.110502	SAC3(2.09)|LOA1(1.88)|VPS3(1.77)|MMM1(1.25)|VPS9(1.2)|SAM37(1.02)|AFG3(0.81)|MON1(0.5)|TOM5(0.41)|PEX19(0.2)
CHROMATIN REMODELING	0.0526316	0.131579	5.41274	0.00203114	0.110502	ARP8(1.84)|RAD54(1.18)|NHP10(0.61)|PHO2(0.3)|SNF2(0.1)
RIBONUCLEOPROTEIN COMPLEX ASSEMBLY	0.0526316	0.131579	5.41274	0.00203114	0.110502	RPS27B(1.69)|SSF1(1.55)|RPS11B(1.49)|RPS17A(1.04)|RPS11A(0.57)
ESTABLISHMENT OF PROTEIN LOCALIZATION TO ORGANELLE	0.0947368	0.0762712	3.13756	0.00203511	0.110502	LOA1(1.88)|VPS3(1.77)|MMM1(1.25)|VPS9(1.2)|SAM37(1.02)|AFG3(0.81)|MON1(0.5)|TOM5(0.41)|PEX19(0.2)
MITOCHONDRIAL MEMBRANE ORGANIZATION	0.0421053	0.173913	7.15423	0.00203556	0.110502	MMM1(1.25)|SAM37(1.02)|TOM5(0.41)|SHE9(0.27)
PROTEIN LOCALIZATION IN MITOCHONDRION	0.0421053	0.173913	7.15423	0.00203556	0.110502	MMM1(1.25)|SAM37(1.02)|AFG3(0.81)|TOM5(0.41)
ESTABLISHMENT OF PROTEIN LOCALIZATION IN MITOCHONDRION	0.0421053	0.173913	7.15423	0.00203556	0.110502	MMM1(1.25)|SAM37(1.02)|AFG3(0.81)|TOM5(0.41)
RIBONUCLEOPROTEIN COMPLEX SUBUNIT ORGANIZATION	0.0526316	0.128205	5.27395	0.00228564	0.119127	RPS27B(1.69)|SSF1(1.55)|RPS11B(1.49)|RPS17A(1.04)|RPS11A(0.57)
TRNA PROCESSING	0.0631579	0.105263	4.33019	0.00235119	0.119127	URM1(1.46)|ELP2(1.26)|ELP6(1.21)|NCS2(0.46)|SIT4(0.45)|TRM7(0.4)
CLEAVAGE INVOLVED IN RRNA PROCESSING	0.0315789	0.214286	8.81504	0.00417036	0.204482	RPS27B(1.69)|RPS21A(1.57)|BUD21(1.01)
MATURATION OF LSU-RRNA FROM TRICISTRONIC RRNA TRANSCRIPT (SSU-RRNA, 5.8S RRNA, LSU-RRNA)	0.0210526	0.4	16.4547	0.00557501	0.223	RPL35A(1.16)|NOP12(0.53)
MATURATION OF LSU-RRNA	0.0210526	0.4	16.4547	0.00557501	0.223	RPL35A(1.16)|NOP12(0.53)
TRNA THIO-MODIFICATION	0.0210526	0.4	16.4547	0.00557501	0.223	URM1(1.46)|NCS2(0.46)
MEMBRANE DOCKING	0.0210526	0.4	16.4547	0.00557501	0.223	VAM3(1.35)|MON1(0.5)
NUCLEOSOME MOBILIZATION	0.0210526	0.4	16.4547	0.00557501	0.223	NHP10(0.61)|SNF2(0.1)
VESICLE DOCKING	0.0210526	0.4	16.4547	0.00557501	0.223	VAM3(1.35)|MON1(0.5)
REGULATION OF RIBOSOMAL PROTEIN GENE TRANSCRIPTION FROM RNA POLYMERASE II PROMOTER	0.0210526	0.4	16.4547	0.00557501	0.223	HMO1(2.06)|SRB2(1.75)
MITOCHONDRIAL TRANSPORT	0.0421053	0.129032	5.30798	0.00623519	0.236937	MMM1(1.25)|SAM37(1.02)|AFG3(0.81)|TOM5(0.41)
ORGANELLE INHERITANCE	0.0421053	0.129032	5.30798	0.00623519	0.236937	MDM31(2.04)|VPS3(1.77)|VPS9(1.2)|PEX19(0.2)
TRNA METABOLIC PROCESS	0.0631579	0.0857143	3.52602	0.00659655	0.244555	URM1(1.46)|ELP2(1.26)|ELP6(1.21)|NCS2(0.46)|SIT4(0.45)|TRM7(0.4)
RHO PROTEIN SIGNAL TRANSDUCTION	0.0315789	0.176471	7.25944	0.00738998	0.267447	SLG1(1.41)|BEM4(0.23)|BOI1(0.14)
HETERODUPLEX FORMATION	0.0210526	0.333333	13.7123	0.0082305	0.284326	RAD51(1.25)|RAD54(1.18)
MAINTENANCE OF FIDELITY INVOLVED IN DNA-DEPENDENT DNA REPLICATION	0.0210526	0.333333	13.7123	0.0082305	0.284326	MMS1(1.05)|TOF1(0.08)
