# Supplementary material for: Genes Required for Survival in Microgravity Revealed by Genome-Wide Yeast Deletion Collections Cultured during Spaceflight
Source: Biomed Res Int. 2015 Jan 13;2015:976458. doi: 10.1155/2015/976458 (PMC4309212; doi:10.1155/2015/976458)
Supplement: Supplementary file 1 — Supplementary tables 1 and 2 provide the Illumina sequencing counts for each barcode/strain of each sample following mean normalization for the homozygous strains (Supplementary Table S1) and the heterozygous deletion strains (Supplementary Table S2). Supplementary tables 3 and 4 list those strains in the homozygous deletion collection (Supplementary Table S3) and the heterozygous deletion collection (Supplementary Table S4) that were excluded from the analysis for technical reasons. Supplementary tables 5 and 6 contain the results from the analysis of the homozygous deletion collection, comparing ground experiments to flight experiments in YPD media (Supplementary Table S5) and in YPD media + 0.5M NaCl (Supplementary Table S6). Supplementary table S7 contains the concordance in GO enrichments of the experiments presented in this study to a compendium of published data (reference 13). Supplementary tables 8 and 9 contain the results from the analysis of the heterozygous deletion collection, comparing ground experiments to flight experiments in YPD media (Supplementary Table S8) and in YPD media + 0.5M NaCl (Supplementary Table S9). [file 976458.f1.zip › TableS6_vsT1-hom1-NaCl-dropsToBg.xlsx]

## Sheet: README
Table S6. Genes associated with flight based on fitness defects at different time points, observed for homozygous deletion strains grown in NaCl.
ground and flight sheets
Assessment of whether or not each strain exhibited signficant fitness defects at later time points, in different conditions (see sheet name).
Column	Description
Strain	a strain in the pool
ORF	the ORF deleted from the strain
Gene	the gene name associated with the deleted ORF
Log2ratio, 14G/21G	log2(<abundance7G>/<abundance14G/21G>) where abundanceYG represents the abundance of the strain at Y generations; larger values indicate a greater reduction in strain abundance at the later time point
P, 14/21G	significance of the reduction in strain abundance at 14/21G vs. 7G (see Methods)
Drops out, 14/21G	yes, if the strain abundance at 7G is above the background level but drops below that level at 14/21G; no, otherwise (see Methods)
Significant, 14/21G	yes, if the fitness defect at 14/21G vs. 7G is significant; specifically, (log2ratio >= 1 & P <= 0.001) or the strain drops out; no, otherwise
flight-ground sheets
Strains that exhibited signfiicant fitness defects at 14/21 generations in the flight condition but not in the ground condition.
Columns are as described for the ground and flight sheets.
flight-ground processessheets
Gene Ontology (GO) biological processes enriched (P <= 0.01) amongst flight-associated genes at 14/21 generations (see flight-ground sheets).
Column	Description
GO process	enriched GO biological process
Query set fraction	fraction of the flight genes that are annotated to the process
Process fraction	fraction of the process genes that are associated with flight
Fold enrichment	fold enrichment = <query set fraction>/<fraction of the gene universe annotated to the process>
P	P value measuring the significance of enrichment (hypergeometric test)
FDR	false discovery rate, P corrected for multiple comparisons (see Methods)
Overlap genes	|-separated list of flight-associated genes that are annotated to the process (flight log2ratios are shown in parentheses)

## Sheet: ground
Strain	ORF	Gene	Log2ratio, 14G	Log2ratio, 21G	P, 14G	P, 21G	Drops out, 14G	Drops out, 21G	Significant, 14G	Significant, 21G
YAL002W::chr1_1	YAL002W	VPS8	1.08524	-1.0148	0.0754728	0.884407	no	no	no	no
YAL004W::chr1_1	YAL004W	YAL004W	0.922251	2.00786	0.115892	0.00315607	no	no	no	no
YAL005C::chr1_1	YAL005C	SSA1	0.0105773	0.608062	0.559228	0.180923	no	no	no	no
YAL007C::chr1_1	YAL007C	ERP2	0.0165275	-0.902277	0.555763	0.853386	no	no	no	no
YAL008W::chr1_1	YAL008W	FUN14	0.648085	-0.209181	0.214367	0.559729	no	no	no	no
YAL009W::chr1_1	YAL009W	SPO7	-0.33913	2.12022	0.74693	0.00200652	no	no	no	no
YAL011W::chr1_1	YAL011W	SWC3	0.269344	-1.32038	0.408002	0.944583	no	no	no	no
YAL012W::chr00_12	YAL012W	CYS3	0.334638	0.747174	0.371077	0.137274	no	no	no	no
YAL013W::chr1_1	YAL013W	DEP1	0.0662421	2.15954	0.526671	0.00170446	no	no	no	no
YAL014C::chr1_1	YAL014C	SYN8	0.0782495	-0.577393	0.519617	0.73527	no	no	no	no
YAL015C::chr1_1	YAL015C	NTG1	0.198887	-0.242056	0.448775	0.576523	no	no	no	no
YAL017W::chr1_1	YAL017W	PSK1	-0.139419	-0.1062	0.644409	0.506559	no	no	no	no
YAL018C::chr1_1	YAL018C	YAL018C	-0.501912	-0.798698	0.817261	0.820284	no	no	no	no
YAL019W::chr1_1	YAL019W	FUN30	-0.0227714	-0.315295	0.578558	0.6134	no	no	no	no
YAL020C::chr1_1	YAL020C	ATS1	-0.103034	-0.514573	0.624226	0.707874	no	no	no	no
YAL022C::chr1_1	YAL022C	FUN26	-0.0627147	-0.889089	0.601459	0.849415	no	no	no	no
YAL023C::chr1_1	YAL023C	PMT2	-0.133867	1.33023	0.641354	0.0321262	no	no	no	no
YAL026C::chr1_1	YAL026C	DRS2	-0.359597	1.05742	0.756488	0.0673451	no	no	no	no
YAL027W::chr1_1	YAL027W	SAW1	-0.562623	-0.927156	0.840017	0.860685	no	no	no	no
YAL028W::chr1_1	YAL028W	FRT2	-0.912521	-0.694492	0.934562	0.782604	no	no	no	no
YAL029C::chr1_1	YAL029C	MYO4	-0.412963	-0.432996	0.780466	0.670453	no	no	no	no
YAL030W::chr1_1	YAL030W	SNC1	0.37349	-0.216205	0.349633	0.563327	no	no	no	no
YAL031C::chr1_1	YAL031C	GIP4	-0.0659372	0.25315	0.603292	0.326142	no	no	no	no
YAL034C::chr1_1	YAL034C	FUN19	1.18561	0.34471	0.0565681	0.284479	no	no	no	no
YAL036C::chr1_1	YAL036C	RBG1	0.261811	-0.311702	0.412322	0.611612	no	no	no	no
YAL037W::chr1_1	YAL037W	YAL037W	-0.00267276	0.0914918	0.566928	0.404975	no	no	no	no
YAL042W::chr1_1	YAL042W	ERV46	0.300537	0.0724236	0.390238	0.414608	no	no	no	no
YAL043C-A::chr1_1	YAL042C-A	YAL042C-A	0.446742	0.441632	0.310525	0.243355	no	no	no	no
YAL044C::chr1_1	YAL044C	GCV3	0.122937	1.78648	0.493328	0.0072749	no	no	no	no
YAL045C::chr1_1	YAL045C	YAL045C	0.362106	0.0645325	0.355871	0.418609	no	no	no	no
YAL046C::chr1_1	YAL046C	AIM1	-0.0532132	-0.00812199	0.59604	0.455798	no	no	no	no
YAL048C::chr1_1	YAL048C	GEM1	0.724853	0.322236	0.182839	0.294468	no	no	no	no
YAL049C::chr1_1	YAL049C	AIM2	-0.285581	-0.758912	0.721018	0.80641	no	no	no	no
YAL051W::chr1_1	YAL051W	OAF1	-0.272417	-1.15406	0.714457	0.915945	no	no	no	no
YAL053W::chr1_1	YAL053W	FLC2	0.833363	1.24293	0.143515	0.041197	no	no	no	no
YAL055W::chr1_1	YAL055W	PEX22	0.654751	0.900695	0.21151	0.0981482	no	no	no	no
YAL056W::chr1_1	YAL056W	GPB2	2.21662	1.33562	0.000951168	0.031625	no	no	yes	no
YAL058W::chr1_1	YAL058W	CNE1	-0.54889	0.288157	0.835039	0.309916	no	no	no	no
YAL059W::chr1_1	YAL059W	ECM1	0.465687	-0.0775304	0.300728	0.491695	no	no	no	no
YAL060W::chr1_1	YAL060W	BDH1	-0.250014	-0.540492	0.703123	0.719336	no	no	no	no
YAL061W::chr1_1	YAL061W	BDH2	-0.0992534	0.000275809	0.622108	0.451473	no	no	no	no
YAL062W::chr1_1	YAL062W	GDH3	-0.339448	-0.666906	0.74708	0.771914	no	no	no	no
YAL064C-A::chr00_1	YAL064C-A	TDA8	-0.651233	-0.888961	0.869755	0.849376	no	no	no	no
YAL065C::chr1_1	YAL065C	YAL065C	0.532826	0.435646	0.267187	0.245798	no	no	no	no
YAL066W::chr1_1	YAL066W	YAL066W	-0.210376	-0.548434	0.682584	0.722804	no	no	no	no
YAL067C::chr1_1	YAL067C	SEO1	1.15626	0.491307	0.061664	0.223594	no	no	no	no
YAL068C::chr1_1	YAL068C	PAU8	0.169606	-0.244232	0.465906	0.57763	no	no	no	no
YAR002C-A::chr00_16a	YAR002C-A	ERP1	0.626688	-0.61217	0.223688	0.749853	no	no	no	no
YAR002W::chr1_1	YAR002W	NUP60	1.03552	1.29839	0.0864646	0.035222	no	no	no	no
YAR003W::chr1_1	YAR003W	SWD1	0.0607412	0.0469253	0.5299	0.427568	no	no	no	no
YAR014C::chr1_1	YAR014C	BUD14	0.286223	0.940152	0.398364	0.0895623	no	no	no	no
YAR015W::chr1_1	YAR015W	ADE1	0.95513	1.98705	0.106699	0.00342483	no	yes	no	yes
YAR018C::chr1_1	YAR018C	KIN3	1.4785	1.98038	0.0218851	0.00351523	no	no	no	no
YAR020C::chr1_1	YAR020C	PAU7	1.61934	0.760423	0.0130732	0.133528	no	no	no	no
YAR023C::chr1_1	YAR023C	YAR023C	-0.810563	-0.716967	0.913126	0.791095	no	no	no	no
YAR027W::chr1_1	YAR027W	UIP3	0.457304	-0.0745295	0.305046	0.490139	no	no	no	no
YAR028W::chr1_1	YAR028W	YAR028W	0.441603	0.309515	0.313206	0.300193	no	no	no	no
YAR029W::chr1_1	YAR029W	YAR029W	-0.395339	-0.553978	0.772701	0.725213	no	no	no	no
YAR030C::chr1_1	YAR030C	YAR030C	-0.206685	-0.656636	0.680641	0.76786	no	no	no	no
YAR031W::chr1_1	YAR031W	PRM9	0.886285	-0.0347206	0.126577	0.469528	no	no	no	no
YAR035W::chr1_1	YAR035W	YAT1	0.591491	0.21552	0.23951	0.343958	no	no	no	no
YAR037W::chr1_1	not found	YAR037W	0.615445	-0.498454	0.228676	0.700638	no	no	no	no
YAR040C::chr1_1	not found	YAR040C	-0.313585	-0.797875	0.734728	0.820004	no	no	no	no
YAR042W::chr1_1	YAR042W	SWH1	0.573738	0.6721	0.247717	0.159849	no	no	no	no
YAR043C::chr1_1	deleted	YAR043C	0.874522	0.99106	0.130216	0.0793262	no	no	no	no
YAR047C::chr1_1	YAR047C	YAR047C	0.16964	-0.51157	0.465886	0.706532	no	no	no	no
YAR050W::chr00_12	YAR050W	FLO1	0.828798	0.928786	0.145045	0.0919762	no	yes	no	yes
YBL001C::chr2_1	YBL001C	ECM15	-0.268615	-0.924291	0.712548	0.859857	no	no	no	no
YBL002W::chr2_1	YBL002W	HTB2	1.07312	-0.123996	0.0780498	0.515782	no	no	no	no
YBL005W::chr2_1	YBL005W	PDR3	-0.182273	-0.237135	0.667668	0.574018	no	no	no	no
YBL006C::chr2_1	YBL006C	LDB7	1.77191	0.876876	0.00716102	0.103615	yes	no	yes	no
YBL009W::chr2_1	YBL009W	ALK2	0.286047	-0.397299	0.398463	0.653494	no	no	no	no
YBL010C::chr2_1	YBL010C	YBL010C	0.904366	-0.365715	0.121122	0.638226	no	no	no	no
YBL011W::chr2_1	YBL011W	SCT1	0.576667	0.0665683	0.246352	0.417576	no	no	no	no
YBL013W::chr2_1	YBL013W	FMT1	-0.387556	-0.0952901	0.769223	0.500902	no	no	no	no
YBL015W::chr2_1	YBL015W	ACH1	-0.258273	-1.70521	0.707326	0.981897	no	no	no	no
YBL017C::chr2_1	YBL017C	PEP1	0.319407	-0.48681	0.379599	0.69536	no	no	no	no
YBL019W::chr2_1	YBL019W	APN2	0.352134	0.481286	0.361366	0.227505	no	no	no	no
YBL021C::chr2_1	YBL021C	HAP3	0.0813379	0.962806	0.517801	0.0848921	no	yes	no	yes
YBL022C::chr2_1	YBL022C	PIM1	0.861523	0.446692	0.134321	0.2413	yes	no	yes	no
YBL024W::chr2_1	YBL024W	NCL1	0.570694	0.339744	0.249139	0.286672	no	no	no	no
YBL027W::chr2_1	YBL027W	RPL19B	-0.641989	1.62126	0.866845	0.0129183	no	yes	no	yes
YBL028C::chr2_1	YBL028C	YBL028C	1.08527	-0.426215	0.0754671	0.667257	no	no	no	no
YBL029W::chr2_1	YBL029W	YBL029W	-0.528065	-0.12298	0.827301	0.515256	no	no	no	no
YBL031W::chr2_1	YBL031W	SHE1	0.20089	-0.244864	0.447606	0.577952	no	no	no	no
YBL036C::chr2_1	YBL036C	YBL036C	0.479806	-0.486427	0.293518	0.695186	no	no	no	no
YBL037W::chr2_1	YBL037W	APL3	0.0906389	0.0537089	0.512332	0.424112	no	no	no	no
YBL039C::chr2_1	YBL039C	URA7	0.985463	0.90141	0.0986959	0.0979875	no	no	no	no
YBL043W::chr2_1	YBL043W	ECM13	0.545006	0.343948	0.261311	0.284815	no	no	no	no
YBL044W::chr2_1	YBL044W	YBL044W	0.390561	0.272765	0.340356	0.317008	no	no	no	no
YBL048W::chr2_1	YBL048W	RRT1	-0.0875265	-0.574738	0.615516	0.734139	no	no	no	no
YBL049W::chr2_1	YBL049W	MOH1	0.356296	-0.225447	0.359069	0.568054	no	no	no	no
YBL051C::chr2_1	YBL051C	PIN4	0.864798	0.252309	0.133278	0.326537	yes	no	yes	no
YBL053W::chr2_1	YBL053W	YBL053W	0.025342	-0.629139	0.550622	0.756811	no	no	no	no
YBL054W::chr2_1	YBL054W	TOD6	-0.498522	-1.09881	0.815933	0.904307	no	no	no	no
YBL055C::chr2_1	YBL055C	YBL055C	1.12729	0.299246	0.0670381	0.304851	yes	no	yes	no
YBL056W::chr2_1	YBL056W	PTC3	0.412159	0.159935	0.328756	0.37091	no	no	no	no
YBL057C::chr2_1	YBL057C	PTH2	0.0992321	0.0672849	0.507277	0.417213	no	no	no	no
YBL059W::chr2_1	YBL059W	YBL059W	0.138177	-0.190135	0.484363	0.549947	no	no	no	no
YBL060W::chr2_1	YBL060W	YEL1	0.502228	0.241431	0.282237	0.331651	yes	no	yes	no
YBL061C::chr2_1	YBL061C	SKT5	0.262559	-0.567268	0.411893	0.730944	no	no	no	no
YBL062W::chr2_1	YBL062W	YBL062W	0.0870806	0.505206	0.514425	0.218233	no	no	no	no
YBL063W::chr2_1	YBL063W	KIP1	-0.42324	-0.508952	0.784923	0.70536	no	no	no	no
YBL065W::chr2_1	YBL065W	YBL065W	1.09418	-0.0325604	0.0736145	0.468411	yes	no	yes	no
YBL066C::chr2_1	YBL066C	SEF1	0.794392	-0.230115	0.156925	0.570438	no	no	no	no
YBL067C::chr2_1	YBL067C	UBP13	0.319384	-0.249298	0.379612	0.580206	no	no	no	no
YBL068W::chr2_1	YBL068W	PRS4	1.00434	0.226634	0.0939431	0.338658	no	no	no	no
YBL069W::chr2_1	YBL069W	AST1	0.743476	0.403752	0.17565	0.259036	no	no	no	no
YBL070C::chr2_1	YBL070C	YBL070C	-0.526415	-0.373539	0.826678	0.64203	no	no	no	no
YBL071C::chr2_1	YBL071C	YBL071C	-0.0255731	0.75919	0.580174	0.133873	no	no	no	no
YBL075C::chr2_1	YBL075C	SSA3	0.108266	-0.252222	0.501961	0.58169	no	no	no	no
YBL078C::chr2_1	YBL078C	ATG8	0.667505	0.377469	0.206106	0.270215	no	no	no	no
YBL079W::chr2_1	YBL079W	NUP170	1.05384	2.95631	0.0822832	3.68879e-05	no	no	no	yes
YBL081W::chr2_1	YBL081W	YBL081W	0.893944	0.612969	0.124246	0.179249	yes	no	yes	no
YBL082C::chr2_1	YBL082C	ALG3	-0.88013	0.260391	0.928249	0.322758	no	no	no	no
YBL083C::chr2_1	YBL083C	YBL083C	0.300383	0.715876	0.390325	0.146406	no	no	no	no
YBL085W::chr2_1	YBL085W	BOI1	0.619674	0.249949	0.226793	0.327644	no	no	no	no
YBL086C::chr2_1	YBL086C	YBL086C	-0.10627	-1.22634	0.626036	0.929522	no	no	no	no
YBL087C::chr2_1	YBL087C	RPL23A	0.123875	1.77149	0.492776	0.00767715	no	no	no	no
YBL088C::chr2_1	YBL088C	TEL1	-0.800423	-0.841853	0.910736	0.834608	no	no	no	no
YBL089W::chr2_1	YBL089W	AVT5	0.106997	1.44195	0.502707	0.0229877	no	no	no	no
YBL091C-A::chr00_1	YBL091C-A	SCS22	0.863605	0.194702	0.133657	0.353969	no	no	no	no
YBL091C::chr2_1	YBL091C	MAP2	-0.159796	0.108084	0.655542	0.39664	no	no	no	no
YBL094C::chr2_1	YBL094C	YBL094C	0.0639276	-0.0837722	0.528029	0.494931	no	no	no	no
YBL095W::chr2_2	YBL095W	YBL095W	1.0488	0.278374	0.0834185	0.314416	no	no	no	no
YBL096C::chr2_2	YBL096C	YBL096C	0.254414	-0.0586982	0.416574	0.481936	no	no	no	no
YBL098W::chr2_2	YBL098W	BNA4	0.446787	-0.38426	0.310501	0.647219	no	no	no	no
YBL099W::chr2_2	YBL099W	ATP1	1.01076	3.99305	0.0923647	5.44609e-08	no	yes	no	yes
YBL100C::chr2_2	YBL100C	YBL100C	0.295628	3.2886	0.393019	5.52276e-06	no	no	no	yes
YBL102W::chr2_2	YBL102W	SFT2	0.268856	-0.572218	0.408282	0.733063	no	no	no	no
YBL103C::chr2_2	YBL103C	RTG3	-0.126888	-0.874857	0.6375	0.845049	no	no	no	no
YBL104C::chr2_2	YBL104C	SEA4	-0.307609	0.314036	0.731832	0.298153	no	no	no	no
YBL106C::chr2_2	YBL106C	SRO77	0.860095	1.05444	0.134777	0.0678506	no	no	no	no
YBL107C::chr2_2	YBL107C	YBL107C	0.806527	0.264756	0.152664	0.320724	no	no	no	no
YBR003W::chr2_2	YBR003W	COQ1	-0.231863	0.832648	0.693793	0.114346	no	no	no	no
YBR005W::chr2_2	YBR005W	RCR1	0.926548	-0.119935	0.11466	0.513678	no	no	no	no
YBR006W::chr2_2	YBR006W	UGA2	0.0549468	-1.39606	0.533299	0.954754	no	no	no	no
YBR007C::chr2_2	YBR007C	DSF2	0.498114	0.256058	0.284291	0.324782	no	no	no	no
YBR008C::chr2_2	YBR008C	FLR1	0.205729	0.0679686	0.444784	0.416866	no	no	no	no
YBR009C::chr2_2	YBR009C	HHF1	0.424893	-0.438446	0.321992	0.673012	no	no	no	no
YBR010W::chr2_2	YBR010W	HHT1	-0.754347	-1.32911	0.899258	0.945841	no	no	no	no
YBR012C::chr2_2	YBR012C	YBR012C	0.224115	-0.10936	0.43409	0.508197	no	no	no	no
YBR013C::chr2_2	YBR013C	YBR013C	0.899879	0.606947	0.12246	0.181305	no	no	no	no
YBR014C::chr2_2	YBR014C	GRX7	-0.047862	-0.32569	0.592979	0.61856	no	no	no	no
YBR015C::chr2_2	YBR015C	MNN2	0.769301	3.86929	0.165982	1.30019e-07	no	yes	no	yes
YBR016W::chr2_2	YBR016W	YBR016W	-0.331477	-0.189327	0.743305	0.549531	no	no	no	no
YBR018C::chr2_2	YBR018C	GAL7	0.906221	-0.357781	0.120572	0.634355	no	no	no	no
YBR019C::chr2_2	YBR019C	GAL10	0.574186	-0.0424799	0.247508	0.47354	no	no	no	no
YBR020W::chr00_18	YBR020W	GAL1	0.75612	0.0661312	0.170873	0.417798	yes	no	yes	no
YBR020W::chr2_2	YBR020W	GAL1	0.626081	0.112144	0.223955	0.394607	no	no	no	no
YBR021W::chr2_2	YBR021W	FUR4	1.18081	-0.783742	0.0573782	0.815144	no	no	no	no
YBR022W::chr2_2	YBR022W	POA1	0.181839	-0.618731	0.458739	0.752556	no	no	no	no
YBR023C::chr2_2	YBR023C	CHS3	-0.794158	-1.00429	0.909235	0.881725	no	no	no	no
YBR024W::chr2_2	YBR024W	SCO2	0.723921	0.30907	0.183204	0.300395	no	no	no	no
YBR025C::chr2_2	YBR025C	OLA1	1.12007	1.17448	0.068431	0.0496756	no	no	no	no
YBR026C::chr2_2	YBR026C	ETR1	0.213954	1.5977	0.439995	0.013973	no	no	no	no
YBR027C::chr2_2	YBR027C	YBR027C	0.652683	-0.678395	0.212394	0.776402	no	no	no	no
YBR028C::chr2_2	YBR028C	YPK3	-0.93501	-0.312047	0.938685	0.611784	no	no	no	no
YBR030W::chr2_2	YBR030W	RKM3	0.490994	-0.353147	0.287863	0.632087	no	no	no	no
YBR031W::chr2_2	YBR031W	RPL4A	0.862581	0.68195	0.133983	0.156755	no	no	no	no
YBR032W::chr2_2	YBR032W	YBR032W	0.679902	-0.183135	0.200933	0.546344	no	no	no	no
YBR033W::chr2_2	YBR033W	EDS1	0.315832	-0.467227	0.381607	0.686393	no	no	no	no
YBR034C::chr2_2	YBR034C	HMT1	0.548543	0.319309	0.259616	0.295781	no	no	no	no
YBR035C::chr2_2	YBR035C	PDX3	1.08728	3.00126	0.0750451	2.88304e-05	no	yes	no	yes
YBR037C::chr2_2	YBR037C	SCO1	0.759827	2.48199	0.169489	0.000407994	no	no	no	yes
YBR040W::chr2_2	YBR040W	FIG1	0.116632	0.0832152	0.497038	0.40915	no	no	no	no
YBR041W::chr2_2	YBR041W	FAT1	0.860952	1.19086	0.134503	0.0475295	no	no	no	no
YBR042C::chr2_2	YBR042C	CST26	-0.904913	0.365915	0.933119	0.275205	no	no	no	no
YBR043C::chr2_2	YBR043C	QDR3	0.120683	-0.351037	0.494654	0.631053	no	no	no	no
YBR045C::chr2_2	YBR045C	GIP1	-0.232112	-0.823967	0.693922	0.828764	no	no	no	no
YBR046C::chr2_2	YBR046C	ZTA1	-0.267267	-0.67115	0.71187	0.773578	no	no	no	no
YBR047W::chr2_2	YBR047W	FMP23	-0.765783	-1.06533	0.902202	0.896703	no	no	no	no
YBR048W::chr2_2	YBR048W	RPS11B	0.936236	2.48037	0.111916	0.000411105	no	no	no	yes
YBR050C::chr2_2	YBR050C	REG2	0.974305	0.389813	0.101587	0.264935	no	no	no	no
YBR051W::chr2_2	YBR051W	YBR051W	0.98431	0.529318	0.0989918	0.20911	no	no	no	no
YBR052C::chr2_2	YBR052C	RFS1	0.768878	0.343327	0.166138	0.285089	no	no	no	no
YBR053C::chr2_2	YBR053C	YBR053C	1.02156	0.797502	0.0897543	0.12342	no	no	no	no
YBR054W::chr2_2	YBR054W	YRO2	0.221353	-0.809424	0.435694	0.823916	no	no	no	no
YBR056W::chr2_2	YBR056W	YBR056W	-1.89686	-0.211187	0.998475	0.560757	no	no	no	no
YBR057C::chr2_2	YBR057C	MUM2	0.252745	-0.284074	0.417535	0.597784	no	no	no	no
YBR058C::chr2_2	YBR058C	UBP14	0.867258	-0.643633	0.132499	0.76267	no	no	no	no
YBR059C::chr2_2	YBR059C	AKL1	0.47406	1.4509	0.296443	0.0223615	no	no	no	no
YBR061C::chr2_2	YBR061C	TRM7	-0.282153	1.01602	0.719317	0.0746435	no	no	no	no
YBR062C::chr2_2	YBR062C	YBR062C	0.745241	0.469217	0.174978	0.232267	no	no	no	no
YBR063C::chr2_2	YBR063C	YBR063C	-0.518215	-0.366236	0.823561	0.63848	no	no	no	no
YBR064W::chr2_2	YBR064W	YBR064W	0.413155	0.0583803	0.328225	0.421735	no	no	no	no
YBR065C::chr2_2	YBR065C	ECM2	-0.122702	-0.537406	0.635182	0.717983	no	no	no	no
YBR066C::chr2_2	YBR066C	NRG2	0.776343	0.90812	0.163407	0.0964882	no	no	no	no
YBR067C::chr2_2	YBR067C	TIP1	0.844373	0.118165	0.139871	0.391598	no	no	no	no
YBR068C::chr2_2	YBR068C	BAP2	-0.0588522	1.2862	0.599258	0.036471	no	no	no	no
YBR069C::chr2_2	YBR069C	TAT1	0.635836	0.364539	0.219675	0.275802	no	no	no	no
YBR071W::chr2_2	YBR071W	YBR071W	1.10969	0.128173	0.0704747	0.386611	no	no	no	no
YBR072W::chr2_2	YBR072W	HSP26	0.29859	-0.297912	0.39134	0.604727	no	no	no	no
YBR073W::chr2_2	YBR073W	RDH54	0.90582	-0.0515606	0.120691	0.47824	no	no	no	no
YBR074W::chr2_2	YBR074W	YBR074W	0.396963	-0.296681	0.336901	0.60411	no	no	no	no
YBR075W::chr2_2	YBR074W	YBR074W	0.701085	-0.134265	0.192276	0.5211	no	no	no	no
YBR076W::chr2_2	YBR076W	ECM8	0.983243	0.0919846	0.0992663	0.404727	no	no	no	no
YBR077C::chr2_2	YBR077C	SLM4	1.69873	2.0474	0.00961252	0.00269708	no	no	no	no
YBR078W::chr2_2	YBR078W	ECM33	0.166585	2.16671	0.467677	0.00165406	no	no	no	no
YBR083W::chr00_16a	YBR083W	TEC1	0.65381	0.199352	0.211912	0.351724	yes	no	yes	no
YBR084C-A::chr00_16a	YBR084C-A	RPL19A	0.0968047	1.40853	0.508705	0.0254583	no	no	no	no
YBR084W::chr2_3	YBR084W	MIS1	0.638066	0.881582	0.218703	0.102518	no	no	no	no
YBR085W::chr2_3	YBR085W	AAC3	0.598286	-0.623229	0.236409	0.7544	no	no	no	no
YBR090C-A::chr2_3	YBR089C-A	NHP6B	-0.0278525	-0.234538	0.581487	0.572694	no	no	no	no
YBR090C::chr00_16a	YBR090C	YBR090C	1.34164	1.28046	0.0348076	0.0370712	no	no	no	no
YBR092C::chr2_3	YBR092C	PHO3	-0.573924	-0.902126	0.844039	0.853341	no	no	no	no
YBR093C::chr2_3	YBR093C	PHO5	-0.106706	-0.468248	0.626279	0.686863	no	no	no	no
YBR094W::chr2_3	YBR094W	PBY1	0.888106	2.46495	0.12602	0.000441835	no	yes	no	yes
YBR095C::chr2_3	YBR095C	RXT2	0.38699	1.12143	0.342289	0.057162	no	no	no	no
YBR098W::chr2_3	YBR098W	MMS4	0.151625	-0.0637614	0.476459	0.484559	yes	no	yes	no
YBR099C::chr2_3	YBR099C	YBR099C	0.818632	0.72387	0.148491	0.144035	no	no	no	no
YBR100W::chr2_3/chr00_16a	YBR098W	MMS4	0.249149	-0.207765	0.419607	0.559002	no	no	no	no
YBR101C::chr2_3	YBR101C	FES1	0.780073	-0.4032	0.162054	0.656319	no	no	no	no
YBR103W::chr2_3	YBR103W	SIF2	1.80126	0.187181	0.00634442	0.35761	yes	no	yes	no
YBR104W::chr2_3	YBR104W	YMC2	-0.999269	-1.04694	0.949353	0.892342	no	no	no	no
YBR105C::chr2_3	YBR105C	VID24	0.193601	0.996034	0.451861	0.0783756	no	no	no	no
YBR106W::chr2_3	YBR106W	PHO88	1.99879	-0.223272	0.0026867	0.566942	no	no	no	no
YBR107C::chr2_3	YBR107C	IML3	0.63091	0.63091	0.221831	0.173212	yes	yes	yes	yes
YBR115C::chr2_3	YBR115C	LYS2	0.360905	1.00256	0.356531	0.0771417	no	no	no	no
YBR116C::chr2_3	YBR116C	YBR116C	0.790969	-0.0935496	0.158142	0.5	yes	no	yes	no
YBR120C::chr2_3	YBR120C	CBP6	1.42179	1.20651	0.0266406	0.0455498	no	no	no	no
YBR125C::chr00_16a	YBR125C	PTC4	-0.564416	-2.01893	0.84066	0.993831	no	no	no	no
YBR128C::chr2_3	YBR128C	ATG14	0.388502	0.115564	0.34147	0.392897	yes	no	yes	no
YBR130C::chr2_3	YBR130C	SHE3	0.666873	0.415796	0.206372	0.253994	no	no	no	no
YBR134W::chr2_3	YBR134W	YBR134W	0.153286	0.05038	0.475483	0.425807	no	no	no	no
YBR137W::chr2_3	YBR137W	YBR137W	0.206194	-0.305603	0.444513	0.608571	no	no	no	no
YBR138C::chr2_3	YBR138C	YBR138C	-0.38503	0.11278	0.768088	0.394289	no	no	no	no
YBR139W::chr2_3	YBR139W	YBR139W	0.238741	-1.04238	0.425616	0.891241	no	no	no	no
YBR141C::chr2_3	YBR141C	YBR141C	0.0119295	-0.492513	0.558441	0.697951	no	no	no	no
YBR144C::chr2_3	YBR144C	YBR144C	-0.308613	0.0441341	0.73232	0.428992	no	no	no	no
YBR145W::chr2_3	YBR145W	ADH5	0.4342	0.0739144	0.317086	0.413853	no	no	no	no
YBR147W::chr2_3	YBR147W	RTC2	-0.590946	0.129824	0.84997	0.38579	no	no	no	no
YBR148W::chr2_3	YBR148W	YSW1	0.40644	-0.213432	0.331812	0.561907	no	no	no	no
YBR151W::chr2_3	YBR151W	APD1	-0.295193	-0.994614	0.725763	0.879215	no	no	no	no
YBR157C::chr2_3	YBR157C	ICS2	1.29448	-0.45609	0.0405059	0.681243	yes	no	yes	no
YBR161W::chr2_3	YBR161W	CSH1	-1.01955	-0.567048	0.952395	0.73085	no	no	no	no
YBR162W-A::chr2_3	YBR162W-A	YSY6	0.36505	0.531539	0.354254	0.208281	no	no	no	no
YBR163W::chr2_3	YBR163W	EXO5	0.578419	2.09473	0.245539	0.0022275	no	no	no	no
YBR164C::chr2_3	YBR164C	ARL1	0.848347	0.612142	0.138571	0.17953	yes	no	yes	no
YBR169C::chr00_16a	YBR169C	SSE2	0.360637	0.166263	0.356679	0.367807	no	no	no	no
YBR170C::chr2_3	YBR170C	NPL4	-0.259411	0.248441	0.707902	0.328352	no	no	no	no
YBR171W::chr2_3	YBR171W	SEC66	0.871787	1.52311	0.131072	0.0178163	no	yes	no	yes
YBR172C::chr2_3	YBR172C	SMY2	0.228255	0.370656	0.431688	0.273152	no	no	no	no
YBR174C::chr2_4	YBR174C	YBR174C	0.363905	1.43213	0.354882	0.0236914	no	no	no	no
YBR175W::chr2_4	YBR175W	SWD3	0.528074	0.994997	0.269497	0.0785732	no	no	no	no
YBR176W::chr2_4	YBR176W	ECM31	0.621734	0.256778	0.225878	0.324445	no	no	no	no
YBR177C::chr2_4	YBR177C	EHT1	0.545699	-0.235169	0.260978	0.573015	no	no	no	no
YBR178W::chr2_4	YBR178W	YBR178W	0.368158	0.395346	0.35255	0.262585	no	no	no	no
YBR180W::chr2_4	YBR180W	DTR1	0.529638	0.270733	0.268735	0.317949	no	no	no	no
YBR181C::chr2_4	YBR181C	RPS6B	0.995651	1.5519	0.0961089	0.0162373	no	no	no	no
YBR182C::chr2_4	YBR182C	SMP1	-1.08928	-1.26142	0.961751	0.935471	no	no	no	no
YBR183W::chr2_4	YBR183W	YPC1	0.689551	0.648657	0.196961	0.167369	no	no	no	no
YBR184W::chr2_4	YBR184W	YBR184W	-0.403538	-0.210329	0.776333	0.560317	no	no	no	no
YBR185C::chr2_4	YBR185C	MBA1	-0.0845752	0.934224	0.613851	0.0908152	no	no	no	no
YBR186W::chr2_4	YBR186W	PCH2	0.504598	0.204799	0.281057	0.349101	no	no	no	no
YBR188C::chr2_4	YBR188C	NTC20	1.36807	0.154887	0.0319127	0.373392	no	no	no	no
YBR194W::chr2_4	YBR194W	AIM4	0.207019	2.4189	0.444032	0.000546708	no	yes	no	yes
YBR195C::chr2_4	YBR195C	MSI1	0.967147	0.183262	0.103474	0.359514	no	no	no	no
YBR197C::chr2_4	YBR197C	YBR197C	1.89356	1.01192	0.0042877	0.0753984	no	no	no	no
YBR199W::chr2_4	YBR199W	KTR4	0.446318	0.273292	0.310746	0.316764	no	no	no	no
YBR200W::chr2_4	YBR200W	BEM1	0.397575	0.397575	0.336571	0.261641	yes	yes	yes	yes
YBR203W::chr2_4	YBR203W	COS111	-0.52626	-0.795592	0.826619	0.819224	no	no	no	no
YBR204C::chr2_4	YBR204C	LDH1	0.30434	0.289856	0.388087	0.309138	no	no	no	no
YBR205W::chr2_4	YBR205W	KTR3	0.1768	-0.64656	0.46169	0.763844	no	no	no	no
YBR208C::chr2_4	YBR208C	DUR1,2	-0.283063	-0.257631	0.719769	0.584434	no	no	no	no
YBR212W::chr2_4	YBR212W	NGR1	0.398156	-0.104533	0.336259	0.505694	no	no	no	no
YBR214W::chr2_4	YBR214W	SDS24	-0.0448807	-0.470584	0.591272	0.687938	no	no	no	no
YBR216C::chr2_4	YBR216C	YBP1	0.110793	-0.0296797	0.500474	0.466922	no	no	no	no
YBR219C::chr2_4	YBR219C	YBR219C	1.34463	0.577938	0.0344695	0.191413	no	no	no	no
YBR220C::chr2_4	YBR220C	YBR220C	0.348448	0.0292843	0.363405	0.436582	no	no	no	no
YBR221C::chr2_4	YBR221C	PDB1	-0.0773593	1.55314	0.609773	0.0161724	no	no	no	no
YBR222C::chr2_4	YBR222C	PCS60	-0.0398933	0.216174	0.588412	0.343645	no	no	no	no
YBR223C::chr2_4	YBR223C	TDP1	0.540247	-0.205484	0.263599	0.557832	no	no	no	no
YBR224W::chr2_4	YBR224W	YBR224W	0.344659	0.0945999	0.365504	0.40341	no	no	no	no
YBR225W::chr2_4	YBR225W	YBR225W	1.34981	1.11188	0.033891	0.0585991	no	no	no	no
YBR228W::chr2_4	YBR228W	SLX1	1.17288	0.727612	0.0587354	0.142935	no	no	no	no
YBR231C::chr2_4	YBR231C	SWC5	0.890734	0.401173	0.125219	0.260122	yes	no	yes	no
YBR232C::chr00_8	YBR232C	YBR232C	0.727697	-0.0205113	0.181729	0.462187	no	no	no	no
YBR238C::chr2_4	YBR238C	YBR238C	1.06885	0.717483	0.0789725	0.145927	yes	no	yes	no
YBR240C::chr2_4	YBR240C	THI2	-0.203427	-0.0370833	0.678922	0.470749	no	no	no	no
YBR242W::chr2_4	YBR242W	YBR242W	-0.37778	0.00227979	0.764813	0.450442	no	no	no	no
YBR246W::chr2_4	YBR246W	RRT2	0.0191164	-0.0914938	0.554254	0.498934	no	no	no	no
YBR248C::chr2_4	YBR248C	HIS7	-1.27106	-1.21211	0.979302	0.926991	no	no	no	no
YBR250W::chr2_4	YBR250W	SPO23	0.378492	-0.259594	0.346905	0.585428	no	no	no	no
YBR251W::chr2_4	YBR251W	MRPS5	0.831364	2.7512	0.144184	0.000109	no	no	no	yes
YBR264C::chr2_4	YBR264C	YPT10	0.234414	0.363337	0.42812	0.276324	no	no	no	no
YBR269C::chr00_1	YBR269C	FMP21	-0.365494	-1.43	0.759205	0.958799	no	no	no	no
YBR272C::chr00_16a	YBR272C	HSM3	-0.59668	-0.454684	0.851934	0.68059	no	no	no	no
YBR273C::chr00_1	YBR273C	UBX7	1.18345	1.18345	0.0569315	0.0484914	yes	yes	yes	yes
YBR275C::chr00_16a	YBR275C	RIF1	0.183451	-0.224057	0.457796	0.567343	yes	no	yes	no
YBR276C::chr00_16a	YBR276C	PPS1	-0.605223	-0.544009	0.854828	0.720875	no	no	no	no
YBR277C::chr00_1	YBR277C	YBR277C	0.443151	-0.743166	0.312397	0.800743	no	no	no	no
YBR278W::chr00_1	YBR278W	DPB3	0.324179	0.128462	0.376922	0.386467	no	no	no	no
YBR280C::chr00_16a	YBR280C	SAF1	0.64928	1.47709	0.213853	0.0206111	no	no	no	no
YBR281C::chr00_1	YBR281C	DUG2	-0.356526	-0.689594	0.755066	0.780727	no	no	no	no
YBR283C::chr00_1	YBR283C	SSH1	0.501385	1.69859	0.282657	0.0099251	no	no	no	no
YBR284W::chr00_1	YBR284W	YBR284W	0.88662	-1.11647	0.126474	0.908149	no	no	no	no
YBR285W::chr00_1	YBR285W	YBR285W	-0.540846	-0.866929	0.832077	0.842582	no	no	no	no
YBR286W::chr00_1	YBR286W	APE3	0.493791	-0.964216	0.286457	0.871092	yes	no	yes	no
YBR290W::chr00_1	YBR290W	BSD2	-0.422077	-0.222555	0.784421	0.566575	no	no	no	no
YBR292C::chr00_1	YBR292C	YBR292C	-0.916515	-2.02159	0.935309	0.993891	no	no	no	no
YBR293W::chr00_1	YBR293W	VBA2	-2.22413	-0.264855	0.999715	0.588091	no	no	no	no
YBR294W::chr00_16a	YBR294W	SUL1	0.0584371	-0.448431	0.531252	0.677681	no	no	no	no
YBR295W::chr00_1	YBR295W	PCA1	0.0805286	-1.52706	0.518277	0.968774	no	no	no	no
YBR296C::chr00_1	YBR296C	PHO89	0.204183	0.341531	0.445685	0.285882	no	no	no	no
YBR297W::chr00_1	YBR297W	MAL33	-0.576956	-0.947471	0.845107	0.866458	no	no	no	no
YBR300C::chr00_1	YBR300C	YBR300C	-0.0429082	-1.5147	0.590141	0.967627	no	no	no	no
YCL001W-A::chr00_1	YCL001W-A	YCL001W-A	0.709519	-1.17236	0.188894	0.919554	yes	no	yes	no
YCL006C::chr3_1/chr00_12	deleted	YCL006C	-0.461069	-0.360568	0.800869	0.635716	no	no	no	no
YCL009C::chr3_1	YCL009C	ILV6	0.00152272	-0.634105	0.564492	0.758827	no	no	no	no
YCL010C::chr3_1	YCL010C	SGF29	0.242476	-1.68711	0.423458	0.980825	no	no	no	no
YCL011C::chr3_1	YCL011C	GBP2	-0.097694	0.285208	0.621233	0.31127	no	no	no	no
YCL013W::chr3_1	deleted	YCL013W	0.0168165	-0.721325	0.555595	0.792719	no	no	no	no
YCL014W::chr3_1	YCL014W	BUD3	1.08334	-1.21197	0.0758719	0.926966	no	no	no	no
YCL022C::chr00_12	YCL022C	YCL022C	-1.42059	-1.36277	0.988092	0.950482	no	no	no	no
YCL023C::chr3_1/chr00_12	YCL023C	YCL023C	0.121874	-1.61716	0.493953	0.976157	no	no	no	no
YCL025C::chr3_1	YCL025C	AGP1	0.288294	-0.408938	0.397185	0.659059	no	no	no	no
YCL026C::chr3_1	deleted	YCL026C	-0.803707	-1.37909	0.911515	0.952615	no	no	no	no
YCL033C::chr3_1	YCL033C	MXR2	0.898452	-1.00376	0.122888	0.881587	no	no	no	no
YCL035C::chr00_11	YCL035C	GRX1	-0.150924	-0.00239316	0.650711	0.452847	no	no	no	no
YCL038C::chr00_12	YCL038C	ATG22	-1.8834	-1.30285	0.998374	0.941987	no	no	no	no
YCL047C::chr3_1	YCL047C	POF1	0.322756	-0.348397	0.37772	0.629759	no	no	no	no
YCL048W::chr3_1	YCL048W	SPS22	-1.22227	-0.664247	0.97544	0.770869	no	no	no	no
YCL050C::chr3_1	YCL050C	APA1	0.0727189	-0.140914	0.522867	0.524542	no	no	no	no
YCL056C::chr3_1	YCL056C	PEX34	0.147763	-0.309853	0.478728	0.610691	no	no	no	no
YCL062W::chr3_1	YCL063W	VAC17	-0.502802	0.940211	0.817608	0.0895498	no	no	no	no
YCL063W::chr3_1	YCL063W	VAC17	0.565262	-0.121312	0.251688	0.514392	no	no	no	no
YCL074W::chr00_12	YCL074W	YCL074W	0.0371826	-0.303849	0.543703	0.607695	no	no	no	no
YCL076W::chr00_12	YCL076W	YCL076W	-0.102819	-0.512827	0.624105	0.707094	no	no	no	no
YCR001W::chr3_1	YCR001W	YCR001W	-1.12307	-0.447333	0.965714	0.677169	no	no	no	no
YCR002C::chr3_1	YCR002C	CDC10	0.257802	0.200843	0.414626	0.351005	no	no	no	no
YCR004C::chr3_1	YCR004C	YCP4	-1.48818	-0.847114	0.990858	0.836302	no	no	no	no
YCR014C::chr3_1	YCR014C	POL4	0.88408	0.652229	0.127254	0.166209	no	no	no	no
YCR017C::chr3_1	YCR017C	CWH43	-0.92851	0.558249	0.937515	0.198466	no	no	no	no
YCR019W::chr3_1	YCR019W	MAK32	-0.0510498	-0.93183	0.594803	0.862028	no	no	no	no
YCR020C-A::chr3_1	YCR020C-A	MAK31	-1.44048	-0.385138	0.988973	0.647643	no	no	no	no
YCR023C::chr3_1	YCR023C	YCR023C	-0.116194	-0.612683	0.631568	0.750065	no	no	no	no
YCR024C::chr00_1	YCR024C	SLM5	0.893123	1.20454	0.124494	0.0457949	no	no	no	no
YCR025C::chr00_1	YCR025C	YCR025C	-1.28095	-0.763536	0.980018	0.808055	no	no	no	no
YCR027C::chr00_1	YCR027C	RHB1	-0.101884	-1.05806	0.623582	0.894995	no	no	no	no
YCR028C-A::chr00_16a	YCR028C-A	RIM1	1.34387	2.23006	0.0345552	0.00126433	no	no	no	no
YCR028C::chr00_1	YCR028C	FEN2	1.3569	0.47623	0.0331107	0.229493	no	no	no	no
YCR033W::chr00_16a	YCR033W	SNT1	0.12852	1.00988	0.490043	0.075775	no	no	no	no
YCR036W::chr00_1	YCR036W	RBK1	0.135445	-1.59326	0.485969	0.974358	yes	no	yes	no
YCR037C::chr00_1	YCR037C	PHO87	0.688812	0.614223	0.197264	0.178823	no	no	no	no
YCR043C::chr00_1	YCR043C	YCR043C	-0.0343321	-1.14764	0.585217	0.914649	no	no	no	no
YCR044C::chr00_1	YCR044C	PER1	-0.598533	0.691188	0.852565	0.153891	no	yes	no	yes
YCR045C::chr00_1	YCR045C	RRT12	1.30175	-0.606313	0.0395813	0.747427	yes	no	yes	no
YCR046C::chr00_16a	YCR046C	IMG1	-0.405418	2.14531	0.77716	0.00180861	no	no	no	no
YCR049C::chr00_1	YCR049C	YCR049C	1.12729	-0.370919	0.0670381	0.640758	yes	no	yes	no
YCR051W::chr00_1	YCR051W	YCR051W	1.46955	0.291041	0.0225845	0.308596	no	no	no	no
YCR060W::chr00_16a	YCR060W	TAH1	0.261423	-0.134121	0.412545	0.521026	no	no	no	no
YCR062W::chr00_16a	YCR061W	YCR061W	0.128501	-0.166186	0.490054	0.537605	no	no	no	no
YCR065W::chr00_1	YCR065W	HCM1	2.03834	0.28355	0.00224088	0.312032	no	no	no	no
YCR066W::chr00_1	YCR066W	RAD18	-0.565394	-0.48847	0.841009	0.696116	no	no	no	no
YCR067C::chr00_16a	YCR067C	SED4	-0.437115	-0.230724	0.790856	0.570748	no	no	no	no
YCR068W::chr00_1	YCR068W	ATG15	0.0517064	-1.01819	0.535199	0.885262	yes	no	yes	no
YCR069W::chr00_16a	YCR069W	CPR4	-0.649235	-0.472101	0.86913	0.688636	no	no	no	no
YCR075C::chr00_16a	YCR075C	ERS1	0.262222	-0.98856	0.412086	0.877627	no	no	no	no
YCR076C::chr00_1	YCR076C	FUB1	0.50493	0.398264	0.280892	0.26135	no	no	no	no
YCR079W::chr00_1	YCR079W	PTC6	-0.656186	0.00605317	0.871296	0.448501	no	no	no	no
YCR081W::chr00_1	YCR081W	SRB8	0.882662	0.470281	0.12769	0.231845	no	no	no	no
YCR082W::chr00_1	YCR082W	AHC2	0.584913	-1.97813	0.242534	0.992843	no	no	no	no
YCR083W::chr00_16a	YCR083W	TRX3	-0.980966	-1.06487	0.946477	0.896594	no	no	no	no
YCR085W::chr00_1	YCR085W	YCR085W	-0.658582	-0.996057	0.872037	0.879592	no	no	no	no
YCR087W::chr00_1	YCR087W	YCR087W	0.119082	-1.39455	0.495596	0.954568	yes	no	yes	no
YCR088W::chr00_16a	YCR088W	ABP1	-0.0143915	0.662423	0.573716	0.162926	no	no	no	no
YCR091W::chr00_2	YCR091W	KIN82	-0.250573	-0.0954657	0.703409	0.500994	no	no	no	no
YCR092C::chr00_2	YCR092C	MSH3	-0.442253	-0.705778	0.793028	0.786893	no	no	no	no
YCR095C::chr00_14	YCR095C	OCA4	-0.263189	-0.702791	0.709813	0.785762	no	no	no	no
YCR098C::chr00_2	YCR098C	GIT1	1.2105	-0.284584	0.0525131	0.59804	no	no	no	no
YCR099C::chr00_2	YCR099C	YCR099C	-0.880492	-1.84812	0.928322	0.988706	no	no	no	no
YCR101C::chr00_2	YCR101C	YCR101C	-0.604489	-0.254559	0.854581	0.582876	no	no	no	no
YCR102C::chr00_2	YCR102C	YCR102C	1.11445	0.263925	0.0695315	0.321111	no	no	no	no
YCR102W-A::chr00_14	YCR102W-A	YCR102W-A	0.334351	0.0534462	0.371237	0.424246	no	no	no	no
YCR105W::chr00_2	YCR105W	ADH7	-0.279471	-0.286786	0.717982	0.599147	no	no	no	no
YCR106W::chr00_2	YCR106W	RDS1	-0.434811	-0.347178	0.789877	0.62916	no	no	no	no
YDL010W::chr4_1	YDL010W	GRX6	0.665202	0.101909	0.207076	0.399737	no	no	no	no
YDL023C::chr4_1	YDL023C	YDL023C	4.99865	-2.29457	2.82269e-13	0.997886	yes	no	yes	no
YDL024C::chr4_1	YDL024C	DIA3	0.823388	0.0981124	0.146871	0.401644	no	no	no	no
YDL027C::chr4_1	YDL027C	YDL027C	1.36558	-0.666913	0.0321771	0.771917	no	no	no	no
YDL032W::chr4_1	YDL032W	YDL032W	-1.08255	0.58981	0.960919	0.187235	no	no	no	no
YDL038C::chr4_1	YDL039C	PRM7	-0.557659	0.683883	0.838229	0.156153	no	no	no	no
YDL039C::chr4_1	YDL039C	PRM7	-0.882216	-0.837113	0.928669	0.833072	no	no	no	no
YDL040C::chr4_1	YDL040C	NAT1	0.7113	1.87054	0.188184	0.00534555	no	no	no	no
YDL044C::chr4_1	YDL044C	MTF2	1.21522	2.69237	0.0517696	0.000146883	no	no	no	yes
YDL046W::chr4_1	YDL046W	NPC2	-0.687004	-0.78178	0.880602	0.814463	no	no	no	no
YDL049C::chr4_1	YDL049C	KNH1	-0.287975	-0.00532022	0.722204	0.454354	no	no	no	no
YDL050C::chr4_1	YDL050C	YDL050C	0.341092	-0.0542639	0.367485	0.47964	no	no	no	no
YDL051W::chr4_1	YDL051W	LHP1	-0.221314	-0.768244	0.688312	0.809721	no	no	no	no
YDL052C::chr4_1	YDL052C	SLC1	-0.134502	-0.809463	0.641704	0.823928	no	no	no	no
YDL053C::chr4_1	YDL053C	PBP4	0.337336	-0.661199	0.369574	0.769666	no	no	no	no
YDL056W::chr4_1	YDL056W	MBP1	1.53009	2.82589	0.0182023	7.4039e-05	no	no	no	yes
YDL061C::chr4_1	YDL061C	RPS29B	-0.376341	-0.249808	0.76416	0.580465	no	no	no	no
YDL062W::chr4_1	YDL062W	YDL062W	0.328954	-0.307733	0.37425	0.609634	no	no	no	no
YDL063C::chr4_1	YDL063C	YDL063C	0.514831	0.0391866	0.275988	0.431518	no	no	no	no
YDL068W::chr4_1	YDL068W	YDL068W	-0.302677	1.21998	0.729429	0.0438989	no	no	no	no
YDL069C::chr4_1	YDL069C	CBS1	-0.0345778	1.41666	0.585358	0.0248377	no	no	no	no
YDL071C::chr4_1	YDL071C	YDL071C	0.00200823	-0.780941	0.564211	0.814171	no	no	no	no
YDL076C::chr4_1	YDL076C	RXT3	-0.275673	-0.713178	0.716087	0.789678	no	no	no	no
YDL078C::chr4_1	YDL078C	MDH3	-0.266358	-0.286052	0.711412	0.598779	no	no	no	no
YDL080C::chr4_1	YDL080C	THI3	-1.18198	-0.780328	0.971813	0.813958	no	no	no	no
YDL082W::chr4_1	YDL082W	RPL13A	0.321618	-0.0359581	0.378358	0.470167	no	no	no	no
YDL083C::chr4_1	YDL083C	RPS16B	-0.770294	1.66768	0.903347	0.0110401	no	no	no	no
YDL085W::chr4_1	YDL085W	NDE2	-0.735823	-0.863709	0.894352	0.841572	no	no	no	no
YDL086W::chr4_1	YDL086W	YDL086W	-1.18883	-1.07338	0.972459	0.898569	no	no	no	no
YDL088C::chr4_1	YDL088C	ASM4	-0.599143	-0.356116	0.852772	0.633541	no	no	no	no
YDL089W::chr4_1	YDL089W	NUR1	0.319226	-0.811136	0.379701	0.824491	no	no	no	no
YDL095W::chr4_1	YDL095W	PMT1	-0.379279	0.00347514	0.765492	0.449827	no	no	no	no
YDL099W::chr4_2	YDL099W	BUG1	-0.160298	-0.501667	0.655815	0.702087	no	no	no	no
YDL100C::chr4_2	YDL100C	GET3	-1.5802	0.356287	0.993712	0.279397	no	yes	no	yes
YDL101C::chr4_2	YDL101C	DUN1	-0.310081	-0.412034	0.733032	0.660534	no	no	no	no
YDL107W::chr4_2	YDL107W	MSS2	-0.100414	1.92014	0.622759	0.004434	no	no	no	no
YDL109C::chr4_2	YDL109C	YDL109C	0.142094	-0.902508	0.48206	0.853455	no	no	no	no
YDL110C::chr4_2	YDL110C	TMA17	0.0552523	-0.282189	0.53312	0.596836	no	no	no	no
YDL112W::chr4_2	YDL112W	TRM3	-0.608317	-0.788438	0.855866	0.816768	no	no	no	no
YDL114W::chr4_2	YDL114W	YDL114W	-1.03172	-0.330594	0.954149	0.620988	no	no	no	no
YDL119C::chr4_2	YDL119C	YDL119C	-0.524273	1.75462	0.825867	0.00815319	no	no	no	no
YDL124W::chr4_2	YDL124W	YDL124W	0.261307	0.045607	0.412612	0.42824	no	no	no	no
YDL125C::chr4_2	YDL125C	HNT1	0.458438	-0.311853	0.30446	0.611687	no	no	no	no
YDL129W::chr4_2	YDL129W	YDL129W	0.626087	-0.372702	0.223953	0.641624	no	no	no	no
YDL133C-A::chr00_14	YDL133C-A	RPL41B	-0.151622	-0.491128	0.651092	0.697323	no	no	no	no
YDL134C-A::chr4_2	YDL133C-A	RPL41B	-1.50601	-0.58835	0.991486	0.739911	no	no	no	no
YDL135C::chr4_2	YDL135C	RDI1	0.205674	-0.561096	0.444816	0.72829	no	no	no	no
YDL136W::chr4_2	YDL136W	RPL35B	-0.0759928	1.52835	0.608999	0.0175192	no	no	no	no
YDL137W::chr4_2	YDL137W	ARF2	-1.32563	-1.6116	0.982998	0.975749	no	no	no	no
YDL142C::chr4_2	YDL142C	CRD1	-0.22856	-0.123588	0.692082	0.515571	no	no	no	no
YDL144C::chr4_2	YDL144C	YDL144C	-1.02553	-0.654198	0.953263	0.766892	no	no	no	no
YDL149W::chr4_2	YDL149W	ATG9	0.436628	0.0845901	0.315811	0.408455	no	no	no	no
YDL157C::chr4_2	YDL157C	YDL157C	-1.54855	-1.79019	0.992834	0.986274	no	no	no	no
YDL161W::chr4_2	YDL161W	ENT1	-0.255779	-0.439932	0.70606	0.673709	no	no	no	no
YDL162C::chr4_2	YDL162C	YDL162C	-1.01232	-0.693614	0.951328	0.782268	no	no	no	no
YDL167C::chr4_2	YDL167C	NRP1	-1.12257	-0.454099	0.965658	0.680318	no	no	no	no
YDL168W::chr4_2	YDL168W	SFA1	-0.493537	-0.506393	0.81397	0.704212	no	no	no	no
YDL170W::chr4_2	YDL170W	UGA3	-1.08631	-1.04345	0.961386	0.8915	no	no	no	no
YDL171C::chr4_2	YDL171C	GLT1	-0.583688	-0.581311	0.84746	0.736934	no	no	no	no
YDL172C::chr4_2	YDL172C	YDL172C	-0.113031	1.47253	0.629808	0.0209074	no	no	no	no
YDL179W::chr4_2	YDL179W	PCL9	0.383853	0.211512	0.34399	0.345877	no	no	no	no
YDL180W::chr4_2	YDL180W	YDL180W	0.0229084	-0.775048	0.552043	0.812114	no	no	no	no
YDL182W::chr4_2	YDL182W	LYS20	0.0384558	-0.394014	0.542959	0.651917	no	no	no	no
YDL183C::chr4_2	YDL183C	YDL183C	-0.192243	-0.78296	0.672992	0.814872	no	no	no	no
YDL184C::chr4_2	YDL184C	RPL41A	-0.291696	0.322694	0.724042	0.294263	no	no	no	no
YDL187C::chr4_2	YDL187C	YDL187C	0.148352	0.0332893	0.478382	0.434532	no	no	no	no
YDL188C::chr4_2	YDL188C	PPH22	-0.78145	-0.747171	0.906133	0.802194	no	no	no	no
YDL189W::chr4_2	YDL189W	RBS1	-0.647543	-0.398883	0.868599	0.654253	no	no	no	no
YDL191W::chr4_3	YDL191W	RPL35A	-0.724898	2.47463	0.891379	0.000422311	no	yes	no	yes
YDL194W::chr00_16b	YDL194W	SNF3	0.0255657	2.53263	0.550492	0.000321114	no	no	no	yes
YDL198C::chr4_3	YDL198C	GGC1	0.96586	2.2841	0.103816	0.00100037	no	no	no	no
YDL202W::chr4_3	YDL202W	MRPL11	-0.27512	2.33627	0.71581	0.000794489	no	no	no	yes
YDL203C::chr4_3	YDL203C	ACK1	-0.837902	-0.700059	0.919331	0.784726	no	no	no	no
YDL204W::chr4_3	YDL204W	RTN2	-0.679489	-0.452103	0.878378	0.679391	no	no	no	no
YDL211C::chr4_3	YDL211C	YDL211C	0.427277	0.0864233	0.320733	0.40753	no	no	no	no
YDL215C::chr4_3	YDL215C	GDH2	0.681436	-1.06736	0.200299	0.897176	no	no	no	no
YDL218W::chr4_3	YDL218W	YDL218W	0.47248	-1.31523	0.297249	0.94383	yes	no	yes	no
YDL219W::chr4_3	YDL219W	DTD1	-1.4282	-1.5751	0.988436	0.972917	no	no	no	no
YDL222C::chr4_3	YDL222C	FMP45	-1.17951	-0.37967	0.971577	0.645001	no	no	no	no
YDL223C::chr4_3	YDL223C	HBT1	-0.0659956	0.213445	0.603325	0.344952	no	no	no	no
YDL225W::chr4_3	YDL225W	SHS1	0.432341	-0.248294	0.318063	0.579696	no	no	no	no
YDL229W::chr4_3	YDL229W	SSB1	-0.0376742	-1.08719	0.587138	0.901717	no	no	no	no
YDL231C::chr4_3	YDL231C	BRE4	0.0270414	-0.843789	0.54963	0.835233	no	no	no	no
YDL233W::chr4_3	YDL233W	YDL233W	-0.667548	-0.601538	0.874784	0.74544	no	no	no	no
YDL240W::chr4_3	YDL240W	LRG1	0.0512517	-0.226699	0.535465	0.568694	no	no	no	no
YDL242W::chr4_3	YDL242W	YDL242W	0.472337	-0.609253	0.297322	0.748646	no	no	no	no
YDL243C::chr4_3	YDL243C	AAD4	-1.26621	-1.25469	0.978942	0.934361	no	no	no	no
YDR003W::chr4_3	YDR003W	RCR2	-1.59208	-1.578	0.994015	0.973151	no	no	no	no
YDR004W::chr4_3	YDR004W	RAD57	-0.445716	0.961579	0.794485	0.0851402	no	no	no	no
YDR008C::chr4_3	YDR008C	YDR008C	-0.0730962	1.11083	0.607357	0.0587589	no	yes	no	yes
YDR015C::chr4_3	YDR015C	YDR015C	-0.669588	-1.17715	0.875403	0.92048	no	no	no	no
YDR017C::chr4_3	YDR017C	KCS1	2.29164	1.876	0.000650558	0.00523753	no	no	yes	no
YDR018C::chr4_3	YDR018C	YDR018C	0.680844	-0.194534	0.200543	0.552209	no	no	no	no
YDR019C::chr4_3	YDR019C	GCV1	-0.709626	-0.136789	0.887123	0.522407	no	no	no	no
YDR024W::chr4_3	YDR024W	FYV1	-0.639457	1.75439	0.86604	0.00815993	no	no	no	no
YDR025W::chr4_3	YDR025W	RPS11A	-0.0871753	1.78777	0.615318	0.00724131	no	no	no	no
YDR031W::chr4_3	YDR031W	MIC14	0.268493	0.0543981	0.408489	0.423761	no	no	no	no
YDR032C::chr4_3	YDR032C	PST2	-1.50668	-0.628657	0.991509	0.756615	no	no	no	no
YDR033W::chr4_3	YDR033W	MRH1	-0.442801	-0.848933	0.793259	0.836885	no	no	no	no
YDR043C::chr4_3	YDR043C	NRG1	-0.402044	1.53482	0.775673	0.0171586	no	no	no	no
YDR046C::chr4_3	YDR046C	BAP3	0.677451	-0.431594	0.20195	0.669793	no	no	no	no
YDR049W::chr4_4	YDR049W	VMS1	0.152172	-0.490286	0.476137	0.69694	no	no	no	no
YDR051C::chr4_4	YDR051C	DET1	-1.11665	-1.12495	0.964988	0.909953	no	no	no	no
YDR056C::chr4_4	YDR056C	YDR056C	-0.720289	0.0576599	0.890107	0.422102	no	no	no	no
YDR057W::chr4_4	YDR057W	YOS9	-0.573629	0.792403	0.843935	0.124777	no	no	no	no
YDR058C::chr00_14	YDR058C	TGL2	0.318568	-0.14298	0.38007	0.525611	yes	no	yes	no
YDR061W::chr4_4	YDR061W	YDR061W	-0.588284	-0.459638	0.849053	0.682887	no	no	no	no
YDR063W::chr4_4	YDR063W	AIM7	-1.4282	-0.490319	0.988436	0.696955	no	no	no	no
YDR065W::chr4_4	YDR065W	RRG1	-0.489517	3.34762	0.812377	3.86842e-06	no	no	no	yes
YDR066C::chr4_4	YDR066C	RTR2	0.322284	-0.876103	0.377985	0.845435	no	no	no	no
YDR067C::chr4_4	YDR067C	OCA6	0.525679	-0.225009	0.270666	0.56783	no	no	no	no
YDR072C::chr4_4	YDR072C	IPT1	-0.0865617	-0.427717	0.614972	0.667966	no	no	no	no
YDR074W::chr00_11	YDR074W	TPS2	0.453472	0.257647	0.307029	0.324039	no	no	no	no
YDR075W::chr4_4	YDR075W	PPH3	0.831707	-1.42196	0.144069	0.957869	yes	no	yes	no
YDR078C::chr4_4	YDR078C	SHU2	-0.747929	-0.332916	0.897577	0.622135	no	no	no	no
YDR080W::chr4_4	YDR080W	VPS41	0.264702	1.34461	0.410663	0.0308041	no	yes	no	yes
YDR083W::chr4_4	YDR083W	RRP8	0.0574427	-1.87506	0.531835	0.989703	yes	no	yes	no
YDR084C::chr4_4	YDR084C	TVP23	-0.584478	-0.524357	0.847735	0.712227	no	no	no	no
YDR089W::chr4_4	YDR089W	YDR089W	-0.0827258	-0.678542	0.612807	0.776459	no	no	no	no
YDR093W::chr4_4	YDR093W	DNF2	-1.94344	-1.71397	0.998783	0.982397	no	no	no	no
YDR097C::chr4_4	YDR097C	MSH6	0.0953636	-1.00086	0.509552	0.88084	no	no	no	no
YDR098C::chr4_4	YDR098C	GRX3	-0.430561	0.261554	0.788065	0.322215	no	no	no	no
YDR099W::chr4_4	YDR099W	BMH2	0.0020795	-1.39956	0.564169	0.955186	no	no	no	no
YDR100W::chr4_4	YDR100W	TVP15	-0.589982	-0.548206	0.849639	0.722705	no	no	no	no
YDR101C::chr4_4	YDR101C	ARX1	0.517081	1.52532	0.27488	0.0176904	no	no	no	no
YDR109C::chr4_4	YDR109C	YDR109C	-0.187478	0.309446	0.670451	0.300225	no	no	no	no
YDR112W::chr4_4	YDR112W	IRC2	-0.415857	-0.107123	0.781726	0.507037	no	no	no	no
YDR114C::chr4_4	YDR114C	YDR114C	-0.0290298	1.17723	0.582166	0.0493105	no	no	no	no
YDR115W::chr4_4	YDR115W	YDR115W	0.308552	3.30326	0.385708	5.05793e-06	no	no	no	yes
YDR117C::chr4_4	YDR117C	TMA64	-0.610945	-0.419946	0.856744	0.664291	no	no	no	no
YDR122W::chr4_4	YDR122W	KIN1	-0.0532511	-0.261259	0.596061	0.586271	no	no	no	no
YDR124W::chr4_4	YDR124W	YDR124W	-0.421382	0.0894072	0.784121	0.406026	no	no	no	no
YDR131C::chr4_4	YDR131C	YDR131C	-0.283854	-1.35292	0.720162	0.949158	no	no	no	no
YDR132C::chr4_4	YDR132C	YDR132C	-1.21205	-1.10831	0.97456	0.90639	no	no	no	no
YDR135C::chr4_4	YDR135C	YCF1	0.126678	-0.553728	0.491126	0.725104	no	no	no	no
YDR136C::chr4_4	YDR136C	VPS61	-0.444905	0.440113	0.794144	0.243974	no	no	no	no
YDR139C::chr4_4	YDR139C	RUB1	-0.467119	-0.447272	0.803351	0.677141	no	no	no	no
YDR140W::chr4_4	YDR140W	MTQ2	0.671337	0.987053	0.204499	0.0800982	no	yes	no	yes
YDR144C::chr4_4	YDR144C	MKC7	-0.457981	0.35742	0.799594	0.278903	no	no	no	no
YDR146C::chr4_4	YDR146C	SWI5	-0.704124	0.0577819	0.885561	0.422039	no	no	no	no
YDR147W::chr4_5	YDR147W	EKI1	-0.127092	-0.616339	0.637613	0.751572	no	no	no	no
YDR148C::chr4_5	YDR148C	KGD2	1.33519	0.132442	0.0355456	0.38449	yes	no	yes	no
YDR149C::chr4_5	YDR149C	YDR149C	-0.920667	1.13545	0.936079	0.0551028	no	yes	no	yes
YDR150W::chr4_5	YDR150W	NUM1	-0.894867	3.02513	0.931177	2.52594e-05	no	no	no	yes
YDR151C::chr4_5	YDR151C	CTH1	0.104812	-1.55194	0.503993	0.97098	no	no	no	no
YDR152W::chr4_5	YDR152W	GIR2	-0.522044	-0.214834	0.825021	0.562625	no	no	no	no
YDR153C::chr4_5	YDR153C	ENT5	-0.235469	-1.06296	0.695657	0.896146	no	no	no	no
YDR154C::chr4_5	YDR154C	YDR154C	-0.138583	-0.904345	0.64395	0.854002	no	no	no	no
YDR155C::chr4_5	YDR155C	CPR1	-2.22261	-0.133418	0.999712	0.520662	no	no	no	no
YDR156W::chr4_5	YDR156W	RPA14	0.23995	-0.0225938	0.424918	0.463262	no	no	no	no
YDR157W::chr4_5	YDR157W	YDR157W	0.355878	-0.246126	0.3593	0.578594	no	no	no	no
YDR159W::chr4_5	YDR159W	SAC3	0.580584	2.05601	0.244535	0.00260554	no	yes	no	yes
YDR162C::chr4_5	YDR162C	NBP2	0.143924	1.34167	0.480984	0.0310706	no	no	no	no
YDR163W::chr4_5	YDR163W	CWC15	-0.256803	0.547626	0.70658	0.202336	no	no	no	no
YDR171W::chr4_5	YDR171W	HSP42	-0.682382	-1.4266	0.879237	0.958409	no	no	no	no
YDR173C::chr4_5	YDR173C	ARG82	-0.371313	0.397575	0.76187	0.261641	no	yes	no	yes
YDR174W::chr00_14	YDR174W	HMO1	0.388502	0.0797438	0.34147	0.410903	yes	no	yes	no
YDR178W::chr4_5	YDR178W	SDH4	-1.2047	-1.37325	0.97391	0.95186	no	no	no	no
YDR181C::chr4_5	YDR181C	SAS4	-0.499699	-0.0814655	0.816394	0.493735	no	no	no	no
YDR183W::chr4_5	YDR183W	PLP1	0.613671	0.119713	0.229469	0.390826	no	no	no	no
YDR184C::chr4_5	YDR184C	ATC1	-0.00132367	-0.213896	0.566145	0.562145	no	no	no	no
YDR185C::chr4_5	YDR185C	UPS3	-0.60097	-0.437838	0.853392	0.672727	no	no	no	no
YDR186C::chr4_5	YDR186C	YDR186C	0.159112	0.195734	0.472062	0.35347	no	no	no	no
YDR192C::chr4_5	YDR192C	NUP42	-0.455983	-0.61138	0.798767	0.749527	no	no	no	no
YDR193W::chr4_5	YDR193W	YDR193W	-0.331092	0.0351308	0.743122	0.433591	no	no	no	no
YDR195W::chr4_5	YDR195W	REF2	2.53343	-0.515432	0.000176866	0.708257	yes	no	yes	no
YDR197W::chr4_5	YDR197W	CBS2	-0.426727	0.848347	0.786423	0.11045	no	yes	no	yes
YDR198C::chr4_5	YDR198C	RKM2	-0.917699	-0.966644	0.93553	0.871754	no	no	no	no
YDR202C::chr00_14	YDR202C	RAV2	-0.847723	0.42814	0.921476	0.248881	no	no	no	no
YDR203W::chr4_5	YDR203W	YDR203W	0.189762	1.27482	0.454104	0.0376683	no	no	no	no
YDR204W::chr4_5	YDR204W	COQ4	-1.12868	0.487367	0.966338	0.225127	no	no	no	no
YDR205W::chr00_14	YDR205W	MSC2	-0.204164	-0.277451	0.679311	0.59445	no	no	no	no
YDR206W::chr4_5	YDR206W	EBS1	-0.462555	-0.288946	0.80148	0.600232	no	no	no	no
YDR207C::chr4_5	YDR207C	UME6	1.582	0.63806	0.015043	0.170843	yes	no	yes	no
YDR209C::chr4_5	YDR209C	YDR209C	-0.234481	-0.634641	0.695147	0.759044	no	no	no	no
YDR210W::chr4_5	YDR210W	YDR210W	-0.303396	-0.671013	0.72978	0.773524	no	no	no	no
YDR213W::chr4_5	YDR213W	UPC2	-0.856205	-0.928435	0.923294	0.861053	no	no	no	no
YDR214W::chr4_5	YDR214W	AHA1	-1.37534	-1.02625	0.985859	0.887279	no	no	no	no
YDR215C::chr4_5	YDR215C	YDR215C	-0.787465	-0.575442	0.907611	0.734439	no	no	no	no
YDR216W::chr4_5	YDR216W	ADR1	-0.639918	-0.263837	0.866187	0.587576	no	no	no	no
YDR217C::chr4_5	YDR217C	RAD9	0.0872577	-0.354102	0.51432	0.632555	no	no	no	no
YDR218C::chr4_5	YDR218C	SPR28	-0.0983273	-0.0497251	0.621589	0.47729	no	no	no	no
YDR219C::chr4_5	YDR219C	MFB1	-0.462858	0.0313408	0.801605	0.435529	no	no	no	no
YDR220C::chr4_5	YDR220C	YDR220C	-0.731675	-0.775772	0.89323	0.812367	no	no	no	no
YDR221W::chr4_5	YDR221W	GTB1	-1.0192	-0.47436	0.952343	0.689672	no	no	no	no
YDR222W::chr4_5	YDR222W	YDR222W	-0.411525	-0.808691	0.779838	0.823669	no	no	no	no
YDR223W::chr4_5	YDR223W	CRF1	0.651372	0.080538	0.212955	0.410502	no	no	no	no
YDR225W::chr4_5	YDR225W	HTA1	0.515235	2.02737	0.27579	0.00292152	no	no	no	no
YDR229W::chr4_5	YDR229W	IVY1	0.317127	0.277107	0.38088	0.315	no	no	no	no
YDR230W::chr4_5	YDR230W	YDR230W	0.468089	1.42257	0.299496	0.0243944	no	no	no	no
YDR233C::chr4_5	YDR233C	RTN1	0.660345	0.324695	0.20913	0.293368	no	no	no	no
YDR234W::chr4_5	YDR234W	LYS4	0.424382	0.567633	0.322263	0.195085	no	no	no	no
YDR241W::chr4_5	YDR241W	BUD26	0.1582	1.46818	0.472597	0.021193	no	yes	no	yes
YDR242W::chr00_17a	YDR242W	AMD2	0.556758	-0.351726	0.255705	0.631391	no	no	no	no
YDR244W::chr4_6	YDR244W	PEX5	1.27333	2.09558	0.0432976	0.0022198	no	yes	no	yes
YDR248C::chr4_6	YDR248C	YDR248C	1.41476	0.842417	0.0272863	0.11191	no	no	no	no
YDR251W::chr4_6	YDR251W	PAM1	0.52476	0.603523	0.271115	0.18248	no	no	no	no
YDR253C::chr4_6	YDR253C	MET32	0.848347	0.848347	0.138571	0.11045	yes	yes	yes	yes
YDR254W::chr4_6	YDR254W	CHL4	1.28466	1.22224	0.0417836	0.043626	no	no	no	no
YDR256C::chr4_6	YDR256C	CTA1	1.43551	0.374929	0.025417	0.271308	yes	no	yes	no
YDR259C::chr4_6	YDR259C	YAP6	1.13725	0.359254	0.0651504	0.278102	no	no	no	no
YDR265W::chr4_6	YDR265W	PEX10	1.27827	1.38076	0.0426314	0.0276764	no	no	no	no
YDR268W::chr4_6	YDR268W	MSW1	1.29933	1.29933	0.039887	0.0351274	yes	yes	yes	yes
YDR273W::chr4_6	YDR273W	DON1	0.824997	-0.185712	0.146327	0.547671	yes	no	yes	no
YDR281C::chr4_6	YDR281C	PHM6	0.208432	0.264158	0.443209	0.321003	no	no	no	no
YDR286C::chr4_6	YDR286C	YDR286C	0.471164	0.360622	0.297921	0.277506	no	no	no	no
YDR287W::chr4_6	YDR287W	INM2	0.442935	0.0140707	0.31251	0.444382	no	no	no	no
YDR291W::chr4_6	YDR291W	HRQ1	0.889554	0.46128	0.125578	0.235428	no	no	no	no
YDR293C::chr4_6	YDR293C	SSD1	0.819516	2.63571	0.148189	0.000194751	no	yes	no	yes
YDR294C::chr4_6	YDR294C	DPL1	0.777604	-0.461031	0.162949	0.683532	no	no	no	no
YDR295C::chr4_6	YDR295C	HDA2	1.08859	1.08859	0.0747725	0.0622231	yes	yes	yes	yes
YDR296W::chr4_6	YDR296W	MHR1	1.5766	2.23245	0.0153481	0.00125143	no	yes	no	yes
YDR297W::chr4_6	YDR297W	SUR2	0.607112	1.76896	0.232414	0.00774696	no	no	no	no
YDR298C::chr4_6	YDR298C	ATP5	0.668877	0.668877	0.20553	0.160869	yes	yes	yes	yes
YDR304C::chr4_6	YDR304C	CPR5	0.604948	0.0561773	0.23339	0.422856	no	no	no	no
YDR305C::chr4_6	YDR305C	HNT2	1.17647	0.159352	0.0581174	0.371197	no	no	no	no
YDR306C::chr4_6	YDR306C	YDR306C	-0.710953	-0.462393	0.887497	0.684162	no	no	no	no
YDR309C::chr4_6	YDR309C	GIC2	0.752588	0.752588	0.172199	0.135734	yes	yes	yes	yes
YDR310C::chr4_6	YDR310C	SUM1	1.49973	0.335084	0.0202995	0.288738	no	no	no	no
YDR312W::chr4_6	YDR312W	SSF2	1.23245	1.21932	0.0491309	0.0439777	yes	no	yes	no
YDR314C::chr4_6	YDR314C	RAD34	0.92922	0.45271	0.113898	0.238868	no	no	no	no
YDR316W::chr4_6	YDR316W	OMS1	0.848347	0.848347	0.138571	0.11045	yes	yes	yes	yes
YDR317W::chr4_6	YDR317W	HIM1	0.00497531	-0.66373	0.562487	0.770665	yes	no	yes	no
YDR319C::chr4_6	YDR319C	YDR319C	0.639942	0.520899	0.217887	0.212269	no	no	no	no
YDR320C::chr4_6	YDR320C	SWA2	0.470053	0.874579	0.29849	0.104154	no	yes	no	yes
YDR321W::chr4_6	YDR321W	ASP1	0.621517	0.546024	0.225974	0.202923	no	no	no	no
YDR322W::chr4_6	YDR322W	MRPL35	1.1965	1.67449	0.0547645	0.0107855	no	yes	no	yes
YDR326C::chr00_17a	YDR326C	YSP2	-0.258273	0.555394	0.707326	0.199502	no	no	no	no
YDR329C::chr4_6	YDR329C	PEX3	1.42121	2.05883	0.0266937	0.00257618	no	no	no	no
YDR334W::chr4_6	YDR334W	SWR1	0.436872	0.0931016	0.315683	0.404165	no	no	no	no
YDR337W::chr4_6	YDR337W	MRPS28	0.85824	0.85824	0.135371	0.108044	yes	yes	yes	yes
YDR338C::chr4_7	YDR338C	YDR338C	1.63283	0.438569	0.0124182	0.244604	yes	no	yes	no
YDR340W::chr4_7	YDR340W	YDR340W	0.429602	-0.102671	0.319506	0.504729	no	no	no	no
YDR344C::chr4_7	YDR344C	YDR344C	0.504818	-0.145058	0.280947	0.526687	no	no	no	no
YDR345C::chr4_7	YDR345C	HXT3	0.925653	0.925653	0.114916	0.09265	yes	yes	yes	yes
YDR346C::chr4_7	YDR346C	SVF1	0.0922239	0.922513	0.511399	0.0933289	no	yes	no	yes
YDR347W::chr4_7	YDR347W	MRP1	0.631713	2.05313	0.221478	0.00263585	no	no	no	no
YDR348C::chr4_7	YDR348C	PAL1	1.49089	1.06768	0.0209475	0.0656233	no	no	no	no
YDR349C::chr4_7	YDR349C	YPS7	-0.0701749	1.03884	0.6057	0.070548	no	no	no	no
YDR351W::chr4_7	YDR351W	SBE2	0.593362	0.713158	0.238654	0.147218	no	yes	no	yes
YDR352W::chr4_7	YDR352W	YDR352W	1.29595	0.730227	0.0403175	0.142169	no	no	no	no
YDR357C::chr4_7	YDR357C	CNL1	-0.139266	0.4855	0.644325	0.225856	no	no	no	no
YDR358W::chr4_7	YDR358W	GGA1	0.24507	0.24507	0.42196	0.329937	yes	yes	yes	yes
YDR360W::chr4_7	YDR360W	OPI7	0.796441	1.1988	0.156201	0.046517	no	no	no	no
YDR363W::chr4_7	YDR363W	ESC2	0.761463	1.60372	0.16888	0.0136965	no	yes	no	yes
YDR370C::chr4_7	YDR370C	YDR370C	0.469873	-0.173208	0.298582	0.541228	no	no	no	no
YDR371W::chr4_7	YDR371W	CTS2	0.112918	0.0398305	0.499223	0.431189	no	no	no	no
YDR372C::chr4_7	YDR372C	VPS74	1.27585	1.33509	0.0429562	0.0316738	no	no	no	no
YDR374C::chr4_7	YDR374C	YDR374C	0.566421	1.12937	0.251142	0.0559884	no	no	no	no
YDR378C::chr4_7	YDR378C	LSM6	1.0912	1.04401	0.0742303	0.0696454	no	no	no	no
YDR379W::chr4_7	YDR379W	RGA2	0.925653	0.681204	0.114916	0.156988	yes	no	yes	no
YDR380W::chr4_7	YDR380W	ARO10	0.245468	-0.336309	0.42173	0.62381	no	no	no	no
YDR384C::chr4_7	YDR384C	ATO3	-0.238821	-1.07736	0.697385	0.899484	no	no	no	no
YDR385W::chr4_7	YDR385W	EFT2	0.810593	1.04061	0.151254	0.0702378	no	no	no	no
YDR386W::chr4_7	YDR386W	MUS81	0.782473	0.482122	0.161187	0.227178	no	no	no	no
YDR387C::chr4_7	YDR387C	YDR387C	-1.31858	-0.1685	0.982554	0.5388	no	no	no	no
YDR391C::chr4_7	YDR391C	YDR391C	-0.0232584	0.667885	0.578839	0.161184	no	no	no	no
YDR393W::chr4_7	YDR393W	SHE9	1.09738	2.78679	0.0729591	9.07541e-05	no	no	no	yes
YDR395W::chr4_7	YDR395W	SXM1	1.17849	-0.310697	0.0577732	0.611111	no	no	no	no
YDR399W::chr4_7	YDR399W	HPT1	-0.0795674	-0.527608	0.611022	0.713666	no	no	no	no
YDR400W::chr4_7	YDR400W	URH1	-0.0489268	0.315173	0.593589	0.297641	no	no	no	no
YDR402C::chr4_7	YDR402C	DIT2	0.756416	-0.000930931	0.170762	0.452094	no	no	no	no
YDR403W::chr4_7	YDR403W	DIT1	-0.109355	0.158369	0.627759	0.37168	no	no	no	no
YDR405W::chr4_7	YDR405W	MRP20	1.0161	3.14964	0.0910671	1.24876e-05	no	no	no	yes
YDR406W::chr4_7	YDR406W	PDR15	0.488676	0.627971	0.28903	0.174192	no	no	no	no
YDR408C::chr4_7	YDR408C	ADE8	1.14671	1.56196	0.0633966	0.0157147	no	yes	no	yes
YDR409W::chr4_7	YDR409W	SIZ1	1.6332	0.825475	0.0124006	0.116158	no	no	no	no
YDR411C::chr4_7	YDR411C	DFM1	-0.498127	-0.362262	0.815778	0.636543	no	no	no	no
YDR414C::chr4_7	YDR414C	ERD1	0.758575	0.866929	0.169956	0.105962	no	no	no	no
YDR417C::chr00_17a/chr00_18	YDR417C	YDR417C	1.19205	3.37713	0.0554955	3.23082e-06	no	no	no	yes
YDR418W::chr4_7	YDR418W	RPL12B	0.453174	1.8367	0.307183	0.00605948	no	no	no	no
YDR419W::chr4_7	YDR419W	RAD30	-0.00255606	-0.416279	0.56686	0.662552	no	no	no	no
YDR421W::chr4_7	YDR421W	ARO80	0.0605036	-0.0845557	0.530039	0.495337	no	no	no	no
YDR423C::chr4_7	YDR423C	CAD1	0.670707	-0.468252	0.204763	0.686865	no	no	no	no
YDR424C::chr00_8	YDR424C	DYN2	0.797839	0.557506	0.155707	0.198735	yes	no	yes	no
YDR425W::chr4_7	YDR425W	SNX41	1.22308	1.46607	0.0505516	0.021333	no	no	no	no
YDR426C::chr4_7	YDR426C	YDR426C	0.504263	1.14465	0.281223	0.0537825	no	no	no	no
YDR428C::chr4_7	YDR428C	BNA7	-0.975061	-0.760665	0.945522	0.807035	no	no	no	no
YDR430C::chr4_7	YDR430C	CYM1	0.576026	-0.497892	0.246651	0.700384	no	no	no	no
YDR431W::chr4_7	YDR431W	YDR431W	-0.68833	-0.375804	0.880991	0.643128	no	no	no	no
YDR432W::chr4_7	YDR432W	NPL3	0.465123	0.680076	0.301018	0.157341	no	yes	no	yes
YDR433W::chr4_7	YDR433W	YDR433W	0.686585	0.893507	0.198177	0.0997752	no	no	no	no
YDR436W::chr4_7	YDR436W	PPZ2	0.748564	-0.0342937	0.173718	0.469307	no	no	no	no
YDR438W::chr4_8	YDR438W	THI74	1.44253	-0.831741	0.0248096	0.83132	no	no	no	no
YDR442W::chr4_8	YDR442W	YDR442W	1.77191	1.13416	0.00716102	0.0552889	yes	no	yes	no
YDR443C::chr4_8	YDR443C	SSN2	0.499652	-0.132641	0.283522	0.520259	no	no	no	no
YDR444W::chr00_17a	YDR444W	YDR444W	0.506098	-0.376814	0.280311	0.643618	no	no	no	no
YDR445C::chr00_14	YDR445C	YDR445C	0.617507	0.416215	0.227757	0.25382	no	no	no	no
YDR446W::chr4_8	YDR446W	ECM11	-0.639943	-0.370443	0.866194	0.640526	no	no	no	no
YDR461W::chr00_17a	YDR461W	MFA1	0.558383	0.287866	0.254934	0.31005	no	no	no	no
YDR465C::chr4_8	YDR465C	RMT2	1.1466	-0.115298	0.0634173	0.511275	no	no	no	no
YDR476C::chr4_8	YDR476C	YDR476C	-0.264757	0.373503	0.710605	0.271923	no	no	no	no
YDR479C::chr4_8	YDR479C	PEX29	0.0953636	-0.436994	0.509552	0.672331	no	no	no	no
YDR482C::chr4_8	YDR482C	CWC21	-0.431447	0.151638	0.788444	0.374992	no	no	no	no
YDR484W::chr4_8	YDR484W	VPS52	0.639265	1.14822	0.218182	0.0532774	no	no	no	no
YDR485C::chr4_8	YDR485C	VPS72	0.743828	0.113437	0.175516	0.393961	no	no	no	no
YDR491C::chr4_8	YDR491C	YDR491C	1.0901	-1.04084	0.0744579	0.890866	no	no	no	no
YDR497C::chr4_8	YDR497C	ITR1	0.191618	0.0741288	0.45302	0.413744	no	no	no	no
YDR500C::chr00_17a	YDR500C	RPL37B	1.46271	0.216067	0.023131	0.343697	no	no	no	no
YDR500C::chr4_8	YDR500C	RPL37B	0.365565	-1.1153	0.353971	0.907898	yes	no	yes	no
YDR501W::chr4_8	YDR501W	PLM2	0.334957	-0.144751	0.3709	0.526528	no	no	no	no
YDR502C::chr00_17a	YDR502C	SAM2	-0.533956	0.422392	0.829513	0.251255	no	no	no	no
YDR503C::chr4_8	YDR503C	LPP1	0.389134	-0.517872	0.341128	0.709345	no	no	no	no
YDR504C::chr4_8	YDR504C	SPG3	0.72496	0.352108	0.182797	0.281227	no	no	no	no
YDR505C::chr4_8	YDR505C	PSP1	-0.346204	-0.546669	0.750255	0.722035	no	no	no	no
YDR506C::chr00_17a	YDR506C	GMC1	0.291552	-0.222491	0.395333	0.566543	no	no	no	no
YDR506C::chr4_8	YDR506C	GMC1	1.45076	0.555688	0.0241136	0.199395	no	no	no	no
YDR507C::chr4_8	YDR507C	GIN4	0.704459	1.8787	0.190919	0.0051849	no	no	no	no
YDR511W::chr4_8	YDR511W	ACN9	0.778986	0.715646	0.162447	0.146474	no	no	no	no
YDR512C::chr00_17a	YDR512C	EMI1	1.30505	2.29812	0.0391673	0.000940687	no	yes	no	yes
YDR515W::chr00_17a	YDR515W	SLF1	0.677155	-0.247462	0.202073	0.579273	no	no	no	no
YDR516C::chr4_8	YDR516C	EMI2	1.78925	0.567583	0.00666813	0.195103	yes	no	yes	no
YDR518W::chr4_8	YDR518W	EUG1	-0.0967653	1.8163	0.620712	0.00652976	no	no	no	no
YDR519W::chr4_8	YDR519W	FPR2	1.24803	1.52311	0.046837	0.0178163	no	yes	no	yes
YDR520C::chr4_8	YDR520C	URC2	0.574521	-0.228262	0.247352	0.569492	no	no	no	no
YDR521W::chr4_8	YDR521W	YDR521W	-0.228509	-0.0388844	0.692055	0.471681	no	no	no	no
YDR522C::chr4_8	YDR522C	SPS2	-0.545768	0.198783	0.833893	0.351998	no	no	no	no
YDR523C::chr4_8	YDR523C	SPS1	-0.204305	-0.303239	0.679385	0.607391	no	no	no	no
YDR525W-A::chr00_2	YDR525W-A	SNA2	-0.364955	-0.360917	0.758957	0.635886	no	no	no	no
YDR525W::chr4_8	YDR525W	API2	1.0181	0.499528	0.0905847	0.220414	no	no	no	no
YDR528W::chr4_8	YDR528W	HLR1	0.139361	-0.0132715	0.483667	0.458452	no	no	no	no
YDR529C::chr4_8	YDR529C	QCR7	0.897504	2.19644	0.123173	0.00145926	no	no	no	no
YDR530C::chr4_8	YDR530C	APA2	-0.348268	0.17962	0.751221	0.361285	no	no	no	no
YDR533C::chr4_8	YDR533C	HSP31	0.475652	1.01153	0.295631	0.0754695	no	no	no	no
YDR536W::chr00_2	YDR536W	STL1	0.262243	0.409982	0.412074	0.256421	no	no	no	no
YDR537C::chr00_14	YDR537C	YDR537C	0.518708	-0.347954	0.27408	0.629541	no	no	no	no
YDR538W::chr00_2	YDR538W	PAD1	0.669793	0.476539	0.205146	0.229371	no	no	no	no
YDR539W::chr00_2	YDR539W	FDC1	-0.640363	-0.458487	0.866328	0.682354	no	no	no	no
YEL001C::chr5_2	YEL001C	IRC22	-0.634919	-0.697301	0.864589	0.783676	no	no	no	no
YEL003W::chr5_2	YEL003W	GIM4	-0.224326	-1.93186	0.689881	0.991557	no	no	no	no
YEL005C::chr5_2	YEL005C	VAB2	0.818635	0.347309	0.148489	0.283334	no	no	no	no
YEL006W::chr5_2	YEL006W	YEA6	0.679361	0.377599	0.201157	0.27016	no	no	no	no
YEL010W::chr5_2	YEL010W	YEL010W	-0.736094	-1.3289	0.894425	0.945811	no	no	no	no
YEL011W::chr00_8	YEL011W	GLC3	-0.979317	-0.0119972	0.946212	0.457795	no	no	no	no
YEL012W::chr00_10	YEL012W	UBC8	0.901	0.626537	0.122125	0.174672	no	no	no	no
YEL016C::chr5_2	YEL016C	NPP2	-0.199286	-0.227355	0.676731	0.569028	no	no	no	no
YEL017C-A::chr5_2	YEL017C-A	PMP2	-1.72184	-0.94162	0.996579	0.864812	no	no	no	no
YEL020C::chr5_2	YEL020C	YEL020C	0.581006	-0.533559	0.244339	0.716292	no	no	no	no
YEL023C::chr5_2	YEL023C	YEL023C	-0.298761	-0.318132	0.727514	0.614811	no	no	no	no
YEL025C::chr5_2	YEL025C	YEL025C	-0.700222	-0.579582	0.884444	0.7362	no	no	no	no
YEL027W::chr5_2	YEL027W	VMA3	0.0856811	0.124557	0.515248	0.388411	no	yes	no	yes
YEL030W::chr5_2	YEL030W	ECM10	-0.0626554	0.301473	0.601425	0.303838	no	no	no	no
YEL037C::chr5_2	YEL037C	RAD23	0.384926	0.128293	0.343408	0.386551	no	no	no	no
YEL038W::chr5_2	YEL038W	UTR4	0.138658	0.458587	0.48408	0.236506	no	no	no	no
YEL039C::chr5_2	YEL039C	CYC7	-0.330054	-0.26505	0.742629	0.58819	no	no	no	no
YEL040W::chr5_2	YEL040W	UTR2	-0.23825	-0.46161	0.697091	0.6838	no	no	no	no
YEL041W::chr5_2	YEL041W	YEF1	-0.839348	-0.808217	0.91965	0.823509	no	no	no	no
YEL042W::chr5_2	YEL042W	GDA1	-0.267677	-0.548919	0.712076	0.723016	no	no	no	no
YEL048C::chr5_2	YEL048C	TCA17	-0.61681	-0.561123	0.858691	0.728302	no	no	no	no
YEL049W::chr5_2	YEL049W	PAU2	-1.42113	-1.80757	0.988117	0.987048	no	no	no	no
YEL050C::chr5_2	YEL050C	RML2	0.666401	0.996322	0.206571	0.0783209	no	no	no	no
YEL056W::chr5_2	YEL056W	HAT2	-0.770069	-0.253732	0.90329	0.582457	no	no	no	no
YEL057C::chr5_2	YEL057C	YEL057C	-0.566749	-0.417306	0.841493	0.663039	no	no	no	no
YEL059W::chr5_2	YEL059W	HHY1	-0.401061	-0.687828	0.775239	0.780049	no	no	no	no
YEL060C::chr5_2	YEL060C	PRB1	1.02243	1.51062	0.0895469	0.018541	no	yes	no	yes
YEL061C::chr5_2	YEL061C	CIN8	0.210114	-0.243205	0.44223	0.577108	no	no	no	no
YEL062W::chr5_2	YEL062W	NPR2	0.558863	-0.166262	0.254707	0.537645	no	no	no	no
YEL063C::chr5_2	YEL063C	CAN1	1.16655	1.25389	0.0598371	0.0399554	no	no	no	no
YEL064C::chr5_2	YEL064C	AVT2	-1.90259	-0.530589	0.998516	0.714983	no	no	no	no
YEL067C::chr5_2	YEL067C	YEL067C	0.380081	0.098188	0.34604	0.401606	no	no	no	no
YEL071W::chr5_2	YEL071W	DLD3	-0.124549	0.102422	0.636206	0.399479	no	no	no	no
YEL072W::chr5_2	YEL072W	RMD6	-0.583	-0.632745	0.847221	0.758276	no	no	no	no
YER001W::chr5_2	YER001W	MNN1	0.250543	-0.241844	0.418804	0.576415	no	no	no	no
YER002W::chr5_2	YER002W	NOP16	-0.446231	0.147106	0.7947	0.377228	no	no	no	no
YER004W::chr5_2	YER004W	FMP52	-1.37968	-1.67364	0.986088	0.979992	no	no	no	no
YER007C-A::chr5_2	YER007C-A	TMA20	-0.810859	0.512076	0.913195	0.21561	no	no	no	no
YER007W::chr5_2	YER007W	PAC2	-0.60661	-0.632364	0.855294	0.758122	no	no	no	no
YER010C::chr5_2	YER010C	YER010C	-0.135417	-0.125468	0.642207	0.516544	no	no	no	no
YER011W::chr5_2	YER011W	TIR1	-0.859649	-0.0973408	0.924023	0.501966	no	no	no	no
YER016W::chr5_3	YER016W	BIM1	1.21934	0.734467	0.0511283	0.140933	no	no	no	no
YER017C::chr5_3	YER017C	AFG3	1.14689	3.38166	0.0633635	3.14243e-06	no	yes	no	yes
YER019C-A::chr5_3	YER019C-A	SBH2	1.19289	0.964597	0.0553572	0.0845307	no	no	no	no
YER019W::chr5_3	YER019W	ISC1	0.248616	0.00792237	0.419915	0.44754	no	no	no	no
YER028C::chr5_3	YER028C	MIG3	0.912311	1.30163	0.118779	0.0348965	no	no	no	no
YER032W::chr5_3	YER032W	FIR1	-0.211318	-0.806884	0.683079	0.82306	no	no	no	no
YER033C::chr5_3	YER033C	ZRG8	1.21994	1.5055	0.0510362	0.0188446	no	no	no	no
YER034W::chr5_3	YER034W	YER034W	0.492061	-0.469546	0.287326	0.687461	no	no	no	no
YER038W-A::chr5_3	YER038W-A	YER038W-A	-0.675135	-0.42923	0.877076	0.668679	no	no	no	no
YER040W::chr5_3	YER040W	GLN3	0.621766	-0.00791106	0.225864	0.455689	no	no	no	no
YER041W::chr5_3	YER041W	YEN1	0.900342	0.386706	0.122322	0.266259	yes	no	yes	no
YER042W::chr5_3	YER042W	MXR1	0.861523	0.314178	0.134321	0.298089	yes	no	yes	no
YER044C::chr5_3	YER044C	ERG28	0.780603	0.780603	0.161862	0.127958	yes	yes	yes	yes
YER045C::chr5_3	YER045C	ACA1	-0.621078	-0.974371	0.860097	0.873847	no	no	no	no
YER046W::chr00_10	YER046W	SPO73	0.794734	-0.248095	0.156804	0.579595	no	no	no	no
YER050C::chr5_3	YER050C	RSM18	0.188073	1.68188	0.455092	0.0105148	no	no	no	no
YER051W::chr5_3	YER051W	JHD1	0.405593	0.123762	0.332266	0.388807	no	no	no	no
YER053C::chr5_3	YER053C	PIC2	-1.63306	-1.74332	0.994966	0.983989	no	no	no	no
YER055C::chr5_3	YER055C	HIS1	-0.852319	-1.27353	0.922465	0.937432	no	no	no	no
YER057C::chr5_3	YER057C	HMF1	-0.893415	-0.809409	0.930893	0.82391	no	no	no	no
YER058W::chr5_3	YER058W	PET117	-0.133604	1.65192	0.641209	0.0116493	no	yes	no	yes
YER059W::chr5_3	YER059W	PCL6	-0.700111	-0.352815	0.884412	0.631925	no	no	no	no
YER060W-A::chr5_3	YER060W-A	FCY22	-0.0245724	-0.139509	0.579597	0.523815	no	no	no	no
YER060W::chr5_3	YER060W	FCY21	-0.44538	-0.852051	0.794344	0.837882	no	no	no	no
YER061C::chr5_3	YER061C	CEM1	0.563345	2.14974	0.25259	0.00177557	no	no	no	no
YER062C::chr5_3	YER062C	HOR2	1.73262	0.147024	0.00839837	0.377268	no	no	no	no
YER063W::chr00_10	YER063W	THO1	-0.266991	-0.098637	0.71173	0.502638	no	no	no	no
YER064C::chr00_8	YER064C	VHR2	-0.174739	-0.384337	0.663622	0.647256	no	no	no	no
YER065C::chr5_3	YER065C	ICL1	-0.86792	-1.02221	0.925752	0.886273	no	no	no	no
YER067C-A::chr5_3	YER067C-A	YER067C-A	0.803377	-0.404527	0.153763	0.656954	no	no	no	no
YER067W::chr5_3	YER067W	RGI1	0.54974	0.503377	0.259045	0.218934	no	no	no	no
YER068C-A::chr5_3	YER068C-A	YER068C-A	0.462732	0.34001	0.302247	0.286555	no	no	no	no
YER069W::chr5_3	YER069W	ARG5,6	-0.426261	-0.10891	0.786223	0.507964	no	no	no	no
YER072W::chr5_3	YER072W	VTC1	0.6535	1.40363	0.212045	0.0258381	no	no	no	no
YER073W::chr5_3	YER073W	ALD5	-1.2043	-1.25971	0.973874	0.93519	no	no	no	no
YER075C::chr5_3	YER075C	PTP3	0.213032	-1.73125	0.440531	0.98335	no	no	no	no
YER077C::chr00_8	YER077C	YER077C	0.704321	2.02418	0.190974	0.00295873	no	no	no	no
YER078C::chr00_8	YER078C	ICP55	-0.342394	-1.42244	0.748467	0.957925	no	no	no	no
YER079W::chr5_3	YER079W	YER079W	0.442692	0.124391	0.312637	0.388493	no	no	no	no
YER080W::chr5_3	YER080W	AIM9	-0.458639	-0.210173	0.799866	0.560237	no	no	no	no
YER085C::chr5_3	YER085C	YER085C	0.100271	-1.01457	0.506665	0.884348	no	no	no	no
YER087C-A::chr5_3	YER087C-A	YER087C-A	0.829557	0.233441	0.14479	0.335428	no	no	no	no
YER088C::chr00_8	YER088C	DOT6	0.180554	-0.422309	0.459491	0.66541	no	no	no	no
YER093C-A::chr00_8	YER093C-A	AIM11	1.25409	1.21845	0.0459683	0.044084	no	no	no	no
YER095W::chr00_8	YER095W	RAD51	-0.284681	0.706079	0.720572	0.149346	no	no	no	no
YER096W::chr00_8	YER096W	SHC1	0.516385	-0.020099	0.275223	0.461975	no	no	no	no
YER098W::chr00_8	YER098W	UBP9	0.045246	-0.977561	0.538984	0.874703	no	no	no	no
YER101C::chr00_5	YER101C	AST2	-0.153763	-0.217785	0.652259	0.564136	no	no	no	no
YER103W::chr00_5	YER103W	SSA4	0.799001	0.131713	0.155298	0.384851	no	no	no	no
YER106W::chr00_5	YER106W	MAM1	-0.326135	0.0631735	0.74076	0.419299	no	no	no	no
YER108C::chr00_5	YER109C	FLO8	0.3291	-0.738755	0.374169	0.799138	no	no	no	no
YER109C::chr00_5	YER109C	FLO8	-0.107542	-1.23848	0.626746	0.931627	no	no	no	no
YER111C::chr00_5	YER111C	SWI4	0.0214196	-0.632892	0.552911	0.758336	no	no	no	no
YER113C::chr00_5	YER113C	TMN3	0.18825	0.143638	0.454988	0.378942	no	no	no	no
YER114C::chr00_5	YER114C	BOI2	-0.458211	-0.56344	0.799689	0.729299	no	no	no	no
YER117W::chr00_5	YER117W	RPL23B	-0.0295142	0.710532	0.582445	0.148005	no	no	no	no
YER119C-A::chr00_5	YER119C-A	YER119C-A	0.0627983	-0.744499	0.528692	0.801226	no	no	no	no
YER121W::chr00_5	YER121W	YER121W	-0.869062	-0.663057	0.925988	0.7704	no	no	no	no
YER122C::chr00_5	YER122C	GLO3	0.383849	3.01543	0.343992	2.66572e-05	no	no	no	yes
YER123W::chr00_5	YER123W	YCK3	0.297984	-1.33583	0.391684	0.946794	no	no	no	no
YER124C::chr00_5	YER124C	DSE1	-1.30431	-0.977726	0.981627	0.874748	no	no	no	no
YER128W::chr00_5	YER128W	VFA1	0.5964	0.0401685	0.237267	0.431016	no	no	no	no
YER129W::chr00_5	YER129W	SAK1	-0.273444	-1.50713	0.714971	0.966908	no	no	no	no
YER132C::chr00_5	YER132C	PMD1	-0.57711	-0.318302	0.845161	0.614895	no	no	no	no
YER134C::chr00_5	YER134C	YER134C	0.560831	0.45102	0.253776	0.239549	no	no	no	no
YER135C::chr00_5	YER135C	YER135C	0.578997	-0.291527	0.24527	0.601527	no	no	no	no
YER137C::chr00_5	YER137C	YER137C	-0.632669	-0.0528054	0.863865	0.478885	no	no	no	no
YER140W::chr00_5	YER140W	YER140W	0.548912	0.595097	0.25944	0.185393	no	no	no	no
YER142C::chr00_5	YER142C	MAG1	0.140859	-0.393097	0.482786	0.651476	yes	no	yes	no
YER144C::chr00_2	YER144C	UBP5	1.12063	0.270782	0.0683233	0.317926	no	no	no	no
YER145C::chr00_5	YER145C	FTR1	0.625505	-0.0401525	0.22421	0.472336	no	no	no	no
YER149C::chr00_5	YER149C	PEA2	-0.679847	-0.137723	0.878484	0.522891	no	no	no	no
YER150W::chr00_5	YER150W	SPI1	1.43771	0.468684	0.0252252	0.232478	yes	no	yes	no
YER151C::chr00_5	YER151C	UBP3	1.08258	1.42318	0.0760318	0.0243489	no	no	no	no
YER152C::chr00_5	YER152C	YER152C	-0.00686691	-0.336227	0.56936	0.62377	no	no	no	no
YER154W::chr00_5	YER154W	OXA1	-0.197326	1.03236	0.675692	0.0716937	no	no	no	no
YER161C::chr00_5	YER161C	SPT2	-0.70038	-0.819789	0.884489	0.82738	no	no	no	no
YER163C::chr00_5	YER163C	YER163C	-0.790551	-0.571191	0.908362	0.732624	no	no	no	no
YER166W::chr00_5	YER166W	DNF1	-0.515502	-0.471423	0.822522	0.688324	no	no	no	no
YER167W::chr00_5	YER167W	BCK2	0.711469	-0.210969	0.188117	0.560645	no	no	no	no
YER170W::chr00_5	YER170W	ADK2	-0.845135	-1.87635	0.920915	0.989749	no	no	no	no
YER173W::chr00_5	YER173W	RAD24	-0.27406	-0.216637	0.715279	0.563548	no	no	no	no
YER174C::chr00_5	YER174C	GRX4	-0.573212	-0.942926	0.843788	0.865181	no	no	no	no
YER175C::chr00_5	YER175C	TMT1	-0.619207	-0.537315	0.859482	0.717943	no	no	no	no
YER180C::chr00_5	YER180C	ISC10	-0.100831	-0.761977	0.622992	0.807501	no	no	no	no
YER181C::chr00_5	YER181C	YER181C	-0.879957	-0.480354	0.928214	0.692417	no	no	no	no
YER182W::chr00_5	YER182W	FMP10	0.429267	-0.13517	0.319683	0.521569	no	no	no	no
YER183C::chr00_5	YER183C	FAU1	-0.143595	0.167109	0.646701	0.367393	no	no	no	no
YER184C::chr00_5	YER184C	YER184C	0.335567	0.303741	0.370559	0.302808	no	no	no	no
YER185W::chr00_5	YER185W	PUG1	-0.789331	0.198814	0.908066	0.351983	no	no	no	no
YER186C::chr00_5	YER186C	YER186C	0.704039	-0.0705141	0.191087	0.488058	no	no	no	no
YER187W::chr00_5	YER187W	YER187W	1.03395	0.711718	0.0868305	0.147649	no	no	no	no
YER188W::chr00_2	YER188W	YER188W	0.583989	0.0567745	0.24296	0.422552	yes	no	yes	no
YFL004W::chr00_17a	YFL004W	VTC2	0.773907	0.975492	0.164295	0.0823578	no	no	no	no
YFL007W::chr00_17a	YFL007W	BLM10	-0.0719884	0.0470328	0.606729	0.427513	no	no	no	no
YFL010W-A::chr00_17a	YFL010W-A	AUA1	-0.196793	0.711561	0.67541	0.147696	no	no	no	no
YFL011W::chr6_1	YFL011W	HXT10	0.0977593	-0.393272	0.508143	0.65156	no	no	no	no
YFL012W::chr00_17a	YFL012W	YFL012W	0.186781	0.147328	0.455848	0.377118	no	no	no	no
YFL013C::chr00_17a	YFL013C	IES1	-0.118266	-0.45424	0.63272	0.680384	no	no	no	no
YFL014W::chr00_15	YFL014W	HSP12	-0.0283472	0.102427	0.581772	0.399477	no	no	no	no
YFL015C::chr6_1	YFL015C	YFL015C	0.522973	0.392655	0.271989	0.263727	no	no	no	no
YFL016C::chr00_17a	YFL016C	MDJ1	0.906729	2.66513	0.120422	0.000168329	no	yes	no	yes
YFL019C::chr00_15	YFL019C	YFL019C	0.529517	0.299947	0.268795	0.304532	no	no	no	no
YFL020C::chr6_1	YFL020C	PAU5	0.401531	0.0370266	0.334444	0.432621	no	no	no	no
YFL021W::chr6_1	YFL021W	GAT1	-0.334476	-1.00037	0.744729	0.880712	no	no	no	no
YFL025C::chr6_1	YFL025C	BST1	0.264542	1.71833	0.410755	0.00926576	no	no	no	no
YFL030W::chr6_1	YFL030W	AGX1	0.407179	-0.00758699	0.331417	0.455522	no	no	no	no
YFL031W::chr6_1	YFL031W	HAC1	0.573386	0.495108	0.247881	0.22212	no	no	no	no
YFL033C::chr00_17a/chr00_18	YFL033C	RIM15	1.07274	1.0636	0.0781299	0.0663042	no	no	no	no
YFL035C-B::chr6_1	YFL034C-A	RPL22B	-0.385185	-0.51584	0.768158	0.70844	no	no	no	no
YFL036W::chr6_1	YFL036W	RPO41	-0.793782	2.34731	0.909145	0.000756249	no	no	no	yes
YFL040W::chr6_1	YFL040W	YFL040W	-0.966346	-1.46661	0.944088	0.962829	no	no	no	no
YFL042C::chr00_15	YFL042C	YFL042C	0.0109904	0.843783	0.558988	0.111572	no	no	no	no
YFL043C::chr6_1	YFL042C	YFL042C	-0.37132	-0.481203	0.761873	0.692805	no	no	no	no
YFL046W::chr6_1	YFL046W	FMP32	-0.395274	-0.386685	0.772672	0.648389	no	no	no	no
YFL048C::chr6_1	YFL048C	EMP47	1.20428	0.789453	0.0535031	0.125567	yes	no	yes	no
YFL050C::chr6_1	YFL050C	ALR2	-1.26902	-1.64675	0.979151	0.978237	no	no	no	no
YFL051C::chr6_1	YFL051C	YFL051C	-1.61497	-1.53841	0.994564	0.969797	no	no	no	no
YFL052W::chr6_1	YFL052W	YFL052W	-0.181023	-0.0947427	0.666998	0.500619	no	no	no	no
YFL053W::chr6_1	YFL053W	DAK2	0.153477	-0.654348	0.475371	0.766952	no	no	no	no
YFL054C::chr6_1	YFL054C	YFL054C	-0.480463	-0.783741	0.80876	0.815143	no	no	no	no
YFL055W::chr6_1	YFL055W	AGP3	-0.671643	-0.81311	0.876025	0.825152	no	no	no	no
YFR007W::chr6_1	YFR007W	YFH7	0.58079	0.0239054	0.244439	0.439337	no	no	no	no
YFR008W::chr6_1	YFR008W	FAR7	-0.746495	-0.231669	0.897199	0.571231	no	no	no	no
YFR009W::chr6_1	YFR009W	GCN20	-0.174945	0.213658	0.663733	0.344849	no	no	no	no
YFR011C::chr00_16b	YFR011C	AIM13	0.276764	-0.424636	0.403758	0.666511	no	no	no	no
YFR013W::chr00_16b	YFR013W	IOC3	0.519765	0.668346	0.273561	0.161038	no	no	no	no
YFR016C::chr6_1	YFR016C	YFR016C	0.463867	0.0272869	0.301663	0.437604	yes	no	yes	no
YFR017C::chr6_1	YFR017C	IGD1	-0.0729015	0.194843	0.607247	0.353901	no	no	no	no
YFR018C::chr6_1	YFR018C	YFR018C	1.30356	0.807712	0.0393531	0.120733	no	no	no	no
YFR020W::chr6_1	YFR020W	YFR020W	-0.503676	-0.497862	0.817949	0.70037	no	no	no	no
YFR023W::chr6_1	YFR023W	PES4	1.05141	0.587242	0.0828281	0.188134	no	no	no	no
YFR024C-A::chr6_1	YFR024C-A	LSB3	0.887518	-0.0839984	0.1262	0.495048	yes	no	yes	no
YFR024C::chr00_15	YFR024C-A	LSB3	-0.812871	-0.535142	0.913663	0.716988	no	no	no	no
YFR025C::chr00_15	YFR025C	HIS2	0.476768	0.0582892	0.295063	0.421782	yes	no	yes	no
YFR026C::chr6_1	YFR026C	ULI1	0.392792	-0.0949404	0.33915	0.500721	no	no	no	no
YFR030W::chr00_15	YFR030W	MET10	1.81656	0.545644	0.00595234	0.203063	yes	no	yes	no
YFR031C-A::chr6_1	YFR031C-A	RPL2A	0.911921	0.751685	0.118893	0.13599	no	no	no	no
YFR032C-A::chr00_2	YFR032C-A	RPL29	-0.628455	-0.83897	0.862503	0.833675	no	no	no	no
YFR034C::chr00_2	YFR034C	PHO4	-1.00021	-3.82254	0.949498	0.999999	no	no	no	no
YFR036W::chr00_2	YFR036W	CDC26	-0.753773	0.310358	0.899109	0.299812	no	no	no	no
YFR038W::chr00_2	YFR038W	IRC5	-0.679357	-0.620783	0.878338	0.753398	no	no	no	no
YFR039C::chr00_14	YFR039C	YFR039C	-0.277054	0.637178	0.716776	0.171134	no	no	no	no
YFR040W::chr00_2	YFR040W	SAP155	0.474365	-0.799998	0.296287	0.820727	no	no	no	no
YFR041C::chr00_2	YFR041C	ERJ5	1.0099	0.611686	0.0925737	0.179686	no	no	no	no
YFR043C::chr00_2	YFR043C	IRC6	-0.345271	0.543302	0.749818	0.203924	no	no	no	no
YFR044C::chr00_2	YFR044C	DUG1	0.290736	-0.85476	0.395797	0.838744	no	no	no	no
YFR045W::chr00_2	YFR045W	YFR045W	-0.319095	-0.0147181	0.737385	0.459198	no	no	no	no
YFR046C::chr00_2	YFR046C	CNN1	-0.542513	-0.620323	0.832693	0.753209	no	no	no	no
YFR047C::chr00_2	YFR047C	BNA6	-0.763082	-0.391154	0.901513	0.650542	no	no	no	no
YFR054C::chr00_2	YFR054C	YFR054C	-0.817452	-1.34415	0.914722	0.947956	no	no	no	no
YFR055W::chr00_2	YFR055W	IRC7	-0.275841	0.102821	0.71617	0.399279	no	no	no	no
YFR057W::chr00_2	YFR057W	YFR057W	-1.82216	0.498052	0.997831	0.220983	no	no	no	no
YGL002W::chr7_1	YGL002W	ERP6	-1.31572	-0.194263	0.982372	0.55207	no	no	no	no
YGL004C::chr7_1	YGL004C	RPN14	-0.477991	-0.331996	0.807765	0.621681	no	no	no	no
YGL005C::chr7_1	YGL005C	COG7	-0.335792	0.959746	0.745352	0.085512	no	yes	no	yes
YGL010W::chr7_1	YGL010W	YGL010W	-0.276512	0.173588	0.716506	0.364225	no	no	no	no
YGL015C::chr7_1	YGL015C	YGL015C	-0.230534	-0.347158	0.693105	0.62915	no	no	no	no
YGL017W::chr7_1	YGL017W	ATE1	0.332452	-0.661352	0.372297	0.769727	no	no	no	no
YGL023C::chr7_1	YGL023C	PIB2	-0.610859	0.140033	0.856716	0.380725	no	no	no	no
YGL025C::chr7_1	YGL025C	PGD1	-0.177502	0.913551	0.665108	0.0952869	no	no	no	no
YGL026C::chr7_1	YGL026C	TRP5	-0.290812	1.82175	0.723605	0.00640101	no	no	no	no
YGL027C::chr7_1	YGL027C	CWH41	-0.746014	0.16587	0.897072	0.367999	no	no	no	no
YGL042C::chr7_1	YGL042C	YGL042C	-0.522568	-1.16196	0.82522	0.917517	no	no	no	no
YGL050W::chr7_1	YGL050W	TYW3	-0.88075	-0.579415	0.928374	0.736129	no	no	no	no
YGL051W::chr7_1	YGL051W	MST27	-0.960192	-0.718545	0.943058	0.791684	no	no	no	no
YGL053W::chr7_1	YGL053W	PRM8	-1.06158	-0.684424	0.958232	0.778736	no	no	no	no
YGL056C::chr7_1	YGL056C	SDS23	0.13091	-0.832704	0.488637	0.831635	no	no	no	no
YGL059W::chr7_1	YGL059W	PKP2	0.462118	0.205856	0.302562	0.348592	no	no	no	no
YGL063W::chr7_1	YGL063W	PUS2	-0.475481	-1.00942	0.806751	0.883038	no	no	no	no
YGL066W::chr7_1	YGL066W	SGF73	0.574039	2.31397	0.247576	0.000877177	no	no	no	yes
YGL067W::chr7_1	YGL067W	NPY1	-0.65051	-0.622433	0.869529	0.754074	no	no	no	no
YGL071W::chr7_1	YGL071W	AFT1	0.418432	-0.240525	0.325417	0.575744	no	no	no	no
YGL072C::chr7_1	YGL072C	YGL072C	0.347038	0.0293543	0.364186	0.436546	no	no	no	no
YGL078C::chr7_1	YGL078C	DBP3	-0.531089	0.646478	0.828438	0.16808	no	no	no	no
YGL080W::chr7_1	YGL080W	FMP37	0.406626	0.138424	0.331713	0.381522	no	no	no	no
YGL082W::chr7_1	YGL082W	YGL082W	-0.102514	-0.215042	0.623935	0.562731	no	no	no	no
YGL083W::chr7_1	YGL083W	SCY1	0.274222	-0.0855223	0.405211	0.495838	no	no	no	no
YGL084C::chr7_1	YGL084C	GUP1	0.85816	1.45167	0.135397	0.0223079	no	no	no	no
YGL085W::chr7_1	YGL085W	LCL3	-0.476087	-0.303627	0.806996	0.607584	no	no	no	no
YGL087C::chr7_1	YGL087C	MMS2	0.028846	0.418882	0.548576	0.252711	no	no	no	no
YGL090W::chr7_1	YGL090W	LIF1	-0.189076	-0.0804218	0.671304	0.493194	no	no	no	no
YGL101W::chr7_2	YGL101W	YGL101W	0.908909	0.250437	0.119778	0.327414	no	no	no	no
YGL107C::chr7_2	YGL107C	RMD9	0.332828	0.332828	0.372087	0.28974	yes	yes	yes	yes
YGL108C::chr7_2	YGL108C	YGL108C	-0.0626971	0.249086	0.601449	0.328049	no	no	no	no
YGL114W::chr7_2	YGL114W	YGL114W	0.992984	-0.0332502	0.0967812	0.468768	no	no	no	no
YGL115W::chr7_2	YGL115W	SNF4	0.465779	-1.10969	0.30068	0.906689	no	no	no	no
YGL117W::chr7_2	YGL117W	YGL117W	-0.247434	1.46387	0.701805	0.0214797	no	yes	no	yes
YGL121C::chr7_2	YGL121C	GPG1	-0.155898	-0.0898842	0.653422	0.4981	no	no	no	no
YGL125W::chr7_2	YGL125W	MET13	-0.329265	-0.166088	0.742253	0.537555	no	no	no	no
YGL127C::chr7_2	YGL127C	SOH1	-0.0944304	1.05458	0.619401	0.0678274	no	yes	no	yes
YGL131C::chr7_2	YGL131C	SNT2	-0.792272	-1.29864	0.90878	0.941349	no	no	no	no
YGL132W::chr7_2	YGL132W	YGL132W	-0.78138	-0.155444	0.906116	0.532057	no	no	no	no
YGL140C::chr7_2	YGL140C	YGL140C	-0.326029	-0.574099	0.740709	0.733866	no	no	no	no
YGL141W::chr7_2	YGL141W	HUL5	-0.93042	-0.35716	0.93786	0.634051	no	no	no	no
YGL143C::chr7_2	YGL143C	MRF1	0.202361	1.63091	0.446748	0.0125065	no	yes	no	yes
YGL144C::chr7_2	YGL144C	ROG1	-0.354811	-0.745922	0.75427	0.801742	no	no	no	no
YGL146C::chr7_2	YGL146C	RRT6	-0.98086	0.484254	0.94646	0.226343	no	no	no	no
YGL148W::chr7_2	YGL148W	ARO2	-0.241948	1.34689	0.698994	0.0305978	no	no	no	no
YGL149W::chr7_2	YGL149W	YGL149W	0.413215	0.990056	0.328193	0.0795191	no	yes	no	yes
YGL151W::chr7_2	YGL151W	NUT1	0.156978	-0.77425	0.473315	0.811834	yes	no	yes	no
YGL152C::chr7_2	YGL152C	YGL152C	-0.405731	-0.0460935	0.777298	0.47541	no	no	no	no
YGL153W::chr7_2	YGL153W	PEX14	0.350203	0.34018	0.362434	0.286479	no	no	no	no
YGL154C::chr7_2	YGL154C	LYS5	0.0642805	-0.510762	0.527822	0.706171	no	no	no	no
YGL156W::chr7_2	YGL156W	AMS1	-0.536409	-0.548242	0.830428	0.722721	no	no	no	no
YGL157W::chr7_2	YGL157W	ARI1	-0.71561	-0.624895	0.888804	0.755081	no	no	no	no
YGL158W::chr7_2	YGL158W	RCK1	-0.684899	-1.21601	0.879981	0.927692	no	no	no	no
YGL159W::chr7_2	YGL159W	YGL159W	0.327985	-0.409199	0.374792	0.659184	no	no	no	no
YGL160W::chr7_2	YGL160W	AIM14	0.116406	-0.595931	0.49717	0.743097	no	no	no	no
YGL161C::chr7_2	YGL161C	YIP5	-1.05123	-1.53493	0.956851	0.969486	no	no	no	no
YGL162W::chr7_2	YGL162W	SUT1	-1.19373	-0.392655	0.972914	0.651264	no	no	no	no
YGL163C::chr7_2	YGL163C	RAD54	0.651529	0.287466	0.212888	0.310234	no	no	no	no
YGL164C::chr7_2	YGL164C	YRB30	-0.748599	-1.27278	0.897754	0.937311	no	no	no	no
YGL165C::chr7_2	YGL165C	YGL165C	-0.3523	-0.346066	0.753103	0.628614	no	no	no	no
YGL166W::chr7_2	YGL166W	CUP2	-0.365036	-0.236684	0.758995	0.573788	no	no	no	no
YGL167C::chr7_2	YGL167C	PMR1	0.739772	2.27612	0.177066	0.00103584	no	no	no	no
YGL168W::chr7_2	YGL168W	HUR1	-0.0265707	3.01634	0.580749	2.65231e-05	no	no	no	yes
YGL170C::chr7_2	YGL170C	SPO74	-0.00313793	-1.44139	0.567198	0.96009	no	no	no	no
YGL175C::chr7_2	YGL175C	SAE2	-0.677784	-0.294917	0.877869	0.603227	no	no	no	no
YGL176C::chr7_2	YGL176C	YGL176C	-0.539082	-1.22138	0.831423	0.928648	no	no	no	no
YGL177W::chr7_2	YGL177W	YGL177W	1.03532	-0.881654	0.0865114	0.847145	no	no	no	no
YGL179C::chr7_2	YGL179C	TOS3	0.579174	-0.155535	0.245188	0.532104	no	no	no	no
YGL180W::chr7_2	YGL180W	ATG1	-0.329095	-0.571833	0.742172	0.732899	no	no	no	no
YGL181W::chr7_2	YGL181W	GTS1	-0.571061	-1.96629	0.843026	0.992532	no	no	no	no
YGL194C::chr7_3	YGL194C	HOS2	0.927172	1.4222	0.114481	0.0244222	no	no	no	no
YGL203C::chr7_3	YGL203C	KEX1	-0.263687	0.135445	0.710065	0.382999	no	yes	no	yes
YGL205W::chr7_3	YGL205W	POX1	0.214031	-0.943333	0.439949	0.865296	no	no	no	no
YGL209W::chr7_3	YGL209W	MIG2	0.810526	0.781072	0.151277	0.127831	no	no	no	no
YGL210W::chr7_3	YGL210W	YPT32	0.741114	0.623276	0.176552	0.175765	no	no	no	no
YGL213C::chr7_3	YGL213C	SKI8	1.0168	0.861357	0.0908982	0.107294	yes	no	yes	no
YGL215W::chr7_3	YGL215W	CLG1	0.973146	1.86417	0.101891	0.00547383	no	no	no	no
YGL216W::chr7_3	YGL216W	KIP3	1.07637	1.28715	0.0773513	0.036372	no	no	no	no
YGL217C::chr7_3/chr00_12	YGL217C	YGL217C	1.27055	1.39198	0.0436747	0.0267613	no	no	no	no
YGL220W::chr7_3	YGL220W	FRA2	0.516589	-0.0141189	0.275123	0.458889	no	no	no	no
YGL222C::chr7_3	YGL222C	EDC1	-0.299342	0.619562	0.727798	0.177015	no	no	no	no
YGL227W::chr7_3	YGL227W	VID30	0.352731	0.451961	0.361036	0.23917	no	no	no	no
YGL229C::chr7_3	YGL229C	SAP4	1.13273	1.13273	0.0660015	0.055497	yes	yes	yes	yes
YGL230C::chr7_3	YGL230C	YGL230C	1.74905	0.795019	0.00785973	0.124079	yes	no	yes	no
YGL231C::chr7_3	YGL231C	EMC4	-0.137087	1.2134	0.643127	0.044699	no	no	no	no
YGL232W::chr7_3	YGL232W	TAN1	0.289691	0.039304	0.39639	0.431458	no	no	no	no
YGL235W::chr7_3/chr00_12	YGL235W	YGL235W	0.860852	1.69158	0.134535	0.010169	no	no	no	no
YGL236C::chr7_3	YGL236C	MTO1	0.926494	1.12727	0.114675	0.0562962	no	no	no	no
YGL242C::chr7_3	YGL242C	YGL242C	0.260072	-1.23813	0.413321	0.931567	yes	no	yes	no
YGL243W::chr7_3	YGL243W	TAD1	1.76259	1.58055	0.00743903	0.014787	no	no	no	no
YGL250W::chr7_3	YGL250W	RMR1	0.65381	-0.866631	0.211912	0.842489	yes	no	yes	no
YGL251C::chr7_3	YGL251C	HFM1	1.22237	0.090217	0.0506609	0.405617	no	no	no	no
YGL253W::chr7_3	YGL253W	HXK2	-0.125859	0.678645	0.636931	0.157789	no	no	no	no
YGL254W::chr7_3	YGL254W	FZF1	-0.857042	-1.25645	0.923472	0.934652	no	no	no	no
YGL256W::chr7_3	YGL256W	ADH4	0.0723672	-0.194978	0.523073	0.552437	no	no	no	no
YGL257C::chr7_3	YGL257C	MNT2	-1.22068	-0.826932	0.975305	0.829741	no	no	no	no
YGL258W::chr7_3	YGL258W	VEL1	-0.0545843	-0.472378	0.596823	0.688763	no	no	no	no
YGL259W::chr7_3	YGL259W	YPS5	-0.133564	0.343434	0.641187	0.285042	no	no	no	no
YGL260W::chr7_3	YGL260W	YGL260W	-0.330523	-0.700703	0.742852	0.78497	no	no	no	no
YGL261C::chr7_3	YGL261C	PAU11	0.687764	-0.0868662	0.197693	0.496535	no	no	no	no
YGL262W::chr7_3	YGL262W	YGL262W	0.608809	0.089536	0.23165	0.405961	no	no	no	no
YGL263W::chr7_3	YGL263W	COS12	0.846344	0.0777542	0.139225	0.411909	no	no	no	no
YGR003W::chr7_3	YGR003W	CUL3	0.434617	0.47918	0.316867	0.228332	no	no	no	no
YGR004W::chr7_3	YGR004W	PEX31	0.964775	0.679427	0.104105	0.157544	no	no	no	no
YGR007W::chr7_3	YGR007W	ECT1	0.725959	0.580412	0.182407	0.190537	no	no	no	no
YGR011W::chr7_3/chr00_12	YGR011W	YGR011W	0.423307	0.24647	0.322831	0.329278	no	no	no	no
YGR012W::chr7_3	YGR012W	YGR012W	-0.796893	-0.468849	0.909893	0.68714	no	no	no	no
YGR014W::chr7_3	YGR014W	MSB2	0.312822	0.265544	0.383301	0.320358	no	no	no	no
YGR015C::chr7_3	YGR015C	YGR015C	0.0785067	0.0262314	0.519465	0.438145	no	no	no	no
YGR019W::chr7_3	YGR019W	UGA1	0.991746	0.486077	0.0970945	0.22563	no	no	no	no
YGR021W::chr7_3	YGR021W	YGR021W	-1.37787	-0.388318	0.985992	0.649176	no	no	no	no
YGR022C::chr7_3/chr00_12	YGR022C	YGR022C	0.308206	-0.182725	0.385903	0.546133	no	no	no	no
YGR023W::chr7_3	YGR023W	MTL1	0.00680892	0.173205	0.561421	0.364413	no	no	no	no
YGR025W::chr7_3/chr00_12	YGR025W	YGR025W	0.276789	-0.257554	0.403743	0.584395	no	no	no	no
YGR026W::chr7_3	YGR026W	YGR026W	0.913679	-0.263893	0.118378	0.587605	no	no	no	no
YGR027C::chr7_4	YGR027C	RPS25A	-1.27949	0.906085	0.979913	0.0969411	no	no	no	no
YGR028W::chr00_14	YGR028W	MSP1	-0.930355	-1.10332	0.937849	0.905301	no	no	no	no
YGR031W::chr7_4	YGR031W	IMO32	0.332054	-0.484833	0.372519	0.69446	no	no	no	no
YGR032W::chr00_14	YGR032W	GSC2	-1.1527	-1.00927	0.968905	0.883001	no	no	no	no
YGR033C::chr7_4	YGR033C	TIM21	-0.0394854	-0.3695	0.588178	0.640068	no	no	no	no
YGR034W::chr7_4	YGR034W	RPL26B	-0.0261562	0.0541363	0.58051	0.423894	no	no	no	no
YGR035C::chr7_4	YGR035C	YGR035C	0.0549551	-0.788186	0.533294	0.816681	no	no	no	no
YGR036C::chr7_4	YGR036C	CAX4	1.28297	2.27246	0.0420066	0.00105255	no	yes	no	yes
YGR037C::chr7_4	YGR037C	ACB1	0.0746435	1.42878	0.521736	0.0239363	no	no	no	no
YGR038W::chr00_14	YGR038W	ORM1	-0.199614	0.436796	0.676905	0.245328	no	no	no	no
YGR039W::chr7_4	YGR039W	YGR039W	-0.454553	-0.88677	0.798174	0.848709	no	no	no	no
YGR040W::chr00_14	YGR040W	KSS1	0.00920699	-0.0697194	0.560026	0.487646	no	no	no	no
YGR041W::chr7_4	YGR041W	BUD9	-1.11315	-0.988311	0.964588	0.877561	no	no	no	no
YGR042W::chr7_4	YGR042W	YGR042W	-0.646854	-0.332764	0.868382	0.62206	no	no	no	no
YGR043C::chr7_4	YGR043C	NQM1	-0.27788	-0.976237	0.717189	0.874348	no	no	no	no
YGR044C::chr7_4	YGR044C	RME1	-0.803531	-0.658708	0.911474	0.768681	no	no	no	no
YGR045C::chr7_4	YGR045C	YGR045C	0.00971597	-0.831143	0.55973	0.831124	no	no	no	no
YGR050C::chr00_14	YGR050C	YGR050C	-0.952049	-0.297021	0.941672	0.60428	no	no	no	no
YGR051C::chr7_4	YGR051C	YGR051C	-0.131336	-0.584131	0.639958	0.738129	no	no	no	no
YGR052W::chr7_4	YGR052W	FMP48	0.0504574	-0.132006	0.535931	0.519931	no	no	no	no
YGR053C::chr00_14	YGR053C	YGR053C	-0.0701212	0.319031	0.605669	0.295906	no	no	no	no
YGR054W::chr7_4	YGR054W	YGR054W	-0.668412	-1.76178	0.875046	0.984925	no	no	no	no
YGR055W::chr7_4	YGR055W	MUP1	-0.519013	-0.178359	0.823866	0.543884	no	no	no	no
YGR057C::chr7_4	YGR057C	LST7	0.840324	-0.0620958	0.141204	0.483696	no	no	no	no
YGR063C::chr00_14	YGR063C	SPT4	-0.0897676	0.63587	0.616778	0.171566	no	no	no	no
YGR064W::chr7_4	YGR064W	YGR064W	0.308311	0.565749	0.385844	0.195761	no	no	no	no
YGR066C::chr7_4	YGR066C	YGR066C	-0.552409	-0.810775	0.836324	0.824369	no	no	no	no
YGR067C::chr7_4	YGR067C	YGR067C	-1.71367	-0.954551	0.996453	0.868431	no	no	no	no
YGR069W::chr7_4	YGR069W	YGR069W	-0.991426	0.0295009	0.948136	0.436471	no	no	no	no
YGR071C::chr7_4	YGR071C	ENV11	0.0343883	-0.564999	0.545338	0.72997	no	no	no	no
YGR072W::chr7_4	YGR072W	UPF3	0.252979	-2.42807	0.4174	0.998794	no	no	no	no
YGR078C::chr7_4	YGR078C	PAC10	0.124557	0.124557	0.492374	0.388411	yes	yes	yes	yes
YGR079W::chr7_4	YGR079W	YGR079W	0.168469	-1.05931	0.466572	0.895288	no	no	no	no
YGR084C::chr7_4	YGR084C	MRP13	-0.038205	-0.669164	0.587442	0.7728	no	no	no	no
YGR085C::chr7_4	YGR085C	RPL11B	1.13149	-0.807848	0.0662372	0.823385	no	no	no	no
YGR086C::chr00_14	YGR086C	PIL1	-0.477818	-0.773561	0.807695	0.811593	no	no	no	no
YGR087C::chr7_4	YGR087C	PDC6	-0.683721	-0.945137	0.879634	0.865803	no	no	no	no
YGR093W::chr00_14	YGR093W	YGR093W	-0.962871	0.120332	0.943508	0.390517	no	no	no	no
YGR097W::chr7_4	YGR097W	ASK10	-1.13921	-1.07759	0.967484	0.899537	no	no	no	no
YGR101W::chr7_4	YGR101W	PCP1	0.364997	2.10401	0.354283	0.00214457	no	no	no	no
YGR102C::chr7_4	YGR102C	GTF1	0.0616505	2.01876	0.529366	0.00302308	no	no	no	no
YGR104C::chr7_4	YGR104C	SRB5	1.13815	1.13815	0.0649812	0.0547117	yes	yes	yes	yes
YGR106C::chr00_14	YGR106C	VOA1	-0.893898	-0.256613	0.930987	0.583918	no	no	no	no
YGR107W::chr7_4	YGR107W	YGR107W	0.214115	-0.970297	0.439901	0.872746	no	no	no	no
YGR111W::chr7_4	YGR111W	YGR111W	-0.455131	-0.757489	0.798414	0.805902	no	no	no	no
YGR112W::chr7_4	YGR112W	SHY1	-0.593936	0.0437739	0.850996	0.429176	no	no	no	no
YGR117C::chr00_14	YGR117C	YGR117C	-0.470999	-0.784233	0.804933	0.815314	no	no	no	no
YGR118W::chr7_4	YGR118W	RPS23A	1.52711	2.09381	0.0183992	0.00223588	no	no	no	no
YGR122C-A::chr00_17a	YGR122C-A	YGR122C-A	0.481042	0.0516755	0.292891	0.425147	yes	no	yes	no
YGR124W::chr7_5	YGR124W	ASN2	-0.74822	-0.880954	0.897654	0.84693	no	no	no	no
YGR125W::chr7_5	YGR125W	YGR125W	-0.00498689	-0.391101	0.56827	0.650516	no	no	no	no
YGR126W::chr7_5	YGR126W	YGR126W	-0.295533	0.1608	0.72593	0.370486	no	no	no	no
YGR127W::chr7_5	YGR127W	YGR127W	-0.0754473	-0.0170271	0.60869	0.460389	no	no	no	no
YGR129W::chr7_5	YGR129W	SYF2	-0.559775	-0.706503	0.838993	0.787167	no	no	no	no
YGR130C::chr7_5	YGR130C	YGR130C	-0.514715	-0.880345	0.82222	0.846743	no	no	no	no
YGR131W::chr7_5	YGR131W	FHN1	-0.472053	-0.451923	0.805362	0.679307	no	no	no	no
YGR132C::chr7_5	YGR132C	PHB1	-0.780624	-0.901604	0.905929	0.853185	no	no	no	no
YGR133W::chr7_5	YGR133W	PEX4	0.932283	-0.62305	0.113029	0.754326	no	no	no	no
YGR137W::chr7_5	YGR137W	YGR137W	-1.80847	-1.57088	0.997689	0.972573	no	no	no	no
YGR139W::chr7_5	YGR139W	YGR139W	-0.61543	-0.808134	0.858235	0.823481	no	no	no	no
YGR141W::chr7_5	YGR141W	VPS62	-0.824997	-0.0424402	0.916445	0.47352	no	no	no	no
YGR142W::chr7_5	YGR142W	BTN2	1.13545	0.807165	0.0654893	0.120876	yes	no	yes	no
YGR143W::chr7_5	YGR143W	SKN1	-0.724092	-1.13909	0.891157	0.912901	no	no	no	no
YGR148C::chr7_5	YGR148C	RPL24B	0.342771	0.199721	0.366552	0.351546	no	no	no	no
YGR149W::chr7_5	YGR149W	YGR149W	-0.665777	-0.487401	0.874245	0.695629	no	no	no	no
YGR152C::chr7_5	YGR152C	RSR1	-0.32143	-0.0929025	0.738507	0.499665	no	no	no	no
YGR157W::chr7_5	YGR157W	CHO2	0.832382	0.759001	0.143843	0.133926	no	no	no	no
YGR161C::chr7_5	YGR161C	RTS3	0.666334	-0.568434	0.206599	0.731444	no	no	no	no
YGR166W::chr7_5	YGR166W	TRS65	-1.79652	0.167626	0.997558	0.36714	no	yes	no	yes
YGR168C::chr7_5	YGR168C	YGR168C	-0.566871	-0.965796	0.841537	0.871523	no	no	no	no
YGR170W::chr7_5	YGR170W	PSD2	-0.826621	-0.56732	0.916812	0.730966	no	no	no	no
YGR173W::chr7_5	YGR173W	RBG2	-0.431555	-0.0535907	0.78849	0.479291	no	no	no	no
YGR174C::chr7_5	YGR174C	CBP4	0.35221	1.0988	0.361324	0.060613	no	no	no	no
YGR176W::chr7_5	YGR176W	YGR176W	-0.0358809	0.0390293	0.586107	0.431598	no	no	no	no
YGR177C::chr7_5	YGR177C	ATF2	0.568954	-1.03286	0.249954	0.888915	no	no	no	no
YGR178C::chr7_5	YGR178C	PBP1	0.934707	-0.999105	0.112345	0.880384	no	no	no	no
YGR182C::chr7_5	YGR182C	YGR182C	-1.36127	-0.382355	0.985094	0.646299	no	no	no	no
YGR184C::chr7_5	YGR184C	UBR1	0.531509	-0.766721	0.267826	0.809183	no	no	no	no
YGR192C::chr7_5	YGR192C	TDH3	-0.932378	0.473535	0.938213	0.230557	no	no	no	no
YGR193C::chr7_5	YGR193C	PDX1	1.15698	0.962715	0.0615347	0.0849104	yes	no	yes	no
YGR194C::chr7_5	YGR194C	XKS1	-0.0466429	0.33491	0.592281	0.288815	no	no	no	no
YGR196C::chr7_5	YGR196C	FYV8	-0.619653	-1.62439	0.859628	0.976681	no	no	no	no
YGR197C::chr7_5	YGR197C	SNG1	-0.0369248	-0.559738	0.586707	0.727704	no	no	no	no
YGR199W::chr7_5	YGR199W	PMT6	0.111535	-0.0671832	0.500037	0.486332	no	no	no	no
YGR200C::chr7_5	YGR200C	ELP2	-0.488588	1.32609	0.812008	0.0325159	no	no	no	no
YGR201C::chr00_10	YGR201C	YGR201C	0.459541	0.265278	0.303891	0.320482	yes	no	yes	no
YGR202C::chr7_5	YGR202C	PCT1	-0.336159	-0.515996	0.745526	0.708509	no	no	no	no
YGR203W::chr7_5	YGR203W	YCH1	0.65381	-0.320187	0.211912	0.615831	yes	no	yes	no
YGR204W::chr00_10	YGR204W	ADE3	-0.459283	1.32421	0.800132	0.032694	no	no	no	no
YGR205W::chr7_5	YGR205W	TDA10	-0.707226	-1.40789	0.886443	0.956199	no	no	no	no
YGR206W::chr7_5	YGR206W	MVB12	1.13545	-1.64094	0.0654893	0.977841	yes	no	yes	no
YGR207C::chr7_5	YGR207C	CIR1	0.260491	-0.628004	0.41308	0.756349	no	no	no	no
YGR210C::chr00_8	YGR210C	YGR210C	-0.542297	-0.387568	0.832614	0.648815	no	no	no	no
YGR212W::chr7_5	YGR212W	SLI1	0.639268	0.127896	0.21818	0.386749	no	no	no	no
YGR213C::chr7_5	YGR213C	RTA1	0.153184	-0.529206	0.475543	0.714372	no	no	no	no
YGR215W::chr7_5	YGR215W	RSM27	0.119972	2.49299	0.495072	0.00038744	no	no	no	yes
YGR220C::chr00_2	YGR220C	MRPL9	1.06637	2.06748	0.0795109	0.00248788	no	no	no	no
YGR221C::chr00_2	YGR221C	TOS2	-0.327645	-0.474757	0.741481	0.689854	no	no	no	no
YGR224W::chr00_2	YGR224W	AZR1	-0.933382	-0.998185	0.938393	0.880145	no	no	no	no
YGR225W::chr00_2	YGR225W	AMA1	-0.0627784	-0.867964	0.601495	0.842906	no	no	no	no
YGR226C::chr00_2	YGR226C	YGR226C	0.812033	0.783928	0.150756	0.127056	no	no	no	no
YGR227W::chr00_2	YGR227W	DIE2	0.0270576	-0.432404	0.549621	0.670174	no	no	no	no
YGR228W::chr00_2	YGR228W	YGR228W	-0.482952	-0.173543	0.809758	0.541401	no	no	no	no
YGR229C::chr00_2	YGR229C	SMI1	0.0087528	2.04411	0.56029	0.00273289	no	no	no	no
YGR231C::chr00_2	YGR231C	PHB2	0.273594	0.108998	0.405569	0.396182	no	no	no	no
YGR232W::chr00_2	YGR232W	NAS6	0.89249	0.847177	0.124686	0.110736	no	no	no	no
YGR233C::chr00_2	YGR233C	PHO81	1.50649	-2.33215	0.0198153	0.998189	no	no	no	no
YGR234W::chr00_2	YGR234W	YHB1	0.164828	-0.828143	0.468708	0.83014	no	no	no	no
YGR235C::chr00_2	YGR235C	MOS2	1.66407	1.02975	0.0110103	0.0721582	no	no	no	no
YGR236C::chr00_2	YGR236C	SPG1	-0.548899	-0.725577	0.835042	0.794296	no	no	no	no
YGR238C::chr00_14	YGR238C	KEL2	-0.874414	-0.902747	0.927088	0.853526	no	no	no	no
YGR241C::chr00_2	YGR241C	YAP1802	-0.365709	-0.599181	0.759304	0.744457	no	no	no	no
YGR242W::chr00_2	YGR242W	YGR242W	-0.854676	-0.342075	0.922969	0.626651	no	no	no	no
YGR243W::chr00_2	YGR243W	FMP43	-0.468559	-0.849868	0.803939	0.837185	no	no	no	no
YGR247W::chr00_2	YGR247W	CPD1	0.246561	0.274348	0.4211	0.316275	no	no	no	no
YGR248W::chr00_14	YGR248W	SOL4	-0.626897	-1.40114	0.861997	0.955379	no	no	no	no
YGR249W::chr00_2	YGR249W	MGA1	-0.227891	-0.0894215	0.691734	0.49786	no	no	no	no
YGR250C::chr00_14	YGR250C	YGR250C	-0.347513	-0.0137481	0.750868	0.458698	no	no	no	no
YGR256W::chr00_3	YGR256W	GND2	0.344686	0.556462	0.36549	0.199114	no	no	no	no
YGR257C::chr00_17a	YGR257C	MTM1	1.38623	3.2004	0.0300416	9.30279e-06	no	yes	no	yes
YGR259C::chr00_3	YGR259C	YGR259C	-0.356807	-0.76579	0.755196	0.808854	no	no	no	no
YGR260W::chr00_3	YGR260W	TNA1	1.23245	0.79947	0.0491309	0.122899	yes	no	yes	no
YGR266W::chr00_3	YGR266W	YGR266W	-0.938995	-1.15054	0.939394	0.915235	no	no	no	no
YGR268C::chr00_3	YGR268C	HUA1	-0.567255	-0.763536	0.841674	0.808055	no	no	no	no
YGR269W::chr00_3	YGR269W	YGR269W	-0.12791	0.159045	0.638065	0.371348	no	no	no	no
YGR273C::chr00_17a	YGR273C	YGR273C	-0.0752356	0.164239	0.60857	0.368799	no	no	no	no
YGR276C::chr00_17a	YGR276C	RNH70	0.372945	-0.475729	0.349931	0.6903	no	no	no	no
YGR281W::chr00_3	YGR281W	YOR1	0.160108	-0.631791	0.471478	0.757889	no	no	no	no
YGR282C::chr00_3	YGR282C	BGL2	-0.447468	0.738082	0.795219	0.139885	no	no	no	no
YGR286C::chr00_3	YGR286C	BIO2	-0.205486	-0.363076	0.680009	0.63694	no	no	no	no
YGR288W::chr00_3	YGR288W	MAL13	0.804647	0.341845	0.153319	0.285743	no	no	no	no
YGR291C::chr00_17a	YGR291C	YGR291C	0.671244	0.0539427	0.204538	0.423993	no	no	no	no
YGR295C::chr00_17b	YGR295C	COS6	1.20374	-0.221318	0.0535902	0.565943	no	no	no	no
YHL002W::chr00_10	YHL002W	HSE1	0.29918	0.824394	0.391006	0.116433	no	no	no	no
YHL003C::chr8_1	YHL003C	LAG1	-1.14046	-0.70654	0.967618	0.78718	no	no	no	no
YHL005C::chr8_1	YHL005C	YHL005C	0.656452	0.23797	0.210785	0.333284	no	no	no	no
YHL007C::chr8_1	YHL007C	STE20	-0.458432	-1.23498	0.799781	0.931024	no	no	no	no
YHL009C::chr8_1	YHL009C	YAP3	0.634442	-1.10115	0.220284	0.904824	no	no	no	no
YHL012W::chr8_1	YHL012W	YHL012W	-0.675705	-1.1228	0.877247	0.909498	no	no	no	no
YHL013C::chr8_1	YHL013C	OTU2	0.0454031	-0.250988	0.538892	0.581064	no	no	no	no
YHL016C::chr8_1	YHL016C	DUR3	0.395952	0.442567	0.337446	0.242974	no	no	no	no
YHL017W::chr8_1	YHL017W	YHL017W	-0.555001	0.673148	0.837266	0.159518	no	no	no	no
YHL019C::chr8_1	YHL019C	APM2	-0.571523	-0.470172	0.84319	0.687749	no	no	no	no
YHL020C::chr8_1	YHL020C	OPI1	-0.0276715	0.708022	0.581383	0.14876	no	no	no	no
YHL022C::chr8_1	YHL022C	SPO11	0.251449	-0.613012	0.418282	0.750201	no	no	no	no
YHL023C::chr8_1	YHL023C	NPR3	0.698443	0.161549	0.193343	0.370118	no	no	no	no
YHL024W::chr00_8	YHL024W	RIM4	0.969986	0.868056	0.102723	0.105694	no	no	no	no
YHL028W::chr8_1	YHL028W	WSC4	-0.409777	-0.786699	0.779074	0.816167	no	no	no	no
YHL029C::chr8_1	YHL029C	OCA5	0.944349	0.643475	0.109654	0.169062	yes	no	yes	no
YHL031C::chr8_1	YHL031C	GOS1	0.784185	1.78081	0.16057	0.00742482	no	no	no	no
YHL032C::chr8_1	YHL032C	GUT1	0.0880783	-0.24346	0.513838	0.577238	no	no	no	no
YHL033C::chr8_1	YHL033C	RPL8A	1.44649	-0.858337	0.024473	0.839879	yes	no	yes	no
YHL036W::chr8_1	YHL036W	MUP3	-0.585024	-0.943534	0.847924	0.865352	no	no	no	no
YHL037C::chr8_1	YHL037C	YHL037C	0.315499	0.253031	0.381795	0.326198	no	no	no	no
YHL038C::chr8_1	YHL038C	CBP2	0.574587	1.34742	0.247321	0.0305508	no	no	no	no
YHL039W::chr00_10	YHL039W	EFM1	-0.538108	-0.0227415	0.831061	0.463339	no	no	no	no
YHL041W::chr8_1	YHL041W	YHL041W	0.611544	0.132425	0.230421	0.384498	yes	no	yes	no
YHL043W::chr8_1	YHL043W	ECM34	-0.506056	-0.594171	0.818875	0.742359	no	no	no	no
YHL044W::chr8_1	YHL044W	YHL044W	-0.951571	-0.934488	0.941589	0.862788	no	no	no	no
YHL045W::chr8_1	YHL045W	YHL045W	-0.0812231	-0.900033	0.611958	0.852715	no	no	no	no
YHL046C::chr8_1	YHL046C	PAU13	1.09975	0.437188	0.0724746	0.245168	yes	no	yes	no
YHL047C::chr8_1	YHL047C	ARN2	-0.00119488	0.0969046	0.56607	0.402251	no	no	no	no
YHR001W-A::chr8_1	YHR001W-A	QCR10	-0.321408	-0.5726	0.738496	0.733226	no	no	no	no
YHR003C::chr00_10	YHR003C	YHR003C	-0.755359	-1.12462	0.899521	0.909883	no	no	no	no
YHR004C::chr00_10	YHR004C	NEM1	-0.0768234	2.40005	0.609469	0.000595929	no	no	no	yes
YHR006W::chr00_10	YHR006W	STP2	0.208409	-1.22523	0.443223	0.929326	no	no	no	no
YHR008C::chr00_10	YHR008C	SOD2	0.075798	1.50849	0.521057	0.0186667	no	no	no	no
YHR009C::chr00_10	YHR009C	TDA3	-0.766946	-1.28548	0.902498	0.939322	no	no	no	no
YHR012W::chr8_1	YHR012W	VPS29	0.830897	0.885135	0.14434	0.101695	no	no	no	no
YHR013C::chr8_1	YHR013C	ARD1	1.05557	1.87782	0.0818953	0.00520197	no	yes	no	yes
YHR017W::chr00_8	YHR017W	YSC83	-0.963572	-0.757948	0.943626	0.806066	no	no	no	no
YHR018C::chr8_1	YHR018C	ARG4	-0.3509	-0.515211	0.75245	0.708159	no	no	no	no
YHR021W-A::chr00_3	YHR021W-A	ECM12	-0.531597	-1.01128	0.828629	0.883514	no	no	no	no
YHR022C::chr8_1	YHR022C	YHR022C	0.225437	-0.311803	0.433322	0.611662	no	no	no	no
YHR028C::chr8_1	YHR028C	DAP2	0.95668	0.481057	0.106279	0.227595	yes	no	yes	no
YHR031C::chr8_1	YHR031C	RRM3	0.286136	0.667951	0.398413	0.161163	no	no	no	no
YHR032W::chr00_8	YHR032W	ERC1	-0.640775	-1.0769	0.866459	0.899378	no	no	no	no
YHR033W::chr8_1	YHR033W	YHR033W	0.658638	0.351502	0.209854	0.281492	no	no	no	no
YHR034C::chr8_1	YHR034C	PIH1	0.041949	-0.980097	0.540914	0.875382	no	no	no	no
YHR035W::chr8_1	YHR035W	YHR035W	-0.889369	-0.809653	0.930096	0.823992	no	no	no	no
YHR037W::chr8_1	YHR037W	PUT2	0.573402	0.997613	0.247873	0.0780757	no	no	no	no
YHR038W::chr8_1	YHR038W	RRF1	1.66344	2.47355	0.0110371	0.000424434	no	yes	no	yes
YHR041C::chr00_10	YHR041C	SRB2	0.673277	3.50342	0.203688	1.47107e-06	no	no	no	yes
YHR043C::chr8_1	YHR043C	DOG2	0.204427	-0.332255	0.445543	0.621809	no	no	no	no
YHR044C::chr8_1	YHR044C	DOG1	-1.66372	-1.72204	0.995587	0.982848	no	no	no	no
YHR046C::chr8_2	YHR046C	INM1	-0.639496	-0.766292	0.866052	0.809032	no	no	no	no
YHR047C::chr8_2	YHR047C	AAP1	-0.148649	-0.747453	0.649468	0.802296	no	no	no	no
YHR048W::chr8_2	YHR048W	YHK8	-0.93461	-0.106551	0.938613	0.506741	no	no	no	no
YHR049C-A::chr8_2	YHR049C-A	YHR049C-A	0.408228	0.327607	0.330855	0.292066	no	no	no	no
YHR049W::chr8_2	YHR049W	FSH1	0.157481	0.570074	0.47302	0.194211	no	no	no	no
YHR059W::chr00_10	YHR059W	FYV4	1.60986	1.9083	0.0135507	0.00463797	no	yes	no	yes
YHR061C::chr8_2	YHR061C	GIC1	1.34226	-0.157671	0.0347375	0.533207	yes	no	yes	no
YHR067W::chr00_10	YHR067W	HTD2	1.00816	2.46226	0.0930021	0.000447407	no	no	no	yes
YHR073W::chr8_2	YHR073W	OSH3	0.528819	-0.733023	0.269134	0.79704	no	no	no	no
YHR075C::chr8_2	YHR075C	PPE1	0.0206113	-0.961388	0.553383	0.870317	no	no	no	no
YHR077C::chr8_2	YHR077C	NMD2	1.40659	-1.07689	0.0280527	0.899375	yes	no	yes	no
YHR078W::chr8_2	YHR078W	YHR078W	0.538193	-0.842815	0.264589	0.834919	no	no	no	no
YHR082C::chr8_2	YHR082C	KSP1	-0.592076	-1.30382	0.850359	0.942133	no	no	no	no
YHR086W::chr8_2	YHR086W	NAM8	0.455278	-0.809774	0.306093	0.824033	no	no	no	no
YHR092C::chr8_2	YHR092C	HXT4	0.311571	-0.223179	0.384006	0.566894	no	no	no	no
YHR093W::chr8_2	YHR093W	AHT1	-0.108896	-0.314052	0.627502	0.612782	no	no	no	no
YHR094C::chr8_2	YHR094C	HXT1	-0.112522	0.260814	0.629525	0.32256	no	no	no	no
YHR095W::chr8_2	YHR095W	YHR095W	0.691188	0.544514	0.196292	0.203478	yes	no	yes	no
YHR096C::chr8_2	YHR096C	HXT5	-0.537158	-0.871938	0.830707	0.844144	no	no	no	no
YHR097C::chr8_2	YHR097C	YHR097C	-0.717134	-0.730779	0.88923	0.796215	no	no	no	no
YHR100C::chr8_2	YHR100C	GEP4	0.0343536	1.40391	0.545358	0.0258165	no	no	no	no
YHR103W::chr8_2	YHR103W	SBE22	-1.28737	-1.92732	0.980472	0.99142	no	no	no	no
YHR104W::chr8_2	YHR104W	GRE3	-0.114407	1.27988	0.630574	0.0371318	no	no	no	no
YHR105W::chr8_2	YHR105W	YPT35	-0.349355	-0.335464	0.751729	0.623393	no	no	no	no
YHR106W::chr8_2	YHR106W	TRR2	-0.0818305	-0.791588	0.612301	0.817852	no	no	no	no
YHR108W::chr8_2	YHR108W	GGA2	-0.600418	-1.20587	0.853205	0.925861	no	no	no	no
YHR110W::chr8_2	YHR110W	ERP5	-1.39548	-1.69664	0.986894	0.981395	no	no	no	no
YHR111W::chr8_2	YHR111W	UBA4	-0.607491	0.501401	0.855589	0.219693	no	no	no	no
YHR116W::chr8_2	YHR116W	COX23	0.501723	1.71262	0.282488	0.00945249	no	no	no	no
YHR121W::chr8_2	YHR121W	LSM12	-0.0650476	-0.80619	0.602786	0.822826	no	no	no	no
YHR123W::chr8_2	YHR123W	EPT1	-0.710509	0.572859	0.887372	0.193217	no	no	no	no
YHR124W::chr8_2	YHR124W	NDT80	0.496614	0.130321	0.285042	0.385543	no	no	no	no
YHR125W::chr8_2	YHR125W	YHR125W	0.271148	-0.259036	0.406969	0.585146	no	no	no	no
YHR126C::chr8_2	YHR126C	ANS1	0.559818	0.322126	0.254255	0.294518	no	no	no	no
YHR127W::chr00_10	YHR127W	YHR127W	0.458135	0.36638	0.304616	0.275004	no	no	no	no
YHR129C::chr8_2	YHR129C	ARP1	0.866618	0.413377	0.132701	0.255003	no	no	no	no
YHR130C::chr8_2	YHR130C	YHR130C	0.39154	0.0678939	0.339826	0.416904	no	no	no	no
YHR131C::chr00_10	YHR131C	YHR131C	-1.48626	0.864798	0.990788	0.10647	no	yes	no	yes
YHR132W-A::chr00_17b	YHR132W-A	IGO2	-0.111196	-0.98188	0.628785	0.875857	no	no	no	no
YHR133C::chr8_2	YHR133C	NSG1	0.877526	0.162245	0.12928	0.369777	no	no	no	no
YHR134W::chr8_2	YHR134W	WSS1	-0.126541	0.489239	0.637308	0.224398	no	no	no	no
YHR136C::chr8_2	YHR136C	SPL2	0.270947	-1.05631	0.407084	0.894579	no	no	no	no
YHR137W::chr8_2	YHR137W	ARO9	0.372394	-0.293921	0.350232	0.602728	no	no	no	no
YHR138C::chr8_2	YHR138C	YHR138C	1.08482	0.627044	0.0755614	0.174502	no	no	no	no
YHR139C-A::chr8_2	YHR139C-A	YHR139C-A	-0.412008	-0.582282	0.780049	0.737346	no	no	no	no
YHR139C::chr8_2	YHR139C	SPS100	1.3427	0.612969	0.0346878	0.179249	no	no	no	no
YHR140W::chr00_8	YHR140W	YHR140W	0.695669	0.138631	0.194468	0.38142	no	no	no	no
YHR142W::chr8_3	YHR142W	CHS7	0.604707	0.430676	0.233498	0.247837	no	no	no	no
YHR146W::chr00_15	YHR146W	CRP1	0.255372	0.181575	0.416023	0.360334	no	no	no	no
YHR147C::chr8_3	YHR147C	MRPL6	1.57052	2.37248	0.0156976	0.000675327	no	yes	no	yes
YHR152W::chr8_3	YHR152W	SPO12	1.01385	0.456547	0.0916115	0.237324	yes	no	yes	no
YHR154W::chr8_3	YHR154W	RTT107	0.564381	0.968906	0.252102	0.0836662	no	yes	no	yes
YHR155W::chr8_3	YHR155W	YSP1	0.811482	-0.140031	0.150946	0.524086	yes	no	yes	no
YHR158C::chr8_3	YHR158C	KEL1	1.52627	0.841325	0.0184556	0.11218	no	no	no	no
YHR159W::chr8_3	YHR159W	TDA11	0.0931991	0.192155	0.510826	0.3552	no	no	no	no
YHR168W::chr00_8	YHR168W	MTG2	0.52571	1.7506	0.27065	0.00827035	no	no	no	no
YHR171W::chr00_15	YHR171W	ATG7	-0.0615814	-0.168391	0.600813	0.538743	no	no	no	no
YHR177W::chr8_3	YHR177W	YHR177W	0.669834	0.831418	0.205129	0.114655	no	no	no	no
YHR181W::chr00_8	YHR181W	SVP26	0.922765	0.754265	0.115744	0.13526	no	no	no	no
YHR184W::chr8_3	YHR184W	SSP1	-0.389312	-0.492467	0.77001	0.69793	no	no	no	no
YHR193C::chr00_8	YHR193C	EGD2	0.0109001	-0.179101	0.55904	0.544266	yes	no	yes	no
YHR198C::chr8_3	YHR198C	AIM18	1.06454	0.726931	0.0799116	0.143134	no	no	no	no
YHR200W::chr8_3	YHR200W	RPN10	-0.0119428	0.705872	0.5723	0.149409	no	yes	no	yes
YHR202W::chr8_3	YHR202W	YHR202W	0.426706	0.546008	0.321034	0.202929	no	no	no	no
YHR203C::chr8_3	YHR203C	RPS4B	1.46598	2.30807	0.0228685	0.000900334	no	no	no	yes
YHR206W::chr8_3	YHR206W	SKN7	1.07179	1.26569	0.0783363	0.0386522	no	no	no	no
YHR207C::chr8_3	YHR207C	SET5	-0.0910136	-1.38623	0.617479	0.953525	no	no	no	no
YHR209W::chr8_3	YHR209W	CRG1	0.977615	0.423918	0.100723	0.250624	no	no	no	no
YIL001W::chr9_1	YIL001W	YIL001W	0.0620237	-1.15779	0.529147	0.91669	no	no	no	no
YIL006W::chr9_1	YIL006W	YIA6	-0.350748	-0.69004	0.752379	0.780899	no	no	no	no
YIL008W::chr9_1	YIL008W	URM1	1.59523	1.21093	0.0143178	0.0450026	no	no	no	no
YIL009W::chr9_1	YIL009W	FAA3	0.795628	-0.0886242	0.156488	0.497446	no	no	no	no
YIL010W::chr9_1	YIL010W	DOT5	0.961993	0.856979	0.104849	0.108348	no	no	no	no
YIL011W::chr9_1	YIL011W	TIR3	-0.116917	-0.021779	0.631971	0.462842	no	no	no	no
YIL012W::chr9_1	YIL012W	YIL012W	0.354579	-0.635964	0.360016	0.75958	no	no	no	no
YIL013C::chr9_1	YIL013C	PDR11	-0.567127	-0.151877	0.841628	0.530213	no	no	no	no
YIL014W::chr9_1	YIL014W	MNT3	-0.714098	-0.711288	0.888382	0.788968	no	no	no	no
YIL016W::chr9_1	YIL016W	SNL1	0.220895	-0.647558	0.43596	0.764244	no	no	no	no
YIL017C::chr9_1	YIL017C	VID28	0.172442	-2.19016	0.464243	0.996784	no	no	no	no
YIL018W::chr9_1	YIL018W	RPL2B	0.222544	0.320291	0.435002	0.29534	no	no	no	no
YIL023C::chr9_1	YIL023C	YKE4	-0.297869	-0.470059	0.727077	0.687697	no	no	no	no
YIL024C::chr9_1	YIL024C	YIL024C	-1.02102	-1.00704	0.95261	0.88243	no	no	no	no
YIL027C::chr9_1	YIL027C	EMC5	-0.32578	-1.07512	0.74059	0.898971	no	no	no	no
YIL029C::chr9_1	YIL029C	YIL029C	1.55459	-1.88883	0.0166467	0.990182	no	no	no	no
YIL030C::chr00_17b	YIL030C	SSM4	-0.594578	-0.414945	0.851216	0.661918	no	no	no	no
YIL032C::chr9_1	YIL032C	YIL032C	-0.412233	-0.546478	0.780147	0.721952	no	no	no	no
YIL034C::chr9_1	YIL034C	CAP2	1.77275	1.69588	0.00713621	0.0100188	no	no	no	no
YIL037C::chr9_1	YIL037C	PRM2	-0.919637	-1.10427	0.935889	0.905508	no	no	no	no
YIL038C::chr9_1	YIL038C	NOT3	1.272	1.47463	0.0434771	0.0207706	no	yes	no	yes
YIL039W::chr9_1	YIL039W	TED1	1.34084	1.46311	0.0348988	0.0215304	no	no	no	no
YIL041W::chr9_1	YIL041W	GVP36	0.639847	-1.86184	0.217929	0.989224	no	no	no	no
YIL042C::chr9_1	YIL042C	PKP1	-0.608627	-0.728292	0.85597	0.795299	no	no	no	no
YIL043C::chr9_1	YIL043C	CBR1	0.174483	0.0330955	0.463047	0.434631	no	no	no	no
YIL053W::chr9_1	YIL053W	RHR2	-0.77792	-2.63338	0.905258	0.999518	no	no	no	no
YIL064W::chr9_1	YIL064W	SEE1	-0.315582	-0.967429	0.735693	0.871968	no	no	no	no
YIL065C::chr9_1	YIL065C	FIS1	0.32248	-2.03221	0.377874	0.994125	no	no	no	no
YIL066C::chr9_1	YIL066C	RNR3	-0.148894	-0.0661857	0.649602	0.485815	no	no	no	no
YIL067C::chr9_1	YIL067C	YIL067C	-0.440305	-0.0318998	0.792206	0.46807	no	no	no	no
YIL069C::chr9_1	YIL069C	RPS24B	-0.0201199	0.579293	0.577027	0.190933	no	no	no	no
YIL070C::chr9_1	YIL070C	MAM33	-0.807674	0.0995096	0.91245	0.400942	no	no	no	no
YIL071C::chr9_1	YIL071C	PCI8	-0.92552	-0.99694	0.936971	0.879822	no	no	no	no
YIL072W::chr9_1	YIL072W	HOP1	0.953607	0.248606	0.107113	0.328274	yes	no	yes	no
YIL074C::chr9_1	YIL074C	SER33	-1.04961	-0.947687	0.956632	0.866519	no	no	no	no
YIL076W::chr9_1	YIL076W	SEC28	0.488153	-1.26919	0.289294	0.936735	no	no	no	no
YIL077C::chr9_1	YIL077C	YIL077C	0.452973	-2.29088	0.307287	0.997853	no	no	no	no
YIL084C::chr9_1	YIL084C	SDS3	0.110509	0.664499	0.500641	0.162262	no	no	no	no
YIL085C::chr9_1	YIL085C	KTR7	-0.742454	-0.896692	0.896128	0.851713	no	no	no	no
YIL086C::chr9_1	YIL086C	YIL086C	0.215227	0.271217	0.439254	0.317725	no	no	no	no
YIL087C::chr9_1	YIL087C	AIM19	0.335077	-0.500094	0.370833	0.701378	no	no	no	no
YIL088C::chr9_1	YIL088C	AVT7	0.58158	-0.25923	0.244073	0.585244	no	no	no	no
YIL089W::chr9_1	YIL089W	YIL089W	0.300088	0.28815	0.390492	0.30992	no	no	no	no
YIL095W::chr9_1	YIL095W	PRK1	1.2525	0.14285	0.0461957	0.379331	no	no	no	no
YIL097W::chr9_1	YIL097W	FYV10	-0.394677	-0.471884	0.772406	0.688536	no	no	no	no
YIL098C::chr9_2	YIL098C	FMC1	0.834999	-0.78619	0.14297	0.815992	no	no	no	no
YIL099W::chr9_2	YIL099W	SGA1	0.967361	0.435687	0.103417	0.245782	no	no	no	no
YIL101C::chr9_2	YIL101C	XBP1	0.0614457	-0.67444	0.529486	0.774863	no	no	no	no
YIL103W::chr9_2	YIL103W	DPH1	1.0109	0.846739	0.0923304	0.110844	yes	no	yes	no
YIL105C::chr9_2	YIL105C	SLM1	0.493405	0.804692	0.286651	0.121524	no	no	no	no
YIL107C::chr9_2	YIL107C	PFK26	0.494914	-0.944256	0.285894	0.865555	no	no	no	no
YIL110W::chr9_2	YIL110W	HPM1	0.604053	-1.88222	0.233794	0.989955	no	no	no	no
YIL112W::chr9_2	YIL112W	HOS4	1.98345	0.798897	0.00288013	0.12305	no	no	no	no
YIL113W::chr9_2	YIL113W	SDP1	-1.70257	-0.881879	0.996275	0.847214	no	no	no	no
YIL114C::chr9_2	YIL114C	POR2	1.31687	0.843301	0.0377126	0.111691	no	no	no	no
YIL116W::chr9_2	YIL116W	HIS5	-0.815163	-0.449115	0.914194	0.678	no	no	no	no
YIL117C::chr9_2	YIL117C	PRM5	-0.0823198	-0.00900884	0.612578	0.456255	no	no	no	no
YIL120W::chr9_2	YIL120W	QDR1	-0.223718	-0.328574	0.689564	0.619989	no	no	no	no
YIL121W::chr9_2	YIL121W	QDR2	0.299044	0.93839	0.391083	0.0899333	no	no	no	no
YIL125W::chr9_2	YIL125W	KGD1	-0.168461	1.62153	0.660236	0.0129065	no	no	no	no
YIL131C::chr9_2	YIL131C	FKH1	-1.02458	-0.904326	0.953126	0.853997	no	no	no	no
YIL133C::chr9_2	YIL133C	RPL16A	0.56071	0.0042837	0.253833	0.449411	no	no	no	no
YIL135C::chr9_2	YIL135C	VHS2	0.792591	-0.879994	0.157565	0.846635	no	no	no	no
YIL136W::chr9_2	YIL136W	OM45	0.745125	-0.821561	0.175023	0.827967	no	no	no	no
YIL137C::chr9_2	YIL137C	TMA108	-0.20017	-1.8873	0.6772	0.99013	no	no	no	no
YIL138C::chr9_2	YIL138C	TPM2	-0.932894	-0.498724	0.938306	0.70076	no	no	no	no
YIL140W::chr9_2	YIL140W	AXL2	0.877992	-0.452103	0.129135	0.679391	no	no	no	no
YIL141W::chr9_2	YIL141W	YIL141W	-0.316602	-0.127776	0.736185	0.51774	no	no	no	no
YIL145C::chr9_2	YIL145C	PAN6	0.36511	0.691382	0.354221	0.153831	no	no	no	no
YIL146C::chr9_2	YIL146C	ATG32	0.996625	-0.532296	0.0958642	0.715736	no	no	no	no
YIL149C::chr9_2	YIL149C	MLP2	-0.216589	-0.106357	0.685843	0.50664	no	no	no	no
YIL152W::chr9_2	YIL152W	YIL152W	0.8277	0.897021	0.145414	0.0989774	no	no	no	no
YIL156W::chr9_2	YIL156W	UBP7	0.428844	-0.0195718	0.319906	0.461702	no	no	no	no
YIL158W::chr9_2	YIL158W	AIM20	0.800071	-0.242431	0.154922	0.576714	no	no	no	no
YIL159W::chr9_2	YIL159W	BNR1	0.802498	0.274251	0.15407	0.31632	no	no	no	no
YIL161W::chr9_2	YIL161W	YIL161W	-0.369046	-0.951643	0.760834	0.867623	no	no	no	no
YIL162W::chr9_2	YIL162W	SUC2	0.714505	0.47781	0.186912	0.228871	no	no	no	no
YIL163C::chr9_2	YIL163C	YIL163C	1.16675	0.931791	0.0598032	0.0913333	no	no	no	no
YIL164C::chr9_2	YIL164C	NIT1	0.407726	-0.415706	0.331124	0.662279	no	no	no	no
YIL166C::chr9_2	YIL166C	YIL166C	-0.358925	-0.593714	0.756177	0.742167	no	no	no	no
YIL167W::chr9_2	YIL167W	SDL1	-0.986122	-0.563672	0.9473	0.729399	no	no	no	no
YIL168W::chr9_2	YIL168W	YIL168W	-0.199345	-0.424987	0.676763	0.666676	no	no	no	no
YIL173W::chr9_2	YIL173W	VTH1	0.986789	0.40472	0.0983562	0.258629	no	no	no	no
YIR001C::chr9_2	YIR001C	SGN1	-0.697114	-0.484753	0.883548	0.694424	no	no	no	no
YIR002C::chr9_2	YIR002C	MPH1	-1.28307	-1.26019	0.980168	0.935269	no	no	no	no
YIR003W::chr9_2	YIR003W	AIM21	1.43749	0.532049	0.0252448	0.208091	no	no	no	no
YIR004W::chr9_2	YIR004W	DJP1	0.978008	0.876004	0.100621	0.103819	yes	no	yes	no
YIR007W::chr9_2	YIR007W	YIR007W	0.0226773	-0.417496	0.552177	0.663129	yes	no	yes	no
YIR014W::chr9_2	YIR014W	YIR014W	1.0168	-0.905463	0.0908982	0.854335	yes	no	yes	no
YIR016W::chr9_2	YIR016W	YIR016W	-0.861226	-0.578052	0.924355	0.73555	no	no	no	no
YIR017C::chr00_3	YIR017C	MET28	0.926151	-0.511533	0.114773	0.706516	no	no	no	no
YIR018W::chr00_3	YIR018W	YAP5	-0.83195	-1.46897	0.918009	0.963078	no	no	no	no
YIR019C::chr00_3	YIR019C	MUC1	-0.324825	-0.596986	0.740133	0.743539	no	no	no	no
YIR020C::chr00_3	YIR020C	YIR020C	0.0741544	-0.133926	0.522023	0.520925	no	no	no	no
YIR020W-B::chr00_3	YIR020W-A	YIR020W-A	0.0333609	-0.291368	0.545938	0.601448	no	no	no	no
YIR021W::chr00_3	YIR021W	MRS1	-0.676505	1.11318	0.877486	0.0584018	no	no	no	no
YIR023W::chr00_17b	YIR023W	DAL81	-0.307613	-0.124713	0.731834	0.516154	no	no	no	no
YIR025W::chr00_3	YIR025W	MND2	0.78802	0.940709	0.159194	0.0894451	no	no	no	no
YIR028W::chr00_3	YIR028W	DAL4	0.614266	0.306854	0.229203	0.301397	no	no	no	no
YIR029W::chr00_3	YIR029W	DAL2	1.12048	0.497771	0.0683517	0.221091	no	no	no	no
YIR031C::chr00_3	YIR031C	DAL7	1.48102	1.10678	0.0216917	0.0593777	no	no	no	no
YIR032C::chr00_17b	YIR032C	DAL3	-0.0483379	-1.09858	0.593252	0.904257	no	no	no	no
YIR035C::chr00_3	YIR035C	YIR035C	0.700307	-0.32075	0.19259	0.616111	no	no	no	no
YIR037W::chr00_3	YIR037W	HYR1	0.745499	0.352751	0.174881	0.280945	yes	no	yes	no
YIR038C::chr00_3	YIR038C	GTT1	-0.728934	-0.918331	0.892485	0.858124	no	no	no	no
YIR042C::chr00_3	YIR042C	YIR042C	0.839079	-0.19657	0.141615	0.553255	no	no	no	no
YIR043C::chr00_17b	YIR043C	YIR043C	0.604845	0.0666964	0.233436	0.417511	no	no	no	no
YIR044C::chr00_17b	YIR044C	YIR044C	0.533238	0.0241883	0.266987	0.439192	no	no	no	no
YJL003W::chr00_13	YJL003W	COX16	-0.243947	2.26816	0.70002	0.0010724	no	no	no	no
YJL004C::chr00_13	YJL004C	SYS1	0.193011	0.351626	0.452206	0.281438	no	yes	no	yes
YJL007C::chr00_13	YJL007C	YJL007C	0.340476	0.351079	0.367827	0.281678	no	no	no	no
YJL012C::chr00_13	YJL012C	VTC4	1.33046	1.31734	0.036095	0.0333517	yes	no	yes	no
YJL013C::chr00_13	YJL013C	MAD3	0.727324	0.487137	0.181875	0.225217	no	no	no	no
YJL016W::chr00_13	YJL016W	YJL016W	0.651863	0.46069	0.212745	0.235664	no	no	no	no
YJL017W::chr00_13	YJL016W	YJL016W	0.16635	-0.12519	0.467815	0.516401	no	no	no	no
YJL021C::chr00_13	YJL020C	BBC1	0.434403	-0.462436	0.316979	0.684182	no	no	no	no
YJL023C::chr00_13	YJL023C	PET130	-0.542924	0.421681	0.832845	0.251549	no	no	no	no
YJL027C::chr00_13	YJL027C	YJL027C	0.765215	0.700712	0.167489	0.150974	no	no	no	no
YJL030W::chr10_2	YJL030W	MAD2	0.0146808	-0.388575	0.556839	0.6493	no	no	no	no
YJL036W::chr10_2	YJL036W	SNX4	-0.894141	0.0749076	0.931035	0.41335	no	no	no	no
YJL042W::chr00_15	YJL042W	MHP1	0.151088	-0.306505	0.476774	0.609021	no	no	no	no
YJL043W::chr10_2	YJL043W	YJL043W	1.51379	0.825414	0.0193039	0.116173	no	no	no	no
YJL044C::chr10_2	YJL044C	GYP6	0.397027	-0.0110786	0.336866	0.457322	no	no	no	no
YJL046W::chr10_2	YJL046W	AIM22	0.904724	2.55292	0.121016	0.000291391	no	no	no	yes
YJL047C::chr10_2	YJL047C	RTT101	-0.0385765	1.13334	0.587656	0.055409	no	no	no	no
YJL048C::chr10_2	YJL048C	UBX6	0.434847	0.477201	0.316746	0.229111	no	no	no	no
YJL049W::chr10_2	YJL049W	YJL049W	1.03153	0.60784	0.0873957	0.180999	no	no	no	no
YJL057C::chr10_2	YJL057C	IKS1	0.302356	0.0107988	0.389208	0.446062	no	no	no	no
YJL058C::chr10_2	YJL058C	BIT61	-0.838964	-0.0806951	0.919565	0.493335	no	no	no	no
YJL060W::chr10_2	YJL060W	BNA3	-0.0645257	0.107748	0.602489	0.396808	no	no	no	no
YJL062W::chr10_2	YJL062W	LAS21	-1.34961	2.53137	0.984435	0.000323038	no	yes	no	yes
YJL063C::chr10_2	YJL063C	MRPL8	-0.468761	2.46017	0.804022	0.000451779	no	no	no	yes
YJL064W::chr10_2	YJL064W	YJL064W	0.686037	0.495905	0.198402	0.221812	no	no	no	no
YJL066C::chr10_2	YJL066C	MPM1	-0.801467	-0.478661	0.910984	0.691643	no	no	no	no
YJL068C::chr10_2	YJL068C	YJL068C	-0.179584	-0.486361	0.666226	0.695156	no	no	no	no
YJL071W::chr10_2	YJL071W	ARG2	-0.714156	-0.524337	0.888398	0.712218	no	no	no	no
YJL073W::chr10_2	YJL073W	JEM1	-0.153221	-0.243872	0.651964	0.577447	no	no	no	no
YJL078C::chr00_15	YJL078C	PRY3	0.238153	-0.000835332	0.425957	0.452045	no	no	no	no
YJL079C::chr10_2	YJL079C	PRY1	1.02561	0.831343	0.0887917	0.114674	yes	no	yes	no
YJL080C::chr10_2	YJL080C	SCP160	0.408075	0.0910573	0.330937	0.405194	no	no	no	no
YJL082W::chr10_2	YJL082W	IML2	0.39259	0.0148527	0.339259	0.44398	no	no	no	no
YJL083W::chr10_2	YJL083W	TAX4	-0.495313	-0.562873	0.81467	0.729055	no	no	no	no
YJL084C::chr10_2	YJL084C	ALY2	0.716445	-0.388001	0.186144	0.649023	no	no	no	no
YJL088W::chr10_2	YJL088W	ARG3	-0.754402	-0.403966	0.899272	0.656686	no	no	no	no
YJL092W::chr10_2	YJL092W	SRS2	0.0707973	-0.522572	0.523995	0.711435	no	no	no	no
YJL093C::chr10_2	YJL093C	TOK1	0.44105	-0.690065	0.313495	0.780908	no	no	no	no
YJL094C::chr00_15	YJL094C	KHA1	-0.0827765	-0.0906448	0.612836	0.498494	no	no	no	no
YJL096W::chr10_2	YJL096W	MRPL49	0.649834	1.68275	0.213615	0.0104835	no	no	no	no
YJL098W::chr10_2	YJL098W	SAP185	0.871809	1.99847	0.131065	0.00327489	no	no	no	no
YJL100W::chr10_2	YJL100W	LSB6	-0.0643314	0.0531772	0.602379	0.424383	no	no	no	no
YJL102W::chr10_2	YJL102W	MEF2	0.105259	1.90694	0.50373	0.00466196	no	no	no	no
YJL103C::chr00_18	YJL103C	GSM1	1.35396	0.202893	0.0334327	0.350018	yes	no	yes	no
YJL106W::chr10_2	YJL106W	IME2	0.0275767	-0.170863	0.549318	0.540019	no	no	no	no
YJL107C::chr10_2	YJL107C	YJL107C	-0.847785	0.805082	0.92149	0.121421	no	no	no	no
YJL108C::chr10_2	YJL108C	PRM10	0.102398	-1.21068	0.505413	0.926733	no	no	no	no
YJL110C::chr10_2	YJL110C	GZF3	-1.03481	-0.0118253	0.954586	0.457707	no	no	no	no
YJL119C::chr10_2	YJL119C	YJL119C	-0.639037	-0.410337	0.865906	0.659726	no	no	no	no
YJL120W::chr10_2	YJL120W	YJL120W	0.977058	1.37242	0.100868	0.0283734	no	no	no	no
YJL121C::chr10_2	YJL121C	RPE1	0.68867	0.36641	0.197322	0.27499	no	no	no	no
YJL122W::chr10_2	YJL122W	ALB1	-0.4598	-1.0816	0.800346	0.90045	no	no	no	no
YJL123C::chr10_2	YJL123C	MTC1	0.0264562	-1.75139	0.549972	0.984404	no	no	no	no
YJL124C::chr10_2	YJL124C	LSM1	0.0403609	0.886883	0.541844	0.101292	no	no	no	no
YJL126W::chr10_2	YJL126W	NIT2	-0.696846	-1.11805	0.883471	0.908488	no	no	no	no
YJL130C::chr10_1	YJL130C	URA2	-0.549752	-0.0572479	0.835354	0.481185	no	no	no	no
YJL132W::chr00_14	YJL132W	YJL132W	0.245996	-0.321936	0.421426	0.616699	no	no	no	no
YJL133W::chr10_1	YJL133W	MRS3	0.0842517	-0.889312	0.516088	0.849483	no	no	no	no
YJL134W::chr10_1	YJL134W	LCB3	-0.356078	-0.32811	0.754858	0.619759	no	no	no	no
YJL135W::chr10_1	YJL135W	YJL135W	0.202271	0.154428	0.4468	0.373618	no	no	no	no
YJL137C::chr00_14	YJL137C	GLG2	0.647476	-0.379593	0.214629	0.644963	no	no	no	no
YJL141C::chr00_14	YJL141C	YAK1	1.50173	0.264854	0.0201556	0.320679	no	no	no	no
YJL142C::chr10_1	YJL142C	IRC9	-0.668588	-0.0427818	0.8751	0.473697	no	no	no	no
YJL144W::chr10_1	YJL144W	YJL144W	0.181596	-0.41003	0.458881	0.659579	no	no	no	no
YJL145W::chr10_1	YJL145W	SFH5	0.318946	-0.496414	0.379858	0.699716	no	no	no	no
YJL147C::chr10_1	YJL147C	YJL147C	-0.106727	-0.462814	0.626291	0.684357	no	no	no	no
YJL148W::chr10_1	YJL148W	RPA34	1.18919	-1.17324	0.055971	0.919725	no	no	no	no
YJL150W::chr10_1	YJL150W	YJL150W	0.288994	0.234862	0.396787	0.334755	no	no	no	no
YJL151C::chr00_14	YJL151C	SNA3	-1.44337	-1.48353	0.989096	0.964579	no	no	no	no
YJL152W::chr10_1	YJL152W	YJL152W	-0.186244	-0.604564	0.669792	0.7467	no	no	no	no
YJL153C::chr10_1	YJL153C	INO1	-0.091758	-0.574325	0.617898	0.733963	no	no	no	no
YJL154C::chr10_1	YJL154C	VPS35	1.01801	0.935316	0.0906072	0.0905834	no	no	no	no
YJL155C::chr10_1	YJL155C	FBP26	-0.721447	-0.734494	0.890428	0.79758	no	no	no	no
YJL157C::chr10_1	YJL157C	FAR1	-0.488591	-0.201609	0.812009	0.555844	no	no	no	no
YJL158C::chr10_1	YJL158C	CIS3	0.654954	-0.00723581	0.211423	0.455341	no	no	no	no
YJL163C::chr00_14	YJL163C	YJL163C	-0.90449	-1.32245	0.933038	0.944884	no	no	no	no
YJL164C::chr10_1	YJL164C	TPK1	0.683789	-1.93347	0.199327	0.991605	yes	no	yes	no
YJL166W::chr10_1	YJL166W	QCR8	0.173304	1.20825	0.463738	0.0453338	no	no	no	no
YJL168C::chr10_1	YJL168C	SET2	1.43151	0.697033	0.0257689	0.152096	no	no	no	no
YJL169W::chr10_1	YJL169W	YJL169W	0.555815	-0.0275762	0.256152	0.465836	no	no	no	no
YJL170C::chr10_1	YJL170C	ASG7	-0.830412	-1.08143	0.917665	0.900411	no	no	no	no
YJL172W::chr00_14	YJL172W	CPS1	-0.587222	-0.104809	0.848686	0.505838	no	no	no	no
YJL175W::chr00_14	YJL175W	YJL175W	1.32081	1.60176	0.0372374	0.013786	no	yes	no	yes
YJL177W::chr00_14	YJL177W	RPL17B	0.0591229	-0.908223	0.530849	0.855153	no	no	no	no
YJL178C::chr10_1	YJL178C	ATG27	-0.168858	-1.04949	0.660451	0.892955	no	no	no	no
YJL182C::chr10_1	YJL182C	YJL182C	0.465326	0.329311	0.300913	0.291306	no	no	no	no
YJL183W::chr10_1	YJL183W	MNN11	-1.37416	1.65399	0.985796	0.0115675	no	no	no	no
YJL186W::chr10_1	YJL186W	MNN5	0.022926	-1.39116	0.552032	0.954145	no	no	no	no
YJL190C::chr10_1	YJL190C	RPS22A	-0.932883	-0.0962779	0.938304	0.501415	no	no	no	no
YJL191W::chr00_14	YJL191W	RPS14B	-0.189071	-0.0590981	0.671301	0.482143	no	no	no	no
YJL192C::chr10_1	YJL192C	SOP4	-0.209063	-0.706538	0.681893	0.78718	no	no	no	no
YJL193W::chr10_1	YJL193W	YJL193W	-0.338436	-1.55399	0.746602	0.971157	no	no	no	no
YJL197W::chr10_1	YJL197W	UBP12	0.0500961	-0.251796	0.536142	0.581474	no	no	no	no
YJL198W::chr10_1	YJL198W	PHO90	0.141657	0.451506	0.482317	0.239353	no	no	no	no
YJL199C::chr10_1	YJL199C	MBB1	1.01622	-0.264985	0.091038	0.588157	no	no	no	no
YJL200C::chr00_14	YJL200C	ACO2	-0.516386	-0.596297	0.822861	0.74325	no	no	no	no
YJL201W::chr10_1	YJL201W	ECM25	0.549519	-0.590004	0.25915	0.740608	no	no	no	no
YJL204C::chr10_1	YJL204C	RCY1	1.28473	1.28473	0.0417735	0.0366231	yes	yes	yes	yes
YJL206C::chr00_14	YJL206C	YJL206C	0.691101	0.520128	0.196328	0.21256	no	no	no	no
YJL207C::chr10_1	YJL207C	LAA1	0.633595	0.342276	0.220654	0.285553	no	no	no	no
YJL209W::chr10_1	YJL209W	CBP1	0.578228	1.72402	0.245627	0.00908312	no	yes	no	yes
YJL210W::chr10_1	YJL210W	PEX2	1.57757	0.54556	0.0152926	0.203093	no	no	no	no
YJL213W::chr00_14	YJL213W	YJL213W	-0.166097	-0.447674	0.658958	0.677328	no	no	no	no
YJL214W::chr10_1	YJL214W	HXT8	0.473437	0.26754	0.296761	0.319431	no	no	no	no
YJL215C::chr10_1	YJL215C	YJL215C	0.441676	-0.906093	0.313168	0.854522	no	no	no	no
YJL216C::chr10_1	YJL216C	IMA5	1.86316	1.19752	0.00488747	0.0466786	yes	no	yes	no
YJL217W::chr10_1	YJL217W	REE1	0.706382	-0.0648344	0.190148	0.485115	no	no	no	no
YJL218W::chr10_1	YJL218W	YJL218W	0.37123	-0.508262	0.350868	0.705051	no	no	no	no
YJR001W::chr00_13	YJR001W	AVT1	0.0492254	-1.01319	0.536653	0.883998	no	no	no	no
YJR003C::chr00_17b	YJR003C	YJR003C	-0.991503	-0.926903	0.948148	0.860612	no	no	no	no
YJR004C::chr00_13	YJR004C	SAG1	-0.729211	-0.728449	0.89256	0.795357	no	no	no	no
YJR005W::chr00_13	YJR005W	APL1	0.741941	-0.332583	0.176236	0.621971	yes	no	yes	no
YJR008W::chr00_13	YJR008W	MHO1	-1.59696	-2.2554	0.994136	0.99752	no	no	no	no
YJR009C::chr00_13	YJR009C	TDH2	-0.339623	-0.612085	0.747162	0.749818	no	no	no	no
YJR010W::chr00_13	YJR010W	MET3	1.2563	-1.0408	0.0456554	0.890858	no	no	no	no
YJR011C::chr00_13	YJR011C	YJR011C	1.26011	0.0314669	0.0451184	0.435465	no	no	no	no
YJR019C::chr00_13	YJR019C	TES1	-0.96079	-1.36594	0.943159	0.950903	no	no	no	no
YJR025C::chr00_13	YJR025C	BNA1	0.45085	-0.129434	0.308389	0.518599	yes	no	yes	no
YJR030C::chr00_13	YJR030C	YJR030C	-2.11654	-0.759873	0.999493	0.806752	no	no	no	no
YJR031C::chr00_13	YJR031C	GEA1	-0.130579	0.441314	0.63954	0.243484	no	no	no	no
YJR033C::chr00_13	YJR033C	RAV1	-0.0927833	1.33046	0.618475	0.0321047	no	yes	no	yes
YJR036C::chr00_13	YJR036C	HUL4	0.130011	-0.295735	0.489166	0.603637	yes	no	yes	no
YJR037W::chr00_13	YJR037W	YJR037W	0.35939	-0.0195911	0.357364	0.461712	no	no	no	no
YJR038C::chr00_13	YJR038C	YJR038C	1.32511	0.353952	0.0367248	0.280419	no	no	no	no
YJR039W::chr00_13	YJR039W	YJR039W	0.53866	-0.234394	0.264364	0.57262	no	no	no	no
YJR040W::chr00_13	YJR040W	GEF1	0.732204	0.198529	0.17998	0.352121	no	no	no	no
YJR043C::chr00_13	YJR043C	POL32	1.96281	0.584969	0.00316024	0.188931	yes	no	yes	no
YJR051W::chr00_13	YJR051W	OSM1	-0.412661	-0.232037	0.780334	0.571418	no	no	no	no
YJR053W::chr00_13	YJR053W	BFA1	-0.108031	0.108838	0.627019	0.396262	no	no	no	no
YJR054W::chr00_13	YJR054W	YJR054W	1.44211	0.994773	0.0248462	0.0786157	yes	no	yes	no
YJR058C::chr00_13	YJR058C	APS2	-0.481907	-0.370093	0.80934	0.640356	no	no	no	no
YJR059W::chr00_13	YJR059W	PTK2	-0.4206	1.7868	0.783783	0.00726661	no	no	no	no
YJR060W::chr00_13	YJR060W	CBF1	0.166042	0.560192	0.467996	0.197763	no	no	no	no
YJR061W::chr00_13	YJR061W	YJR061W	-0.663096	-0.627017	0.873425	0.755947	no	no	no	no
YJR062C::chr00_13	YJR062C	NTA1	0.477627	-0.291077	0.294626	0.601302	no	no	no	no
YJR066W::chr00_13	YJR066W	TOR1	-0.265823	-0.062925	0.711142	0.484126	no	no	no	no
YJR073C::chr10_4	YJR073C	OPI3	-0.0833047	0.545897	0.613134	0.20297	no	no	no	no
YJR077C::chr00_12	YJR077C	MIR1	-0.22096	0.546727	0.688127	0.202665	no	no	no	no
YJR078W::chr10_4	YJR078W	BNA2	-0.396409	-0.0262407	0.773177	0.465146	no	no	no	no
YJR080C::chr00_12	YJR080C	AIM24	-1.04357	-1.32915	0.955806	0.945846	no	no	no	no
YJR082C::chr10_4	YJR082C	EAF6	0.81798	-0.605157	0.148713	0.746947	no	no	no	no
YJR083C::chr10_4	YJR083C	ACF4	-0.406165	0.898117	0.777489	0.0987296	no	no	no	no
YJR091C::chr00_12	YJR091C	JSN1	0.172361	-0.429923	0.46429	0.669006	no	no	no	no
YJR094C::chr00_12	YJR094C	IME1	0.220176	-0.631338	0.436377	0.757705	no	no	no	no
YJR094W-A::chr00_12	YJR094W-A	RPL43B	-0.187769	0.332771	0.670607	0.289766	no	no	no	no
YJR095W::chr00_12	YJR095W	SFC1	-0.724961	-0.433986	0.891397	0.670918	no	no	no	no
YJR097W::chr00_12	YJR097W	JJJ3	0.319703	-0.727054	0.379433	0.794842	no	no	no	no
YJR098C::chr00_12	YJR098C	YJR098C	0.291804	-0.0396043	0.39519	0.472053	no	no	no	no
YJR103W::chr10_4	YJR103W	URA8	-0.735595	-0.464894	0.894291	0.685317	no	no	no	no
YJR105W::chr10_4	YJR105W	ADO1	0.00476109	0.124557	0.562611	0.388411	no	yes	no	yes
YJR106W::chr00_12	YJR106W	ECM27	0.573932	-0.648867	0.247626	0.764767	no	no	no	no
YJR107W::chr00_12	YJR107W	YJR107W	0.0487044	-1.28069	0.536958	0.93857	no	no	no	no
YJR110W::chr10_4	YJR110W	YMR1	0.331673	-0.0804377	0.372732	0.493202	no	no	no	no
YJR111C::chr10_4	YJR111C	YJR111C	0.709085	-1.19956	0.189067	0.924703	no	no	no	no
YJR113C::chr00_12	YJR113C	RSM7	-0.270637	2.89625	0.713564	5.10165e-05	no	no	no	yes
YJR115W::chr10_4	YJR115W	YJR115W	0.541981	-0.310101	0.262764	0.610815	no	no	no	no
YJR116W::chr00_12	YJR116W	TDA4	0.0733049	-0.479389	0.522522	0.691976	no	no	no	no
YJR120W::chr00_12	YJR120W	YJR120W	-0.699941	1.464	0.884363	0.0214706	no	no	no	no
YJR121W::chr00_12	YJR121W	ATP2	-0.271898	1.91216	0.714196	0.0045705	no	no	no	no
YJR122W::chr00_12	YJR122W	IBA57	0.050117	1.48342	0.53613	0.0202059	no	no	no	no
YJR124C::chr00_12	YJR124C	YJR124C	-0.641289	-0.640504	0.866622	0.761412	no	no	no	no
YJR126C::chr00_12	YJR126C	VPS70	-0.467026	0.0537401	0.803313	0.424096	no	no	no	no
YJR129C::chr10_4	YJR129C	YJR129C	0.804756	-0.181744	0.153281	0.545628	no	no	no	no
YJR130C::chr10_4	YJR130C	STR2	-0.0953756	0.0305135	0.619932	0.435953	no	no	no	no
YJR140C::chr00_12	YJR140C	HIR3	0.868065	-1.54402	0.132244	0.970293	yes	no	yes	no
YJR144W::chr00_12	YJR144W	MGM101	-0.278198	1.27014	0.717347	0.0381707	no	no	no	no
YJR146W::chr10_4	YJR146W	YJR146W	0.370231	-0.557678	0.351415	0.726814	no	no	no	no
YJR148W::chr00_12	YJR148W	BAT2	0.499156	-0.34793	0.28377	0.629529	no	no	no	no
YJR150C::chr00_12	YJR150C	DAN1	0.0681987	-0.264384	0.525522	0.587853	no	no	no	no
YJR152W::chr10_4	YJR152W	DAL5	-1.04977	-0.705147	0.956654	0.786654	no	no	no	no
YJR153W::chr00_12	YJR153W	PGU1	-0.166434	0.219139	0.659141	0.342229	no	no	no	no
YJR154W::chr10_4	YJR154W	YJR154W	0.0144625	0.0253233	0.556966	0.43861	no	no	no	no
YKL001C::chr11_1	YKL001C	MET14	-0.350088	-0.663015	0.752071	0.770383	no	no	no	no
YKL002W::chr11_1	YKL002W	DID4	0.928786	0.667989	0.114022	0.161151	yes	no	yes	no
YKL005C::chr00_12	YKL005C	BYE1	0.169785	-0.200207	0.465801	0.555124	no	no	no	no
YKL006W::chr11_1	YKL006W	RPL14A	-0.278389	1.40434	0.717442	0.0257827	no	yes	no	yes
YKL008C::chr11_1	YKL008C	LAC1	-0.377103	-0.658835	0.764506	0.768732	no	no	no	no
YKL010C::chr11_1	YKL010C	UFD4	-0.0950067	0.208708	0.619725	0.347222	no	no	no	no
YKL011C::chr11_1	YKL011C	CCE1	-1.21295	-0.916401	0.974638	0.85756	no	no	no	no
YKL015W::chr11_1	YKL015W	PUT3	-1.26215	-0.347314	0.978638	0.629227	no	no	no	no
YKL017C::chr11_1	YKL017C	HCS1	0.0935999	-0.919124	0.51059	0.858356	no	no	no	no
YKL026C::chr11_1	YKL026C	GPX1	0.224509	-0.526989	0.433861	0.713392	no	no	no	no
YKL029C::chr11_1	YKL029C	MAE1	-1.15862	-1.85521	0.969511	0.988976	no	no	no	no
YKL030W::chr00_12	YKL030W	YKL030W	0.00916179	-0.497712	0.560052	0.700303	no	no	no	no
YKL031W::chr11_1	YKL031W	YKL031W	-0.8235	0.000821786	0.916105	0.451192	no	no	no	no
YKL032C::chr11_1	YKL032C	IXR1	-0.0922407	0.0377349	0.61817	0.43226	no	no	no	no
YKL033W-A::chr00_3	YKL033W-A	YKL033W-A	-0.941676	-0.434708	0.939867	0.671257	no	no	no	no
YKL038W::chr11_1	YKL038W	RGT1	0.1245	0.0272975	0.492408	0.437599	no	no	no	no
YKL039W::chr11_1	YKL039W	PTM1	1.05928	0.720278	0.0810717	0.145097	no	no	no	no
YKL040C::chr11_1	YKL040C	NFU1	-0.970577	-0.642233	0.944788	0.762108	no	no	no	no
YKL043W::chr11_1	YKL043W	PHD1	-0.772846	0.350085	0.903989	0.282114	no	no	no	no
YKL048C::chr11_1	YKL048C	ELM1	0.906711	0.80925	0.120427	0.120332	yes	no	yes	no
YKL050C::chr11_1	YKL050C	YKL050C	0.277499	-0.76702	0.403338	0.809289	no	no	no	no
YKL053C-A::chr00_17b	YKL053C-A	MDM35	0.694307	2.26425	0.195021	0.00109081	no	no	no	no
YKL053W::chr11_1	YKL053W	YKL053W	0.292824	-0.740155	0.394611	0.799648	no	no	no	no
YKL055C::chr11_1	YKL055C	OAR1	-0.32137	2.32655	0.738478	0.000829591	no	no	no	yes
YKL061W::chr11_1	YKL061W	BLI1	0.53314	0.0558813	0.267034	0.423006	no	no	no	no
YKL062W::chr11_1	YKL062W	MSN4	0.901446	0.338639	0.121992	0.287161	no	no	no	no
YKL063C::chr11_1	YKL063C	YKL063C	0.307324	-0.70652	0.386401	0.787173	no	no	no	no
YKL064W::chr11_1	YKL064W	MNR2	-1.26823	-1.31377	0.979092	0.943615	no	no	no	no
YKL065C::chr11_1	YKL065C	YET1	-0.435732	-0.698128	0.790269	0.783991	no	no	no	no
YKL066W::chr11_1	YKL066W	YKL066W	-0.210501	0.61472	0.682649	0.178654	no	no	no	no
YKL067W::chr11_1	YKL067W	YNK1	0.283385	-0.170206	0.39998	0.53968	no	no	no	no
YKL068W::chr11_1	YKL068W	NUP100	0.697241	0.451771	0.19383	0.239246	no	no	no	no
YKL070W::chr11_1	YKL070W	YKL070W	0.825082	0.18259	0.146298	0.35984	no	no	no	no
YKL071W::chr11_1	YKL071W	YKL071W	-0.18326	-0.161027	0.668196	0.534942	no	no	no	no
YKL072W::chr11_1	YKL072W	STB6	-0.304457	-1.50485	0.730298	0.966688	no	no	no	no
YKL073W::chr11_1	YKL073W	LHS1	-0.431978	0.920071	0.78867	0.0938594	no	no	no	no
YKL074C::chr11_1	YKL074C	MUD2	1.74657	1.06348	0.00793902	0.0663243	no	no	no	no
YKL076C::chr11_1	YKL076C	PSY1	0.784066	-0.805955	0.160613	0.822746	yes	no	yes	no
YKL077W::chr11_1	YKL077W	YKL077W	-0.110567	1.15706	0.628435	0.0520424	no	no	no	no
YKL079W::chr11_1	YKL079W	SMY1	-0.852125	-0.399902	0.922424	0.654741	no	no	no	no
YKL084W::chr11_1	YKL084W	HOT13	0.762411	0.660596	0.168528	0.163511	no	no	no	no
YKL085W::chr11_1	YKL085W	MDH1	-0.601656	0.0615592	0.853624	0.420119	no	no	no	no
YKL087C::chr11_1	YKL087C	CYT2	-0.421088	0.556631	0.783994	0.199052	no	no	no	no
YKL090W::chr11_1	YKL090W	CUE2	-0.277038	-0.928859	0.716768	0.861175	no	no	no	no
YKL091C::chr11_1	YKL091C	YKL091C	-0.99877	-1.16779	0.949276	0.918664	no	no	no	no
YKL094W::chr11_1	YKL094W	YJU3	0.734238	-0.287112	0.179194	0.599311	no	no	no	no
YKL096W-A::chr00_14	YKL096W-A	CWP2	-0.308436	-0.750011	0.732234	0.803219	no	no	no	no
YKL096W::chr11_2	YKL096W	CWP1	0.627057	0.040274	0.223525	0.430962	yes	no	yes	no
YKL097C::chr11_2	YKL097C	YKL097C	0.711938	-0.866569	0.18793	0.84247	no	no	no	no
YKL102C::chr11_2	YKL102C	YKL102C	1.14739	0.699585	0.0632713	0.151317	no	no	no	no
YKL103C::chr11_2	YKL103C	APE1	-0.747267	-0.485376	0.897403	0.694708	no	no	no	no
YKL110C::chr11_2	YKL110C	KTI12	0.312862	2.12268	0.383279	0.00198626	no	no	no	no
YKL113C::chr11_2	YKL113C	RAD27	-0.123186	-0.191889	0.63545	0.550849	no	no	no	no
YKL115C::chr00_14	YKL115C	YKL115C	0.687493	0.679203	0.197804	0.157614	yes	no	yes	no
YKL118W::chr11_2	YKL118W	YKL118W	0.713158	0.713158	0.187446	0.147218	yes	yes	yes	yes
YKL120W::chr11_2	YKL120W	OAC1	0.869588	0.127136	0.131764	0.387127	no	no	no	no
YKL130C::chr11_2	YKL130C	SHE2	-0.660487	-1.07531	0.872624	0.899013	no	no	no	no
YKL131W::chr11_2	YKL131W	YKL131W	-1.06987	-0.20856	0.959311	0.55941	no	no	no	no
YKL132C::chr11_2	YKL132C	RMA1	0.380491	0.438783	0.345817	0.244516	no	no	no	no
YKL133C::chr11_2	YKL133C	YKL133C	0.689932	0.356542	0.196805	0.279286	no	no	no	no
YKL136W::chr11_2	YKL136W	YKL136W	0.537946	-1.83454	0.264709	0.988172	no	no	no	no
YKL137W::chr11_2	YKL137W	CMC1	0.356123	0.36949	0.359165	0.273656	no	no	no	no
YKL138C::chr11_2	YKL138C	MRPL31	-0.290766	1.42344	0.723583	0.0243301	no	no	no	no
YKL140W::chr11_2	YKL140W	TGL1	-0.0180242	0.172836	0.575817	0.364593	no	no	no	no
YKL155C::chr11_2	YKL155C	RSM22	-0.606554	0.910806	0.855275	0.0958926	no	no	no	no
YKL156W::chr11_2	YKL156W	RPS27A	-0.367267	0.120397	0.760018	0.390484	no	no	no	no
YKL157W::chr11_2	YKL157W	APE2	0.650031	0.67394	0.213531	0.159268	no	no	no	no
YKL158W::chr11_2	YKL157W	APE2	1.09817	-0.576059	0.0727965	0.734702	no	no	no	no
YKL161C::chr11_2	YKL161C	KDX1	0.675839	0.119619	0.20262	0.390873	no	no	no	no
YKL162C-A::chr00_3	YKL162C-A	YKL162C-A	0.609583	0.622144	0.231302	0.176145	no	no	no	no
YKL162C::chr11_2	YKL162C	YKL162C	-0.847183	-0.963735	0.92136	0.87096	no	no	no	no
YKL163W::chr11_2	YKL163W	PIR3	-0.495965	-0.623961	0.814928	0.754699	no	no	no	no
YKL164C::chr11_2	YKL164C	PIR1	-0.768493	-0.868403	0.902891	0.843043	no	no	no	no
YKL168C::chr11_2	YKL168C	KKQ8	0.609024	-0.4744	0.231553	0.689691	no	no	no	no
YKL171W::chr11_2	YKL171W	NNK1	0.019003	-0.882344	0.55432	0.847356	no	no	no	no
YKL174C::chr11_2	YKL174C	TPO5	-0.411759	-1.29433	0.77994	0.940692	no	no	no	no
YKL175W::chr11_2	YKL175W	ZRT3	0.192535	-0.763134	0.452484	0.807912	no	no	no	no
YKL179C::chr11_2	YKL179C	COY1	-0.644082	-0.548758	0.867508	0.722946	no	no	no	no
YKL183W::chr11_2	YKL183W	LOT5	-0.692068	-0.745755	0.882084	0.801681	no	no	no	no
YKL188C::chr11_2	YKL188C	PXA2	-0.622212	-0.85194	0.860468	0.837847	no	no	no	no
YKL197C::chr11_3	YKL197C	PEX1	0.17292	-0.0549937	0.463963	0.480018	yes	no	yes	no
YKL198C::chr11_3	YKL198C	PTK1	0.5097	-0.496457	0.278524	0.699736	no	no	no	no
YKL199C::chr11_3	YKL198C	PTK1	-0.187438	-0.232424	0.67043	0.571616	no	no	no	no
YKL200C::chr11_3	YKL201C	MNN4	0.922513	-0.049003	0.115817	0.476916	yes	no	yes	no
YKL201C::chr00_14	YKL201C	MNN4	-0.327481	-0.496428	0.741402	0.699723	no	no	no	no
YKL202W::chr00_14	YKL202W	YKL202W	0.183294	-0.0225128	0.457888	0.463221	no	no	no	no
YKL205W::chr11_3	YKL205W	LOS1	0.248215	0.355171	0.420146	0.279885	no	no	no	no
YKL207W::chr11_3	YKL207W	EMC3	-0.409577	0.380517	0.778986	0.268907	no	no	no	no
YKL208W::chr11_3	YKL208W	CBT1	0.0775048	1.69671	0.520054	0.00999003	no	yes	no	yes
YKL211C::chr11_3	YKL211C	TRP3	-0.774594	0.446485	0.904428	0.241384	no	yes	no	yes
YKL214C::chr11_3	YKL214C	YRA2	-0.239618	0.0576574	0.697795	0.422103	no	no	no	no
YKL215C::chr00_14	YKL215C	OXP1	-0.565933	-0.870974	0.841202	0.843844	no	no	no	no
YKL220C::chr00_14	YKL220C	FRE2	-0.0227643	0.147637	0.578554	0.376966	no	no	no	no
YKL222C::chr11_3	YKL222C	YKL222C	0.502846	-1.26789	0.281929	0.936525	no	no	no	no
YKR003W::chr11_3	YKR003W	OSH6	-0.614063	-0.257117	0.857782	0.584173	no	no	no	no
YKR007W::chr11_3	YKR007W	MEH1	0.913053	0.913053	0.118562	0.0953966	yes	yes	yes	yes
YKR010C::chr00_14	YKR010C	TOF2	-0.574642	-0.860268	0.844292	0.840489	no	no	no	no
YKR012C::chr11_3	YKR012C	YKR012C	1.21715	-0.0974887	0.0514683	0.502042	yes	no	yes	no
YKR013W::chr11_3	YKR013W	PRY2	1.00602	-0.103067	0.0935284	0.504935	no	no	no	no
YKR015C::chr11_3	YKR015C	YKR015C	-1.06097	-0.851712	0.958152	0.837774	no	no	no	no
YKR017C::chr11_3	YKR017C	YKR017C	1.03726	-0.427814	0.0860589	0.668011	yes	no	yes	no
YKR018C::chr11_3	YKR018C	YKR018C	-0.826765	-0.988278	0.916845	0.877553	no	no	no	no
YKR019C::chr00_14	YKR019C	IRS4	0.323337	0.300595	0.377394	0.304237	yes	no	yes	no
YKR020W::chr11_3	YKR020W	VPS51	1.1032	1.96128	0.0717753	0.00378618	no	yes	no	yes
YKR023W::chr00_14	YKR023W	YKR023W	0.96283	0.281404	0.104624	0.313019	no	no	no	no
YKR024C::chr11_3	YKR024C	DBP7	-0.361173	0.0857874	0.757216	0.407851	no	yes	no	yes
YKR027W::chr00_14	YKR027W	BCH2	0.587957	0.397956	0.241132	0.26148	yes	no	yes	no
YKR028W::chr00_14	YKR028W	SAP190	0.493681	1.38102	0.286512	0.0276549	no	no	no	no
YKR029C::chr00_14	YKR029C	SET3	0.322188	0.402091	0.378039	0.259735	no	yes	no	yes
YKR032W::chr11_3	YKR032W	YKR032W	0.250088	0.0389013	0.419066	0.431664	yes	no	yes	no
YKR033C::chr11_3	YKR033C	YKR033C	0.627057	-0.0106875	0.223525	0.45712	yes	no	yes	no
YKR035W-A::chr00_3	YKR035W-A	DID2	1.24507	-1.15508	0.0472663	0.916148	yes	no	yes	no
YKR039W::chr00_14	YKR039W	GAP1	1.02783	0.746641	0.0882664	0.137426	no	no	no	no
YKR041W::chr00_14	YKR041W	YKR041W	0.782445	0.0208866	0.161197	0.440884	no	no	no	no
YKR042W::chr11_3	YKR042W	UTH1	-0.805516	0.356287	0.911942	0.279397	no	yes	no	yes
YKR043C::chr11_3	YKR043C	SHB17	0.174183	-0.377996	0.463222	0.644191	no	no	no	no
YKR044W::chr11_3	YKR044W	UIP5	1.1324	-0.128596	0.0660642	0.518165	no	no	no	no
YKR045C::chr11_3	YKR045C	YKR045C	0.294482	0.0917322	0.393669	0.404854	yes	no	yes	no
YKR046C::chr00_14	YKR046C	PET10	-0.012741	-0.409198	0.572762	0.659183	no	no	no	no
YKR049C::chr11_3	YKR049C	FMP46	0.496476	0.616841	0.285111	0.177935	no	no	no	no
YKR050W::chr11_3	YKR050W	TRK2	0.810379	0.911193	0.151328	0.0958071	no	no	no	no
YKR051W::chr11_3	YKR051W	YKR051W	1.01916	0.835646	0.0903309	0.113594	no	no	no	no
YKR052C::chr11_3	YKR052C	MRS4	-0.904703	-1.0218	0.933079	0.886169	no	no	no	no
YKR053C::chr00_14	YKR053C	YSR3	-0.939994	-0.47668	0.939571	0.690736	no	no	no	no
YKR054C::chr11_3	YKR054C	DYN1	-0.0258009	0.661363	0.580305	0.163265	no	yes	no	yes
YKR055W::chr11_3	YKR055W	RHO4	0.400375	-0.362124	0.335066	0.636476	no	no	no	no
YKR057W::chr11_3	YKR057W	RPS21A	-0.297457	1.08639	0.726874	0.0625749	no	no	no	no
YKR059W::chr11_3	YKR059W	TIF1	-0.50353	0.370182	0.817892	0.273357	no	yes	no	yes
YKR060W::chr11_3	YKR060W	UTP30	1.06989	0.997497	0.0787454	0.0780977	no	no	no	no
YKR066C::chr00_3	YKR066C	CCP1	-0.632809	-0.750147	0.86391	0.803267	no	no	no	no
YKR067W::chr00_3	YKR067W	GPT2	0.583205	0.110965	0.243322	0.395197	no	no	no	no
YKR069W::chr00_3	YKR069W	MET1	-1.3555	-0.587159	0.984771	0.739408	no	no	no	no
YKR070W::chr00_3	YKR070W	YKR070W	-0.548415	-0.695976	0.834865	0.783171	no	no	no	no
YKR074W::chr00_3	YKR074W	AIM29	0.887228	2.34461	0.126288	0.000765452	no	yes	no	yes
YKR075C::chr00_3	YKR075C	YKR075C	1.35163	0.784427	0.0336896	0.126921	yes	no	yes	no
YKR076W::chr00_3	YKR076W	ECM4	1.48049	-0.357921	0.0217318	0.634423	no	no	no	no
YKR077W::chr00_3	YKR077W	MSA2	-0.886526	-1.3262	0.929531	0.945425	no	no	no	no
YKR080W::chr00_3	YKR080W	MTD1	-0.1313	-0.579676	0.639938	0.73624	no	no	no	no
YKR082W::chr00_3	YKR082W	NUP133	0.707137	1.46512	0.189846	0.0213962	no	no	no	no
YKR087C::chr00_4	YKR087C	OMA1	-0.956051	-0.844604	0.942356	0.835495	no	no	no	no
YKR088C::chr00_4	YKR088C	TVP38	1.52913	0.732667	0.0182656	0.141457	no	no	no	no
YKR090W::chr00_4	YKR090W	PXL1	-0.102813	-0.0713318	0.624102	0.488482	no	no	no	no
YKR092C::chr00_4	YKR092C	SRP40	1.02734	1.27997	0.0883807	0.0371228	no	no	no	no
YKR094C::chr00_15	YKR094C	RPL40B	0.0617764	-0.436226	0.529292	0.671971	no	no	no	no
YKR095W::chr00_15	YKR095W	MLP1	0.0855616	-0.387613	0.515318	0.648837	no	no	no	no
YKR097W::chr00_4	YKR097W	PCK1	-0.72725	0.379371	0.892024	0.269398	no	yes	no	yes
YKR098C::chr00_4	YKR098C	UBP11	0.950628	0.305255	0.107926	0.302122	no	no	no	no
YKR099W::chr00_4	YKR099W	BAS1	0.0161659	1.32739	0.555974	0.0323928	no	no	no	no
YKR100C::chr00_4	YKR100C	SKG1	-0.978379	-1.40986	0.946061	0.956436	no	no	no	no
YKR101W::chr00_4	YKR101W	SIR1	-0.399827	-1.21	0.774693	0.92661	no	no	no	no
YKR102W::chr00_15	YKR102W	FLO10	0.00167015	-1.20004	0.564407	0.924791	no	no	no	no
YKR103W::chr00_4	YKR103W	NFT1	0.22316	-0.699987	0.434644	0.784698	no	no	no	no
YKR106W::chr00_17b	YKR106W	GEX2	-1.13081	-0.99465	0.966572	0.879225	no	no	no	no
YLL001W::chr12_1	YLL001W	DNM1	0.356947	-0.266441	0.35871	0.588893	no	no	no	no
YLL005C::chr12_1	YLL005C	SPO75	0.366919	0.0604281	0.353229	0.420694	no	no	no	no
YLL006W::chr12_1	YLL006W	MMM1	0.493799	1.72402	0.286453	0.00908312	no	yes	no	yes
YLL007C::chr00_10	YLL007C	YLL007C	0.352626	1.89073	0.361094	0.00495599	no	yes	no	yes
YLL009C::chr12_1	YLL009C	COX17	0.535312	1.92962	0.265982	0.00427655	no	no	no	no
YLL010C::chr12_1	YLL010C	PSR1	-0.620585	-0.807874	0.859935	0.823394	no	no	no	no
YLL012W::chr12_1	YLL012W	YEH1	0.380308	-0.0225798	0.345917	0.463255	no	no	no	no
YLL015W::chr12_1	YLL015W	BPT1	0.900342	0.243941	0.122322	0.330468	yes	no	yes	no
YLL016W::chr12_1	YLL016W	SDC25	0.274996	0.00378774	0.404768	0.449666	no	no	no	no
YLL017W::chr12_1	YLL017W	YLL017W	0.839548	0.725728	0.14146	0.143488	no	no	no	no
YLL019C::chr12_1	YLL019C	KNS1	1.33991	-0.163461	0.0350047	0.536199	yes	no	yes	no
YLL021W::chr12_1	YLL021W	SPA2	0.595178	-0.679936	0.237825	0.777	no	no	no	no
YLL024C::chr12_1	YLL024C	SSA2	-0.338436	-1.73017	0.746602	0.983292	no	no	no	no
YLL032C::chr12_1	YLL032C	YLL032C	-0.0503567	-0.77564	0.594407	0.812321	no	no	no	no
YLL033W::chr12_1	YLL033W	IRC19	1.07752	1.06529	0.0771052	0.0660213	no	no	no	no
YLL038C::chr12_1	YLL038C	ENT4	-0.239449	-0.821968	0.697709	0.828102	no	no	no	no
YLL039C::chr12_1	YLL039C	UBI4	-0.00316793	-0.76122	0.567215	0.807232	no	no	no	no
YLL041C::chr12_1	YLL041C	SDH2	-0.624919	0.487508	0.861353	0.225072	no	no	no	no
YLL042C::chr12_1	YLL042C	ATG10	0.949454	0.1692	0.108248	0.36637	no	no	no	no
YLL044W::chr00_8	YLL044W	YLL044W	-0.993648	-0.226576	0.948483	0.56863	no	no	no	no
YLL046C::chr12_1	YLL046C	RNP1	-0.180054	-0.086419	0.666478	0.496303	no	no	no	no
YLL047W::chr12_1	YLL047W	YLL047W	-0.431628	-0.412154	0.788521	0.660591	no	no	no	no
YLL048C::chr00_8	YLL048C	YBT1	1.08074	0.116159	0.076422	0.3926	no	no	no	no
YLL049W::chr00_8	YLL049W	LDB18	-1.47798	-0.0447644	0.99048	0.474722	no	no	no	no
YLL053C::chr12_1	YLL053C	YLL053C	1.38853	0.66301	0.0298115	0.162738	no	no	no	no
YLL057C::chr12_1	YLL057C	JLP1	0.0331415	-0.372206	0.546066	0.641383	no	no	no	no
YLL060C::chr12_1	YLL060C	GTT2	0.594544	-0.671915	0.238114	0.773877	no	no	no	no
YLL061W::chr12_1	YLL061W	MMP1	-0.726283	-0.0341151	0.891759	0.469215	no	no	no	no
YLL062C::chr12_1	YLL062C	MHT1	-0.302587	0.0390788	0.729385	0.431573	no	no	no	no
YLL063C::chr12_1	YLL063C	AYT1	-0.696017	-0.294215	0.883231	0.602875	no	no	no	no
YLR003C::chr12_1	YLR003C	CMS1	1.40105	-0.248074	0.0285829	0.579583	no	no	no	no
YLR004C::chr12_1	YLR004C	THI73	0.639717	1.35232	0.217985	0.0301135	no	no	no	no
YLR006C::chr12_1	YLR006C	SSK1	-0.443558	0.330919	0.793577	0.29059	no	no	no	no
YLR012C::chr12_1	YLR012C	YLR012C	-0.0890485	0.0634555	0.616373	0.419156	no	no	no	no
YLR014C::chr12_1	YLR014C	PPR1	-0.286333	0.289468	0.721391	0.309316	no	no	no	no
YLR015W::chr12_1	YLR015W	BRE2	0.0703169	0.990257	0.524278	0.0794805	no	no	no	no
YLR016C::chr12_1	YLR016C	PML1	-0.888939	-0.12959	0.930011	0.51868	no	no	no	no
YLR017W::chr12_1	YLR017W	MEU1	-0.2114	-0.161693	0.683122	0.535285	no	no	no	no
YLR018C::chr12_1	YLR018C	POM34	-0.642096	1.02143	0.866879	0.0736557	no	no	no	no
YLR019W::chr12_1	YLR019W	PSR2	-0.0262658	-0.706343	0.580573	0.787106	no	no	no	no
YLR021W::chr12_1	YLR021W	IRC25	1.36325	1.0703	0.0324254	0.0651897	yes	no	yes	no
YLR023C::chr12_1	YLR023C	IZH3	-0.42475	-0.724769	0.785573	0.793997	no	no	no	no
YLR025W::chr12_1	YLR025W	SNF7	1.40659	-1.27203	0.0280527	0.937192	yes	no	yes	no
YLR028C::chr12_1	YLR028C	ADE16	0.861521	-0.751436	0.134321	0.803731	no	no	no	no
YLR030W::chr00_8	YLR030W	YLR030W	-0.418081	-0.557233	0.782692	0.726622	no	no	no	no
YLR031W::chr00_8	YLR031W	YLR031W	-0.879762	-1.18696	0.928175	0.92235	no	no	no	no
YLR032W::chr00_8	YLR032W	RAD5	0.321407	0.254836	0.378476	0.325353	no	no	no	no
YLR034C::chr00_8	YLR034C	SMF3	-0.842873	-0.783123	0.920422	0.814929	no	no	no	no
YLR035C::chr00_8	YLR035C	MLH2	-1.07486	-1.13107	0.959951	0.911238	no	no	no	no
YLR036C::chr00_8	YLR036C	YLR036C	-1.50981	-2.27709	0.991615	0.997729	no	no	no	no
YLR037C::chr00_8	YLR037C	PAU23	0.134511	-0.987894	0.486519	0.877451	no	no	no	no
YLR038C::chr00_8	YLR038C	COX12	-0.391264	0.348429	0.770884	0.282842	no	no	no	no
YLR039C::chr00_8	YLR039C	RIC1	-0.317167	0.325886	0.736457	0.292835	no	no	no	no
YLR040C::chr00_8	YLR040C	YLR040C	-0.0618761	-0.0874706	0.600981	0.496848	no	no	no	no
YLR041W::chr00_8	YLR041W	YLR041W	-0.0816381	-0.453936	0.612192	0.680243	no	no	no	no
YLR042C::chr12_2	YLR042C	YLR042C	-0.0773914	-0.127708	0.609791	0.517705	no	no	no	no
YLR043C::chr12_2	YLR043C	TRX1	0.190589	-1.29135	0.453621	0.940232	no	no	no	no
YLR044C::chr12_2	YLR044C	PDC1	0.0187519	-0.607213	0.554467	0.747801	no	no	no	no
YLR046C::chr12_2	YLR046C	YLR046C	-2.55881	-0.897646	0.999959	0.852	no	no	no	no
YLR047C::chr12_2	YLR047C	FRE8	-0.474002	-0.962265	0.806152	0.870558	no	no	no	no
YLR049C::chr12_2	YLR049C	YLR049C	0.803031	0.607976	0.153884	0.180952	no	no	no	no
YLR050C::chr00_8	YLR050C	YLR050C	0.232757	0.0731206	0.429079	0.414255	no	no	no	no
YLR052W::chr00_8	YLR052W	IES3	0.774835	1.18665	0.163957	0.048075	no	no	no	no
YLR053C::chr12_2	YLR053C	YLR053C	0.113586	0.113586	0.49883	0.393886	yes	yes	yes	yes
YLR055C::chr12_2	YLR055C	SPT8	-0.660397	1.11505	0.872597	0.0581182	no	no	no	no
YLR057W::chr12_2	YLR057W	MNL2	0.609546	0.306504	0.231318	0.301556	no	no	no	no
YLR058C::chr12_2	YLR058C	SHM2	0.793229	1.20764	0.157338	0.0454088	no	no	no	no
YLR063W::chr12_2	YLR063W	YLR063W	-0.456561	-0.252633	0.799006	0.581899	no	no	no	no
YLR064W::chr12_2	YLR064W	PER33	-0.335031	-0.251251	0.744992	0.581197	no	no	no	no
YLR068W::chr12_2	YLR068W	FYV7	1.70421	1.85	0.00940627	0.00576938	no	yes	no	yes
YLR070C::chr12_2	YLR070C	XYL2	-0.144711	-0.3022	0.647313	0.606871	no	no	no	no
YLR072W::chr12_2	YLR072W	YLR072W	0.286047	-0.210821	0.398463	0.560569	no	no	no	no
YLR073C::chr12_2	YLR073C	RFU1	0.795513	1.07163	0.156529	0.0649703	no	no	no	no
YLR074C::chr12_2	YLR074C	BUD20	1.22991	1.22991	0.0495127	0.0427125	yes	yes	yes	yes
YLR077W::chr12_2	YLR077W	FMP25	-0.0620004	0.301523	0.601052	0.303816	no	no	no	no
YLR080W::chr12_2	YLR080W	EMP46	0.931912	0.931912	0.113134	0.0913076	yes	yes	yes	yes
YLR081W::chr12_2	YLR081W	GAL2	0.770161	-0.0496281	0.165667	0.47724	yes	no	yes	no
YLR082C::chr12_2	YLR082C	SRL2	0.962146	-0.0711999	0.104808	0.488414	no	no	no	no
YLR084C::chr12_2	YLR084C	RAX2	0.615719	0.0109331	0.228554	0.445993	no	no	no	no
YLR085C::chr12_2	YLR085C	ARP6	0.252873	-0.0941337	0.417461	0.500303	no	no	no	no
YLR089C::chr12_2	YLR089C	ALT1	0.877922	2.40278	0.129157	0.00058855	no	no	no	yes
YLR092W::chr12_2	YLR092W	SUL2	-0.137611	-0.341136	0.643415	0.626189	no	no	no	no
YLR093C::chr12_2	YLR093C	NYV1	0.818225	1.29104	0.14863	0.0359706	no	no	no	no
YLR094C::chr12_2	YLR094C	GIS3	1.03726	0.530467	0.0860589	0.208681	yes	no	yes	no
YLR095C::chr12_2	YLR095C	IOC2	0.510163	0.256046	0.278295	0.324787	no	no	no	no
YLR096W::chr12_2	YLR096W	KIN2	-0.298438	-0.332154	0.727356	0.621759	no	no	no	no
YLR097C::chr12_2	YLR097C	HRT3	1.35396	0.451094	0.0334327	0.239519	yes	no	yes	no
YLR098C::chr12_2	YLR098C	CHA4	0.920986	0.689391	0.116257	0.154445	no	no	no	no
YLR099C::chr12_2	YLR099C	ICT1	0.408057	-0.290816	0.330947	0.60117	no	no	no	no
YLR104W::chr12_2	YLR104W	LCL2	0.320537	0.451747	0.378965	0.239256	no	no	no	no
YLR107W::chr12_2	YLR107W	REX3	1.12753	0.406897	0.0669921	0.257714	no	no	no	no
YLR110C::chr00_15	YLR110C	CCW12	1.24612	0.950391	0.0471135	0.0874283	no	no	no	no
YLR111W::chr12_2	YLR111W	YLR111W	1.18308	1.18025	0.0569948	0.0489114	no	no	no	no
YLR112W::chr12_2	YLR112W	YLR112W	-0.865913	-0.794746	0.925335	0.818935	no	no	no	no
YLR118C::chr12_2	YLR118C	YLR118C	0.82163	0.485614	0.147469	0.225811	yes	no	yes	no
YLR120C::chr12_2	YLR120C	YPS1	0.498015	-0.194988	0.28434	0.552443	yes	no	yes	no
YLR122C::chr12_2	YLR122C	YLR122C	0.453166	0.750844	0.307187	0.136229	no	no	no	no
YLR123C::chr12_2	YLR123C	YLR123C	1.29488	0.591308	0.0404548	0.186712	no	no	no	no
YLR125W::chr12_2	YLR125W	YLR125W	0.734087	0.194743	0.179252	0.353949	no	no	no	no
YLR126C::chr12_3	YLR126C	YLR126C	0.857657	0.343609	0.135558	0.284965	no	no	no	no
YLR130C::chr12_3	YLR130C	ZRT2	0.998836	0.867125	0.0953104	0.105916	no	no	no	no
YLR131C::chr12_3	YLR131C	ACE2	-0.257299	-0.468602	0.706832	0.687026	no	no	no	no
YLR133W::chr12_3	YLR133W	CKI1	1.26978	0.228058	0.0437802	0.337981	no	no	no	no
YLR134W::chr12_3	YLR134W	PDC5	1.28346	1.21448	0.0419416	0.0445663	no	no	no	no
YLR135W::chr12_3	YLR135W	SLX4	0.625474	0.246341	0.224224	0.329338	no	no	no	no
YLR136C::chr12_3	YLR136C	TIS11	0.536724	0.94125	0.265299	0.0893316	no	yes	no	yes
YLR137W::chr12_3	YLR137W	RKM5	1.30657	1.11231	0.038977	0.0585335	yes	no	yes	no
YLR138W::chr12_3	YLR138W	NHA1	1.3846	1.58564	0.0302061	0.0145414	no	no	no	no
YLR139C::chr12_3	YLR139C	SLS1	1.78913	3.60127	0.00667133	7.85465e-07	no	yes	no	yes
YLR142W::chr12_3	YLR142W	PUT1	-0.232231	-0.373417	0.693984	0.641971	no	no	no	no
YLR143W::chr12_3	YLR143W	YLR143W	1.06365	1.11481	0.0801062	0.0581549	no	no	no	no
YLR149C::chr12_3	YLR149C	YLR149C	0.747434	2.32479	0.174146	0.000836091	no	no	no	yes
YLR152C::chr12_3	YLR152C	YLR152C	1.24488	0.810937	0.0472939	0.119893	no	no	no	no
YLR164W::chr12_3	YLR164W	SHH4	0.461932	0.711412	0.302658	0.147741	no	no	no	no
YLR171W::chr12_3	YLR171W	YLR171W	0.501776	0.402402	0.282462	0.259604	no	no	no	no
YLR172C::chr12_3	YLR172C	DPH5	-0.420585	-0.146674	0.783776	0.527522	no	no	no	no
YLR173W::chr12_3	YLR173W	YLR173W	0.984045	0.984045	0.09906	0.0806817	yes	yes	yes	yes
YLR177W::chr12_3	YLR177W	YLR177W	-1.36805	-1.0035	0.985467	0.881521	no	no	no	no
YLR178C::chr12_3	YLR178C	TFS1	0.465517	0.647714	0.300815	0.167677	no	no	no	no
YLR179C::chr12_3	YLR179C	YLR179C	-0.674397	-0.00987658	0.876854	0.456702	no	no	no	no
YLR180W::chr12_3	YLR180W	SAM1	-0.123731	-0.00160628	0.635753	0.452442	no	no	no	no
YLR181C::chr12_3	YLR181C	VTA1	1.4959	-0.651868	0.0205778	0.765965	yes	no	yes	no
YLR182W::chr12_3	YLR182W	SWI6	0.842267	3.22099	0.140563	8.24574e-06	no	yes	no	yes
YLR183C::chr12_3	YLR183C	TOS4	-0.0442243	-0.210066	0.590896	0.560182	no	no	no	no
YLR185W::chr12_3	YLR185W	RPL37A	0.564935	2.01414	0.251841	0.00307877	no	no	no	no
YLR187W::chr12_3	YLR187W	SKG3	-1.58167	-0.490854	0.99375	0.697198	no	no	no	no
YLR188W::chr12_3	YLR188W	MDL1	0.756712	-0.0768564	0.170652	0.491345	no	no	no	no
YLR189C::chr12_3	YLR189C	ATG26	-0.949084	0.222328	0.94116	0.340708	no	no	no	no
YLR192C::chr00_11	YLR192C	HCR1	-0.333375	1.94942	0.744207	0.00396352	no	no	no	no
YLR193C::chr12_3	YLR193C	UPS1	0.780742	1.23319	0.161812	0.0423259	no	no	no	no
YLR194C::chr12_3	YLR194C	YLR194C	0.396533	0.94156	0.337133	0.0892665	no	no	no	no
YLR199C::chr12_3	YLR199C	PBA1	1.07427	-0.352623	0.0778023	0.631831	no	no	no	no
YLR201C::chr12_3	YLR201C	COQ9	0.0325528	1.19457	0.546411	0.0470548	no	no	no	no
YLR204W::chr12_3	YLR204W	QRI5	1.54164	-1.66428	0.0174539	0.979395	yes	no	yes	no
YLR205C::chr12_3	YLR205C	HMX1	1.08262	-0.669646	0.0760252	0.772989	no	no	no	no
YLR206W::chr12_3	YLR206W	ENT2	-0.521895	-0.408041	0.824964	0.658631	no	no	no	no
YLR207W::chr12_3	YLR207W	HRD3	0.542418	-0.511366	0.262554	0.706441	no	no	no	no
YLR209C::chr12_3	YLR209C	PNP1	0.759649	0.509557	0.169555	0.21657	no	no	no	no
YLR210W::chr12_3	YLR210W	CLB4	0.722426	-1.37652	0.183789	0.952284	no	no	no	no
YLR211C::chr12_3	YLR211C	YLR211C	0.333478	0.00338283	0.371724	0.449874	no	no	no	no
YLR213C::chr12_3	YLR213C	CRR1	1.15184	0.17569	0.0624615	0.3632	no	no	no	no
YLR214W::chr12_3	YLR214W	FRE1	0.249096	-0.0984961	0.419638	0.502565	no	no	no	no
YLR216C::chr12_3	YLR216C	CPR6	0.22481	0.514737	0.433687	0.214599	no	no	no	no
YLR217W::chr12_3	YLR217W	YLR217W	0.715938	0.973166	0.186344	0.0828181	no	no	no	no
YLR219W::chr12_3	YLR219W	MSC3	-0.0808476	-0.0118622	0.611746	0.457726	no	no	no	no
YLR220W::chr12_3	YLR220W	CCC1	1.0853	0.572751	0.075461	0.193256	no	no	no	no
YLR224W::chr12_3	YLR224W	YLR224W	0.203426	-0.0567528	0.446127	0.480929	no	no	no	no
YLR225C::chr12_3	YLR225C	YLR225C	-0.045544	-0.242603	0.591652	0.576802	no	no	no	no
YLR227C::chr12_3	YLR227C	ADY4	0.861523	0.317513	0.134321	0.296588	yes	no	yes	no
YLR228C::chr12_4	YLR228C	ECM22	-0.458933	-0.0599236	0.799988	0.482571	no	no	no	no
YLR232W::chr12_4	YLR232W	YLR232W	-1.55898	0.178195	0.993135	0.361979	no	yes	no	yes
YLR233C::chr12_4	YLR233C	EST1	0.435121	0.219276	0.316602	0.342164	no	no	no	no
YLR236C::chr12_4	YLR236C	YLR236C	-0.535561	-0.365384	0.830112	0.638065	no	no	no	no
YLR238W::chr12_4	YLR238W	FAR10	-0.345651	0.17657	0.749996	0.362771	no	no	no	no
YLR239C::chr12_4	YLR239C	LIP2	-0.259414	1.36959	0.707904	0.028613	no	no	no	no
YLR241W::chr12_4	YLR241W	YLR241W	-0.547251	-0.904002	0.834438	0.8539	no	no	no	no
YLR246W::chr00_11	YLR246W	ERF2	0.100748	-0.128136	0.506385	0.517927	no	no	no	no
YLR247C::chr12_4	YLR247C	IRC20	-0.692754	-0.631554	0.882284	0.757793	no	no	no	no
YLR248W::chr12_4	YLR248W	RCK2	0.289637	0.1649	0.396421	0.368475	no	no	no	no
YLR250W::chr12_4	YLR250W	SSP120	0.572179	-0.0192991	0.248445	0.461562	no	no	no	no
YLR253W::chr12_4	YLR253W	YLR253W	0.92705	-0.706981	0.114516	0.787347	no	no	no	no
YLR254C::chr12_4	YLR254C	NDL1	-0.782935	-0.912243	0.9065	0.85634	no	no	no	no
YLR255C::chr12_4	YLR255C	YLR255C	0.37113	-0.455551	0.350923	0.680993	no	no	no	no
YLR258W::chr12_4	YLR258W	GSY2	-0.310304	0.450308	0.73314	0.239837	no	no	no	no
YLR260W::chr12_4	YLR260W	LCB5	0.275126	1.57698	0.404693	0.0149612	no	no	no	no
YLR261C::chr12_4	YLR261C	VPS63	0.950519	2.04932	0.107956	0.00267645	no	no	no	no
YLR262C-A::chr00_4	YLR262C-A	TMA7	0.0801628	-0.597702	0.518492	0.743838	yes	no	yes	no
YLR263W::chr12_4	YLR263W	RED1	0.277323	-0.266265	0.403438	0.588804	no	no	no	no
YLR264W::chr12_4	YLR264W	RPS28B	0.616392	0.743119	0.228253	0.138434	no	no	no	no
YLR265C::chr12_4	YLR265C	NEJ1	-0.0599063	-1.10732	0.599859	0.906173	no	no	no	no
YLR266C::chr12_4	YLR266C	PDR8	0.443287	0.406425	0.312326	0.257913	no	no	no	no
YLR267W::chr12_4	YLR267W	BOP2	-0.83065	-0.797803	0.917718	0.81998	no	no	no	no
YLR269C::chr12_4	YLR269C	YLR269C	-1.0146	1.05093	0.951667	0.0684503	no	no	no	no
YLR278C::chr12_4	YLR278C	YLR278C	0.469322	-0.283992	0.298864	0.597743	no	no	no	no
YLR280C::chr12_4	YLR280C	YLR280C	-0.155866	-0.722794	0.653405	0.793265	no	no	no	no
YLR281C::chr12_4	YLR281C	YLR281C	0.252888	0.505485	0.417453	0.218126	no	no	no	no
YLR282C::chr12_4	YLR282C	YLR282C	1.11394	0.195446	0.0696332	0.353609	no	no	no	no
YLR283W::chr12_4	YLR283W	YLR283W	0.012728	-0.0221405	0.557976	0.463028	no	no	no	no
YLR284C::chr12_4	YLR284C	ECI1	-1.46283	-0.449024	0.989894	0.677957	no	no	no	no
YLR286C::chr00_12	YLR286C	CTS1	-0.0539968	-1.26791	0.596487	0.936529	no	no	no	no
YLR287C-A::chr12_4	YLR287C-A	RPS30A	1.23401	2.05021	0.0488973	0.00266694	no	no	no	no
YLR288C::chr12_4	YLR288C	MEC3	-0.476078	-0.245012	0.806993	0.578027	no	no	no	no
YLR290C::chr12_4	YLR290C	YLR290C	-0.299146	-1.0419	0.727702	0.891124	no	no	no	no
YLR292C::chr12_4	YLR292C	SEC72	-0.233569	-0.395578	0.694676	0.652668	no	no	no	no
YLR295C::chr12_4	YLR295C	ATP14	0.26224	1.28718	0.412075	0.0363692	no	yes	no	yes
YLR296W::chr12_4	YLR296W	YLR296W	-1.14246	-0.467228	0.967832	0.686393	no	no	no	no
YLR297W::chr12_4	YLR297W	YLR297W	-1.34175	-1.2887	0.983975	0.939823	no	no	no	no
YLR300W::chr12_4	YLR300W	EXG1	0.349276	-0.0437161	0.362947	0.47418	no	no	no	no
YLR303W::chr12_4	YLR303W	MET17	0.174358	-1.25178	0.46312	0.933877	no	no	no	no
YLR306W::chr12_4	YLR306W	UBC12	0.895578	-0.108209	0.123752	0.5076	no	no	no	no
YLR309C::chr12_4	YLR309C	IMH1	0.15932	-0.142391	0.47194	0.525307	no	no	no	no
YLR311C::chr12_4	YLR311C	YLR311C	-0.709499	-1.35518	0.887087	0.949464	no	no	no	no
YLR312C::chr12_4	YLR312C	YLR312C	0.60764	-0.300423	0.232176	0.605983	yes	no	yes	no
YLR312W-A::chr12_4	YLR312W-A	MRPL15	-0.204807	1.53894	0.67965	0.0169327	no	no	no	no
YLR313C::chr12_4	YLR313C	SPH1	-0.177124	-0.213822	0.664905	0.562107	no	no	no	no
YLR315W::chr12_4	YLR315W	NKP2	1.38598	1.92408	0.0300673	0.00436785	no	yes	no	yes
YLR318W::chr12_4	YLR318W	EST2	0.0659277	-0.0745928	0.526855	0.490172	no	no	no	no
YLR322W::chr12_4	YLR322W	VPS65	1.23998	0.885152	0.0480116	0.101691	no	no	no	no
YLR324W::chr12_5	YLR324W	PEX30	-0.0625488	-0.291048	0.601364	0.601287	no	no	no	no
YLR325C::chr12_5	YLR325C	RPL38	-0.814849	0.876004	0.914122	0.103819	no	no	no	no
YLR326W::chr12_5	YLR326W	YLR326W	0.190423	-0.971615	0.453718	0.873103	no	no	no	no
YLR327C::chr12_5	YLR327C	TMA10	-0.685881	-0.320067	0.880271	0.615772	no	no	no	no
YLR329W::chr12_5	YLR329W	REC102	-0.679187	-1.13426	0.878288	0.911904	no	no	no	no
YLR331C::chr12_5	YLR331C	JIP3	0.36039	-0.718119	0.356814	0.791525	no	no	no	no
YLR332W::chr12_5	YLR332W	MID2	1.06365	0.190086	0.0801062	0.356202	no	no	no	no
YLR334C::chr00_11	YLR334C	YLR334C	-1.09941	-0.89953	0.962977	0.852565	no	no	no	no
YLR335W::chr12_5	YLR335W	NUP2	-0.625108	-0.899521	0.861415	0.852562	no	no	no	no
YLR341W::chr12_5	YLR341W	SPO77	0.416765	0.1702	0.326303	0.365881	no	no	no	no
YLR342W::chr12_5	YLR342W	FKS1	-0.273986	2.74497	0.715243	0.000112528	no	no	no	yes
YLR343W::chr00_12	YLR343W	GAS2	-1.10314	-0.464859	0.96342	0.685301	no	no	no	no
YLR344W::chr12_5	YLR344W	RPL26A	-0.22009	-0.244641	0.687673	0.577838	no	no	no	no
YLR345W::chr12_5	YLR345W	YLR345W	1.10547	1.02801	0.071318	0.0724704	no	no	no	no
YLR346C::chr00_11	YLR346C	YLR346C	-0.298853	-0.859128	0.727559	0.840129	no	no	no	no
YLR348C::chr12_5	YLR348C	DIC1	0.549637	-0.734825	0.259094	0.797701	no	no	no	no
YLR349W::chr12_5	YLR349W	YLR349W	1.33991	0.582117	0.0350047	0.189935	yes	no	yes	no
YLR350W::chr12_5	YLR350W	ORM2	1.21765	0.924502	0.0513917	0.0928984	no	no	no	no
YLR351C::chr12_5	YLR351C	NIT3	0.24507	-1.71523	0.42196	0.982468	yes	no	yes	no
YLR354C::chr12_5	YLR354C	TAL1	0.289105	0.353587	0.396724	0.280579	no	no	no	no
YLR356W::chr12_5	YLR356W	ATG33	1.16654	0.961909	0.0598394	0.0850734	no	no	no	no
YLR360W::chr12_5	YLR360W	VPS38	-0.56832	-2.07658	0.842053	0.995021	no	no	no	no
YLR361C::chr00_11	YLR361C	DCR2	-0.730945	-1.0996	0.893032	0.904482	no	no	no	no
YLR363C::chr12_5	YLR363C	NMD4	0.928786	0.449666	0.114022	0.240096	yes	no	yes	no
YLR364W::chr12_5	YLR364W	GRX8	0.142689	-0.352815	0.48171	0.631925	no	no	no	no
YLR366W::chr12_5	YLR366W	YLR366W	-0.151505	-0.0755468	0.651028	0.490667	no	no	no	no
YLR367W::chr12_5	YLR367W	RPS22B	0.939372	1.25509	0.111037	0.0398212	no	yes	no	yes
YLR368W::chr12_5	YLR368W	MDM30	0.704434	1.49895	0.190929	0.0192405	no	no	no	no
YLR371W::chr12_5	YLR371W	ROM2	0.473976	0.37207	0.296485	0.272541	no	no	no	no
YLR372W::chr12_5	YLR372W	SUR4	1.26701	3.03799	0.0441602	2.35144e-05	no	yes	no	yes
YLR374C::chr12_5	YLR374C	YLR374C	0.472537	2.91055	0.29722	4.72517e-05	no	no	no	yes
YLR375W::chr12_5	YLR375W	STP3	-0.538047	1.61316	0.831038	0.0132729	no	no	no	no
YLR377C::chr12_5	YLR377C	FBP1	0.310123	1.40341	0.384823	0.0258559	no	no	no	no
YLR380W::chr12_5	YLR380W	CSR1	1.15782	0.41686	0.0613838	0.253551	no	no	no	no
YLR381W::chr12_5	YLR381W	CTF3	-0.127661	-0.684847	0.637928	0.7789	no	no	no	no
YLR382C::chr00_11	YLR382C	NAM2	0.798076	3.02303	0.155624	2.55564e-05	no	no	no	yes
YLR385C::chr12_5	YLR385C	SWC7	0.828532	-0.184574	0.145134	0.547085	no	no	no	no
YLR386W::chr12_5	YLR386W	VAC14	1.14894	1.14894	0.0629884	0.053176	yes	yes	yes	yes
YLR387C::chr12_5	YLR387C	REH1	-0.580955	-0.623613	0.846507	0.754557	no	no	no	no
YLR390W-A::chr00_15	YLR390W-A	CCW14	0.512018	0.689065	0.277377	0.154546	no	no	no	no
YLR390W::chr12_5	YLR390W	ECM19	0.694146	0.0432633	0.195087	0.429436	no	no	no	no
YLR391W::chr12_5	YLR390W-A	CCW14	0.030437	0.960892	0.547647	0.0852793	no	no	no	no
YLR392C::chr12_5	YLR392C	ART10	-1.85414	-1.2689	0.998132	0.936688	no	no	no	no
YLR395C::chr12_5	YLR395C	COX8	-0.687117	-0.385296	0.880635	0.647719	no	no	no	no
YLR398C::chr12_5	YLR398C	SKI2	-0.367898	0.244348	0.760308	0.330276	no	no	no	no
YLR402W::chr12_5	YLR402W	YLR402W	0.356243	1.01612	0.359098	0.0746238	no	no	no	no
YLR404W::chr12_5	YLR404W	FLD1	0.384846	-0.517998	0.343451	0.709401	no	no	no	no
YLR407W::chr12_5	YLR407W	YLR407W	-1.00891	-1.21549	0.950818	0.927599	no	no	no	no
YLR408C::chr12_5	YLR408C	BLS1	0.683789	-0.69592	0.199327	0.783149	yes	no	yes	no
YLR410W::chr12_5	YLR410W	VIP1	0.255088	-0.199369	0.416186	0.554694	yes	no	yes	no
YLR412W::chr12_5	YLR412W	BER1	1.45737	-0.0799413	0.0235654	0.492945	yes	no	yes	no
YLR413W::chr12_5	YLR413W	YLR413W	-0.591257	-0.109182	0.850077	0.508104	no	no	no	no
YLR414C::chr12_5	YLR414C	PUN1	1.02722	0.521172	0.0884098	0.212167	no	no	no	no
YLR415C::chr12_5	YLR415C	YLR415C	-0.403879	0.365266	0.776483	0.275487	no	no	no	no
YLR416C::chr12_5	YLR416C	YLR416C	-0.29	-0.0892411	0.723205	0.497766	no	no	no	no
YLR418C::chr12_5	YLR418C	CDC73	-0.19082	-0.149157	0.672234	0.528806	no	no	no	no
YLR420W::chr12_3	YLR420W	URA4	1.61999	0.300551	0.0130407	0.304257	no	no	no	no
YLR421C::chr12_5	YLR421C	RPN13	0.563006	-1.08066	0.25275	0.900236	no	no	no	no
YLR425W::chr00_4	YLR425W	TUS1	1.59108	3.48784	0.0145419	1.62326e-06	no	no	no	yes
YLR426W::chr00_4	YLR426W	TDA5	-0.16661	1.21283	0.659236	0.0447691	no	no	no	no
YLR428C::chr00_4	YLR428C	YLR428C	-0.605223	-0.689989	0.854828	0.780879	no	no	no	no
YLR429W::chr00_4	YLR429W	CRN1	0.214589	-0.229169	0.439625	0.569954	yes	no	yes	no
YLR431C::chr00_4	YLR431C	ATG23	0.693579	0.805148	0.195317	0.121404	no	no	no	no
YLR432W::chr00_4	YLR432W	IMD3	0.275936	-0.593789	0.404231	0.742199	no	no	no	no
YLR433C::chr00_4	YLR433C	CNA1	0.796174	0.449739	0.156295	0.240067	no	no	no	no
YLR435W::chr00_4	YLR435W	TSR2	1.47891	1.47891	0.0218537	0.020494	yes	yes	yes	yes
YLR437C::chr00_4	YLR437C	DIF1	1.21109	0.498467	0.0524192	0.220823	no	no	no	no
YLR438W::chr00_4	YLR438W	CAR2	0.317103	0.866417	0.380893	0.106084	no	no	no	no
YLR444C::chr00_4	YLR444C	YLR444C	0.550704	0.692098	0.258585	0.15361	no	no	no	no
YLR445W::chr00_4	YLR445W	GMC2	1.104	0.833705	0.0716153	0.11408	no	no	no	no
YLR446W::chr00_4	YLR446W	YLR446W	0.567279	0.146025	0.250739	0.377762	no	no	no	no
YLR449W::chr00_4	YLR449W	FPR4	1.06787	-0.0342513	0.0791847	0.469285	no	no	no	no
YLR450W::chr00_4	YLR450W	HMG2	-0.954597	-1.53903	0.942108	0.969853	no	no	no	no
YLR451W::chr12_3	YLR451W	LEU3	-0.0824235	-0.153261	0.612636	0.530929	no	no	no	no
YLR453C::chr00_4	YLR453C	RIF2	0.360719	-0.523585	0.356633	0.711884	no	no	no	no
YLR454W::chr00_4	YLR454W	FMP27	0.690819	-0.0964633	0.196443	0.501511	no	no	no	no
YLR455W::chr00_15	YLR455W	YLR455W	0.307216	0.282951	0.386462	0.312307	no	no	no	no
YLR456W::chr00_4	YLR456W	YLR456W	0.109737	0.670244	0.501095	0.160436	no	no	no	no
YLR460C::chr00_4	YLR460C	YLR460C	-0.743978	-1.18491	0.896533	0.921962	no	no	no	no
YLR461W::chr00_4	YLR461W	PAU4	0.359211	-0.0880676	0.357463	0.497158	no	no	no	no
YML001W::chr13_2	YML001W	YPT7	0.99792	1.17556	0.0955396	0.0495324	no	yes	no	yes
YML002W::chr13_2	YML002W	YML002W	-0.414943	-0.945539	0.781329	0.865916	no	no	no	no
YML003W::chr13_2	YML003W	YML003W	0.36264	-0.669171	0.355577	0.772803	no	no	no	no
YML004C::chr13_2	YML004C	GLO1	-0.249533	-0.00906375	0.702878	0.456283	no	no	no	no
YML007W::chr13_2	YML007W	YAP1	0.437311	-0.712027	0.315453	0.789246	no	no	no	no
YML008C::chr13_2	YML008C	ERG6	0.296404	1.83332	0.392579	0.00613523	no	no	no	no
YML009C::chr00_4	YML009C	MRPL39	0.109905	0.718423	0.500996	0.145648	no	no	no	no
YML009C::chr13_2	YML009C	MRPL39	-0.0319076	-0.719632	0.583822	0.792089	no	no	no	no
YML010C-B::chr00_4	YML009C-A	YML009C-A	0.894629	1.52662	0.124039	0.017617	no	no	no	no
YML011C::chr13_2	YML011C	RAD33	-0.517227	-0.699692	0.823183	0.784586	no	no	no	no
YML012W::chr13_2	YML012W	ERV25	1.36622	-0.0369397	0.0321092	0.470675	no	no	no	no
YML014W::chr13_2	YML014W	TRM9	1.48923	1.01388	0.0210714	0.0750366	no	no	no	no
YML016C::chr13_2	YML016C	PPZ1	-0.396565	2.60289	0.773246	0.000228788	no	no	no	yes
YML017W::chr13_2	YML017W	PSP2	0.698548	0.0670762	0.193301	0.417319	yes	no	yes	no
YML019W::chr13_2	YML019W	OST6	-0.423238	-0.579212	0.784922	0.736043	no	no	no	no
YML020W::chr13_2	YML020W	YML020W	-0.338533	-0.105724	0.746648	0.506312	no	no	no	no
YML021C::chr00_4	YML021C	UNG1	0.338879	-0.246924	0.368716	0.578999	no	no	no	no
YML022W::chr00_11	YML022W	APT1	0.953607	0.888361	0.107113	0.100952	yes	no	yes	no
YML024W::chr13_2	YML024W	RPS17A	1.12943	2.75788	0.066629	0.00010533	no	yes	no	yes
YML026C::chr13_2	YML026C	RPS18B	1.62784	2.20945	0.0126573	0.0013808	no	yes	no	yes
[truncated: 2,050 more rows]

## Sheet: flight
Strain	ORF	Gene	Log2ratio, 14G	Log2ratio, 21G	P, 14G	P, 21G	Drops out, 14G	Drops out, 21G	Significant, 14G	Significant, 21G
YAL002W::chr1_1	YAL002W	VPS8	1.47138	0.967316	0.00483865	0.0229039	no	no	no	no
YAL004W::chr1_1	YAL004W	YAL004W	1.21013	0.554925	0.01869	0.148748	no	no	no	no
YAL005C::chr1_1	YAL005C	SSA1	0.0789353	-0.287202	0.542789	0.818337	no	no	no	no
YAL007C::chr1_1	YAL007C	ERP2	-0.186224	0.0107919	0.732565	0.586564	no	no	no	no
YAL008W::chr1_1	YAL008W	FUN14	0.691597	0.0757028	0.140486	0.527243	no	no	no	no
YAL009W::chr1_1	YAL009W	SPO7	-0.722504	-0.592051	0.95138	0.946872	no	no	no	no
YAL011W::chr1_1	YAL011W	SWC3	0.444346	1.47032	0.274364	0.000782361	no	no	no	yes
YAL012W::chr00_12	YAL012W	CYS3	0.656497	0.656497	0.156196	0.10078	yes	yes	yes	yes
YAL013W::chr1_1	YAL013W	DEP1	-0.0690917	-0.1902	0.65318	0.753116	no	no	no	no
YAL014C::chr1_1	YAL014C	SYN8	-0.654925	-0.135086	0.936694	0.711118	no	no	no	no
YAL015C::chr1_1	YAL015C	NTG1	-0.100614	0.490536	0.675417	0.186021	no	no	no	no
YAL017W::chr1_1	YAL017W	PSK1	-0.322116	0.154085	0.811534	0.454921	no	no	no	no
YAL018C::chr1_1	YAL018C	YAL018C	-0.0801627	-0.010537	0.661055	0.605698	no	no	no	no
YAL019W::chr1_1	YAL019W	FUN30	0.753934	-0.0317816	0.115308	0.624507	no	no	no	no
YAL020C::chr1_1	YAL020C	ATS1	-0.117021	0.471943	0.686754	0.197778	no	no	no	no
YAL021C::chr1_1	YAL021C	CCR4	0.473233	0.748128	0.256051	0.0681924	no	yes	no	yes
YAL022C::chr1_1	YAL022C	FUN26	0.482199	0.343617	0.2505	0.290369	no	no	no	no
YAL023C::chr1_1	YAL023C	PMT2	-0.412951	-0.345758	0.855278	0.851918	no	no	no	no
YAL026C::chr1_1	YAL026C	DRS2	-0.279577	-0.00690695	0.788505	0.602458	no	no	no	no
YAL027W::chr1_1	YAL027W	SAW1	0.030288	0.414877	0.579887	0.236568	no	no	no	no
YAL028W::chr1_1	YAL028W	FRT2	-0.11287	0.0553238	0.683902	0.545996	no	no	no	no
YAL029C::chr1_1	YAL029C	MYO4	-0.209709	0.0491861	0.747306	0.551626	no	no	no	no
YAL030W::chr1_1	YAL030W	SNC1	0.184219	0.225978	0.46165	0.389822	no	no	no	no
YAL031C::chr1_1	YAL031C	GIP4	0.00636537	0.0230077	0.597893	0.575508	no	no	no	no
YAL034C::chr1_1	YAL034C	FUN19	1.13132	0.411914	0.0268611	0.23869	no	no	no	no
YAL036C::chr1_1	YAL036C	RBG1	-0.385723	-0.215079	0.84295	0.770945	no	no	no	no
YAL037W::chr1_1	YAL037W	YAL037W	0.584334	0.722597	0.191995	0.0763232	no	no	no	no
YAL042W::chr1_1	YAL042W	ERV46	-0.0614284	-0.338836	0.64769	0.84818	no	no	no	no
YAL043C-A::chr1_1	YAL042C-A	YAL042C-A	0.678328	0.813048	0.146294	0.0505251	no	no	no	no
YAL044C::chr1_1	YAL044C	GCV3	0.231461	-0.673567	0.425557	0.964392	no	no	no	no
YAL045C::chr1_1	YAL045C	YAL045C	1.50615	0.610723	0.00397215	0.120783	no	no	no	no
YAL046C::chr1_1	YAL046C	AIM1	-0.281534	-0.0909258	0.789599	0.675212	no	no	no	no
YAL048C::chr1_1	YAL048C	GEM1	1.06475	0.540502	0.0359112	0.15663	no	no	no	no
YAL049C::chr1_1	YAL049C	AIM2	-0.141484	0.295163	0.703333	0.329948	no	no	no	no
YAL051W::chr1_1	YAL051W	OAF1	-0.14498	-0.191939	0.705669	0.754386	no	no	no	no
YAL053W::chr1_1	YAL053W	FLC2	0.792769	-0.188775	0.101345	0.752073	no	no	no	no
YAL055W::chr1_1	YAL055W	PEX22	0.227393	0.348647	0.428644	0.286391	no	no	no	no
YAL056W::chr1_1	YAL056W	GPB2	1.88397	0.369903	0.000355145	0.269873	no	no	yes	no
YAL058W::chr1_1	YAL058W	CNE1	-0.353675	-0.208854	0.827577	0.766553	no	no	no	no
YAL059W::chr1_1	YAL059W	ECM1	0.954578	0.70108	0.0562506	0.0837319	yes	no	yes	no
YAL060W::chr1_1	YAL060W	BDH1	-0.361699	-0.348202	0.831514	0.853222	no	no	no	no
YAL061W::chr1_1	YAL061W	BDH2	-0.190721	0.158637	0.735422	0.450743	no	no	no	no
YAL062W::chr1_1	YAL062W	GDH3	-0.421933	-0.363364	0.859199	0.861145	no	no	no	no
YAL064C-A::chr00_1	YAL064C-A	TDA8	0.0949521	0.423272	0.530477	0.230612	no	no	no	no
YAL065C::chr1_1	YAL065C	YAL065C	1.62479	0.884164	0.00196314	0.0355741	no	no	no	no
YAL066W::chr1_1	YAL066W	YAL066W	0.0189274	0.495281	0.588461	0.183091	no	no	no	no
YAL067C::chr1_1	YAL067C	SEO1	0.720488	0.164892	0.128388	0.445013	no	no	no	no
YAL068C::chr1_1	YAL068C	PAU8	-0.107714	-0.267616	0.680344	0.806116	no	no	no	no
YAR002C-A::chr00_16a	YAR002C-A	ERP1	-0.270961	0.103115	0.783647	0.501931	no	no	no	no
YAR002W::chr1_1	YAR002W	NUP60	1.36319	0.441367	0.00870859	0.218063	no	no	no	no
YAR003W::chr1_1	YAR003W	SWD1	-0.396462	0.430001	0.847892	0.225899	no	no	no	no
YAR014C::chr1_1	YAR014C	BUD14	-0.0153549	-0.199999	0.614065	0.760226	no	no	no	no
YAR015W::chr1_1	YAR015W	ADE1	0.138078	1.04769	0.497213	0.0145051	no	yes	no	yes
YAR018C::chr1_1	YAR018C	KIN3	1.01861	0.149873	0.0435435	0.458791	no	no	no	no
YAR020C::chr1_1	YAR020C	PAU7	1.19183	0.050337	0.0203695	0.550571	no	no	no	no
YAR023C::chr1_1	YAR023C	YAR023C	-0.254815	-0.229413	0.774372	0.78088	no	no	no	no
YAR027W::chr1_1	YAR027W	UIP3	0.632829	0.251513	0.167419	0.367328	no	no	no	no
YAR028W::chr1_1	YAR028W	YAR028W	0.820658	0.159051	0.0921067	0.450364	no	no	no	no
YAR029W::chr1_1	YAR029W	YAR029W	-0.281636	0.234996	0.789656	0.381831	no	no	no	no
YAR030C::chr1_1	YAR030C	YAR030C	-0.0373823	0.0554279	0.630266	0.545901	no	no	no	no
YAR031W::chr1_1	YAR031W	PRM9	1.26314	0.295746	0.0144746	0.329459	no	no	no	no
YAR035W::chr1_1	YAR035W	YAT1	0.43427	0.0674105	0.280901	0.534884	no	no	no	no
YAR037W::chr1_1	not found	YAR037W	0.397441	0.218215	0.305412	0.396737	no	no	no	no
YAR040C::chr1_1	not found	YAR040C	-0.036751	0.0971825	0.629804	0.507413	no	no	no	no
YAR042W::chr1_1	YAR042W	SWH1	1.13449	-0.154563	0.0264824	0.726338	no	no	no	no
YAR043C::chr1_1	deleted	YAR043C	1.18519	0.583769	0.0210098	0.133793	yes	no	yes	no
YAR047C::chr1_1	YAR047C	YAR047C	-0.125447	0.138638	0.69251	0.469132	no	no	no	no
YBL001C::chr2_1	YBL001C	ECM15	0.841751	-0.147742	0.0855449	0.721053	no	no	no	no
YBL005W::chr2_1	YBL005W	PDR3	0.317702	0.499976	0.361448	0.18022	no	no	no	no
YBL009W::chr2_1	YBL009W	ALK2	0.992546	0.876551	0.0484044	0.0369773	yes	no	yes	no
YBL010C::chr2_1	YBL010C	YBL010C	0.535294	0.212979	0.218973	0.401421	no	no	no	no
YBL011W::chr2_1	YBL011W	SCT1	0.679956	-0.284036	0.145573	0.816394	yes	no	yes	no
YBL013W::chr2_1	YBL013W	FMT1	-0.218066	-0.231806	0.752447	0.782515	no	no	no	no
YBL015W::chr2_1	YBL015W	ACH1	0.294402	-0.190298	0.37847	0.753188	no	no	no	no
YBL017C::chr2_1	YBL017C	PEP1	0.249322	0.062937	0.412055	0.539	yes	no	yes	no
YBL024W::chr2_1	YBL024W	NCL1	-0.143666	-0.254721	0.704792	0.797802	no	no	no	no
YBL027W::chr2_1	YBL027W	RPL19B	0.717652	0.806162	0.129542	0.052206	no	no	no	no
YBL028C::chr2_1	YBL028C	YBL028C	-0.166278	-0.736686	0.719714	0.974431	no	no	no	no
YBL031W::chr2_1	YBL031W	SHE1	0.958179	-0.215738	0.0554659	0.771408	no	no	no	no
YBL036C::chr2_1	YBL036C	YBL036C	0.537041	-0.471067	0.217976	0.909059	no	no	no	no
YBL037W::chr2_1	YBL037W	APL3	-0.381939	-0.271295	0.841183	0.808448	no	no	no	no
YBL039C::chr2_1	YBL039C	URA7	1.26492	0.885889	0.014349	0.0352623	yes	no	yes	no
YBL043W::chr2_1	YBL043W	ECM13	1.05573	0.340157	0.0373102	0.293121	no	no	no	no
YBL044W::chr2_1	YBL044W	YBL044W	0.868718	0.127613	0.0776735	0.479299	no	no	no	no
YBL048W::chr2_1	YBL048W	RRT1	0.0268468	-0.230059	0.582488	0.781322	no	no	no	no
YBL049W::chr2_1	YBL049W	MOH1	0.357756	0.0572234	0.332834	0.544252	no	no	no	no
YBL053W::chr2_1	YBL053W	YBL053W	0.426199	-0.367868	0.28619	0.863442	yes	no	yes	no
YBL054W::chr2_1	YBL054W	TOD6	-0.518438	-0.0683075	0.896792	0.656141	no	no	no	no
YBL057C::chr2_1	YBL057C	PTH2	0.162126	0.232624	0.478657	0.383929	no	no	no	no
YBL061C::chr2_1	YBL061C	SKT5	0.0142944	0.0386077	0.591946	0.561304	no	no	no	no
YBL062W::chr2_1	YBL062W	YBL062W	0.116645	-0.220311	0.513756	0.7746	no	no	no	no
YBL063W::chr2_1	YBL063W	KIP1	0.119368	0.352268	0.511655	0.283544	no	no	no	no
YBL066C::chr2_1	YBL066C	SEF1	0.656497	-0.0917665	0.156196	0.675913	yes	no	yes	no
YBL067C::chr2_1	YBL067C	UBP13	0.489339	0.124338	0.246125	0.482323	no	no	no	no
YBL068W::chr2_1	YBL068W	PRS4	0.34732	0.583741	0.340204	0.133807	no	yes	no	yes
YBL069W::chr2_1	YBL069W	AST1	1.1687	0.330242	0.0226737	0.301072	yes	no	yes	no
YBL070C::chr2_1	YBL070C	YBL070C	0.88642	0.335048	0.0728136	0.297206	no	no	no	no
YBL071C::chr2_1	YBL071C	YBL071C	0.596913	0.704282	0.185418	0.0825963	no	no	no	no
YBL072C::chr2_1	YBL072C	RPS8A	0.896488	0.295746	0.0701552	0.329459	no	no	no	no
YBL075C::chr2_1	YBL075C	SSA3	0.11383	0.0141547	0.515928	0.583527	no	no	no	no
YBL078C::chr2_1	YBL078C	ATG8	0.641307	-0.411195	0.163341	0.884207	no	no	no	no
YBL079W::chr2_1	YBL079W	NUP170	1.11507	0.338058	0.0288721	0.294796	no	no	no	no
YBL082C::chr2_1	YBL082C	ALG3	-0.044432	-0.326105	0.635404	0.841143	no	no	no	no
YBL083C::chr2_1	YBL083C	YBL083C	0.915584	-0.0879363	0.065319	0.672716	yes	no	yes	no
YBL085W::chr2_1	YBL085W	BOI1	0.426199	-0.175223	0.28619	0.742035	yes	no	yes	no
YBL086C::chr2_1	YBL086C	YBL086C	-0.118343	0.516655	0.687661	0.170254	no	no	no	no
YBL087C::chr2_1	YBL087C	RPL23A	0.11993	-0.486152	0.511221	0.914645	no	no	no	no
YBL089W::chr2_1	YBL089W	AVT5	0.00762195	0.101955	0.596952	0.503003	no	no	no	no
YBL091C-A::chr00_1	YBL091C-A	SCS22	0.604156	0.113896	0.181695	0.491968	no	no	no	no
YBL091C::chr2_1	YBL091C	MAP2	0.150919	-0.523071	0.487301	0.927228	no	no	no	no
YBL094C::chr2_1	YBL094C	YBL094C	0.855952	0.14913	0.0813282	0.459474	no	no	no	no
YBL095W::chr2_2	YBL095W	YBL095W	1.23338	0.44522	0.0167275	0.215443	no	no	no	no
YBL096C::chr2_2	YBL096C	YBL096C	0.744596	0.358803	0.118861	0.278439	no	no	no	no
YBL098W::chr2_2	YBL098W	BNA4	0.181505	-0.0381073	0.463736	0.630053	no	no	no	no
YBL099W::chr2_2	YBL099W	ATP1	0.828076	0.77894	0.089758	0.059289	no	no	no	no
YBL100C::chr2_2	YBL100C	YBL100C	0.277835	0.753355	0.390721	0.0666131	no	no	no	no
YBL102W::chr2_2	YBL102W	SFT2	0.595699	0.0718702	0.186046	0.530776	no	no	no	no
YBL103C::chr2_2	YBL103C	RTG3	0.166086	-0.235061	0.475605	0.784726	no	no	no	no
YBL104C::chr2_2	YBL104C	SEA4	0.541609	0.0964373	0.215381	0.508101	no	no	no	no
YBL106C::chr2_2	YBL106C	SRO77	0.893671	0.00104055	0.0708912	0.59534	no	no	no	no
YBL107C::chr2_2	YBL107C	YBL107C	1.61355	0.607258	0.00210315	0.122404	no	no	no	no
YBR001C::chr2_2	YBR001C	NTH2	0.964774	0.171363	0.0540512	0.439095	no	no	no	no
YBR003W::chr2_2	YBR003W	COQ1	0.289148	0.139801	0.382343	0.46806	no	no	no	no
YBR005W::chr2_2	YBR005W	RCR1	1.55605	0.421743	0.00297066	0.23169	no	no	no	no
YBR006W::chr2_2	YBR006W	UGA2	-0.0256753	-0.208989	0.621682	0.766649	no	no	no	no
YBR007C::chr2_2	YBR007C	DSF2	0.640745	0.610611	0.163609	0.120836	no	no	no	no
YBR008C::chr2_2	YBR008C	FLR1	1.73121	0.704727	0.00100089	0.0824393	no	no	no	no
YBR009C::chr2_2	YBR009C	HHF1	1.23936	0.279616	0.0162522	0.343091	no	no	no	no
YBR010W::chr2_2	YBR010W	HHT1	0.410447	0.276138	0.296648	0.346058	no	no	no	no
YBR012C::chr2_2	YBR012C	YBR012C	0.845236	0.522236	0.0844951	0.166999	no	no	no	no
YBR013C::chr2_2	YBR013C	YBR013C	1.56925	0.55945	0.002747	0.146331	no	no	no	no
YBR014C::chr2_2	YBR014C	GRX7	0.947159	0.352592	0.057895	0.283289	no	no	no	no
YBR015C::chr2_2	YBR015C	MNN2	-1.53476	-1.98389	0.999382	0.999999	no	no	no	no
YBR016W::chr2_2	YBR016W	YBR016W	-0.123782	-0.0300036	0.691376	0.622943	no	no	no	no
YBR018C::chr2_2	YBR018C	GAL7	0.864803	0.396361	0.0787809	0.25	no	no	no	no
YBR019C::chr2_2	YBR019C	GAL10	0.973687	0.225424	0.0521847	0.390314	yes	no	yes	no
YBR021W::chr2_2	YBR021W	FUR4	0.278217	0.146705	0.390437	0.461704	no	no	no	no
YBR022W::chr2_2	YBR022W	POA1	1.03727	0.431453	0.0403121	0.224889	no	no	no	no
YBR023C::chr2_2	YBR023C	CHS3	1.81663	0.721475	0.000566441	0.0766968	no	no	yes	no
YBR024W::chr2_2	YBR024W	SCO2	0.971811	0.29782	0.0525733	0.327722	no	no	no	no
YBR025C::chr2_2	YBR025C	OLA1	1.02072	1.3829	0.0431683	0.00153867	no	no	no	no
YBR026C::chr2_2	YBR026C	ETR1	-0.479244	-0.38073	0.882511	0.869856	no	no	no	no
YBR027C::chr2_2	YBR027C	YBR027C	0.46512	0.352024	0.261129	0.283735	no	no	no	no
YBR028C::chr2_2	YBR028C	YPK3	1.30482	0.495896	0.0117619	0.182713	no	no	no	no
YBR030W::chr2_2	YBR030W	RKM3	0.834308	0.557013	0.0878192	0.147629	no	no	no	no
YBR031W::chr2_2	YBR031W	RPL4A	1.33483	1.13333	0.0100923	0.0086156	no	no	no	no
YBR032W::chr2_2	YBR032W	YBR032W	1.14548	0.266483	0.025205	0.354345	no	no	no	no
YBR033W::chr2_2	YBR033W	EDS1	-0.0433295	-0.0195251	0.634602	0.613689	no	no	no	no
YBR034C::chr2_2	YBR034C	HMT1	0.954578	0.912584	0.0562506	0.0307164	yes	no	yes	no
YBR035C::chr2_2	YBR035C	PDX3	1.20327	0.86243	0.0193059	0.0396997	no	no	no	no
YBR036C::chr2_2	YBR036C	CSG2	0.60828	-0.341684	0.179596	0.849725	no	no	no	no
YBR037C::chr2_2	YBR037C	SCO1	0.904541	0.454114	0.0680831	0.209465	no	no	no	no
YBR039W::chr2_2	YBR039W	ATP3	0.765699	-0.28446	0.110941	0.816655	no	no	no	no
YBR040W::chr2_2	YBR040W	FIG1	0.875507	0.833512	0.0757812	0.0457833	yes	no	yes	no
YBR041W::chr2_2	YBR041W	FAT1	1.72576	0.34673	0.00103704	0.287905	yes	no	yes	no
YBR042C::chr2_2	YBR042C	CST26	-0.116783	-0.124891	0.686591	0.702995	no	no	no	no
YBR043C::chr2_2	YBR043C	QDR3	0.146252	-0.428203	0.490903	0.891712	no	no	no	no
YBR045C::chr2_2	YBR045C	GIP1	0.685617	0.377949	0.143084	0.263746	no	no	no	no
YBR046C::chr2_2	YBR046C	ZTA1	0.329427	0.166398	0.352983	0.443634	no	no	no	no
YBR047W::chr2_2	YBR047W	FMP23	0.921185	0.236547	0.0639508	0.380462	no	no	no	no
YBR048W::chr2_2	YBR048W	RPS11B	1.22672	0.955151	0.0172705	0.0244777	no	no	no	no
YBR050C::chr2_2	YBR050C	REG2	1.86106	0.463914	0.00041701	0.202992	no	no	yes	no
YBR051W::chr2_2	YBR051W	YBR051W	1.08271	-1.33807	0.0332527	0.999586	no	no	no	no
YBR052C::chr2_2	YBR052C	RFS1	1.04769	1.05431	0.0385946	0.0139499	no	no	no	no
YBR053C::chr2_2	YBR053C	YBR053C	0.583741	-0.0683075	0.192309	0.656141	yes	no	yes	no
YBR054W::chr2_2	YBR054W	YRO2	0.802865	0.632132	0.0979259	0.111104	no	no	no	no
YBR057C::chr2_2	YBR057C	MUM2	0.608027	0.069196	0.179724	0.533239	no	no	no	no
YBR058C::chr2_2	YBR058C	UBP14	1.0266	0.146287	0.042136	0.462089	no	no	no	no
YBR059C::chr2_2	YBR059C	AKL1	0.116028	0.206634	0.514233	0.407116	no	no	no	no
YBR061C::chr2_2	YBR061C	TRM7	1.46723	-0.281037	0.00495276	0.814543	yes	no	yes	no
YBR062C::chr2_2	YBR062C	YBR062C	1.12903	0.337685	0.0271367	0.295094	no	no	no	no
YBR063C::chr2_2	YBR063C	YBR063C	0.333796	0.361377	0.349847	0.276441	no	no	no	no
YBR064W::chr2_2	YBR064W	YBR064W	0.492342	-0.11789	0.244297	0.697358	no	no	no	no
YBR065C::chr2_2	YBR065C	ECM2	-0.250834	-0.361666	0.772052	0.860273	no	no	no	no
YBR066C::chr2_2	YBR066C	NRG2	0.542451	0.352536	0.214905	0.283334	no	no	no	no
YBR067C::chr2_2	YBR067C	TIP1	1.46723	0.628765	0.00495276	0.112588	yes	no	yes	no
YBR068C::chr2_2	YBR068C	BAP2	0.975633	0.101618	0.0517842	0.503314	no	no	no	no
YBR069C::chr2_2	YBR069C	TAT1	0.985097	0.575549	0.0498707	0.137946	no	no	no	no
YBR071W::chr2_2	YBR071W	YBR071W	1.60293	0.350406	0.00224352	0.285007	no	no	no	no
YBR072W::chr2_2	YBR072W	HSP26	0.955429	-0.239419	0.0560644	0.787666	no	no	no	no
YBR073W::chr2_2	YBR073W	RDH54	1.04929	0.407721	0.0383358	0.241712	no	no	no	no
YBR074W::chr2_2	YBR074W	YBR074W	0.979749	0.18408	0.0509449	0.427508	no	no	no	no
YBR075W::chr2_2	YBR074W	YBR074W	0.613904	0.0218903	0.176759	0.576522	no	no	no	no
YBR076W::chr2_2	YBR076W	ECM8	1.31124	0.313838	0.0113859	0.314434	no	no	no	no
YBR077C::chr2_2	YBR077C	SLM4	1.9167	2.28084	0.000281427	2.32694e-07	no	no	yes	yes
YBR078W::chr2_2	YBR078W	ECM33	0.692906	-0.187138	0.139921	0.750872	no	no	no	no
YBR083W::chr00_16a	YBR083W	TEC1	-0.208098	-0.2907	0.746309	0.820467	no	no	no	no
YBR084C-A::chr00_16a	YBR084C-A	RPL19A	0.42244	0.398819	0.28867	0.248194	no	no	no	no
YBR084W::chr2_3	YBR084W	MIS1	-0.418103	-0.714671	0.857536	0.971238	no	no	no	no
YBR085W::chr2_3	YBR085W	AAC3	0.0414792	0.0253516	0.571403	0.57338	no	no	no	no
YBR090C-A::chr2_3	YBR089C-A	NHP6B	0.00279875	-0.0683075	0.600561	0.656141	no	no	no	no
YBR092C::chr2_3	YBR092C	PHO3	0.268648	-0.0220138	0.397562	0.615893	no	no	no	no
YBR093C::chr2_3	YBR093C	PHO5	0.650964	-0.0188388	0.158775	0.61308	no	no	no	no
YBR094W::chr2_3	YBR094W	PBY1	0.309617	0.12748	0.367326	0.479422	no	no	no	no
YBR095C::chr2_3	YBR095C	RXT2	0.350869	-0.0869232	0.337691	0.671869	no	no	no	no
YBR099C::chr2_3	YBR099C	YBR099C	1.26816	0.367792	0.014122	0.271492	no	no	no	no
YBR100W::chr2_3/chr00_16a	YBR098W	MMS4	1.02437	0.946339	0.0425252	0.0256737	no	no	no	no
YBR101C::chr2_3	YBR101C	FES1	1.08331	0.335048	0.0331662	0.297206	yes	no	yes	no
YBR103W::chr2_3	YBR103W	SIF2	1.05389	1.50712	0.037601	0.000581787	no	yes	no	yes
YBR104W::chr2_3	YBR104W	YMC2	0.493678	0.0141547	0.243486	0.583527	no	no	no	no
YBR105C::chr2_3	YBR105C	VID24	-0.180578	-0.416231	0.728958	0.886467	no	no	no	no
YBR106W::chr2_3	YBR106W	PHO88	1.32328	1.52018	0.0107084	0.000522898	no	yes	no	yes
YBR107C::chr2_3	YBR107C	IML3	-0.0713613	-0.186385	0.6548	0.750318	no	no	no	no
YBR115C::chr2_3	YBR115C	LYS2	0.480647	0.364652	0.251456	0.273909	yes	no	yes	no
YBR116C::chr2_3	YBR116C	YBR116C	0.241935	-0.15077	0.417627	0.723405	no	no	no	no
YBR120C::chr2_3	YBR120C	CBP6	0.556774	-0.380252	0.206898	0.869621	no	no	no	no
YBR125C::chr00_16a	YBR125C	PTC4	-0.195079	-0.268606	0.738174	0.806745	no	no	no	no
YBR130C::chr2_3	YBR130C	SHE3	0.55865	0.241021	0.205862	0.376521	yes	no	yes	no
YBR134W::chr2_3	YBR134W	YBR134W	-0.210204	-0.209286	0.747613	0.76686	no	no	no	no
YBR138C::chr2_3	YBR138C	YBR138C	0.708508	0.24397	0.133314	0.373929	no	no	no	no
YBR139W::chr2_3	YBR139W	YBR139W	-0.0576504	-0.46927	0.644971	0.908376	no	no	no	no
YBR141C::chr2_3	YBR141C	YBR141C	-0.283505	0.0994199	0.790698	0.505345	no	no	no	no
YBR144C::chr2_3	YBR144C	YBR144C	0.91308	0.689122	0.0659381	0.088076	no	no	no	no
YBR145W::chr2_3	YBR145W	ADH5	0.6269	0.385868	0.170311	0.257787	no	no	no	no
YBR147W::chr2_3	YBR147W	RTC2	0.529606	0.563961	0.222237	0.143947	no	no	no	no
YBR148W::chr2_3	YBR148W	YSW1	0.538039	-0.0737826	0.217408	0.660797	no	no	no	no
YBR150C::chr00_16a	YBR150C	TBS1	0.249322	-0.0683075	0.412055	0.656141	yes	no	yes	no
YBR151W::chr2_3	YBR151W	APD1	0.398283	0.457154	0.304841	0.207444	no	no	no	no
YBR157C::chr2_3	YBR157C	ICS2	1.01116	0.217095	0.0448909	0.397739	yes	no	yes	no
YBR158W::chr2_3	YBR158W	AMN1	0.375873	0.150784	0.320192	0.457954	no	no	no	no
YBR161W::chr2_3	YBR161W	CSH1	0.240686	0.239121	0.418571	0.378193	no	no	no	no
YBR162W-A::chr2_3	YBR162W-A	YSY6	0.445506	-0.568234	0.273616	0.940629	no	no	no	no
YBR163W::chr2_3	YBR163W	EXO5	0.00967849	0.196775	0.595411	0.416002	no	no	no	no
YBR165W::chr2_3	YBR165W	UBS1	-0.348895	-0.115995	0.825205	0.695824	no	no	no	no
YBR169C::chr00_16a	YBR169C	SSE2	0.992152	0.405624	0.0484813	0.24323	no	no	no	no
YBR170C::chr2_3	YBR170C	NPL4	0.21866	0.516655	0.435288	0.170254	no	no	no	no
YBR171W::chr2_3	YBR171W	SEC66	1.13515	-0.0164686	0.026404	0.610977	yes	no	yes	no
YBR172C::chr2_3	YBR172C	SMY2	0.634798	0.318955	0.166467	0.310239	no	no	no	no
YBR174C::chr2_4	YBR174C	YBR174C	-0.0277779	0.480129	0.623228	0.192547	no	no	no	no
YBR175W::chr2_4	YBR175W	SWD3	0.234539	0.476354	0.423223	0.194949	no	no	no	no
YBR176W::chr2_4	YBR176W	ECM31	1.55939	0.670983	0.00291261	0.0949833	no	no	no	no
YBR177C::chr2_4	YBR177C	EHT1	1.19629	0.429192	0.0199488	0.226462	no	no	no	no
YBR178W::chr2_4	YBR178W	YBR178W	0.289402	0.000955163	0.382156	0.595417	no	no	no	no
YBR180W::chr2_4	YBR180W	DTR1	0.148764	-0.427038	0.488964	0.891209	no	no	no	no
YBR181C::chr2_4	YBR181C	RPS6B	1.17584	1.26064	0.0219404	0.00371786	no	no	no	no
YBR182C::chr2_4	YBR182C	SMP1	-0.58661	-0.277761	0.918553	0.812507	no	no	no	no
YBR183W::chr2_4	YBR183W	YPC1	1.15202	1.03603	0.0244684	0.0155286	yes	no	yes	no
YBR184W::chr2_4	YBR184W	YBR184W	0.17461	0.167839	0.46904	0.442316	no	no	no	no
YBR185C::chr2_4	YBR185C	MBA1	0.770154	0.33223	0.109319	0.299469	yes	no	yes	no
YBR186W::chr2_4	YBR186W	PCH2	0.72576	0.408131	0.12626	0.241416	yes	no	yes	no
YBR188C::chr2_4	YBR188C	NTC20	0.554403	-0.0933985	0.208211	0.677271	no	no	no	no
YBR189W::chr00_14	YBR189W	RPS9B	0.134892	0.834284	0.499672	0.0456117	no	yes	no	yes
YBR194W::chr2_4	YBR194W	AIM4	0.457087	-0.147742	0.266208	0.721053	no	no	no	no
YBR195C::chr2_4	YBR195C	MSI1	0.0476879	-0.205811	0.566682	0.764389	yes	no	yes	no
YBR197C::chr2_4	YBR197C	YBR197C	1.11808	0.516655	0.0284911	0.170254	yes	no	yes	no
YBR199W::chr2_4	YBR199W	KTR4	0.000173282	-0.0120393	0.602522	0.607037	no	no	no	no
YBR203W::chr2_4	YBR203W	COS111	0.01158	0.585517	0.593985	0.132921	no	no	no	no
YBR204C::chr2_4	YBR204C	LDH1	0.400888	-0.900036	0.303078	0.990063	no	no	no	no
YBR205W::chr2_4	YBR205W	KTR3	0.122708	-0.0504962	0.509077	0.640836	no	no	no	no
YBR206W::chr2_4	YBR206W	YBR206W	-0.295854	-0.151363	0.797505	0.723865	no	no	no	no
YBR207W::chr2_4	YBR207W	FTH1	0.16241	0.125703	0.478438	0.481062	no	no	no	no
YBR210W::chr2_4	YBR210W	ERV15	0.698793	0.967316	0.137403	0.0229039	no	no	no	no
YBR214W::chr2_4	YBR214W	SDS24	0.567548	0.756325	0.200992	0.0657285	no	no	no	no
YBR216C::chr2_4	YBR216C	YBP1	0.583218	0.230376	0.192586	0.385919	no	no	no	no
YBR217W::chr2_4	YBR217W	ATG12	1.71614	0.318274	0.00110374	0.310796	no	no	no	no
YBR218C::chr2_4	YBR218C	PYC2	1.58585	-0.109993	0.00248739	0.690943	no	no	no	no
YBR219C::chr2_4	YBR219C	YBR219C	1.64633	0.364652	0.00171844	0.273909	no	no	no	no
YBR220C::chr2_4	YBR220C	YBR220C	0.02906	0.487841	0.580816	0.187697	no	no	no	no
YBR224W::chr2_4	YBR224W	YBR224W	-0.0250438	0.348407	0.621217	0.286581	no	no	no	no
YBR225W::chr2_4	YBR225W	YBR225W	1.53914	1.07689	0.00328125	0.0121928	no	no	no	no
YBR226C::chr2_4	YBR226C	YBR226C	-0.241501	0.0967517	0.766559	0.507811	no	no	no	no
YBR227C::chr2_4	YBR227C	MCX1	0.168776	0.103236	0.473533	0.501819	no	no	no	no
YBR228W::chr2_4	YBR228W	SLX1	0.118077	0.00208183	0.512651	0.594405	yes	no	yes	no
YBR235W::chr2_4	YBR235W	YBR235W	-0.512712	-0.405342	0.894787	0.881541	no	no	no	no
YBR245C::chr2_4	YBR245C	ISW1	0.280349	-0.268606	0.388855	0.806745	yes	no	yes	no
YBR249C::chr2_4	YBR249C	ARO4	0.908246	0.440706	0.0671459	0.218514	no	no	no	no
YBR250W::chr2_4	YBR250W	SPO23	1.31072	0.268727	0.0114156	0.352412	yes	no	yes	no
YBR251W::chr2_4	YBR251W	MRPS5	0.108921	-0.0172599	0.519714	0.611679	no	no	no	no
YBR259W::chr2_4	YBR259W	YBR259W	0.16274	0.0441672	0.478184	0.556222	no	no	no	no
YBR260C::chr2_4	YBR260C	RGD1	0.891438	0.861303	0.0714791	0.0399238	no	no	no	no
YBR263W::chr2_4	YBR263W	SHM1	0.603635	0.105722	0.181961	0.499521	no	no	no	no
YBR264C::chr2_4	YBR264C	YPT10	0.824323	0.516655	0.0909405	0.170254	no	no	no	no
YBR269C::chr00_1	YBR269C	FMP21	-0.225259	0.359114	0.756826	0.278197	no	no	no	no
YBR271W::chr00_1	YBR271W	EFM2	-0.600119	-0.457161	0.922421	0.903673	no	no	no	no
YBR276C::chr00_16a	YBR276C	PPS1	0.184219	-0.618505	0.46165	0.953183	no	no	no	no
YBR278W::chr00_1	YBR278W	DPB3	0.465884	0.327417	0.260649	0.303355	no	no	no	no
YBR280C::chr00_16a	YBR280C	SAF1	0.787048	0.52301	0.103321	0.166551	no	no	no	no
YBR281C::chr00_1	YBR281C	DUG2	-0.078815	0.0913492	0.6601	0.512802	no	no	no	no
YBR283C::chr00_1	YBR283C	SSH1	0.840148	0.516655	0.0860307	0.170254	no	no	no	no
YBR285W::chr00_1	YBR285W	YBR285W	-0.143206	0.32102	0.704484	0.308553	no	no	no	no
YBR286W::chr00_1	YBR286W	APE3	0.813223	0.375299	0.0945066	0.265756	yes	no	yes	no
YBR287W::chr00_16a	YBR287W	YBR287W	-0.584141	-0.331342	0.917831	0.844063	no	no	no	no
YBR290W::chr00_1	YBR290W	BSD2	-0.573667	0.122024	0.914712	0.484459	no	no	no	no
YBR292C::chr00_1	YBR292C	YBR292C	-0.270619	0.208921	0.783453	0.405061	no	no	no	no
YBR295W::chr00_1	YBR295W	PCA1	-0.574226	0.268727	0.914881	0.352412	no	no	no	no
YBR296C::chr00_1	YBR296C	PHO89	-0.13348	-0.280611	0.697953	0.814279	no	no	no	no
YBR297W::chr00_1	YBR297W	MAL33	0.0207207	0.221199	0.58711	0.394075	no	no	no	no
YBR301W::chr00_16a	YBR301W	PAU24	-0.341849	-0.161417	0.821671	0.731597	no	no	no	no
YCL001W::chr3_1	YCL001W	RER1	-0.116065	-0.255678	0.686098	0.798427	no	no	no	no
YCL002C::chr3_1	YCL002C	YCL002C	0.373392	-0.247857	0.321912	0.793292	no	no	no	no
YCL006C::chr3_1/chr00_12	deleted	YCL006C	-0.10559	0.0943599	0.678873	0.510021	no	no	no	no
YCL008C::chr3_1	YCL008C	STP22	0.480647	0.480647	0.251456	0.192219	yes	yes	yes	yes
YCL009C::chr3_1	YCL009C	ILV6	-0.625558	-0.458892	0.929324	0.904356	no	no	no	no
YCL010C::chr3_1	YCL010C	SGF29	-0.282266	0.519795	0.790007	0.168418	no	no	no	no
YCL011C::chr3_1	YCL011C	GBP2	-0.154366	0.325174	0.711899	0.305173	no	no	no	no
YCL012W::chr3_1	YCL014W	BUD3	-0.624585	-0.0610395	0.929069	0.649925	no	no	no	no
YCL013W::chr3_1	deleted	YCL013W	-0.187678	0.440706	0.733491	0.218514	no	no	no	no
YCL023C::chr3_1/chr00_12	YCL023C	YCL023C	-0.0795592	-0.142308	0.660627	0.716807	no	no	no	no
YCL024W::chr3_1	YCL024W	KCC4	1.1687	0.789673	0.0226737	0.0564111	yes	no	yes	no
YCL025C::chr3_1	YCL025C	AGP1	1.03864	0.879225	0.0400826	0.0364794	no	no	no	no
YCL026C-A::chr00_16a	YCL026C-A	FRM2	-0.562594	0.121517	0.91132	0.484927	no	no	no	no
YCL026C::chr3_1	deleted	YCL026C	-0.88617	-0.875662	0.975872	0.988465	no	no	no	no
YCL027W::chr3_1	YCL027W	FUS1	0.134892	0.040217	0.499672	0.559834	no	no	no	no
YCL028W::chr3_1	YCL028W	RNQ1	0.420077	0.16199	0.290234	0.44767	no	no	no	no
YCL029C::chr3_1	YCL029C	BIK1	0.373392	0.984804	0.321912	0.0207914	no	no	no	no
YCL035C::chr00_11	YCL035C	GRX1	0.447608	-0.227374	0.272264	0.779482	no	no	no	no
YCL037C::chr3_1	YCL037C	SRO9	-0.0503993	0.263889	0.639734	0.356583	no	no	no	no
YCL038C::chr00_12	YCL038C	ATG22	0.532783	0.588805	0.220411	0.131292	no	no	no	no
YCL039W::chr3_1	YCL039W	GID7	-0.38367	-0.413804	0.841992	0.885382	no	no	no	no
YCL047C::chr3_1	YCL047C	POF1	-0.0941112	-0.0683075	0.670877	0.656141	no	no	no	no
YCL049C::chr3_1	YCL049C	YCL049C	-0.268541	0.412819	0.782271	0.238041	no	no	no	no
YCL050C::chr3_1	YCL050C	APA1	-0.348224	-0.229244	0.824871	0.780764	no	no	no	no
YCL056C::chr3_1	YCL056C	PEX34	-0.0645072	0.34673	0.649899	0.287905	no	no	no	no
YCL063W::chr3_1	YCL063W	VAC17	-0.269499	0.062937	0.782816	0.539	no	no	no	no
YCL064C::chr3_1	YCL064C	CHA1	0.232616	0.283678	0.42468	0.339638	no	no	no	no
YCL069W::chr3_1	YCL069W	VBA3	-0.251282	-0.0584597	0.772314	0.647709	no	no	no	no
YCL074W::chr00_12	YCL074W	YCL074W	0.307602	0.125464	0.368796	0.481283	no	no	no	no
YCL076W::chr00_12	YCL076W	YCL076W	-0.329113	-0.145123	0.815169	0.719011	no	no	no	no
YCR003W::chr3_1	YCR003W	MRPL32	-0.962791	-0.713213	0.983139	0.971016	no	no	no	no
YCR004C::chr3_1	YCR004C	YCP4	-0.27146	0.34047	0.78393	0.292872	no	yes	no	yes
YCR005C::chr3_1	YCR005C	CIT2	-0.280449	0.228086	0.788993	0.38795	no	no	no	no
YCR010C::chr3_1	YCR010C	ADY2	-0.0119103	0.434193	0.611513	0.222991	no	no	no	no
YCR014C::chr3_1	YCR014C	POL4	0.126214	0.00764135	0.506371	0.589404	no	no	no	no
YCR015C::chr3_1	YCR015C	YCR015C	0.0054539	0.384743	0.598576	0.258629	no	no	no	no
YCR017C::chr3_1	YCR017C	CWH43	-1.01827	0.214626	0.987151	0.399946	no	no	no	no
YCR019W::chr3_1	YCR019W	MAK32	-0.167352	-0.122079	0.720413	0.700737	no	no	no	no
YCR020C-A::chr3_1	YCR020C-A	MAK31	-0.726971	-0.932956	0.952245	0.991914	no	no	no	no
YCR020C::chr3_1	YCR020C	PET18	-0.0917541	0.141146	0.669225	0.466821	no	no	no	no
YCR021C::chr3_1	YCR021C	HSP30	0.0495493	-2.17819	0.565264	1	no	no	no	no
YCR024C-A::chr00_1	YCR024C-A	PMP1	0.310227	-0.241144	0.366881	0.788824	no	no	no	no
YCR024C::chr00_1	YCR024C	SLM5	0.483455	-0.130294	0.249727	0.707313	no	no	no	no
YCR025C::chr00_1	YCR025C	YCR025C	0.118077	0.0760824	0.512651	0.526893	yes	no	yes	no
YCR027C::chr00_1	YCR027C	RHB1	-0.453211	-0.467225	0.872284	0.907594	no	no	no	no
YCR030C::chr00_16a	YCR030C	SYP1	-0.380935	-0.163465	0.840712	0.733159	no	no	no	no
YCR031C::chr00_1	YCR031C	RPS14A	1.73832	1.14115	0.000955514	0.00820086	no	no	yes	no
YCR033W::chr00_16a	YCR033W	SNT1	0.369956	0.522437	0.324299	0.166882	no	no	no	no
YCR036W::chr00_1	YCR036W	RBK1	0.656497	-0.0444608	0.156196	0.635596	yes	no	yes	no
YCR037C::chr00_1	YCR037C	PHO87	1.50712	0.221199	0.00395006	0.394075	yes	no	yes	no
YCR043C::chr00_1	YCR043C	YCR043C	-0.20197	-0.0087187	0.742496	0.604076	no	no	no	no
YCR045C::chr00_1	YCR045C	RRT12	-0.337733	0.262898	0.819585	0.357439	no	no	no	no
YCR046C::chr00_16a	YCR046C	IMG1	-0.193239	0.465557	0.737014	0.201918	no	no	no	no
YCR048W::chr00_16a	YCR048W	ARE1	1.42008	0.402998	0.0064256	0.245139	no	no	no	no
YCR049C::chr00_1	YCR049C	YCR049C	1.15822	0.516655	0.0237878	0.170254	no	no	no	no
YCR051W::chr00_1	YCR051W	YCR051W	1.15197	0.732788	0.024475	0.0729932	no	no	no	no
YCR060W::chr00_16a	YCR060W	TAH1	1.54517	1.31996	0.00316727	0.00244572	no	no	no	no
YCR061W::chr00_1	YCR061W	YCR061W	-0.833221	0.819218	0.969441	0.049056	no	no	no	no
YCR065W::chr00_1	YCR065W	HCM1	0.859784	0.576109	0.0802177	0.13766	no	no	no	no
YCR066W::chr00_1	YCR066W	RAD18	-0.171191	0.461425	0.722907	0.204624	no	no	no	no
YCR067C::chr00_16a	YCR067C	SED4	-0.00842569	-0.0974538	0.608926	0.680635	no	no	no	no
YCR068W::chr00_1	YCR068W	ATG15	0.283755	-0.0397383	0.38633	0.631478	no	no	no	no
YCR069W::chr00_16a	YCR069W	CPR4	-0.250834	0.120302	0.772052	0.486049	no	no	no	no
YCR075C::chr00_16a	YCR075C	ERS1	-0.11288	0.149049	0.683909	0.459548	no	no	no	no
YCR076C::chr00_1	YCR076C	FUB1	-0.224586	0.356714	0.756418	0.280066	no	no	no	no
YCR082W::chr00_1	YCR082W	AHC2	0.0407121	0.529952	0.571985	0.162566	no	no	no	no
YCR083W::chr00_16a	YCR083W	TRX3	-0.861746	-0.358757	0.973062	0.85877	no	no	no	no
YCR085W::chr00_1	YCR085W	YCR085W	-0.188145	-0.251862	0.733787	0.795931	no	no	no	no
YCR086W::chr00_1	YCR086W	CSM1	0.76072	1.36708	0.112775	0.00173202	no	no	no	no
YCR090C::chr00_2	YCR090C	YCR090C	-0.387919	-0.281552	0.843969	0.814861	no	no	no	no
YCR091W::chr00_2	YCR091W	KIN82	0.548652	0.0785339	0.211416	0.524632	no	no	no	no
YCR092C::chr00_2	YCR092C	MSH3	-0.238472	0.501388	0.76476	0.179363	no	no	no	no
YCR094W::chr00_2	YCR094W	CDC50	0.360376	0.73078	0.330993	0.0736406	no	no	no	no
YCR095C::chr00_14	YCR095C	OCA4	0.556052	0.990586	0.207297	0.0201302	no	no	no	no
YCR098C::chr00_2	YCR098C	GIT1	0.0481268	0.383388	0.566347	0.259645	no	no	no	no
YCR099C::chr00_2	YCR099C	YCR099C	0.201293	0.0191553	0.448553	0.579001	no	no	no	no
YCR101C::chr00_2	YCR101C	YCR101C	-0.241086	-0.208485	0.766313	0.766292	no	no	no	no
YCR102C::chr00_2	YCR102C	YCR102C	0.512781	-0.000562893	0.232054	0.596779	no	no	no	no
YCR102W-A::chr00_14	YCR102W-A	YCR102W-A	0.420328	0.207817	0.290067	0.406052	no	no	no	no
YCR105W::chr00_2	YCR105W	ADH7	0.23612	0.157488	0.422025	0.451798	no	no	no	no
YCR106W::chr00_2	YCR106W	RDS1	-0.0309415	-0.0683075	0.625551	0.656141	no	no	no	no
YDL006W::chr4_1	YDL006W	PTC1	-0.19186	0.357299	0.736142	0.27961	no	no	no	no
YDL011C::chr4_1	YDL011C	YDL011C	-0.346531	0.678926	0.824024	0.0919109	no	no	no	no
YDL012C::chr4_1	YDL012C	YDL012C	-0.0368668	-0.399346	0.629889	0.878765	no	no	no	no
YDL018C::chr4_1	YDL018C	ERP3	-0.40656	-0.0239134	0.852445	0.617573	no	no	no	no
YDL021W::chr4_1	YDL021W	GPM2	-0.654844	-0.0882071	0.936675	0.672943	no	no	no	no
YDL025C::chr4_1	YDL025C	RTK1	0.231667	0.2118	0.4254	0.402477	no	no	no	no
YDL026W::chr4_1	YDL026W	YDL026W	-0.314504	0.260315	0.807531	0.359674	no	no	no	no
YDL039C::chr4_1	YDL039C	PRM7	-0.00676008	0.188526	0.607688	0.423471	no	no	no	no
YDL040C::chr4_1	YDL040C	NAT1	-0.0887748	0.688786	0.667133	0.0882004	no	no	no	no
YDL044C::chr4_1	YDL044C	MTF2	-0.322677	0.455254	0.811827	0.208705	no	no	no	no
YDL046W::chr4_1	YDL046W	NPC2	0.405061	0.341568	0.300263	0.291997	no	no	no	no
YDL048C::chr4_1	YDL048C	STP4	-0.345965	-0.648041	0.823741	0.959504	no	no	no	no
YDL050C::chr4_1	YDL050C	YDL050C	0.447984	0.535034	0.272022	0.159689	no	no	no	no
YDL051W::chr4_1	YDL051W	LHP1	-0.394867	-0.0326836	0.847165	0.625299	no	no	no	no
YDL052C::chr4_1	YDL052C	SLC1	-0.652373	-0.587417	0.936079	0.9457	no	no	no	no
YDL057W::chr4_1	YDL057W	YDL057W	0.0947212	-0.00941381	0.530654	0.604696	no	no	no	no
YDL062W::chr4_1	YDL062W	YDL062W	-0.138269	0.595825	0.701177	0.127859	no	no	no	no
YDL071C::chr4_1	YDL071C	YDL071C	-0.432452	0.699519	0.863697	0.0842895	no	no	no	no
YDL074C::chr4_1	YDL074C	BRE1	-0.0128619	0.258857	0.612219	0.360938	no	no	no	no
YDL077C::chr4_1	YDL077C	VAM6	0.189118	0.608403	0.457887	0.121867	no	yes	no	yes
YDL078C::chr4_1	YDL078C	MDH3	-0.5921	-0.188236	0.920142	0.751678	no	no	no	no
YDL081C::chr4_1	YDL081C	RPP1A	0.033876	1.13027	0.577171	0.00878242	no	no	no	no
YDL085W::chr4_1	YDL085W	NDE2	-0.604988	0.0737115	0.92378	0.529079	no	no	no	no
YDL094C::chr4_1	YDL094C	YDL094C	0.072251	-0.0683075	0.547916	0.656141	no	no	no	no
YDL095W::chr4_1	YDL095W	PMT1	-0.741945	-0.435411	0.955057	0.894785	no	no	no	no
YDL096C::chr4_2	YDL096C	OPI6	-0.524713	-0.4716	0.898956	0.909261	no	no	no	no
YDL099W::chr4_2	YDL099W	BUG1	0.280349	-0.0986811	0.388855	0.68165	yes	no	yes	no
YDL101C::chr4_2	YDL101C	DUN1	0.942718	0.565565	0.0588971	0.143106	no	no	no	no
YDL104C::chr4_2	YDL104C	QRI7	-0.939412	-0.754492	0.981151	0.97679	no	no	no	no
YDL112W::chr4_2	YDL112W	TRM3	-0.277748	-0.1802	0.787479	0.745747	no	no	no	no
YDL118W::chr4_2	YDL118W	YDL118W	-0.688175	-0.891595	0.944302	0.989533	no	no	no	no
YDL122W::chr4_2	YDL122W	UBP1	0.0294379	1.1008	0.58053	0.0105446	no	yes	no	yes
YDL123W::chr4_2	YDL123W	SNA4	-0.632722	-0.115613	0.93118	0.695514	no	no	no	no
YDL124W::chr4_2	YDL124W	YDL124W	-0.375208	-0.0933985	0.838008	0.677271	no	no	no	no
YDL127W::chr4_2	YDL127W	PCL2	-0.0174145	0.34673	0.615589	0.287905	no	no	no	no
YDL129W::chr4_2	YDL129W	YDL129W	-0.330354	-0.208485	0.815808	0.766292	no	no	no	no
YDL133C-A::chr00_14	YDL133C-A	RPL41B	0.0116755	0.0351221	0.593913	0.564485	no	no	no	no
YDL133W::chr4_2	YDL133W	SRF1	-0.605214	-0.428897	0.923843	0.892011	no	no	no	no
YDL135C::chr4_2	YDL135C	RDI1	-0.364401	-0.269005	0.832826	0.806998	no	no	no	no
YDL136W::chr4_2	YDL136W	RPL35B	-0.525525	-0.371235	0.899233	0.865141	no	no	no	no
YDL137W::chr4_2	YDL137W	ARF2	-0.038173	0.0355283	0.630843	0.564115	no	no	no	no
YDL142C::chr4_2	YDL142C	CRD1	-0.524713	-0.0760848	0.898956	0.662747	no	no	no	no
YDL144C::chr4_2	YDL144C	YDL144C	-0.31073	0.125703	0.805527	0.481062	no	no	no	no
YDL154W::chr4_2	YDL154W	MSH5	-0.191154	-0.115275	0.735695	0.69524	no	no	no	no
YDL155W::chr4_2	YDL155W	CLB3	0.073832	-0.737662	0.546704	0.974565	no	no	no	no
YDL156W::chr4_2	YDL156W	CMR1	-0.439443	0.306984	0.866632	0.320092	no	no	no	no
YDL161W::chr4_2	YDL161W	ENT1	-0.906429	-0.402425	0.978011	0.880196	no	no	no	no
YDL168W::chr4_2	YDL168W	SFA1	-0.649936	-0.35371	0.935486	0.856135	no	no	no	no
YDL170W::chr4_2	YDL170W	UGA3	-0.708383	-0.694493	0.948561	0.968028	no	no	no	no
YDL171C::chr4_2	YDL171C	GLT1	0.0123572	-0.0615816	0.593401	0.65039	no	no	no	no
YDL172C::chr4_2	YDL172C	YDL172C	-0.960171	-0.334953	0.982925	0.846056	no	no	no	no
YDL173W::chr4_2	YDL173W	PAR32	-0.289526	-0.222636	0.794033	0.776214	no	no	no	no
YDL174C::chr4_2	YDL174C	DLD1	-0.553595	-0.440276	0.90849	0.896823	no	no	no	no
YDL176W::chr4_2	YDL176W	YDL176W	-0.533868	0.0165814	0.902053	0.581332	no	no	no	no
YDL177C::chr4_2	YDL177C	YDL177C	-0.106262	0.0489586	0.679339	0.551834	no	no	no	no
YDL178W::chr4_2	YDL178W	DLD2	-0.497128	-0.416231	0.889192	0.886467	no	no	no	no
YDL180W::chr4_2	YDL180W	YDL180W	-0.776545	0.041317	0.961046	0.558829	no	no	no	no
YDL182W::chr4_2	YDL182W	LYS20	-0.134746	-0.0020738	0.698807	0.598133	no	no	no	no
YDL183C::chr4_2	YDL183C	YDL183C	-0.0882137	-1.22877	0.666738	0.999	no	no	no	no
YDL188C::chr4_2	YDL188C	PPH22	-0.158763	0.516655	0.714795	0.170254	no	no	no	no
YDL192W::chr4_3	YDL192W	ARF1	0.369616	-0.672379	0.324536	0.964175	yes	no	yes	no
YDL198C::chr4_3	YDL198C	GGC1	-0.674425	0.041076	0.941248	0.559049	no	no	no	no
YDL199C::chr4_3	YDL199C	YDL199C	0.207806	-0.858854	0.44357	0.987236	no	no	no	no
YDL201W::chr4_3	YDL201W	TRM8	-0.0947566	0.186506	0.671329	0.425303	no	no	no	no
YDL202W::chr4_3	YDL202W	MRPL11	-0.856241	-0.321727	0.972393	0.838674	no	no	no	no
YDL204W::chr4_3	YDL204W	RTN2	0.0207207	-0.0851813	0.58711	0.67041	no	no	no	no
YDL211C::chr4_3	YDL211C	YDL211C	-0.669852	-0.64717	0.940204	0.959328	no	no	no	no
YDL215C::chr4_3	YDL215C	GDH2	-0.25188	-0.195858	0.772663	0.757235	no	no	no	no
YDL218W::chr4_3	YDL218W	YDL218W	-0.169963	0.834284	0.72211	0.0456117	no	yes	no	yes
YDL219W::chr4_3	YDL219W	DTD1	-0.0744366	0.0126125	0.65699	0.58492	no	no	no	no
YDL222C::chr4_3	YDL222C	FMP45	0.139825	-0.131317	0.495863	0.708127	no	no	no	no
YDL223C::chr4_3	YDL223C	HBT1	0.175231	0.0248019	0.468562	0.573879	no	no	no	no
YDL224C::chr4_3	YDL224C	WHI4	-0.110686	0.0721737	0.682396	0.530496	no	no	no	no
YDL229W::chr4_3	YDL229W	SSB1	-0.181909	-0.260953	0.72981	0.801846	no	no	no	no
YDL230W::chr4_3	YDL230W	PTP1	0.32781	0.777522	0.354146	0.0596778	no	no	no	no
YDL231C::chr4_3	YDL231C	BRE4	0.0229908	0.178486	0.585399	0.432597	no	no	no	no
YDL233W::chr4_3	YDL233W	YDL233W	0.045243	0.0498739	0.568542	0.550995	no	no	no	no
YDL236W::chr4_3	YDL236W	PHO13	-0.291809	0.950552	0.79529	0.0250961	no	no	no	no
YDL239C::chr4_3	YDL239C	ADY3	1.62058	0.302948	0.00201458	0.323443	yes	no	yes	no
YDL240W::chr4_3	YDL240W	LRG1	0.228163	0.0836956	0.42806	0.519869	no	no	no	no
YDR001C::chr4_3	YDR001C	NTH1	-0.312369	-0.253499	0.806399	0.797004	no	no	no	no
YDR004W::chr4_3	YDR004W	RAD57	0.411763	0.996648	0.295768	0.0194563	no	no	no	no
YDR005C::chr4_3	YDR005C	MAF1	-0.539994	-0.378648	0.904087	0.868832	no	no	no	no
YDR006C::chr4_3	YDR006C	SOK1	0.166941	0.219269	0.474946	0.395797	no	no	no	no
YDR007W::chr00_16b	YDR007W	TRP1	-0.738613	-0.2907	0.954443	0.820467	no	no	no	no
YDR018C::chr4_3	YDR018C	YDR018C	-0.797633	-0.0683075	0.964366	0.656141	no	no	no	no
YDR022C::chr4_3	YDR022C	CIS1	-0.400743	-0.224427	0.849834	0.777453	no	no	no	no
YDR025W::chr4_3	YDR025W	RPS11A	-0.269729	0.624369	0.782948	0.114548	no	no	no	no
YDR026C::chr4_3	YDR026C	NSI1	-0.268786	0.201153	0.782411	0.41205	no	no	no	no
YDR028C::chr4_3	YDR028C	REG1	-0.0096553	-0.446529	0.609839	0.8994	no	no	no	no
YDR033W::chr4_3	YDR033W	MRH1	-0.00575155	0.212649	0.606938	0.401717	no	no	no	no
YDR035W::chr4_3	YDR035W	ARO3	-0.196238	-0.0933985	0.738904	0.677271	no	no	no	no
YDR036C::chr4_3	YDR036C	EHD3	-0.744814	-0.672379	0.955581	0.964175	no	no	no	no
YDR043C::chr4_3	YDR043C	NRG1	-0.311308	-0.454337	0.805835	0.902551	no	no	no	no
YDR046C::chr4_3	YDR046C	BAP3	-0.0281889	0.851074	0.62353	0.0420054	no	no	no	no
YDR048C::chr00_16b	YDR048C	YDR048C	-0.539367	0.011162	0.90388	0.58623	no	yes	no	yes
YDR055W::chr4_4	YDR055W	PST1	-0.528618	-0.170187	0.900285	0.738253	no	no	no	no
YDR056C::chr4_4	YDR056C	YDR056C	-0.227207	0.0209598	0.758005	0.577366	no	no	no	no
YDR057W::chr4_4	YDR057W	YOS9	-0.234093	0.0218903	0.762147	0.576522	no	no	no	no
YDR058C::chr00_14	YDR058C	TGL2	0.801154	0.662085	0.0984993	0.0985139	no	no	no	no
YDR059C::chr4_4	YDR059C	UBC5	0.168871	-0.15077	0.473459	0.723405	no	no	no	no
YDR066C::chr4_4	YDR066C	RTR2	-0.301207	-0.0610395	0.800414	0.649925	no	no	no	no
YDR068W::chr4_4	YDR068W	DOS2	-0.0644467	0.105522	0.649856	0.499706	no	no	no	no
YDR070C::chr4_4	YDR070C	FMP16	0.161136	0.426457	0.47942	0.228374	no	no	no	no
YDR072C::chr4_4	YDR072C	IPT1	-0.983567	-0.503809	0.984752	0.920853	no	no	no	no
YDR073W::chr4_4	YDR073W	SNF11	0.120662	0.0874872	0.510656	0.516369	no	no	no	no
YDR074W::chr00_11	YDR074W	TPS2	0.397623	0.856404	0.305288	0.04091	no	no	no	no
YDR075W::chr4_4	YDR075W	PPH3	-0.453232	-0.548955	0.872292	0.935167	no	no	no	no
YDR076W::chr4_4	YDR076W	RAD55	-0.108562	0.720188	0.68093	0.0771268	no	no	no	no
YDR077W::chr4_4	YDR077W	SED1	-0.233036	0.235242	0.761513	0.381614	no	no	no	no
YDR078C::chr4_4	YDR078C	SHU2	-0.782547	-0.164984	0.962016	0.734314	no	no	no	no
YDR080W::chr4_4	YDR080W	VPS41	-0.471132	0.533115	0.879388	0.160771	no	yes	no	yes
YDR083W::chr4_4	YDR083W	RRP8	1.0046	1.20149	0.0461051	0.00554815	no	yes	no	yes
YDR089W::chr4_4	YDR089W	YDR089W	-0.160345	-0.285899	0.715834	0.817539	no	no	no	no
YDR090C::chr4_4	YDR090C	YDR090C	0.227978	0.0244029	0.4282	0.574241	no	no	no	no
YDR094W::chr4_4	YDR094W	YDR094W	-0.239051	0.0972786	0.765104	0.507324	no	no	no	no
YDR095C::chr4_4	YDR095C	YDR095C	0.104049	0.0652757	0.52347	0.536849	no	no	no	no
YDR097C::chr4_4	YDR097C	MSH6	-0.504741	-0.0595373	0.891951	0.648635	no	no	no	no
YDR098C::chr4_4	YDR098C	GRX3	-0.359155	0.277467	0.830272	0.344923	no	no	no	no
YDR099W::chr4_4	YDR099W	BMH2	0.0887391	0.931693	0.535257	0.0277696	no	no	no	no
YDR107C::chr4_4	YDR107C	TMN2	0.594262	-0.291891	0.186792	0.821189	no	no	no	no
YDR108W::chr4_4	YDR108W	TRS85	-0.688231	-0.0199445	0.944314	0.61406	no	no	no	no
YDR109C::chr4_4	YDR109C	YDR109C	0.45368	0.611292	0.268377	0.120519	no	no	no	no
YDR110W::chr4_4	YDR110W	FOB1	-0.0339236	-0.0252388	0.627736	0.618743	no	no	no	no
YDR111C::chr4_4	YDR111C	ALT2	0.151965	-0.3521	0.486494	0.855288	no	no	no	no
YDR112W::chr4_4	YDR112W	IRC2	-0.3841	-0.0527106	0.842193	0.642751	no	no	no	no
YDR114C::chr4_4	YDR114C	YDR114C	-0.256019	0.445358	0.775072	0.215349	no	no	no	no
YDR115W::chr4_4	YDR115W	YDR115W	-0.471579	-0.0316786	0.879562	0.624416	no	no	no	no
YDR116C::chr4_4	YDR116C	MRPL1	-0.584661	-0.774576	0.917983	0.979229	no	no	no	no
YDR119W::chr4_4	YDR119W	VBA4	-0.178059	0.069196	0.727341	0.533239	no	no	no	no
YDR120C::chr4_4	YDR120C	TRM1	-0.156818	0.62357	0.713515	0.114906	no	no	no	no
YDR121W::chr4_4	YDR121W	DPB4	-0.259252	0.331495	0.776944	0.300061	no	no	no	no
YDR122W::chr4_4	YDR122W	KIN1	0.497159	0.931693	0.241381	0.0277696	no	no	no	no
YDR128W::chr4_4	YDR128W	MTC5	0.202788	1.08	0.447408	0.0119666	no	no	no	no
YDR131C::chr4_4	YDR131C	YDR131C	0.11383	0.495593	0.515928	0.182899	no	no	no	no
YDR134C::chr4_4	YDR134C	YDR134C	-0.00443282	0.301531	0.605956	0.324624	no	no	no	no
YDR137W::chr4_4	YDR137W	RGP1	0.234845	0.287173	0.422991	0.336678	no	no	no	no
YDR139C::chr4_4	YDR139C	RUB1	-0.224857	0.283678	0.756582	0.339638	no	no	no	no
YDR140W::chr4_4	YDR140W	MTQ2	0.204683	0.875507	0.445958	0.0371732	no	yes	no	yes
YDR142C::chr4_4	YDR142C	PEX7	-0.446258	-0.011724	0.869451	0.606756	no	no	no	no
YDR143C::chr4_4	YDR143C	SAN1	0.118077	-1.45735	0.512651	0.999853	yes	no	yes	no
YDR146C::chr4_4	YDR146C	SWI5	-0.0906404	-0.0138597	0.668444	0.608657	no	no	no	no
YDR147W::chr4_5	YDR147W	EKI1	-0.21335	0.0882628	0.749553	0.515653	no	no	no	no
YDR148C::chr4_5	YDR148C	KGD2	-0.813106	-0.171401	0.966652	0.739167	no	no	no	no
YDR149C::chr4_5	YDR149C	YDR149C	-0.499753	-0.0202132	0.890149	0.614298	no	no	no	no
YDR150W::chr4_5	YDR150W	NUM1	-0.422514	0.0231155	0.85945	0.57541	no	no	no	no
YDR151C::chr4_5	YDR151C	CTH1	-0.320926	0.510052	0.810911	0.174156	no	no	no	no
YDR152W::chr4_5	YDR152W	GIR2	-0.0916391	0.34673	0.669145	0.287905	no	no	no	no
YDR153C::chr4_5	YDR153C	ENT5	-0.0614804	0.205103	0.647727	0.408493	no	no	no	no
YDR154C::chr4_5	YDR154C	YDR154C	-0.253902	-0.6687	0.773841	0.963499	no	no	no	no
YDR156W::chr4_5	YDR156W	RPA14	-0.195964	0.201995	0.738731	0.411291	no	no	no	no
YDR157W::chr4_5	YDR157W	YDR157W	-0.532027	-0.169359	0.901436	0.737628	no	no	no	no
YDR159W::chr4_5	YDR159W	SAC3	-0.0802371	0.474591	0.661108	0.196077	no	no	no	no
YDR161W::chr4_5	YDR161W	YDR161W	0.608403	0.608403	0.179534	0.121867	yes	yes	yes	yes
YDR162C::chr4_5	YDR162C	NBP2	-0.859086	-0.719821	0.97274	0.972013	no	no	no	no
YDR163W::chr4_5	YDR163W	CWC15	-0.18573	-0.426761	0.732251	0.89109	no	no	no	no
YDR169C::chr4_5	YDR169C	STB3	-0.237077	0.455254	0.763929	0.208705	no	no	no	no
YDR171W::chr4_5	YDR171W	HSP42	-0.366796	0.322333	0.833983	0.307482	no	no	no	no
YDR174W::chr00_14	YDR174W	HMO1	0.11383	1.48065	0.515928	0.000720433	no	yes	no	yes
YDR178W::chr4_5	YDR178W	SDH4	-0.546618	-0.187455	0.90625	0.751105	no	no	no	no
YDR181C::chr4_5	YDR181C	SAS4	-0.249982	0.319038	0.771553	0.310171	no	no	no	no
YDR183W::chr4_5	YDR183W	PLP1	-0.492634	-0.318286	0.887539	0.836716	no	no	no	no
YDR184C::chr4_5	YDR184C	ATC1	0.0828711	0.844342	0.539767	0.0434225	no	no	no	no
YDR185C::chr4_5	YDR185C	UPS3	-0.32066	-0.240407	0.810772	0.788329	no	no	no	no
YDR186C::chr4_5	YDR186C	YDR186C	-0.202523	0.311397	0.742842	0.316445	no	no	no	no
YDR191W::chr4_5	YDR191W	HST4	-0.254723	-0.253014	0.774319	0.796686	no	no	no	no
YDR192C::chr4_5	YDR192C	NUP42	-0.00697841	0.445164	0.60785	0.215481	no	no	no	no
YDR193W::chr4_5	YDR193W	YDR193W	-0.27146	-0.291541	0.78393	0.820977	no	no	no	no
YDR195W::chr4_5	YDR195W	REF2	0.930523	2.00188	0.0617193	5.56858e-06	no	yes	no	yes
YDR197W::chr4_5	YDR197W	CBS2	-0.448549	-0.0837375	0.870389	0.669198	no	no	no	no
YDR198C::chr4_5	YDR198C	RKM2	0.10206	0.431922	0.525002	0.224563	no	no	no	no
YDR202C::chr00_14	YDR202C	RAV2	0.132779	0.656728	0.501303	0.100686	no	no	no	no
YDR203W::chr4_5	YDR203W	YDR203W	-0.207231	0.00729012	0.745772	0.58972	no	no	no	no
YDR204W::chr4_5	YDR204W	COQ4	-0.579319	0.259025	0.916406	0.360793	no	no	no	no
YDR205W::chr00_14	YDR205W	MSC2	-0.121168	-0.0255469	0.689593	0.619015	no	no	no	no
YDR206W::chr4_5	YDR206W	EBS1	-0.664389	-0.282812	0.938938	0.81564	no	no	no	no
YDR207C::chr4_5	YDR207C	UME6	0.376864	0.895685	0.319507	0.0335339	no	yes	no	yes
YDR209C::chr4_5	YDR209C	YDR209C	-0.412998	-0.141624	0.855299	0.716271	no	no	no	no
YDR210W::chr4_5	YDR210W	YDR210W	-0.127463	-0.0848587	0.693879	0.670139	no	no	no	no
YDR213W::chr4_5	YDR213W	UPC2	0.046232	0.587577	0.56779	0.131899	no	no	no	no
YDR214W::chr4_5	YDR214W	AHA1	0.0698152	0.288909	0.549783	0.335211	no	no	no	no
YDR215C::chr4_5	YDR215C	YDR215C	0.0724357	0.213543	0.547775	0.400916	no	no	no	no
YDR216W::chr4_5	YDR216W	ADR1	-0.477458	-0.314947	0.881828	0.834802	no	no	no	no
YDR217C::chr4_5	YDR217C	RAD9	0.14715	-0.107302	0.490209	0.688742	no	no	no	no
YDR218C::chr4_5	YDR218C	SPR28	-0.142735	0.173581	0.70417	0.43707	no	no	no	no
YDR219C::chr4_5	YDR219C	MFB1	-0.69025	-0.630186	0.944751	0.955772	no	no	no	no
YDR220C::chr4_5	YDR220C	YDR220C	-0.225919	0.617938	0.757226	0.117457	no	no	no	no
YDR221W::chr4_5	YDR221W	GTB1	-0.816536	-0.529798	0.967141	0.92936	no	no	no	no
YDR222W::chr4_5	YDR222W	YDR222W	-0.357977	-0.22801	0.829695	0.779919	no	no	no	no
YDR223W::chr4_5	YDR223W	CRF1	0.41099	0.583769	0.296284	0.133793	no	no	no	no
YDR225W::chr4_5	YDR225W	HTA1	0.717408	0.544669	0.129641	0.154325	no	no	no	no
YDR229W::chr4_5	YDR229W	IVY1	0.935553	0.605093	0.0605427	0.123424	no	no	no	no
YDR230W::chr4_5	YDR230W	YDR230W	0.511707	0.146705	0.232688	0.461704	no	no	no	no
YDR234W::chr4_5	YDR234W	LYS4	0.498806	-0.0556337	0.240388	0.645275	no	no	no	no
YDR239C::chr4_5	YDR239C	YDR239C	0.292472	0.306732	0.379891	0.320301	no	no	no	no
YDR242W::chr00_17a	YDR242W	AMD2	0.583741	-0.210327	0.192309	0.767596	yes	no	yes	no
YDR244W::chr4_6	YDR244W	PEX5	1.22931	0.462207	0.0170581	0.20411	no	no	no	no
YDR248C::chr4_6	YDR248C	YDR248C	0.45368	0.411685	0.268377	0.238855	yes	no	yes	no
YDR251W::chr4_6	YDR251W	PAM1	0.34047	-0.154037	0.345076	0.725932	yes	no	yes	no
YDR253C::chr4_6	YDR253C	MET32	0.249322	-0.00417716	0.412055	0.600017	yes	no	yes	no
YDR254W::chr4_6	YDR254W	CHL4	2.31261	1.3045	1.24852e-05	0.00273237	no	no	yes	no
YDR256C::chr4_6	YDR256C	CTA1	0.935213	0.18695	0.0606217	0.424901	yes	no	yes	no
YDR259C::chr4_6	YDR259C	YAP6	0.121026	0.115139	0.510376	0.490819	no	no	no	no
YDR261C::chr4_6	YDR261C	EXG2	0.45368	-0.510312	0.268377	0.923051	yes	no	yes	no
YDR273W::chr4_6	YDR273W	DON1	0.992546	0.674917	0.0484044	0.0934524	yes	no	yes	no
YDR281C::chr4_6	YDR281C	PHM6	0.778593	0.340275	0.106292	0.293027	no	no	no	no
YDR283C::chr4_6	YDR283C	GCN2	0.398185	-0.203237	0.304907	0.762551	yes	no	yes	no
YDR287W::chr4_6	YDR287W	INM2	0.51822	0.336083	0.228854	0.296376	no	no	no	no
YDR291W::chr4_6	YDR291W	HRQ1	1.12456	0.0141547	0.0276834	0.583527	no	no	no	no
YDR293C::chr4_6	YDR293C	SSD1	1.44001	-0.523987	0.00576138	0.927521	yes	no	yes	no
YDR294C::chr4_6	YDR294C	DPL1	0.92866	0.214999	0.0621596	0.399612	no	no	no	no
YDR295C::chr4_6	YDR295C	HDA2	0.0476879	-0.553734	0.566682	0.936556	yes	no	yes	no
YDR296W::chr4_6	YDR296W	MHR1	1.88549	0.0995342	0.000351348	0.50524	no	no	yes	no
YDR297W::chr4_6	YDR297W	SUR2	0.854912	-0.220311	0.0816317	0.7746	no	no	no	no
YDR300C::chr4_6	YDR300C	PRO1	0.966273	0.239815	0.0537337	0.377582	no	no	no	no
YDR304C::chr4_6	YDR304C	CPR5	0.571681	0.424733	0.198754	0.229584	no	no	no	no
YDR306C::chr4_6	YDR306C	YDR306C	1.44773	0.680631	0.00552076	0.0912614	no	no	no	no
YDR309C::chr4_6	YDR309C	GIC2	0.0476879	-0.205811	0.566682	0.764389	yes	no	yes	no
YDR310C::chr4_6	YDR310C	SUM1	0.803853	0.663841	0.0975959	0.0978098	no	no	no	no
YDR312W::chr4_6	YDR312W	SSF2	0.973687	0.47918	0.0521847	0.193149	yes	no	yes	no
YDR314C::chr4_6	YDR314C	RAD34	1.19065	0.125865	0.0204827	0.480913	no	no	no	no
YDR317W::chr4_6	YDR317W	HIM1	0.40733	-0.702658	0.298738	0.969361	no	no	no	no
YDR319C::chr4_6	YDR319C	YDR319C	1.27033	0.406373	0.0139713	0.242687	no	no	no	no
YDR321W::chr4_6	YDR321W	ASP1	0.520794	0.391124	0.227349	0.25387	no	no	no	no
YDR322W::chr4_6	YDR322W	MRPL35	0.480647	0.163018	0.251456	0.446728	yes	no	yes	no
YDR326C::chr00_17a	YDR326C	YSP2	-0.0134051	0.238354	0.612621	0.378869	no	no	no	no
YDR329C::chr4_6	YDR329C	PEX3	0.369616	0.183231	0.324536	0.428279	yes	no	yes	no
YDR340W::chr4_7	YDR340W	YDR340W	0.830704	0.12634	0.0889364	0.480474	no	no	no	no
YDR344C::chr4_7	YDR344C	YDR344C	1.1484	0.447392	0.0248734	0.213973	no	no	no	no
YDR346C::chr4_7	YDR346C	SVF1	-0.581556	-0.548955	0.917069	0.935167	no	no	no	no
YDR347W::chr4_7	YDR347W	MRP1	0.518056	0.375857	0.22895	0.265332	no	no	no	no
YDR349C::chr4_7	YDR349C	YPS7	0.605107	-0.0636909	0.181209	0.652197	no	no	no	no
YDR360W::chr4_7	YDR360W	OPI7	0.621625	0.795631	0.172909	0.0548619	no	no	no	no
YDR370C::chr4_7	YDR370C	YDR370C	0.770154	0.33223	0.109319	0.299469	yes	no	yes	no
YDR371W::chr4_7	YDR371W	CTS2	1.42688	0.357456	0.00619159	0.279487	no	no	no	no
YDR372C::chr4_7	YDR372C	VPS74	1.02277	0.887422	0.0428068	0.034987	no	no	no	no
YDR378C::chr4_7	YDR378C	LSM6	1.00504	0.746953	0.0460232	0.0685513	no	no	no	no
YDR380W::chr4_7	YDR380W	ARO10	0.144418	0.114284	0.492318	0.491609	no	no	no	no
YDR384C::chr4_7	YDR384C	ATO3	0.0563446	0.18072	0.560083	0.430563	no	no	no	no
YDR385W::chr4_7	YDR385W	EFT2	1.64462	0.992575	0.00173672	0.019907	yes	no	yes	no
YDR386W::chr4_7	YDR386W	MUS81	-0.078815	0.49112	0.6601	0.185659	no	no	no	no
YDR391C::chr4_7	YDR391C	YDR391C	0.643083	-0.167086	0.162495	0.735909	no	no	no	no
YDR393W::chr4_7	YDR393W	SHE9	1.11157	0.600313	0.0293213	0.125698	no	no	no	no
YDR395W::chr4_7	YDR395W	SXM1	1.24932	-0.0365986	0.0154862	0.628733	yes	no	yes	no
YDR402C::chr4_7	YDR402C	DIT2	0.280349	-0.420609	0.388855	0.888406	yes	no	yes	no
YDR403W::chr4_7	YDR403W	DIT1	1.44773	1.0432	0.00552076	0.0148919	no	no	no	no
YDR405W::chr4_7	YDR405W	MRP20	0.43694	0.174313	0.279161	0.436402	no	no	no	no
YDR406W::chr4_7	YDR406W	PDR15	0.915584	0.536555	0.065319	0.158834	yes	no	yes	no
YDR409W::chr4_7	YDR409W	SIZ1	0.935213	-0.251172	0.0606217	0.795478	yes	no	yes	no
YDR411C::chr4_7	YDR411C	DFM1	-0.233463	0.307559	0.761769	0.319615	no	no	no	no
YDR414C::chr4_7	YDR414C	ERD1	1.75769	0.658011	0.000841294	0.100162	no	no	yes	no
YDR417C::chr00_17a/chr00_18	YDR417C	YDR417C	1.31124	1.92265	0.0113859	1.27533e-05	no	no	no	yes
YDR418W::chr4_7	YDR418W	RPL12B	0.395796	0.681714	0.306529	0.0908502	no	no	no	no
YDR419W::chr4_7	YDR419W	RAD30	-0.155962	-0.269058	0.712951	0.807032	no	no	no	no
YDR421W::chr4_7	YDR421W	ARO80	0.312901	-0.69747	0.364934	0.968519	no	no	no	no
YDR423C::chr4_7	YDR423C	CAD1	0.326824	0.474835	0.354856	0.195921	no	no	no	no
YDR424C::chr00_8	YDR424C	DYN2	1.38397	1.06634	0.0078031	0.0129883	yes	no	yes	no
YDR425W::chr4_7	YDR425W	SNX41	1.11808	1.07608	0.0284911	0.0122522	yes	no	yes	no
YDR426C::chr4_7	YDR426C	YDR426C	0.944549	0.0213297	0.0584823	0.57703	no	no	no	no
YDR430C::chr4_7	YDR430C	CYM1	0.00323323	0.0720138	0.600236	0.530644	no	no	no	no
YDR431W::chr4_7	YDR431W	YDR431W	0.0790646	-0.840039	0.54269	0.985728	no	no	no	no
YDR432W::chr4_7	YDR432W	NPL3	0.480647	0.480647	0.251456	0.192219	yes	yes	yes	yes
YDR433W::chr4_7	YDR433W	YDR433W	0.0674372	0.559724	0.551604	0.146185	no	no	no	no
YDR436W::chr4_7	YDR436W	PPZ2	0.723624	0.231632	0.127119	0.384807	no	no	no	no
YDR440W::chr4_8	YDR440W	DOT1	0.809824	0.0718702	0.0956188	0.530776	no	no	no	no
YDR444W::chr00_17a	YDR444W	YDR444W	0.698793	0.813223	0.137403	0.050483	no	yes	no	yes
YDR445C::chr00_14	YDR445C	YDR445C	1.16446	-0.0432165	0.0231198	0.634513	no	no	no	no
YDR446W::chr4_8	YDR446W	ECM11	0.832648	0.428118	0.0883323	0.227212	no	no	no	no
YDR447C::chr4_8	YDR447C	RPS17B	1.48777	0.516655	0.00441117	0.170254	no	no	no	no
YDR448W::chr4_8	YDR448W	ADA2	-0.163704	0.185191	0.718034	0.426498	no	yes	no	yes
YDR451C::chr4_8	YDR451C	YHP1	0.855043	0.360536	0.0815934	0.277093	yes	no	yes	no
YDR452W::chr4_8	YDR452W	PPN1	0.562291	-0.510618	0.203861	0.923153	no	no	no	no
YDR461W::chr00_17a	YDR461W	MFA1	0.83477	0.55142	0.0876766	0.150638	no	no	no	no
YDR463W::chr4_8	YDR463W	STP1	1.04275	1.16873	0.0394017	0.00687447	no	no	no	no
YDR466W::chr4_8	YDR466W	PKH3	0.84854	0.174549	0.0835091	0.436187	no	no	no	no
YDR479C::chr4_8	YDR479C	PEX29	-0.42196	-0.0910276	0.85921	0.675297	no	no	no	no
YDR481C::chr4_8	YDR481C	PHO8	0.570918	0.11932	0.199166	0.486957	no	no	no	no
YDR484W::chr4_8	YDR484W	VPS52	0.011162	-0.306467	0.594298	0.829875	yes	no	yes	no
YDR488C::chr4_8	YDR488C	PAC11	0.415	0.0289897	0.293607	0.570072	no	no	no	no
YDR490C::chr4_8	YDR490C	PKH1	-0.239146	-0.253339	0.765161	0.796899	no	no	no	no
YDR491C::chr4_8	YDR491C	YDR491C	1.09111	-0.186952	0.0320659	0.750735	no	no	no	no
YDR493W::chr00_17a	YDR493W	MZM1	0.0375945	-0.642043	0.574352	0.95828	no	no	no	no
YDR495C::chr4_8	YDR495C	VPS3	0.632559	1.90293	0.167551	1.55949e-05	no	no	no	yes
YDR500C::chr00_17a	YDR500C	RPL37B	1.29562	0.414085	0.0123196	0.237134	yes	no	yes	no
YDR501W::chr4_8	YDR501W	PLM2	0.128185	-0.138016	0.504849	0.713433	no	no	no	no
YDR503C::chr4_8	YDR503C	LPP1	0.485389	0.455254	0.24854	0.208705	no	no	no	no
YDR504C::chr4_8	YDR504C	SPG3	1.24932	0.870292	0.0154862	0.0381645	yes	no	yes	no
YDR505C::chr4_8	YDR505C	PSP1	0.132142	-0.264846	0.501795	0.804348	no	no	no	no
YDR506C::chr00_17a	YDR506C	GMC1	0.543142	0.213105	0.214515	0.401308	no	no	no	no
YDR507C::chr4_8	YDR507C	GIN4	-0.402185	-0.2762	0.850484	0.811532	no	no	no	no
YDR508C::chr4_8	YDR508C	GNP1	0.224861	0.0427238	0.430568	0.557542	no	no	no	no
YDR509W::chr4_8	YDR509W	YDR509W	0.154472	1.14742	0.48456	0.00788081	no	no	no	no
YDR511W::chr4_8	YDR511W	ACN9	0.426199	0.426199	0.28619	0.228555	yes	yes	yes	yes
YDR512C::chr00_17a	YDR512C	EMI1	0.583741	-0.0176814	0.192309	0.612053	yes	no	yes	no
YDR512C::chr4_8	YDR512C	EMI1	-0.100068	0.121517	0.675036	0.484927	no	no	no	no
YDR513W::chr4_8	YDR513W	GRX2	0.472961	0.0131423	0.25622	0.584441	no	no	no	no
YDR514C::chr4_8	YDR514C	YDR514C	-0.287268	-0.322064	0.792786	0.838865	no	no	no	no
YDR516C::chr4_8	YDR516C	EMI2	2.24932	0.597273	2.13288e-05	0.127159	yes	no	yes	no
YDR518W::chr4_8	YDR518W	EUG1	0.210219	-0.350939	0.441727	0.854675	no	no	no	no
YDR523C::chr4_8	YDR523C	SPS1	0.766964	0.33935	0.110479	0.293764	no	no	no	no
YDR524C::chr4_8	YDR524C	AGE1	0.55939	0.232862	0.205454	0.383718	no	no	no	no
YDR525W-A::chr00_2	YDR525W-A	SNA2	-0.0139255	0.17088	0.613007	0.439536	no	no	no	no
YDR525W::chr4_8	YDR525W	API2	0.850796	0.30253	0.0828408	0.323791	no	no	no	no
YDR528W::chr4_8	YDR528W	HLR1	0.23024	0.148504	0.426483	0.46005	no	no	no	no
YDR533C::chr4_8	YDR533C	HSP31	-0.356971	0.330242	0.829201	0.301072	no	no	no	no
YDR536W::chr00_2	YDR536W	STL1	0.370467	-0.276894	0.323944	0.811966	no	no	no	no
YDR537C::chr00_14	YDR537C	YDR537C	0.984195	0.375792	0.0500506	0.265381	no	no	no	no
YDR538W::chr00_2	YDR538W	PAD1	-0.0655792	0.393597	0.650667	0.252039	no	no	no	no
YDR539W::chr00_2	YDR539W	FDC1	-0.231343	-0.286948	0.760497	0.818181	no	no	no	no
YDR540C::chr00_2	YDR540C	IRC4	1.18119	-0.253339	0.0214043	0.796899	no	no	no	no
YEL001C::chr5_2	YEL001C	IRC22	-0.263329	0.155866	0.779291	0.453286	no	no	no	no
YEL003W::chr5_2	YEL003W	GIM4	0.804992	1.95989	0.0972165	8.67408e-06	no	no	no	yes
YEL010W::chr5_2	YEL010W	YEL010W	0.0789353	0.0955173	0.542789	0.508951	no	no	no	no
YEL011W::chr00_8	YEL011W	GLC3	0.679956	0.426457	0.145573	0.228374	yes	no	yes	no
YEL017C-A::chr5_2	YEL017C-A	PMP2	-0.355655	-0.0683075	0.828554	0.656141	no	no	no	no
YEL017W::chr5_2	YEL017W	GTT3	0.0250208	-0.260953	0.583867	0.801846	no	no	no	no
YEL018W::chr5_2	YEL018W	EAF5	-1.06305	-0.632208	0.989759	0.956208	no	no	no	no
YEL020C::chr5_2	YEL020C	YEL020C	0.216192	0.214626	0.437169	0.399946	no	no	no	no
YEL023C::chr5_2	YEL023C	YEL023C	-0.0802371	0.266483	0.661108	0.354345	no	no	no	no
YEL027W::chr5_2	YEL027W	VMA3	-0.18573	0.426199	0.732251	0.228555	no	yes	no	yes
YEL030W::chr5_2	YEL030W	ECM10	0.801478	0.132225	0.0983906	0.475043	no	no	no	no
YEL038W::chr5_2	YEL038W	UTR4	0.165258	-0.171207	0.476243	0.739021	no	no	no	no
YEL039C::chr5_2	YEL039C	CYC7	-0.747132	-0.470139	0.956	0.908707	no	no	no	no
YEL040W::chr5_2	YEL040W	UTR2	-0.112495	0.107372	0.683644	0.497996	no	no	no	no
YEL041W::chr5_2	YEL041W	YEF1	-0.243642	-0.0234533	0.767825	0.617166	no	no	no	no
YEL042W::chr5_2	YEL042W	GDA1	-0.306381	-0.23458	0.803202	0.7844	no	no	no	no
YEL048C::chr5_2	YEL048C	TCA17	-0.547529	-0.0206108	0.906545	0.614651	no	no	no	no
YEL049W::chr5_2	YEL049W	PAU2	-0.0911722	-0.362039	0.668817	0.860465	no	no	no	no
YEL050C::chr5_2	YEL050C	RML2	0.163755	1.67193	0.477401	0.000142003	no	no	no	yes
YEL054C::chr5_2	YEL054C	RPL12A	0.169274	-0.00746991	0.473148	0.602961	no	no	no	no
YEL056W::chr5_2	YEL056W	HAT2	-0.208098	-0.0846093	0.746309	0.66993	no	no	no	no
YEL057C::chr5_2	YEL057C	YEL057C	-0.146625	0.00822344	0.706766	0.58888	no	no	no	no
YEL059W::chr5_2	YEL059W	HHY1	-0.221619	0.325157	0.754615	0.305187	no	no	no	no
YEL060C::chr5_2	YEL060C	PRB1	0.56951	0.472261	0.199928	0.197574	no	no	no	no
YEL061C::chr5_2	YEL061C	CIN8	-0.263926	0.261	0.779634	0.359081	no	no	no	no
YEL062W::chr5_2	YEL062W	NPR2	0.664027	-0.170187	0.152732	0.738253	no	no	no	no
YEL066W::chr5_2	YEL066W	HPA3	-0.313591	-0.210327	0.807047	0.767596	no	no	no	no
YEL068C::chr5_2	YEL068C	YEL068C	-0.166558	0.214865	0.719896	0.399733	no	no	no	no
YEL071W::chr5_2	YEL071W	DLD3	0.0996162	0.0200484	0.526885	0.578192	no	no	no	no
YEL072W::chr5_2	YEL072W	RMD6	-0.236502	0.0366621	0.763586	0.56308	no	no	no	no
YER002W::chr5_2	YER002W	NOP16	0.673875	0.792819	0.148279	0.055589	no	no	no	no
YER004W::chr5_2	YER004W	FMP52	0.153358	0.463074	0.485419	0.203542	no	no	no	no
YER005W::chr5_2	YER005W	YND1	-0.149552	0.630568	0.708711	0.111792	no	no	no	no
YER007C-A::chr5_2	YER007C-A	TMA20	-0.416685	-0.355383	0.856917	0.857012	no	no	no	no
YER007W::chr5_2	YER007W	PAC2	-0.0922605	0.237501	0.669581	0.37962	no	no	no	no
YER010C::chr5_2	YER010C	YER010C	0.393938	-0.0397383	0.307792	0.631478	no	no	no	no
YER011W::chr5_2	YER011W	TIR1	0.160697	0.0340542	0.479759	0.565459	no	no	no	no
YER016W::chr5_3	YER016W	BIM1	0.557094	1.08884	0.20672	0.0113431	no	no	no	no
YER017C::chr5_3	YER017C	AFG3	0.778716	1.40851	0.106249	0.00126715	no	no	no	no
YER019W::chr5_3	YER019W	ISC1	0.188598	0.779689	0.458286	0.0590845	no	no	no	no
YER020W::chr5_3	YER020W	GPA2	0.570344	1.0727	0.199476	0.0125033	no	no	no	no
YER024W::chr5_3	YER024W	YAT2	0.791849	0.749854	0.101661	0.0676676	yes	no	yes	no
YER028C::chr5_3	YER028C	MIG3	-0.100743	0.293149	0.675507	0.331639	no	no	no	no
YER030W::chr5_3	YER030W	CHZ1	-0.337428	-0.251754	0.81943	0.79586	no	no	no	no
YER032W::chr5_3	YER032W	FIR1	-0.078815	0.263963	0.6601	0.356519	no	no	no	no
YER033C::chr5_3	YER033C	ZRG8	1.34006	1.05409	0.00982338	0.0139682	no	no	no	no
YER034W::chr5_3	YER034W	YER034W	0.226335	0.223805	0.429448	0.391754	no	no	no	no
YER037W::chr00_11	YER037W	PHM8	-0.266856	-0.203237	0.78131	0.762551	no	no	no	no
YER038W-A::chr5_3	YER038W-A	YER038W-A	-0.394317	-0.115613	0.846913	0.695514	no	no	no	no
YER040W::chr5_3	YER040W	GLN3	0.453506	0.626573	0.268488	0.113563	no	no	no	no
YER041W::chr5_3	YER041W	YEN1	0.466619	0.101618	0.260187	0.503314	no	no	no	no
YER042W::chr5_3	YER042W	MXR1	0.45368	0.337685	0.268377	0.295094	yes	no	yes	no
YER045C::chr5_3	YER045C	ACA1	-0.486083	-0.218055	0.885098	0.773028	no	no	no	no
YER046W::chr00_10	YER046W	SPO73	0.151965	-0.00417716	0.486494	0.600017	no	no	no	no
YER050C::chr5_3	YER050C	RSM18	-0.465447	-0.259356	0.877165	0.800815	no	no	no	no
YER051W::chr5_3	YER051W	JHD1	0.875507	0.274085	0.0757812	0.347815	yes	no	yes	no
YER053C::chr5_3	YER053C	PIC2	0.358452	0.745681	0.332344	0.0689415	no	no	no	no
YER055C::chr5_3	YER055C	HIS1	0.00972166	0.592206	0.595379	0.129621	no	no	no	no
YER057C::chr5_3	YER057C	HMF1	-0.124781	0.0282658	0.692056	0.57073	no	no	no	no
YER058W::chr5_3	YER058W	PET117	-0.137232	0.528628	0.70048	0.163321	no	no	no	no
YER059W::chr5_3	YER059W	PCL6	0.290153	1.10802	0.381601	0.0100868	no	no	no	no
YER060W-A::chr5_3	YER060W-A	FCY22	0.418685	1.00208	0.291157	0.0188686	no	no	no	no
YER060W::chr5_3	YER060W	FCY21	-0.447286	-0.277122	0.869872	0.812108	no	no	no	no
YER061C::chr5_3	YER061C	CEM1	-0.0998383	-0.0919372	0.674877	0.676055	no	no	no	no
YER062C::chr5_3	YER062C	HOR2	-0.526382	0.49729	0.899526	0.181859	no	no	no	no
YER064C::chr00_8	YER064C	VHR2	0.854912	0.172701	0.0816317	0.437874	no	no	no	no
YER065C::chr5_3	YER065C	ICL1	0.342649	-0.394078	0.343523	0.876288	no	no	no	no
YER067C-A::chr5_3	YER067C-A	YER067C-A	-0.0357463	0.82651	0.62907	0.0473638	no	no	no	no
YER068C-A::chr5_3	YER068C-A	YER068C-A	0.405596	0.437583	0.299903	0.220654	no	no	no	no
YER069W::chr5_3	YER069W	ARG5,6	-0.286994	0.474835	0.792634	0.195921	no	no	no	no
YER073W::chr5_3	YER073W	ALD5	0.278217	0.0714173	0.390437	0.531193	no	no	no	no
YER074W::chr5_3	YER074W	RPS24A	0.642577	1.81255	0.162736	3.8234e-05	no	no	no	yes
YER075C::chr5_3	YER075C	PTP3	0.600014	-0.145712	0.183818	0.71947	no	no	no	no
YER077C::chr00_8	YER077C	YER077C	0.587908	0.528628	0.190112	0.163321	no	no	no	no
YER078C::chr00_8	YER078C	ICP55	-0.207231	0.0822522	0.745772	0.521202	no	no	no	no
YER080W::chr5_3	YER080W	AIM9	0.349557	-0.00250544	0.338619	0.59852	no	no	no	no
YER087C-A::chr5_3	YER087C-A	YER087C-A	0.679956	-0.362039	0.145573	0.860465	yes	no	yes	no
YER087W::chr5_3	YER087W	AIM10	0.611915	0.65217	0.177759	0.102561	no	no	no	no
YER088C::chr00_8	YER088C	DOT6	0.435758	-1.05219	0.27993	0.996332	no	no	no	no
YER089C::chr00_17a	YER089C	PTC2	0.493973	-0.139861	0.243307	0.714885	no	no	no	no
YER090W::chr00_8	YER090W	TRP2	-0.250326	-0.138016	0.771755	0.713433	no	no	no	no
YER093C-A::chr00_8	YER093C-A	AIM11	0.159926	-0.0408268	0.480353	0.632429	no	no	no	no
YER095W::chr00_8	YER095W	RAD51	0.336222	1.36981	0.348109	0.0016971	no	no	no	no
YER098W::chr00_8	YER098W	UBP9	-0.357241	-0.0683075	0.829334	0.656141	no	no	no	no
YER101C::chr00_5	YER101C	AST2	0.218947	-0.382416	0.435069	0.870681	no	no	no	no
YER103W::chr00_5	YER103W	SSA4	0.633698	-0.215865	0.166999	0.771496	no	no	no	no
YER106W::chr00_5	YER106W	MAM1	0.251334	0.583769	0.41054	0.133793	no	no	no	no
YER108C::chr00_5	YER109C	FLO8	0.0695408	0.256218	0.549993	0.363231	no	no	no	no
YER109C::chr00_5	YER109C	FLO8	-0.38367	-0.302773	0.841992	0.8277	no	no	no	no
YER111C::chr00_5	YER111C	SWI4	0.137677	0.24772	0.497522	0.370643	no	no	no	no
YER113C::chr00_5	YER113C	TMN3	-0.267733	-0.194941	0.781811	0.75657	no	no	no	no
YER118C::chr00_5	YER118C	SHO1	3.28418	0.57125	5.4645e-10	0.140152	yes	no	yes	no
YER119C::chr00_5	YER119C	AVT6	-0.58206	-0.235417	0.917218	0.784967	no	no	no	no
YER120W::chr00_5	YER120W	SCS2	0.219266	-0.108949	0.434826	0.69009	no	no	no	no
YER121W::chr00_5	YER121W	YER121W	-0.280248	0.0322194	0.78888	0.567131	no	no	no	no
YER123W::chr00_5	YER123W	YCK3	0.0676599	0.645388	0.551433	0.105397	no	no	no	no
YER129W::chr00_5	YER129W	SAK1	-0.117054	0.565154	0.686777	0.143322	no	no	no	no
YER130C::chr00_5	YER130C	YER130C	0.394786	-0.586438	0.307215	0.94545	no	no	no	no
YER132C::chr00_5	YER132C	PMD1	-0.0117008	-0.0581833	0.611358	0.647471	no	no	no	no
YER134C::chr00_5	YER134C	YER134C	0.679956	-0.201574	0.145573	0.761358	yes	no	yes	no
YER135C::chr00_5	YER135C	YER135C	1.07961	0.405624	0.0336986	0.24323	no	no	no	no
YER137C::chr00_5	YER137C	YER137C	0.0919375	-0.0550107	0.532797	0.644738	no	no	no	no
YER140W::chr00_5	YER140W	YER140W	1.20083	0.29269	0.019528	0.332025	no	no	no	no
YER144C::chr00_2	YER144C	UBP5	1.47138	0.829813	0.00483865	0.0466129	no	no	no	no
YER145C::chr00_5	YER145C	FTR1	0.755376	0.595043	0.114767	0.128239	no	no	no	no
YER149C::chr00_5	YER149C	PEA2	-0.453211	0.227148	0.872284	0.388782	no	no	no	no
YER150W::chr00_5	YER150W	SPI1	1.11383	0.172701	0.029031	0.437874	no	no	no	no
YER151C::chr00_5	YER151C	UBP3	2.19356	-0.0527106	3.37856e-05	0.642751	no	no	yes	no
YER152C::chr00_5	YER152C	YER152C	-0.350777	0.185034	0.826142	0.426641	no	no	no	no
YER154W::chr00_5	YER154W	OXA1	0.280826	-0.462671	0.388501	0.905835	no	no	no	no
YER158C::chr00_5	YER158C	YER158C	0.0653315	0.129632	0.553215	0.477436	no	no	no	no
YER163C::chr00_5	YER163C	YER163C	-0.180116	0.422018	0.728661	0.231496	no	no	no	no
YER164W::chr00_5	YER164W	CHD1	-0.245978	0.00819064	0.769203	0.588909	no	no	no	no
YER166W::chr00_5	YER166W	DNF1	-0.88617	-0.407794	0.975872	0.882663	no	no	no	no
YER167W::chr00_5	YER167W	BCK2	0.326824	0.064959	0.354856	0.53714	no	no	no	no
YER170W::chr00_5	YER170W	ADK2	-0.591885	-0.4107	0.92008	0.883983	no	no	no	no
YER173W::chr00_5	YER173W	RAD24	0.0698867	0.423081	0.549728	0.230747	no	no	no	no
YER174C::chr00_5	YER174C	GRX4	-0.210234	-0.176367	0.747631	0.742891	no	no	no	no
YER175C::chr00_5	YER175C	TMT1	1.15202	0.772995	0.0244684	0.060932	yes	no	yes	no
YER179W::chr00_5	YER179W	DMC1	0.436767	0.0813451	0.279274	0.522039	no	no	no	no
YER180C::chr00_5	YER180C	ISC10	-0.00507534	0.36168	0.606434	0.276206	no	no	no	no
YER181C::chr00_5	YER181C	YER181C	0.361758	0.0752834	0.330025	0.52763	no	no	no	no
YER182W::chr00_5	YER182W	FMP10	0.631678	0.139585	0.167978	0.468259	no	no	no	no
YER183C::chr00_5	YER183C	FAU1	0.988299	0.303661	0.0492361	0.32285	no	no	no	no
YER184C::chr00_5	YER184C	YER184C	0.735013	0.528628	0.122586	0.163321	no	no	no	no
YER185W::chr00_5	YER185W	PUG1	0.251871	0.608153	0.410136	0.121984	no	no	no	no
YER187W::chr00_5	YER187W	YER187W	0.628891	0.486281	0.169336	0.188672	no	no	no	no
YER188W::chr00_2	YER188W	YER188W	0.507119	0.391124	0.23541	0.25387	yes	no	yes	no
YFL004W::chr00_17a	YFL004W	VTC2	-0.910017	-1.50127	0.978373	0.999901	no	no	no	no
YFL007W::chr00_17a	YFL007W	BLM10	0.341636	0.319963	0.344245	0.309415	no	no	no	no
YFL010W-A::chr00_17a	YFL010W-A	AUA1	-0.108562	-0.112702	0.68093	0.693149	no	no	no	no
YFL011W::chr6_1	YFL011W	HXT10	0.407891	0.356998	0.298361	0.279844	no	no	no	no
YFL012W::chr00_17a	YFL012W	YFL012W	0.314782	0.532085	0.363568	0.161354	no	no	no	no
YFL016C::chr00_17a	YFL016C	MDJ1	0.223059	-0.176832	0.431939	0.743238	no	no	no	no
YFL019C::chr00_15	YFL019C	YFL019C	0.737612	0.197283	0.121568	0.415543	no	no	no	no
YFL020C::chr6_1	YFL020C	PAU5	0.354838	-0.322064	0.334888	0.838865	no	no	no	no
YFL021W::chr6_1	YFL021W	GAT1	-0.0509808	-0.24942	0.640155	0.794324	no	no	no	no
YFL025C::chr6_1	YFL025C	BST1	-0.649818	-1.12489	0.935458	0.997811	no	no	no	no
YFL027C::chr6_1	YFL027C	GYP8	0.239361	0.361837	0.419573	0.276084	no	no	no	no
YFL028C::chr6_1	YFL028C	CAF16	-0.419044	0.678926	0.857946	0.0919109	no	no	no	no
YFL030W::chr6_1	YFL030W	AGX1	0.0112956	0.224204	0.594198	0.391399	no	no	no	no
YFL031W::chr6_1	YFL031W	HAC1	0.327537	0.207327	0.354343	0.406492	no	no	no	no
YFL035C-B::chr6_1	YFL034C-A	RPL22B	-0.126121	0.417119	0.692968	0.234969	no	no	no	no
YFL036W::chr6_1	YFL036W	RPO41	-0.293416	0.104859	0.796172	0.500319	no	no	no	no
YFL040W::chr6_1	YFL040W	YFL040W	-0.0601993	0.101618	0.646806	0.503314	no	no	no	no
YFL041W::chr6_1	YFL041W	FET5	0.415	0.34673	0.293607	0.287905	no	no	no	no
YFL042C::chr00_15	YFL042C	YFL042C	-0.175677	-0.244157	0.725807	0.790836	no	no	no	no
YFL043C::chr6_1	YFL042C	YFL042C	0.0930715	0.524517	0.531924	0.16568	no	no	no	no
YFL046W::chr6_1	YFL046W	FMP32	0.0839145	-0.0928298	0.538965	0.676798	no	no	no	no
YFL048C::chr6_1	YFL048C	EMP47	0.4024	0.305151	0.302057	0.321612	no	no	no	no
YFL049W::chr6_1	YFL049W	SWP82	0.0373172	0.729649	0.574562	0.074007	no	no	no	no
YFL051C::chr6_1	YFL051C	YFL051C	0.787798	0.55413	0.103061	0.149175	no	no	no	no
YFL052W::chr6_1	YFL052W	YFL052W	-0.00816046	0.136512	0.608729	0.471091	no	no	no	no
YFL053W::chr6_1	YFL053W	DAK2	0.107257	-0.0282301	0.520997	0.621382	no	no	no	no
YFL054C::chr6_1	YFL054C	YFL054C	-0.336831	0.0836956	0.819126	0.519869	no	no	no	no
YFL055W::chr6_1	YFL055W	AGP3	0.224861	0.294263	0.430568	0.330704	no	no	no	no
YFL056C::chr6_1	YFL056C	AAD6	0.865442	0.069196	0.0785991	0.533239	no	no	no	no
YFL063W::chr00_18	YFL063W	YFL063W	0.207806	-0.0812466	0.44357	0.667104	no	no	no	no
YFR006W::chr6_1	YFR006W	YFR006W	-0.0528198	0.417119	0.641485	0.234969	no	no	no	no
YFR009W::chr6_1	YFR009W	GCN20	0.87658	0.425507	0.0754855	0.22904	no	no	no	no
YFR011C::chr00_16b	YFR011C	AIM13	-1.07493	0.0785339	0.990368	0.524632	no	no	no	no
YFR012W::chr6_1	YFR012W	DCV1	0.163074	0.106467	0.477927	0.498833	no	no	no	no
YFR013W::chr00_16b	YFR013W	IOC3	1.48934	0.84423	0.00437204	0.0434466	no	no	no	no
YFR015C::chr6_1	YFR015C	GSY1	-0.57346	-0.0459397	0.91465	0.636882	no	no	no	no
YFR017C::chr6_1	YFR017C	IGD1	0.32189	0.253621	0.358416	0.365491	no	no	no	no
YFR018C::chr6_1	YFR018C	YFR018C	1.13175	0.589718	0.0268089	0.130842	no	no	no	no
YFR020W::chr6_1	YFR020W	YFR020W	-0.115111	0.0970302	0.685443	0.507554	no	no	no	no
YFR022W::chr6_1	YFR022W	ROG3	-0.249545	0.0447552	0.771298	0.555684	no	no	no	no
YFR023W::chr6_1	YFR023W	PES4	-0.178351	-0.407794	0.727528	0.882663	no	no	no	no
YFR024C-A::chr6_1	YFR024C-A	LSB3	0.895685	0.779689	0.0703645	0.0590845	yes	no	yes	no
YFR024C::chr00_15	YFR024C-A	LSB3	-0.427205	-0.173621	0.861466	0.740835	no	no	no	no
YFR026C::chr6_1	YFR026C	ULI1	0.366949	0.061753	0.326395	0.540089	no	no	no	no
YFR031C-A::chr6_1	YFR031C-A	RPL2A	1.70304	0.82151	0.0012009	0.048519	yes	no	yes	no
YFR034C::chr00_2	YFR034C	PHO4	0.213366	1.01261	0.439325	0.0177726	no	no	no	no
YFR038W::chr00_2	YFR038W	IRC5	-0.225543	-0.446009	0.756998	0.899187	no	no	no	no
YFR039C::chr00_14	YFR039C	YFR039C	-0.00980814	0.249371	0.609953	0.369199	no	no	no	no
YFR040W::chr00_2	YFR040W	SAP155	0.00275176	1.26893	0.600596	0.00351025	no	no	no	no
YFR041C::chr00_2	YFR041C	ERJ5	1.36962	0.531155	0.00841921	0.161882	yes	no	yes	no
YFR043C::chr00_2	YFR043C	IRC6	-0.0883588	-0.377412	0.66684	0.868221	no	no	no	no
YFR044C::chr00_2	YFR044C	DUG1	-0.0326288	0.334921	0.626788	0.297308	no	no	no	no
YFR045W::chr00_2	YFR045W	YFR045W	0.281153	-0.104312	0.388258	0.686291	no	no	no	no
YFR046C::chr00_2	YFR046C	CNN1	0.209589	-0.0683075	0.442208	0.656141	no	no	no	no
YFR047C::chr00_2	YFR047C	BNA6	-0.0565851	-0.218986	0.644203	0.773678	no	no	no	no
YFR053C::chr00_2	YFR053C	HXK1	0.794552	-0.230861	0.100735	0.78187	no	no	no	no
YFR054C::chr00_2	YFR054C	YFR054C	-0.321107	0.101618	0.811006	0.503314	no	no	no	no
YFR056C::chr00_2	YFR056C	YFR056C	-0.0427458	-0.0217649	0.634177	0.615672	no	no	no	no
YGL004C::chr7_1	YGL004C	RPN14	0.109199	0.0425383	0.5195	0.557712	no	no	no	no
YGL005C::chr7_1	YGL005C	COG7	-0.335155	0.118077	0.818271	0.488104	no	yes	no	yes
YGL007W::chr7_1	YGL007W	BRP1	-0.916867	-0.814551	0.97905	0.983443	no	no	no	no
YGL025C::chr7_1	YGL025C	PGD1	-0.596663	-0.930804	0.921445	0.991803	no	no	no	no
YGL026C::chr7_1	YGL026C	TRP5	0.110487	-0.344669	0.518507	0.851334	no	no	no	no
YGL027C::chr7_1	YGL027C	CWH41	-0.574226	-0.428203	0.914881	0.891712	no	no	no	no
YGL031C::chr7_1	YGL031C	RPL24A	-0.0341034	0.875507	0.627868	0.0371732	no	yes	no	yes
YGL032C::chr7_1	YGL032C	AGA2	0.508461	0.194727	0.234612	0.417853	no	no	no	no
YGL037C::chr7_1	YGL037C	PNC1	-0.405669	-0.240971	0.852047	0.788708	no	no	no	no
YGL042C::chr7_1	YGL042C	YGL042C	-0.557046	0.412819	0.909583	0.238041	no	no	no	no
YGL049C::chr7_1	YGL049C	TIF4632	0.00364715	-0.260953	0.599927	0.801846	no	no	no	no
YGL050W::chr7_1	YGL050W	TYW3	0.186343	-0.0893691	0.460018	0.673914	no	no	no	no
YGL054C::chr7_1	YGL054C	ERV14	0.272422	0.407142	0.394748	0.242131	no	no	no	no
YGL062W::chr7_1	YGL062W	PYC1	0.193774	0.108777	0.454314	0.496698	no	no	no	no
YGL066W::chr7_1	YGL066W	SGF73	0.0500791	0.579596	0.564861	0.13589	no	no	no	no
YGL067W::chr7_1	YGL067W	NPY1	0.207202	-0.0800527	0.444032	0.666098	no	no	no	no
YGL072C::chr7_1	YGL072C	YGL072C	0.0514642	-0.307978	0.563805	0.83076	no	no	no	no
YGL077C::chr7_1	YGL077C	HNM1	0.716714	0.18408	0.129925	0.427508	no	no	no	no
YGL078C::chr7_1	YGL078C	DBP3	0.658151	0.668658	0.155431	0.0958968	no	no	no	no
YGL079W::chr7_1	YGL079W	KXD1	0.0647453	-0.435251	0.553664	0.894717	no	no	no	no
YGL080W::chr7_1	YGL080W	FMP37	-0.645162	-0.345148	0.934314	0.851591	no	no	no	no
YGL081W::chr7_1	YGL081W	YGL081W	-0.0860245	0.328512	0.665197	0.302469	no	no	no	no
YGL082W::chr7_1	YGL082W	YGL082W	-0.143283	0.177544	0.704536	0.433456	no	no	no	no
YGL083W::chr7_1	YGL083W	SCY1	-0.109447	0.0954389	0.681541	0.509024	no	no	no	no
YGL084C::chr7_1	YGL084C	GUP1	-0.416246	-0.275138	0.856725	0.810867	no	no	no	no
YGL085W::chr7_1	YGL085W	LCL3	-0.301207	0.310204	0.800414	0.317429	no	no	no	no
YGL086W::chr7_1	YGL086W	MAD1	-0.269146	-0.0199445	0.782616	0.61406	no	no	no	no
YGL090W::chr7_1	YGL090W	LIF1	-0.231245	-0.00727807	0.760438	0.60279	no	no	no	no
YGL101W::chr7_2	YGL101W	YGL101W	0.0514642	0.0588044	0.563805	0.542799	no	no	no	no
YGL108C::chr7_2	YGL108C	YGL108C	0.44422	0.635299	0.274446	0.109721	no	no	no	no
YGL114W::chr7_2	YGL114W	YGL114W	-0.354979	-0.0864548	0.828221	0.671477	no	no	no	no
YGL115W::chr7_2	YGL115W	SNF4	0.322825	0.473262	0.357741	0.196929	no	no	no	no
YGL117W::chr7_2	YGL117W	YGL117W	-0.61193	-0.186385	0.925687	0.750318	no	no	no	no
YGL124C::chr7_2	YGL124C	MON1	-0.65115	0.398185	0.935782	0.248659	no	yes	no	yes
YGL126W::chr7_2	YGL126W	SCS3	-0.706191	-0.542239	0.948112	0.933174	no	no	no	no
YGL131C::chr7_2	YGL131C	SNT2	-0.112762	-0.0385602	0.683828	0.630449	no	no	no	no
YGL140C::chr7_2	YGL140C	YGL140C	-0.155192	0.288762	0.712444	0.335335	no	no	no	no
YGL141W::chr7_2	YGL141W	HUL5	0.834284	0.516655	0.0878264	0.170254	yes	no	yes	no
YGL143C::chr7_2	YGL143C	MRF1	-0.0677173	1.1687	0.652198	0.00687573	no	yes	no	yes
YGL144C::chr7_2	YGL144C	ROG1	-0.18385	0.231253	0.731052	0.385142	no	no	no	no
YGL146C::chr7_2	YGL146C	RRT6	-0.24676	-0.220311	0.769663	0.7746	no	no	no	no
YGL147C::chr7_2	YGL147C	RPL9A	0.392443	0.77509	0.30881	0.0603489	no	no	no	no
YGL148W::chr7_2	YGL148W	ARO2	1.51238	1.58374	0.00383242	0.000307216	no	yes	no	yes
YGL149W::chr7_2	YGL149W	YGL149W	-0.323928	0.32401	0.812479	0.306118	no	no	no	no
YGL152C::chr7_2	YGL152C	YGL152C	0.302371	0.0471697	0.37262	0.553473	no	no	no	no
YGL153W::chr7_2	YGL153W	PEX14	0.172045	0.604882	0.471015	0.123524	no	no	no	no
YGL154C::chr7_2	YGL154C	LYS5	0.519822	0.0948283	0.227916	0.509588	no	no	no	no
YGL156W::chr7_2	YGL156W	AMS1	0.0521294	0.0616511	0.563298	0.540183	no	no	no	no
YGL157W::chr7_2	YGL157W	ARI1	-0.324291	-0.0683075	0.812668	0.656141	no	no	no	no
YGL158W::chr7_2	YGL158W	RCK1	0.0289412	0.069196	0.580905	0.533239	no	no	no	no
YGL159W::chr7_2	YGL159W	YGL159W	0.0514642	0.721769	0.563805	0.0765986	no	no	no	no
YGL160W::chr7_2	YGL160W	AIM14	-0.450955	0.0248019	0.871369	0.573879	no	no	no	no
YGL161C::chr7_2	YGL161C	YIP5	0.11993	-0.408383	0.511221	0.882932	no	no	no	no
YGL162W::chr7_2	YGL162W	SUT1	0.216192	0.36663	0.437169	0.272385	no	no	no	no
YGL163C::chr7_2	YGL163C	RAD54	0.667084	0.838583	0.15134	0.0446654	no	no	no	no
YGL164C::chr7_2	YGL164C	YRB30	-0.247768	0.507119	0.770255	0.175908	no	yes	no	yes
YGL165C::chr7_2	YGL165C	YGL165C	-0.394317	-0.331342	0.846913	0.844063	no	no	no	no
YGL166W::chr7_2	YGL166W	CUP2	0.0451173	0.507885	0.568638	0.17545	no	no	no	no
YGL167C::chr7_2	YGL167C	PMR1	-0.183069	0.381409	0.730553	0.261134	no	no	no	no
YGL168W::chr7_2	YGL168W	HUR1	-0.497605	-0.00922827	0.889366	0.604531	no	no	no	no
YGL170C::chr7_2	YGL170C	SPO74	0.0954515	0.257093	0.530092	0.36247	no	no	no	no
YGL175C::chr7_2	YGL175C	SAE2	0.938258	0.0931559	0.0599172	0.511133	no	no	no	no
YGL176C::chr7_2	YGL176C	YGL176C	-0.173972	0.443592	0.724707	0.216548	no	no	no	no
YGL177W::chr7_2	YGL177W	YGL177W	0.250778	0.611433	0.410958	0.120453	no	no	no	no
YGL179C::chr7_2	YGL179C	TOS3	-0.377156	-0.228088	0.838931	0.779972	no	no	no	no
YGL180W::chr7_2	YGL180W	ATG1	0.376864	-0.341326	0.319507	0.849532	no	no	no	no
YGL181W::chr7_2	YGL181W	GTS1	0.413562	0.702605	0.294566	0.0831894	no	no	no	no
YGL194C::chr7_3	YGL194C	HOS2	1.1886	0.361377	0.0206793	0.276441	no	no	no	no
YGL203C::chr7_3	YGL203C	KEX1	0.45368	-0.697939	0.268377	0.968596	yes	no	yes	no
YGL205W::chr7_3	YGL205W	POX1	-0.453211	0.217613	0.872284	0.397276	no	yes	no	yes
YGL209W::chr7_3	YGL209W	MIG2	1.39587	0.280842	0.00732304	0.342048	no	no	no	no
YGL210W::chr7_3	YGL210W	YPT32	1.60001	0.607494	0.00228358	0.122293	no	no	no	no
YGL215W::chr7_3	YGL215W	CLG1	1.44333	0.421658	0.00565667	0.23175	no	no	no	no
YGL216W::chr7_3	YGL216W	KIP3	1.25059	0.174735	0.015391	0.436017	no	no	no	no
YGL217C::chr7_3/chr00_12	YGL217C	YGL217C	1.92543	0.403444	0.000264315	0.244814	yes	no	yes	no
YGL220W::chr7_3	YGL220W	FRA2	0.578498	0.995823	0.195095	0.0195469	no	no	no	no
YGL222C::chr7_3	YGL222C	EDC1	0.627709	0.606853	0.169914	0.122595	no	no	no	no
YGL224C::chr7_3	YGL224C	SDT1	-0.145929	-0.54106	0.706302	0.93282	no	no	no	no
YGL226C-A::chr7_3	YGL226C-A	OST5	0.679956	0.362327	0.145573	0.275705	yes	no	yes	no
YGL227W::chr7_3	YGL227W	VID30	0.895685	0.642186	0.0703645	0.106756	yes	no	yes	no
YGL229C::chr7_3	YGL229C	SAP4	0.217613	-0.161417	0.436086	0.731597	yes	no	yes	no
YGL230C::chr7_3	YGL230C	YGL230C	0.860544	0.0934436	0.079999	0.510867	no	no	no	no
YGL231C::chr7_3	YGL231C	EMC4	0.210293	-0.172143	0.44167	0.739726	no	no	no	no
YGL232W::chr7_3	YGL232W	TAN1	1.11579	0.56455	0.0287803	0.143638	no	no	no	no
YGL235W::chr7_3/chr00_12	YGL235W	YGL235W	0.249322	-0.866674	0.412055	0.987821	yes	no	yes	no
YGL236C::chr7_3	YGL236C	MTO1	1.45368	0.615219	0.00534158	0.118703	yes	no	yes	no
YGL242C::chr7_3	YGL242C	YGL242C	0.660318	0.0822522	0.154432	0.521202	no	no	no	no
YGL250W::chr7_3	YGL250W	RMR1	0.344128	0.00444884	0.342471	0.592278	no	no	no	no
YGL251C::chr7_3	YGL251C	HFM1	0.786923	-0.322409	0.103365	0.83906	no	no	no	no
YGL253W::chr7_3	YGL253W	HXK2	0.272528	-0.316235	0.394669	0.835542	no	no	no	no
YGL254W::chr7_3	YGL254W	FZF1	-0.0496687	-0.0683075	0.639204	0.656141	no	no	no	no
YGL256W::chr7_3	YGL256W	ADH4	0.0166012	0.00917125	0.590212	0.588025	no	no	no	no
YGL257C::chr7_3	YGL257C	MNT2	0.679956	0.637961	0.145573	0.108568	yes	no	yes	no
YGL259W::chr7_3	YGL259W	YPS5	0.0129538	-0.279812	0.592953	0.813783	no	no	no	no
YGL260W::chr7_3	YGL260W	YGL260W	0.240942	0.984804	0.418377	0.0207914	no	no	no	no
YGL261C::chr7_3	YGL261C	PAU11	0.249322	-0.3521	0.412055	0.855288	yes	no	yes	no
YGL263W::chr7_3	YGL263W	COS12	0.583741	0.034786	0.192309	0.564792	yes	no	yes	no
YGR003W::chr7_3	YGR003W	CUL3	0.507119	-0.331342	0.23541	0.844063	yes	no	yes	no
YGR004W::chr7_3	YGR004W	PEX31	0.834284	0.834284	0.0878264	0.0456117	yes	yes	yes	yes
YGR007W::chr7_3	YGR007W	ECT1	1.06561	1.02361	0.0357794	0.0166859	yes	no	yes	no
YGR008C::chr7_3	YGR008C	STF2	0.552403	0.0946311	0.209322	0.50977	no	no	no	no
YGR011W::chr7_3/chr00_12	YGR011W	YGR011W	0.895685	0.0572234	0.0703645	0.544252	yes	no	yes	no
YGR012W::chr7_3	YGR012W	YGR012W	0.443412	0.5444	0.274967	0.154473	no	no	no	no
YGR015C::chr7_3	YGR015C	YGR015C	0.960179	0.682464	0.0550338	0.0905666	no	no	no	no
YGR018C::chr7_3/chr00_12	YGR018C	YGR018C	0.581979	-0.119533	0.193243	0.698685	no	no	no	no
YGR021W::chr7_3	YGR021W	YGR021W	-0.00164715	0.243637	0.60388	0.374222	no	no	no	no
YGR023W::chr7_3	YGR023W	MTL1	0.132689	0.291588	0.501373	0.332952	no	no	no	no
YGR025W::chr7_3/chr00_12	YGR025W	YGR025W	0.327698	0.327621	0.354227	0.303189	no	no	no	no
YGR027C::chr7_4	YGR027C	RPS25A	0.694277	3.04317	0.139332	5.01521e-12	no	yes	no	yes
YGR028W::chr00_14	YGR028W	MSP1	0.0308095	0.328415	0.579492	0.302547	no	no	no	no
YGR031W::chr7_4	YGR031W	IMO32	-0.301207	-0.0127152	0.800414	0.607639	no	no	no	no
YGR032W::chr00_14	YGR032W	GSC2	0.204028	-0.17366	0.446459	0.740865	no	no	no	no
YGR033C::chr7_4	YGR033C	TIM21	-0.407559	-0.122463	0.85289	0.701046	no	no	no	no
YGR034W::chr7_4	YGR034W	RPL26B	0.208028	0.750612	0.443401	0.0674382	no	no	no	no
YGR035C::chr7_4	YGR035C	YGR035C	-0.0651401	-0.147742	0.650353	0.721053	no	no	no	no
YGR036C::chr7_4	YGR036C	CAX4	-0.161483	0.632132	0.71658	0.111104	no	no	no	no
YGR037C::chr7_4	YGR037C	ACB1	0.000976724	0.247952	0.601922	0.37044	no	no	no	no
YGR038W::chr00_14	YGR038W	ORM1	-0.757846	-0.128428	0.957896	0.705826	no	no	no	no
YGR039W::chr7_4	YGR039W	YGR039W	0.24899	0.11932	0.412305	0.486957	no	no	no	no
YGR040W::chr00_14	YGR040W	KSS1	0.319734	0.2751	0.359976	0.346946	no	no	no	no
YGR041W::chr7_4	YGR041W	BUD9	-0.0767759	-0.375489	0.658653	0.867268	no	no	no	no
YGR042W::chr7_4	YGR042W	YGR042W	-0.329496	-0.539379	0.815366	0.932312	no	no	no	no
YGR043C::chr7_4	YGR043C	NQM1	-0.309381	-0.309316	0.804808	0.831541	no	no	no	no
YGR044C::chr7_4	YGR044C	RME1	0.208382	0.0676992	0.44313	0.534618	no	no	no	no
YGR045C::chr7_4	YGR045C	YGR045C	-0.134804	0.18669	0.698846	0.425137	no	no	no	no
YGR049W::chr7_4	YGR049W	SCM4	-0.571565	-0.409924	0.914076	0.883632	no	no	no	no
YGR050C::chr00_14	YGR050C	YGR050C	-0.0261002	0.294263	0.621995	0.330704	no	no	no	no
YGR051C::chr7_4	YGR051C	YGR051C	-0.213745	-0.445967	0.749796	0.89917	no	no	no	no
YGR052W::chr7_4	YGR052W	FMP48	-0.256486	-0.400266	0.775343	0.879194	no	no	no	no
YGR053C::chr00_14	YGR053C	YGR053C	-0.176581	-0.280716	0.726389	0.814344	no	no	no	no
YGR054W::chr7_4	YGR054W	YGR054W	0.0228564	0.604651	0.5855	0.123633	no	no	no	no
YGR058W::chr7_4	YGR058W	PEF1	-0.351083	0.0605225	0.826294	0.54122	no	no	no	no
YGR061C::chr7_4	YGR061C	ADE6	-0.097674	0.39826	0.673368	0.248603	no	no	no	no
YGR064W::chr7_4	YGR064W	YGR064W	-0.257486	0.791849	0.775922	0.0558414	no	yes	no	yes
YGR066C::chr7_4	YGR066C	YGR066C	-0.390783	-0.264798	0.845291	0.804317	no	no	no	no
YGR067C::chr7_4	YGR067C	YGR067C	0.183151	0.150527	0.462471	0.45819	no	no	no	no
YGR069W::chr7_4	YGR069W	YGR069W	0.302492	0.253621	0.372532	0.365491	no	no	no	no
YGR072W::chr7_4	YGR072W	UPF3	-0.472819	0.372265	0.880042	0.268067	no	no	no	no
YGR077C::chr7_4	YGR077C	PEX8	-0.115805	0.13274	0.68592	0.474569	no	no	no	no
YGR078C::chr7_4	YGR078C	PAC10	0.480647	0.480647	0.251456	0.192219	yes	yes	yes	yes
YGR079W::chr7_4	YGR079W	YGR079W	-0.0113871	0.221513	0.611125	0.393796	no	no	no	no
YGR080W::chr7_4	YGR080W	TWF1	-0.263046	-0.0331181	0.779129	0.625681	no	no	no	no
YGR081C::chr7_4	YGR081C	SLX9	0.0502649	0.556183	0.564719	0.148073	no	no	no	no
YGR084C::chr7_4	YGR084C	MRP13	-0.372029	-0.399281	0.836495	0.878734	no	no	no	no
YGR085C::chr7_4	YGR085C	RPL11B	-0.279348	0.205615	0.788376	0.408031	no	no	no	no
YGR086C::chr00_14	YGR086C	PIL1	-1.1411	0.400246	0.993215	0.247149	no	no	no	no
YGR087C::chr7_4	YGR087C	PDC6	0.0715193	0.34673	0.548477	0.287905	no	no	no	no
YGR088W::chr7_4	YGR088W	CTT1	-0.0986648	0.374863	0.674059	0.266087	no	no	no	no
YGR096W::chr7_4	YGR096W	TPC1	0.619622	0.430498	0.173902	0.225553	no	no	no	no
YGR097W::chr7_4	YGR097W	ASK10	0.439149	0.381	0.277726	0.261442	no	no	no	no
YGR101W::chr7_4	YGR101W	PCP1	-0.159631	0.743335	0.715366	0.0696655	no	no	no	no
YGR102C::chr7_4	YGR102C	GTF1	-0.263355	0.41942	0.779306	0.233334	no	no	no	no
YGR106C::chr00_14	YGR106C	VOA1	-0.594744	-0.133403	0.920899	0.709784	no	no	no	no
YGR110W::chr00_14	YGR110W	CLD1	0.813223	0.434193	0.0945066	0.222991	yes	no	yes	no
YGR111W::chr7_4	YGR111W	YGR111W	-0.00471439	-0.107682	0.606166	0.689053	no	no	no	no
YGR112W::chr7_4	YGR112W	SHY1	-0.710728	-0.74913	0.949037	0.9761	no	no	no	no
YGR117C::chr00_14	YGR117C	YGR117C	0.0481757	0.0918425	0.56631	0.512346	no	no	no	no
YGR118W::chr7_4	YGR118W	RPS23A	1.34124	1.0248	0.00976372	0.0165722	no	no	no	no
YGR123C::chr7_5	YGR123C	PPT1	0.1226	-0.496401	0.509161	0.918292	no	no	no	no
YGR124W::chr7_5	YGR124W	ASN2	-0.247269	-0.0550107	0.769962	0.644738	no	no	no	no
YGR125W::chr7_5	YGR125W	YGR125W	-0.61641	0.270494	0.926898	0.350893	no	no	no	no
YGR126W::chr7_5	YGR126W	YGR126W	-0.914658	-0.898382	0.978833	0.989961	no	no	no	no
YGR127W::chr7_5	YGR127W	YGR127W	0.345683	-0.00637975	0.341366	0.601987	no	no	no	no
YGR129W::chr7_5	YGR129W	SYF2	-0.0667422	0.891051	0.6515	0.0343427	no	no	no	no
YGR130C::chr7_5	YGR130C	YGR130C	0.462352	0.121517	0.262873	0.484927	no	no	no	no
YGR131W::chr7_5	YGR131W	FHN1	0.217613	-0.576454	0.436086	0.942846	yes	no	yes	no
YGR133W::chr7_5	YGR133W	PEX4	-0.331904	0.0785339	0.816606	0.524632	no	no	no	no
YGR139W::chr7_5	YGR139W	YGR139W	0.104647	0.165183	0.523009	0.444746	no	no	no	no
YGR141W::chr7_5	YGR141W	VPS62	-0.273986	-0.281037	0.78536	0.814543	no	no	no	no
YGR143W::chr7_5	YGR143W	SKN1	-0.0161161	0.253621	0.614629	0.365491	no	no	no	no
YGR144W::chr7_5	YGR144W	THI4	0.011162	-0.242337	0.594298	0.789622	yes	no	yes	no
YGR146C::chr7_5	YGR146C	ECL1	-0.134097	0.539375	0.698369	0.157257	no	no	no	no
YGR149W::chr7_5	YGR149W	YGR149W	-0.201672	-0.035886	0.74231	0.628108	no	no	no	no
YGR157W::chr7_5	YGR157W	CHO2	0.293951	-0.0884854	0.378802	0.673175	no	no	no	no
YGR160W::chr7_5	YGR160W	YGR160W	0.426199	0.426199	0.28619	0.228555	yes	yes	yes	yes
YGR165W::chr7_5	YGR165W	MRPS35	0.232436	0.239623	0.424817	0.37775	no	no	no	no
YGR166W::chr7_5	YGR166W	TRS65	0.386849	-0.33961	0.312633	0.848601	no	no	no	no
YGR168C::chr7_5	YGR168C	YGR168C	-0.565392	-0.383316	0.912186	0.87112	no	no	no	no
YGR169C::chr7_5	YGR169C	PUS6	0.603796	-0.0144406	0.181879	0.609174	no	no	no	no
YGR173W::chr7_5	YGR173W	RBG2	0.131752	0.00475596	0.502096	0.592002	no	no	no	no
YGR174C::chr7_5	YGR174C	CBP4	-0.152344	-0.871616	0.710562	0.988179	no	no	no	no
YGR177C::chr7_5	YGR177C	ATF2	-0.00747623	0.787303	0.60822	0.0570371	no	no	no	no
YGR178C::chr7_5	YGR178C	PBP1	0.406612	0.00208183	0.29922	0.594405	no	no	no	no
YGR187C::chr7_5	YGR187C	HGH1	2.00136	0.665412	0.000151491	0.0971827	no	no	yes	no
YGR189C::chr7_5	YGR189C	CRH1	-0.33476	0.341083	0.818069	0.292383	no	no	no	no
YGR192C::chr7_5	YGR192C	TDH3	-0.0622796	-0.034444	0.648301	0.626844	no	no	no	no
YGR193C::chr7_5	YGR193C	PDX1	0.310722	-0.127201	0.366521	0.704845	yes	no	yes	no
YGR196C::chr7_5	YGR196C	FYV8	0.263577	0.689122	0.401352	0.088076	no	no	no	no
YGR197C::chr7_5	YGR197C	SNG1	-0.39313	-0.246645	0.84637	0.792489	no	no	no	no
YGR200C::chr7_5	YGR200C	ELP2	0.584233	1.09567	0.192049	0.0108809	no	no	no	no
YGR205W::chr7_5	YGR205W	TDA10	-0.858264	-0.57956	0.97264	0.943666	no	no	no	no
YGR206W::chr7_5	YGR206W	MVB12	0.0358276	0.761767	0.575692	0.0641314	no	no	no	no
YGR207C::chr7_5	YGR207C	CIR1	0.163461	0.133326	0.477628	0.474028	no	no	no	no
YGR208W::chr7_5	YGR208W	SER2	-0.191583	0.0833118	0.735967	0.520224	no	yes	no	yes
YGR209C::chr7_5	YGR209C	TRX2	-0.312795	0.0529988	0.806625	0.54813	no	no	no	no
YGR210C::chr00_8	YGR210C	YGR210C	0.0541238	-0.25841	0.561778	0.800203	no	no	no	no
YGR212W::chr7_5	YGR212W	SLI1	0.533733	-0.398953	0.219866	0.878581	no	no	no	no
YGR213C::chr7_5	YGR213C	RTA1	-0.197585	0.54551	0.73975	0.153862	no	no	no	no
YGR215W::chr7_5	YGR215W	RSM27	-0.179366	0.30008	0.728181	0.325833	no	no	no	no
YGR221C::chr00_2	YGR221C	TOS2	-0.00140215	0.287454	0.603698	0.33644	no	no	no	no
YGR222W::chr00_2	YGR222W	PET54	-0.21651	0.594658	0.751494	0.128426	no	no	no	no
YGR223C::chr00_2	YGR223C	HSV2	1.48065	0.227148	0.00459263	0.388782	yes	no	yes	no
YGR224W::chr00_2	YGR224W	AZR1	-0.364686	-0.409082	0.832964	0.883249	no	no	no	no
YGR225W::chr00_2	YGR225W	AMA1	0.0231847	0.358265	0.585253	0.278858	no	no	no	no
YGR226C::chr00_2	YGR226C	YGR226C	1.1066	0.210765	0.02997	0.403406	no	no	no	no
YGR228W::chr00_2	YGR228W	YGR228W	-0.2217	-0.420093	0.754665	0.888179	no	no	no	no
YGR229C::chr00_2	YGR229C	SMI1	-0.80627	-0.831945	0.965657	0.985034	no	no	no	no
YGR231C::chr00_2	YGR231C	PHB2	-0.0601993	0.224957	0.646806	0.390729	no	no	no	no
YGR232W::chr00_2	YGR232W	NAS6	1.11069	0.634491	0.0294356	0.110073	no	no	no	no
YGR234W::chr00_2	YGR234W	YHB1	-0.150791	0.277021	0.709533	0.345304	no	no	no	no
YGR235C::chr00_2	YGR235C	MOS2	1.64308	0.113022	0.00175341	0.492775	no	no	no	no
YGR237C::chr00_2	YGR237C	YGR237C	0.415	0.718289	0.293607	0.0777652	no	no	no	no
YGR238C::chr00_14	YGR238C	KEL2	-0.418564	-0.543216	0.857737	0.933467	no	no	no	no
YGR241C::chr00_2	YGR241C	YAP1802	-0.234093	-0.127605	0.762147	0.705168	no	no	no	no
YGR242W::chr00_2	YGR242W	YGR242W	-0.236927	0.0416653	0.76384	0.55851	no	no	no	no
YGR243W::chr00_2	YGR243W	FMP43	-0.209334	-0.108537	0.747074	0.689753	no	no	no	no
YGR247W::chr00_2	YGR247W	CPD1	1.32861	0.531452	0.0104202	0.161713	no	no	no	no
YGR248W::chr00_14	YGR248W	SOL4	-0.134958	0.0228404	0.69895	0.57566	no	no	no	no
YGR249W::chr00_2	YGR249W	MGA1	-0.226477	-0.362221	0.757563	0.860558	no	no	no	no
YGR250C::chr00_14	YGR250C	YGR250C	-0.446638	-0.638623	0.869607	0.957569	no	no	no	no
YGR252W::chr00_17a	YGR252W	GCN5	0.936952	1.24932	0.0602186	0.00401922	no	yes	no	yes
YGR256W::chr00_3	YGR256W	GND2	1.13737	0.40874	0.0261428	0.240976	no	no	no	no
YGR257C::chr00_17a	YGR257C	MTM1	1.95866	2.11756	0.00020769	1.56728e-06	no	no	yes	yes
YGR259C::chr00_3	YGR259C	YGR259C	-0.455159	-0.50271	0.87307	0.920477	no	no	no	no
YGR260W::chr00_3	YGR260W	TNA1	0.274295	0.00969501	0.393353	0.587553	no	no	no	no
YGR266W::chr00_3	YGR266W	YGR266W	-0.192683	-0.0258722	0.736662	0.619303	no	no	no	no
YGR268C::chr00_3	YGR268C	HUA1	-0.20391	-0.00417716	0.743707	0.600017	no	no	no	no
YGR269W::chr00_3	YGR269W	YGR269W	0.300629	0.772995	0.373897	0.060932	no	no	no	no
YGR273C::chr00_17a	YGR273C	YGR273C	0.286895	0.384865	0.384007	0.258538	no	no	no	no
YGR276C::chr00_17a	YGR276C	RNH70	0.977094	0.720188	0.0514851	0.0771268	no	no	no	no
YGR279C::chr00_3	YGR279C	SCW4	-0.0112423	0.198307	0.611017	0.414618	no	no	no	no
YGR281W::chr00_3	YGR281W	YOR1	0.845634	0.563961	0.0843759	0.143947	no	no	no	no
YGR282C::chr00_3	YGR282C	BGL2	0.849734	0.555387	0.0831547	0.1485	no	no	no	no
YGR283C::chr00_3	YGR283C	YGR283C	-0.196892	-0.115995	0.739315	0.695824	no	no	no	no
YGR284C::chr00_3	YGR284C	ERV29	-0.161601	0.12634	0.716658	0.480474	no	no	no	no
YGR286C::chr00_3	YGR286C	BIO2	0.171546	0.0418754	0.471399	0.558318	no	no	no	no
YGR288W::chr00_3	YGR288W	MAL13	1.09872	0.643567	0.031021	0.106168	no	no	no	no
YGR289C::chr00_17a	YGR289C	MAL11	1.20575	0.294263	0.0190808	0.330704	no	no	no	no
YGR291C::chr00_17a	YGR291C	YGR291C	1.58015	0.668658	0.00257394	0.0958968	no	no	no	no
YGR292W::chr00_17a	YGR292W	MAL12	-0.108562	0.20234	0.68093	0.41098	no	no	no	no
YGR295C::chr00_17b	YGR295C	COS6	0.367819	-0.32528	0.325788	0.84068	no	no	no	no
YHL002W::chr00_10	YHL002W	HSE1	0.849352	0.478181	0.0832679	0.193785	no	no	no	no
YHL003C::chr8_1	YHL003C	LAG1	-0.464493	-0.378263	0.87679	0.868642	no	no	no	no
YHL005C::chr8_1	YHL005C	YHL005C	-0.671576	-0.552058	0.9406	0.936071	no	no	no	no
YHL006C::chr8_1	YHL006C	SHU1	-0.409914	-0.489604	0.853936	0.915887	no	no	no	no
YHL007C::chr8_1	YHL007C	STE20	-0.125636	-0.390236	0.692638	0.87446	no	no	no	no
YHL009C::chr8_1	YHL009C	YAP3	-0.231945	0.124338	0.760859	0.482323	no	no	no	no
YHL010C::chr8_1	YHL010C	ETP1	0.393166	0.0498739	0.308317	0.550995	no	no	no	no
YHL012W::chr8_1	YHL012W	YHL012W	-0.0601993	-0.367868	0.646806	0.863442	no	no	no	no
YHL013C::chr8_1	YHL013C	OTU2	0.440481	1.08056	0.276863	0.0119265	no	no	no	no
YHL016C::chr8_1	YHL016C	DUR3	0.0165329	0.000405251	0.590263	0.59591	no	no	no	no
YHL017W::chr8_1	YHL017W	YHL017W	-0.500112	-0.245185	0.890279	0.79152	no	no	no	no
YHL019C::chr8_1	YHL019C	APM2	-0.281579	0.234255	0.789624	0.382486	no	no	no	no
YHL020C::chr8_1	YHL020C	OPI1	0.669938	0.917193	0.150049	0.0299829	no	no	no	no
YHL022C::chr8_1	YHL022C	SPO11	0.272784	-0.374735	0.394478	0.866892	no	no	no	no
YHL023C::chr8_1	YHL023C	NPR3	0.152025	-0.101474	0.486448	0.683955	yes	no	yes	no
YHL024W::chr00_8	YHL024W	RIM4	1.56669	0.680944	0.0027892	0.0911422	no	no	no	no
YHL026C::chr8_1	YHL026C	YHL026C	-0.050664	0.133326	0.639925	0.474028	no	no	no	no
YHL030W::chr8_1	YHL030W	ECM29	0.152025	-0.285899	0.486448	0.817539	yes	no	yes	no
YHL034C::chr8_1	YHL034C	SBP1	1.58374	1.46775	0.00251908	0.000798515	yes	no	yes	yes
YHL036W::chr8_1	YHL036W	MUP3	-0.265138	-0.635348	0.780328	0.956878	no	no	no	no
YHL037C::chr8_1	YHL037C	YHL037C	0.192332	0.865805	0.45542	0.0390347	no	no	no	no
YHL042W::chr8_1	YHL042W	YHL042W	0.301621	0.298708	0.373169	0.326979	no	no	no	no
YHL043W::chr8_1	YHL043W	ECM34	-0.801412	0.368556	0.964936	0.270905	no	no	no	no
YHL046C::chr8_1	YHL046C	PAU13	0.372564	-0.0896811	0.322486	0.674174	no	no	no	no
YHR001W-A::chr8_1	YHR001W-A	QCR10	-0.249492	0.24855	0.771267	0.369917	no	no	no	no
YHR003C::chr00_10	YHR003C	YHR003C	0.331849	0.832682	0.351243	0.0459684	no	no	no	no
YHR004C::chr00_10	YHR004C	NEM1	-0.469479	0.0185358	0.878745	0.579563	no	no	no	no
YHR006W::chr00_10	YHR006W	STP2	-0.112546	-0.392096	0.683679	0.875348	no	no	no	no
YHR008C::chr00_10	YHR008C	SOD2	-0.386177	0.180679	0.84316	0.430601	no	no	no	no
YHR009C::chr00_10	YHR009C	TDA3	-0.301207	-0.58914	0.800414	0.946138	no	no	no	no
YHR010W::chr8_1	YHR010W	RPL27A	1.16592	0.611812	0.0229654	0.120277	no	no	no	no
YHR012W::chr8_1	YHR012W	VPS29	0.217613	-0.898382	0.436086	0.989961	yes	no	yes	no
YHR016C::chr00_8	YHR016C	YSC84	0.748916	0.344386	0.117208	0.28976	no	no	no	no
YHR017W::chr00_8	YHR017W	YSC83	-0.139151	0.370978	0.701769	0.26905	no	no	no	no
YHR018C::chr8_1	YHR018C	ARG4	-0.216545	0.114759	0.751515	0.49117	no	no	no	no
YHR021C::chr8_1	YHR021C	RPS27B	0.806239	0.551589	0.0968023	0.150547	no	no	no	no
YHR021W-A::chr00_3	YHR021W-A	ECM12	-0.722848	0.377949	0.951447	0.263746	no	no	no	no
YHR033W::chr8_1	YHR033W	YHR033W	-0.339009	-0.248129	0.820233	0.793472	no	no	no	no
YHR034C::chr8_1	YHR034C	PIH1	0.271978	0.955539	0.395079	0.0244262	no	no	no	no
YHR035W::chr8_1	YHR035W	YHR035W	-0.199328	0.373202	0.740844	0.267352	no	no	no	no
YHR037W::chr8_1	YHR037W	PUT2	0.166297	-0.348415	0.475442	0.853336	no	no	no	no
YHR038W::chr8_1	YHR038W	RRF1	1.06561	0.949614	0.0357794	0.0252236	yes	no	yes	no
YHR041C::chr00_10	YHR041C	SRB2	0.395923	0.539555	0.306442	0.157156	no	no	no	no
YHR044C::chr8_1	YHR044C	DOG1	-0.113274	0.29269	0.68418	0.332025	no	no	no	no
YHR045W::chr00_8	YHR045W	YHR045W	-0.314343	-0.249914	0.807445	0.79465	no	no	no	no
YHR046C::chr8_2	YHR046C	INM1	0.347885	-0.58914	0.339803	0.946138	no	no	no	no
YHR047C::chr8_2	YHR047C	AAP1	0.394313	-0.107197	0.307536	0.688656	no	no	no	no
YHR048W::chr8_2	YHR048W	YHK8	0.174131	0.407031	0.469409	0.242211	no	no	no	no
YHR049C-A::chr8_2	YHR049C-A	YHR049C-A	-0.526767	0.0960793	0.899657	0.508432	no	no	no	no
YHR049W::chr8_2	YHR049W	FSH1	-0.578436	-0.628608	0.916143	0.955429	no	no	no	no
YHR051W::chr8_2	YHR051W	COX6	0.712598	0.154085	0.131617	0.454921	no	no	no	no
YHR057C::chr8_2	YHR057C	CPR2	-0.346295	-0.17849	0.823906	0.744475	no	no	no	no
YHR059W::chr00_10	YHR059W	FYV4	0.038279	1.36233	0.573832	0.00179425	no	no	no	no
YHR067W::chr00_10	YHR067W	HTD2	0.124343	0.0170143	0.507815	0.58094	no	no	no	no
YHR073W::chr8_2	YHR073W	OSH3	0.276338	0.487211	0.391834	0.188091	no	no	no	no
YHR075C::chr8_2	YHR075C	PPE1	0.242414	-0.101474	0.417265	0.683955	no	no	no	no
YHR076W::chr8_2	YHR076W	PTC7	0.485799	0.391124	0.248289	0.25387	no	no	no	no
YHR077C::chr8_2	YHR077C	NMD2	-0.0294028	0.239121	0.624422	0.378193	no	no	no	no
YHR078W::chr8_2	YHR078W	YHR078W	0.043057	0.582618	0.570204	0.134369	no	no	no	no
YHR079C-B::chr00_3	YHR079C-A	SAE3	0.471382	-0.0326836	0.257205	0.625299	no	no	no	no
YHR079C::chr8_2	YHR079C	IRE1	0.0833118	-0.103073	0.539428	0.685272	yes	no	yes	no
YHR082C::chr8_2	YHR082C	KSP1	-0.038173	0.0572234	0.630843	0.544252	no	no	no	no
YHR086W::chr8_2	YHR086W	NAM8	-0.264496	0.378493	0.77996	0.263335	no	no	no	no
YHR087W::chr8_2	YHR087W	RTC3	-0.373157	-0.466857	0.837033	0.907453	no	no	no	no
YHR091C::chr8_2	YHR091C	MSR1	-0.204325	-0.103569	0.743965	0.685679	no	no	no	no
YHR092C::chr8_2	YHR092C	HXT4	-0.0757873	0.374211	0.657951	0.266584	no	no	no	no
YHR093W::chr8_2	YHR093W	AHT1	0.480152	0.18949	0.251761	0.422596	no	no	no	no
YHR094C::chr8_2	YHR094C	HXT1	0.904262	0.542418	0.0681542	0.155567	no	no	no	no
YHR095W::chr8_2	YHR095W	YHR095W	0.426199	0.310204	0.28619	0.317429	yes	no	yes	no
YHR096C::chr8_2	YHR096C	HXT5	0.156643	0.209994	0.482885	0.404098	no	no	no	no
YHR097C::chr8_2	YHR097C	YHR097C	-0.407516	0.0191553	0.852871	0.579001	no	no	no	no
YHR100C::chr8_2	YHR100C	GEP4	-0.0339608	-0.52276	0.627764	0.927128	no	no	no	no
YHR103W::chr8_2	YHR103W	SBE22	-0.420085	-0.211432	0.858398	0.768378	no	no	no	no
YHR104W::chr8_2	YHR104W	GRE3	-0.199328	0.143197	0.740844	0.464933	no	no	no	no
YHR105W::chr8_2	YHR105W	YPT35	-0.330955	0.310722	0.816118	0.317001	no	yes	no	yes
YHR106W::chr8_2	YHR106W	TRR2	-0.204183	-0.191882	0.743877	0.754345	no	no	no	no
YHR108W::chr8_2	YHR108W	GGA2	-0.127178	0.143197	0.693686	0.464933	no	no	no	no
YHR110W::chr8_2	YHR110W	ERP5	0.26206	-0.733572	0.402488	0.973998	no	no	no	no
YHR111W::chr8_2	YHR111W	UBA4	-0.281308	0.915584	0.789473	0.0302372	no	yes	no	yes
YHR113W::chr8_2	YHR113W	APE4	0.533115	-0.0683075	0.22022	0.656141	yes	no	yes	no
YHR116W::chr8_2	YHR116W	COX23	-0.274735	-0.241144	0.785783	0.788824	no	no	no	no
YHR117W::chr8_2	YHR117W	TOM71	-0.450955	-0.0225038	0.871369	0.616326	no	no	no	no
YHR121W::chr8_2	YHR121W	LSM12	0.0095801	0.550602	0.595485	0.151082	no	no	no	no
YHR123W::chr8_2	YHR123W	EPT1	0.0268468	0.229373	0.582488	0.386808	no	no	no	no
YHR126C::chr8_2	YHR126C	ANS1	0.0245627	-0.0683075	0.584213	0.656141	no	no	no	no
YHR129C::chr8_2	YHR129C	ARP1	-0.0947566	-0.035886	0.671329	0.628108	no	no	no	no
YHR130C::chr8_2	YHR130C	YHR130C	-0.24676	0.142259	0.769663	0.465796	no	no	no	no
YHR131C::chr00_10	YHR131C	YHR131C	-0.791258	-0.450555	0.963388	0.901034	no	no	no	no
YHR132C::chr8_2	YHR132C	ECM14	0.495259	0.221199	0.242528	0.394075	no	no	no	no
YHR132W-A::chr00_17b	YHR132W-A	IGO2	-0.436644	-0.730675	0.865462	0.97359	no	no	no	no
YHR133C::chr8_2	YHR133C	NSG1	0.716714	0.571103	0.129925	0.140228	no	no	no	no
YHR134W::chr8_2	YHR134W	WSS1	-0.0122712	0.365679	0.611781	0.273117	no	no	no	no
YHR136C::chr8_2	YHR136C	SPL2	-0.35931	0.167321	0.830348	0.44279	no	no	no	no
YHR137W::chr8_2	YHR137W	ARO9	-0.0158052	0.286357	0.614399	0.337368	no	no	no	no
YHR138C::chr8_2	YHR138C	YHR138C	0.398185	-0.203237	0.304907	0.762551	yes	no	yes	no
YHR140W::chr00_8	YHR140W	YHR140W	0.658151	-0.523987	0.155431	0.927521	no	no	no	no
YHR142W::chr8_3	YHR142W	CHS7	0.423933	0.227148	0.287684	0.388782	no	no	no	no
YHR146W::chr00_15	YHR146W	CRP1	0.324397	0.364652	0.356606	0.273909	no	no	no	no
YHR152W::chr8_3	YHR152W	SPO12	1.45368	0.852258	0.00534158	0.04176	yes	no	yes	no
YHR155W::chr8_3	YHR155W	YSP1	0.935213	0.893218	0.0606217	0.0339624	yes	no	yes	no
YHR158C::chr8_3	YHR158C	KEL1	1.82379	0.900442	0.000539408	0.0327201	yes	no	yes	no
YHR159W::chr8_3	YHR159W	TDA11	0.45368	0.136051	0.268377	0.471516	yes	no	yes	no
YHR168W::chr00_8	YHR168W	MTG2	1.37846	0.056499	0.0080348	0.544917	no	no	no	no
YHR171W::chr00_15	YHR171W	ATG7	1.29562	0.253621	0.0123196	0.365491	yes	no	yes	no
YHR177W::chr8_3	YHR177W	YHR177W	0.916698	0.088197	0.0650452	0.515713	no	no	no	no
YHR181W::chr00_8	YHR181W	SVP26	0.426199	-0.274758	0.28619	0.810629	yes	no	yes	no
YHR184W::chr8_3	YHR184W	SSP1	0.676072	0.154085	0.147297	0.454921	no	no	no	no
YHR193C::chr00_8	YHR193C	EGD2	0.55865	0.00969501	0.205862	0.587553	yes	no	yes	no
YHR194W::chr00_10	YHR194W	MDM31	1.31072	1.31072	0.0114156	0.00261358	yes	yes	yes	yes
YHR198C::chr8_3	YHR198C	AIM18	0.177627	-0.0348845	0.466719	0.627231	no	no	no	no
YHR200W::chr8_3	YHR200W	RPN10	0.290153	0.260018	0.381601	0.359932	no	no	no	no
YHR202W::chr8_3	YHR202W	YHR202W	0.61633	0.34673	0.175543	0.287905	no	no	no	no
YHR203C::chr8_3	YHR203C	RPS4B	1.71439	1.07853	0.00111629	0.0120728	no	no	no	no
YHR206W::chr8_3	YHR206W	SKN7	0.49156	-0.601526	0.244772	0.949206	no	no	no	no
YHR209W::chr8_3	YHR209W	CRG1	0.589858	-0.010592	0.189089	0.605747	no	no	no	no
YIL001W::chr9_1	YIL001W	YIL001W	-0.696944	-0.692669	0.946183	0.967724	no	no	no	no
YIL002C::chr9_1	YIL002C	INP51	0.398185	0.28219	0.304907	0.340902	yes	no	yes	no
YIL006W::chr9_1	YIL006W	YIA6	0.34951	0.066342	0.338653	0.535867	no	no	no	no
YIL007C::chr9_1	YIL007C	NAS2	0.163196	0.0560206	0.477832	0.545356	no	no	no	no
YIL008W::chr9_1	YIL008W	URM1	-0.0346064	1.30192	0.628236	0.00278317	no	no	no	no
YIL009W::chr9_1	YIL009W	FAA3	0.143095	0.136807	0.49334	0.470819	no	no	no	no
YIL013C::chr9_1	YIL013C	PDR11	1.04429	-0.220311	0.0391483	0.7746	no	no	no	no
YIL014W::chr9_1	YIL014W	MNT3	-0.857024	-0.307094	0.972489	0.830243	no	no	no	no
YIL015C-A::chr9_1	YIL014C-A	YIL014C-A	-0.939188	-0.302773	0.981132	0.8277	no	no	no	no
YIL016W::chr9_1	YIL016W	SNL1	-0.140743	0.292095	0.702837	0.332526	no	no	no	no
YIL017C::chr9_1	YIL017C	VID28	-0.434339	-0.363001	0.864494	0.860959	no	no	no	no
YIL018W::chr9_1	YIL018W	RPL2B	-0.0122602	0.421658	0.611772	0.23175	no	no	no	no
YIL023C::chr9_1	YIL023C	YKE4	0.528868	0.0441672	0.222663	0.556222	no	no	no	no
YIL024C::chr9_1	YIL024C	YIL024C	-0.859857	-0.0419948	0.972834	0.633448	no	no	no	no
YIL027C::chr9_1	YIL027C	EMC5	0.0746595	0.273612	0.54607	0.348219	no	no	no	no
YIL028W::chr9_1	YIL028W	YIL028W	-0.00944131	-0.410413	0.609681	0.883854	no	no	no	no
YIL029C::chr9_1	YIL029C	YIL029C	0.381052	-0.632208	0.316616	0.956208	no	no	no	no
YIL030C::chr00_17b	YIL030C	SSM4	0.883217	1.0975	0.0736751	0.0107597	no	no	no	no
YIL032C::chr9_1	YIL032C	YIL032C	0.985097	0.446266	0.0498707	0.214735	no	no	no	no
YIL034C::chr9_1	YIL034C	CAP2	0.896732	-0.0683075	0.0700917	0.656141	no	no	no	no
YIL037C::chr9_1	YIL037C	PRM2	0.0207207	-0.108949	0.58711	0.69009	no	no	no	no
YIL039W::chr9_1	YIL039W	TED1	0.812535	0.251019	0.0947309	0.36776	no	no	no	no
YIL042C::chr9_1	YIL042C	PKP1	-0.348513	-0.276894	0.825015	0.811966	no	no	no	no
YIL043C::chr9_1	YIL043C	CBR1	0.223455	0.201782	0.431638	0.411483	no	no	no	no
YIL045W::chr9_1	YIL045W	PIG2	0.307602	-0.430352	0.368796	0.892635	no	no	no	no
YIL047C::chr9_1	YIL047C	SYG1	0.415	0.764939	0.293607	0.0632147	no	no	no	no
YIL050W::chr9_1	YIL050W	PCL7	-0.733793	-0.566648	0.953543	0.940194	no	no	no	no
YIL052C::chr9_1	YIL052C	RPL34B	0.806829	-0.509647	0.0966067	0.922828	no	no	no	no
YIL053W::chr9_1	YIL053W	RHR2	-0.558218	-0.883883	0.909952	0.989027	no	no	no	no
YIL054W::chr9_1	YIL054W	YIL054W	0.334636	0.304502	0.349245	0.322151	no	no	no	no
YIL055C::chr9_1	YIL055C	YIL055C	-0.806246	-0.603466	0.965654	0.949674	no	no	no	no
YIL056W::chr9_1	YIL056W	VHR1	-0.49081	-0.588812	0.886863	0.946055	no	no	no	no
YIL060W::chr9_1	YIL060W	YIL060W	-0.279139	-0.0927375	0.788259	0.676721	no	no	no	no
YIL064W::chr9_1	YIL064W	SEE1	-0.0783232	-0.442956	0.659751	0.897933	no	no	no	no
YIL065C::chr9_1	YIL065C	FIS1	-0.568666	-0.721147	0.913192	0.97221	no	no	no	no
YIL066C::chr9_1	YIL066C	RNR3	0.723739	0.476013	0.127073	0.195167	no	no	no	no
YIL070C::chr9_1	YIL070C	MAM33	-1.26566	-1.16102	0.996631	0.998323	no	no	no	no
YIL071C::chr9_1	YIL071C	PCI8	0.224861	-0.220311	0.430568	0.7746	no	no	no	no
YIL073C::chr9_1	YIL073C	SPO22	-0.281579	-0.453801	0.789624	0.902337	no	no	no	no
YIL074C::chr9_1	YIL074C	SER33	-0.0422891	0.569122	0.633844	0.141253	no	no	no	no
YIL076W::chr9_1	YIL076W	SEC28	0.388092	-0.266534	0.311782	0.805426	no	no	no	no
YIL077C::chr9_1	YIL077C	YIL077C	-0.154366	-0.489151	0.711899	0.915725	no	no	no	no
YIL079C::chr9_1	YIL079C	AIR1	-0.0128807	0.105341	0.612232	0.499874	no	no	no	no
YIL084C::chr9_1	YIL084C	SDS3	0.533115	-0.348415	0.22022	0.853336	yes	no	yes	no
YIL085C::chr9_1	YIL085C	KTR7	0.238312	-0.0567195	0.420366	0.646211	no	no	no	no
YIL086C::chr9_1	YIL086C	YIL086C	-0.177825	-0.0444608	0.72719	0.635596	no	no	no	no
YIL089W::chr9_1	YIL089W	YIL089W	0.502326	0.0807223	0.238273	0.522613	no	no	no	no
YIL092W::chr9_1	YIL092W	YIL092W	-0.234865	-0.592574	0.762608	0.947003	no	no	no	no
YIL093C::chr9_1	YIL093C	RSM25	0.201035	-0.22093	0.44875	0.775031	no	no	no	no
YIL095W::chr9_1	YIL095W	PRK1	0.935213	0.234255	0.0606217	0.382486	yes	no	yes	no
YIL097W::chr9_1	YIL097W	FYV10	-0.538247	-0.961392	0.90351	0.993261	no	no	no	no
YIL098C::chr9_2	YIL098C	FMC1	-0.691154	-0.910766	0.944947	0.990703	no	no	no	no
YIL099W::chr9_2	YIL099W	SGA1	1.41226	0.53073	0.00670407	0.162123	yes	no	yes	no
YIL100W::chr9_2	YIL100W	YIL100W	0.781782	0.507722	0.105165	0.175547	no	no	no	no
YIL102C::chr9_2	YIL102C	YIL102C	0.72576	0.0737115	0.12626	0.529079	yes	no	yes	no
YIL103W::chr9_2	YIL103W	DPH1	0.698793	0.770154	0.137403	0.0617295	no	yes	no	yes
YIL105C::chr9_2	YIL105C	SLM1	0.47817	-0.307409	0.252986	0.830427	no	no	no	no
YIL107C::chr9_2	YIL107C	PFK26	0.822175	1.05507	0.0916227	0.0138871	no	no	no	no
YIL108W::chr9_2	YIL108W	YIL108W	-0.455784	-0.0335421	0.873322	0.626053	no	no	no	no
YIL110W::chr9_2	YIL110W	HPM1	-0.409063	0.214626	0.853559	0.399946	no	no	no	no
YIL112W::chr9_2	YIL112W	HOS4	1.10031	0.671378	0.030807	0.094829	no	no	no	no
YIL114C::chr9_2	YIL114C	POR2	0.302371	-0.264032	0.37262	0.803826	no	no	no	no
YIL116W::chr9_2	YIL116W	HIS5	-0.679719	-1.23576	0.942439	0.999053	no	no	no	no
YIL117C::chr9_2	YIL117C	PRM5	-0.066104	0.463413	0.651043	0.203319	no	no	no	no
YIL120W::chr9_2	YIL120W	QDR1	-0.176046	-0.155053	0.726045	0.726715	no	no	no	no
YIL121W::chr9_2	YIL121W	QDR2	0.0773042	0.462207	0.544041	0.20411	no	no	no	no
YIL123W::chr9_2	YIL123W	SIM1	0.812612	1.20471	0.0947055	0.00543102	no	no	no	no
YIL130W::chr9_2	YIL130W	ASG1	0.382895	-1.32844	0.315348	0.999552	no	no	no	no
YIL131C::chr9_2	YIL131C	FKH1	-0.623136	-0.363763	0.928688	0.86135	no	no	no	no
YIL132C::chr9_2	YIL132C	CSM2	0.6144	0.219269	0.176509	0.395797	no	no	no	no
YIL133C::chr9_2	YIL133C	RPL16A	0.74212	0.288178	0.119816	0.335828	no	no	no	no
YIL135C::chr9_2	YIL135C	VHS2	-0.706049	0.326552	0.948082	0.304055	no	no	no	no
YIL136W::chr9_2	YIL136W	OM45	0.622844	-0.0683075	0.172307	0.656141	no	no	no	no
YIL137C::chr9_2	YIL137C	TMA108	-0.585937	1.01261	0.918356	0.0177726	no	no	no	no
YIL138C::chr9_2	YIL138C	TPM2	0.136601	-0.0970665	0.498352	0.680314	no	no	no	no
YIL140W::chr9_2	YIL140W	AXL2	-0.133751	0.0991492	0.698136	0.505595	no	no	no	no
YIL141W::chr9_2	YIL141W	YIL141W	0.162888	0.193295	0.47807	0.419149	no	no	no	no
YIL145C::chr9_2	YIL145C	PAN6	0.586682	0.168732	0.190757	0.4415	no	no	no	no
YIL146C::chr9_2	YIL146C	ATG32	0.587476	-0.640354	0.190339	0.95793	no	no	no	no
YIL149C::chr9_2	YIL149C	MLP2	-0.165383	-0.0514054	0.71913	0.641623	no	no	no	no
YIL155C::chr9_2	YIL155C	GUT2	-0.193059	0.0485062	0.7369	0.552249	no	no	no	no
YIL159W::chr9_2	YIL159W	BNR1	0.419933	0.34673	0.290329	0.287905	no	no	no	no
YIL161W::chr9_2	YIL161W	YIL161W	0.753934	0.166158	0.115308	0.443854	no	no	no	no
YIL163C::chr9_2	YIL163C	YIL163C	1.37436	0.104757	0.00821114	0.500413	no	no	no	no
YIL164C::chr9_2	YIL164C	NIT1	-0.770693	-0.67662	0.960082	0.964942	no	no	no	no
YIL165C::chr9_2	YIL165C	YIL165C	-0.242909	0.163639	0.767392	0.446159	no	no	no	no
YIL166C::chr9_2	YIL166C	YIL166C	-0.0593895	0.490183	0.646224	0.18624	no	no	no	no
YIL167W::chr9_2	YIL167W	SDL1	0.497159	-0.269941	0.241381	0.807592	no	no	no	no
YIL168W::chr9_2	YIL168W	YIL168W	-0.249425	0.0878117	0.771227	0.516069	no	no	no	no
YIL170W::chr9_2	YIL170W	HXT12	1.30545	0.938888	0.0117243	0.0267228	no	no	no	no
YIL173W::chr9_2	YIL173W	VTH1	0.605683	0.543127	0.180916	0.155175	no	no	no	no
YIR001C::chr9_2	YIR001C	SGN1	-0.149898	-0.366306	0.708941	0.862648	no	no	no	no
YIR002C::chr9_2	YIR002C	MPH1	-0.227207	0.0519867	0.758005	0.549058	no	no	no	no
YIR004W::chr9_2	YIR004W	DJP1	0.34047	-0.0385602	0.345076	0.630449	yes	no	yes	no
YIR013C::chr9_2	YIR013C	GAT4	-0.283825	-0.144035	0.790876	0.71816	no	no	no	no
YIR014W::chr9_2	YIR014W	YIR014W	0.813223	0.375299	0.0945066	0.265756	yes	no	yes	no
YIR017C::chr00_3	YIR017C	MET28	-0.162309	0.516655	0.717121	0.170254	no	no	no	no
YIR018W::chr00_3	YIR018W	YAP5	-0.380279	0.174549	0.840404	0.436187	no	no	no	no
YIR019C::chr00_3	YIR019C	MUC1	-0.493853	-0.593149	0.887989	0.947147	no	no	no	no
YIR020C::chr00_3	YIR020C	YIR020C	0.595699	0.101618	0.186046	0.503314	no	no	no	no
YIR020W-B::chr00_3	YIR020W-A	YIR020W-A	0.356511	0.359929	0.33371	0.277564	no	no	no	no
YIR023W::chr00_17b	YIR023W	DAL81	1.44001	0.186506	0.00576138	0.425303	yes	no	yes	no
YIR028W::chr00_3	YIR028W	DAL4	0.110846	-0.366747	0.518229	0.862873	no	no	no	no
YIR029W::chr00_3	YIR029W	DAL2	0.203585	0.122376	0.446799	0.484134	no	no	no	no
YIR031C::chr00_3	YIR031C	DAL7	0.537041	0.170479	0.217976	0.439903	no	no	no	no
YIR032C::chr00_17b	YIR032C	DAL3	-0.511425	-0.314745	0.894333	0.834686	no	no	no	no
YIR035C::chr00_3	YIR035C	YIR035C	-0.0864686	0.901319	0.66551	0.0325718	no	no	no	no
YIR037W::chr00_3	YIR037W	HYR1	0.45368	0.0157568	0.268377	0.582078	yes	no	yes	no
YIR038C::chr00_3	YIR038C	GTT1	0.25888	0.022295	0.40487	0.576155	no	no	no	no
YIR042C::chr00_3	YIR042C	YIR042C	-0.047921	-0.489445	0.637937	0.91583	no	no	no	no
YIR043C::chr00_17b	YIR043C	YIR043C	0.820783	0.202546	0.0920668	0.410794	no	no	no	no
YIR044C::chr00_17b	YIR044C	YIR044C	1.09307	0.207327	0.031794	0.406492	no	no	no	no
YJL003W::chr00_13	YJL003W	COX16	-0.504147	-0.410135	0.891738	0.883728	no	no	no	no
YJL007C::chr00_13	YJL007C	YJL007C	0.62079	-0.0276655	0.173323	0.620884	no	no	no	no
YJL012C::chr00_13	YJL012C	VTC4	0.628403	-0.0683075	0.169575	0.656141	no	no	no	no
YJL016W::chr00_13	YJL016W	YJL016W	0.599493	0.199698	0.184086	0.413362	no	no	no	no
YJL017W::chr00_13	YJL016W	YJL016W	0.45368	-0.0408268	0.268377	0.632429	yes	no	yes	no
YJL020C::chr00_13	YJL020C	BBC1	0.319088	-0.00488212	0.360444	0.600648	no	no	no	no
YJL023C::chr00_13	YJL023C	PET130	-0.687832	-0.958469	0.944227	0.993132	no	no	no	no
YJL027C::chr00_13	YJL027C	YJL027C	0.772042	-0.191456	0.108637	0.754034	no	no	no	no
YJL030W::chr10_2	YJL030W	MAD2	0.303655	0.263536	0.37168	0.356888	no	no	no	no
YJL036W::chr10_2	YJL036W	SNX4	-0.223205	1.25362	0.75558	0.00390229	no	no	no	no
YJL042W::chr00_15	YJL042W	MHP1	-1.04555	-0.607334	0.988801	0.950596	no	no	no	no
YJL043W::chr10_2	YJL043W	YJL043W	0.37056	0.329285	0.323879	0.301844	no	no	no	no
YJL044C::chr10_2	YJL044C	GYP6	0.506147	-0.113395	0.235989	0.693714	no	no	no	no
YJL046W::chr10_2	YJL046W	AIM22	1.2958	0.256623	0.012308	0.362878	no	no	no	no
YJL047C::chr10_2	YJL047C	RTT101	0.186656	0.289054	0.459777	0.335088	no	no	no	no
YJL048C::chr10_2	YJL048C	UBX6	0.780093	0.477661	0.105761	0.194116	no	no	no	no
YJL049W::chr10_2	YJL049W	YJL049W	0.609788	-0.0683075	0.178832	0.656141	no	no	no	no
YJL060W::chr10_2	YJL060W	BNA3	-0.496758	-0.436039	0.889056	0.89505	no	no	no	no
YJL062W::chr10_2	YJL062W	LAS21	0.816848	-0.0475489	0.0933307	0.63828	no	no	no	no
YJL064W::chr10_2	YJL064W	YJL064W	-0.344276	0.275647	0.822893	0.346478	no	no	no	no
YJL066C::chr10_2	YJL066C	MPM1	-0.160345	0.0360292	0.715834	0.563658	no	no	no	no
YJL068C::chr10_2	YJL068C	YJL068C	-0.132188	-0.0463927	0.697081	0.637276	no	no	no	no
YJL070C::chr00_15	YJL070C	YJL070C	0.0368403	-0.0874163	0.574924	0.672282	no	no	no	no
YJL077C::chr10_2	YJL077C	ICS3	-0.0922605	0.706986	0.669581	0.0816464	no	no	no	no
YJL078C::chr00_15	YJL078C	PRY3	-0.153309	0.163983	0.7112	0.445844	no	no	no	no
YJL079C::chr10_2	YJL079C	PRY1	-0.0713613	-0.115995	0.6548	0.695824	no	no	no	no
YJL080C::chr10_2	YJL080C	SCP160	-0.747464	-0.138697	0.956059	0.713969	no	no	no	no
YJL082W::chr10_2	YJL082W	IML2	0.382765	0.0228404	0.315437	0.57566	no	no	no	no
YJL083W::chr10_2	YJL083W	TAX4	-0.425903	-0.14631	0.860908	0.719937	no	no	no	no
YJL084C::chr10_2	YJL084C	ALY2	0.40885	0.722369	0.297717	0.0763991	no	no	no	no
YJL088W::chr10_2	YJL088W	ARG3	-0.3411	-0.30412	0.821292	0.828495	no	no	no	no
YJL092W::chr10_2	YJL092W	SRS2	0.125295	0.769826	0.50708	0.0618221	no	no	no	no
YJL093C::chr10_2	YJL093C	TOK1	0.20019	0.414475	0.449397	0.236856	no	no	no	no
YJL094C::chr00_15	YJL094C	KHA1	-0.370332	0.171896	0.835683	0.438608	no	no	no	no
YJL096W::chr10_2	YJL096W	MRPL49	1.19887	-0.0239134	0.0197094	0.617573	no	no	no	no
YJL098W::chr10_2	YJL098W	SAP185	0.34047	-0.311579	0.345076	0.832856	yes	no	yes	no
YJL100W::chr10_2	YJL100W	LSB6	-0.213745	0.434193	0.749796	0.222991	no	no	no	no
YJL101C::chr00_15	YJL101C	GSH1	0.480647	-0.220311	0.251456	0.7746	yes	no	yes	no
YJL102W::chr10_2	YJL102W	MEF2	1.1195	0.222142	0.0283122	0.393235	no	no	no	no
YJL103C::chr00_18	YJL103C	GSM1	0.480647	-0.31342	0.251456	0.833922	yes	no	yes	no
YJL106W::chr10_2	YJL106W	IME2	-0.261241	0.470112	0.778091	0.19896	no	no	no	no
YJL110C::chr10_2	YJL110C	GZF3	-0.0794612	-0.658432	0.660558	0.961556	no	no	no	no
YJL112W::chr10_2	YJL112W	MDV1	0.11383	0.0141547	0.515928	0.583527	no	no	no	no
YJL116C::chr10_2	YJL116C	NCA3	-0.442762	0.531605	0.86801	0.161626	no	no	no	no
YJL119C::chr10_2	YJL119C	YJL119C	0.613904	0.0453493	0.176759	0.55514	no	no	no	no
YJL121C::chr10_2	YJL121C	RPE1	-0.0217841	0.87991	0.618816	0.0363527	no	no	no	no
YJL122W::chr10_2	YJL122W	ALB1	0.105418	0.338318	0.522415	0.294589	no	no	no	no
YJL124C::chr10_2	YJL124C	LSM1	0.636328	1.41202	0.165728	0.0012335	no	no	no	no
YJL126W::chr10_2	YJL126W	NIT2	0.353464	0.57215	0.335858	0.139688	no	no	no	no
YJL130C::chr10_1	YJL130C	URA2	-0.569343	-0.832252	0.913399	0.985061	no	no	no	no
YJL132W::chr00_14	YJL132W	YJL132W	-0.635626	0.317751	0.931922	0.311224	no	no	no	no
YJL133W::chr10_1	YJL133W	MRS3	0.895685	0.101618	0.0703645	0.503314	yes	no	yes	no
YJL134W::chr10_1	YJL134W	LCB3	-0.219907	0.00603984	0.753572	0.590846	no	no	no	no
YJL135W::chr10_1	YJL135W	YJL135W	-0.342346	-0.268385	0.821921	0.806605	no	no	no	no
YJL136C::chr00_14	YJL136C	RPS21B	0.229307	0.426199	0.427191	0.228555	no	yes	no	yes
YJL137C::chr00_14	YJL137C	GLG2	0.207257	0.341976	0.44399	0.291673	no	no	no	no
YJL138C::chr10_1	YJL138C	TIF2	-0.434474	-0.766188	0.864551	0.978239	no	no	no	no
YJL139C::chr00_14	YJL139C	YUR1	-0.311332	-0.2936	0.805847	0.822222	no	no	no	no
YJL141C::chr00_14	YJL141C	YAK1	0.703515	0.979627	0.135404	0.0213989	no	no	no	no
YJL142C::chr10_1	YJL142C	IRC9	-0.425196	-0.306467	0.860605	0.829875	no	no	no	no
YJL144W::chr10_1	YJL144W	YJL144W	-0.258772	-0.386048	0.776666	0.872446	no	no	no	no
YJL145W::chr10_1	YJL145W	SFH5	-1.21479	-0.196632	0.995487	0.757795	no	no	no	no
YJL147C::chr10_1	YJL147C	YJL147C	-0.0867029	-0.154281	0.665675	0.72612	no	no	no	no
YJL148W::chr10_1	YJL148W	RPA34	0.39623	0.0312282	0.306234	0.568034	no	no	no	no
YJL150W::chr10_1	YJL150W	YJL150W	0.342227	-0.134195	0.343823	0.710412	no	no	no	no
YJL151C::chr00_14	YJL151C	SNA3	-0.194292	0.668658	0.737678	0.0958968	no	no	no	no
YJL152W::chr10_1	YJL152W	YJL152W	0.723884	0.432121	0.127014	0.224425	no	no	no	no
YJL154C::chr10_1	YJL154C	VPS35	-0.119761	-0.608876	0.688631	0.95096	no	no	no	no
YJL157C::chr10_1	YJL157C	FAR1	0.311769	0.281635	0.365758	0.341373	no	no	no	no
YJL158C::chr10_1	YJL158C	CIS3	0.0338618	-0.162351	0.577181	0.73231	no	no	no	no
YJL159W::chr10_1	YJL159W	HSP150	0.0341412	-0.836982	0.57697	0.985469	no	no	no	no
YJL160C::chr00_14	YJL160C	YJL160C	0.28983	-0.0561328	0.38184	0.645705	no	no	no	no
YJL162C::chr10_1	YJL162C	JJJ2	-0.033466	-0.329775	0.627401	0.843193	no	no	no	no
YJL163C::chr00_14	YJL163C	YJL163C	-0.486399	-0.494507	0.885217	0.917627	no	no	no	no
YJL164C::chr10_1	YJL164C	TPK1	0.635599	-0.172143	0.16608	0.739726	no	no	no	no
YJL166W::chr10_1	YJL166W	QCR8	-0.221354	1.04717	0.754454	0.0145493	no	no	no	no
YJL170C::chr10_1	YJL170C	ASG7	-0.395948	0.134633	0.847658	0.472824	no	no	no	no
YJL171C::chr10_1	YJL171C	YJL171C	-0.834081	-0.601181	0.969556	0.949123	no	no	no	no
YJL172W::chr00_14	YJL172W	CPS1	0.430596	0.663496	0.283302	0.0979477	no	no	no	no
YJL178C::chr10_1	YJL178C	ATG27	-0.27115	-0.14082	0.783755	0.71564	no	no	no	no
YJL181W::chr10_1	YJL181W	YJL181W	0.964687	0.502441	0.0540698	0.178725	no	no	no	no
YJL182C::chr10_1	YJL182C	YJL182C	-0.104171	0.0600166	0.677889	0.541685	no	no	no	no
YJL185C::chr10_1	YJL185C	YJL185C	0.49156	-0.335246	0.244772	0.846217	no	no	no	no
YJL188C::chr10_1	YJL188C	BUD19	0.791849	0.791849	0.101661	0.0558414	yes	yes	yes	yes
YJL190C::chr10_1	YJL190C	RPS22A	-0.0585521	-0.098178	0.645621	0.681234	no	no	no	no
YJL191W::chr00_14	YJL191W	RPS14B	-1.06371	-0.430878	0.989793	0.89286	no	no	no	no
YJL192C::chr10_1	YJL192C	SOP4	-0.0731795	-0.28708	0.656096	0.818262	no	no	no	no
YJL193W::chr10_1	YJL193W	YJL193W	-0.00164715	-0.0225038	0.60388	0.616326	no	no	no	no
YJL196C::chr00_14	YJL196C	ELO1	0.973687	0.225424	0.0521847	0.390314	yes	no	yes	no
YJL197W::chr10_1	YJL197W	UBP12	1.07383	0.606292	0.0345453	0.122858	no	no	no	no
YJL199C::chr10_1	YJL199C	MBB1	0.517877	-0.00258332	0.229055	0.59859	no	no	no	no
YJL201W::chr10_1	YJL201W	ECM25	-0.0610734	-0.165918	0.647434	0.735024	no	no	no	no
YJL206C::chr00_14	YJL206C	YJL206C	0.131752	0.18408	0.502096	0.427508	no	no	no	no
YJL207C::chr10_1	YJL207C	LAA1	1.55677	0.253621	0.00295803	0.365491	no	no	no	no
YJL209W::chr10_1	YJL209W	CBP1	0.250588	0.188032	0.411101	0.423918	no	no	no	no
YJL210W::chr10_1	YJL210W	PEX2	0.77852	-0.459886	0.106318	0.904747	no	no	no	no
YJL211C::chr10_1	YJL211C	YJL211C	-0.203175	0.248365	0.743249	0.370079	no	no	no	no
YJL213W::chr00_14	YJL213W	YJL213W	-0.674886	-0.3521	0.941353	0.855288	no	no	no	no
YJL215C::chr10_1	YJL215C	YJL215C	-1.12224	-1.10002	0.992491	0.997381	no	no	no	no
YJL216C::chr10_1	YJL216C	IMA5	0.63265	0.0836956	0.167506	0.519869	yes	no	yes	no
YJL217W::chr10_1	YJL217W	REE1	0.672075	-0.197205	0.149086	0.75821	no	no	no	no
YJL218W::chr10_1	YJL218W	YJL218W	0.485986	0.204313	0.248174	0.409203	no	no	no	no
YJR001W::chr00_13	YJR001W	AVT1	-0.239807	-0.598822	0.765554	0.948548	no	no	no	no
YJR003C::chr00_17b	YJR003C	YJR003C	-0.48517	0.0148337	0.884756	0.582913	no	no	no	no
YJR004C::chr00_13	YJR004C	SAG1	0.677731	0.264268	0.146559	0.356256	no	no	no	no
YJR005W::chr00_13	YJR005W	APL1	0.135856	0.221199	0.498927	0.394075	no	no	no	no
YJR008W::chr00_13	YJR008W	MHO1	0.0332116	-0.210327	0.577674	0.767596	no	no	no	no
YJR009C::chr00_13	YJR009C	TDH2	-0.317418	-0.301142	0.809069	0.826734	no	no	no	no
YJR010W::chr00_13	YJR010W	MET3	0.317702	0.0602767	0.361448	0.541446	no	no	no	no
YJR011C::chr00_13	YJR011C	YJR011C	0.796403	0.628765	0.100105	0.112588	no	no	no	no
YJR015W::chr00_13	YJR015W	YJR015W	0.184219	0.0386077	0.46165	0.561304	no	no	no	no
YJR019C::chr00_13	YJR019C	TES1	-0.00371356	0.618753	0.60542	0.117086	no	no	no	no
YJR020W::chr00_13	YJR020W	YJR020W	0.508822	0.150527	0.234398	0.45819	no	no	no	no
YJR024C::chr00_13	YJR024C	MDE1	-0.209285	-0.187889	0.747044	0.751423	no	no	no	no
YJR030C::chr00_13	YJR030C	YJR030C	0.542288	0.176805	0.214997	0.43413	no	no	no	no
YJR031C::chr00_13	YJR031C	GEA1	0.885206	0.181671	0.0731392	0.429698	no	no	no	no
YJR033C::chr00_13	YJR033C	RAV1	0.518972	0.466469	0.228414	0.201323	no	no	no	no
YJR036C::chr00_13	YJR036C	HUL4	0.22604	-0.453598	0.429673	0.902256	no	no	no	no
YJR037W::chr00_13	YJR037W	YJR037W	0.108094	-0.0625482	0.520352	0.651219	no	no	no	no
YJR038C::chr00_13	YJR038C	YJR038C	0.311132	0.432386	0.366223	0.224241	no	no	no	no
YJR040W::chr00_13	YJR040W	GEF1	0.0833118	-0.51811	0.539428	0.925625	yes	no	yes	no
YJR049C::chr00_13	YJR049C	UTR1	0.973687	0.135226	0.0521847	0.472276	yes	no	yes	no
YJR050W::chr00_13	YJR050W	ISY1	1.53311	1.53311	0.00339866	0.000470021	yes	yes	yes	yes
YJR052W::chr00_13	YJR052W	RAD7	-1.58156	-1.54895	0.999551	0.999936	no	no	no	no
YJR053W::chr00_13	YJR053W	BFA1	0.0961281	0.480647	0.529571	0.192219	no	yes	no	yes
YJR054W::chr00_13	YJR054W	YJR054W	0.748128	0.430498	0.117508	0.225553	yes	no	yes	no
YJR056C::chr00_13	YJR056C	YJR056C	-0.679719	0.0476879	0.942439	0.552999	no	yes	no	yes
YJR058C::chr00_13	YJR058C	APS2	-0.223988	0.116972	0.756055	0.489126	no	no	no	no
YJR059W::chr00_13	YJR059W	PTK2	-0.146002	0.217295	0.70635	0.39756	no	no	no	no
YJR060W::chr00_13	YJR060W	CBF1	0.146252	0.608285	0.490903	0.121922	no	no	no	no
YJR062C::chr00_13	YJR062C	NTA1	-0.181626	0.558234	0.729629	0.146978	no	no	no	no
YJR069C::chr00_12	YJR069C	HAM1	0.0524295	0.718289	0.56307	0.0777652	no	no	no	no
YJR073C::chr10_4	YJR073C	OPI3	-0.10934	0.0508037	0.681468	0.550143	no	no	no	no
YJR075W::chr10_4	YJR075W	HOC1	0.188448	0.307392	0.458401	0.319754	no	no	no	no
YJR082C::chr10_4	YJR082C	EAF6	-1.74373	0.011162	0.999861	0.58623	no	yes	no	yes
YJR084W::chr00_12	YJR084W	YJR084W	-0.91629	-0.808921	0.978993	0.982898	no	no	no	no
YJR087W::chr00_12	YJR087W	YJR087W	-0.22404	0.34673	0.756087	0.287905	no	no	no	no
YJR094W-A::chr00_12	YJR094W-A	RPL43B	0.441917	0.420811	0.275933	0.232349	no	no	no	no
YJR097W::chr00_12	YJR097W	JJJ3	0.2928	0.0441672	0.37965	0.556222	no	no	no	no
YJR103W::chr10_4	YJR103W	URA8	-0.20391	-0.498942	0.743707	0.919177	no	no	no	no
YJR106W::chr00_12	YJR106W	ECM27	-0.480178	0.0157568	0.882867	0.582078	no	no	no	no
YJR108W::chr10_4	YJR108W	ABM1	0.0121586	-0.095529	0.59355	0.67904	no	no	no	no
YJR111C::chr10_4	YJR111C	YJR111C	-0.368322	-0.220311	0.834718	0.7746	no	no	no	no
YJR113C::chr00_12	YJR113C	RSM7	-0.449894	0.0873815	0.870938	0.516467	no	no	no	no
YJR116W::chr00_12	YJR116W	TDA4	-0.319431	0.156124	0.810128	0.453049	no	no	no	no
YJR117W::chr00_12	YJR117W	STE24	-0.416685	-0.0138597	0.856917	0.608657	no	no	no	no
YJR118C::chr00_12	YJR118C	ILM1	-0.231057	0.442177	0.760325	0.217511	no	no	no	no
YJR121W::chr00_12	YJR121W	ATP2	-0.494221	0.490344	0.888125	0.18614	no	no	no	no
YJR122W::chr00_12	YJR122W	IBA57	-0.448184	0.040217	0.87024	0.559834	no	no	no	no
YJR127C::chr10_4	YJR127C	RSF2	-0.096276	0.106567	0.672391	0.498741	no	no	no	no
YJR129C::chr10_4	YJR129C	YJR129C	-0.624949	-0.147742	0.929164	0.721053	no	no	no	no
YJR130C::chr10_4	YJR130C	STR2	-0.970666	-0.923918	0.983767	0.991438	no	no	no	no
YJR134C::chr00_12	YJR134C	SGM1	-0.201071	-0.146089	0.741935	0.719764	no	no	no	no
YJR135C::chr10_4	YJR135C	MCM22	-0.453978	0.0600166	0.872594	0.541685	no	no	no	no
YJR137C::chr10_4	YJR137C	MET5	-0.433236	-0.399822	0.864028	0.878987	no	no	no	no
YJR144W::chr00_12	YJR144W	MGM101	-0.765512	-0.461704	0.959212	0.905458	no	no	no	no
YJR147W::chr10_4	YJR147W	HMS2	0.181875	-0.0565303	0.463451	0.646048	no	no	no	no
YJR148W::chr00_12	YJR148W	BAT2	-0.109909	-0.0588472	0.68186	0.648042	no	no	no	no
YJR149W::chr10_4	YJR149W	YJR149W	-0.606062	-0.15077	0.924078	0.723405	no	no	no	no
YJR152W::chr10_4	YJR152W	DAL5	0.0054539	-0.214158	0.598576	0.770299	no	no	no	no
YJR153W::chr00_12	YJR153W	PGU1	-0.0657883	0.107302	0.650817	0.498061	no	no	no	no
YJR154W::chr10_4	YJR154W	YJR154W	-0.0345345	0.466656	0.628183	0.201202	no	no	no	no
YKL005C::chr00_12	YKL005C	BYE1	0.323753	0.0862024	0.357071	0.517555	no	no	no	no
YKL006W::chr11_1	YKL006W	RPL14A	0.649883	1.1687	0.159282	0.00687573	no	yes	no	yes
YKL007W::chr11_1	YKL007W	CAP1	0.742915	0.538548	0.119508	0.157718	no	no	no	no
YKL008C::chr11_1	YKL008C	LAC1	-0.199512	0.379838	0.740959	0.262318	no	no	no	no
YKL015W::chr11_1	YKL015W	PUT3	-0.236598	-0.0683075	0.763644	0.656141	no	no	no	no
YKL023W::chr11_1	YKL023W	YKL023W	0.0532233	-0.410096	0.562464	0.88371	no	no	no	no
YKL025C::chr11_1	YKL025C	PAN3	0.256788	-0.340387	0.40644	0.849023	no	no	no	no
YKL029C::chr11_1	YKL029C	MAE1	0.62628	0.402322	0.170615	0.245632	no	no	no	no
YKL030W::chr00_12	YKL030W	YKL030W	0.783326	0.786744	0.104622	0.0571854	no	no	no	no
YKL031W::chr11_1	YKL031W	YKL031W	-0.188733	-0.501267	0.73416	0.919981	no	no	no	no
YKL033W-A::chr00_3	YKL033W-A	YKL033W-A	0.244761	-0.433072	0.415493	0.893795	no	no	no	no
YKL038W::chr11_1	YKL038W	RGT1	-0.0854787	-0.331342	0.664812	0.844063	no	no	no	no
YKL039W::chr11_1	YKL039W	PTM1	1.65697	0.931693	0.00160801	0.0277696	no	no	no	no
YKL043W::chr11_1	YKL043W	PHD1	-0.564242	-0.215865	0.911831	0.771496	no	no	no	no
YKL046C::chr11_1	YKL046C	DCW1	0.040132	-0.263219	0.572426	0.803305	no	no	no	no
YKL047W::chr11_1	YKL047W	YKL047W	0.310227	-0.87191	0.366881	0.9882	no	no	no	no
YKL050C::chr11_1	YKL050C	YKL050C	-0.219678	0.0731649	0.753432	0.529583	no	no	no	no
YKL051W::chr11_1	YKL051W	SFK1	0.170297	-0.193838	0.472361	0.755769	no	no	no	no
YKL053C-A::chr00_17b	YKL053C-A	MDM35	0.598488	-0.460075	0.184604	0.904821	no	no	no	no
YKL055C::chr11_1	YKL055C	OAR1	-0.642787	-0.0641796	0.933724	0.652616	no	no	no	no
YKL061W::chr11_1	YKL061W	BLI1	0.347627	-0.208906	0.339986	0.76659	no	no	no	no
YKL062W::chr11_1	YKL062W	MSN4	1.14358	1.13136	0.0254219	0.00872248	no	no	no	no
YKL063C::chr11_1	YKL063C	YKL063C	0.506147	0.0263294	0.235989	0.572491	no	no	no	no
YKL064W::chr11_1	YKL064W	MNR2	-0.529013	0.17962	0.900419	0.431565	no	no	no	no
YKL065C::chr11_1	YKL065C	YET1	-0.514381	-0.850502	0.895375	0.986585	no	no	no	no
YKL066W::chr11_1	YKL066W	YKL066W	-0.267459	-0.54057	0.781654	0.932672	no	no	no	no
YKL068W::chr11_1	YKL068W	NUP100	0.0051238	-0.288907	0.598823	0.819377	no	no	no	no
YKL070W::chr11_1	YKL070W	YKL070W	0.731959	0.143197	0.12379	0.464933	no	no	no	no
YKL073W::chr11_1	YKL073W	LHS1	0.381602	0.190004	0.316237	0.42213	no	no	no	no
YKL074C::chr11_1	YKL074C	MUD2	0.951559	0.609764	0.0569153	0.12123	no	no	no	no
YKL076C::chr11_1	YKL076C	PSY1	-0.173828	0.622008	0.724613	0.11561	no	no	no	no
YKL077W::chr11_1	YKL077W	YKL077W	0.745086	0.372265	0.118673	0.268067	no	no	no	no
YKL079W::chr11_1	YKL079W	SMY1	-0.201672	0.122376	0.74231	0.484134	no	no	no	no
YKL085W::chr11_1	YKL085W	MDH1	-0.360423	-0.346043	0.830892	0.85207	no	no	no	no
YKL086W::chr11_1	YKL086W	SRX1	-0.0984925	0.377679	0.673939	0.263951	no	no	no	no
YKL087C::chr11_1	YKL087C	CYT2	-0.75438	-0.997918	0.95729	0.994698	no	no	no	no
YKL090W::chr11_1	YKL090W	CUE2	-0.565971	-0.15882	0.912365	0.72961	no	no	no	no
YKL091C::chr11_1	YKL091C	YKL091C	0.25776	0.12809	0.405711	0.478859	no	no	no	no
YKL093W::chr11_1	YKL093W	MBR1	-0.208098	0.268727	0.746309	0.352412	no	no	no	no
YKL096W-A::chr00_14	YKL096W-A	CWP2	-0.287268	0.677936	0.792786	0.09229	no	no	no	no
YKL096W::chr11_2	YKL096W	CWP1	0.935213	0.333791	0.0606217	0.298215	yes	no	yes	no
YKL097C::chr11_2	YKL097C	YKL097C	0.22554	-0.118348	0.430052	0.697728	no	no	no	no
YKL100C::chr11_2	YKL100C	YKL100C	0.507119	0.18949	0.23541	0.422596	yes	no	yes	no
YKL102C::chr11_2	YKL102C	YKL102C	0.656497	0.16199	0.156196	0.44767	yes	no	yes	no
YKL105C::chr11_2	YKL105C	YKL105C	-0.0712018	-0.0530407	0.654686	0.643037	no	no	no	no
YKL106W::chr11_2	YKL106W	AAT1	0.875507	-0.203963	0.0757812	0.76307	yes	no	yes	no
YKL107W::chr11_2	YKL107W	YKL107W	0.227721	-0.0539522	0.428395	0.643824	no	no	no	no
YKL110C::chr11_2	YKL110C	KTI12	0.00261885	0.774453	0.600696	0.0605258	no	no	no	no
YKL113C::chr11_2	YKL113C	RAD27	-0.0618691	0.702751	0.648006	0.0831376	no	no	no	no
YKL117W::chr11_2	YKL117W	SBA1	-0.242314	0.954578	0.76704	0.0245541	no	yes	no	yes
YKL126W::chr11_2	YKL126W	YPK1	0.576457	1.07945	0.196186	0.0120066	no	no	no	no
YKL127W::chr11_2	YKL127W	PGM1	-0.0564738	0.188601	0.644123	0.423403	no	no	no	no
YKL131W::chr11_2	YKL131W	YKL131W	-0.0471899	0.0642298	0.637407	0.537811	no	no	no	no
YKL133C::chr11_2	YKL133C	YKL133C	0.460633	0.217095	0.26396	0.397739	no	no	no	no
YKL134C::chr11_2	YKL134C	OCT1	0.298255	0.369616	0.375639	0.270092	no	yes	no	yes
YKL135C::chr11_2	YKL135C	APL2	0.0902175	1.38397	0.53412	0.00152636	no	yes	no	yes
YKL137W::chr11_2	YKL137W	CMC1	0.064442	-0.35977	0.553896	0.859294	no	no	no	no
YKL138C::chr11_2	YKL138C	MRPL31	-0.44061	-0.0258722	0.867118	0.619303	no	no	no	no
YKL140W::chr11_2	YKL140W	TGL1	0.911096	0.17962	0.0664317	0.431565	no	no	no	no
YKL142W::chr11_2	YKL142W	MRP8	0.170861	0.16156	0.471926	0.448064	no	no	no	no
YKL147C::chr11_2	YKL147C	YKL147C	-0.156472	-0.0011933	0.713288	0.597344	no	no	no	no
YKL156W::chr11_2	YKL156W	RPS27A	0.22033	0.159498	0.434016	0.449954	no	no	no	no
YKL157W::chr11_2	YKL157W	APE2	1.13566	0.0256686	0.0263442	0.573092	no	no	no	no
YKL158W::chr11_2	YKL157W	APE2	0.184219	0.124338	0.46165	0.482323	no	no	no	no
YKL162C-A::chr00_3	YKL162C-A	YKL162C-A	1.95201	0.856285	0.000218028	0.0409342	no	no	yes	no
YKL163W::chr11_2	YKL163W	PIR3	-0.241501	0.234255	0.766559	0.382486	no	no	no	no
YKL164C::chr11_2	YKL164C	PIR1	-0.732186	-0.759676	0.95324	0.977442	no	no	no	no
YKL168C::chr11_2	YKL168C	KKQ8	-0.426738	-0.319369	0.861266	0.837334	no	no	no	no
YKL171W::chr11_2	YKL171W	NNK1	-0.268786	-0.276894	0.782411	0.811966	no	no	no	no
YKL174C::chr11_2	YKL174C	TPO5	-0.579509	-0.479503	0.916462	0.912216	no	no	no	no
YKL175W::chr11_2	YKL175W	ZRT3	-0.276754	-0.00637975	0.78692	0.601987	no	no	no	no
YKL176C::chr11_2	YKL176C	LST4	1.14505	1.49394	0.0252536	0.000647377	no	yes	no	yes
YKL183W::chr11_2	YKL183W	LOT5	0.504834	1.18686	0.236773	0.00610936	no	no	no	no
YKL188C::chr11_2	YKL188C	PXA2	0.247995	0.128322	0.413054	0.478645	no	no	no	no
YKL198C::chr11_3	YKL198C	PTK1	1.09271	0.996984	0.0318444	0.0194195	no	no	no	no
YKL199C::chr11_3	YKL198C	PTK1	0.384157	0.271921	0.31448	0.349668	no	no	no	no
YKL201C::chr00_14	YKL201C	MNN4	0.457171	0.409171	0.266154	0.240665	no	no	no	no
YKL202W::chr00_14	YKL202W	YKL202W	0.931453	0.901319	0.0615004	0.0325718	no	no	no	no
YKL205W::chr11_3	YKL205W	LOS1	0.727939	0.820661	0.125388	0.0487173	no	no	no	no
YKL207W::chr11_3	YKL207W	EMC3	0.0313679	-0.0397383	0.57907	0.631478	no	no	no	no
YKL208W::chr11_3	YKL208W	CBT1	0.121484	-0.61459	0.510022	0.952289	no	no	no	no
YKL215C::chr00_14	YKL215C	OXP1	-0.033102	0.15972	0.627135	0.44975	no	no	no	no
YKL217W::chr11_3	YKL217W	JEN1	-0.967964	-0.390236	0.983553	0.87446	no	no	no	no
YKL220C::chr00_14	YKL220C	FRE2	0.429976	0.116907	0.283709	0.489185	no	no	no	no
YKR006C::chr11_3	YKR006C	MRPL13	-0.153454	0.503944	0.711296	0.177817	no	no	no	no
YKR010C::chr00_14	YKR010C	TOF2	-0.14251	-0.0683075	0.704019	0.656141	no	no	no	no
YKR011C::chr11_3	YKR011C	YKR011C	0.698793	0.367792	0.137403	0.271492	no	no	no	no
YKR013W::chr11_3	YKR013W	PRY2	0.426713	0.53033	0.285852	0.162351	no	no	no	no
YKR015C::chr11_3	YKR015C	YKR015C	0.583315	0.268727	0.192534	0.352412	no	no	no	no
YKR017C::chr11_3	YKR017C	YKR017C	0.310227	0.507119	0.366881	0.175908	no	yes	no	yes
YKR018C::chr11_3	YKR018C	YKR018C	0.605683	1.25362	0.180916	0.00390229	no	no	no	no
YKR020W::chr11_3	YKR020W	VPS51	-0.140743	-0.189614	0.702837	0.752688	no	no	no	no
YKR023W::chr00_14	YKR023W	YKR023W	-0.0210995	-0.0963219	0.618311	0.679697	no	no	no	no
YKR024C::chr11_3	YKR024C	DBP7	0.280349	0.280349	0.388855	0.342467	yes	yes	yes	yes
YKR026C::chr11_3	YKR026C	GCN3	0.0967013	0.193787	0.52913	0.418703	no	no	no	no
YKR028W::chr00_14	YKR028W	SAP190	0.350869	-0.57235	0.337691	0.941748	no	no	no	no
YKR033C::chr11_3	YKR033C	YKR033C	0.506147	0.215485	0.235989	0.399177	no	no	no	no
YKR035W-A::chr00_3	YKR035W-A	DID2	1.03864	1.06561	0.0400826	0.0130451	no	yes	no	yes
YKR039W::chr00_14	YKR039W	GAP1	0.583741	-0.297789	0.192309	0.824737	yes	no	yes	no
YKR041W::chr00_14	YKR041W	YKR041W	0.310722	-0.390236	0.366521	0.87446	yes	no	yes	no
YKR043C::chr11_3	YKR043C	SHB17	-0.292987	0.241377	0.795936	0.376207	no	no	no	no
YKR046C::chr00_14	YKR046C	PET10	0.299697	0.462207	0.37458	0.20411	no	no	no	no
YKR048C::chr11_3	YKR048C	NAP1	0.812612	0.58804	0.0947055	0.13167	no	no	no	no
YKR049C::chr11_3	YKR049C	FMP46	1.45368	0.828599	0.00534158	0.0468878	no	no	no	no
YKR050W::chr11_3	YKR050W	TRK2	0.583741	-0.0176814	0.192309	0.612053	yes	no	yes	no
YKR051W::chr11_3	YKR051W	YKR051W	1.24932	1.06294	0.0154862	0.0132545	yes	no	yes	no
YKR052C::chr11_3	YKR052C	MRS4	0.480152	0.465125	0.251761	0.2022	no	no	no	no
YKR053C::chr00_14	YKR053C	YSR3	-0.173972	0.443592	0.724707	0.216548	no	no	no	no
YKR055W::chr11_3	YKR055W	RHO4	0.673702	0.47918	0.148357	0.193149	no	no	no	no
YKR057W::chr11_3	YKR057W	RPS21A	-0.0532799	0.349545	0.641818	0.285684	no	no	no	no
YKR065C::chr11_3	YKR065C	PAM17	0.671826	0.302061	0.149198	0.324182	no	no	no	no
YKR066C::chr00_3	YKR066C	CCP1	-0.200279	-0.50271	0.741439	0.920477	no	no	no	no
YKR067W::chr00_3	YKR067W	GPT2	0.0840827	-0.134397	0.538836	0.710572	no	no	no	no
YKR070W::chr00_3	YKR070W	YKR070W	-0.0794378	0.0084497	0.660541	0.588676	no	no	no	no
YKR072C::chr00_3	YKR072C	SIS2	0.733558	1.11808	0.123159	0.00947759	no	yes	no	yes
YKR074W::chr00_3	YKR074W	AIM29	1.18306	0.937498	0.0212188	0.0269224	no	no	no	no
YKR076W::chr00_3	YKR076W	ECM4	1.12848	0.168732	0.0272041	0.4415	no	no	no	no
YKR077W::chr00_3	YKR077W	MSA2	0.216641	0.154085	0.436827	0.454921	no	no	no	no
YKR080W::chr00_3	YKR080W	MTD1	0.170616	0.0752834	0.472115	0.52763	no	no	no	no
YKR082W::chr00_3	YKR082W	NUP133	0.252391	0.915925	0.409745	0.0301832	no	no	no	no
YKR087C::chr00_4	YKR087C	OMA1	-0.0807071	-0.167086	0.66144	0.735909	no	no	no	no
YKR089C::chr00_4	YKR089C	TGL4	-0.0265851	-0.0874163	0.622351	0.672282	no	no	no	no
YKR090W::chr00_4	YKR090W	PXL1	-0.235319	0.0248019	0.76288	0.573879	no	no	no	no
YKR092C::chr00_4	YKR092C	SRP40	1.01876	0.89674	0.0435179	0.033352	no	no	no	no
YKR094C::chr00_15	YKR094C	RPL40B	-0.188057	0.240445	0.733731	0.377027	no	no	no	no
YKR095W::chr00_15	YKR095W	MLP1	0.37017	0.0360292	0.324151	0.563658	no	no	no	no
YKR097W::chr00_4	YKR097W	PCK1	0.533115	0.533115	0.22022	0.160771	yes	yes	yes	yes
YKR099W::chr00_4	YKR099W	BAS1	0.556281	0.39573	0.20717	0.250464	no	no	no	no
YKR101W::chr00_4	YKR101W	SIR1	0.433269	0.54687	0.281554	0.153117	no	no	no	no
YKR102W::chr00_15	YKR102W	FLO10	0.320844	0.424461	0.359173	0.229775	no	no	no	no
YKR103W::chr00_4	YKR103W	NFT1	-0.180116	-0.230059	0.728661	0.781322	no	no	no	no
YKR104W::chr00_4	YKR104W	YKR104W	-0.647203	-0.081728	0.934817	0.667509	no	no	no	no
YKR106W::chr00_17b	YKR106W	GEX2	0.0920594	-0.0220138	0.532703	0.615893	no	no	no	no
YLL001W::chr12_1	YLL001W	DNM1	0.654398	0.176805	0.157171	0.43413	no	no	no	no
YLL005C::chr12_1	YLL005C	SPO75	0.78843	-0.1527	0.102841	0.724899	no	no	no	no
YLL006W::chr12_1	YLL006W	MMM1	0.451483	1.55228	0.26978	0.000400747	no	no	no	yes
YLL007C::chr00_10	YLL007C	YLL007C	0.283755	1.86531	0.38633	2.27667e-05	no	yes	no	yes
YLL009C::chr12_1	YLL009C	COX17	-0.0242461	-0.313026	0.62063	0.833694	no	no	no	no
YLL010C::chr12_1	YLL010C	PSR1	0.318189	-0.42785	0.361096	0.89156	no	no	no	no
YLL013C::chr12_1	YLL013C	PUF3	0.829496	0.335415	0.0893132	0.296912	no	no	no	no
YLL016W::chr12_1	YLL016W	SDC25	0.647567	0.448751	0.160371	0.213058	no	no	no	no
YLL017W::chr12_1	YLL017W	YLL017W	0.999452	0.54551	0.0470762	0.153862	no	no	no	no
YLL021W::chr12_1	YLL021W	SPA2	0.0054539	-0.321074	0.598576	0.838304	no	no	no	no
YLL024C::chr12_1	YLL024C	SSA2	0.0379987	-0.0545017	0.574045	0.644298	no	no	no	no
YLL025W::chr12_1	YLL025W	PAU17	-0.678443	-0.179953	0.942154	0.745563	no	no	no	no
YLL026W::chr12_1	YLL026W	HSP104	-0.780375	-0.0683075	0.961667	0.656141	no	no	no	no
YLL028W::chr12_1	YLL028W	TPO1	0.208265	-0.0801816	0.44322	0.666206	no	no	no	no
YLL029W::chr12_1	YLL029W	FRA1	-1.23512	-0.250146	0.99598	0.794803	no	no	no	no
YLL032C::chr12_1	YLL032C	YLL032C	-0.0607434	-0.000908214	0.647197	0.597089	no	no	no	no
YLL033W::chr12_1	YLL033W	IRC19	-0.341849	0.550014	0.821671	0.151401	no	no	no	no
YLL038C::chr12_1	YLL038C	ENT4	-0.753975	-0.496581	0.957219	0.918354	no	no	no	no
YLL039C::chr12_1	YLL039C	UBI4	-0.0666081	-0.0383702	0.651404	0.630283	no	no	no	no
YLL044W::chr00_8	YLL044W	YLL044W	-0.863086	-0.620849	0.973223	0.953712	no	no	no	no
YLL045C::chr12_1	YLL045C	RPL8B	1.43576	0.0572234	0.0058976	0.544252	no	no	no	no
YLL047W::chr12_1	YLL047W	YLL047W	0.0867852	-0.0235196	0.536759	0.617225	no	no	no	no
YLL048C::chr00_8	YLL048C	YBT1	0.78843	-0.247857	0.102841	0.793292	no	no	no	no
YLL049W::chr00_8	YLL049W	LDB18	0.395865	-0.054761	0.306481	0.644522	no	no	no	no
YLL052C::chr12_1	YLL052C	AQY2	0.45368	0.200181	0.268377	0.412926	yes	no	yes	no
YLL053C::chr12_1	YLL053C	YLL053C	1.44881	0.819218	0.00548773	0.049056	no	no	no	no
YLL054C::chr12_1	YLL054C	YLL054C	-0.437986	-0.183171	0.866024	0.747948	no	no	no	no
YLL057C::chr12_1	YLL057C	JLP1	-0.158407	-0.120235	0.714561	0.699252	no	no	no	no
YLL059C::chr00_8	YLL059C	YLL059C	-0.0903692	0.442654	0.668253	0.217185	no	no	no	no
YLL060C::chr12_1	YLL060C	GTT2	0.0613626	-0.143495	0.55625	0.717737	no	no	no	no
YLL061W::chr12_1	YLL061W	MMP1	-0.501145	-0.0812466	0.890654	0.667104	no	no	no	no
YLL062C::chr12_1	YLL062C	MHT1	0.435758	-0.841537	0.27993	0.985854	no	no	no	no
YLL063C::chr12_1	YLL063C	AYT1	-0.252912	-0.209584	0.773265	0.767071	no	no	no	no
YLR003C::chr12_1	YLR003C	CMS1	1.29417	0.658316	0.0124091	0.100038	no	no	no	no
YLR004C::chr12_1	YLR004C	THI73	1.36962	-0.0683075	0.00841921	0.656141	yes	no	yes	no
YLR006C::chr12_1	YLR006C	SSK1	-0.356584	-0.153555	0.829011	0.725559	no	no	no	no
YLR012C::chr12_1	YLR012C	YLR012C	0.240362	0.132225	0.418815	0.475043	no	no	no	no
YLR013W::chr12_1	YLR013W	GAT3	0.435758	0.379151	0.27993	0.262837	no	no	no	no
YLR014C::chr12_1	YLR014C	PPR1	-0.571128	-0.646351	0.913943	0.959162	no	no	no	no
YLR015W::chr12_1	YLR015W	BRE2	0.828076	0.891051	0.089758	0.0343427	no	no	no	no
YLR016C::chr12_1	YLR016C	PML1	-0.634334	-0.260953	0.931592	0.801846	no	no	no	no
YLR017W::chr12_1	YLR017W	MEU1	0.312324	0.166713	0.365354	0.443346	no	no	no	no
YLR018C::chr12_1	YLR018C	POM34	0.721876	1.00208	0.127825	0.0188686	no	no	no	no
YLR021W::chr12_1	YLR021W	IRC25	0.679956	0.426457	0.145573	0.228374	yes	no	yes	no
YLR023C::chr12_1	YLR023C	IZH3	-0.605867	-0.319029	0.924024	0.83714	no	no	no	no
YLR028C::chr12_1	YLR028C	ADE16	0.769182	0.516655	0.109671	0.170254	no	no	no	no
YLR030W::chr00_8	YLR030W	YLR030W	0.418504	0.498393	0.291277	0.181185	no	no	no	no
YLR031W::chr00_8	YLR031W	YLR031W	-0.0886628	-0.0282301	0.667054	0.621382	no	no	no	no
YLR032W::chr00_8	YLR032W	RAD5	-0.0144763	0.309704	0.613415	0.317842	no	no	no	no
YLR034C::chr00_8	YLR034C	SMF3	-0.440667	-0.0896811	0.867141	0.674174	no	no	no	no
YLR035C::chr00_8	YLR035C	MLH2	0.205753	0.131991	0.44514	0.47526	no	no	no	no
YLR036C::chr00_8	YLR036C	YLR036C	0.546789	0.194727	0.212461	0.417853	no	no	no	no
YLR037C::chr00_8	YLR037C	PAU23	-0.196025	0.0988025	0.73877	0.505916	no	no	no	no
YLR038C::chr00_8	YLR038C	COX12	-1.28998	-1.11236	0.997079	0.997603	no	no	no	no
YLR039C::chr00_8	YLR039C	RIC1	0.086863	-0.340387	0.536699	0.849023	no	no	no	no
YLR040C::chr00_8	YLR040C	YLR040C	0.182608	0.00611734	0.462888	0.590776	no	no	no	no
YLR041W::chr00_8	YLR041W	YLR041W	-0.356279	0.511052	0.828861	0.173562	no	no	no	no
YLR042C::chr12_2	YLR042C	YLR042C	-0.00122189	0.245353	0.603563	0.372716	no	no	no	no
YLR043C::chr12_2	YLR043C	TRX1	-0.097674	0.241021	0.673368	0.376521	no	no	no	no
YLR044C::chr12_2	YLR044C	PDC1	-0.207454	0.531213	0.74591	0.161849	no	no	no	no
YLR046C::chr12_2	YLR046C	YLR046C	1.15517	0.907445	0.024121	0.0315517	no	no	no	no
YLR047C::chr12_2	YLR047C	FRE8	0.445891	0.10446	0.273368	0.500687	no	no	no	no
YLR049C::chr12_2	YLR049C	YLR049C	0.480647	-0.0683075	0.251456	0.656141	yes	no	yes	no
YLR050C::chr00_8	YLR050C	YLR050C	0.921185	0.516655	0.0639508	0.170254	no	no	no	no
YLR052W::chr00_8	YLR052W	IES3	0.399948	1.25076	0.303714	0.00397973	no	no	no	no
YLR055C::chr12_2	YLR055C	SPT8	-0.84633	-1.20223	0.971152	0.998772	no	no	no	no
YLR058C::chr12_2	YLR058C	SHM2	0.862291	0.215485	0.0794974	0.399177	no	no	no	no
YLR063W::chr12_2	YLR063W	YLR063W	0.426199	0.384205	0.28619	0.259033	yes	no	yes	no
YLR067C::chr12_2	YLR067C	PET309	0.55865	-0.189614	0.205862	0.752688	yes	no	yes	no
YLR069C::chr12_2	YLR069C	MEF1	0.523763	0.235723	0.225619	0.381189	no	no	no	no
YLR070C::chr12_2	YLR070C	XYL2	0.707457	-0.0065313	0.133752	0.602122	no	no	no	no
YLR072W::chr12_2	YLR072W	YLR072W	0.330753	0.310204	0.35203	0.317429	no	no	no	no
YLR073C::chr12_2	YLR073C	RFU1	0.845013	0.156985	0.084562	0.452259	no	no	no	no
YLR077W::chr12_2	YLR077W	FMP25	0.410287	0.0343782	0.296754	0.565164	no	no	no	no
YLR079W::chr12_2	YLR079W	SIC1	0.761077	0.875507	0.112643	0.0371732	no	yes	no	yes
YLR082C::chr12_2	YLR082C	SRL2	0.948771	0.143197	0.0575345	0.464933	no	no	no	no
YLR084C::chr12_2	YLR084C	RAX2	1.23355	0.485291	0.0167136	0.189293	yes	no	yes	no
YLR085C::chr12_2	YLR085C	ARP6	1.25888	1.57125	0.0147804	0.00034161	no	yes	no	yes
YLR089C::chr12_2	YLR089C	ALT1	0.868718	0.131991	0.0776735	0.47526	no	no	no	no
YLR092W::chr12_2	YLR092W	SUL2	0.398185	0.2118	0.304907	0.402477	yes	no	yes	no
YLR093C::chr12_2	YLR093C	NYV1	0.51072	1.02954	0.233273	0.0161246	no	yes	no	yes
YLR094C::chr12_2	YLR094C	GIS3	0.610256	0.0655482	0.178596	0.536598	no	no	no	no
YLR098C::chr12_2	YLR098C	CHA4	0.70304	0.587044	0.135605	0.132163	yes	no	yes	no
YLR099C::chr12_2	YLR099C	ICT1	0.0259573	-0.544746	0.58316	0.933924	no	no	no	no
YLR107W::chr12_2	YLR107W	REX3	0.456592	-0.0837375	0.266523	0.669198	no	no	no	no
YLR110C::chr00_15	YLR110C	CCW12	0.806974	0.780787	0.0965587	0.0587858	no	no	no	no
YLR111W::chr12_2	YLR111W	YLR111W	1.22363	0.823316	0.0175277	0.0480991	no	no	no	no
YLR118C::chr12_2	YLR118C	YLR118C	0.513761	0.253621	0.231476	0.365491	no	no	no	no
YLR120C::chr12_2	YLR120C	YPS1	0.63265	0.379151	0.167506	0.262837	yes	no	yes	no
YLR121C::chr12_2	YLR121C	YPS3	2.23355	0.417119	2.43186e-05	0.234969	yes	no	yes	no
YLR122C::chr12_2	YLR122C	YLR122C	1.41151	0.644411	0.00673133	0.105811	no	no	no	no
YLR123C::chr12_2	YLR123C	YLR123C	0.0152662	0.069196	0.591216	0.533239	no	no	no	no
YLR125W::chr12_2	YLR125W	YLR125W	0.155171	-0.185664	0.484021	0.749788	no	no	no	no
YLR126C::chr12_3	YLR126C	YLR126C	0.511707	0.0960793	0.232688	0.508432	no	no	no	no
YLR130C::chr12_3	YLR130C	ZRT2	0.896732	0.435735	0.0700917	0.221926	no	no	no	no
YLR133W::chr12_3	YLR133W	CKI1	1.71444	0.113022	0.00111589	0.492775	yes	no	yes	no
YLR134W::chr12_3	YLR134W	PDC5	0.55865	0.241021	0.205862	0.376521	yes	no	yes	no
YLR135W::chr12_3	YLR135W	SLX4	0.328149	-0.111376	0.353902	0.69207	no	no	no	no
YLR136C::chr12_3	YLR136C	TIS11	0.398185	0.144686	0.304907	0.463562	yes	no	yes	no
YLR137W::chr12_3	YLR137W	RKM5	0.770154	0.069196	0.109319	0.533239	yes	no	yes	no
YLR138W::chr12_3	YLR138W	NHA1	1.29783	0.40874	0.0121833	0.240976	no	no	no	no
YLR139C::chr12_3	YLR139C	SLS1	0.590644	0.657185	0.188678	0.100499	no	no	no	no
YLR142W::chr12_3	YLR142W	PUT1	0.608595	0.394036	0.179436	0.251714	no	no	no	no
YLR149C::chr12_3	YLR149C	YLR149C	0.581141	0.270217	0.193687	0.351131	no	no	no	no
YLR151C::chr12_3	YLR151C	PCD1	0.676766	0.199173	0.146988	0.413836	no	no	no	no
YLR152C::chr12_3	YLR152C	YLR152C	-0.179901	-0.506429	0.728524	0.921744	no	no	no	no
YLR164W::chr12_3	YLR164W	SHH4	0.366217	-0.31342	0.326905	0.833922	no	no	no	no
YLR165C::chr12_3	YLR165C	PUS5	0.63265	0.315021	0.167506	0.313462	yes	no	yes	no
YLR170C::chr12_3	YLR170C	APS1	0.280349	0.238354	0.388855	0.378869	yes	no	yes	no
YLR171W::chr12_3	YLR171W	YLR171W	0.429976	-0.365693	0.283709	0.862336	no	no	no	no
YLR177W::chr12_3	YLR177W	YLR177W	-0.397067	-0.558446	0.848168	0.937903	no	no	no	no
YLR178C::chr12_3	YLR178C	TFS1	0.0873579	0.0792497	0.536319	0.523972	no	no	no	no
YLR179C::chr12_3	YLR179C	YLR179C	1.30952	0.581946	0.0114855	0.134706	no	no	no	no
YLR180W::chr12_3	YLR180W	SAM1	0.964383	0.542418	0.0541343	0.155567	no	no	no	no
YLR181C::chr12_3	YLR181C	VTA1	0.446606	0.0854978	0.272909	0.518206	no	no	no	no
YLR182W::chr12_3	YLR182W	SWI6	0.474752	0.575549	0.255106	0.137946	no	no	no	no
YLR183C::chr12_3	YLR183C	TOS4	0.815516	0.276222	0.0937615	0.345987	no	no	no	no
YLR185W::chr12_3	YLR185W	RPL37A	0.0335535	0.485544	0.577415	0.189134	no	no	no	no
YLR187W::chr12_3	YLR187W	SKG3	0.376864	0.0174224	0.319507	0.580571	no	no	no	no
YLR188W::chr12_3	YLR188W	MDL1	-0.242314	-0.65327	0.76704	0.960547	no	no	no	no
YLR193C::chr12_3	YLR193C	UPS1	1.24949	0.10857	0.0154739	0.496889	no	no	no	no
YLR199C::chr12_3	YLR199C	PBA1	0.791902	0.49112	0.101643	0.185659	no	no	no	no
YLR201C::chr12_3	YLR201C	COQ9	0.0834019	-0.105128	0.539359	0.68696	no	no	no	no
YLR203C::chr12_3	YLR203C	MSS51	0.664396	-0.0644345	0.152564	0.652834	no	no	no	no
YLR204W::chr12_3	YLR204W	QRI5	0.983246	0.372265	0.0502404	0.268067	no	no	no	no
YLR205C::chr12_3	YLR205C	HMX1	1.02712	0.944517	0.0420454	0.0259271	no	no	no	no
YLR206W::chr12_3	YLR206W	ENT2	0.435758	0.643567	0.27993	0.106168	no	no	no	no
YLR207W::chr12_3	YLR207W	HRD3	1.08582	0.0805559	0.0328096	0.522767	no	no	no	no
YLR209C::chr12_3	YLR209C	PNP1	0.875507	0.174549	0.0757812	0.436187	yes	no	yes	no
YLR210W::chr12_3	YLR210W	CLB4	0.308846	-0.210327	0.367888	0.767596	no	no	no	no
YLR211C::chr12_3	YLR211C	YLR211C	0.199222	-0.0176814	0.450139	0.612053	no	no	no	no
YLR213C::chr12_3	YLR213C	CRR1	0.875507	0.326552	0.0757812	0.304055	yes	no	yes	no
YLR214W::chr12_3	YLR214W	FRE1	1.08331	0.48189	0.0331662	0.191434	yes	no	yes	no
YLR219W::chr12_3	YLR219W	MSC3	1.27104	0.260018	0.0139225	0.359932	no	no	no	no
YLR220W::chr12_3	YLR220W	CCC1	1.01025	-0.324321	0.0450575	0.84014	no	no	no	no
YLR224W::chr12_3	YLR224W	YLR224W	0.462725	-0.100016	0.262638	0.682753	no	no	no	no
YLR225C::chr12_3	YLR225C	YLR225C	0.310722	-0.183785	0.366521	0.748401	yes	no	yes	no
YLR228C::chr12_4	YLR228C	ECM22	-1.37796	-1.0604	0.998288	0.996535	no	no	no	no
YLR232W::chr12_4	YLR232W	YLR232W	-0.0448677	-0.227005	0.63572	0.779229	no	no	no	no
YLR233C::chr12_4	YLR233C	EST1	0.0776477	0.270899	0.543777	0.350546	no	no	no	no
YLR236C::chr12_4	YLR236C	YLR236C	0.332665	0.668658	0.350658	0.0958968	no	no	no	no
YLR237W::chr00_11	YLR237W	THI7	0.399232	0.117559	0.304198	0.488583	no	no	no	no
YLR238W::chr12_4	YLR238W	FAR10	0.233129	0.354384	0.424291	0.281886	no	no	no	no
YLR239C::chr12_4	YLR239C	LIP2	-0.650083	-0.903208	0.935522	0.990256	no	no	no	no
YLR241W::chr12_4	YLR241W	YLR241W	-0.006373	0.209848	0.6074	0.404228	no	no	no	no
YLR246W::chr00_11	YLR246W	ERF2	-0.762788	0.402998	0.958748	0.245139	no	no	no	no
YLR247C::chr12_4	YLR247C	IRC20	0.43955	-0.101991	0.277466	0.684381	no	no	no	no
YLR248W::chr12_4	YLR248W	RCK2	0.0936522	0.240137	0.531477	0.377298	no	no	no	no
YLR253W::chr12_4	YLR253W	YLR253W	0.567548	0.154085	0.200992	0.454921	no	no	no	no
YLR254C::chr12_4	YLR254C	NDL1	-0.346295	0.38541	0.823906	0.258129	no	no	no	no
YLR255C::chr12_4	YLR255C	YLR255C	-0.25188	-0.743345	0.772663	0.975336	no	no	no	no
YLR258W::chr12_4	YLR258W	GSY2	0.520455	0.424733	0.227547	0.229584	no	no	no	no
YLR260W::chr12_4	YLR260W	LCB5	-0.198638	1.0434	0.740411	0.0148743	no	no	no	no
YLR261C::chr12_4	YLR261C	VPS63	0.850796	0.931693	0.0828408	0.0277696	no	no	no	no
YLR262C-A::chr00_4	YLR262C-A	TMA7	-0.191583	-0.88068	0.735967	0.988811	no	no	no	no
YLR263W::chr12_4	YLR263W	RED1	0.227902	0.17962	0.428258	0.431565	no	no	no	no
YLR264W::chr12_4	YLR264W	RPS28B	0.63885	1.97609	0.164516	7.319e-06	no	no	no	yes
YLR265C::chr12_4	YLR265C	NEJ1	-0.0818944	-0.175223	0.662281	0.742035	no	no	no	no
YLR266C::chr12_4	YLR266C	PDR8	-0.123967	0.533431	0.691502	0.160593	no	no	no	no
YLR267W::chr12_4	YLR267W	BOP2	0.158224	0.239121	0.481666	0.378193	no	no	no	no
YLR268W::chr12_4	YLR268W	SEC22	0.591877	0.40974	0.188034	0.240254	no	no	no	no
YLR269C::chr12_4	YLR269C	YLR269C	0.0676599	0.223155	0.551433	0.392332	no	no	no	no
YLR270W::chr12_4	YLR270W	DCS1	0.218571	0.872314	0.435356	0.0377776	no	no	no	no
YLR271W::chr12_4	YLR271W	YLR271W	0.990172	0.461584	0.048868	0.20452	no	no	no	no
YLR273C::chr12_4	YLR273C	PIG1	0.864803	0.597273	0.0787809	0.127159	no	no	no	no
YLR278C::chr12_4	YLR278C	YLR278C	0.599878	1.07853	0.183888	0.0120728	no	no	no	no
YLR279W::chr12_4	YLR279W	YLR279W	-0.277748	0.131001	0.787479	0.476173	no	no	no	no
YLR280C::chr12_4	YLR280C	YLR280C	-0.390017	-0.338955	0.844938	0.848245	no	no	no	no
YLR282C::chr12_4	YLR282C	YLR282C	0.540095	0.0121824	0.216239	0.585308	no	no	no	no
YLR283W::chr12_4	YLR283W	YLR283W	-0.283174	-0.11243	0.790513	0.692928	no	no	no	no
YLR284C::chr12_4	YLR284C	ECI1	-0.507658	-1.36787	0.892996	0.999678	no	no	no	no
YLR286C::chr00_12	YLR286C	CTS1	0.0109302	0.054674	0.594472	0.546593	no	no	no	no
YLR287C-A::chr12_4	YLR287C-A	RPS30A	1.97369	1.32164	0.000185997	0.00241634	yes	no	yes	no
YLR288C::chr12_4	YLR288C	MEC3	0.22033	-0.207284	0.434016	0.765438	no	no	no	no
YLR289W::chr12_4	YLR289W	GUF1	-0.136463	0.378208	0.699963	0.26355	no	no	no	no
YLR290C::chr12_4	YLR290C	YLR290C	0.940867	-2.94278	0.0593188	1	no	no	no	no
YLR292C::chr12_4	YLR292C	SEC72	0.333796	1.58377	0.349847	0.000307142	no	no	no	yes
YLR295C::chr12_4	YLR295C	ATP14	1.0133	0.531605	0.0445003	0.161626	no	no	no	no
YLR296W::chr12_4	YLR296W	YLR296W	-0.141852	-0.42563	0.703579	0.8906	no	no	no	no
YLR297W::chr12_4	YLR297W	YLR297W	-0.272638	-0.7882	0.784598	0.980757	no	no	no	no
YLR300W::chr12_4	YLR300W	EXG1	-0.177825	-0.11485	0.72719	0.694895	no	no	no	no
YLR303W::chr12_4	YLR303W	MET17	0.0572465	-0.205811	0.559395	0.764389	no	no	no	no
YLR304C::chr12_4	YLR304C	ACO1	0.121484	0.70304	0.510022	0.0830354	no	yes	no	yes
YLR306W::chr12_4	YLR306W	UBC12	0.43955	0.305667	0.277466	0.321184	no	no	no	no
YLR309C::chr12_4	YLR309C	IMH1	-0.0151564	-0.216153	0.613918	0.771698	no	no	no	no
YLR311C::chr12_4	YLR311C	YLR311C	-0.639624	-0.775111	0.932933	0.979291	no	no	no	no
YLR312W-A::chr12_4	YLR312W-A	MRPL15	-0.422769	-0.103896	0.85956	0.685949	no	no	no	no
YLR313C::chr12_4	YLR313C	SPH1	0.0982573	0.172091	0.527932	0.438431	no	no	no	no
YLR315W::chr12_4	YLR315W	NKP2	1.15202	0.60307	0.0244684	0.124383	yes	no	yes	no
YLR318W::chr12_4	YLR318W	EST2	-0.386299	0.110529	0.843217	0.495079	no	no	no	no
YLR322W::chr12_4	YLR322W	VPS65	0.398185	0.398185	0.304907	0.248659	yes	yes	yes	yes
YLR324W::chr12_5	YLR324W	PEX30	1.47323	0.784135	0.00478859	0.057882	no	no	no	no
YLR325C::chr12_5	YLR325C	RPL38	-0.26324	0.315836	0.77924	0.312793	no	no	no	no
YLR326W::chr12_5	YLR326W	YLR326W	-0.0411446	1.07217	0.633011	0.0125431	no	no	no	no
YLR327C::chr12_5	YLR327C	TMA10	0.19734	0.128585	0.45158	0.478403	no	no	no	no
YLR329W::chr12_5	YLR329W	REC102	0.0613626	-0.31342	0.55625	0.833922	no	no	no	no
YLR331C::chr12_5	YLR331C	JIP3	1.09933	0.168732	0.0309389	0.4415	no	no	no	no
YLR332W::chr12_5	YLR332W	MID2	0.255186	-0.307094	0.407644	0.830243	no	no	no	no
YLR335W::chr12_5	YLR335W	NUP2	0.531683	0.516655	0.221042	0.170254	no	no	no	no
YLR341W::chr12_5	YLR341W	SPO77	0.546789	-0.0683075	0.212461	0.656141	no	no	no	no
YLR342W::chr12_5	YLR342W	FKS1	-0.616523	-1.04732	0.926928	0.996207	no	no	no	no
YLR344W::chr12_5	YLR344W	RPL26A	0.754646	0.776042	0.115041	0.0600856	no	no	no	no
YLR346C::chr00_11	YLR346C	YLR346C	0.147923	-0.0774675	0.489613	0.663916	no	no	no	no
YLR348C::chr12_5	YLR348C	DIC1	-0.339427	0.268218	0.820445	0.35285	no	no	no	no
YLR350W::chr12_5	YLR350W	ORM2	0.834284	0.232862	0.0878264	0.383718	yes	no	yes	no
YLR351C::chr12_5	YLR351C	NIT3	-0.20563	0.310204	0.744777	0.317429	no	no	no	no
YLR352W::chr12_5	YLR352W	YLR352W	-0.428399	-0.152246	0.861976	0.724548	no	no	no	no
YLR353W::chr12_5	YLR353W	BUD8	0.836296	0.291588	0.0872072	0.332952	no	no	no	no
YLR354C::chr12_5	YLR354C	TAL1	-0.0560949	-0.19169	0.64385	0.754205	no	no	no	no
YLR356W::chr12_5	YLR356W	ATG33	1.8447	0.880709	0.000467172	0.0362055	yes	no	yes	no
YLR360W::chr12_5	YLR360W	VPS38	0.239361	0.72576	0.419573	0.0752776	no	yes	no	yes
YLR361C::chr00_11	YLR361C	DCR2	0.0423169	0.408941	0.570766	0.24083	no	no	no	no
YLR363C::chr12_5	YLR363C	NMD4	0.398185	-0.15077	0.304907	0.723405	yes	no	yes	no
YLR366W::chr12_5	YLR366W	YLR366W	-0.112305	0.391124	0.683513	0.25387	no	no	no	no
YLR367W::chr12_5	YLR367W	RPS22B	0.55865	0.00969501	0.205862	0.587553	yes	no	yes	no
YLR368W::chr12_5	YLR368W	MDM30	1.26103	0.493935	0.0146252	0.183919	no	no	no	no
YLR371W::chr12_5	YLR371W	ROM2	0.222142	0.302061	0.432637	0.324182	no	no	no	no
YLR372W::chr12_5	YLR372W	SUR4	1.16549	0.125374	0.0230103	0.481366	no	no	no	no
YLR374C::chr12_5	YLR374C	YLR374C	0.0845983	-0.463226	0.53844	0.90605	no	no	no	no
YLR375W::chr12_5	YLR375W	STP3	-0.689322	-1.11397	0.944551	0.997631	no	no	no	no
YLR377C::chr12_5	YLR377C	FBP1	-0.689075	-0.892989	0.944497	0.989622	no	no	no	no
YLR380W::chr12_5	YLR380W	CSR1	1.3244	0.0141547	0.0106476	0.583527	no	no	no	no
YLR381W::chr12_5	YLR381W	CTF3	-0.330354	0.043902	0.815808	0.556464	no	no	no	no
YLR382C::chr00_11	YLR382C	NAM2	0.625295	0.0522053	0.171099	0.548858	no	no	no	no
YLR384C::chr12_5	YLR384C	IKI3	0.435758	0.183231	0.27993	0.428279	no	no	no	no
YLR385C::chr12_5	YLR385C	SWC7	-0.373964	-0.210327	0.837417	0.767596	no	no	no	no
YLR386W::chr12_5	YLR386W	VAC14	-0.0299054	0.154085	0.624791	0.454921	no	no	no	no
YLR387C::chr12_5	YLR387C	REH1	0.642209	-0.0874163	0.162911	0.672282	no	no	no	no
YLR390W-A::chr00_15	YLR390W-A	CCW14	0.289987	0.29782	0.381724	0.327722	no	no	no	no
YLR391W::chr12_5	YLR390W-A	CCW14	0.834284	-0.982151	0.0878264	0.994115	yes	no	yes	no
YLR393W::chr12_5	YLR393W	ATP10	0.426199	0.426199	0.28619	0.228555	yes	yes	yes	yes
YLR394W::chr00_11	YLR394W	CST9	-0.0556302	-0.0931822	0.643515	0.677091	no	no	no	no
YLR395C::chr12_5	YLR395C	COX8	0.456975	0.0989872	0.266279	0.505745	no	no	no	no
YLR398C::chr12_5	YLR398C	SKI2	0.624792	1.17962	0.171346	0.0064055	no	no	no	no
YLR401C::chr12_5	YLR401C	DUS3	0.639899	0.307202	0.164014	0.319912	no	no	no	no
YLR402W::chr12_5	YLR402W	YLR402W	0.359991	1.0743	0.331264	0.0123844	no	no	no	no
YLR406C::chr00_11	YLR406C	RPL31B	0.973687	0.372265	0.0521847	0.268067	yes	no	yes	no
YLR407W::chr12_5	YLR407W	YLR407W	0.0113828	0.613517	0.594133	0.119488	no	no	no	no
YLR408C::chr12_5	YLR408C	BLS1	0.369616	-0.179339	0.324536	0.745106	yes	no	yes	no
YLR412W::chr12_5	YLR412W	BER1	-0.41139	-0.260953	0.85459	0.801846	no	no	no	no
YLR413W::chr12_5	YLR413W	YLR413W	0.533115	0.279616	0.22022	0.343091	yes	no	yes	no
YLR414C::chr12_5	YLR414C	PUN1	1.53311	0.247194	0.00339866	0.371103	yes	no	yes	no
YLR415C::chr12_5	YLR415C	YLR415C	0.51822	0.175618	0.228854	0.435212	no	no	no	no
YLR418C::chr12_5	YLR418C	CDC73	0.51072	0.507553	0.233273	0.175648	no	no	no	no
YLR420W::chr12_3	YLR420W	URA4	0.461753	-0.670344	0.263252	0.963802	no	no	no	no
YLR423C::chr00_4	YLR423C	ATG17	0.050468	1.01035	0.564564	0.0180034	no	no	no	no
YLR425W::chr00_4	YLR425W	TUS1	1.99425	0.516655	0.000159731	0.170254	no	no	yes	no
YLR426W::chr00_4	YLR426W	TDA5	-0.00810218	0.702845	0.608686	0.0831044	no	no	no	no
YLR428C::chr00_4	YLR428C	YLR428C	0.70304	-0.135422	0.135605	0.711383	yes	no	yes	no
YLR431C::chr00_4	YLR431C	ATG23	0.583741	-0.41978	0.192309	0.88804	yes	no	yes	no
YLR432W::chr00_4	YLR432W	IMD3	0.412488	0.159961	0.295283	0.449529	no	no	no	no
YLR434C::chr00_4	YLR434C	YLR434C	-0.0987146	0.369814	0.674094	0.269941	no	no	no	no
YLR437C::chr00_4	YLR437C	DIF1	0.486384	0.228959	0.24793	0.387175	no	no	no	no
YLR438W::chr00_4	YLR438W	CAR2	0.011162	-0.0308328	0.594298	0.623673	yes	no	yes	no
YLR445W::chr00_4	YLR445W	GMC2	1.09872	0.916586	0.031021	0.0300787	no	no	no	no
YLR446W::chr00_4	YLR446W	YLR446W	0.0495493	-0.0578909	0.565264	0.647219	no	no	no	no
YLR447C::chr00_4	YLR447C	VMA6	-0.145088	0.011162	0.705741	0.58623	no	yes	no	yes
YLR449W::chr00_4	YLR449W	FPR4	-0.0158052	0.40974	0.614399	0.240254	no	no	no	no
YLR450W::chr00_4	YLR450W	HMG2	-0.357061	-0.312233	0.829245	0.833235	no	no	no	no
YLR451W::chr12_3	YLR451W	LEU3	1.35087	0.0983424	0.00928783	0.506341	no	no	no	no
YLR453C::chr00_4	YLR453C	RIF2	-0.0486654	-0.274056	0.638477	0.810188	no	no	no	no
YLR454W::chr00_4	YLR454W	FMP27	1.02954	1.02954	0.0416266	0.0161246	yes	yes	yes	yes
YLR455W::chr00_15	YLR455W	YLR455W	-0.483799	0.62357	0.884239	0.114906	no	no	no	no
YLR456W::chr00_4	YLR456W	YLR456W	1.30497	0.506163	0.0117527	0.176482	no	no	no	no
YLR460C::chr00_4	YLR460C	YLR460C	-0.166621	0.165814	0.719938	0.444168	no	no	no	no
YML001W::chr13_2	YML001W	YPT7	0.141311	0.200181	0.494717	0.412926	no	no	no	no
YML002W::chr13_2	YML002W	YML002W	0.369002	0.477766	0.324963	0.194049	no	no	no	no
YML003W::chr13_2	YML003W	YML003W	0.0362935	-0.12897	0.575338	0.706258	no	no	no	no
YML004C::chr13_2	YML004C	GLO1	-0.435857	-0.522025	0.865132	0.926893	no	no	no	no
YML007W::chr13_2	YML007W	YAP1	0.151652	0.106567	0.486736	0.498741	no	no	no	no
YML008C::chr13_2	YML008C	ERG6	0.906388	0.72425	0.0676147	0.0757752	no	no	no	no
YML009C::chr00_4	YML009C	MRPL39	-0.74335	-1.04827	0.955314	0.996231	no	no	no	no
YML009C::chr13_2	YML009C	MRPL39	-0.582978	-0.838826	0.917489	0.985626	no	no	no	no
YML010C-B::chr00_4	YML009C-A	YML009C-A	0.578111	0.884074	0.195301	0.0355903	no	no	no	no
YML011C::chr13_2	YML011C	RAD33	0.0116041	0.498479	0.593966	0.181133	no	no	no	no
YML013W::chr13_2	YML013W	UBX2	0.70304	0.587044	0.135605	0.132163	yes	no	yes	no
YML016C::chr13_2	YML016C	PPZ1	-0.652575	-0.311246	0.936128	0.832663	no	no	no	no
YML017W::chr13_2	YML017W	PSP2	0.55865	-0.627735	0.205862	0.955238	yes	no	yes	no
YML019W::chr13_2	YML019W	OST6	0.364374	-0.228442	0.328194	0.780215	no	no	no	no
YML020W::chr13_2	YML020W	YML020W	-0.167071	0.088197	0.72023	0.515713	no	no	no	no
YML024W::chr13_2	YML024W	RPS17A	0.581141	0.545224	0.193687	0.154019	no	no	no	no
YML026C::chr13_2	YML026C	RPS18B	2.10946	1.85597	6.62015e-05	2.49821e-05	yes	no	yes	yes
YML027W::chr00_11	YML027W	YOX1	0.138078	0.209226	0.497213	0.404786	no	no	no	no
YML028W::chr13_2	YML028W	TSA1	0.11069	-0.334482	0.51835	0.845797	no	no	no	no
YML029W::chr13_2	YML029W	USA1	0.578498	-0.188602	0.195095	0.751946	no	no	no	no
YML030W::chr13_2	YML030W	RCF1	-0.417721	-0.371235	0.85737	0.865141	no	no	no	no
YML033W::chr13_2	YML034W	SRC1	0.722905	1.84658	0.127409	2.74126e-05	no	no	no	yes
YML034W::chr13_2	YML034W	SRC1	0.655071	0.632132	0.156858	0.111104	no	no	no	no
YML035C-A::chr13_2	YML034C-A	YML034C-A	-0.412853	-0.625364	0.855235	0.954718	no	no	no	no
YML037C::chr13_2	YML037C	YML037C	0.724328	-0.166155	0.126836	0.735203	no	no	no	no
YML042W::chr00_11	YML042W	CAT2	1.25187	-0.228348	0.0152952	0.780151	no	no	no	no
YML047C::chr00_11	YML047C	PRM6	0.796205	-0.00237323	0.100172	0.598402	no	no	no	no
YML048W::chr13_1b	YML048W	GSF2	-0.562536	-0.13821	0.911302	0.713585	no	no	no	no
YML050W::chr13_1b	YML050W	AIM32	-0.196677	0.300926	0.73918	0.325127	no	no	no	no
YML051W::chr13_1b	YML051W	GAL80	0.246761	-0.0620485	0.413985	0.65079	no	no	no	no
YML052W::chr13_1b	YML052W	SUR7	0.18578	-0.0287791	0.460451	0.621865	no	no	no	no
YML053C::chr13_1b	YML053C	YML053C	-0.270834	-0.183785	0.783575	0.748401	no	no	no	no
YML054C::chr13_1b	YML054C	CYB2	-0.50174	-0.189614	0.89087	0.752688	no	no	no	no
YML055W::chr13_1b	YML055W	SPC2	-0.457327	-0.202059	0.873941	0.761706	no	no	no	no
YML056C::chr13_1b	YML056C	IMD4	-0.055451	0.156985	0.643385	0.452259	no	no	no	no
YML058W::chr13_1b	YML058W	SML1	-0.442869	-0.517292	0.868054	0.925358	no	no	no	no
YML059C::chr13_1b	YML059C	NTE1	0.0947212	0.295441	0.530654	0.329715	no	no	no	no
YML060W::chr13_1b	YML060W	OGG1	-0.547368	-0.101474	0.906493	0.683955	no	no	no	no
YML061C::chr13_1b	YML061C	PIF1	0.842284	1.44993	0.0853836	0.000919179	no	no	no	yes
YML062C::chr13_1b	YML062C	MFT1	-0.592439	-0.703023	0.920239	0.969419	no	no	no	no
YML063W::chr13_1b	YML063W	RPS1B	-0.152506	-0.0382503	0.710669	0.630178	no	no	no	no
YML067C::chr00_12	YML067C	ERV41	-0.89877	-0.831607	0.977222	0.985004	no	no	no	no
YML068W::chr00_12	YML068W	ITT1	-0.186387	0.425025	0.732669	0.229379	no	no	no	no
YML070W::chr00_9	YML070W	DAK1	-0.081159	-0.157012	0.66176	0.728222	no	no	no	no
YML071C::chr00_9	YML071C	COG8	-0.111605	-0.0894721	0.68303	0.674	no	no	no	no
YML072C::chr00_12	YML072C	TCB3	0.217613	0.101618	0.436086	0.503314	yes	no	yes	no
YML074C::chr00_9	YML074C	FPR3	0.406612	0.32401	0.29922	0.306118	no	no	no	no
YML076C::chr00_11	YML076C	WAR1	0.011162	-0.782905	0.594298	0.980175	yes	no	yes	no
YML078W::chr13_1b	YML078W	CPR3	-0.961499	-1.37126	0.983034	0.999687	no	no	no	no
YML079W::chr13_1b	YML079W	YML079W	0.543723	0.158355	0.214187	0.451003	no	no	no	no
YML080W::chr13_1b	YML080W	DUS1	1.67455	0.624511	0.00143981	0.114484	no	no	no	no
YML081C-A::chr00_4	YML081C-A	ATP18	-0.0222315	-0.0199445	0.619146	0.61406	no	no	no	no
YML081W::chr13_1b	YML081W	TDA9	-0.483046	0.315958	0.883954	0.312694	no	no	no	no
YML082W::chr13_1b	YML082W	YML082W	-0.10963	-0.17629	0.681668	0.742834	no	no	no	no
YML084W::chr13_1b	YML084W	YML084W	-0.833703	-0.50888	0.969505	0.922571	no	no	no	no
YML086C::chr00_11	YML086C	ALO1	-0.648373	-0.440276	0.935104	0.896823	no	no	no	no
YML087C::chr13_1b	YML087C	AIM33	-0.177633	-0.52578	0.727066	0.928093	no	no	no	no
YML088W::chr13_1b	YML088W	UFO1	0.376864	0.498733	0.319507	0.180978	no	no	no	no
YML090W::chr00_9	YML090W	YML090W	-0.149204	-0.797005	0.70848	0.981693	no	no	no	no
YML095C-A::chr00_9	YML094C-A	YML094C-A	0.125057	0.152025	0.507264	0.456814	no	yes	no	yes
YML096W::chr00_9	YML096W	YML096W	-0.325253	-0.458892	0.813169	0.904356	no	no	no	no
YML097C::chr00_9	YML097C	VPS9	0.00577032	0.861303	0.598339	0.0399238	no	no	no	no
YML100W-A::chr00_9	YML100W-A	YML100W-A	-0.487621	-0.0627693	0.885675	0.651408	no	no	no	no
YML100W::chr00_9	YML100W	TSL1	-0.309644	-0.355119	0.804948	0.856874	no	no	no	no
YML101C::chr00_9	YML101C	CUE4	0.506147	0.122376	0.235989	0.484134	no	no	no	no
YML102C-A::chr00_9	YML101C-A	YML101C-A	0.142781	0.678244	0.493581	0.0921719	no	no	no	no
YML102W::chr00_9	YML102W	CAC2	0.615269	0.41521	0.176074	0.236331	no	no	no	no
YML103C::chr00_9	YML103C	NUP188	-0.38867	-0.2907	0.844316	0.820467	no	no	no	no
YML104C::chr00_9	YML104C	MDM1	0.791849	-0.172143	0.101661	0.739726	yes	no	yes	no
YML107C::chr00_9	YML107C	PML39	0.435758	1.25362	0.27993	0.00390229	no	no	no	no
YML108W::chr00_9	YML108W	YML108W	0.0119504	0.289245	0.593706	0.334928	no	no	no	no
YML109W::chr00_9	YML109W	ZDS2	-0.316804	-0.987689	0.808746	0.994326	no	no	no	no
YML110C::chr00_9	YML110C	COQ5	1.18422	-0.126023	0.021105	0.703902	no	no	no	no
YML111W::chr00_9	YML111W	BUL2	0.273029	0.412819	0.394296	0.238041	no	no	no	no
YML113W::chr00_9	YML113W	DAT1	0.371982	0.860139	0.322891	0.0401563	no	no	no	no
YML115C::chr00_15	YML115C	VAN1	-0.281088	-0.233478	0.78935	0.783652	no	no	no	no
YML116W::chr00_9	YML116W	ATR1	0.901609	0.436165	0.0688319	0.22163	no	no	no	no
YML117W-A::chr00_9	YML116W-A	YML116W-A	-0.380279	0.0153504	0.840404	0.582445	no	no	no	no
YML117W::chr00_9	YML117W	NAB6	-0.0132267	0.945498	0.612489	0.0257904	no	no	no	no
YML119W::chr00_9	YML119W	YML119W	0.935213	0.893218	0.0606217	0.0339624	yes	no	yes	no
YML120C::chr00_9	YML120C	NDI1	-0.541606	-0.615795	0.904616	0.952566	no	no	no	no
YML121W::chr00_9	YML121W	GTR1	1.48065	1.48065	0.00459263	0.000720433	yes	yes	yes	yes
YML123C::chr00_9	YML123C	PHO84	-0.116783	-0.0683075	0.686591	0.656141	no	no	no	no
YML124C::chr00_9	YML124C	TUB3	-0.0151355	0.329376	0.613903	0.30177	no	no	no	no
YML129C::chr00_9	YML129C	COX14	-0.154366	0.120354	0.711899	0.486001	no	no	no	no
YML131W::chr00_9	YML131W	YML131W	0.748128	0.706133	0.117508	0.0819453	yes	no	yes	no
YMR002W::chr13_2	YMR002W	MIC17	0.378802	-0.275404	0.318168	0.811034	no	no	no	no
YMR003W::chr13_2	YMR003W	AIM34	-0.354156	0.134001	0.827815	0.473406	no	no	no	no
YMR004W::chr00_9	YMR004W	MVP1	-0.38367	0.161174	0.841992	0.448418	no	no	no	no
YMR006C::chr13_2	YMR006C	PLB2	-0.0838506	0.0915638	0.663663	0.512604	no	no	no	no
YMR007W::chr13_2	YMR007W	YMR007W	0.26968	0.331099	0.396792	0.30038	no	no	no	no
YMR008C::chr13_2	YMR008C	PLB1	-0.405158	-0.254721	0.851818	0.797802	no	no	no	no
YMR009W::chr13_2	YMR009W	ADI1	-0.438711	-0.233367	0.866327	0.783576	no	no	no	no
YMR010W::chr13_2	YMR010W	YMR010W	-0.788085	-0.0270848	0.962893	0.620372	no	no	no	no
YMR011W::chr13_2	YMR011W	HXT2	0.263406	0.776414	0.40148	0.0599827	no	no	no	no
YMR012W::chr13_2	YMR012W	CLU1	-0.0536267	-0.215865	0.642068	0.771496	no	no	no	no
YMR014W::chr13_2	YMR014W	BUD22	0.213366	1.36962	0.439325	0.0016996	no	yes	no	yes
YMR015C::chr13_2	YMR015C	ERG5	-0.615718	0.310204	0.926712	0.317429	no	no	no	no
YMR017W::chr13_2	YMR017W	SPO20	0.545247	0.121035	0.213328	0.485372	no	no	no	no
YMR018W::chr13_2	YMR018W	YMR018W	0.571557	0.370804	0.19882	0.269183	no	no	no	no
YMR019W::chr13_2	YMR019W	STB4	-0.0210995	-0.15077	0.618311	0.723405	no	no	no	no
YMR020W::chr13_2	YMR020W	FMS1	-0.212191	0.138043	0.748839	0.46968	no	no	no	no
YMR021C::chr13_2	YMR021C	MAC1	0.798328	-0.620849	0.0994519	0.953712	no	no	no	no
YMR022W::chr13_2	YMR022W	UBC7	-0.026513	0.0382642	0.622298	0.561618	no	no	no	no
YMR023C::chr13_2	YMR023C	MSS1	-0.443226	-0.650899	0.868202	0.960077	no	no	no	no
YMR027W::chr13_2	YMR027W	YMR027W	0.679956	-0.786537	0.145573	0.980576	yes	no	yes	no
[truncated: 1,873 more rows]

## Sheet: flight-ground 14G
Strain	ORF	Gene	Log2ratio	P	DropsOut	Significant
YER118C::chr00_5	YER118C	SHO1	3.28418	5.4645e-10	yes	yes
YDR254W::chr4_6	YDR254W	CHL4	2.31261	1.24852e-05	no	yes
YPL041C::chr16_3	YPL041C	YPL041C	2.22235	2.66793e-05	no	yes
YER151C::chr00_5	YER151C	UBP3	2.19356	3.37856e-05	no	yes
YML026C::chr13_2	YML026C	RPS18B	2.10946	6.62015e-05	yes	yes
YMR244W::chr13_5	YMR244W	YMR244W	2.09872	7.20101e-05	no	yes
YGR187C::chr7_5	YGR187C	HGH1	2.00136	0.000151491	no	yes
YLR425W::chr00_4	YLR425W	TUS1	1.99425	0.000159731	no	yes
YMR042W::chr13_2	YMR042W	ARG80	1.98315	0.000173447	yes	yes
YLR287C-A::chr12_4	YLR287C-A	RPS30A	1.97369	0.000185997	yes	yes
YGR257C::chr00_17a	YGR257C	MTM1	1.95866	0.00020769	no	yes
YKL162C-A::chr00_3	YKL162C-A	YKL162C-A	1.95201	0.000218028	no	yes
YGL217C::chr7_3/chr00_12	YGL217C	YGL217C	1.92543	0.000264315	yes	yes
YBR077C::chr2_2	YBR077C	SLM4	1.9167	0.000281427	no	yes
YDR296W::chr4_6	YDR296W	MHR1	1.88549	0.000351348	no	yes
YBR050C::chr2_2	YBR050C	REG2	1.86106	0.00041701	no	yes
YLR356W::chr12_5	YLR356W	ATG33	1.8447	0.000467172	yes	yes
YHR158C::chr8_3	YHR158C	KEL1	1.82379	0.000539408	yes	yes
YBR023C::chr2_2	YBR023C	CHS3	1.81663	0.000566441	no	yes
YMR282C::chr13_5	YMR282C	AEP2	1.79682	0.000647836	no	yes
YNL147W::chr00_18	YNL147W	LSM7	1.77408	0.000754562	no	yes
YDR414C::chr4_7	YDR414C	ERD1	1.75769	0.000841294	no	yes
YCR031C::chr00_1	YCR031C	RPS14A	1.73832	0.000955514	no	yes
YPL208W::chr16_1	YPL208W	RKM1	1.73699	0.000963883	yes	yes
YBR041W::chr2_2	YBR041W	FAT1	1.72576	0.00103704	yes	yes
YLR133W::chr12_3	YLR133W	CKI1	1.71444	0.00111589	yes	yes
YFR031C-A::chr6_1	YFR031C-A	RPL2A	1.70304	0.0012009	yes	yes
YDR385W::chr4_7	YDR385W	EFT2	1.64462	0.00173672	yes	yes
YDL239C::chr4_3	YDL239C	ADY3	1.62058	0.00201458	yes	yes
YPL086C::chr16_3	YPL086C	ELP3	1.6084	0.00217014	yes	yes
YHL034C::chr8_1	YHL034C	SBP1	1.58374	0.00251908	yes	yes
YNL224C::chr14_2	YNL224C	SQS1	1.55865	0.00292539	yes	yes
YOL043C::chr15_5	YOL043C	NTG2	1.55865	0.00292539	yes	yes
YLR414C::chr12_5	YLR414C	PUN1	1.53311	0.00339866	yes	yes
YJR050W::chr00_13	YJR050W	ISY1	1.53311	0.00339866	yes	yes
YCR037C::chr00_1	YCR037C	PHO87	1.50712	0.00395006	yes	yes
YMR143W::chr13_4	YMR143W	RPS16A	1.50712	0.00395006	yes	yes
YML121W::chr00_9	YML121W	GTR1	1.48065	0.00459263	yes	yes
YGR223C::chr00_2	YGR223C	HSV2	1.48065	0.00459263	yes	yes
YBR061C::chr2_2	YBR061C	TRM7	1.46723	0.00495276	yes	yes
YBR067C::chr2_2	YBR067C	TIP1	1.46723	0.00495276	yes	yes
YGL236C::chr7_3	YGL236C	MTO1	1.45368	0.00534158	yes	yes
YPL080C::chr16_3	YPL080C	YPL080C	1.45368	0.00534158	yes	yes
YDR293C::chr4_6	YDR293C	SSD1	1.44001	0.00576138	yes	yes
YIR023W::chr00_17b	YIR023W	DAL81	1.44001	0.00576138	yes	yes
YMR214W::chr13_4	YMR214W	SCJ1	1.44001	0.00576138	yes	yes
YNL073W::chr00_16b	YNL073W	MSK1	1.44001	0.00576138	yes	yes
YIL099W::chr9_2	YIL099W	SGA1	1.41226	0.00670407	yes	yes
YOR315W::chr15_4	YOR315W	SFG1	1.41226	0.00670407	yes	yes
YFR041C::chr00_2	YFR041C	ERJ5	1.36962	0.00841921	yes	yes
YLR004C::chr12_1	YLR004C	THI73	1.36962	0.00841921	yes	yes
YNL010W::chr14_4	YNL010W	YNL010W	1.34047	0.00980273	yes	yes
YBR250W::chr2_4	YBR250W	SPO23	1.31072	0.0114156	yes	yes
YHR194W::chr00_10	YHR194W	MDM31	1.31072	0.0114156	yes	yes
YDR500C::chr00_17a	YDR500C	RPL37B	1.29562	0.0123196	yes	yes
YHR171W::chr00_15	YHR171W	ATG7	1.29562	0.0123196	yes	yes
YBL039C::chr2_1	YBL039C	URA7	1.26492	0.014349	yes	yes
YNR075W::chr00_6	YNR075W	COS10	1.26492	0.014349	yes	yes
YPL098C::chr16_2	YPL098C	MGR2	1.26492	0.014349	yes	yes
YDR395W::chr4_7	YDR395W	SXM1	1.24932	0.0154862	yes	yes
YDR504C::chr4_8	YDR504C	SPG3	1.24932	0.0154862	yes	yes
YKR051W::chr11_3	YKR051W	YKR051W	1.24932	0.0154862	yes	yes
YLR084C::chr12_2	YLR084C	RAX2	1.23355	0.0167136	yes	yes
YPL073C::chr16_3	YPL073C	YPL073C	1.23355	0.0167136	yes	yes
YOR140W::chr15_2	YOR140W	SFL1	1.23355	0.0167136	yes	yes
YAR043C::chr1_1	deleted	YAR043C	1.18519	0.0210098	yes	yes
YMR103C::chr00_9	YMR103C	YMR103C	1.18519	0.0210098	yes	yes
YBL069W::chr2_1	YBL069W	AST1	1.1687	0.0226737	yes	yes
YMR174C::chr13_4	YMR174C	PAI3	1.1687	0.0226737	yes	yes
YOL083W::chr15_5	YOL083W	ATG34	1.1687	0.0226737	yes	yes
YCL024W::chr3_1	YCL024W	KCC4	1.1687	0.0226737	yes	yes
YBR183W::chr2_4	YBR183W	YPC1	1.15202	0.0244684	yes	yes
YER175C::chr00_5	YER175C	TMT1	1.15202	0.0244684	yes	yes
YLR315W::chr12_4	YLR315W	NKP2	1.15202	0.0244684	yes	yes
YNL063W::chr14_3	YNL063W	MTQ1	1.15202	0.0244684	yes	yes
YBR171W::chr2_3	YBR171W	SEC66	1.13515	0.026404	yes	yes
YBR197C::chr2_4	YBR197C	YBR197C	1.11808	0.0284911	yes	yes
YDR425W::chr4_7	YDR425W	SNX41	1.11808	0.0284911	yes	yes
YMR083W::chr00_6	YMR083W	ADH3	1.11808	0.0284911	yes	yes
YPR063C::chr16_4	YPR063C	YPR063C	1.11808	0.0284911	yes	yes
YMR096W::chr00_9	YMR096W	SNZ1	1.1008	0.0307411	yes	yes
YOR131C::chr15_2	YOR131C	YOR131C	1.1008	0.0307411	yes	yes
YOR348C::chr15_4	YOR348C	PUT4	1.1008	0.0307411	yes	yes
YBR101C::chr2_3	YBR101C	FES1	1.08331	0.0331662	yes	yes
YLR214W::chr12_3	YLR214W	FRE1	1.08331	0.0331662	yes	yes
YMR247C::chr13_5	YMR247C	RKR1	1.08331	0.0331662	yes	yes
YGR007W::chr7_3	YGR007W	ECT1	1.06561	0.0357794	yes	yes
YHR038W::chr8_1	YHR038W	RRF1	1.06561	0.0357794	yes	yes
YPL099C::chr16_2	YPL099C	AIM43	1.04769	0.0385946	yes	yes
YGL125W::chr7_2	YGL125W	MET13	1.04738	0.0386444	yes	yes
YLR454W::chr00_4	YLR454W	FMP27	1.02954	0.0416266	yes	yes
YBL009W::chr2_1	YBL009W	ALK2	0.992546	0.0484044	yes	yes
YPL074W::chr16_3	YPL074W	YTA6	0.992546	0.0484044	yes	yes
YBR019C::chr2_2	YBR019C	GAL10	0.973687	0.0521847	yes	yes
YMR102C::chr00_9	YMR102C	YMR102C	0.973687	0.0521847	yes	yes
YJL196C::chr00_14	YJL196C	ELO1	0.973687	0.0521847	yes	yes
YJR049C::chr00_13	YJR049C	UTR1	0.973687	0.0521847	yes	yes
YLR406C::chr00_11	YLR406C	RPL31B	0.973687	0.0521847	yes	yes
YMR172W::chr00_12	YMR172W	HOT1	0.963316	0.0543614	yes	yes
YAL059W::chr1_1	YAL059W	ECM1	0.954578	0.0562506	yes	yes
YBR034C::chr2_2	YBR034C	HMT1	0.954578	0.0562506	yes	yes
YNL329C::chr14_1	YNL329C	PEX6	0.954578	0.0562506	yes	yes
YOL116W::chr00_6	YOL116W	MSN1	0.954578	0.0562506	yes	yes
YMR250W::chr13_5	YMR250W	GAD1	0.954578	0.0562506	yes	yes
YDR409W::chr4_7	YDR409W	SIZ1	0.935213	0.0606217	yes	yes
YIL095W::chr9_1	YIL095W	PRK1	0.935213	0.0606217	yes	yes
YML119W::chr00_9	YML119W	YML119W	0.935213	0.0606217	yes	yes
YBL083C::chr2_1	YBL083C	YBL083C	0.915584	0.065319	yes	yes
YDR406W::chr4_7	YDR406W	PDR15	0.915584	0.065319	yes	yes
YOR027W::chr15_1	YOR027W	STI1	0.915584	0.065319	yes	yes
YOR165W::chr15_2	YOR165W	SEY1	0.914407	0.0656095	yes	yes
YGL227W::chr7_3	YGL227W	VID30	0.895685	0.0703645	yes	yes
YGR011W::chr7_3/chr00_12	YGR011W	YGR011W	0.895685	0.0703645	yes	yes
YJL133W::chr10_1	YJL133W	MRS3	0.895685	0.0703645	yes	yes
YPL155C::chr16_2	YPL155C	KIP2	0.895685	0.0703645	yes	yes
YBR040W::chr2_2	YBR040W	FIG1	0.875507	0.0757812	yes	yes
YER051W::chr5_3	YER051W	JHD1	0.875507	0.0757812	yes	yes
YLR209C::chr12_3	YLR209C	PNP1	0.875507	0.0757812	yes	yes
YLR213C::chr12_3	YLR213C	CRR1	0.875507	0.0757812	yes	yes
YKL106W::chr11_2	YKL106W	AAT1	0.875507	0.0757812	yes	yes
YMR161W::chr13_4	YMR161W	HLJ1	0.875507	0.0757812	yes	yes
YPL105C::chr16_2	YPL105C	SYH1	0.855043	0.0815934	yes	yes
YDR451C::chr4_8	YDR451C	YHP1	0.855043	0.0815934	yes	yes
YGL141W::chr7_2	YGL141W	HUL5	0.834284	0.0878264	yes	yes
YGR004W::chr7_3	YGR004W	PEX31	0.834284	0.0878264	yes	yes
YLR350W::chr12_5	YLR350W	ORM2	0.834284	0.0878264	yes	yes
YLR391W::chr12_5	YLR390W-A	CCW14	0.834284	0.0878264	yes	yes
YPL216W::chr16_1	YPL216W	YPL216W	0.813223	0.0945066	yes	yes
YGR110W::chr00_14	YGR110W	CLD1	0.813223	0.0945066	yes	yes
YPR115W::chr16_5	YPR115W	RGC1	0.811313	0.0951302	yes	yes
YNL299W::chr14_1	YNL299W	TRF5	0.811313	0.0951302	yes	yes
YPL273W::chr16_1	YPL273W	SAM4	0.800587	0.09869	yes	yes
YML104C::chr00_9	YML104C	MDM1	0.791849	0.101661	yes	yes
YNL072W::chr00_16b	YNL072W	RNH201	0.791849	0.101661	yes	yes
YNL270C::chr14_1	YNL270C	ALP1	0.791849	0.101661	yes	yes
YER024W::chr5_3	YER024W	YAT2	0.791849	0.101661	yes	yes
YOL085C::chr15_5	YOL085C	YOL085C	0.791849	0.101661	yes	yes
YOR068C::chr15_1	YOR068C	VAM10	0.791849	0.101661	yes	yes
YBR185C::chr2_4	YBR185C	MBA1	0.770154	0.109319	yes	yes
YDR370C::chr4_7	YDR370C	YDR370C	0.770154	0.109319	yes	yes
YLR427W::chr00_4	YLR427W	MAG2	0.756866	0.114209	yes	yes
YML131W::chr00_9	YML131W	YML131W	0.748128	0.117508	yes	yes
YPL070W::chr16_3	YPL070W	MUK1	0.748128	0.117508	yes	yes
YPL088W::chr16_3	YPL088W	YPL088W	0.748128	0.117508	yes	yes
YBR186W::chr2_4	YBR186W	PCH2	0.72576	0.12626	yes	yes
YNL273W::chr14_1	YNL273W	TOF1	0.72576	0.12626	yes	yes
YIL102C::chr9_2	YIL102C	YIL102C	0.72576	0.12626	yes	yes
YLR098C::chr12_2	YLR098C	CHA4	0.70304	0.135605	yes	yes
YLR428C::chr00_4	YLR428C	YLR428C	0.70304	0.135605	yes	yes
YBL011W::chr2_1	YBL011W	SCT1	0.679956	0.145573	yes	yes
YEL011W::chr00_8	YEL011W	GLC3	0.679956	0.145573	yes	yes
YER087C-A::chr5_3	YER087C-A	YER087C-A	0.679956	0.145573	yes	yes
YER134C::chr00_5	YER134C	YER134C	0.679956	0.145573	yes	yes
YGL257C::chr7_3	YGL257C	MNT2	0.679956	0.145573	yes	yes
YMR027W::chr13_2	YMR027W	YMR027W	0.679956	0.145573	yes	yes
YAL012W::chr00_12	YAL012W	CYS3	0.656497	0.156196	yes	yes
YBL066C::chr2_1	YBL066C	SEF1	0.656497	0.156196	yes	yes
YKL102C::chr11_2	YKL102C	YKL102C	0.656497	0.156196	yes	yes
YMR284W::chr13_5	YMR284W	YKU70	0.656497	0.156196	yes	yes
YNL269W::chr14_1	YNL269W	BSC4	0.656497	0.156196	yes	yes
YPR013C::chr00_15	YPR013C	YPR013C	0.656497	0.156196	yes	yes
YOL095C::chr00_6	YOL095C	HMI1	0.641388	0.163302	yes	yes
YDL041W::chr4_1	YDL041W	YDL041W	0.629315	0.169129	yes	yes
YOR320C::chr15_4	YOR320C	GNT1	0.608403	0.179534	yes	yes
YBR053C::chr2_2	YBR053C	YBR053C	0.583741	0.192309	yes	yes
YDR242W::chr00_17a	YDR242W	AMD2	0.583741	0.192309	yes	yes
YDR512C::chr00_17a	YDR512C	EMI1	0.583741	0.192309	yes	yes
YGL263W::chr7_3	YGL263W	COS12	0.583741	0.192309	yes	yes
YKR039W::chr00_14	YKR039W	GAP1	0.583741	0.192309	yes	yes
YKR050W::chr11_3	YKR050W	TRK2	0.583741	0.192309	yes	yes
YLR431C::chr00_4	YLR431C	ATG23	0.583741	0.192309	yes	yes
YOL118C::chr00_6	YOL118C	YOL118C	0.583741	0.192309	yes	yes
YMR153W::chr13_4	YMR153W	NUP53	0.583741	0.192309	yes	yes
YBR130C::chr2_3	YBR130C	SHE3	0.55865	0.205862	yes	yes
YLR134W::chr12_3	YLR134W	PDC5	0.55865	0.205862	yes	yes
YLR367W::chr12_5	YLR367W	RPS22B	0.55865	0.205862	yes	yes
YLR067C::chr12_2	YLR067C	PET309	0.55865	0.205862	yes	yes
YOR113W::chr15_2	YOR113W	AZF1	0.55865	0.205862	yes	yes
YER071C::chr5_3	YER071C	TDA2	0.554677	0.208059	yes	yes
YIL084C::chr9_1	YIL084C	SDS3	0.533115	0.22022	yes	yes
YKR097W::chr00_4	YKR097W	PCK1	0.533115	0.22022	yes	yes
YLR413W::chr12_5	YLR413W	YLR413W	0.533115	0.22022	yes	yes
YHR113W::chr8_2	YHR113W	APE4	0.533115	0.22022	yes	yes
YOL151W::chr00_17b/chr00_18	YOL151W	GRE2	0.528914	0.222637	yes	yes
YGR254W::chr00_17a	YGR254W	ENO1	0.528914	0.222637	yes	yes
YKL011C::chr11_1	YKL011C	CCE1	0.515857	0.230241	yes	yes
YGR003W::chr7_3	YGR003W	CUL3	0.507119	0.23541	yes	yes
YNL111C::chr00_18	YNL111C	CYB5	0.507119	0.23541	yes	yes
YPL062W::chr16_3	YPL062W	YPL062W	0.507119	0.23541	yes	yes
YKL100C::chr11_2	YKL100C	YKL100C	0.507119	0.23541	yes	yes
YNR055C::chr00_15	YNR055C	HOL1	0.507119	0.23541	yes	yes
YMR072W::chr00_6	YMR072W	ABF2	0.502682	0.23806	yes	yes
YBR115C::chr2_3	YBR115C	LYS2	0.480647	0.251456	yes	yes
YDR322W::chr4_6	YDR322W	MRPL35	0.480647	0.251456	yes	yes
YDR432W::chr4_7	YDR432W	NPL3	0.480647	0.251456	yes	yes
YLR049C::chr12_2	YLR049C	YLR049C	0.480647	0.251456	yes	yes
YPL058C::chr16_3	YPL058C	PDR12	0.480647	0.251456	yes	yes
YBR267W::chr2_4	YBR267W	REI1	0.475965	0.254353	yes	yes
YJR083C::chr10_4	YJR083C	ACF4	0.462418	0.262832	yes	yes
YDR248C::chr4_6	YDR248C	YDR248C	0.45368	0.268377	yes	yes
YGL203C::chr7_3	YGL203C	KEX1	0.45368	0.268377	yes	yes
YHR159W::chr8_3	YHR159W	TDA11	0.45368	0.268377	yes	yes
YJL017W::chr00_13	YJL016W	YJL016W	0.45368	0.268377	yes	yes
YOL131W::chr00_6	YOL131W	YOL131W	0.45368	0.268377	yes	yes
YLL052C::chr12_1	YLL052C	AQY2	0.45368	0.268377	yes	yes
YEL064C::chr5_2	YEL064C	AVT2	0.448743	0.271535	yes	yes
YBL053W::chr2_1	YBL053W	YBL053W	0.426199	0.28619	yes	yes
YBL085W::chr2_1	YBL085W	BOI1	0.426199	0.28619	yes	yes
YDR511W::chr4_8	YDR511W	ACN9	0.426199	0.28619	yes	yes
YHR181W::chr00_8	YHR181W	SVP26	0.426199	0.28619	yes	yes
YLR063W::chr12_2	YLR063W	YLR063W	0.426199	0.28619	yes	yes
YMR167W::chr13_4	YMR167W	MLH1	0.426199	0.28619	yes	yes
YGR160W::chr7_5	YGR160W	YGR160W	0.426199	0.28619	yes	yes
YJR126C::chr00_12	YJR126C	VPS70	0.420998	0.289623	yes	yes
YLL056C::chr12_1	YLL056C	YLL056C	0.406923	0.299011	yes	yes
YOL004W::chr15_5	YOL004W	SIN3	0.406923	0.299011	yes	yes
YHR138C::chr8_2	YHR138C	YHR138C	0.398185	0.304907	yes	yes
YLR092W::chr12_2	YLR092W	SUL2	0.398185	0.304907	yes	yes
YLR136C::chr12_3	YLR136C	TIS11	0.398185	0.304907	yes	yes
YLR322W::chr12_4	YLR322W	VPS65	0.398185	0.304907	yes	yes
YIL002C::chr9_1	YIL002C	INP51	0.398185	0.304907	yes	yes
YNL292W::chr14_1	YNL292W	PUS4	0.398185	0.304907	yes	yes
YDR329C::chr4_6	YDR329C	PEX3	0.369616	0.324536	yes	yes
YNR008W::chr14_4	YNR008W	LRO1	0.369616	0.324536	yes	yes
YDL192W::chr4_3	YDL192W	ARF1	0.369616	0.324536	yes	yes
YBR246W::chr2_4	YBR246W	RRT2	0.349208	0.338867	yes	yes
YDR251W::chr4_6	YDR251W	PAM1	0.34047	0.345076	yes	yes
YJL098W::chr10_2	YJL098W	SAP185	0.34047	0.345076	yes	yes
YNL123W::chr14_3	YNL123W	NMA111	0.34047	0.345076	yes	yes
YMR074C::chr00_15	YMR074C	YMR074C	0.34047	0.345076	yes	yes
YKR041W::chr00_14	YKR041W	YKR041W	0.310722	0.366521	yes	yes
YLR225C::chr12_3	YLR225C	YLR225C	0.310722	0.366521	yes	yes
YNL334C::chr14_1	YNL334C	SNO2	0.310722	0.366521	yes	yes
YDL116W::chr4_2	YDL116W	NUP84	0.304353	0.371169	yes	yes
YDR233C::chr4_5	YDR233C	RTN1	0.289087	0.382388	yes	yes
YDL099W::chr4_2	YDL099W	BUG1	0.280349	0.388855	yes	yes
YDR402C::chr4_7	YDR402C	DIT2	0.280349	0.388855	yes	yes
YKR024C::chr11_3	YKR024C	DBP7	0.280349	0.388855	yes	yes
YNL145W::chr14_3	YNL145W	MFA2	0.280349	0.388855	yes	yes
YBR245C::chr2_4	YBR245C	ISW1	0.280349	0.388855	yes	yes
YJR115W::chr10_4	YJR115W	YJR115W	0.25806	0.405486	yes	yes
YOR188W::chr15_2	YOR188W	MSB1	0.25806	0.405486	yes	yes
YBL017C::chr2_1	YBL017C	PEP1	0.249322	0.412055	yes	yes
YGL235W::chr7_3/chr00_12	YGL235W	YGL235W	0.249322	0.412055	yes	yes
YGL261C::chr7_3	YGL261C	PAU11	0.249322	0.412055	yes	yes
YNL074C::chr00_16b	YNL074C	MLF3	0.249322	0.412055	yes	yes
YGR184C::chr7_5	YGR184C	UBR1	0.242292	0.417357	yes	yes
YOL147C::chr00_15	YOL147C	PEX11	0.242292	0.417357	yes	yes
YKL067W::chr11_1	YKL067W	YNK1	0.226351	0.429436	yes	yes
YGR131W::chr7_5	YGR131W	FHN1	0.217613	0.436086	yes	yes
YHR012W::chr8_1	YHR012W	VPS29	0.217613	0.436086	yes	yes
YML072C::chr00_12	YML072C	TCB3	0.217613	0.436086	yes	yes
YPL015C::chr16_3	YPL015C	HST2	0.217613	0.436086	yes	yes
YOR137C::chr15_2	YOR137C	SIA1	0.210231	0.441718	yes	yes
YDR123C::chr4_4	YDR123C	INO2	0.193929	0.454195	yes	yes
YPR083W::chr00_18	YPR083W	MDM36	0.185191	0.460903	yes	yes
YPL130W::chr16_2	YPL130W	SPO19	0.177441	0.466861	yes	yes
YJR070C::chr00_12	YJR070C	LIA1	0.177441	0.466861	yes	yes
YOR339C::chr15_4	YOR339C	UBC11	0.160762	0.479708	yes	yes
YHL023C::chr8_1	YHL023C	NPR3	0.152025	0.486448	yes	yes
YBR228W::chr2_4	YBR228W	SLX1	0.118077	0.512651	yes	yes
YCR025C::chr00_1	YCR025C	YCR025C	0.118077	0.512651	yes	yes
YPR023C::chr00_15	YPR023C	EAF3	0.118077	0.512651	yes	yes
YDR143C::chr4_4	YDR143C	SAN1	0.118077	0.512651	yes	yes
YOR296W::chr15_4	YOR296W	YOR296W	0.109537	0.519239	yes	yes
YJR040W::chr00_13	YJR040W	GEF1	0.0833118	0.539428	yes	yes
YGR107W::chr7_4	YGR107W	YGR107W	0.0743477	0.546309	yes	yes
YBR195C::chr2_4	YBR195C	MSI1	0.0476879	0.566682	yes	yes
YPL009C::chr16_3	YPL009C	TAE2	0.0476879	0.566682	yes	yes
YOR208W::chr15_3	YOR208W	PTP2	0.0198999	0.587729	yes	yes
YDR484W::chr4_8	YDR484W	VPS52	0.011162	0.594298	yes	yes
YLR438W::chr00_4	YLR438W	CAR2	0.011162	0.594298	yes	yes
YML076C::chr00_11	YML076C	WAR1	0.011162	0.594298	yes	yes

## Sheet: flight-ground 21G
Strain	ORF	Gene	Log2ratio	P	DropsOut	Significant
YGR027C::chr7_4	YGR027C	RPS25A	3.04317	5.01521e-12	yes	yes
YNL147W::chr00_18	YNL147W	LSM7	2.6084	3.3379e-09	yes	yes
YDR017C::chr4_3	YDR017C	KCS1	2.4294	3.63838e-08	no	yes
YHR015W::chr8_1	YHR015W	MIP6	2.37112	7.63799e-08	yes	yes
YBR077C::chr2_2	YBR077C	SLM4	2.28084	2.32694e-07	no	yes
YDL106C::chr4_2	YDL106C	PHO2	2.27366	2.53806e-07	yes	yes
YNL025C::chr14_4	YNL025C	SSN8	2.21831	4.91013e-07	yes	yes
YDL022W::chr4_1	YDL022W	GPD1	2.20617	5.66291e-07	yes	yes
YER156C::chr00_5	YER156C	YER156C	2.1311	1.34499e-06	yes	yes
YCR020W-B::chr00_1	YCR020W-B	HTL1	2.0256	4.31837e-06	no	yes
YDR195W::chr4_5	YDR195W	REF2	2.00188	5.56858e-06	yes	yes
YGR056W::chr7_4	YGR056W	RSC1	1.98243	6.84578e-06	yes	yes
YLR264W::chr12_4	YLR264W	RPS28B	1.97609	7.319e-06	no	yes
YEL003W::chr5_2	YEL003W	GIM4	1.95989	8.67408e-06	no	yes
YCR081W::chr00_1	YCR081W	SRB8	1.93178	1.16102e-05	no	yes
YDR495C::chr4_8	YDR495C	VPS3	1.90293	1.55949e-05	no	yes
YML033W::chr13_2	YML034W	SRC1	1.84658	2.74126e-05	no	yes
YER074W::chr5_3	YER074W	RPS24A	1.81255	3.8234e-05	no	yes
YGR057C::chr7_4	YGR057C	LST7	1.79582	4.4927e-05	no	yes
YDR439W::chr4_8	YDR439W	LRS4	1.75447	6.65473e-05	no	yes
YPR097W::chr16_4	YPR097W	YPR097W	1.73699	7.83604e-05	yes	yes
YPL239W::chr16_1	YPL239W	YAR1	1.72389	8.84791e-05	no	yes
YLR192C::chr00_11	YLR192C	HCR1	1.6753	0.000137779	no	yes
YEL050C::chr5_2	YEL050C	RML2	1.67193	0.000142003	no	yes
YPR087W::chr16_4	YPR087W	VPS69	1.66588	0.000149915	no	yes
YDR485C::chr4_8	YDR485C	VPS72	1.65578	0.00016404	no	yes
YJR043C::chr00_13	YJR043C	POL32	1.62108	0.000222652	no	yes
YNL307C::chr14_1	YNL307C	MCK1	1.62058	0.000223634	yes	yes
YJL179W::chr10_1	YJL179W	PFD1	1.59248	0.000285103	yes	yes
YLR292C::chr12_4	YLR292C	SEC72	1.58377	0.000307142	no	yes
YGL148W::chr7_2	YGL148W	ARO2	1.58374	0.000307216	yes	yes
YML041C::chr00_11	YML041C	VPS71	1.57733	0.000324455	no	yes
YLR085C::chr12_2	YLR085C	ARP6	1.57125	0.00034161	yes	yes
YPR047W::chr16_4	YPR047W	MSF1	1.56572	0.000357964	no	yes
YJR050W::chr00_13	YJR050W	ISY1	1.53311	0.000470021	yes	yes
YBR106W::chr2_3	YBR106W	PHO88	1.52018	0.000522898	yes	yes
YBR103W::chr2_3	YBR103W	SIF2	1.50712	0.000581787	yes	yes
YOR322C::chr15_4	YOR322C	LDB19	1.49394	0.000647377	yes	yes
YDR174W::chr00_14	YDR174W	HMO1	1.48065	0.000720433	yes	yes
YAL011W::chr1_1	YAL011W	SWC3	1.47032	0.000782361	no	yes
YHL034C::chr8_1	YHL034C	SBP1	1.46775	0.000798515	no	yes
YDR450W::chr4_8	YDR450W	RPS18A	1.46062	0.00084488	no	yes
YOR275C::chr00_17b	YOR275C	RIM20	1.45368	0.000892461	yes	yes
YOL089C::chr00_6	YOL089C	HAL9	1.45252	0.000900614	no	yes
YML061C::chr13_1b	YML061C	PIF1	1.44993	0.000919179	no	yes
YDR477W::chr4_8	YDR477W	SNF1	1.28909	0.00304803	yes	yes
YMR283C::chr13_5	YMR283C	RIT1	1.27366	0.00339651	yes	yes
YNL199C::chr14_2	YNL199C	GCR2	1.26492	0.00360936	yes	yes
YOR140W::chr15_2	YOR140W	SFL1	1.23355	0.00447544	yes	yes
YDR083W::chr4_4	YDR083W	RRP8	1.20149	0.00554815	yes	yes
YJR032W::chr00_13	YJR032W	CPR7	1.14389	0.00805959	yes	yes
YDL122W::chr4_2	YDL122W	UBP1	1.1008	0.0105446	yes	yes
YKR035W-A::chr00_3	YKR035W-A	DID2	1.06561	0.0130451	yes	yes
YNL069C::chr00_18	YNL069C	RPL16B	1.04769	0.0145051	yes	yes
YPL230W::chr16_1	YPL230W	USV1	1.04769	0.0145051	yes	yes
YLR093C::chr12_2	YLR093C	NYV1	1.02954	0.0161246	yes	yes
YLR454W::chr00_4	YLR454W	FMP27	1.02954	0.0161246	yes	yes
YOR024W::chr15_1	YOR024W	YOR024W	0.973687	0.0221142	yes	yes
YKL117W::chr11_2	YKL117W	SBA1	0.954578	0.0245541	yes	yes
YLR025W::chr12_1	YLR025W	SNF7	0.924322	0.028877	yes	yes
YHR111W::chr8_2	YHR111W	UBA4	0.915584	0.0302372	yes	yes
YLL019C::chr12_1	YLL019C	KNS1	0.914407	0.0304245	yes	yes
YIL090W::chr9_1	YIL090W	ICE2	0.914407	0.0304245	yes	yes
YDR207C::chr4_5	YDR207C	UME6	0.895685	0.0335339	yes	yes
YOR274W::chr00_17b	YOR274W	MOD5	0.895685	0.0335339	yes	yes
YGL031C::chr7_1	YGL031C	RPL24A	0.875507	0.0371732	yes	yes
YNL134C::chr14_3	YNL134C	YNL134C	0.855043	0.0411875	yes	yes
YDL218W::chr4_3	YDL218W	YDL218W	0.834284	0.0456117	yes	yes
YGR004W::chr7_3	YGR004W	PEX31	0.834284	0.0456117	yes	yes
YDR444W::chr00_17a	YDR444W	YDR444W	0.813223	0.050483	yes	yes
YGR064W::chr7_4	YGR064W	YGR064W	0.791849	0.0558414	yes	yes
YNL072W::chr00_16b	YNL072W	RNH201	0.791849	0.0558414	yes	yes
YIL103W::chr9_2	YIL103W	DPH1	0.770154	0.0617295	yes	yes
YMR175W::chr00_4	YMR175W	SIP18	0.770154	0.0617295	yes	yes
YNL032W::chr14_4	YNL032W	SIW14	0.748128	0.0681924	yes	yes
YLR360W::chr12_5	YLR360W	VPS38	0.72576	0.0752776	yes	yes
YNL273W::chr14_1	YNL273W	TOF1	0.72576	0.0752776	yes	yes
YIL035C::chr9_1	YIL035C	CKA1	0.688694	0.0882346	yes	yes
YNL001W::chr14_4	YNL001W	DOM34	0.679956	0.0915181	yes	yes
YOR139C::chr15_2	YOR139C	YOR139C	0.677012	0.0926445	yes	yes
YAL012W::chr00_12	YAL012W	CYS3	0.656497	0.10078	yes	yes
YOR076C::chr15_1	YOR076C	SKI7	0.641388	0.107096	yes	yes
YDL002C::chr4_1	YDL002C	NHP10	0.629315	0.112345	yes	yes
YHL027W::chr8_1	YHL027W	RIM101	0.592479	0.129488	yes	yes
YBL068W::chr2_1	YBL068W	PRS4	0.583741	0.133807	yes	yes
YOL001W::chr15_5	YOL001W	PHO80	0.583741	0.133807	yes	yes
YOL041C::chr15_5	YOL041C	NOP12	0.583741	0.133807	yes	yes
YGL132W::chr7_2	YGL132W	YGL132W	0.579988	0.135692	yes	yes
YGL164C::chr7_2	YGL164C	YRB30	0.507119	0.175908	yes	yes
YKR017C::chr11_3	YKR017C	YKR017C	0.507119	0.175908	yes	yes
YJR053W::chr00_13	YJR053W	BFA1	0.480647	0.192219	yes	yes
YMR080C::chr00_6	YMR080C	NAM7	0.480647	0.192219	yes	yes
YCL008C::chr3_1	YCL008C	STP22	0.480647	0.192219	yes	yes
YBR267W::chr2_4	YBR267W	REI1	0.475965	0.195198	yes	yes
YDR042C::chr4_3	YDR042C	YDR042C	0.475965	0.195198	yes	yes
YOL115W::chr00_6	YOL115W	PAP2	0.45368	0.209754	yes	yes
YDR511W::chr4_8	YDR511W	ACN9	0.426199	0.228555	yes	yes
YPL071C::chr16_3	YPL071C	YPL071C	0.426199	0.228555	yes	yes
YLR322W::chr12_4	YLR322W	VPS65	0.398185	0.248659	yes	yes
YGL124C::chr7_2	YGL124C	MON1	0.398185	0.248659	yes	yes
YMR127C::chr00_9	YMR127C	SAS2	0.369616	0.270092	yes	yes
YOL006C::chr15_5	YOL006C	TOP1	0.369616	0.270092	yes	yes
YOR243C::chr15_3	YOR243C	PUS7	0.369616	0.270092	yes	yes
YBR246W::chr2_4	YBR246W	RRT2	0.349208	0.28595	yes	yes
YCR004C::chr3_1	YCR004C	YCP4	0.34047	0.292872	yes	yes
YHR105W::chr8_2	YHR105W	YPT35	0.310722	0.317001	yes	yes
YNL143C::chr14_3	YNL143C	YNL143C	0.249322	0.369242	yes	yes
YOR277C::chr15_3	YOR277C	YOR277C	0.242292	0.375403	yes	yes
YGL205W::chr7_3	YGL205W	POX1	0.217613	0.397276	yes	yes
YLL043W::chr12_1	YLL043W	FPS1	0.143889	0.464296	yes	yes
YPR023C::chr00_15	YPR023C	EAF3	0.118077	0.488104	yes	yes
YJR056C::chr00_13	YJR056C	YJR056C	0.0476879	0.552999	yes	yes
YJR082C::chr10_4	YJR082C	EAF6	0.011162	0.58623	yes	yes
YDR048C::chr00_16b	YDR048C	YDR048C	0.011162	0.58623	yes	yes

## Sheet: flight-ground processes 14G
GO process	Query set fraction	Process fraction	Fold enrichment	P	FDR	Overlap genes
REGULATION OF DNA-DEPENDENT DNA REPLICATION	0.014652	0.363636	5.03097	0.0058674	1	MHR1(1.89)|TOF1(0.73)|SIN3(0.41)|EAF3(0.12)
REGULATION OF TRANSLATION	0.03663	0.175439	2.42722	0.0068118	1	AEP2(1.8)|EFT2(1.64)|SBP1(1.58)|SSD1(1.44)|MTQ1(1.15)|FES1(1.08)|RPL31B(0.97)|MBA1(0.77)|PET309(0.56)|NPL3(0.48)
CELLULAR RESPONSE TO HEAT	0.021978	0.24	3.32044	0.00740028	1	SHO1(3.28)|MSN1(0.95)|SDS3(0.53)|SIN3(0.41)|NMA111(0.34)|NUP84(0.3)

## Sheet: flight-ground processes 21G
GO process	Query set fraction	Process fraction	Fold enrichment	P	FDR	Overlap genes
HISTONE EXCHANGE	0.0438596	0.833333	27.6096	1.35e-07	0.000132585	VPS72(1.66)|VPS71(1.58)|ARP6(1.57)|SWC3(1.47)|SAS2(0.37)
CHROMATIN REMODELING	0.0789474	0.28125	9.31826	2.37e-07	0.000132585	PHO2(2.27)|HTL1(2.03)|RSC1(1.98)|VPS72(1.66)|VPS71(1.58)|ARP6(1.57)|SWC3(1.47)|NHP10(0.63)|SAS2(0.37)
ATP-DEPENDENT CHROMATIN REMODELING	0.0526316	0.545455	18.0718	2.71e-07	0.000132585	RSC1(1.98)|VPS72(1.66)|VPS71(1.58)|ARP6(1.57)|SWC3(1.47)|SAS2(0.37)
NUCLEOSOME ORGANIZATION	0.0701754	0.307692	10.1943	5.35e-07	0.000196275	HTL1(2.03)|RSC1(1.98)|VPS72(1.66)|VPS71(1.58)|ARP6(1.57)|SWC3(1.47)|NHP10(0.63)|SAS2(0.37)
CHROMATIN ORGANIZATION	0.131579	0.125	4.14145	2.08e-06	0.000610225	PHO2(2.27)|HTL1(2.03)|RSC1(1.98)|VPS72(1.66)|VPS71(1.58)|ARP6(1.57)|SIF2(1.51)|HMO1(1.48)|SWC3(1.47)|UME6(0.9)|NHP10(0.63)|SAS2(0.37)|TOP1(0.37)|EAF3(0.12)|EAF6(0.01)
CHROMATIN MODIFICATION	0.114035	0.128713	4.26446	7.59e-06	0.00177269	PHO2(2.27)|HTL1(2.03)|RSC1(1.98)|VPS72(1.66)|VPS71(1.58)|ARP6(1.57)|SIF2(1.51)|SWC3(1.47)|UME6(0.9)|NHP10(0.63)|SAS2(0.37)|EAF3(0.12)|EAF6(0.01)
NEGATIVE REGULATION OF MACROMOLECULE METABOLIC PROCESS	0.149123	0.100592	3.33276	8.7e-06	0.00177269	SSN8(2.22)|SRB8(1.93)|LRS4(1.75)|SIF2(1.51)|SBP1(1.47)|PIF1(1.45)|SNF1(1.29)|SFL1(1.23)|UME6(0.9)|TOF1(0.73)|RIM101(0.59)|PHO80(0.58)|NAM7(0.48)|SAS2(0.37)|TOP1(0.37)|YCP4(0.34)|EAF3(0.12)
NEGATIVE REGULATION OF MACROMOLECULE BIOSYNTHETIC PROCESS	0.140351	0.103896	3.44224	1.09e-05	0.00177269	SSN8(2.22)|SRB8(1.93)|LRS4(1.75)|SIF2(1.51)|SBP1(1.47)|PIF1(1.45)|SNF1(1.29)|UME6(0.9)|TOF1(0.73)|RIM101(0.59)|PHO80(0.58)|NAM7(0.48)|SAS2(0.37)|TOP1(0.37)|YCP4(0.34)|EAF3(0.12)
NEGATIVE REGULATION OF CELLULAR MACROMOLECULE BIOSYNTHETIC PROCESS	0.140351	0.103896	3.44224	1.09e-05	0.00177269	SSN8(2.22)|SRB8(1.93)|LRS4(1.75)|SIF2(1.51)|SBP1(1.47)|PIF1(1.45)|SNF1(1.29)|UME6(0.9)|TOF1(0.73)|RIM101(0.59)|PHO80(0.58)|NAM7(0.48)|SAS2(0.37)|TOP1(0.37)|YCP4(0.34)|EAF3(0.12)
NEGATIVE REGULATION OF BIOSYNTHETIC PROCESS	0.140351	0.0958084	3.17428	3.05e-05	0.00407096	SSN8(2.22)|SRB8(1.93)|LRS4(1.75)|SIF2(1.51)|SBP1(1.47)|PIF1(1.45)|SNF1(1.29)|UME6(0.9)|TOF1(0.73)|RIM101(0.59)|PHO80(0.58)|NAM7(0.48)|SAS2(0.37)|TOP1(0.37)|YCP4(0.34)|EAF3(0.12)
NEGATIVE REGULATION OF CELLULAR BIOSYNTHETIC PROCESS	0.140351	0.0958084	3.17428	3.05e-05	0.00407096	SSN8(2.22)|SRB8(1.93)|LRS4(1.75)|SIF2(1.51)|SBP1(1.47)|PIF1(1.45)|SNF1(1.29)|UME6(0.9)|TOF1(0.73)|RIM101(0.59)|PHO80(0.58)|NAM7(0.48)|SAS2(0.37)|TOP1(0.37)|YCP4(0.34)|EAF3(0.12)
NEGATIVE REGULATION OF NUCLEOBASE-CONTAINING COMPOUND METABOLIC PROCESS	0.122807	0.0939597	3.11303	0.000123682	0.0139666	SSN8(2.22)|SRB8(1.93)|LRS4(1.75)|SIF2(1.51)|PIF1(1.45)|UME6(0.9)|TOF1(0.73)|RIM101(0.59)|PHO80(0.58)|NAM7(0.48)|SAS2(0.37)|TOP1(0.37)|YCP4(0.34)|EAF3(0.12)
NEGATIVE REGULATION OF NITROGEN COMPOUND METABOLIC PROCESS	0.122807	0.0939597	3.11303	0.000123682	0.0139666	SSN8(2.22)|SRB8(1.93)|LRS4(1.75)|SIF2(1.51)|PIF1(1.45)|UME6(0.9)|TOF1(0.73)|RIM101(0.59)|PHO80(0.58)|NAM7(0.48)|SAS2(0.37)|TOP1(0.37)|YCP4(0.34)|EAF3(0.12)
NEGATIVE REGULATION OF GENE EXPRESSION	0.114035	0.0935252	3.09864	0.000230028	0.0241201	SSN8(2.22)|SRB8(1.93)|LRS4(1.75)|SIF2(1.51)|SFL1(1.23)|UME6(0.9)|RIM101(0.59)|PHO80(0.58)|NAM7(0.48)|SAS2(0.37)|TOP1(0.37)|YCP4(0.34)|EAF3(0.12)
RNA CATABOLIC PROCESS	0.0614035	0.145833	4.83169	0.000501447	0.049075	LSM7(2.61)|POL32(1.62)|RNH201(0.79)|DOM34(0.68)|SKI7(0.64)|NAM7(0.48)|PAP2(0.45)
MITOTIC SISTER CHROMATID SEGREGATION	0.0438596	0.208333	6.90241	0.000615951	0.0564342	SRC1(1.85)|LRS4(1.75)|MCK1(1.62)|TOF1(0.73)|TOP1(0.37)
NEGATIVE REGULATION OF TRANSCRIPTION, DNA-DEPENDENT	0.105263	0.0882353	2.92337	0.000691972	0.0564342	SSN8(2.22)|SRB8(1.93)|LRS4(1.75)|SIF2(1.51)|UME6(0.9)|RIM101(0.59)|PHO80(0.58)|NAM7(0.48)|SAS2(0.37)|TOP1(0.37)|YCP4(0.34)|EAF3(0.12)
NEGATIVE REGULATION OF RNA METABOLIC PROCESS	0.105263	0.0882353	2.92337	0.000691972	0.0564342	SSN8(2.22)|SRB8(1.93)|LRS4(1.75)|SIF2(1.51)|UME6(0.9)|RIM101(0.59)|PHO80(0.58)|NAM7(0.48)|SAS2(0.37)|TOP1(0.37)|YCP4(0.34)|EAF3(0.12)
TRANSCRIPTION ELONGATION FROM RNA POLYMERASE II PROMOTER	0.0350877	0.266667	8.83509	0.000830748	0.0599801	HTL1(2.03)|RSC1(1.98)|TOP1(0.37)|EAF3(0.12)
RRNA CATABOLIC PROCESS	0.0263158	0.428571	14.1992	0.000858027	0.0599801	DOM34(0.68)|SKI7(0.64)|PAP2(0.45)
NCRNA CATABOLIC PROCESS	0.0263158	0.428571	14.1992	0.000858027	0.0599801	DOM34(0.68)|SKI7(0.64)|PAP2(0.45)
SISTER CHROMATID SEGREGATION	0.0438596	0.192308	6.37146	0.000908353	0.0606119	SRC1(1.85)|LRS4(1.75)|MCK1(1.62)|TOF1(0.73)|TOP1(0.37)
NUCLEAR DIVISION	0.0701754	0.112676	3.73314	0.00117216	0.071697	SRC1(1.85)|LRS4(1.75)|MCK1(1.62)|TOF1(0.73)|DOM34(0.68)|BFA1(0.48)|PAP2(0.45)|TOP1(0.37)
MITOSIS	0.0701754	0.112676	3.73314	0.00117216	0.071697	SRC1(1.85)|LRS4(1.75)|MCK1(1.62)|TOF1(0.73)|DOM34(0.68)|BFA1(0.48)|PAP2(0.45)|TOP1(0.37)
TRANSCRIPTION ELONGATION, DNA-DEPENDENT	0.0350877	0.235294	7.79567	0.00138232	0.0811697	HTL1(2.03)|RSC1(1.98)|TOP1(0.37)|EAF3(0.12)
TRNA PROCESSING	0.0614035	0.122807	4.06879	0.00143917	0.0812577	LSM7(2.61)|MSF1(1.57)|RIT1(1.27)|UBA4(0.92)|MOD5(0.9)|PAP2(0.45)|PUS7(0.37)
DNA REPLICATION	0.0614035	0.118644	3.93087	0.00176697	0.096071	POL32(1.62)|PIF1(1.45)|SBA1(0.95)|RNH201(0.79)|TOF1(0.73)|TOP1(0.37)|EAF3(0.12)
DNA STRAND ELONGATION INVOLVED IN DNA REPLICATION	0.0263158	0.333333	11.0439	0.00196994	0.0975938	POL32(1.62)|RNH201(0.79)|TOP1(0.37)
RNA-DEPENDENT DNA REPLICATION	0.0263158	0.333333	11.0439	0.00196994	0.0975938	POL32(1.62)|PIF1(1.45)|SBA1(0.95)
ORGANELLE FISSION	0.0701754	0.103896	3.44224	0.00199442	0.0975938	SRC1(1.85)|LRS4(1.75)|MCK1(1.62)|TOF1(0.73)|DOM34(0.68)|BFA1(0.48)|PAP2(0.45)|TOP1(0.37)
LATE ENDOSOME TO VACUOLE TRANSPORT	0.0350877	0.2	6.62632	0.00262381	0.12425	DID2(1.07)|SNF7(0.92)|VPS38(0.73)|STP22(0.48)
M PHASE OF MITOTIC CELL CYCLE	0.0701754	0.097561	3.23235	0.00298051	0.136731	SRC1(1.85)|LRS4(1.75)|MCK1(1.62)|TOF1(0.73)|DOM34(0.68)|BFA1(0.48)|PAP2(0.45)|TOP1(0.37)
REGULATION OF DNA REPLICATION	0.0350877	0.190476	6.31078	0.00316657	0.13686	PIF1(1.45)|SBA1(0.95)|TOF1(0.73)|EAF3(0.12)
NUCLEAR-TRANSCRIBED MRNA CATABOLIC PROCESS	0.0438596	0.147059	4.87229	0.00316979	0.13686	LSM7(2.61)|DOM34(0.68)|SKI7(0.64)|NAM7(0.48)|PAP2(0.45)
DNA-DEPENDENT DNA REPLICATION	0.0438596	0.142857	4.73308	0.00361043	0.150964	POL32(1.62)|RNH201(0.79)|TOF1(0.73)|TOP1(0.37)|EAF3(0.12)
DNA STRAND ELONGATION	0.0263158	0.272727	9.03589	0.00370212	0.150964	POL32(1.62)|RNH201(0.79)|TOP1(0.37)
MRNA CATABOLIC PROCESS	0.0438596	0.138889	4.60161	0.00409344	0.16241	LSM7(2.61)|DOM34(0.68)|SKI7(0.64)|NAM7(0.48)|PAP2(0.45)
PEPTIDYL-AMINO ACID MODIFICATION	0.0526316	0.115385	3.82287	0.00434752	0.167951	CPR7(1.14)|DPH1(0.77)|SAS2(0.37)|RRT2(0.35)|EAF3(0.12)|EAF6(0.01)
POSITIVE REGULATION OF NUCLEOBASE-CONTAINING COMPOUND METABOLIC PROCESS	0.0964912	0.0733333	2.42965	0.00506819	0.185483	PHO2(2.27)|SSN8(2.22)|SRB8(1.93)|SIF2(1.51)|HAL9(1.45)|GCR2(1.26)|SFL1(1.23)|USV1(1.05)|SBA1(0.95)|UME6(0.9)|RIM101(0.59)
REGULATION OF DNA METABOLIC PROCESS	0.0438596	0.131579	4.35942	0.00519524	0.185483	PIF1(1.45)|SBA1(0.95)|TOF1(0.73)|TOP1(0.37)|EAF3(0.12)
CELLULAR MACROMOLECULAR COMPLEX DISASSEMBLY	0.0350877	0.166667	5.52193	0.00524338	0.185483	HTL1(2.03)|RSC1(1.98)|DOM34(0.68)|NAM7(0.48)
MRNA METABOLIC PROCESS	0.0701754	0.0888889	2.94503	0.00530674	0.185483	LSM7(2.61)|REF2(2)|ISY1(1.53)|DOM34(0.68)|SKI7(0.64)|NAM7(0.48)|PAP2(0.45)|PUS7(0.37)
TRNA METABOLIC PROCESS	0.0614035	0.0972222	3.22113	0.00552751	0.186875	LSM7(2.61)|MSF1(1.57)|RIT1(1.27)|UBA4(0.92)|MOD5(0.9)|PAP2(0.45)|PUS7(0.37)
POSITIVE REGULATION OF NITROGEN COMPOUND METABOLIC PROCESS	0.0964912	0.0723684	2.39768	0.00560117	0.186875	PHO2(2.27)|SSN8(2.22)|SRB8(1.93)|SIF2(1.51)|HAL9(1.45)|GCR2(1.26)|SFL1(1.23)|USV1(1.05)|SBA1(0.95)|UME6(0.9)|RIM101(0.59)
CELLULAR RESPONSE TO ABIOTIC STIMULUS	0.0350877	0.16	5.30105	0.00609896	0.191782	GPD1(2.21)|RIM20(1.45)|USV1(1.05)|RIM101(0.59)
CELLULAR COMPONENT DISASSEMBLY AT CELLULAR LEVEL	0.0350877	0.16	5.30105	0.00609896	0.191782	HTL1(2.03)|RSC1(1.98)|DOM34(0.68)|NAM7(0.48)
CARBON CATABOLITE ACTIVATION OF TRANSCRIPTION	0.0263158	0.230769	7.64575	0.00614016	0.191782	SSN8(2.22)|SRB8(1.93)|USV1(1.05)
MACROMOLECULAR COMPLEX DISASSEMBLY	0.0350877	0.153846	5.09717	0.0070427	0.198603	HTL1(2.03)|RSC1(1.98)|DOM34(0.68)|NAM7(0.48)
RIBOSOMAL SMALL SUBUNIT BIOGENESIS	0.0438596	0.121951	4.04044	0.00721954	0.198603	LSM7(2.61)|RPS24A(1.81)|YAR1(1.72)|HCR1(1.68)|RPS18A(1.46)
POSITIVE REGULATION OF MACROMOLECULE BIOSYNTHETIC PROCESS	0.0964912	0.0691824	2.29212	0.00782493	0.198603	PHO2(2.27)|SSN8(2.22)|SRB8(1.93)|SIF2(1.51)|HAL9(1.45)|GCR2(1.26)|SFL1(1.23)|USV1(1.05)|SBA1(0.95)|UME6(0.9)|RIM101(0.59)
CELLULAR COMPONENT DISASSEMBLY	0.0350877	0.148148	4.90838	0.00807826	0.198603	HTL1(2.03)|RSC1(1.98)|DOM34(0.68)|NAM7(0.48)
POSITIVE REGULATION OF TRANSCRIPTION, DNA-DEPENDENT	0.0877193	0.0724638	2.40084	0.00811233	0.198603	PHO2(2.27)|SSN8(2.22)|SRB8(1.93)|SIF2(1.51)|HAL9(1.45)|GCR2(1.26)|SFL1(1.23)|USV1(1.05)|UME6(0.9)|RIM101(0.59)
NUCLEAR-TRANSCRIBED MRNA CATABOLIC PROCESS, EXONUCLEOLYTIC	0.0175439	0.4	13.2526	0.00850819	0.198603	SKI7(0.64)|NAM7(0.48)
MITOTIC CHROMOSOME CONDENSATION	0.0175439	0.4	13.2526	0.00850819	0.198603	LRS4(1.75)|TOP1(0.37)
REGULATION OF TRANSCRIPTION FROM RNA POLYMERASE II PROMOTER DURING MEIOSIS	0.0175439	0.4	13.2526	0.00850819	0.198603	SSN8(2.22)|UME6(0.9)
SNORNA METABOLIC PROCESS	0.0175439	0.4	13.2526	0.00850819	0.198603	REF2(2)|PAP2(0.45)
PEPTIDYL-HISTIDINE MODIFICATION	0.0175439	0.4	13.2526	0.00850819	0.198603	DPH1(0.77)|RRT2(0.35)
DNA REPLICATION, OKAZAKI FRAGMENT PROCESSING	0.0175439	0.4	13.2526	0.00850819	0.198603	POL32(1.62)|RNH201(0.79)
NUCLEAR-TRANSCRIBED MRNA CATABOLIC PROCESS, EXONUCLEOLYTIC, 3'-5'	0.0175439	0.4	13.2526	0.00850819	0.198603	SKI7(0.64)|NAM7(0.48)
EXONUCLEOLYTIC NUCLEAR-TRANSCRIBED MRNA CATABOLIC PROCESS INVOLVED IN DEADENYLATION-DEPENDENT DECAY	0.0175439	0.4	13.2526	0.00850819	0.198603	SKI7(0.64)|NAM7(0.48)
REGULATION OF RIBOSOMAL PROTEIN GENE TRANSCRIPTION FROM RNA POLYMERASE II PROMOTER	0.0175439	0.4	13.2526	0.00850819	0.198603	HMO1(1.48)|GCR2(1.26)
NUCLEAR-TRANSCRIBED MRNA CATABOLIC PROCESS, 3'-5' EXONUCLEOLYTIC NONSENSE-MEDIATED DECAY	0.0175439	0.4	13.2526	0.00850819	0.198603	SKI7(0.64)|NAM7(0.48)
POSITIVE REGULATION OF GENE EXPRESSION	0.0877193	0.0719424	2.38357	0.00852317	0.198603	PHO2(2.27)|SSN8(2.22)|SRB8(1.93)|SIF2(1.51)|HAL9(1.45)|GCR2(1.26)|SFL1(1.23)|USV1(1.05)|UME6(0.9)|RIM101(0.59)
RESPONSE TO NUTRIENT	0.0350877	0.142857	4.73308	0.00920909	0.207925	SSN8(2.22)|SRB8(1.93)|USV1(1.05)|UME6(0.9)
CELLULAR RESPONSE TO NUTRIENT	0.0350877	0.142857	4.73308	0.00920909	0.207925	SSN8(2.22)|SRB8(1.93)|USV1(1.05)|UME6(0.9)
REGULATION OF PH	0.0263158	0.2	6.62632	0.00934814	0.207925	VPS3(1.9)|RIM20(1.45)|RIM101(0.59)
