# Supplementary material for: Genes Required for Survival in Microgravity Revealed by Genome-Wide Yeast Deletion Collections Cultured during Spaceflight
Source: Biomed Res Int. 2015 Jan 13;2015:976458. doi: 10.1155/2015/976458 (PMC4309212; doi:10.1155/2015/976458)
Supplement: Supplementary file 1 — Supplementary tables 1 and 2 provide the Illumina sequencing counts for each barcode/strain of each sample following mean normalization for the homozygous strains (Supplementary Table S1) and the heterozygous deletion strains (Supplementary Table S2). Supplementary tables 3 and 4 list those strains in the homozygous deletion collection (Supplementary Table S3) and the heterozygous deletion collection (Supplementary Table S4) that were excluded from the analysis for technical reasons. Supplementary tables 5 and 6 contain the results from the analysis of the homozygous deletion collection, comparing ground experiments to flight experiments in YPD media (Supplementary Table S5) and in YPD media + 0.5M NaCl (Supplementary Table S6). Supplementary table S7 contains the concordance in GO enrichments of the experiments presented in this study to a compendium of published data (reference 13). Supplementary tables 8 and 9 contain the results from the analysis of the heterozygous deletion collection, comparing ground experiments to flight experiments in YPD media (Supplementary Table S8) and in YPD media + 0.5M NaCl (Supplementary Table S9). [file 976458.f1.zip › TableS7_GOBPv4EnrichmentBasedSim-HIPHOPcompendiumV3.xlsx]

## Sheet: README
Table S7. Similarities between flight-associated genes and compound-associated genes.
Flight-associated and compound-associated genes (PMID 24723613) were separately assessed for Gene Ontology biological process enrichment (see Methods), resulting in an "enrichment profile" for each condition of interest. In each profile, each process is associated with a P measuring the significance of enrichment. Similarity between enrichment profiles was computed by concordance of -log10(P), wh…
Column	Description
Screen ID	unique ID assigned to a chemogenomic screen
Condition	name of the compound screened, and any other information on the screen condition
Description	brief description of the mechanism of the screened compound where available, not meant to be comprehensive
flight-ground, 21G vs. 14G, het	concordances between compound profiles and profiles for flight-associated genes detected at 21 vs. 14 generations, from heterozygous pool samples
flight-ground, 14G vs. 7G, het+NaCl	concordances between compound profiles and profiles for flight-associated genes detected at 14 vs. 7 generations, from heterozygous pool samples grown in NaCl
flight-ground, 21G vs. 7G, het+NaCl	concordances between compound profiles and profiles for flight-associated genes detected at 21 vs. 7 generations, from heterozygous pool samples grown in NaCl
flight-ground, 14G vs. 7G, hom	concordances between compound profiles and profiles for flight-associated genes detected at 14 vs. 7 generations, from homozygous pool samples
flight-ground, 21G vs. 7G, hom	concordances between compound profiles and profiles for flight-associated genes detected at 21 vs. 7 generations, from homozygous pool samples
flight-ground, 14G vs. 7G, hom+NaCl	concordances between compound profiles and profiles for flight-associated genes detected at 14 vs. 7 generations, from homozygous pool samples grown in NaCl
flight-ground, 21G vs. 7G, hom+NaCl	concordances between compound profiles and profiles for flight-associated genes detected at 21 vs. 7 generations, from homozygous pool samples grown in NaCl

## Sheet: concordance
Screen ID	Condition	Description	flight-ground, 21G vs. 14G, het	flight-ground, 14G vs. 7G, het+NaCl	flight-ground, 21G vs. 7G, het+NaCl	flight-ground, 14G vs. 7G, hom	flight-ground, 21G vs. 7G, hom	flight-ground, 14G vs. 7G, hom+NaCl	flight-ground, 21G vs. 7G, hom+NaCl	flight-ground, 21G vs. 14G, het
SGTC_2674	ligustilide	A signalling regulator.	0.317327	-0.00749549	0.102726	0.00745341	0.11857	0.159116	0.0739167
SGTC_1441	4106-0040		0.315734	0.0860666	0.0570968	-0.00413027	0.130947	0.207589	0.0557233
SGTC_2971	9092186		0.31261	-0.00830457	0.06575	0.108047	0.00957924	0.074558	0.164103
SGTC_2315	7733312		0.309121	-0.0145928	0.0690326	0.0262854	0.270257	0.152847	0.0351785
SGTC_1031	k035-0009		0.308375	0.0408559	0.106353	0.00596755	0.155948	0.19966	0.129111
SGTC_335	4077-0256		0.305868	0.146361	0.0847124	0.0468566	0.23589	0.0963536	0.085405
SGTC_1107	amlodipine	Amlodipine is a dihydropyridine calcium antagonist (calcium ion antagonist or slow-channel blocker) that inhibits the transmembrane influx of calcium ions into vascular smooth muscle and cardiac muscle.	0.305599	0.0620072	0.190765	0.0805563	0.197372	0.0787239	0.000661188
SGTC_33	0986-0033		0.305345	0.13201	0.0994012	0.108123	0.329528	0.0713007	0.0739791
SGTC_5	0352-0601		0.301688	0.00524286	-0.0217079	0.129907	0.0564921	0.131582	0.0977377
SGTC_940	3232-1287		0.289564	0.0577867	0.200275	0.0947844	0.130583	0.108991	0.0125475
SGTC_2417	cerulenin	Cerulenin, an antibiotic and antifungal, is an inhibitor of fatty acid biosynthesis.	0.28831	0.0175029	0.00561024	-0.0328284	0.120714	0.246804	0.215977
SGTC_126	0417-1624		0.281514	-0.00548991	0.0330517	0.08699	0.105528	0.121198	0.148035
SGTC_2000	st075254		0.279261	0.0857999	0.0643998	0.170709	0.000604635	0.0605531	0.0278898
SGTC_2785	7756463		0.277782	0.0963316	0.00556042	0.0803016	0.191666	0.219478	0.151654
SGTC_735	3076-0345		0.267287	0.0778082	0.0461807	-0.0250761	0.161998	0.111235	0.0489369
SGTC_2136	5328288		0.2663	-0.0399442	0.0164907	-0.0259322	0.125158	0.215821	0.0686606
SGTC_1182	1222-0449		0.261079	0.0805565	0.118058	0.0212663	0.0724138	0.0208225	0.0170301
SGTC_309	k408-0051		0.260478	0.023006	0.0513132	-0.00135032	0.376173	0.103156	0.136255
SGTC_1769	st044406		0.260005	0.0464079	0.0497049	0.0156502	0.308567	0.144967	0.151538
SGTC_518	1021-0119		0.259832	0.00947919	0.0302769	0.0626491	0.10058	0.288825	0.142922
SGTC_1815	st051655		0.257774	0.0401785	-0.0244227	0.00130753	0.0433582	0.0255297	0.0209034
SGTC_1681	tripelennamine	Tripelennamine acts primarily as anÂ antihistamine, orÂ H1Â receptorÂ antagonist.	0.255251	0.035105	0.129771	0.034289	0.20339	0.153657	0.0334432
SGTC_3346	9158254		0.251825	0.0499129	-0.0376048	0.0449861	0.185531	0.152748	0.28578
SGTC_1466	k213-0079		0.25012	0.026778	0.0865892	0.152537	0.266787	0.0427133	0.161744
SGTC_545	4218-0007		0.248768	-0.000196266	0.0802428	0.0156786	0.180232	0.161337	0.0716999
SGTC_2546	rhodinyl acetate		0.247264	0.00699646	-0.0400214	0.0476415	0.0609277	0.147464	0.0814396
SGTC_1894	3',6'-dihydroxyflavone		0.245923	0.043858	0.0106546	0.0342345	0.100342	0.121128	0.0703273
SGTC_1960	st011366		0.245158	0.117701	0.0232085	-0.00314377	0.0530826	0.185273	0.0661253
SGTC_2512	diallyl trisulfide	Antifungal agent Antilipemic agent Antioxidant Antiprotozoal agent Insecticide Platelet aggregation inhibitor Spermatocidal agent	0.244069	0.102087	0.0203144	-0.0176889	0.194435	0.202251	0.120887
SGTC_2964	9083345		0.243699	-0.00198761	0.064934	0.0601408	0.235265	0.138285	0.0872198
SGTC_625	k213-0058		0.239215	0.0341048	0.0785995	0.0290725	0.585001	0.0583668	0.105491
SGTC_2576	guaiol		0.238074	0.0106277	0.101053	-0.0241862	0.133082	0.0523753	0.0618225
SGTC_104	0074-0074		0.237893	0.117316	-0.0507577	0.145606	0.185263	0.0862091	0.102143
SGTC_969	1313-0238		0.235046	0.127766	0.014722	0.011026	0.0975397	0.174591	0.133531
SGTC_851	0394-0702		0.233623	0.141894	0.0690525	-0.00922784	0.108072	0.0945554	0.155771
SGTC_1966	st070145		0.230747	0.0448183	0.0469184	0.0529746	0.243351	0.0638512	0.0477371
SGTC_145	3737-0113		0.230617	-0.00589315	0.0416992	0.0571417	0.0526415	0.0477893	0.171642
SGTC_2510	benzyl isothiocyanate	DNA damaging agent; causes G2/M arrest.	0.230453	0.0394334	-0.0199477	-0.00259526	0.0944275	0.0592922	0.281248
SGTC_2212	7123476		0.22761	0.135043	0.246104	-0.049536	0.0436023	0.240864	0.0941359
SGTC_2041	5107442		0.226869	0.0265266	0.0033257	0.0308522	0.12313	0.0570943	0.215304
SGTC_1896	st058441		0.225242	-0.0355645	0.0110911	-0.0460777	0.0934953	0.17683	0.137882
SGTC_2771	fluoxetine	A selective serotonin reuptake inhibitor.	0.22413	0.00330292	-0.0544797	0.116825	0.0252675	0.103931	0.220367
SGTC_1901	st060216		0.223017	-0.0109914	0.0188057	0.0139145	0.135059	0.122392	0.0627143
SGTC_2252	omeprazole	A proton pump inhibitor.	0.222464	0.0633477	0.0468238	0.184348	0.185509	0.054301	0.101497
SGTC_1038	k292-0204		0.220703	0.0132857	-0.029605	0.160406	0.144443	0.0965475	0.148866
SGTC_2246	7293507		0.220334	0.00377649	-0.0255256	0.130415	-0.0568528	-0.00116897	0.0123128
SGTC_115	0527-0192		0.220221	0.0224148	0.0147662	0.0382825	0.0592259	0.120349	0.108385
SGTC_404	fumagillin	A methionine aminopeptidase binder.	0.219691	0.0303365	0.212965	-0.0730609	0.115757	0.13384	0.0168399
SGTC_998	3996-0085		0.218923	0.0698146	0.0275379	0.0100714	0.00746246	0.0905419	0.0260889
SGTC_994	3910-0338		0.216911	0.0516436	-0.0484298	0.0394285	0.0621532	0.144737	0.149813
SGTC_3262	9137218		0.216333	-0.0246266	0.028864	0.00729164	0.0508323	0.10119	0.0441169
SGTC_679	0422-0091		0.216329	0.111841	0.0136873	0.0588293	0.197534	0.0801848	0.230124
SGTC_2	0422-0095		0.215902	0.00227665	0.0691532	0.0566452	0.0957383	0.126788	0.0182493
SGTC_1252	0493-0875		0.214533	0.101336	-0.0365765	-0.023935	0.203883	0.141789	0.0179435
SGTC_831	k061-1017		0.214464	0.188744	0.025874	0.0727167	0.294275	0.0511993	0.0963959
SGTC_2285	7945142		0.21401	-0.00427669	0.0115431	0.153219	0.0687285	0.0438136	0.0150015
SGTC_1784	st039334		0.212804	0.0378215	0.00421904	-0.049839	0.0709754	0.138451	0.00631651
SGTC_1647	st011722		0.21273	0.216221	0.0232434	0.147354	0.115876	0.0471061	0.0865742
SGTC_2628	lathosterol		0.212354	0.191281	0.104242	-0.0256148	0.157148	0.0868332	0.101796
SGTC_1613	st002381		0.21234	0.0896548	-0.017257	-0.0432282	0.13332	0.112121	0.0690809
SGTC_493	zm226600	A potassium channel opener.	0.212293	-0.0335223	0.0209442	0.00337317	0.0510339	0.0695701	0.139723
SGTC_1438	4092-1045		0.211824	0.0716805	0.0183094	0.0103672	0.202034	0.120691	0.108745
SGTC_2762	leflunomide	A prodrug with immunosuppresive properties, leflunomide is converted to an active metabolite that inhibits dihydroorotate dehydrogenase, a key enzyme of de novo pyrimidine synthesis. This agent also inhibits various protein tyrosine kinases, such as protein kinase C (PKC).	0.210652	0.222802	0.148044	-0.040859	0.0387203	0.08083	0.0763094
SGTC_302	1094-0063		0.210403	0.0186142	0.0915335	0.0169878	0.105418	0.200867	0.107843
SGTC_316	k060-0003		0.209665	-0.0127748	0.0525196	0.0100981	0.139475	0.0476765	0.150466
SGTC_226	1,3-diallylurea		0.206842	-0.00407178	0.0870483	0.00187121	0.147664	0.155224	0.0446048
SGTC_2025	5147754		0.206779	0.127766	-0.0202346	0.0243195	0.00952114	0.0615712	0.0968855
SGTC_1	0258-0098		0.206467	0.0356885	0.0176094	0.047301	0.0608301	0.0611114	0.302163
SGTC_867	0518-0118		0.206411	-0.00499629	0.00362343	0.0469098	0.110289	0.0712132	-0.00945448
SGTC_366	0181-0206		0.206147	0.0813929	0.0106262	-0.00881584	0.0309929	0.141585	0.141786
SGTC_1947	st076332		0.205144	0.00397745	0.0972183	0.112216	0.115462	0.0283104	0.0617032
SGTC_1582	3',3',6'-trihydroxyflavone		0.205135	-0.00477743	0.0904357	-0.00972743	0.0988282	0.08556	0.0751196
SGTC_432	NS 1619	A K+/calcium channel activator.	0.204957	-0.00637342	-0.0202658	0.288273	0.0420522	0.0467506	0.0677167
SGTC_3180	9109287		0.204585	0.0489449	0.118923	0.0792186	0.206045	0.0476804	0.177907
SGTC_1798	st045719		0.204506	0.10238	0.100793	-0.000611149	0.0568381	0.10814	0.0163935
SGTC_99	0109-0120		0.204454	-0.0232946	0.0254005	0.0369786	0.122889	0.198	0.0979827
SGTC_2098	5376439		0.20391	0.000998628	0.0963148	0.0539582	-0.0419941	-0.00290844	0.0406994
SGTC_364	0083-0097		0.203591	0.0178512	0.115858	0.117468	0.482757	0.0786722	0.227783
SGTC_1693	xanthone	An insecticide.	0.203405	0.0174932	0.0204633	0.0131159	0.0509842	0.0743306	0.307292
SGTC_31	0508-1974		0.199331	-0.0369787	0.0467372	0.107909	0.118006	0.145399	0.220795
SGTC_832	4083-0019		0.199293	0.0909535	0.0287613	0.0614442	0.480574	0.059045	0.119904
SGTC_2467	5474540		0.198973	0.0110734	-0.0381565	0.0698539	0.112787	0.177463	0.10912
SGTC_1339	1486-1321		0.198911	0.0486784	0.00962631	-0.021935	0.120033	0.140607	0.10091
SGTC_546	peri-Naphthalide	A penicillin ester.	0.196457	0.0188945	0.0269318	-0.0342875	0.139328	0.0971727	0.39284
SGTC_1781	st038725		0.196224	0.0160432	0.050738	0.0107196	0.4501	0.0964699	0.214736
SGTC_2035	5154463		0.194971	-0.0495618	0.0679412	0.0312516	0.142757	0.138154	0.137886
SGTC_1711	st032263		0.194066	0.0333147	-0.0541878	0.165181	0.00218389	0.0200831	0.0302967
SGTC_13	0199-0087		0.193766	0.0307731	-0.0262917	0.00305017	0.0298111	0.0593561	0.0840113
SGTC_2874	9043904		0.193211	0.195803	0.0420343	0.082652	0.0024624	0.122039	-0.0450451
SGTC_282	k297-0036		0.193146	0.0926038	0.0508666	0.12009	0.107115	0.0780277	0.0755054
SGTC_2173	5763948		0.192778	-0.0314266	-0.0305142	0.144388	0.0571657	-0.00180896	0.2523
SGTC_816	0325-0417		0.192589	0.00448377	0.104985	-0.0379941	0.0450317	0.0479373	-0.00348392
SGTC_1812	st052057		0.19171	0.0151231	0.00481799	0.0712769	0.00657611	0.0966692	0.0920595
SGTC_272	doxorubicin	Doxorubicin forms complexes with DNA by intercalation between base pairs, thereby preventing DNA replication. Additionally, doxorubicin inhibits topoisomerase II activity by stabilizing the DNA-topoisomerase II complex, preventing the religation portion of the topoisomerase II reaction.	0.190852	0.0269628	0.0593182	-0.0510647	0.131983	0.114258	0.222398
SGTC_2702	st077768		0.190598	-0.0139284	0.137695	0.00145596	0.169248	0.101623	0.0843646
SGTC_1749	st037932		0.189788	0.00317291	-0.0725487	0.0647947	0.0762306	-0.0329141	0.143584
SGTC_3287	9117173		0.189497	0.054936	0.0558341	-0.00534396	0.0187101	0.046481	0.026183
SGTC_1274	0865-0114		0.189075	0.0234352	0.019162	-0.00270723	0.0472247	0.122818	0.304215
SGTC_2927	9011802		0.188439	0.00742038	-0.00297056	0.0330075	0.110085	0.129807	0.0641802
SGTC_3024	9090631		0.188094	0.0867325	0.0860706	0.0309007	0.0110099	0.0462129	0.0218977
SGTC_797	k781-0471		0.187213	0.0352262	0.027815	0.147107	0.0988229	0.0744435	0.172086
SGTC_3275	9138069		0.186953	0.0212621	-0.00612991	-0.0252908	0.0244806	0.120748	0.0296541
SGTC_2950	9072895		0.186276	0.0324553	-0.04113	-0.0671803	0.0128305	0.120647	0.185686
SGTC_2883	9059145		0.186263	0.0109766	-0.0374673	0.295691	0.093251	0.109507	0.122382
SGTC_2328	6201408		0.185895	0.0922739	0.0582039	0.0195719	0.142598	0.06603	0.0831256
SGTC_1461	k072-0203		0.18533	0.0716651	0.0395676	-0.00616127	0.0580559	0.0873711	0.107419
SGTC_2637	3-alpha-acetoxydihydrodeoxygedunin		0.185236	0.006096	0.0332158	0.0854311	0.078233	0.147491	0.0672316
SGTC_3043	9092303		0.184573	0.0441493	0.15068	0.0677232	0.266739	0.0695598	0.0655415
SGTC_876	0720-0963		0.182976	0.0503985	0.0295283	0.0461906	0.0633987	0.121083	0.062272
SGTC_1178	0988-0033		0.182971	0.15864	0.0426769	0.145435	0.20113	0.115546	0.0723571
SGTC_273	hydroxyurea	Anti-neoplastic. Inactivates ribonucleoside reductase by forming a free radical nitroxide that binds a tyrosyl free radical in the active site of the enzyme. This blocks the synthesis of deoxynucleotides, which inhibits DNA synthesis and induces synchronization or cell death in S-phase.	0.182949	-0.0235014	0.0719547	0.0295969	0.152392	0.053137	0.298904
SGTC_1028	k015-0029		0.18282	-0.0044259	0.0339651	-0.0371027	0.0613328	0.134783	0.22685
SGTC_800	3448-7362		0.18277	0.0427058	0.033949	0.0489615	0.544519	0.0853538	0.137635
SGTC_2599	2',3-dihydroxy-4,4',6'-trimethoxychalcone		0.182636	-0.0225559	-0.0618639	0.0103494	0.063291	0.0599639	0.230586
SGTC_2403	6032726		0.182552	0.0986413	0.0226377	-0.0438084	0.0480999	0.07905	0.0481649
SGTC_2996	9066192		0.182232	0.144576	0.0649366	0.00598466	0.307906	0.131921	0.208403
SGTC_2530	3-alpha-hydroxy-4,4-bisnor-8,11,13-podocarpatriene		0.182022	-0.0082442	-0.00321589	0.148498	0.0759241	0.130066	0.172998
SGTC_2856	9022925		0.181845	0.0391111	0.0335466	0.234662	0.0818205	0.0335537	0.205156
SGTC_1805	st050013		0.181105	0.14999	-0.0127496	0.156601	0.0250296	0.0145692	-0.00388574
SGTC_3006	9075424		0.180789	0.0626632	0.0101201	-0.0261158	0.0790011	0.0659916	0.143555
SGTC_1808	st050063		0.179243	-0.0177924	0.0329986	-0.04881	0.0271294	0.0914492	0.0082565
SGTC_449	xestospongin c	Synthetic form of the macrocyclic bis-1-oxaquinolizidine isolated from the Okanowan marine sponge.	0.17915	-0.00632123	0.0118532	0.0636455	0.15614	0.135644	0.367322
SGTC_144	4161-2749		0.17837	0.0166806	0.141463	0.000544264	0.0259418	0.09225	0.116055
SGTC_2854	9024559		0.178145	0.04003	0.0197805	0.0370619	0.171533	0.0960748	0.0832157
SGTC_975	1335-0046		0.177651	0.0124218	0.0943239	0.0657585	-0.0282963	-0.0140711	0.0563035
SGTC_814	3342-0569		0.177435	-0.00966118	-0.0247624	0.00907308	0.0432529	0.181424	0.0746847
SGTC_762	1165-0429		0.176998	0.0952044	0.0601108	-0.0566522	-0.0510636	0.0867001	0.0940016
SGTC_2004	4023728		0.176962	0.0647417	-0.0308407	-0.0213284	0.0540384	0.152884	0.193749
SGTC_214	4373-3496		0.176685	0.0758528	0.187311	0.015229	0.0561224	0.103651	0.128849
SGTC_1694	st024011		0.176444	-0.0052309	-0.0146219	0.0601335	0.0999758	0.133366	0.338279
SGTC_229	benomyl	Benomyl is a fungal microtubule inhibitor often used in molecular biology to study the cell cycle in yeast.	0.17641	0.00323279	0.0860361	-0.0135109	-0.0238047	0.0506248	0.294474
SGTC_2817	7995342		0.176264	0.0747606	0.084699	-0.0433108	0.128086	0.0499932	0.0623121
SGTC_1740	st038286		0.176033	0.0430456	0.104469	0.000638478	0.0623081	0.0477431	0.0174888
SGTC_719	2810-4230		0.175447	0.0966609	0.109761	-0.0282222	0.00891417	-0.0112502	-0.00248772
SGTC_991	3996-0057		0.174508	0.00200804	0.00860992	0.0254439	0.120568	0.0379009	0.013598
SGTC_2185	6113692		0.174371	-0.0136529	-0.00810708	0.0529561	-0.0105365	0.0289429	0.105984
SGTC_965	1291-5240		0.174264	0.102583	0.253144	-0.0724924	0.173059	0.148668	0.117011
SGTC_945	3381-0768		0.174205	0.0170357	-0.045184	0.0256581	0.0312189	0.103676	0.238234
SGTC_2917	7979103		0.173775	0.00388133	-0.00820258	-0.101601	0.118429	0.0821928	0.080632
SGTC_2448	5185112		0.173723	0.0412463	0.0234389	-0.0286631	0.0648972	0.14872	0.140558
SGTC_2538	3',7'-epoxycaryophyllan-6-one		0.173422	0.0174717	0.0474422	0.00786188	0.0363165	0.0560844	0.0907764
SGTC_2469	5655019		0.173219	-0.0173959	0.0186093	0.0861505	0.0524387	0.050951	0.0964279
SGTC_246	cycloheximide	CycloheximideÂ is anÂ inhibitorÂ ofÂ protein biosynthesisÂ inÂ eukaryoticÂ organisms, produced by the bacteriumÂ Streptomyces griseus. Cycloheximide exerts its effect by interfering with the translocation step in protein synthesis thus blockingÂ translational elongation. Cycloheximide is widely used in biomedical research to inhibit protein synthesis in eukaryotic cells.	0.173018	0.0775916	-0.0496394	0.140056	0.191022	0.0799532	0.0694953
SGTC_355	1311-2252		0.170709	0.127755	0.0835691	0.0585591	0.103155	0.0336994	-0.0544138
SGTC_803	4488-1585		0.169518	-0.0206131	-0.0346635	0.0569495	0.104704	0.085676	0.122206
SGTC_1609	st001574		0.168764	0.0674712	-0.0186006	0.144418	0.035931	0.0597967	0.0721328
SGTC_1469	k284-2957		0.168672	0.052792	0.0341434	-0.0117882	0.0874496	0.130538	0.0717715
SGTC_385	1494-0393		0.16814	0.121036	-0.00914949	0.016189	0.110766	0.0356789	0.0379486
SGTC_378	3970-0959		0.168045	0.11126	0.0689212	-0.0489394	0.162815	0.122911	0.191583
SGTC_2957	9076800		0.168007	-0.0278693	0.0568794	0.0186003	0.0202069	0.158533	0.0379841
SGTC_970	1315-0089		0.167832	-0.0507312	0.0801153	0.0894737	0.00591748	0.00330748	0.0969148
SGTC_1210	3013-0140		0.167825	0.0352403	-0.0398055	-0.0371111	-0.0175811	0.144577	-0.00196411
SGTC_2390	9097792		0.167712	0.0657297	0.109328	0.0212209	0.0684047	0.0528898	0.00763448
SGTC_1374	2889-5571		0.167696	0.00381547	0.0447348	-0.0148485	0.141413	0.0910301	0.51445
SGTC_1087	pterostilbene	Similar to reservatol, lowers cholesterol.	0.167357	0.057174	0.0998061	0.0100653	0.131977	0.0582438	0.00322429
SGTC_1967	st070177		0.167119	0.0065799	0.10786	0.0153628	0.204068	0.0793033	0.0502427
SGTC_84	0443-0269		0.166789	0.118034	0.037083	0.0041747	0.113538	0.0775292	0.0832573
SGTC_2652	actinonin	A inhibitor of aminopeptidase M, N and leucine. Also an alanyl aminopeptidase and peptide deformylase.	0.166772	0.00214586	0.00581102	-0.0267322	0.0968695	0.199541	0.000626165
SGTC_114	0364-0001		0.166594	-0.0348765	0.0741066	0.0183563	0.154778	0.0969458	0.0727341
SGTC_2307	7538926		0.16644	0.0329876	0.0390332	0.109112	0.0925219	0.00748193	-0.00487174
SGTC_1686	st019653		0.166334	-0.0123955	0.018787	-0.00151982	0.0274408	0.0394529	0.16967
SGTC_2239	6685329		0.165589	0.216642	0.0781097	-0.0231279	0.12697	0.142291	0.112022
SGTC_414	piperonyl butoxide	A potent inhibitor ofÂ cytochrome P450.	0.16476	-0.00899455	0.0669245	-0.0236183	0.0439075	0.0413763	0.053924
SGTC_839	0122-0028		0.16474	0.0439324	-0.00957413	-0.0423956	0.0615144	0.0824453	0.178336
SGTC_1948	st076329		0.16463	0.10115	0.0795456	0.0446655	0.189281	0.0525763	-0.0187786
SGTC_2391	6285546		0.164123	0.0647858	0.0497868	0.0867913	0.146018	0.112908	0.0662449
SGTC_416	estradiol valerate	A steroid.	0.163966	-0.0512549	0.0341258	-0.105945	0.0366325	0.113121	0.0751884
SGTC_1583	clindamycin	Cindamycin is an antibiotic that acts by inhibiting bacterialÂ protein synthesis.	0.163666	0.056172	0.111408	0.0339237	0.0121348	0.0825201	0.303292
SGTC_60	0986-0278		0.16313	-0.0156238	0.0373355	-0.0173418	0.00555392	0.0586427	0.0299924
SGTC_691	1548-0686		0.162585	0.07439	0.0700715	0.100003	0.322828	0.0493991	0.0489144
SGTC_2992	9074591		0.162372	0.0906723	-0.0441247	0.00186829	0.073544	0.054795	0.0292661
SGTC_1493	4348-0038		0.161511	0.0407643	-0.0196847	-0.00809342	0.0813647	0.108203	0.397891
SGTC_2747	doxorubicin	Doxorubicin forms complexes with DNA by intercalation between base pairs, thereby preventing DNA replication. Additionally, doxorubicin inhibits topoisomerase II activity by stabilizing the DNA-topoisomerase II complex, preventing the religation portion of the topoisomerase II reaction.	0.161049	0.0273306	0.000672418	0.0104804	0.118985	0.111013	0.278837
SGTC_1786	berberine	BerberineÂ is aÂ quaternary ammoniumÂ salt andÂ isoquinolineÂ alkaloid.	0.161044	0.0131871	0.0465598	-0.0223683	0.0388213	0.10193	0.129248
SGTC_1183	1254-0324		0.16098	-0.00818608	-0.08152	0.00305844	0.0597481	0.0257873	0.160102
SGTC_3218	9131285		0.160716	0.0155248	0.0388156	0.0648358	0.0897279	-0.0326444	0.0566966
SGTC_766	1391-0721		0.160381	0.0924908	0.0948411	-0.0197281	0.0464635	0.0391463	-0.0181979
SGTC_3127	9126946		0.160242	0.0236069	-0.103225	0.0573943	0.052306	0.11154	0.129692
SGTC_1804	st050076		0.159859	-0.00461421	0.0553055	-0.0103406	0.122641	0.0839888	0.0674464
SGTC_2202	7226349		0.159773	-0.0237998	-0.0163426	-0.00810626	0.138985	0.144866	0.265215
SGTC_2906	7926292		0.159676	0.141046	0.105438	-0.0347292	0.07727	0.0370543	0.0610275
SGTC_1094	duloxetine	A selective serotonin reuptake inhibitor.	0.159578	0.100028	-0.0434973	0.0968639	0.0278633	0.014768	0.0965199
SGTC_2405	ticlatone	An FDA approved topical antifungal of unknown mechanism.	0.159535	-0.0065934	-0.00330394	-0.0137897	0.0849614	0.09765	0.0168441
SGTC_745	0469-0705		0.159525	0.0365936	-0.0234512	-0.0383519	0.0835263	0.099443	0.25888
SGTC_2072	5231554		0.159492	0.0995811	0.157708	-0.0258971	0.0550151	0.0980249	0.100167
SGTC_2649	anisomycin	Antibiotic isolated fromÂ Streptomyces griseolusÂ that inhibits protein synthesis. Acts by inhibiting peptidyl transferase activity in eukaryote ribosomes.	0.159333	0.11529	0.0269058	0.0601755	0.110893	0.0135192	0.0403231
SGTC_274	sirtinol	NAD-dependent acetyltransferase inhibitor.	0.15914	0.00222098	-0.026043	0.124314	-0.0383667	0.0552267	0.112322
SGTC_1557	sumaresinolic acid	A natural terpine and antifungal of unknown mechanisn.	0.158936	-0.00485291	-0.0356332	-0.0516734	0.00402461	0.0772864	0.030907
SGTC_2892	9047358		0.158927	0.0150108	0.0115597	0.00142521	0.0165288	0.144416	0.049823
SGTC_170	4197-0004		0.158894	0.0169595	-0.0117916	0.136841	0.0844836	0.0505255	0.0703591
SGTC_3242	9133940		0.158704	-0.0368045	-0.0423943	0.110649	0.00742916	0.0972091	0.176242
SGTC_3084	9116877		0.158217	0.0545923	0.180312	0.0652723	0.0620978	0.0686396	0.0173779
SGTC_3203	9113543		0.157683	0.0754194	0.073348	-0.0252201	0.000787666	0.0813729	-0.0239274
SGTC_376	3970-0862		0.15726	0.0541286	0.230065	0.0602405	-0.00469321	0.0275402	0.0564755
SGTC_1860	st056228		0.157222	0.0263435	0.0274051	-0.0234764	0.0975365	0.0762207	0.0377855
SGTC_2688	kanamycin b	Kanamycin is isolated from the bacterium Streptomyces kanamyceticus and its most commonly used form is kanamycinÂ sulfate. Kanamycin interacts with the 30S subunit of prokaryotic ribosomes resulting in mistranslation and indirect inhibition of translocation during protein synthesis.	0.157025	0.0716152	0.0850176	0.0608183	0.492476	0.0508925	0.13037
SGTC_2060	5238662		0.156791	-0.0135608	0.110863	8.9779e-05	0.0951914	0.0914381	0.0805624
SGTC_1327	1436-0082		0.156745	-0.0333027	0.0764131	0.104975	0.0762301	0.0161276	0.055646
SGTC_2414	st077232		0.15654	0.105884	-0.0527614	0.120931	0.0604295	0.0404965	0.0163172
SGTC_2140	5586273		0.155989	0.0054376	0.013521	-0.0357075	0.120894	0.117106	0.351402
SGTC_776	4476-4378		0.155932	-0.037372	-0.0310503	0.210613	0.0135041	0.0350827	0.0445534
SGTC_1242	0402-0103		0.155672	-0.0256449	0.0245219	0.164459	0.0443398	0.0210731	0.0382508
SGTC_2273	7815444		0.155595	-0.0163747	-0.0110462	0.0863431	0.0365663	0.0983553	0.177707
SGTC_2843	9000894		0.155401	0.0767298	-0.0306956	-0.0487806	0.0295756	0.172917	0.029364
SGTC_1024	4507-0395		0.155015	0.0927223	0.135525	-0.0386589	0.0913519	0.0715163	0.0305847
SGTC_2033	5192550		0.154923	-0.0409093	-0.00933548	0.162254	0.115195	0.136335	0.181195
SGTC_709	3807-1509		0.15488	0.00839869	-0.0123363	-0.0339451	0.0190055	0.0819781	0.379979
SGTC_1467	k284-1082		0.154759	0.0203187	-0.0234463	-0.0120469	-0.0370445	0.0138632	-0.00574466
SGTC_543	3844-1095		0.154619	0.0492159	-0.0275365	0.0240776	0.0222646	0.0883683	0.0529428
SGTC_1177	0983-0204		0.154491	0.0185024	-0.0084528	0.0687596	0.102458	0.106527	0.0683943
SGTC_988	1497-1057		0.154473	0.0719435	0.155912	0.0585707	0.0829418	0.09212	0.0486404
SGTC_952	1185-0122		0.154162	0.00896266	0.0128866	0.0670265	0.110859	0.0668379	0.105761
SGTC_3194	9111903		0.154042	-0.0115405	0.0788251	0.0380135	0.108454	0.147919	0.0805694
SGTC_466	geldanamycin	HSP90 inhibitor.	0.153827	-0.0224044	0.0567007	0.115192	0.0585986	-0.0325801	-0.00226524
SGTC_3077	9117319		0.153769	0.0558579	0.00725073	-0.0163711	0.0286842	0.0381451	0.0455567
SGTC_3323	9138564		0.153528	0.0337057	0.00853773	0.0857247	0.124308	0.0997588	0.131208
SGTC_885	0865-0106		0.153425	0.00524847	0.0207887	-0.0131347	0.03578	0.0391068	0.412862
SGTC_1899	st063254		0.153331	0.063056	0.0943019	-0.00622432	0.0707518	0.0772608	0.178075
SGTC_2022	5136654		0.152858	0.0252997	0.0410995	0.00376335	0.0278168	0.000441338	0.0244137
SGTC_2890	9046729		0.152722	-0.00103793	-0.00104749	0.000326097	0.0877041	0.0844473	0.340036
SGTC_2446	5162541		0.152625	0.00106402	-0.0153728	-0.030896	0.0919685	0.0979422	0.0992523
SGTC_3178	9107506		0.152495	0.0456866	0.0062399	0.0758587	0.153002	0.00944627	0.217459
SGTC_1761	st044296		0.15243	0.0299092	0.0377139	0.113725	0.211531	0.148152	0.110709
SGTC_1013	4112-3890		0.152423	-0.0617224	-0.0297083	0.129448	0.0173052	0.0547513	0.0735165
SGTC_400	oxethazaine	A local anesthetic.	0.152173	0.0349405	0.0765061	0.105578	0.0246083	0.0454443	0.0653876
SGTC_1276	0871-0068		0.151446	0.0993736	-0.0572232	0.0432889	0.0382354	0.150814	0.0322474
SGTC_1777	st045864		0.151257	-0.00725214	0.0711642	0.0128498	0.0604525	0.0913835	0.02496
SGTC_1150	3909-7983		0.15091	0.057848	0.0770838	0.0875462	0.143947	0.0122691	0.105447
SGTC_2084	5306078		0.150565	0.00117292	0.000744071	0.0267228	0.034425	0.137578	0.0160864
SGTC_2806	7952793		0.150507	0.196893	0.0199005	0.0127703	0.169681	0.0993947	-0.0169299
SGTC_2555	cholic acid	Influences liver metabolism.	0.150362	0.0339975	0.0785424	0.123376	0.178498	0.0366848	-0.0150077
SGTC_1652	st011932		0.150253	0.0255981	0.0214321	0.008368	0.0692583	0.0770555	0.407815
SGTC_1700	st030840		0.150185	0.0455471	0.0401361	0.116472	0.203735	0.0553376	0.241335
SGTC_11	0438-0307		0.149413	0.00890695	0.067658	0.129557	0.160348	-0.0242701	0.152978
SGTC_1346	1488-2224		0.149356	0.026812	0.0458831	0.0332769	0.0525096	0.0068095	0.20253
SGTC_1371	2421-0008		0.149108	0.0996133	-0.000804449	0.00249595	0.0819608	0.0895671	0.151823
SGTC_2726	cimetidine	A P450 inhibitor, histamine H2-receptor antagonist.	0.148764	-0.0122802	0.0582816	0.0120017	0.0711996	0.0968987	0.00776586
SGTC_377	3970-0964		0.148548	-0.0285608	0.139872	0.0307124	0.112741	0.120648	0.213595
SGTC_393	acivicin	AcivicinÂ is aÂ glutamineÂ analogÂ antimetabolite, used as an antineoplastic agent. It interferes with glutamate metabolism and inhibits glutamate dependent synthesis ofÂ enzymes, and is thereby potentially helpful in treatment ofÂ solid tumors. is an irreversible inhibitor of Î³-glutamyl transpeptidase.	0.148247	0.0016103	-0.0544743	0.0920202	0.00254465	0.0682813	0.155736
SGTC_2980	9014342		0.147564	0.00426324	0.0174812	0.0359803	0.162101	0.159909	0.195834
SGTC_2097	5376186		0.147547	-0.0153069	0.0769952	-0.0138023	0.120788	0.133775	0.0925383
SGTC_2471	5466956		0.146301	0.0337429	-0.0253919	0.0244473	0.0813156	0.146811	0.138608
SGTC_1009	4106-0057		0.145848	0.082877	-0.0154831	0.0642514	0.00376845	0.112649	0.0792814
SGTC_2915	7971052		0.145575	0.00658397	0.0672803	-0.0332009	0.302361	0.122391	0.0987014
SGTC_280	3448-3607		0.145498	0.00084583	0.0788138	0.00934423	0.00850433	0.152065	-0.017225
SGTC_187	1488-2104		0.145461	0.0012645	-0.0317745	0.055016	-0.0127265	0.0182175	0.0627302
SGTC_654	1124-0271		0.145399	0.0550936	0.111256	0.00947241	0.174934	0.0104369	0.0528619
SGTC_2397	5161689		0.145357	-0.0248192	0.00460021	-0.0340464	0.0242424	0.116609	0.0789423
SGTC_521	r062-0005		0.145334	0.00151947	-0.00471981	0.0581883	0.125539	0.045204	0.0609396
SGTC_168	3970-0862		0.145184	0.0790671	0.111535	0.0492977	0.0921074	-0.000471016	0.0275078
SGTC_2494	18-aminoabieta-8,11,13-triene sulfate		0.144721	0.0189752	-0.0574367	0.0293181	-0.0591886	-0.00993939	0.0291322
SGTC_3019	9081971		0.144501	0.0112998	-0.00307115	0.082068	0.0935775	0.0229397	0.0930795
SGTC_387	norethindrone acetate		0.144287	0.0291749	0.0311216	-0.0204099	0.0567762	0.0320025	0.0254087
SGTC_854	0422-0053		0.144195	0.0171306	0.00911794	0.042626	0.0802823	0.0413742	0.0776723
SGTC_1776	st049249		0.144133	0.0194282	-0.113945	-0.00897992	0.0459404	0.138126	0.116914
SGTC_3208	9114115		0.144099	0.0113757	0.026603	0.0606291	0.0608479	0.0975617	0.0264585
SGTC_1843	st055809		0.144004	0.101306	0.0076819	-0.0121102	0.075005	0.0861383	0.0195069
SGTC_740	k014-0057		0.143791	0.0104536	0.0364174	-0.00333668	0.11986	0.0624306	0.109928
SGTC_1375	2910-0797		0.143777	0.0493251	0.101156	0.0320049	0.1227	0.173805	0.192119
SGTC_2019	4016004		0.143744	0.015886	-0.0179642	0.0394496	0.149717	0.0626302	0.0531952
SGTC_1481	3346-2004		0.14366	0.0612444	-0.0806672	-0.0069885	-0.0080221	0.169048	0.14665
SGTC_1006	4099-6547		0.1436	-0.0279627	-0.0644259	-0.000991185	0.127659	0.0917955	0.124447
SGTC_1258	0671-0043		0.143107	-0.0329747	0.0223373	0.02411	-0.00180949	0.0244677	0.0362126
SGTC_1157	4092-0394		0.143078	0.117665	0.111994	0.0083285	0.208593	0.000888304	0.0258085
SGTC_1168	k815-0004		0.142954	-0.00784787	0.0100663	-0.0165151	0.0659679	0.124794	0.494642
SGTC_1056	3448-1962		0.142746	0.159341	0.0596505	0.000123	0.0505818	0.00805777	0.0318288
SGTC_1022	4477-0945		0.142709	0.0152297	0.0436945	0.0267763	0.043448	0.119358	0.164387
SGTC_791	1348-1292		0.142637	0.0613093	0.0254245	0.0186613	0.307396	0.147268	0.143722
SGTC_2141	5621638		0.142585	-0.0134878	0.0338565	0.041242	0.0130847	-0.0275952	0.419458
SGTC_72	0744-0168		0.14218	0.0661083	-0.0877257	0.0833546	0.0753311	0.118334	0.0712485
SGTC_2111	5486399		0.142023	0.0131069	-0.0343405	-0.0165081	0.0499918	0.0753241	0.332721
SGTC_2664	lyso-paf C-16	Lyso-PAF C-16 is a metabolite of the platelet-activating factor (PAF); natural occuring lipid involved in cellular signaling.	0.141913	-0.0230139	0.0195799	0.0333944	0.0840823	0.00678473	0.0576048
SGTC_1544	7-methoxy-4-methylcoumarin		0.141365	0.174748	-0.0512872	-0.000967871	0.0229148	0.0257111	0.0788695
SGTC_1340	1486-1359		0.141184	0.01169	-0.0119788	-0.0544776	0.0118753	0.190177	0.026624
SGTC_1591	genipin	A DNA cross-linking agent.	0.141096	0.0263389	0.0160116	-0.0551142	0.0375222	0.0607905	0.214227
SGTC_3232	9132874		0.140992	0.0307968	0.0191444	0.05297	0.0768292	0.0741731	0.0736474
SGTC_241	5hr heat shock (37 degrees C) + cantharidin	Cantharidin is a toxic blistering agent secreted by the Spanish fly of unknown mechanism. In Saccharomyces cerevisiae, cantharidin is thought to act by inhibiting GLC7 (encoding type 1 serine/threonine protein phosphatase) as decreased expression confers hypersensitivity and overexpression confers resisitance (Hoon et al., Nat Chem Biol 4, 2008).	0.140977	-0.0208314	0.0407362	0.036317	0.0635394	0.069344	0.226611
SGTC_1514	1189-1591		0.140746	0.0162987	-0.0124273	0.0221234	0.0704008	0.189628	0.118146
SGTC_1920	st075728		0.140713	0.0871263	0.0460239	-0.00569801	0.133736	0.118991	0.137004
SGTC_2734	clemastine	Clemastine is a selective histamine H1 antagonist.	0.14057	-0.0186224	-0.0375436	0.138723	0.00841567	0.0897888	0.00717961
SGTC_450	aminopyrene	Aminopyrene is an established DNA mutagen.	0.140354	0.0278239	0.019736	0.0531205	0.0288612	-0.00239856	-0.0118309
SGTC_911	3456-4043		0.14013	-0.0399142	0.00160756	0.162431	0.0280776	0.0556712	0.104835
SGTC_3041	9091929		0.139802	-0.0389684	0.0267582	0.0320705	0.104361	0.00394244	-0.0370189
SGTC_2811	7967822		0.139591	0.0350322	0.0440356	-0.0492439	0.122936	0.0876186	0.108983
SGTC_15	0266-0086		0.139541	0.0396676	0.111527	0.0468812	0.226487	0.0890798	0.196509
SGTC_741	4582-0002		0.139522	0.0652488	0.0536437	0.00926605	0.111983	0.122481	9.55321e-05
SGTC_2240	6690706		0.139453	0.0220831	0.0742841	-0.053665	0.019173	0.0645446	0.0636328
SGTC_292	k038-0015		0.13929	0.0176895	0.035169	-0.0180307	-0.019507	-0.00629561	-0.00870184
SGTC_866	0495-0101		0.139277	0.000420129	0.105966	0.00193726	-0.00341541	0.124478	0.0461824
SGTC_448	monastrol	MonastrolÂ is a cell-permeable small molecule inhibitor discovered by Thomas U. Mayer in the lab ofÂ Tim Mitchison. Monastrol was shown to inhibit theÂ kinesinÂ Eg5, aÂ motor proteinÂ important for spindle bipolarity	0.139185	0.0521565	0.0591309	-0.0412176	0.0832672	0.00574384	0.049507
SGTC_447	ml7	Selective myosin light chain kinase inhibitor.	0.139087	0.0110633	0.0422554	0.102121	-0.00853209	0.0339789	0.216986
SGTC_956	1185-0240		0.139087	0.0386639	0.0139118	0.0506522	-0.00200104	0.0778378	0.0622424
SGTC_2146	5545642		0.138925	0.152068	0.045163	0.120818	0.144035	-0.00051027	0.0597562
SGTC_1570	verbenone	A natural terpanoid with antifungal properties.	0.138876	0.100971	0.053304	-0.0601652	0.0561371	0.0937819	0.0498365
SGTC_877	0771-0151		0.138755	-0.00923873	-0.0284054	0.0284287	0.0746879	-0.00157329	0.0175668
SGTC_692	k241-0027		0.138364	0.0227281	0.0087224	-0.0563871	0.0143825	0.117874	0.00400109
SGTC_2134	5324836		0.138278	0.0161398	0.0821759	-0.0246976	0.061581	0.0533796	-0.00238613
SGTC_499	genistein	A kinase inhibitor, peroxisome proliferator-activated receptor activator and oxygen scavenger.	0.138204	-0.0280518	0.0417588	-0.00144442	0.00829912	0.0907689	0.104478
SGTC_259	usnic acid	An anti-infective, antifungal and antitrichomonal agent.	0.137935	0.0311367	-0.0117441	0.0710479	0.0393529	0.0824097	0.0263919
SGTC_4	0960-0234		0.137724	-0.00487202	0.0347193	0.112299	-0.00175866	-0.0251679	0.0497274
SGTC_580	1123-0028		0.137721	-0.0039803	0.0485131	-0.0326516	0.10063	0.0524502	0.469137
SGTC_1722	st034304		0.137426	0.106898	0.0847793	0.0285052	0.0962852	0.00610598	0.191308
SGTC_3235	9132602		0.136994	-0.0288566	-9.95895e-05	0.0310541	0.135541	0.0298411	0.107978
SGTC_37	0566-0070		0.136912	-0.0152678	0.123759	0.0436695	0.263689	0.111176	0.135802
SGTC_1294	1000-1494		0.136878	0.079535	0.00573011	0.133615	0.033129	0.0704459	0.0387515
SGTC_1093	fluphenazine	An atypical antipsychotic.	0.136577	0.098508	0.0538812	0.0871872	0.177458	0.123662	0.0470656
SGTC_715	0868-0130		0.136551	0.0828509	0.0532137	0.0410652	-0.001207	0.130777	0.019637
SGTC_1437	4092-1038		0.136423	-0.0101122	-0.0333831	0.0301867	0.0709705	0.105404	0.211421
SGTC_1255	0566-0045		0.136396	0.043013	-0.0519545	0.0214114	0.093835	0.113019	0.0109931
SGTC_288	1315-0019		0.136269	0.00434641	0.0110543	0.0121741	0.0473137	0.00658691	0.287549
SGTC_2863	9028737		0.135858	0.00628942	0.0868525	0.0409779	0.0444057	-0.0325172	0.0557358
SGTC_392	N-ethylmaleimide	N-EthylmaleimideÂ (NEM) is anÂ organic compoundÂ that is derived fromÂ maleic acid. It contains theÂ imideÂ functional group, but more importantly it is anÂ alkeneÂ that is reactive towardÂ thiolsÂ and is commonly used to modify cysteine residues in proteins and peptides.	0.135683	0.153865	0.0567497	-0.0368405	0.0140232	0.112608	0.0170222
SGTC_2505	galangin	Galangin is a flavonoid found in medicinal herbs. An inhibitor of cancer cell proliferation, galangin is used to study mechanisms of genotoxicity.	0.135638	-0.00939572	0.0159132	-0.0265723	0.0562292	0.112793	0.0452084
SGTC_1942	st076330		0.135573	-0.0388542	-0.00379847	0.0355669	0.00566472	0.0494926	0.00093834
SGTC_471	1-acyl-paf		0.135506	0.0957667	-0.0077712	-0.028004	0.102366	0.0478	0.0419952
SGTC_2698	st077697		0.135205	0.0154534	0.109621	-0.00617321	0.0969012	0.0353457	0.0931308
SGTC_2156	5649887		0.13516	-0.0298423	0.061199	0.0406769	0.101735	0.167627	0.297128
SGTC_87	0100-0052		0.134949	0.11131	0.0280342	-0.00705807	0.0627647	-0.010123	-0.0563163
SGTC_1525	8-methoxypsoralen	Related to psoralen; DNA damaging agent.	0.134774	0.0387073	0.0236725	0.0104795	0.0223823	0.0821724	0.377906
SGTC_2859	9028643		0.134171	0.0505737	0.0603106	0.0286429	0.0592146	0.103357	0.0158383
SGTC_880	0833-0487		0.134126	0.133283	0.17334	-0.0784141	0.05103	0.0396697	0.0149045
SGTC_1932	st074806		0.134058	0.0224435	0.0518235	0.0665534	0.0868831	0.119639	0.0581658
SGTC_1311	1190-0148		0.133956	0.0157451	0.0288734	0.02261	0.00875444	0.0220217	0.28012
SGTC_2463	5473429		0.133861	-0.0343949	-0.0407357	0.0720657	0.0936273	0.121355	0.0255524
SGTC_2348	9022543		0.133858	0.00111092	0.000907603	-0.0158341	0.0697528	0.119006	0.390024
SGTC_2147	5545932		0.13377	0.0371855	0.00386182	0.133688	-0.0199534	0.102937	-0.0139887
SGTC_2005	4024620		0.133767	0.106093	0.00965194	0.0840097	0.0602014	0.0554505	-0.0385418
SGTC_1298	1079-1278		0.13339	0.0292163	0.0722432	-0.0132861	0.156698	0.0543386	0.113266
SGTC_1529	coumarin	A hepatotoxic, DNA x-linker.	0.133329	-0.0199229	-0.00522476	-0.0572199	-0.00501547	0.146485	0.213402
SGTC_2790	5423970		0.133203	-0.0176987	-0.0253146	0.0186887	0.010455	-0.0399315	0.208997
SGTC_2347	9049783		0.133073	0.0257879	0.0142641	0.000627866	0.0627237	0.125921	0.0424453
SGTC_2961	9083290		0.133011	0.128777	0.115642	-0.0176325	0.00393049	0.0425179	0.0469052
SGTC_1509	1326-1131		0.132979	0.0869114	-0.0559653	0.0303005	0.0415691	0.088903	0.113416
SGTC_901	1112-0062		0.132851	0.0382301	0.0351759	0.0004862	0.106175	0.0101899	0.0165112
SGTC_1997	st073024		0.132815	-0.0302075	0.0393507	-0.00302823	0.0290251	0.0978487	0.15312
SGTC_1368	1852-0141		0.132702	-0.0123103	0.00477605	0.0488184	0.0982404	0.00811426	-0.00618848
SGTC_174	3553-0389		0.132502	0.100646	0.0353737	0.0220949	0.0912297	0.19556	0.189863
SGTC_1705	st027868		0.132328	0.02062	-0.00679565	0.0814866	0.00437921	0.0379055	-0.030596
SGTC_22	0964-0034		0.132267	0.00551272	0.00239339	0.00159788	0.073089	0.184288	0.322942
SGTC_2199	6590217		0.132124	-0.024667	0.00455787	0.00298449	0.0761256	0.020968	0.0902357
SGTC_2751	anetholtrithion	A chloretic substance that stimulates the liver to produce bile.	0.132075	0.00802859	0.0997237	0.0184565	0.156593	0.107039	0.120384
SGTC_2145	5634607		0.132075	0.130186	0.145281	0.0850405	0.0812298	0.0852766	0.055072
SGTC_1954	st077032		0.132072	0.095749	0.163241	-0.00601947	0.0765145	0.0560511	0.0491335
SGTC_788	1182-0090		0.132064	-0.0234804	0.0217232	0.105166	-0.00888304	0.00716317	0.191248
SGTC_634	1611-4317		0.13189	0.0159732	-0.0222943	0.0393004	0.084544	0.019566	0.0904271
SGTC_728	3030-5151		0.131397	0.0813385	0.075913	-0.032836	0.158055	0.129368	0.0217412
SGTC_3309	9129340		0.131162	-0.0226838	0.060089	0.0106171	-0.00307276	0.0937739	0.0667187
SGTC_1413	3910-0535		0.130938	-0.0208945	0.0148016	0.0194061	0.0418074	0.120981	0.118553
SGTC_630	4356-0227		0.130833	0.025784	-0.023861	0.19084	0.131862	0.0400306	0.0933769
SGTC_1296	1068-0102		0.130454	0.0816196	0.0241592	-0.0121598	0.0257333	0.0490719	0.132339
SGTC_2479	5617353		0.130225	-0.00405305	0.0271654	0.0726374	0.0673	0.0494435	0.200736
SGTC_1719	st032227		0.130143	0.173301	0.00382605	-0.0192835	0.0395834	0.0589919	0.105824
SGTC_2042	p-Dimethylaminoacetophenone	A free radical scavenger.	0.129932	0.160757	0.073693	-0.0615103	0.131691	0.110409	0.0808852
SGTC_2718	lomofungin	A RNA synthesis inhibitor.	0.129696	0.00466909	-0.014833	-0.00315227	0.0747797	0.0951061	0.34224
SGTC_1229	0139-0193		0.12962	-0.0101901	-0.0235433	-0.0580313	0.0226832	0.0771235	0.330742
SGTC_315	k915-0449		0.129617	0.00422882	0.0865182	0.0238999	-0.0436947	0.0257342	0.0839526
SGTC_724	3910-0327		0.129504	0.100444	0.0213377	0.0354239	0.0739777	0.0416396	0.0579761
SGTC_544	k015-0020		0.129424	0.0513108	0.0341824	0.00883914	0.162115	0.0824063	0.0349779
SGTC_2188	6126565		0.129345	-0.035493	0.0174907	0.00389563	0.0607161	0.0549792	0.358711
SGTC_3066	9117245		0.129273	0.0807055	0.00444081	0.0415126	0.061254	0.0153463	0.077311
SGTC_2973	9094665		0.129191	0.014298	0.0259036	0.0532637	-0.015744	0.0201358	0.192585
SGTC_1738	st035555		0.129065	0.019323	0.0351162	-0.0570331	0.097608	0.0503225	0.0946381
SGTC_3148	9097893		0.12906	-0.0100834	-0.0259923	0.144029	0.147858	0.19465	0.188732
SGTC_2207	7258803		0.129031	0.236668	0.0268313	-0.0194684	0.0712129	0.156292	-0.00455998
SGTC_1205	4161-2785		0.129002	0.0309773	0.110151	-0.0375479	0.00919706	0.0106847	0.0245963
SGTC_2647	atorvastatin	Atorvastatin is a specific inhibitor of HMG-CoA reductase. HMG-CoA reductase is the enzyme that catalyzes the conversion of HMG-CoA to mevalonate, an early step in cholesterol biosynthesis.	0.128526	-0.00482458	0.0620116	0.0296737	0.00520082	0.0174789	0.31569
SGTC_375	3970-0961		0.128441	0.025593	0.00727151	0.014647	0.0874425	0.0507113	0.235536
SGTC_332	4112-0506		0.128413	0.03433	0.00344429	-0.0143582	0.0302236	0.0170346	0.23691
SGTC_1712	st032288		0.128205	-0.0264747	-0.00781944	0.0401044	0.0372296	0.0643938	0.294157
SGTC_1651	st011928		0.127975	0.0771029	-0.0299378	0.049842	0.0759255	0.0800652	0.264017
SGTC_2974	9094440		0.127874	0.026115	-0.0146096	-0.00166496	0.0226111	0.0140499	0.213057
SGTC_1949	st076024		0.127792	0.0382895	0.0397872	0.0342984	0.0895033	0.0969411	0.0625004
SGTC_953	1188-0045		0.127711	0.0815237	0.0713238	-0.0326644	0.134499	0.144508	0.0754277
SGTC_830	4076-0286		0.127501	0.0362773	0.0650948	0.0937339	0.419372	0.0215311	0.0366005
SGTC_177	1327-0068		0.127469	0.0115825	-0.012048	0.0191957	0.103914	0.00585898	0.157683
SGTC_2201	6605497		0.127451	0.0317519	0.0224861	0.13116	0.0216132	-0.0307905	0.0526095
SGTC_2534	helenine	Natural product isolated from Penicillium funiculosum with antiviral properties.	0.127361	0.00941963	0.00559594	-0.0193071	0.0760804	0.0585761	0.532203
SGTC_2256	7954252		0.127305	0.049091	-0.0241184	-0.0133778	0.0900175	0.0877684	0.160404
SGTC_2557	derrustone	An antioxidant.	0.127289	0.0764542	-0.0460403	-0.0169846	0.0266722	0.0674533	0.130479
SGTC_611	3453-1652		0.12714	0.0577601	-0.0575613	0.0265844	0.0536481	0.0356714	0.0334428
SGTC_2008	4012253		0.127132	-0.00539623	0.0179927	0.156157	0.185228	0.0826847	0.124104
SGTC_1132	3456-3614		0.126952	0.020118	-0.0069684	0.0200989	0.0601942	0.198164	0.135529
SGTC_1537	2',6'-dihydroxyflavanone	A p450 inhibitor.	0.126349	0.0263357	0.0919668	0.0639948	0.0683478	0.0361493	0.0439137
SGTC_3324	9138759		0.12629	0.0440167	-0.0516136	0.189032	-0.0501077	0.0415828	0.0367119
SGTC_2821	7996764		0.126042	0.0260354	-0.0518889	0.0180864	-0.00105396	0.0570774	-0.0258528
SGTC_2076	5212012		0.125771	-0.0227621	-0.0447402	0.00883619	0.0261845	0.11124	0.107251
SGTC_2406	ethylparaben	A possible steroid mimic.	0.125481	0.00832977	0.0263432	0.151251	0.0794906	0.0882598	0.239892
SGTC_2914	7968218		0.125401	0.0693705	0.0461745	-0.0560396	-0.0152271	0.00185994	0.175482
SGTC_1893	st059353		0.125066	0.0188951	0.0585661	0.037464	0.0365646	0.0111589	0.0997558
SGTC_2255	7941087		0.124921	0.0596415	0.0566721	0.00712136	-0.00279998	0.00568004	0.10433
SGTC_2290	7904846		0.124846	0.0116085	-0.0286959	0.130544	0.0875687	0.0605561	0.261933
SGTC_2598	perillyl alcohol	An apoptosis inducer.	0.124791	0.162298	0.0123643	0.0299106	0.0457565	0.0448659	0.0299263
SGTC_858	0438-0351		0.124382	0.0436055	0.121685	-0.00456727	-0.0252662	-0.0200469	0.0743947
SGTC_644	1498-1197		0.124113	0.00959161	0.0394492	0.0999629	0.104768	-0.0204775	0.131646
SGTC_1409	3909-8004		0.123931	0.0821137	0.0726912	0.0289034	0.059787	0.0734041	0.130225
SGTC_1703	st026983		0.12349	0.131676	0.12017	0.0312022	0.0806216	0.137642	0.049388
SGTC_565	1418-0001		0.122722	-0.00352691	0.0441609	0.041326	0.0146451	0.102437	0.131402
SGTC_2908	7930301		0.122705	0.0387874	0.101371	-0.0306789	0.114451	0.148409	0.0771514
SGTC_1871	st057448		0.122492	-0.0271942	0.00309494	-0.0131803	0.136786	0.169469	0.178164
SGTC_2809	7964133		0.122488	0.0788913	0.0879467	-0.00942305	-0.00733133	0.119771	0.0555435
SGTC_2368	9071271		0.122348	0.0570107	0.00161449	0.00824911	-0.0171158	0.104514	0.0316195
SGTC_2408	sulbentine	An antifungal agent of unknown mechanism.	0.121738	0.0236567	-0.017922	-0.0395761	0.0406376	0.0346307	0.237538
SGTC_1415	3966-0071		0.121706	-0.00637506	-0.0350921	0.107689	0.153224	0.0342902	0.0424801
SGTC_1622	st003707		0.121527	0.0712064	0.0139077	0.027302	0.0892879	0.0859135	-0.0435623
SGTC_2972	9093619		0.12142	-0.00551385	0.0490829	0.211093	0.0870385	0.144956	0.15308
SGTC_746	1095-0025		0.121414	-0.0105436	-0.0139922	0.0181595	0.0301161	0.0445313	0.359386
SGTC_2180	6301957		0.121248	0.0525967	-0.0467549	-0.0450006	-0.0065014	0.0728693	0.242348
SGTC_212	3807-4682		0.121175	-0.0179408	-0.0073357	-0.005715	0.0472513	0.063436	0.485049
SGTC_2045	5106652		0.121152	-0.0209391	0.00380563	0.00430863	0.0171375	0.0530063	-0.00685754
SGTC_1820	st053765		0.121118	0.108317	0.0741218	0.133589	-0.00371767	-0.00124566	0.0514401
SGTC_1162	k048-0130		0.121019	0.031192	-0.0495871	-0.00304864	0.0348443	0.0809816	0.240659
SGTC_150	3970-0969		0.120762	0.0419215	0.141372	0.0568927	0.0557362	0.0173816	0.100037
SGTC_2161	5662504		0.120497	-0.045183	0.000293492	0.0408227	0.0393214	0.0284537	0.304637
SGTC_1453	4237-0541		0.120438	0.121095	-0.0230496	-0.0136316	0.044829	0.0445749	0.145463
SGTC_1579	chlormadinone acetate	AÂ steroidalÂ progestin.	0.120204	0.0259538	0.0582588	0.060311	0.0501001	0.126265	0.178336
SGTC_2845	9003024		0.119986	-0.0369641	0.0602523	0.0252384	0.0377962	0.1406	0.342666
SGTC_2131	toluylene red	A phenazine natural dye and potentional inhibitor of the electron transport chain.	0.119827	0.010271	0.0381424	-0.00462089	-0.0244102	0.0367813	-0.0250299
SGTC_1097	itavastatin	Itavastatin is a specific inhibitor of HMG-CoA reductase. HMG-CoA reductase catalyzes the conversion of HMG-CoA to mevalonate, an early step in cholesterol biosynthesis.	0.119808	-0.0108631	-0.0857852	0.0602642	0.0167687	0.0223548	-0.0577755
SGTC_1639	Lupinine o-methylbenzoicacid ester hydrochloride		0.119714	-0.0713729	-0.0297147	0.1804	-0.0148911	0.0166745	0.0299176
SGTC_2930	9013230		0.1192	0.0269634	-0.00339254	-0.0307471	-0.00182627	-0.0595615	0.253688
SGTC_2277	7947813		0.119159	0.0116793	0.0153138	0.00343482	0.075859	0.00680076	0.436416
SGTC_1688	st021091		0.119065	0.0552414	-0.010118	0.0107449	0.0200757	0.153001	0.0189868
SGTC_185	k048-0037		0.118864	-0.0405279	0.00520281	-0.00011554	-0.0227208	0.0780093	0.167102
SGTC_643	k048-0106		0.118533	-0.00267772	-0.0462199	0.0208633	0.0304381	0.0851226	0.403349
SGTC_2658	polymyxin b sulfate	Polymyxin BÂ (PMB) acts selectively on Gram-negative bacteria by electrostatic and hydrophobic interactions with anionic cell envelope components such as phospholipids and lipopolysaccharides.	0.118495	0.0459552	0.0303196	-0.0220519	0.0856245	0.00150698	0.00130669
SGTC_2549	cedrol	A sedative which affects the nervous system.	0.118152	-0.0300329	-0.0177125	-0.00341512	0.0320662	0.122152	0.163034
SGTC_1926	methyl fluorone black	Reacts with homocysteine.	0.117962	0.038715	0.0726318	0.0121264	0.0550941	-0.0181942	0.00946985
SGTC_443	clozapine	An adrenergic, cholinergic, GABAAÂ andÂ histaminergicÂ receptor agonist.	0.117799	-0.0517552	-0.0282463	0.0317404	0.107659	0.0849475	0.0676565
SGTC_2361	9034121		0.117772	0.0471297	-0.0130786	0.00730123	0.0632568	0.000344549	0.26086
SGTC_1986	st071812		0.117723	0.0890652	0.220939	-0.0548599	0.055842	0.0807192	0.0416681
SGTC_2955	9076254		0.117692	-0.00403634	-0.0433527	0.0058961	-0.0131489	-0.0526085	0.0206798
SGTC_884	0851-0618		0.117573	0.0459864	0.0583103	-0.0447037	0.0711296	0.0356806	0.0578183
SGTC_1207	2099-0101		0.11755	-0.00121998	-0.00939285	-0.000431432	0.0603696	0.180255	0.0882021
SGTC_752	1896-0090		0.117507	-0.0127607	0.0163321	-0.0392414	0.0578531	0.0771671	0.0781455
SGTC_3030	9087619		0.117267	-0.0123423	-0.0535904	0.0263024	0.10345	0.0158476	0.194124
SGTC_2063	5246145		0.117063	0.0350121	-0.0715967	0.0172784	0.0273419	0.0123465	0.0932444
SGTC_2398	5228213		0.117056	-0.00677727	0.00568291	0.112382	0.000565967	-0.0446903	0.0802406
SGTC_2302	7771753		0.117041	0.0147011	0.0552413	0.144942	0.0518409	0.091021	0.0710223
SGTC_3119	9125183		0.116906	0.0119876	0.0906253	0.13224	0.0589337	-0.0389027	0.0585487
SGTC_1701	st028638		0.116619	0.112096	0.0277334	0.0568267	-0.0113133	-0.0164255	0.0276821
SGTC_2224	6650123		0.116311	0.155953	0.0524017	-0.0230451	0.0430348	0.00742052	0.0356184
SGTC_2967	9089538		0.116257	0.0291678	0.0973902	0.0634747	0.157283	-0.0489672	-0.0577175
SGTC_1348	1493-0373		0.115905	0.170332	0.0220694	0.0642235	0.0727612	0.027703	0.0799448
SGTC_925	2064-1272		0.115832	0.0338913	0.0505939	-0.0616496	-0.0130409	0.0776889	0.117896
SGTC_1287	0971-0001		0.115792	-0.0253989	-0.0197883	0.0249605	0.0589382	0.0772206	0.133772
SGTC_708	3448-5400		0.115791	0.0305854	-0.00479828	0.0477235	0.2765	0.0905154	0.168518
SGTC_2002	4023503		0.115723	0.0861867	0.00686592	0.0963894	0.126472	0.0389258	0.12354
SGTC_1502	4534-4282		0.115344	0.0226783	0.0532939	0.0579352	0.0507257	0.0624787	0.0337131
SGTC_1846	st056244		0.115242	0.0130381	0.0351028	0.0123108	0.0843558	0.0510972	0.21208
SGTC_1665	st014639		0.115134	-0.0231011	0.0193465	0.0205304	0.0796593	0.0356413	0.308173
SGTC_254	nsc-64875		0.115101	-0.0431777	-0.0338345	0.0321821	0.012814	0.0115683	0.0686455
SGTC_2869	9037858		0.115016	-0.0379747	0.0207121	0.0121541	0.0299091	0.00571044	0.00219794
SGTC_325	2810-4341		0.114961	0.0569411	0.0240508	-0.0111882	0.140497	0.134572	0.177423
SGTC_1046	2001-0062		0.114843	0.125613	0.107403	-0.0242335	-0.0031391	-0.0124872	0.0867538
SGTC_2092	5303694		0.114687	-0.00059356	0.0610094	0.0366717	0.0255738	0.0598229	0.235034
SGTC_3231	9132313		0.11467	0.0400966	0.037144	-0.00296937	0.040269	0.0676302	0.175242
SGTC_182	3448-4371		0.114621	0.0618649	0.0161477	0.013815	0.0231847	0.025357	0.0175116
SGTC_1055	3448-0672		0.114597	0.036155	0.0597454	0.080851	-0.0351189	0.0944797	-0.00517223
SGTC_1148	3909-7663		0.114502	-0.0111458	0.0883301	0.017353	0.0908263	0.0111926	0.162963
SGTC_1285	0929-0069		0.114462	0.157958	0.00216141	0.11506	0.0472424	-0.00732504	0.0870653
SGTC_1468	k284-1086		0.114314	0.0588657	0.0352109	-0.0344329	0.00617498	0.120285	0.199356
SGTC_827	3253-0474		0.11422	0.0791433	-0.0139816	0.0684234	0.0330801	-0.00123705	0.00479199
SGTC_48	0382-0018		0.114012	0.063139	0.174631	0.0865197	0.187093	0.0174155	0.0488484
SGTC_2503	beta-caryophyllene alcohol	An anti-inflammatory.	0.113888	0.129471	0.0272218	-0.0377635	0.0765131	0.00558711	0.0297941
SGTC_689	0833-0039		0.113795	-0.0245475	-0.0280375	0.180523	-0.0560964	-0.0690677	-0.077693
SGTC_2746	daunorubicin	Daunorubicin forms complexes with DNA by intercalation between base pairs, thereby preventing DNA replication. Additionally, doxorubicin inhibits topoisomerase II activity by stabilizing the DNA-topoisomerase II complex, preventing the religation portion of the topoisomerase II reaction.	0.113621	-0.024499	0.0737063	-0.00109493	0.179292	0.0339824	0.172514
SGTC_424	splitomicin	Sir2p (silent information regulator) and HDAC inhibitor.	0.113584	0.0528932	0.214771	-0.00321214	0.0071816	0.0804148	0.0186489
SGTC_1050	3232-1156		0.113341	0.00296305	0.0183336	-0.0374585	0.0822512	0.0830146	0.586291
SGTC_1511	0906-3109		0.113323	0.0464586	0.00293872	-0.0173508	0.0023393	0.107205	0.159529
SGTC_508	roscovitine	A CDKinase inhibitor.	0.113318	0.0204631	-0.00596498	0.131252	0.000362269	0.0906481	0.12923
SGTC_2023	5144124		0.113093	-0.00980123	-0.0223695	0.067348	0.050486	0.0856772	0.136927
SGTC_1215	3852-0577		0.112964	-0.00798635	-0.0346995	0.0927224	-0.0075511	0.0768923	0.0199208
SGTC_3059	1327-0034		0.112921	0.0295941	0.0144037	-0.0259335	-0.00887292	0.0267358	0.239122
SGTC_264	promethazine	Promethazine is a Na+ channel blocker.	0.112917	-0.0114462	0.0392093	0.0558262	0.107455	0.0554981	0.100748
SGTC_1542	7-hydroxy-3'-methoxyflavone		0.112877	0.143856	-0.0506173	0.0927693	0.0218605	0.0232728	-0.00208108
SGTC_1354	1498-1681		0.112701	0.0246263	-0.00159301	0.046069	0.136069	0.0438887	0.0995294
SGTC_2459	5811157		0.112667	0.0318977	-0.00157252	-0.0375698	0.0627825	0.0405956	0.116773
SGTC_1017	4239-0030		0.112488	0.128176	0.115159	0.0357525	0.173849	0.0750277	0.0559061
SGTC_829	1635-0120		0.112477	-0.00394352	0.0415175	-0.00715738	0.122707	0.0524466	0.41306
SGTC_1457	k015-0032		0.112436	0.0689848	0.0778322	0.00378448	0.106174	-0.0199699	0.13457
SGTC_3201	9113999		0.112393	-0.0202069	0.070256	-0.0310639	0.0770073	0.0269837	0.186105
SGTC_2303	7774051		0.112368	0.0629422	-0.00836989	-0.052929	0.0738574	0.0354646	-0.0416316
SGTC_2988	9073640		0.11227	0.00826677	0.203684	0.0383082	0.11783	0.123301	0.200372
SGTC_3101	9120531		0.112247	0.0533585	0.0206054	0.00672075	0.0434301	0.0745148	0.130605
SGTC_412	gemfibrozil	A peroxisome proliferator-activated receptor activator which lowers lipid levels.	0.11224	0.212628	0.0355891	-0.0478726	0.0657733	0.00475711	-0.0288596
SGTC_2729	fluphenazine	An atypical antipsychotic.	0.111937	-0.00487723	0.0494446	-0.000151082	0.0913521	0.173436	0.0932464
SGTC_55	0767-0285		0.111898	0.0183479	0.131497	0.00197684	0.00209133	0.00629561	-0.0176494
SGTC_2115	tiliquinol	A bioactive hydroxyquinoline.	0.111892	-0.0204688	-0.00619681	0.0299046	-0.0542187	0.00878302	0.146068
SGTC_739	1486-1183		0.111717	0.0135333	0.0907467	-0.00158455	0.0439351	0.0176497	0.0117896
SGTC_58	0957-0393		0.111494	0.004813	-0.0196559	-0.0225155	0.0160361	0.11434	0.249294
SGTC_1931	st074438		0.111486	0.0118565	-0.0060129	0.121554	0.185865	0.0171077	0.154696
SGTC_3017	9080681		0.111246	0.0535452	0.135909	0.052788	0.0835015	0.0640586	0.0650954
SGTC_1991	st073000		0.111118	0.0234767	-0.00642804	0.00787695	0.0934948	0.0256891	0.186026
SGTC_3294	9122953		0.111053	0.0568013	0.0456698	-0.00787422	0.0252717	0.0210167	0.272648
SGTC_2773	thioridazine	An antipsychotic.	0.110947	-0.0124605	0.0239775	0.0258331	0.0501177	0.0706687	0.0167738
SGTC_2881	9058953		0.110787	0.020193	-0.00986654	0.0993976	0.0715103	0.00509593	0.0847583
SGTC_3050	9093513		0.110673	0.0367313	0.0523267	-0.0823323	0.0896882	0.0589677	0.00618331
SGTC_2705	st078069		0.110569	0.0610259	0.0257019	0.00729435	0.0661803	0.071969	0.0743062
SGTC_1783	st039459		0.110564	-0.02331	-0.0297964	-0.037014	0.0954377	0.0617962	0.197801
SGTC_3328	9140624		0.110417	0.0334232	0.0301281	0.0261461	-0.0195932	0.156496	-0.0177586
SGTC_3070	9117005		0.110296	0.0602389	0.0536308	0.0500213	0.0509894	0.0399449	0.0795259
SGTC_2595	hexamethylquercetagetin		0.110143	0.0674575	-0.0352007	-0.0264189	0.0838362	0.171132	0.138917
SGTC_324	1315-0088		0.110081	-0.0102706	-0.0154937	0.00850498	0.0449453	0.0210076	0.347849
SGTC_661	1304-0007		0.110042	0.0363091	-0.00625572	-0.00675594	0.0800791	0.0821984	0.134767
SGTC_1003	4049-0218		0.110008	0.0671632	-0.012945	0.0459364	0.053049	0.0209611	0.138482
SGTC_17	0960-0276		0.109863	0.0472015	0.0280367	0.00664413	0.0468519	0.0812338	0.0603504
SGTC_61	0978-8327		0.109813	0.0104006	0.00889512	-0.0241277	0.0321231	0.105184	0.385248
SGTC_3215	9129942		0.109718	0.0191598	0.0701159	-0.0239383	0.136029	0.0358325	0.0482696
SGTC_1841	st054148		0.10951	0.0190424	0.111685	0.0662345	0.0265243	0.130791	0.0649945
SGTC_1637	st007924		0.109365	0.10143	0.00742154	-0.0610225	-0.0151391	0.0261151	0.0897117
SGTC_2264	7948757		0.10931	-0.0318103	0.0615385	-0.0354647	0.0591399	0.120546	0.0630848
SGTC_1515	3460-0031		0.109235	0.0705366	0.0605776	0.0905149	0.0378572	0.0773564	0.00256455
SGTC_1222	0366-0074		0.10919	0.00833041	0.0153883	0.074736	0.0598029	0.0948045	0.085345
SGTC_3314	9135860		0.108929	-0.0178438	0.116655	-0.026783	-0.00178311	0.113262	0.0850284
SGTC_2176	5809774		0.108645	0.0601661	0.129217	0.0492449	0.0836922	0.000257369	0.139669
SGTC_2323	6148992		0.108567	0.00138813	-0.0525698	0.150862	-0.0263654	0.0579335	0.0732895
SGTC_456	gingerol	A herb.	0.108553	0.0627568	0.0287407	0.0231177	0.00258425	0.0463063	0.030885
SGTC_789	1309-1135		0.108496	-0.0142644	-0.00219683	0.0568788	0.0334224	0.0477904	0.116609
SGTC_2487	5918373		0.108363	-0.0175054	0.0182226	-0.0207143	-0.00841958	0.0518931	-0.0218131
SGTC_1642	st009582		0.108356	0.0352244	0.0415661	-0.00541283	-0.0095657	0.0584108	0.10733
SGTC_3302	9125395		0.108293	0.0369153	0.100476	0.0192628	-0.0114455	0.0798912	0.0209913
SGTC_2374	9071832		0.108148	0.0291823	0.126064	0.0390896	0.0159033	0.0455997	-0.0197599
SGTC_113	0099-0221		0.107981	0.0968203	0.0228254	-0.0264048	-0.0381237	-0.013494	-0.0688551
SGTC_203	k066-0004		0.107948	-0.00598757	-0.0136192	0.00055852	0.0670706	0.0759715	0.359459
SGTC_3345	9148410		0.107868	-0.0420761	-0.0332585	-0.00432615	-0.0426341	0.0384776	0.0861539
SGTC_1326	1431-2094		0.107789	-0.0150074	0.0127445	0.0192095	-0.00014262	-0.00254527	0.38706
SGTC_257	daunorubicin	Daunorubicin forms complexes with DNA by intercalation between base pairs, thereby preventing DNA replication. Additionally, doxorubicin inhibits topoisomerase II activity by stabilizing the DNA-topoisomerase II complex, preventing the religation portion of the topoisomerase II reaction.	0.107695	0.00418171	-0.0291887	-0.0331118	0.0803164	0.0736841	0.388384
SGTC_2450	5739737		0.10752	0.0760334	-0.0278454	0.0827331	0.0168307	0.013935	-0.0266604
SGTC_2280	7785178		0.107517	-0.0213472	0.045426	-0.0520393	0.0964248	0.0429247	0.128299
SGTC_722	3534-0461		0.107494	0.0195109	0.026617	0.0304671	0.0857837	0.0588189	0.0781966
SGTC_641	4092-0595		0.107287	-0.00139468	0.0080212	0.0469948	0.189571	0.0342358	0.0717002
SGTC_1391	3442-0225		0.10728	0.0406137	-0.0407877	0.0313563	0.0914712	-0.0281566	0.110193
SGTC_3192	9110362		0.107042	0.123599	-0.0171555	0.0840478	0.0512963	0.0741432	0.0726448
SGTC_1527	apigenin	Natural flavone that has been found to inhibit cell proliferation by arresting the cell cycle at the G2/M phase.	0.10686	0.124538	-0.0318617	0.0183615	0.11561	0.0518299	0.168117
SGTC_120	rhodamine 6G	Rhodamine 6G is a noncompetitive inhibitor of F0F1-ATPase	0.106687	0.0432033	0.0104031	-0.0229942	0.0223935	0.116641	0.18285
SGTC_1363	1636-0063		0.106667	-0.0331929	0.0856444	0.0315815	0.171545	0.114623	0.148533
SGTC_2412	st077135		0.106665	0.0131995	-0.0471277	-0.0303562	0.0257101	0.0914685	0.137485
SGTC_1523	st012844		0.106507	-0.00123569	-0.00526086	-0.00259699	0.0103732	0.18847	-0.00142683
SGTC_427	1354-0053		0.106492	-0.0183382	0.109336	-0.00204248	0.0309634	0.0591253	0.0136244
SGTC_2058	5236698		0.106426	-0.00944669	0.100174	0.0319337	0.0881005	0.0123204	0.0461251
SGTC_1460	k062-0059		0.106397	-0.0392167	0.081934	0.0926315	0.0837464	0.0591032	0.0477151
SGTC_2928	9011484		0.106371	0.00772841	0.0164727	0.00673374	0.0352279	-0.00484778	0.349099
SGTC_3010	9080089		0.106342	-0.00301043	0.0593534	-0.0718876	0.00419894	0.262013	0.0404135
SGTC_1470	k295-0292		0.106055	0.0278249	0.0267194	-0.0516073	0.00921783	0.0405498	0.0839177
SGTC_379	3970-0972		0.105685	-0.0314784	0.00773634	-0.000342787	-0.00186861	0.0189543	0.220423
SGTC_871	0574-0004		0.105644	0.015867	0.0105199	-0.0211749	0.0337592	0.0621586	0.528758
SGTC_380	3970-0968		0.105243	0.0278221	0.0277831	0.0537294	0.0739805	0.00135209	0.0283836
SGTC_870	0573-2213		0.105058	0.0205133	-0.030586	0.203315	0.105075	0.0510573	0.151955
SGTC_1624	st003710		0.105015	0.0262115	-0.076835	0.115136	-0.0380569	0.0463064	0.0123253
SGTC_1911	st060208		0.104988	0.0842132	0.0323187	0.100972	0.158187	0.0465486	0.0373372
SGTC_2441	5730946		0.104863	0.0661941	-0.00441762	-0.0714596	0.0677427	0.0793793	0.0607147
SGTC_1290	0986-0249		0.104753	0.0166262	0.116938	0.015855	0.147705	0.0168068	0.048256
SGTC_2233	sulbentine	An antifungal agent of unknown mechanism.	0.104729	0.0597107	0.0181011	-0.0322997	0.0563078	-0.00402995	0.243665
SGTC_1640	st009078		0.104638	-0.0220952	-0.03441	-0.0560922	-0.00612712	0.104757	0.148331
SGTC_1014	4130-3005		0.104537	-0.0271492	0.00833766	0.042566	0.0461906	0.0319004	0.0461154
SGTC_2547	epiafzelechin trimethyl ether	An antioxidant.	0.104355	0.00276523	0.0537865	0.0422053	0.038591	0.0363312	0.0313414
SGTC_485	niflumic acid	A COX2 inhibitor.	0.104328	0.00666577	-0.0517351	0.147521	0.0223753	0.0451381	0.0437839
SGTC_927	2425-1185		0.104127	0.0249049	0.0351751	-0.0521744	0.0564905	0.200931	0.149745
SGTC_2984	9022109		0.104099	0.246723	-0.00906334	-0.0138192	0.0180272	0.00648208	-0.020022
SGTC_961	1252-1571		0.104077	0.103516	-0.0136615	0.00678022	0.0799006	0.0998899	0.0625499
SGTC_194	1486-1323		0.104052	0.0889001	-0.0457089	0.0296684	0.0440872	0.0297095	-0.000244575
SGTC_136	0097-0015		0.103999	0.0490459	0.0488576	-0.0669824	0.0119755	0.1364	0.0289852
SGTC_3327	9140648		0.103848	-0.0614396	-0.0337482	0.0546634	0.0254524	0.150151	0.124395
SGTC_1904	st060225		0.103837	0.00712443	0.0362021	0.0792308	0.0981456	0.0194602	0.0591674
SGTC_2475	5812728		0.103641	0.0340317	0.0226361	-0.0202511	0.092332	0.0911368	0.0211077
SGTC_1155	4088-0394		0.103632	-0.0333097	0.0432114	0.0594276	0.0791694	-0.0472472	0.0848497
SGTC_2801	7907800		0.103307	-0.0366204	0.0389993	0.0745781	0.0271304	-0.0753888	-0.00592706
SGTC_1045	1348-1485		0.103288	0.122704	0.256682	-0.000652294	0.148751	-0.00159555	0.0517694
SGTC_558	k064-0027		0.103123	-0.0191225	0.0160154	-0.0024209	0.131844	0.0881416	0.26464
SGTC_195	4234-0266		0.103104	0.121342	0.0721626	0.0304149	0.0425833	0.0409129	0.000766189
SGTC_878	0828-0289		0.103	0.0198126	-0.000300142	0.0524288	0.0080974	0.0703799	0.0593576
SGTC_3337	9144342		0.102889	0.0127016	-0.00399603	0.0695408	0.0697399	0.100015	0.203253
SGTC_2879	9041815		0.10266	0.0603672	-0.0652288	0.12216	0.00654743	0.0268989	0.105249
SGTC_2614	arthonioic acid		0.102386	0.0902955	0.0454812	0.0029221	0.109476	0.0419497	0.0883167
SGTC_2732	terfenadine	A selective histamine H1-receptor antagonist devoid of central nervous system depressant activity.	0.102123	-0.0265393	-0.00434399	0.150336	0.0359451	-0.0211445	0.00381532
SGTC_947	3447-0010		0.101993	0.0567785	0.0509033	-0.0739613	0.0444108	0.157913	-0.00552797
SGTC_853	0419-0306		0.101951	0.0429425	-0.0488481	-0.0178374	0.106733	0.177713	0.178095
SGTC_3259	9138485		0.101899	0.0234588	0.127454	-0.00629772	0.0603813	0.103891	0.0550893
SGTC_197	4544-0043		0.101879	-0.0197654	-0.0377896	0.0717081	-0.0203537	0.0300713	0.113954
SGTC_3031	9088762		0.101782	-0.0188995	-0.00607845	0.0142665	0.0886268	-0.0197675	0.108586
SGTC_2662	daunorubicin	Daunorubicin forms complexes with DNA by intercalation between base pairs, thereby preventing DNA replication. Additionally, doxorubicin inhibits topoisomerase II activity by stabilizing the DNA-topoisomerase II complex, preventing the religation portion of the topoisomerase II reaction.	0.101466	0.0279386	0.00476351	-0.0223633	0.0840106	0.0440182	0.356514
SGTC_93	0109-0045		0.101372	-0.0157771	0.0453461	-0.0101354	0.154152	0.0656736	0.480584
SGTC_2813	7971799		0.10122	-0.00589401	0.0465535	-0.0703241	0.0693475	0.202701	0.17361
SGTC_329	k048-0121		0.100958	-0.0108432	-0.0119547	0.00665238	0.0104528	0.0513937	0.273387
SGTC_761	k216-0224		0.100809	0.0594276	-0.0331362	0.0814621	0.0772947	0.0343335	0.045181
SGTC_1992	st073643		0.100411	-0.00884989	-0.0768457	0.0675571	0.0459812	0.0781729	0.410552
SGTC_1044	1222-0021		0.100322	-0.00885175	0.0101624	-0.00603121	0.00256147	0.0128372	0.304099
SGTC_350	k064-0020		0.100294	0.0338001	0.00840412	0.0369388	0.0525706	0.0160341	-0.0213277
SGTC_1516	st013856	A mutagen and neurotoxin.	0.0999914	-0.000179459	0.0576379	0.0387874	0.167563	0.150525	0.064558
SGTC_346	4513-0042		0.0999471	0.039355	0.141183	0.0911538	-0.0487675	-0.0652014	-0.0283551
SGTC_2258	7960471		0.0998129	0.0081862	0.0417179	0.0510977	0.056949	0.120468	0.177467
SGTC_1830	st055982	An antimicrobial agent.	0.0997727	-0.0313529	0.0366144	0.0369206	0.0918873	0.0157164	0.0253486
SGTC_2400	5203494		0.0994739	-0.0135208	-0.0284856	-0.0205036	0.027028	0.0549259	0.318532
SGTC_1661	st013063		0.0994594	0.052672	0.175448	0.0121121	-0.0222324	-0.0265849	0.114101
SGTC_566	0958-0068		0.0994567	-0.00701555	-0.0310763	0.00809532	0.026597	0.072607	0.369825
SGTC_1137	ixabepilone	A novel microtubule stabilizer.	0.0994528	0.0216205	0.0111241	0.018571	0.0250211	0.155588	0.403196
SGTC_1299	1079-1439		0.0992853	0.0208397	-0.0730246	-0.0426894	0.000185431	0.0770666	-0.0166637
SGTC_2027	5150920		0.0992087	-0.0468203	0.0123777	-0.0232965	0.0491834	-0.00948251	0.126183
SGTC_2296	7971656		0.098981	0.0740428	0.039658	-0.0323725	0.0558157	0.0781731	0.0271184
SGTC_488	nitrendipine	Dihydropyridine L-type calcium channel blocker.	0.0989539	-0.0185172	0.0086841	0.109897	0.041371	0.0219957	0.095695
SGTC_583	1488-1091		0.0986884	0.0585592	-0.0217804	-0.00112831	0.00581851	0.0143899	0.0446191
SGTC_1465	k213-0056		0.0985674	-0.0212613	0.0335835	0.042243	0.0889377	-0.025404	0.0886321
SGTC_2629	bisabolol	A monocyclic sesquiterpene alcohol; an anti-infammatory and apoptosis inducer.	0.0985272	-0.0427779	-0.0354246	0.0299228	0.056343	-0.0157904	-0.0208483
SGTC_88	0180-0332		0.098491	0.0183925	0.0559748	-0.063974	0.063382	0.0830264	0.123942
SGTC_1856	st057054		0.0984797	0.0323242	-0.0211756	0.0755274	0.0147432	0.0267887	-0.00156923
SGTC_2657	nystatin	Nystatin is a polyene antifungal that binds irreversibly to ergosterol, resulting in disruption of membrane integrity and ultimately cell death.	0.0983816	0.0121841	0.105239	-0.00696255	0.1064	0.0675235	0.0273016
SGTC_239	5hr heat shock (37 degrees C) + mitomycin C	Mitomycin is a bifunctional and trifunctional alkylating agent, cross-links DNA inhibiting DNA synthesis and function. Mitomycin is cell cycle phase-nonspecific.	0.0983072	-0.0402712	0.0245906	0.0521014	0.0766798	0.130457	0.066263
SGTC_2109	5483026		0.0982217	-0.00478475	-0.00415651	0.00503891	0.0977008	0.056693	0.386803
SGTC_2820	7989630		0.0982111	-0.0037448	-0.0785345	0.152826	0.0228423	0.12262	0.106335
SGTC_2826	7992541		0.0981989	-0.00281231	0.0305956	-0.0089483	0.091465	0.0540259	0.0269424
SGTC_253	dyclonine	An oral anasthetic.	0.0981896	0.0426905	0.0814876	-0.00907381	-0.00886026	-0.0117567	0.00184669
SGTC_828	2074-0507		0.0980897	0.00582444	-0.013867	0.115179	-0.0252994	0.0263622	0.134647
SGTC_2489	cantharidin	Cantharidin is a toxic blistering agent secreted by the Spanish fly of unknown mechanism. In Saccharomyces cerevisiae, cantharidin is thought to act by inhibiting GLC7 (encoding type 1 serine/threonine protein phosphatase) as decreased expression confers hypersensitivity and overexpression confers resisitance (Hoon et al., Nat Chem Biol 4, 2008).	0.0980616	-0.0182424	0.0422182	0.0283331	0.110424	0.0782476	0.404873
SGTC_633	0437-0093		0.0980083	0.00627426	-0.0433796	0.160807	0.047868	0.0211576	0.0277328
SGTC_2110	5483698		0.0979699	0.0865125	0.0275019	0.147887	0.0434443	0.0598515	0.107466
SGTC_3151	9099821		0.0978845	0.0318317	0.0259702	0.0752128	0.113	0.105356	0.10093
SGTC_2893	9048488		0.0977948	0.0066957	-0.0177581	0.245163	0.11229	0.046319	-0.00945151
SGTC_2325	6158266		0.0977382	0.0493318	-0.0250886	0.155901	0.103592	0.0159185	0.097926
SGTC_2715	st079500		0.0977337	0.0246451	-0.072818	0.132585	0.00426868	-0.0395182	0.0060494
SGTC_3052	9092717		0.097603	0.0777928	0.0571342	0.167404	0.179757	-0.0210426	0.142161
SGTC_342	k048-0088		0.0974199	0.00377499	0.012724	0.0159597	0.0061311	0.0447727	0.300627
SGTC_602	3130-1533		0.0969939	0.0211119	-0.0760333	0.0642793	0.0338451	0.131865	0.112595
SGTC_2696	st077691		0.0968438	0.0421609	-0.0479373	0.0127443	0.014561	0.0612118	0.23474
SGTC_3250	9135583		0.0967671	0.12973	0.0160989	0.0579664	0.0653217	0.0997962	0.0985507
SGTC_2071	5230951		0.0966415	-0.00973494	-0.0113325	-0.0249093	0.0284938	0.0974174	0.287886
SGTC_1446	4239-0190		0.0966303	-0.0322485	0.0118951	-0.0405562	0.0884141	-0.0222103	0.212199
SGTC_795	0685-0265		0.0965421	-0.0220863	0.0346795	0.0186237	0.105904	0.142706	0.145756
SGTC_2375	9072683		0.0964657	0.0682711	0.122867	-0.0127899	0.0591406	0.0159357	0.217179
SGTC_1533	dihydroergotamine mesylate	A 9,10alpha-dihydro derivative of ergotamine. It is used as a vasoconstrictor, specifically for the therapy of migraine disorders. [PubChem] DrugBank Mode of Action: Two theories have been proposed to explain the efficacy of 5-HT<sub>1D</sub> receptor agonists in migraine: 1) activation of 5-HT<sub>1D</sub> receptors located on intracranial blood vessels, including those on arterio-venous anastom…	0.0963955	0.00919979	-0.0472722	0.00720013	0.0780337	0.0576077	0.105048
SGTC_1497	4476-2978		0.0963567	0.000282352	0.0612	-0.0866897	0.0607858	0.0539477	0.132408
SGTC_451	chloral hydrate	Chloral hydrate is an aldehyde dehydrogenase (ALDH) inhibitor.	0.0961452	-0.00332572	-0.00995252	0.123453	0.0848513	0.0253035	0.138209
SGTC_2759	disulfiram	Disulfiram blocks the oxidation of alcohol through its irreversible inactivation of aldehyde dehydrogenase.	0.0960718	0.0129061	0.002988	-0.0276516	0.0504025	0.0183927	0.124999
SGTC_118	0083-0097		0.0959842	0.0399654	0.00485588	0.0687429	0.343802	0.0393092	0.121544
SGTC_1259	0671-0132		0.0959742	0.0623177	0.0444139	0.0367308	0.0120952	-0.00743674	-0.00194909
SGTC_2316	5844804		0.0958885	0.0365741	0.0444651	0.00396774	0.00443688	-0.0365566	-0.000579109
SGTC_1758	st042942		0.0957859	-0.041244	-0.0574966	0.0816706	0.00481585	0.00253475	0.0246442
SGTC_2378	9074213		0.0957691	0.00241878	-0.014418	-0.00486413	0.0653534	0.0469223	0.466232
SGTC_300	r073-0011		0.0956484	-0.0417821	0.13733	0.00607901	0.0515379	0.00706441	0.0995042
SGTC_2951	9072950		0.0956359	0.0103333	-0.126031	0.0775081	0.0772288	-0.0112329	0.0329488
SGTC_859	0439-0102		0.0955681	0.0672621	0.0577934	0.0665238	0.0303894	-0.0474549	-0.018714
SGTC_1295	1013-0063		0.0955656	0.0245057	0.0401332	0.1046	0.0309822	0.0317947	-0.0231668
SGTC_159	3970-0959		0.0955168	0.0413815	0.24138	0.0267161	0.0634737	0.095112	0.12173
SGTC_783	0848-0141		0.0955044	0.00230271	-0.0239811	-0.0266119	0.03837	0.0806327	0.369702
SGTC_2061	5245884		0.0954829	-0.0249848	0.0490004	-0.0187443	0.098248	0.0487932	0.352934
SGTC_3270	9137563		0.0954411	-0.0352643	-0.0461711	-0.040039	0.0219871	0.102629	0.077359
SGTC_2163	5671233		0.0953919	0.0872024	-0.0125213	-0.0393374	0.0260084	0.0410277	0.122955
SGTC_1212	0520-0165		0.0952363	-0.0138627	0.0227009	-0.0122271	0.0205739	0.123009	0.0257316
SGTC_2154	5570129		0.095202	0.00939955	0.0514187	0.0277743	-0.00744731	-0.01595	0.0755349
SGTC_1243	0416-0003		0.0951709	0.0113405	0.0201014	0.00032437	0.109511	0.0363356	0.101915
SGTC_915	methyl methanesulfonate (MMS)	MMSÂ is a DNA alkylating agent; methylatesÂ DNA on N7-deoxyguanine and N3-deoxyadenine inducing DNA damage and stalling of replication forks.	0.0951587	-0.0253805	0.0736623	0.0280179	0.196345	0.0370173	0.0825148
SGTC_532	1548-0774		0.0949862	-0.0241126	-0.0173752	-0.00734734	0.00855323	0.14206	-0.0151208
SGTC_3110	9122132		0.0949844	-0.0155958	0.0698994	0.0265516	0.00397578	-0.0183086	0.342293
SGTC_1164	k060-0068		0.0948723	-0.0336569	-0.0122799	-0.0573528	0.00465674	0.113969	0.0360904
SGTC_347	4534-1311		0.0948619	0.0709414	0.0307161	0.0542185	0.00740673	0.062005	0.0572305
SGTC_1398	3558-0053		0.0948588	0.0380896	0.00861042	0.0520498	0.0172293	0.00169312	-0.021256
SGTC_672	1441-0018		0.0948182	-0.0314221	0.130234	-0.023802	0.0706014	0.0912794	0.0414352
SGTC_2344	7990960		0.0946881	0.0110979	-0.0334268	-0.0114774	0.05209	0.0771439	0.353979
SGTC_2949	9072542		0.0946277	0.0284856	0.032866	0.0102138	0.0802472	0.00676135	0.223806
SGTC_216	k038-0035		0.0944573	0.00644045	0.0118265	-0.0190305	0.00212209	-0.0123279	0.249843
SGTC_2396	5342950		0.0944122	0.0372861	-0.00134172	-0.012474	0.0298734	0.0530889	0.389918
SGTC_2362	9071156		0.0943809	0.0667998	0.00536734	-0.0633217	0.0281664	0.00308104	0.0782175
SGTC_920	mycophenolic acid	Mycophenolic acid is a potent reversible inhibitor of IMPDH (inosine monophosphate dehydrogenase), leading to a depletion of GMP and inhibition of de novoÂ synthesis of purines. The resulting imbalance of nucleotide pools also results in inhibiting transcription-elongation.	0.0942548	0.0127852	0.0626518	0.0667065	0.138297	0.0994595	0.109692
SGTC_1142	3253-1408		0.094032	-0.0199941	0.113754	0.0275709	0.0131374	0.135999	0.09564
SGTC_3039	9090270		0.0939744	0.0500781	-0.0923341	-0.018163	-0.0544816	0.165762	0.0883827
SGTC_2229	7354935		0.0939299	0.0191074	-0.0159435	0.0149807	0.0594147	0.0811683	0.380786
SGTC_2952	9073731		0.093898	-0.0143746	-0.103821	0.0470985	-0.00071314	0.0245215	0.104237
SGTC_2542	2-hydroxy-5 (6)epoxy-tetrahydrocaryophyllene		0.0938817	0.0783372	0.00995217	-0.0381624	0.0065542	0.0765147	-0.0488459
SGTC_635	k038-0028		0.0938463	-0.0128575	0.0112565	0.000242131	-0.0197899	-0.0123042	0.130623
SGTC_3085	9117376		0.0938124	0.0287421	-0.0372265	0.00385195	0.110552	0.119337	0.0326721
SGTC_3263	9137018		0.0938083	0.0233743	0.0656337	0.066931	0.102853	0.0768424	0.0512424
SGTC_281	1672-3440		0.0937992	0.13291	-0.0352504	0.00471584	0.0212009	0.0897578	0.0912467
SGTC_188	3229-0966		0.0936909	0.0162186	0.0635931	0.00877612	0.0605593	0.138957	0.0290857
SGTC_3197	9113331		0.0936266	-0.00146203	0.105283	0.0105931	-0.0504478	0.0824853	0.100128
SGTC_509	pifithrin	A p53 inhibitor.	0.0933509	-0.00628788	-0.00475305	-0.00591641	-0.0426166	0.0807935	0.146801
SGTC_3094	9117742		0.0932415	-0.00702917	-0.0251951	0.0919541	0.126248	0.0688349	0.105653
SGTC_2322	7413319		0.0930956	-0.00202036	0.0243298	0.00971322	0.0372838	0.0312439	0.173443
SGTC_1133	3473-0247		0.0930035	-0.00488839	-0.0278308	-0.0291952	0.0223826	0.0621297	0.345264
SGTC_442	cape		0.0929782	0.00443788	-0.0850152	0.00780502	0.0167878	0.0121689	0.0648031
SGTC_2106	5357045		0.0926574	0.125074	-0.0668491	0.0145041	-0.00581018	0.0796154	0.0416948
SGTC_1428	4049-0204		0.09258	0.0324836	0.0500603	0.0593868	0.0482668	0.0314166	0.243994
SGTC_96	0929-0093		0.0925266	0.0153466	0.00659709	0.0242231	0.0792786	0.0176093	-0.0128073
SGTC_1620	st003704		0.0924012	-0.00388446	-0.0474849	0.0136476	0.0167491	0.115527	0.022827
SGTC_101	0490-5701		0.0923621	-0.0210026	-0.0192914	0.345234	0.0361813	0.0774976	0.0342956
SGTC_2802	7925815		0.0923543	0.0281355	0.0891363	0.157521	0.0855617	0.0390094	0.0636251
SGTC_673	1082-0474		0.0921969	0.0169529	0.0103156	-0.0020943	0.118249	0.0598112	0.477452
SGTC_398	bronopol	Metabolized to formaldehyde. Reacts with secondary amines and cross-links them.	0.0921603	0.0174384	-0.054429	0.043474	0.0106883	0.141357	0.214881
SGTC_2864	9034755		0.092008	-0.0114422	0.114253	0.0332394	0.0486193	-0.0317649	0.209572
SGTC_680	0417-1641		0.0918114	0.0551682	0.0924463	0.0521764	0.220701	0.0411918	0.0505149
SGTC_2492	derrusnin	Part of coumarin class of compounds.	0.0915304	0.0111244	0.0621076	-0.0380366	-0.0168137	0.021913	0.0240537
SGTC_204	1543-0184		0.0914602	0.0982369	-0.00338012	0.0433676	0.0294688	0.00504843	-0.0446207
SGTC_1085	doxorubicin	Doxorubicin forms complexes with DNA by intercalation between base pairs, thereby preventing DNA replication. Additionally, doxorubicin inhibits topoisomerase II activity by stabilizing the DNA-topoisomerase II complex, preventing the religation portion of the topoisomerase II reaction.	0.0913294	0.0102488	0.095784	0.0344388	0.14921	-0.018615	0.206478
SGTC_796	1234-0020		0.0911859	-0.00859564	0.0332585	-0.0452705	-0.0044491	0.186188	0.156452
SGTC_140	0062-0056		0.0908552	-0.0248681	-0.0422744	-0.0369233	0.126215	0.133649	0.140518
SGTC_62	0180-0423		0.0907501	0.0213393	-0.0288553	-0.0176948	0.126414	0.101986	0.0608473
SGTC_2346	9031566		0.0906565	-0.00503084	0.013479	-0.017532	0.0925381	0.0475502	0.482988
SGTC_18	0111-0177		0.0905887	0.0194756	0.0282451	0.0779419	0.0325923	-0.0149947	0.0591837
SGTC_2251	lansoprazole	Gastric proton pump inhibitor.	0.0905763	0.00134687	-0.0240288	0.00695885	0.0184924	0.129374	0.0406719
SGTC_152	4469-0003		0.0905608	0.12852	0.0690842	0.0115416	0.0847351	0.0376696	0.0609472
SGTC_2692	st077426		0.0904579	0.0365451	-0.0548642	0.0715243	-0.0218324	-0.0418697	0.0367097
SGTC_1432	4049-0298		0.0903695	-0.0637759	0.037828	0.0116704	0.0436447	0.111983	0.139646
SGTC_2427	5545055		0.0903335	-0.032075	0.0610894	-0.0306406	0.0576752	0.140514	0.151547
SGTC_3147	9097027		0.0902765	-0.0128275	-0.0223373	-0.003564	0.0413627	0.02356	0.028461
SGTC_2193	5925765		0.0902458	0.0725152	0.0621766	-0.0407875	0.0465235	0.102789	0.0950759
SGTC_430	0958-0115		0.0901483	-0.0309224	-0.00958436	0.0320668	0.0526497	0.114416	0.183492
SGTC_1179	1021-1431		0.0901192	0.0826538	-0.0421222	0.0495075	0.0369449	0.0347001	0.0850136
SGTC_1237	0330-0133		0.0897649	0.0583552	0.0745279	0.00440027	0.0503878	-0.0411222	0.063759
SGTC_2187	6125751		0.0896331	-0.00280251	-0.0452966	0.092336	0.127263	0.0950966	0.327477
SGTC_1379	2144-0755		0.089596	0.0389594	0.196675	-0.0290051	0.0394801	0.106562	0.158848
SGTC_1606	st000094		0.0895839	-0.0265003	-0.0190466	0.029121	0.0947735	0.109847	0.157366
SGTC_3042	9091578		0.0895528	-0.0372784	-0.0816189	0.0548143	0.0126952	0.0578799	-0.0328388
SGTC_2655	perillic acid	An apoptosis inducer.	0.0895265	0.053217	0.120378	-0.00634791	0.157921	0.00720701	0.10452
SGTC_1759	st043059		0.0894831	-0.0122647	0.0252408	-0.00116511	0.0527843	0.0763799	0.084287
SGTC_3027	9089541		0.0894377	0.0445444	-0.0196431	0.0140986	0.10886	0.0256456	0.179512
SGTC_2997	9067075		0.0894341	-0.0224575	0.0210283	0.0334193	0.0510917	0.0668203	0.364212
SGTC_1369	1866-0067		0.0892045	-0.0150253	-0.00519564	0.0986908	0.135012	0.0557913	0.00567696
SGTC_1952	st077036		0.0891136	0.068119	0.0445705	-0.00541079	0.0382744	-0.0221689	0.0908418
SGTC_2263	7948595		0.0890665	0.106331	-0.0103666	0.0799034	0.105029	0.0652152	0.0146234
SGTC_1266	0828-0227		0.0890455	0.0371222	-0.00324269	0.0767876	0.089957	-0.0128506	0.237209
SGTC_2208	7283366		0.0890239	0.0779515	0.141664	0.0227685	0.0444381	0.0929158	-0.0240586
SGTC_3040	9091894		0.0889485	0.0635299	0.0559504	0.0101633	0.00114882	0.140693	0.0171934
SGTC_632	0781-2353		0.0888433	-0.0126037	0.0195994	0.0294838	-0.0343658	0.00961202	0.258033
SGTC_2808	7946468		0.0887646	0.170939	0.0937839	-0.00363883	0.0442708	-0.0105064	0.0609343
SGTC_1122	capsaicin	An agonist at the TRPV1 receptor, a ligand-gated non-selective cation channel.	0.0887395	0.100618	0.0405961	-0.0447688	0.0556435	0.0632644	0.0359502
SGTC_2052	5265182		0.0887297	0.16866	0.131846	0.0846623	0.0680983	-0.0298489	0.0387632
SGTC_616	4092-0450		0.0887092	0.0207865	-0.0522283	0.00756647	0.0528968	0.0799814	0.0677135
SGTC_23	0213-0011		0.0886597	0.089633	0.078929	0.00796097	-0.0146469	0.0392717	0.0223981
SGTC_306	1672-3436		0.0885451	-0.00410601	0.0529932	0.184339	0.0926237	0.101637	0.122527
SGTC_1108	betulinic acid	Apoptosis-inducing agent of unknown mechanism.	0.0884604	-0.0401944	0.0950451	-0.0554795	0.148153	0.0091875	-0.041686
SGTC_817	1391-0715		0.0883438	0.113455	0.0388867	-0.0245683	0.0883968	0.0489926	0.0187999
SGTC_744	1594-0068		0.0882861	-0.0180172	0.0486854	0.0421686	0.0660258	0.0309795	0.142616
SGTC_3187	9109394		0.088238	0.0314882	0.0700689	0.000986417	0.115355	0.0486109	0.0464339
SGTC_2483	5729050		0.0880986	-0.0632357	0.0315745	0.0449364	0.0755443	0.0596938	0.128839
SGTC_1870	st057514		0.0880153	-0.0379794	-0.0386605	0.0320199	0.0712346	0.0683578	0.30356
SGTC_1016	4226-1401		0.0879405	-0.00313988	-0.00625741	0.00202536	0.109851	0.0991618	0.0716217
SGTC_146	3448-8650		0.0879336	0.00541605	0.0185899	0.04033	0.0313284	0.0698338	0.197978
SGTC_2128	5255449		0.0878308	0.00748053	0.0944946	-0.00874302	0.152817	0.152639	0.108002
SGTC_2626	ethyl orsellinate	A natural product.	0.0878048	0.0764067	-0.0711907	0.0136177	0.0557075	-0.0120865	0.11362
SGTC_3076	9116187		0.0877191	0.0836308	0.0515333	0.0587956	0.115873	0.0931824	0.0587686
SGTC_81	0411-0046		0.0876922	0.0134545	0.0603504	-0.0056791	0.0599809	0.0275612	0.0269418
SGTC_3156	9099931		0.0876653	0.0206482	-0.0391849	0.0683175	-0.00780945	0.0868554	0.126278
SGTC_331	k048-0133		0.0876208	-0.00925516	-0.00895425	-0.0131422	0.00909405	0.0773136	0.32102
SGTC_2151	5563267		0.0872494	0.00630902	0.0786247	0.0276378	0.08737	0.0639489	0.0794255
SGTC_462	ag-879	Ag-879 is a 5-Lipoxygenase inhibitor.	0.0871414	0.00752333	-0.0532669	0.00962197	0.047102	0.0161886	0.118372
SGTC_1389	3405-0187		0.0869348	0.028685	0.0322808	0.122834	0.115035	0.00572062	0.225717
SGTC_563	tetrahydrosecaminediol	A psychoactive constituent of the cannabis plant.	0.0869001	-0.000492555	0.0449327	-0.0560422	0.156227	0.0436249	0.140275
SGTC_163	1327-0036		0.0867666	0.0218435	-0.00185605	-0.0468889	0.0256743	-0.0191985	0.0825843
SGTC_2225	6654152		0.0867494	0.00166432	-0.0272749	-0.0205943	0.060106	0.0593239	0.356071
SGTC_2979	9012552		0.0866976	0.0662972	-0.0721175	-0.0387154	-0.00717992	0.037181	0.0490137
SGTC_147	4466-0538		0.0866115	-0.0142435	0.0957836	0.238282	0.0697801	0.0567877	0.0451502
SGTC_39	0986-0283		0.0866095	0.0345703	0.04705	-0.000473345	0.0104161	0.0386383	0.0494472
SGTC_1638	st008370		0.0865367	0.00253456	-0.0147808	-0.0230285	0.0372048	0.106212	0.17532
SGTC_3334	9142812		0.0865359	0.0102284	-0.00692591	0.028631	-0.0280438	0.0602445	-0.00957619
SGTC_2896	9052656		0.0864066	-0.013534	0.0121754	0.0617005	-0.0376785	0.034386	0.123957
SGTC_1621	st003705		0.0863807	0.0318102	-0.0385426	0.101486	0.0733146	0.0348505	-0.0289953
SGTC_43	0570-0105		0.0863182	-0.0349674	-0.00555267	0.14146	0.0381238	0.018034	0.112199
SGTC_2215	7188065		0.0860849	0.064134	-0.0596629	0.0370029	0.138298	-0.00471898	0.0580816
SGTC_1253	0550-0034		0.0860037	0.00141088	-0.0511928	0.058613	0.0487977	0.0636867	0.184614
SGTC_1779	st039427		0.0859496	0.0994241	0.01336	0.131987	-0.0146916	0.0500057	0.0804051
SGTC_2465	5809242		0.0859058	-0.00940075	0.0674089	0.0101574	0.0130049	-0.0426339	-0.0267503
SGTC_2304	7443016		0.0858897	0.0831733	0.0256965	0.021864	0.0253475	0.0121072	0.034401
SGTC_1839	st053978		0.0858686	0.0326748	0.104993	-0.0388805	0.266459	0.128571	0.120978
SGTC_2521	angolensin	A flavenoid.	0.0858134	0.0214993	0.0641638	0.015401	0.10627	0.069323	0.0635467
SGTC_2380	9035439		0.0857598	-0.00475215	-0.0445887	0.0241012	0.00850005	0.0963031	0.268554
SGTC_2095	5432005		0.0857007	0.0899316	0.0708732	-0.01088	0.0698166	0.148889	0.0230143
SGTC_2433	5607874		0.0856146	0.0428894	0.0227353	0.0194576	0.0619809	0.112306	0.0865467
SGTC_1448	4255-0083		0.08552	0.0170847	-0.0356934	0.0245372	0.0422528	0.115986	0.18657
SGTC_2720	fluspirilene	An atypical antipsychotic.	0.0855168	-0.0489098	-0.0598206	0.0696961	0.046005	0.0225058	0.110685
SGTC_1771	st048882		0.0854061	0.00472809	0.0864542	-0.014596	0.0549216	0.025158	0.128915
SGTC_1066	ketoconazole	Ketoconazole is an imidazole antifungal; acts by inhibiting lanosterol 14Î±-demethylase preventing the conversion ofÂ lanosterolÂ toÂ ergosterol, an essential component of the fungalÂ cytoplasmic membrane.	0.0853783	0.0436203	0.171187	0.121604	0.013949	-0.00182989	0.109934
SGTC_2640	pentamidine	Thought to act by inhibiting tRNA aminoacylation and translation.	0.0852829	0.00727807	-0.0637217	0.0166027	-0.0191138	0.12803	0.107526
SGTC_3179	9107801		0.0852587	-0.0330819	0.0856488	-0.00932978	0.0862929	0.0181363	0.0306904
SGTC_3079	9117512		0.0852327	0.0120635	0.056754	0.0072059	0.035597	0.0539788	0.034347
SGTC_2932	9016711		0.0850866	-0.0101399	0.0489718	0.0582516	0.0552564	0.127572	0.136148
SGTC_2196	6573537		0.0848645	-0.0499455	0.0771765	-0.0251625	0.0359829	-0.0348157	0.0786583
SGTC_868	0527-0199		0.084848	-0.0313808	-0.051308	0.191027	-0.0257028	-0.0530645	-0.0159509
SGTC_1390	3413-2614		0.0848177	0.105708	0.0581136	0.0115331	-0.0101763	0.0302786	0.0756685
SGTC_2480	5767542		0.0847217	-0.00240251	0.0439685	0.0529477	0.0282979	0.0284312	0.0955051
SGTC_56	0957-0365		0.0846511	-0.00648269	-0.0336624	0.012405	0.0859025	0.0638919	0.188456
SGTC_1684	st024538		0.0845878	0.0186174	0.0343029	0.0335638	0.082786	0.0111655	0.166122
SGTC_422	cantharidin	Cantharidin is a toxic blistering agent secreted by the Spanish fly of unknown mechanism. In Saccharomyces cerevisiae, cantharidin is thought to act by inhibiting GLC7 (encoding type 1 serine/threonine protein phosphatase) as decreased expression confers hypersensitivity and overexpression confers resisitance (Hoon et al., Nat Chem Biol 4, 2008).	0.084568	-0.0244472	-0.0212473	-0.0110569	0.165239	0.0729023	0.232597
SGTC_3352	9151559		0.0845305	-0.000673018	0.00464907	0.0883175	0.0331218	0.0266801	0.0788027
SGTC_1491	4138-0063		0.0843958	-0.0383577	0.0740145	0.123298	0.0066123	0.0546333	0.00151817
SGTC_676	falcarinol	Farnesol is a natural pesticide found in carrots. Preliminary research in animal models suggest that falcarinol may have a protective effect against certain types of cancer.	0.0841876	0.0723942	0.0921612	0.104086	-0.049872	-0.00242555	0.0573479
SGTC_2012	4023501		0.0840988	-0.0512312	-0.0394973	0.0873842	0.0640425	0.118316	0.035993
SGTC_270	tamoxifen	Used for treating and preventing breast cancer, tamoxifen competitively inhibits the binding of estradiol to estrogen receptors, thereby preventing the receptor from binding to the estrogen-response element on DNA. The result is a reduction in DNA synthesis and cellular response to estrogen.	0.0840807	-0.0169951	0.002765	0.0286443	-0.0205425	0.0611256	0.0115827
SGTC_2067	5224629		0.0840516	-0.0346296	-0.0248252	-0.0329783	0.00603171	0.00433369	0.166979
SGTC_1037	k284-1091		0.0839927	0.00714733	-0.00440511	0.0747896	0.013504	0.0480855	0.161752
SGTC_296	1222-0039		0.0839909	0.0869573	0.0504644	-0.022811	-0.0422477	-0.0212481	-0.0237947
SGTC_1377	2944-0135		0.0839696	-0.00811726	-0.0824564	0.0799248	0.00376042	-0.0323442	-0.01414
SGTC_3274	9138298		0.0839087	-0.0157601	0.00354968	0.00626765	0.127442	0.16831	0.0699363
SGTC_2782	7736369		0.0839024	-0.0265206	0.0483815	0.0160819	0.0374174	-0.00144261	0.0309943
SGTC_2157	5649910		0.0838992	0.0231683	0.0132145	-0.0413473	-0.0375844	0.0428453	0.305757
SGTC_1084	voriconazole	Voriconazole is an antifungal that acts by inhibiting lanosterolÂ 14Î±-demethylase, thereby preventing the conversion ofÂ lanosterolÂ toÂ ergosterol, an essential component of the fungalÂ cytoplasmic membrane.	0.0838885	-0.00336202	0.0238331	0.0104039	-0.0384402	0.0360974	0.179442
SGTC_2305	7443522		0.0838413	0.0122522	0.089915	-0.0642701	0.0527417	0.0533497	0.0446647
SGTC_1234	0326-0494		0.083841	-0.0488207	-0.0543432	0.0532342	0.0775865	0.0587903	0.071582
SGTC_2721	ifenprodil	IfenprodilÂ is a selective antagonist of theÂ NMDA glutamate receptor.	0.0838403	0.0755563	-0.0173118	0.0596166	0.0369659	-0.0224622	0.0289353
SGTC_951	1171-0579		0.083812	-0.0159837	-0.0402602	0.0290923	0.0343822	-0.0136115	0.331812
SGTC_2357	9067248		0.0837914	0.00396363	-0.0426562	0.0382017	0.0622151	0.119049	0.0438026
SGTC_1325	1431-0015		0.0837217	0.0111825	0.0521958	0.0359503	0.025273	0.0357982	0.0601537
SGTC_1567	st069303		0.0836905	0.0506815	-0.0807794	0.252719	0.0444823	0.0233051	0.107901
SGTC_2936	9038235		0.0835499	-0.0492005	0.0522685	-0.0358639	-0.0071743	0.11475	0.202459
SGTC_1342	1486-1464		0.0834557	-0.0101315	0.0707301	0.0432922	0.0336991	0.0732287	0.0969779
SGTC_3210	9128157		0.0834417	0.067824	0.0527192	-0.0137034	0.0626472	-0.0133351	0.0743936
SGTC_1032	k061-1018		0.0833504	0.102862	0.131624	-0.022945	-0.00717952	0.0572875	0.0178965
SGTC_3243	9134147		0.0833086	0.179837	0.0288199	-0.00692496	0.0871809	-0.0101577	0.0631925
SGTC_818	4072-2707		0.0833066	0.0245704	0.0778887	-0.022733	0.169771	0.0281073	0.0353548
SGTC_1584	6-fluoro-dl-tryptophan	An inhibitor of serotonin biosynthesis.	0.0832826	0.00215755	-0.00712885	0.0136076	-0.00525078	-0.00155306	0.215848
SGTC_2192	5915882		0.0831463	0.0248089	0.0317026	-0.00232554	0.105314	0.164299	0.232357
SGTC_2710	st078562		0.083131	-0.0212483	0.0126028	-0.0502119	0.0535886	0.0889568	0.0259953
SGTC_3288	9119690		0.0830585	-0.00376954	0.00651761	0.0458916	0.035482	0.0221059	0.168008
SGTC_2014	4013930		0.0829327	0.0460868	-0.0140844	0.0124714	-0.0347402	-0.0461053	0.046839
SGTC_1504	k297-0033		0.0826176	-0.0184092	0.0300096	0.0259133	0.0232044	0.070626	0.115323
SGTC_1088	bifonazole	Bifonazole, an imidazole, has a dual mechanism; topical antifungal that inhibits lanosterol 14Î±-demethylase as will as Hmg-CoA reductase.	0.0824693	0.0839419	-0.0110873	-0.0211344	-0.044284	0.0152724	-0.0112894
SGTC_2044	5102272		0.0824656	-0.0280084	-0.0384435	-0.0255934	0.0521938	0.0610376	0.299841
SGTC_1723	st034307		0.0824347	0.0834509	0.042848	-0.0133367	0.0790624	-0.0199238	0.264755
SGTC_1522	st012842		0.0823889	0.0180726	0.16585	-0.00812626	0.0342977	0.0709004	0.0873422
SGTC_3273	9137859		0.0823555	0.016587	0.0221421	-0.0416296	0.0435418	0.106914	0.159697
SGTC_682	0kpi-0099		0.0822755	0.0538612	0.0536168	-0.0433326	0.0271521	0.0749975	0.33585
SGTC_330	1488-0319		0.0820117	0.00466409	-0.0969154	-0.00992546	0.0327443	0.0463863	0.0552353
SGTC_3248	9135562		0.0818898	-0.00594855	-0.0419295	0.0968668	0.145658	0.100032	0.131134
SGTC_2946	9065502		0.0818743	0.0477012	0.0670327	0.0317214	0.17784	0.0744117	0.0408347
SGTC_2407	paclitaxel	Paclitaxel is a potent anti-neoplastic and anti-mitotic taxane drug, which binds to the N-terminus of Î²-tubulin and stabilizes microtubules arresting the cell cycle at the G2/M phase.	0.081791	0.0466652	-0.0603437	-0.0184214	0.0762135	0.0743939	0.143481
SGTC_2059	5238311		0.0816906	0.0171997	0.0340574	0.0105253	0.197111	0.0734405	0.0961325
SGTC_2687	chenodiol	A cholesterol synthesis inhibitor.	0.0814962	-0.024182	0.046344	0.129603	0.0396509	0.06156	-0.0117577
SGTC_1129	3453-1384		0.081387	0.00239946	0.0262214	0.0751695	0.0545698	0.0598506	0.0611891
SGTC_1528	st051518		0.0813262	0.0653052	0.0763011	0.0146241	0.0562229	0.0115304	-0.022706
SGTC_3069	9117009		0.0812218	0.0152652	0.00111638	0.0154237	0.192014	0.0527092	0.0254201
SGTC_1195	1502-0147		0.0812081	0.0288365	0.0364345	-0.00389655	0.0214289	0.0549213	0.129668
SGTC_2392	N-(3-chlorophenyl)-6-oxo-1H-pyridine-3-carboxamide		0.081064	-0.0378434	-0.0803085	-0.065732	0.0296145	0.104466	0.149317
SGTC_1559	coumarin 343	A hepatotoxic, DNA x-linker.	0.0810596	0.0845063	0.122543	-0.0103117	0.06417	0.148673	0.0853954
SGTC_1138	3761-0006		0.081024	0.00125387	-0.0359963	0.00371185	0.061915	0.0628852	0.0365372
SGTC_1023	4482-3888		0.0810192	0.0194927	0.104733	-0.0468171	0.0489301	0.115881	0.161536
SGTC_2623	humulene	An anti-inflammatory.	0.0809686	-0.0219081	0.00518004	-0.0203827	0.0474028	0.00697821	0.0778473
SGTC_2358	9037157		0.0809158	-0.0093187	0.0453095	0.124896	0.164384	0.0263893	0.179999
SGTC_3176	9106582		0.0806039	0.107053	0.0750011	0.00238293	0.112103	0.00535121	-0.00727145
SGTC_1059	3448-6867		0.0804575	-0.0280984	-0.0077184	0.105085	-0.0118523	0.0732191	0.0672419
SGTC_1831	st055328		0.0804305	0.0657212	0.089019	-0.00888554	0.0747483	0.0519422	0.184057
SGTC_1902	st060212		0.0803888	0.0982668	0.0280923	0.0665032	0.084233	0.0461861	0.126493
SGTC_3234	9132280		0.0803332	0.131744	-0.0162039	0.000838641	0.0560363	0.116044	0.0200813
SGTC_293	4049-0273		0.0803303	0.101055	0.00751647	-0.00387416	0.00514393	0.0677542	0.0699049
SGTC_299	1273-0059		0.0803237	-0.0356273	0.0126542	0.0992606	-0.0542152	0.135685	0.0357586
SGTC_1853	st056710		0.0799975	0.00327052	0.0580812	0.109019	0.0117244	0.0665479	0.0317302
SGTC_2613	3',4'-dimethoxydalbergione		0.0799071	-0.00763603	0.0540187	0.0280754	0.0598515	0.142196	0.0320091
SGTC_2560	caryophyllene	A peroxisome proliferator-activated receptor (PPAR) inhibitor.	0.0797782	0.0100525	-0.0290019	-0.0412644	0.0357091	0.0857159	0.0594996
SGTC_1611	st001856		0.079706	-0.0501878	0.118219	0.369611	0.0881416	-0.0224034	-0.00102454
SGTC_590	k048-0076		0.0796798	-0.00591208	-0.0376291	0.0161168	0.0210208	0.0618543	0.369707
SGTC_1879	gemcitabine	A nucleoside analog which inhibits DNA replication.	0.0795133	0.0940646	0.0567265	0.139783	0.0695089	0.020011	0.0670248
SGTC_2719	novobiocin	An antibiotic compound derived from Streptomyces niveus, novobiocin has a chemical structure similar to coumarin. Novobiocin binds to DNA gyrase, inhibiting DNA replication.	0.0793635	0.109997	-0.0211944	0.128667	0.00691683	0.00133626	0.0568831
SGTC_1473	k844-0725		0.0793177	-0.00093621	-0.0588926	0.0425356	0.000615295	0.0311448	0.0296416
SGTC_2415	st077333		0.0792477	0.00545178	-0.0660091	0.00944303	-0.0489974	0.0363406	0.0504163
SGTC_2611	pyromycin	An antibiotic that causes premature chain termination during translation. Part of the molecule resembles the 3' end of the aminoacylated tRNAs. It will enter the A site and transfer to the growing chain, causing premature chain release.	0.079223	0.0404744	0.00103475	0.00618893	0.0478561	0.194179	0.164412
SGTC_1669	st015249		0.0791925	0.0366917	-0.00536376	0.0863596	0.126318	0.0611556	0.188934
SGTC_1768	st044301		0.0791618	-0.00482799	-0.0398811	0.0327703	0.0974389	0.0982851	0.0724016
SGTC_656	4090-1979		0.079126	0.0626981	0.0598859	0.059693	0.0309139	-0.0307487	0.0225802
SGTC_2651	1327-0036		0.0789885	0.00665573	0.0309747	-0.0465429	-0.00386193	0.0470401	0.216847
SGTC_1247	0448-0043		0.0787738	0.115521	-0.047707	-0.0135081	0.0414568	0.0319905	-0.031953
SGTC_856	0433-0016		0.0787674	0.0130528	0.132845	0.0172096	0.219322	0.0579591	0.077031
SGTC_2903	5923464		0.0786029	0.0885218	-0.0205613	0.00311185	0.0467943	0.0443972	0.0888669
SGTC_3343	9148379		0.0784656	0.198688	0.0586069	0.0496135	0.010412	0.0257837	0.0927683
SGTC_1232	0279-0259		0.0783846	-0.0127731	0.0259834	-0.0274876	0.130332	0.121113	0.116642
SGTC_570	0987-0065		0.078342	0.0656808	0.103236	-0.0293575	0.0412867	0.137587	-0.0354602
SGTC_1400	3771-8998		0.0782856	-0.0233524	0.0789338	0.0337167	-0.0321123	-0.0715343	-0.0791364
SGTC_2850	9015429		0.0782808	-0.00193813	0.0569347	0.220366	0.0986504	-0.0311281	0.0860387
SGTC_1662	st014054		0.0781747	0.0039732	0.0215689	-0.00600424	0.000764391	0.0581369	0.0176313
SGTC_1020	4335-0961		0.0781485	-0.0389637	0.073718	0.139067	0.0434559	0.0222962	0.0202571
SGTC_413	propylparaben	A pharmaceutical preservative.	0.0781455	0.0983538	0.0707396	0.0111588	-0.0401265	-0.0097255	-0.0123678
SGTC_287	k060-0039		0.0781397	0.0188756	-0.0345435	-0.0241154	0.0630006	0.051505	0.034459
SGTC_1402	3909-7673		0.0780886	0.0442684	-0.00186618	0.0793256	0.0883793	-0.00110842	0.0327473
SGTC_1089	terbinafine	Terbinafine inhibits squalene epoxidase, an enzyme in the ergosterol biosynthetic pathway. Because ergosterol is part of the fungal cell membrane terbinafine is thought to change cell membrane permeability, ultimately resulting in fungal cell lysis.	0.078017	0.0187766	0.179981	0.0163548	0.0130637	0.00549148	0.00338814
SGTC_489	paxilline	A toxic potassium channel blocker.	0.0779894	-0.0482634	0.0879286	-0.0235822	-0.0160875	0.0849308	0.0568619
SGTC_2186	6124449		0.0779791	0.00410362	-0.00401206	0.000499169	0.0716785	-0.000465563	0.537523
SGTC_2748	diazoxide	A potassium channel activatior.	0.0779762	-0.0155305	-0.0440346	0.189811	0.0392269	0.00246886	0.0693159
SGTC_512	prima-1	A re-activator of the apoptotic function of mutant p53.	0.0778286	0.029392	0.0610809	0.174624	0.142229	0.0366218	0.0927929
SGTC_681	1642-0006		0.0777196	0.0247598	-0.0525481	0.196997	0.112983	0.000334081	0.0372214
SGTC_2308	7584454		0.0776054	0.0562313	-0.0148052	-0.00529019	0.0812294	-0.00200236	0.0292877
SGTC_2665	lovastatin	Lovastatin is a specific inhibitor of HMG-CoA reductase. HMG-CoA reductase catalyzes the conversion of HMG-CoA to mevalonate, an early step in cholesterol biosynthesis.	0.0775748	0.0198225	-0.0181454	-0.0341136	-0.0562663	0.00119733	0.100695
SGTC_2257	7960413		0.0775459	-0.0220658	-0.021095	0.0826964	-0.0128273	-0.0095282	0.155646
SGTC_910	3454-3003		0.0773823	0.0632527	0.0482784	0.0217093	0.0366537	0.0374112	0.0467377
SGTC_889	0919-1524		0.0773095	0.101821	0.00568498	0.0382838	0.0326278	-0.0406249	0.0467883
SGTC_1459	k035-0031		0.0771129	-0.0156895	-0.0803407	0.00533309	0.0324202	0.0628082	0.04539
SGTC_2310	7668677		0.0770826	-0.0270303	0.00171726	0.0442201	0.0594552	0.0158445	0.0606408
SGTC_1796	st049173		0.0769697	-0.00726434	-0.0223	0.15803	0.0387201	0.086619	0.0693759
SGTC_3276	9139060		0.0769536	-0.0223125	-0.0480885	0.296551	0.0861442	0.0728318	0.0812711
SGTC_294	k038-0071		0.0768481	-0.0104522	-0.0212809	-0.0221642	-0.0331953	0.0189715	0.256951
SGTC_1898	st060199		0.0767782	-0.00744713	0.0190906	0.141549	0.0801959	0.0464839	0.0527257
SGTC_2765	myclobutanil	Myclobutanil is a general use pesticide, and more specifically, a triazole fungicide registered for use on a wide range of food crops. Like other azoles, it acts by inhibiting fungal cytochrome P450Â enzymeÂ 14Î±-demethylase.	0.0766757	-0.012075	0.0568037	0.0184839	-0.0316105	0.00696336	0.14244
SGTC_32	0928-0142		0.0766471	0.00710375	-0.0163143	0.208404	0.0386089	0.0275817	0.0404297
SGTC_1995	st072814		0.0765609	-0.000920804	0.0172	0.0133399	0.046478	0.0289004	0.0502164
SGTC_1213	1315-0166		0.0765159	0.0568756	0.00173725	-0.0262966	0.000959919	0.0117677	0.254859
SGTC_1914	st062367		0.0762873	-0.0196914	-0.0686217	-0.0166044	0.0149833	0.0800211	-0.00625033
SGTC_1128	3448-9350		0.0762602	-0.00601821	-0.00327128	-0.0352491	0.0165489	0.0468896	0.0170215
SGTC_1406	3909-7906		0.0761068	0.0133421	-0.00888574	0.0884834	0.0341163	0.109966	0.0345453
SGTC_2840	9008771		0.076048	0.0400476	-0.0170359	-0.070865	-0.0139757	0.0637158	-0.044791
SGTC_2170	morpholine	Reacts with secondary amines.	0.0760082	0.0908512	0.161928	0.0717216	0.0221272	0.047755	0.101945
SGTC_1433	4060-0023		0.0760058	-0.0510602	-0.0276016	-0.00289123	0.0828162	-0.0532388	0.256461
SGTC_322	k048-0136		0.0760007	-0.014768	-0.00755304	0.0213173	0.0418551	0.0688353	0.375307
SGTC_3055	9094636		0.0759667	0.0720153	0.0879627	0.00654787	0.0217329	0.179235	0.128574
SGTC_2612	dictamnine	A quinoline derivative and established mutagen.	0.0758676	0.0141148	0.0522426	-0.0390407	0.14742	-0.0174295	0.282572
SGTC_3207	9114163		0.0758143	-0.0703749	0.0915951	-0.0353755	0.00546736	0.00476107	0.00762239
SGTC_1472	k841-0093		0.0757972	-0.0248041	-0.0232631	-0.0329294	0.0171481	0.0450423	0.0215235
SGTC_1153	4055-0057		0.0757171	0.0110112	0.0633734	0.102946	0.132496	0.0815807	0.0444754
SGTC_2750	bromebric acid	An antineoplastic and ion channel blocker.	0.075611	0.0192171	0.0692213	0.0387926	0.0675091	-0.13348	-0.0312966
SGTC_2278	7948257		0.0754955	0.0495519	-0.0205051	-0.0675297	0.0495444	0.0704934	0.0389575
SGTC_2849	9019321		0.0753546	0.0601527	-0.0700437	0.123495	0.0764127	0.0424627	0.117515
SGTC_1614	st002383		0.0752833	0.0340723	-0.0765639	0.0727515	-0.0622518	0.0364796	-0.0643071
SGTC_2423	st077119	An active alkaloid of Chinese medicines from Dictamni radicis cortex (Rutaceae).	0.075206	0.0854333	0.116594	-0.0607666	0.120399	0.222993	0.0316516
SGTC_1065	prochlorperazine maleate	A phenothiazine class of antipsychotic, more potent than chlorpromazine.	0.0751461	-0.0218613	-0.0537294	-0.0135576	0.0742104	0.182334	0.0686382
SGTC_1291	0993-0025		0.0748701	0.0217265	-0.0201911	0.0185266	0.0767215	0.0349529	0.093874
SGTC_1191	1487-1166		0.0747459	0.00668618	0.0393228	0.0333597	-0.0513932	0.0256452	0.218436
SGTC_1185	1319-0113		0.0747395	0.052704	-0.0692173	0.082719	0.132385	0.0712429	0.0137637
SGTC_1731	st035964		0.074465	-0.0399351	-0.0364127	0.00945842	0.0325253	-0.00520877	0.167732
SGTC_371	0195-0006		0.0743477	0.0510788	0.0309587	0.0368022	-0.000299197	0.00279202	0.0830126
SGTC_895	0964-0006		0.0743459	0.0195895	-0.0705751	-0.0189011	0.0120805	0.0370094	0.256236
SGTC_2053	5265679		0.0741864	0.01008	-0.0468461	0.15409	0.0959115	-0.0274459	0.0367379
SGTC_421	streptovitacin		0.0739628	-0.0236353	0.0182549	-0.02578	-0.0137444	0.0816044	0.081454
SGTC_562	3772-2733		0.073956	-0.0366204	-0.0399311	0.062185	0.0188603	0.0945848	0.162606
SGTC_3267	9137951		0.0739512	-0.0199656	0.00298252	-0.0282041	0.0513137	-0.0332107	0.0588796
SGTC_8	0354-0001		0.0739269	0.019544	-0.00137474	0.0726585	-0.0496475	0.0143246	0.0706945
SGTC_1587	estradiol valerate	A steroid.	0.0738017	0.0694076	0.010479	0.158864	-0.0335458	0.0364318	0.00846819
SGTC_1770	st043884		0.0737709	0.0645439	0.0487196	-0.0135988	0.0169089	-0.0503343	0.0184339
SGTC_2889	9059656		0.0737398	-0.0131241	0.0125303	-0.0426179	0.0900018	0.168313	0.0253799
SGTC_183	3914-0051		0.0736557	0.0527947	-0.0238431	0.0108386	-0.0142548	-0.00122966	0.0332692
SGTC_1682	st012968		0.0736432	0.00519355	0.00483341	0.0503396	0.0376125	0.0232835	0.00954295
SGTC_1015	4130-4525		0.0736289	0.00600396	0.00215297	0.0622993	0.156565	0.0684865	0.0321295
SGTC_3182	9108849		0.073529	0.0222524	0.0194061	0.0107293	0.0925464	0.00262106	0.0307529
SGTC_2648	atorvastatin	Atorvastatin is a specific inhibitor of HMG-CoA reductase. HMG-CoA reductase is the enzyme that catalyzes the conversion of HMG-CoA to mevalonate, an early step in cholesterol biosynthesis.	0.0733824	-0.0345156	0.0363026	0.0220517	0.000733348	-0.0187083	0.265892
SGTC_192	3455-0609		0.0733785	-0.0429004	-0.090711	-0.0238001	0.0101822	0.118481	0.0459925
SGTC_2158	5657123		0.0733439	0.0347123	0.0080827	0.126127	0.108886	0.0286171	0.174502
SGTC_1667	st014849		0.0732206	-0.00376483	-0.01642	-0.0231393	0.0821257	0.112793	0.128316
SGTC_2891	9063876		0.0732013	0.0847916	0.00776551	0.0157064	-0.00892701	0.0205905	-0.0603019
SGTC_3271	9137798		0.0730407	0.0176351	-0.0386711	0.0136646	-0.014186	0.0584985	0.0268143
SGTC_756	0508-1999		0.07285	0.0575749	-0.0484035	0.0328015	0.0330228	0.00918485	0.0673017
SGTC_1978	st071761		0.0728026	0.255425	0.0869721	-0.046174	-0.00170688	0.0603703	-0.00826801
SGTC_297	0986-0032		0.0726914	-0.00433087	0.0499316	0.0505169	0.0344979	0.0243647	-0.00456357
SGTC_1788	fluconazole	Fluconazole is a triazole antifungal; inhibits lanosterolÂ 14Î±-demethylase preventing the conversion ofÂ lanosterolÂ toÂ ergosterol, an essential component of the fungalÂ cytoplasmic membrane.	0.0726392	-0.00392725	0.0621478	0.0315843	-0.0320033	-0.0203608	0.188411
SGTC_345	1362-0200		0.0725402	0.0164136	0.0567959	0.0695414	0.00275598	0.0401337	0.124566
SGTC_487	nimodipine	L-type voltage-gated calcium channels inhibitor	0.0725312	0.0543376	0.0285937	0.117924	0.0613107	-0.0219647	0.000834209
SGTC_1260	0700-1617		0.072494	0.0474359	-0.0746979	0.0439438	-0.0305047	0.0409052	0.0539936
SGTC_2671	danthron	Danthron, derived from the anthraquinones, is an established mutagen and genotoxin.	0.0724915	-0.0373264	0.0879912	0.021703	0.132261	-0.0356019	0.226588
SGTC_3320	9137005		0.0724639	0.177226	0.0682746	-0.0831682	0.0441082	0.0175344	0.00358603
SGTC_2159	5658611		0.0723091	0.0888221	0.085364	0.00296143	0.257694	0.0157191	0.0158612
SGTC_2541	muurolladie-3-one	Muurolladie-3-oneÂ is a naturalÂ monoterpeneÂ ketoneÂ which is a component of someÂ essential oils.	0.0723061	0.0103254	-0.0995662	0.0859705	0.0434853	0.00359089	0.132176
SGTC_2606	farnesol	Farnesol is a polyprenyl alcohol found in plant essential oils. Induces apoptosis in cell cultures.	0.0722797	0.132988	0.015426	0.0214295	0.0387055	0.127107	0.0308946
SGTC_606	k015-0008		0.0722691	-0.0209309	0.0327898	-0.00218951	0.0462175	0.0955353	0.153781
SGTC_2676	harmalol	A monoamine oxidase inhibitor	0.0722593	0.00993738	-0.0294662	-0.0579495	-0.00954422	0.126411	0.220946
SGTC_1203	3992-3522		0.0722112	0.0757733	0.0388385	0.0119096	0.0759518	0.0060217	-0.0072766
SGTC_2138	5575593		0.0722085	0.0416207	0.059582	-0.0119972	-0.0349786	0.0280466	0.042733
SGTC_311	1315-0136		0.0721873	-0.00159796	-0.0510442	0.106312	0.053826	0.0284657	0.136123
SGTC_2129	girgensonine	Galangin is a flavonoid found in medicinal herbs. An inhibitor of cancer cell proliferation, galangin is used to study mechanisms of genotoxicity.	0.071967	0.025876	-0.0109742	-0.0182804	-0.00987128	0.110702	0.160361
SGTC_730	1436-0052		0.0719398	0.0509936	0.0098801	-0.0313892	-0.00107758	0.0564928	0.00504342
SGTC_3295	9122362		0.0718367	0.0674414	-0.0631649	0.098444	0.0534823	0.0313847	0.139402
SGTC_461	N-acetylfarnesylcysteine	Potential activator of peroxisome proliferator-activated receptor Î³ (PPARÎ³).	0.0718136	-0.00433136	0.0630051	-0.0368391	0.047498	0.0778433	0.0442996
SGTC_2183	6420625		0.0717952	0.0579063	0.0021389	0.0223712	0.0804769	0.0454155	0.171386
SGTC_2525	harmine	A monoamine oxidase inhibitor	0.0717864	-0.064193	-0.0788907	0.188836	0.0455653	0.0360946	0.0991421
SGTC_3058	9093861		0.071635	0.0304538	0.113343	0.0762025	0.0558917	0.0149172	0.0357477
SGTC_2057	5236571		0.0715376	-0.0160175	-0.081299	0.124819	0.0582584	0.0617481	0.0248258
SGTC_268	camptothecin	Camptothecin is a Topo I (topoisomerase I) inhibitor and antineoplastic.	0.071532	-0.0137871	0.0106976	0.00439258	0.0843837	0.0346322	0.239086
SGTC_2862	9027634		0.0715087	-0.00790131	0.0183131	0.0449928	0.0607311	-0.0155149	0.226812
SGTC_2601	securinine	A GABA receptor antagonist.	0.0714858	0.0109916	0.0271764	0.125575	0.11422	0.0170014	0.141425
SGTC_1090	efavirenz	A non-nucleoside reverse transcriptase inhibitor.	0.0714381	-0.00571421	-0.0214135	0.0434173	0.019399	-0.0158701	0.443638
SGTC_2844	9010103		0.0714148	-0.00034795	0.0177796	-0.0629906	0.00477582	0.0734355	0.0273088
SGTC_671	0560-0003		0.0712736	-0.00743672	0.0298339	0.0279942	0.0210194	0.15279	0.0685539
SGTC_3200	9114385		0.0712534	-0.0515876	0.0304786	-0.0253709	0.0669581	0.0159391	0.199141
SGTC_1035	k081-0041		0.0711861	0.00264517	-0.0234745	0.0568126	0.0386812	0.0244775	0.238237
SGTC_3183	9108214		0.0711172	-0.00635404	0.0211659	0.052987	0.012065	-0.0204398	0.0259615
SGTC_1096	rimcazole	A dopamine reuptake inhibitor.	0.071088	0.171019	0.0342735	0.0214268	0.13278	0.013384	-0.0249501
SGTC_2793	7325131		0.0710041	-0.00513447	0.0287047	0.00556123	0.0956665	0.0522896	0.0909801
SGTC_351	caspofungin	Caspofungin is an echinocandin antifungal that acts by inhibiting 1,3-beta-D-glucan synthase required for cell wall biosynthesis.	0.0708976	-0.00152658	-0.0522568	-0.000546949	0.00925595	0.0510534	0.289583
SGTC_726	3448-4391		0.0708556	0.0774496	0.0234782	0.0450399	0.070921	-0.00126785	-0.0123322
SGTC_1351	1496-0003		0.070812	0.0109388	0.0321335	0.00942702	0.0385625	0.00503983	0.00180458
SGTC_1923	st058458		0.070804	0.0172865	0.0571197	0.106704	0.0470644	0.011314	0.00618553
SGTC_1875	nocodazole	A microtubule depolymerizer.	0.0707923	-0.0194773	-0.0111611	-0.000675557	0.0206936	-0.000169983	0.496809
SGTC_2764	methyldopa	An alpha-2 adrenergic agonist that has both central and peripheral nervous system effects. Its primary clinical use is as an antihypertensive agent.	0.070752	0.0517682	0.0256547	0.029203	-0.00360186	0.0723945	0.01333
SGTC_3319	9138450		0.0707256	0.0962531	0.0121136	-0.0228143	7.30319e-05	-0.0273561	0.0680363
SGTC_1976	st070609		0.0706845	0.00942515	-0.00201016	0.0554897	0.0527768	0.0114951	0.0982716
SGTC_162	k030-0015		0.0706717	0.129902	0.0311059	0.0511895	0.00767148	-0.0368621	0.00697604
SGTC_1194	1488-0194		0.0706259	0.0469737	0.00347745	0.025565	-0.0800641	-0.0228567	0.00640088
SGTC_2216	7189485		0.0706117	0.0115796	0.0779657	-0.0683152	0.00692621	0.0918991	0.0355446
SGTC_340	k038-0059		0.0705335	-0.020807	0.000153498	-0.0156895	-0.0278651	0.00139544	0.203293
SGTC_2998	9066762		0.0705232	-0.00982169	0.0347866	0.252802	0.110336	0.0160178	0.06129
SGTC_2295	7971645		0.0704441	0.175668	0.158105	0.0275962	0.0558388	-0.0228066	0.0175664
SGTC_105	0111-0055		0.0703989	-0.0510967	-0.00446691	0.0703232	0.0108007	0.0372341	0.0139083
SGTC_785	1270-0111		0.0703101	0.0334509	0.0700855	0.068548	0.018927	0.0968956	0.0773594
SGTC_698	k064-0052		0.0702979	-0.0353058	-0.0593172	-0.0589248	0.0546883	0.0651743	0.24412
SGTC_3159	9100096		0.0701719	0.0514451	-0.0263055	-0.0670774	0.0680668	0.0420308	0.0842165
SGTC_2191	5911152		0.0701675	0.0225987	-0.00491823	0.09253	0.0924483	0.180542	0.215621
SGTC_1858	4-chloro-8-(diethylamino)pyrano[3,2-c]chromene-2,5-dione		0.0701463	-0.027981	0.0427557	-0.0285	0.0271023	0.0949257	0.181485
SGTC_1765	st044815		0.0701463	0.0140571	0.106142	0.0967948	0.0733361	0.0268442	0.131465
SGTC_1590	st077108		0.0700613	-0.0228271	-0.00735218	-0.0475433	0.0462513	0.0697435	0.255215
SGTC_584	0986-0246		0.0696189	-0.00257725	0.0471443	0.0435534	0.178284	0.0526387	0.142439
SGTC_227	fluconazole	Fluconazole is a triazole antifungal; inhibits lanosterolÂ 14Î±-demethylase preventing the conversion ofÂ lanosterolÂ toÂ ergosterol, an essential component of the fungalÂ cytoplasmic membrane.	0.0695792	-0.0100524	0.0384331	0.00808165	0.00431926	0.0250731	0.399244
SGTC_1854	st056233		0.069532	0.00033527	-0.00820043	0.0196294	0.0245885	0.0588417	0.114206
SGTC_3227	9130768		0.0694609	-0.0121375	-0.0050946	0.0833095	-0.00721586	0.0636465	0.159966
SGTC_1408	3909-7976		0.0693353	-0.0155804	0.0726682	0.056148	0.104939	0.0284514	0.0431634
SGTC_1763	st044482		0.0692346	0.00159157	0.0117522	0.00515888	0.0626645	-0.00552371	0.00277696
SGTC_1071	trifluoperazine	Phenothiazine antipsychotic; D2Â dopamine receptor antagonist; inhibits calmodulin-dependent stimulation of 3â€²:5â€²-cyclic nucleotide phosphodiesterase; inhibits cAMP-gated cation channels.	0.0692294	0.0253816	0.0729338	0.086287	0.13731	0.0737067	0.0328066
SGTC_1169	aniline yellow	A DNA damaging agent.	0.0691143	-0.0253452	-0.0175911	0.114445	-0.00207222	0.0274519	0.0135145
SGTC_1907	st060210		0.0691142	0.141668	0.131354	-0.0283123	-0.0393747	0.00316537	-0.0142319
SGTC_604	1000-0114		0.0691032	-0.0387959	-0.0681806	-0.054007	0.0219178	0.185363	0.150731
SGTC_2940	9060638		0.0690037	0.0420388	-0.0579455	0.0899084	0.0354741	0.124443	0.0917929
SGTC_3113	9123498		0.0689941	-0.0391308	0.156844	0.177818	0.145896	0.0567795	0.225719
SGTC_2306	7482397		0.0689037	0.00803262	0.0399292	0.0323793	0.111559	0.0426948	0.0757469
SGTC_1175	0741-0056		0.0687956	0.101102	-0.0930908	0.0210175	0.120399	0.0647768	0.114551
SGTC_260	nsc-65238		0.0686356	0.000811896	0.030752	0.0111341	0.0678941	-0.0257858	-0.0147598
SGTC_1397	3532-0190		0.0685884	0.0176934	-0.00700259	0.0201852	0.0139579	-0.026693	0.130897
SGTC_343	4130-2827		0.0685597	0.148337	0.0405169	-0.0439984	0.0128192	0.0267516	-0.0437139
SGTC_2591	skatole	A reactive methylindole and nucleophilic thiol agent. Glutathione protects alkylation of proteins by a skatole metabolite.	0.068559	0.0162662	0.0281284	-0.0296928	0.0281553	0.0895379	0.0622078
SGTC_326	k292-0812		0.0685292	0.0190275	0.0254594	-0.00715929	0.0216718	0.0501638	0.143606
SGTC_2969	9091408		0.0683701	0.0312882	-0.0317889	0.0763497	0.0528373	0.0281933	0.00804397
SGTC_3221	9128209		0.0683506	-0.0265505	0.00241294	0.122456	0.0721009	0.048438	0.280473
SGTC_248	streptozotocin	DNA alkylating agent.	0.0683341	-0.00886796	0.0525367	0.0182703	0.174539	0.0443004	0.293355
SGTC_2320	7373003		0.0681686	-0.0196265	-0.0528905	0.0192196	0.00124861	0.129703	-0.00878499
SGTC_2352	9027995		0.0681346	0.0155703	0.0419331	-0.00150396	0.0384073	0.0348034	0.353038
SGTC_2244	6635614		0.068006	0.0927174	0.0911119	0.0949262	0.104628	0.0112942	0.000162685
SGTC_2617	dihydrotanshinone i	Tanshinone extracted from a herb,Â Salvia miltiorrhiza, commonly used in Chinese traditional medicine. A significant decrease in tumor growth was observed using dihydrotanshinone I and irradiation treatment with a mouse xenograft model.	0.0679954	0.046941	0.0268031	-0.0352404	0.176082	0.0574842	0.190214
SGTC_1539	benzyladenosine	A nucleotide analog.	0.0679286	-0.0459976	0.0854917	0.00119929	0.088505	0.0190731	0.0584092
SGTC_2410	aloe-emodin-8-o-glycoside	Anti-tumor activity is associated with an increased production of reactive oxygen species (ROS) that, in turn, reduces the mitochondrial transmembrane electrical potential, culminating in apoptosis.	0.067923	-0.00511485	-0.0213752	-0.0518072	0.00522211	0.0565543	0.234586
SGTC_3129	9127257		0.0678148	0.0088006	-0.0411444	0.036863	0.0576695	-0.0277416	0.0326578
SGTC_3044	9093193		0.0677768	-0.0331536	-0.0418427	0.0743087	0.0595267	0.0395581	0.024791
SGTC_1139	k015-0024		0.0677767	-0.00911514	0.0112013	0.0394251	0.0413537	0.0823495	0.0613499
SGTC_2330	7979373		0.0677069	0.0215449	-0.0158	-0.0453028	0.0236053	0.101319	0.151448
SGTC_2805	7950783		0.067671	0.0693449	-0.0403726	-0.00789089	-0.0118668	0.0393478	-0.0129097
SGTC_535	2293-4129		0.0676252	0.0239584	0.14491	0.0742429	0.0714893	0.033922	0.146889
SGTC_2899	9053889		0.0675821	0.0876012	0.0365904	-0.0178783	0.0292707	0.0484635	0.0972666
SGTC_3205	9113483		0.067545	0.0516502	-0.000452066	-0.0247808	0.0139731	0.133331	0.0253338
SGTC_1304	1165-0502		0.0675292	0.0367339	-0.0144721	0.00193297	0.0142624	0.0297362	0.0578626
SGTC_1317	1273-0028		0.0673607	-0.0065844	0.0198448	0.0126834	0.00270953	0.025153	0.314503
SGTC_3009	9080819		0.0673197	0.0274892	0.0301135	0.0180636	0.0866115	0.0768247	0.116369
SGTC_134	0269-0018		0.0672772	0.0931115	-0.0155098	0.0129268	0.0510806	-0.0197717	-0.0703038
SGTC_624	k048-0052		0.0672161	-0.0284266	-0.0447149	0.00643483	0.063993	0.0663481	0.195957
SGTC_2709	st078560		0.067175	0.000456731	-0.023384	0.0230482	0.0421196	-0.0230912	0.0352911
SGTC_1201	1889-3372		0.0670978	0.0174712	0.12004	0.108302	0.0884142	-0.0216839	0.0778842
SGTC_573	3702-0553		0.0670174	0.0271558	0.0862609	-0.0608587	0.0292253	0.0170068	-0.016563
SGTC_2197	6588183		0.0670149	0.0540857	0.000575138	0.0406333	-0.00226231	0.00709781	0.0800487
SGTC_2456	5770359		0.0669679	-0.0241034	-0.005351	-0.0606467	0.0650469	0.193979	0.124089
SGTC_2999	9069765		0.0668335	0.0937273	0.0497417	0.052624	0.0381299	0.0817844	0.101217
SGTC_492	tmb-8	TMB-8 is a protein kinase C (PKC) inhibitor which also serves as an intracellular Ca2+ and Na+ channel-blocker resulting in reduced membrane K+ conductance.	0.0668196	0.00163667	-0.0317425	0.0479797	0.0896155	0.108662	-0.0227633
SGTC_1641	st009299		0.0667963	-0.0221129	0.0235948	-0.020588	0.0803771	0.10154	0.113761
SGTC_1312	1218-2183		0.0667528	-0.0507945	-0.0272145	0.0195295	0.0345909	0.111058	0.146265
SGTC_3264	9137442		0.0667404	0.176838	0.0409407	0.0261128	0.0840371	0.0152854	-0.0105058
SGTC_2574	2',4'-dihydroxychalcone	A potent inhibitor of glutathione S-transferases.	0.0667092	-0.0516514	0.0597246	0.0748577	0.0661206	0.0900896	0.161258
SGTC_3229	9132204		0.066602	0.0525505	0.0100865	-0.00166421	0.0481536	0.0594559	0.150093
SGTC_3304	9125678		0.0665029	-0.00588235	-0.0378534	0.0240416	0.0172098	0.0326067	0.243919
SGTC_3130	9127414		0.0663927	0.145476	-0.070228	-0.0111466	0.0246728	0.0221651	0.119956
SGTC_1198	1612-1005		0.0663645	-0.0115196	0.154144	0.0430874	0.105522	0.0945568	0.00645719
SGTC_1526	arabinosylhypoxanthine	An inhibitor of viral and cellular DNA polymerases.	0.0663523	0.0373455	0.0148071	-0.0177274	0.017549	0.0475541	0.0189848
SGTC_64	000l-0018		0.0663325	-0.00517173	0.0374711	-0.0249242	-0.0191156	0.00536798	0.283059
SGTC_2001	4023502		0.0663082	0.0296676	-0.0385987	0.00922297	-0.0176932	-0.000983929	0.15383
SGTC_327	1273-0057		0.0662574	0.00540853	0.0203177	0.0063576	-0.0107584	0.0331046	0.23563
SGTC_1399	3562-5772		0.0662364	-0.00886277	-0.0751815	0.0449098	0.0240133	0.041111	0.126887
SGTC_731	3966-0296		0.0662289	-0.0156667	-0.0118577	0.0509981	0.0724528	0.122898	0.0914542
SGTC_627	1391-0720		0.0662215	0.0155498	-0.0300755	0.167125	0.132808	-0.0110481	0.138193
SGTC_149	3970-0822		0.0661902	0.0301004	0.0485838	0.0241199	0.0621374	-0.00185576	0.229767
SGTC_754	3474-0146		0.0660468	-0.0140894	0.0262894	0.121461	0.0413438	-0.0336375	0.0192015
SGTC_2223	6903751		0.0660271	-0.00394645	-0.030158	0.0352545	0.0579596	-0.000215733	0.065553
SGTC_2829	7992743		0.0656906	0.032853	0.058472	0.0608255	0.0675995	0.0220973	0.0477944
SGTC_2985	9022375		0.0656796	-0.0338328	-0.019155	0.00798034	0.0400341	0.085049	0.0221902
SGTC_1313	1220-0047		0.0656561	0.0557756	-0.0216853	-0.0122384	0.0198317	0.0437943	0.0338199
SGTC_1503	4585-0012		0.0655604	-0.00876081	-0.00718469	-0.00172562	0.0925781	0.138006	0.0939567
SGTC_1773	st048542		0.0655447	-0.0185277	-0.0358764	0.022812	0.0340411	0.0918095	0.351203
SGTC_1303	1160-0052		0.0654884	0.222843	0.132642	-0.0811509	-0.0105908	0.0284634	0.0386365
SGTC_2029	5175081		0.0654823	0.00106488	0.00856553	-0.0219991	0.0642803	0.0650104	0.0798117
SGTC_1727	st034309		0.0654493	-0.0139066	-0.0149936	-0.024383	0.000339276	0.107897	0.219231
SGTC_3307	9126885		0.0653156	0.0978689	0.122306	0.0748281	-0.0175868	0.105196	0.0740459
SGTC_992	3909-8734		0.0651902	0.0921276	0.0201726	-0.0476074	0.0337338	0.0300619	0.0199444
SGTC_852	0418-0143		0.0649786	0.0182319	0.0281606	0.0610903	-0.0247193	0.0630493	-0.00440035
SGTC_250	brefeldin a	Brefeldin A inhibits transport of proteins from ER to Golgi and induces retrogradeÂ protein transportÂ from theÂ Golgi apparatusÂ to theÂ endoplasmic reticulum.	0.0649534	-0.00774148	0.085145	0.0830391	0.0589198	0.0655916	0.0375289
SGTC_1938	st074717		0.0648502	0.0819847	0.0582687	0.121001	0.0551897	-0.012114	0.0391468
SGTC_3238	9133470		0.0648203	0.109625	0.0571097	-0.0259445	0.140455	0.0365601	0.0608413
SGTC_2089	5281248		0.0647989	0.0320852	0.030171	0.0321686	0.0320658	0.0614693	0.011631
SGTC_1780	st038448		0.0647808	0.0182361	0.0331682	0.131158	0.0137912	0.0369746	0.0468976
SGTC_3033	9090887		0.0642613	0.0376268	0.0881032	-0.00889204	0.0590315	-0.0396827	0.0349209
SGTC_2036	5160441		0.0642327	0.0239739	0.0154951	0.00111721	-0.0184986	0.0289534	0.0491008
SGTC_1519	esterone	A steroid.	0.0642057	0.159904	0.0540656	0.0414814	-0.00767983	0.108629	0.185472
SGTC_1498	4478-3555		0.0641969	0.0574337	0.0464228	-0.0115717	-0.0032832	-0.0218122	-0.0284104
SGTC_1414	3917-0015		0.0641616	0.0303212	-0.00360563	0.0296926	0.0502655	0.127878	0.0752745
SGTC_2279	7948423		0.0641042	-0.0266926	0.0293387	-0.0297282	0.0676546	-0.0189299	0.0638314
SGTC_882	0843-0131		0.0640532	0.0992054	0.164001	-0.021945	0.0943881	0.0221841	-0.0192615
SGTC_2048	5246248		0.0639828	0.00994402	0.0995587	0.0972336	0.0504529	0.0175269	0.0204134
SGTC_1435	4092-0789		0.0639156	0.158724	-0.0232419	-0.0520278	0.0121568	0.00614757	0.0456379
SGTC_1927	st060202		0.0638759	0.0389489	0.103467	0.0460941	0.039932	0.0725108	0.0703178
SGTC_1617	st002906		0.0638632	0.0604049	-0.00266765	-0.0252098	-0.00534003	0.0529251	-0.00797627
SGTC_2327	6189656		0.0638424	-0.00245457	-0.0327062	-0.00389536	0.00455582	0.0909896	0.0774484
SGTC_3038	9091290		0.0637235	0.0975883	0.0312691	0.0249726	0.0242104	0.0422448	0.0279384
SGTC_3296	9122258		0.0636304	-0.034638	0.0806751	0.00422153	0.0525164	0.0151189	0.271166
SGTC_3217	9129673		0.0634332	-0.0285198	0.0317588	0.0534627	0.103112	0.0282826	0.155483
SGTC_1487	3970-0795		0.0633473	0.129952	0.0448933	-0.0795761	0.0740186	0.120513	0.0646238
SGTC_374	0880-0231		0.0633397	-0.000723737	0.0148631	0.0574538	0.0222172	-0.00243362	0.0253178
SGTC_2921	7974240		0.063268	0.0998277	0.131622	-0.0632938	-0.0403761	0.0703566	0.0500287
SGTC_2544	sphondin	Sphondin is a coumarin of the psoralen class.	0.0631103	0.00839925	-0.0115644	-0.00648519	0.0742961	0.0465237	0.354978
SGTC_2064	5220758		0.0631057	0.131858	0.10994	-0.045042	0.0769746	0.10384	0.0238798
SGTC_2148	5546263		0.0630699	0.0977442	0.01123	0.0253946	-0.00337097	-0.0295957	0.0724568
SGTC_2537	larixol		0.0630553	0.0203851	0.0367893	-0.00154199	0.0828918	-0.0565353	0.00132264
SGTC_2430	5571206		0.0630338	0.0674747	0.00935675	-0.0376493	0.0527732	0.00290383	0.0547723
SGTC_653	0203-0016		0.0630281	0.0320654	0.00170194	-0.0608086	0.0445607	0.0643841	0.0904985
SGTC_1847	st056231		0.0629254	0.0950907	0.0246139	-0.0114277	0.0314873	0.0226209	-0.00330111
SGTC_3198	9112019		0.0628798	0.0427813	-0.0273969	-0.0349752	0.0348039	0.0486276	0.146007
SGTC_995	3931-2021		0.0628517	0.0261649	-0.0260782	-0.0602324	0.0213888	0.0138636	0.0280083
SGTC_452	diindolylmethane	Inhibits expression of several cancer promoting factors.	0.0628515	-0.0306571	0.0189113	-0.0291741	0.0454768	0.157718	0.0210131
SGTC_1310	1188-0297		0.0627421	0.00387888	0.0275891	-0.0281263	0.0186586	-0.0167979	0.138576
SGTC_2920	7982904		0.0626119	0.0636736	-0.033478	0.0221718	0.0675931	0.0903377	0.0680974
SGTC_12	0849-0099		0.0625903	-0.0321356	0.0768227	0.0388507	0.0147287	0.00400436	0.128847
SGTC_1067	clotrimazole	Clotrimazole, an imidazole antifungal; inhibits lanosterolÂ 14Î±-demethylase, thereby preventing the conversion ofÂ lanosterolÂ toÂ ergosterol, an essential component of the fungalÂ cytoplasmic membrane.	0.0625625	0.0646357	0.055414	-0.00335978	-0.0400632	0.035389	0.167476
SGTC_467	ro 31-8220	Ro-318220Â is aÂ protein kinase CÂ (PKC)Â inhibitorÂ of theÂ bisindolylmaleimideÂ class.	0.0625597	-0.0181736	-0.00422494	0.0672751	0.0509896	0.0875573	0.0939638
SGTC_846	0335-0850		0.0625464	-0.02914	-0.0406829	0.0117965	-0.0528548	-0.0283165	0.172914
SGTC_117	lucigenin	An acridine derivative; a dye stuff and potential carcinogen.	0.0624895	-0.0239654	0.0668831	0.056463	-0.0232543	0.0026758	0.0525397
SGTC_473	2-arachidonoylglycerol	An endocannabinoid.	0.062437	0.0959567	0.0482112	-0.0377385	-0.00146463	-0.0404838	-0.0251303
SGTC_3140	9094243		0.0622508	0.00522842	-0.0327128	0.00567399	0.101692	0.0825815	0.0655657
SGTC_1387	3342-1166		0.0621381	-0.0687928	-0.016211	-0.0271989	0.0265732	0.0140842	0.086394
SGTC_1273	0849-0096		0.0620557	-0.00358641	-0.00475264	0.0649042	-0.0202227	0.0183929	0.0761622
SGTC_1574	spiramycin	An antibiotic and protein synthesis inhibitor.	0.0620201	0.0328395	-0.0305909	0.267281	0.0493679	0.0148966	0.0327035
SGTC_3336	9143619		0.0619952	-0.0553972	-0.03727	0.0851267	0.0103034	0.0772899	0.0280761
SGTC_1840	st055363		0.0619811	0.0982897	0.0179954	-0.0391658	-0.0438459	-0.00974441	-0.0296882
SGTC_2590	3,4',5',6',7'-pentamethoxyflavone		0.0619703	0.182699	0.327881	0.0563177	0.0401344	0.0765004	-0.0105676
SGTC_2830	7992007		0.0619631	-0.00105753	-0.0373234	0.0455035	-0.00276091	0.0322034	0.133079
SGTC_3133	9127736		0.0619362	-0.039462	0.0788809	0.048371	0.0787922	0.0739321	0.131568
SGTC_2451	5856223		0.0619264	0.0608833	0.0399693	0.111703	0.142315	0.0451081	0.0688211
SGTC_1520	flindersine	Flindersine is a natural alkaloid of the quinoline subtype.	0.0618448	0.0552327	-0.00555117	0.00332703	-0.0269348	0.0272122	0.00344549
SGTC_235	0330-0087		0.061827	-0.0239603	0.00867584	-0.0452048	0.0671826	0.0450184	0.289831
SGTC_2364	9055074		0.0617361	-0.000388954	0.0638298	0.0848313	-0.00645187	0.043762	0.0207328
SGTC_2886	9058944		0.0613692	0.060862	0.0143482	-0.0249328	0.0198835	0.0321076	0.0444292
SGTC_900	1112-0045		0.0613182	-0.0176993	0.033943	0.0883959	0.0822331	0.00867826	0.102223
SGTC_2319	6033012		0.0611998	-0.0269547	-0.0252385	0.00509696	0.042077	0.00191273	0.462284
SGTC_2913	7966556		0.061189	0.0575102	-0.00911765	-0.0760155	0.0765866	0.071044	0.0888164
SGTC_1580	hydrocortisone 21-hemisuccinate	A steroid.	0.0611481	0.00669142	-0.0367592	0.155777	0.0588004	-0.0179374	0.076747
SGTC_3144	9087057		0.0610838	0.0569735	-0.00699027	-0.0414127	0.0722186	0.116892	0.0482204
SGTC_888	0916-0002		0.0610083	-0.0138891	0.0828606	0.0383007	0.0517945	-0.0153703	0.137024
SGTC_1041	0206-0046		0.0609637	0.0875031	-0.0358357	0.0296773	-0.0365357	-0.00590019	-0.0913275
SGTC_2171	5739187		0.0609513	0.0664352	-0.0196095	0.097976	0.0578318	0.0331896	0.0604475
SGTC_772	k072-0172		0.0609378	-0.0252021	0.0247386	-0.0615753	0.00916832	0.174711	0.0933087
SGTC_103	0844-0104		0.0609103	-0.00162429	0.030648	-0.00770513	0.032635	0.0333174	0.159285
SGTC_3021	9087658		0.0608971	0.00508985	0.0675552	0.063168	0.117085	0.021592	0.0101003
SGTC_1109	tnp00067		0.0608799	0.139739	0.0442781	-0.000537769	0.0188367	0.10871	0.069546
SGTC_1534	6-azauridine	6-Azauridine (AzUrd) blocks the conversion of orotic acid into UMP; used in antiviral studies.	0.0608645	-0.023279	0.053432	-0.0400915	0.0705592	0.0755942	0.162733
SGTC_2565	isoliquiritigenin	Binds to benzodiazepine receptor 65X better than valium.	0.0608474	0.052126	-0.015118	0.0259691	0.121207	0.0337472	0.0398916
SGTC_155	k072-0202		0.0607781	0.0839159	0.170298	-0.00452791	0.0225237	0.068887	0.0805674
SGTC_1315	1237-0019		0.0606921	0.0287928	-0.0639767	0.133188	0.0892374	0.08168	0.101097
SGTC_2458	5808907		0.0606801	-0.0220416	0.108208	0.00943279	-0.00544511	0.0383185	0.0751676
SGTC_2181	6316240		0.0606668	0.135102	-0.0072506	0.0495557	0.0057519	0.016854	-0.0202953
SGTC_3206	9114350		0.0605109	0.0251241	0.0436146	-0.0590988	0.000545724	-0.0204559	-0.00345941
SGTC_717	1532-0246		0.0602383	0.0802151	-0.00585064	0.131847	0.105702	0.0302083	0.0596227
SGTC_47	0149-0135		0.0601878	-0.044558	0.0563877	-0.0680822	0.051434	0.0776175	0.0113827
SGTC_2116	5511452		0.0600369	0.0160396	-0.0210851	-0.0473383	0.116306	0.0427428	0.111547
SGTC_2945	9067681		0.0599775	-0.013493	0.0285123	-0.00473966	0.0493063	0.0278105	0.0625886
SGTC_1512	0259-0544		0.0599478	0.0282395	0.0714137	0.0716163	0.0302138	0.0409827	-0.0170905
SGTC_1744	st037937		0.0599392	0.0867179	0.0799301	-0.0291891	0.0590176	0.0241562	0.00793859
SGTC_234	nsc-17383		0.059803	0.0285721	0.0458031	0.047742	-0.0343868	0.0847343	-0.0261401
SGTC_1696	st025591		0.0597121	0.0632522	0.0341132	-0.00384915	0.00740489	0.0178341	-0.0101379
SGTC_1965	Pectolinarigenin	An anti-inflammatory.	0.0596092	-0.0551792	0.0343321	-0.00773662	0.0711439	0.0544075	0.15631
SGTC_319	1348-1596		0.05953	-0.00361675	-0.0379139	-0.008922	0.0164974	0.0160341	0.37283
SGTC_2236	dapsone	A bacterial DFR inhibitor. An anti-cancer agent.	0.0595027	-0.0225384	-0.0117589	-0.069895	0.0426438	0.0543206	0.105868
SGTC_2040	5100729		0.0594979	-0.0131368	-0.00904695	-0.00924576	0.0197835	0.0221856	0.141856
SGTC_1957	st077035		0.0594028	0.125735	0.075089	0.0128653	0.0274382	-0.00676154	0.064555
SGTC_3226	9131256		0.0591839	0.00139466	0.0122783	-0.0330493	0.0762185	0.0972313	0.113229
SGTC_2169	5-(ethoxymethyl)quinolin-8-ol		0.0591621	0.0285289	0.0358406	0.0255128	0.002976	-0.0156654	-0.0145827
SGTC_906	1165-0455		0.0591297	-0.0194825	0.069378	-0.058012	0.0571705	0.0362353	0.0709638
SGTC_1833	st055984		0.0591157	0.0698974	0.00697469	-0.0223279	0.0175021	0.124892	0.0623036
SGTC_2394	5221648		0.0591117	-0.0270778	0.0317171	-0.0278945	0.0450583	0.0605412	0.07443
SGTC_468	gf-109203x	A protein kinase C inhibitor.	0.0590648	0.0152749	-0.0432579	0.0902175	0.0204136	0.0247228	0.0499207
SGTC_160	3453-0671		0.0589894	0.0402353	-0.0295526	-0.0178475	0.0213988	0.0040767	0.0532222
SGTC_1592	4',5'-dihydroxyflavone		0.0589026	0.0157004	0.112675	0.041359	-0.00382805	-0.0133751	-0.0147868
SGTC_1862	st057513		0.0588988	0.126657	0.00647857	0.0180467	0.160252	0.138275	0.0222219
SGTC_861	0443-0273		0.0588365	0.0669097	-0.00269434	0.0719118	0.121408	0.0824432	0.0458634
SGTC_2083	5306046		0.058746	0.00979239	-0.0486791	-0.0215277	0.0211262	0.0961021	0.271847
SGTC_1540	guanosine	GuanosineÂ is aÂ purineÂ nucleoside.	0.0585907	0.0164236	0.061193	0.117674	-0.0171308	-0.0279493	-0.0203844
SGTC_1802	st050112		0.0585808	-0.0264765	-0.0550327	0.0732012	-0.0233633	-0.0138455	-0.0014282
SGTC_2981	9013952		0.0583731	-0.0413506	0.0189834	0.0307673	0.0544206	-0.0240693	0.0724345
SGTC_420	mitomycin C	Mitomycin is a bifunctional and trifunctional alkylating agent, cross-links DNA inhibiting DNA synthesis and function. Mitomycin is cell cycle phase-nonspecific.	0.0583019	0.0704949	0.0597415	-0.0684469	0.0319716	0.0348519	0.11072
SGTC_614	0462-0418		0.0581537	0.0897401	-0.0232299	0.00611872	-0.00836281	-0.00249509	-0.0339757
SGTC_386	1509-0011		0.0581207	0.0632518	0.00108143	0.0112034	0.0475987	-0.0105377	-0.0641681
SGTC_184	1494-0393		0.0579505	0.0562553	0.142912	0.0257229	0.0360227	-0.00175023	0.0850828
SGTC_1167	k781-0610		0.057936	0.0163068	-0.0992877	0.112726	0.0669587	0.118292	0.155326
SGTC_1450	4112-4260		0.0579281	-0.00605301	-0.012662	0.0975954	0.0238481	-0.0245618	-0.00981647
SGTC_1806	st050005		0.0578767	0.0168098	0.0960673	0.0691689	0.098309	0.0425456	0.0459282
SGTC_1564	D-Arginine	D-isomer of arginine; arginine decarboxylase inhibitor.	0.057858	-0.0424889	-0.0413934	0.0934189	0.0682082	0.134268	0.174357
SGTC_607	4491-0986		0.0578214	0.0294762	0.117387	-0.0061944	0.033384	-0.0313871	0.0413408
SGTC_418	lividomycin a	An antibiotic.	0.0577466	0.146968	0.059517	-0.0648155	-0.0336098	0.0939327	0.0116175
SGTC_85	0868-0259		0.0577357	0.0854059	-0.0194681	-0.0211803	0.0201239	0.0769616	-0.018495
SGTC_2799	7812892		0.0577081	0.00864853	-0.0620361	-0.0249122	0.00785939	0.0313699	0.158036
SGTC_1119	parthenolide	Parthenolide specifically inhibits HDAC1 (histone deacetylase 1) without affecting other class I/II HDACs.	0.0576723	0.0907301	-0.00441008	0.00649777	-0.00187705	0.0398177	0.0200241
SGTC_2103	5378138		0.0576614	-0.0456617	0.0518615	0.0213517	0.0176692	0.114548	0.0461048
SGTC_1752	st044819		0.0576058	0.0515196	0.0369107	0.0462972	0.0595753	0.0169531	0.0366254
SGTC_2659	sanguinarine	Na+/K+-and Mg2++-ATPase inhibitor. Antimicrobial, anti-inflammatory and antioxidant properties. Induces apoptosis.	0.0575757	0.0874567	-0.00702025	0.0113054	0.00509441	0.0231	-0.0490767
SGTC_357	1325-0123		0.0575597	0.15561	0.0288206	-0.03394	0.0151833	0.00010781	-0.0193403
SGTC_395	anisomycin	Antibiotic isolated fromÂ Streptomyces griseolusÂ that inhibits protein synthesis. Acts by inhibiting peptidyl transferase activity in eukaryote ribosomes.	0.0575451	-0.0532089	0.0841683	0.0430581	0.045925	0.0622165	0.0464795
SGTC_1888	azatryptophan	An unusual alpha-amino acid with strong fluorescent activity that is used as a vehicle for probing the structure and dynamics of protein and peptides	0.0574669	-0.00956781	0.0583632	0.00192059	0.157371	0.046283	0.0920388
SGTC_2336	9001819		0.0574501	-0.00437247	-0.031887	0.00134322	0.0453355	0.0331509	0.309954
SGTC_285	1486-1325		0.0573318	0.0768305	-0.00220924	0.0138988	-0.0196078	0.0276655	0.0765806
SGTC_3146	9095609		0.0573226	0.0883876	0.0655622	-0.0445996	0.0760898	-0.0242514	-0.0150261
SGTC_1861	st057647		0.0572998	-0.0245278	0.0194632	0.0397798	-0.0076903	-0.0131115	0.15339
SGTC_2909	7941780		0.0572468	0.0635437	0.073552	-0.0053428	0.135392	0.0440805	0.0476002
SGTC_759	3486-0358		0.0572298	-0.0201442	0.0170957	-0.0810303	-0.00618754	0.0512277	0.00085419
SGTC_1974	st069448		0.0572045	0.0223711	-0.00252689	-0.0302514	0.0318327	0.0834694	0.103616
SGTC_2570	licareol		0.0570616	0.0149607	0.0134947	0.0871344	0.110606	0.0738289	0.11996
SGTC_713	1488-1073		0.0570268	0.0967561	0.00209832	-0.0113389	0.0182355	-0.0114968	0.0111874
SGTC_1064	honokiol	Inhibits phosporylation of AKT, SRC Kinases and induces apoptosis.	0.0569496	0.0479202	-0.00394093	0.0155456	0.036038	0.0289064	0.0397893
SGTC_1360	1598-0022		0.0569094	0.111648	0.000682065	0.00489395	0.0233492	-0.0247119	0.0196005
SGTC_3051	9093778		0.0568582	0.0786287	-0.034129	-0.0533235	0.0176951	0.045092	0.121561
SGTC_3277	9138724		0.0566308	0.00176368	-0.0150523	0.0212992	0.0332669	-0.0242857	0.0961379
SGTC_2580	diallyl disulphide	Diallyl disulfide is an efficient agent for detoxication of the cells. It significantly increases the production of the enzymeÂ glutathione S-transferaseÂ (GST), which bindsÂ electrophilicÂ toxins in the cell.	0.0566178	0.0586751	-0.0273575	0.106533	0.0298415	0.00442184	0.233897
SGTC_804	1595-0054	Stimulates phospholipase C.	0.0566069	-0.0367416	0.036466	0.0210467	0.00322818	0.0262703	0.308767
SGTC_2485	5633444		0.0566068	-0.00816731	0.0384857	-0.0109114	0.00755343	-0.0124624	0.264644
SGTC_1668	st014914		0.0565739	-0.0241946	-0.060176	0.0890747	0.10766	0.0305876	0.137844
SGTC_2490	carminic acid	Coloring matter from the insect Coccus cacti L. It is used in foods, pharmaceuticals, toiletries, etc., as a dye, and also has use as a microscopic stain and biological marker.	0.0564712	0.0215924	-0.0206177	0.0797867	0.0366378	0.0269438	0.0797393
SGTC_2037	5169046		0.0564128	-0.0239767	-0.0696936	-0.0292721	0.00522027	0.0117601	0.0640324
SGTC_3049	9092223		0.0563195	0.0231173	0.055095	0.0107955	0.0957311	0.00863645	-0.0137459
SGTC_496	calpeptin	A calpain inhibitor.	0.0561767	0.000510629	0.0195651	0.0354379	0.0706822	0.0205049	0.226985
SGTC_2646	retinol	A vitamin A analog and teratogen.	0.0560848	-0.00810194	0.0321771	-0.0541605	0.0820554	0.134309	0.0345064
SGTC_1440	4100-1550		0.0560606	0.0197533	-0.0235635	0.179868	0.036136	0.0188081	-0.0413915
SGTC_470	aa-861	aa-861 is a potent, selective and orally active 5-LO (5-lipoxygenase) inhibitor.	0.0560084	0.0651995	0.0846802	0.0282066	-0.00940522	-0.00577143	-0.00548098
SGTC_642	0335-0876		0.0559788	-0.0199714	-0.0327363	0.0212382	-0.000307109	0.0346052	0.378006
SGTC_3199	9111318		0.0558845	0.00443943	-0.0236383	0.0327301	0.0305227	0.00559188	0.07377
SGTC_1900	st060200		0.0558712	-0.00698043	-0.0150369	0.105942	0.106929	0.00011618	0.0925409
SGTC_1943	st076331		0.0557963	-0.00888923	0.0245613	0.0473034	0.0824018	0.0152309	0.0445338
SGTC_1993	st073995		0.0557402	0.059161	0.0310882	0.0348174	0.0598623	0.0495758	0.00665884
SGTC_1001	4048-4355		0.055679	-0.0330078	0.140038	0.0135906	0.00705943	-0.0883401	0.0499398
SGTC_904	1141-0088		0.0556659	0.0460597	0.200612	-0.0692488	0.104364	0.100844	0.131223
SGTC_1385	3091-4834		0.0555495	0.00185475	0.0410406	0.0511789	0.0595931	0.0330944	0.0191621
SGTC_3087	9117406		0.0555234	0.0423508	-0.00359007	0.00400169	0.129543	0.0770247	0.097847
SGTC_2321	7390090		0.055515	-0.0053058	0.0655791	0.0338846	0.0906555	0.0477781	0.018579
SGTC_3169	9102970		0.0555007	0.0301138	-0.0142619	-0.0345531	0.0830369	0.0964843	0.18383
SGTC_1936	st074407		0.0554928	-0.0369972	0.018304	-0.0423635	0.069078	0.0206879	0.274764
SGTC_935	2996-0153		0.0554638	0.00859441	0.0557799	0.0273098	0.0827569	0.0891953	0.0934168
SGTC_3037	9091026		0.0553719	0.00978574	0.0404397	0.039816	-0.006445	0.0249354	0.357669
SGTC_525	k781-2675		0.0552594	-0.00049689	0.0619054	0.0150521	0.061545	0.0100648	0.302815
SGTC_2017	5132927	Originally believed to exert its effects predominantly via monoamine oxidase inhibition, etryptamine was developed during the 1960s as an antidepressant by Upjohn as Monase but was withdrawn from potential commercial use due to an unacceptable incidence of agranulocytosis.	0.0551233	-0.00998057	-0.033903	0.112154	-0.0196808	-0.0222917	-0.0169326
SGTC_751	0833-0568		0.0550961	-0.0572996	0.0619835	0.0363536	0.127274	0.116019	0.0906812
SGTC_768	0384-0033		0.0550821	0.0091889	-0.00210923	0.0279884	-0.0520958	-0.0188775	0.157885
SGTC_2006	4011487		0.0550708	-0.0248594	0.0145625	0.0766319	0.0263894	-0.0255717	0.161431
SGTC_1223	0764-0573		0.0548329	0.135192	0.0830155	0.0578078	0.0212971	0.0175997	0.0434879
SGTC_1490	4089-0339		0.0547687	-0.0205519	0.0782701	0.0591431	-0.00693452	0.058001	0.128932
SGTC_2977	9011197		0.0545972	0.128004	0.0114086	-0.0437349	0.128118	0.105724	0.0486831
SGTC_2779	methotrexate	Methotrexate is an antineoplastic antimetabolite with immunosuppresent properties. Potent inhibitor of dihydrofolate reductase (DHFR), a key enzyme in folic acid biosynthesis.Methotrexate inhibits folate-dependent processes including DNA, RNA and methionine biosyntheis.	0.0545703	0.0389678	0.0689578	0.00838221	0.125394	-0.00579881	0.0167398
SGTC_26	0302-0163		0.05447	0.134115	-0.0720672	0.0537076	0.0842957	0.0879671	0.155743
SGTC_2506	ethyl hematommate	An allergen.	0.0544648	0.0409257	-0.00365519	0.0302024	0.0714847	-0.014597	0.00764931
SGTC_862	0452-0056		0.0544611	0.00943117	0.00519377	0.00171215	-0.0440572	0.0112657	0.212835
SGTC_2905	7799065		0.0544439	-0.0594633	0.0327025	0.00183172	0.0305867	0.0778966	0.0451263
SGTC_2079	5212404		0.0543799	0.171418	-0.0254963	-0.0346916	0.0665887	0.0882145	0.108833
SGTC_1930	st074634		0.0543784	-0.00550183	0.128449	0.0330593	0.159164	0.0598049	0.277487
SGTC_279	1273-0055		0.0543577	0.0442292	-0.0173256	0.0262604	-0.0382119	0.0183199	0.0932169
SGTC_972	1319-0219		0.0541802	-0.0138464	-0.0759216	0.0570561	0.0198702	0.0866738	-0.00873768
SGTC_2832	7992762		0.0541603	-0.0173979	0.0101908	0.00898888	0.0137257	0.0075868	0.0201501
SGTC_1407	3909-7909		0.0541218	-0.00948609	-0.0562948	0.0832948	0.0148575	0.160862	0.141726
SGTC_2663	amphotericin b	Amphotericin b is a polyene antifungal that binds irreversibly to ergosterol, resulting in disruption of membrane integrity and ultimately cell death.	0.0540788	-0.0194048	-0.012574	0.0120956	-0.0346684	0.0520899	-0.0488961
SGTC_928	2764-0428		0.0540746	-0.0147202	-0.0502496	-0.00147788	0.00436594	0.0191272	0.386797
SGTC_757	1066-0008		0.0540374	0.000456074	0.0642624	0.0145289	0.0553624	0.0767534	0.0503657
SGTC_341	1486-1430		0.0538458	0.0824855	-0.0298385	-0.000779812	0.150237	0.190635	0.1128
SGTC_2462	5162487		0.0538228	0.0348993	-0.0420651	-0.00655786	0.0341812	-0.0381411	-0.047451
SGTC_1451	4152-0210		0.0535791	0.0938714	-0.0345515	0.026072	0.0338446	0.0207747	0.0415346
SGTC_2703	st077852		0.0535036	-0.014587	-0.0138566	0.0387382	-0.00844809	0.131383	0.0324863
SGTC_2377	9073351		0.0533593	0.0784414	0.0718224	0.00866655	-0.0187017	0.0541429	0.0994247
SGTC_2068	5226020		0.0532864	0.00873357	0.0541699	0.0709411	0.0633885	-0.00311967	0.0339574
SGTC_1547	harmine	A monoamine oxidase inhibitor	0.053263	-0.0088738	0.0421588	0.0547927	0.0495286	0.0671393	0.208339
SGTC_586	0957-0265		0.0532033	0.010124	-0.0637808	0.0105005	-0.00326709	0.0195564	0.0950956
SGTC_3285	9112818		0.0531862	-0.00370599	-0.0310333	-0.0148973	0.0265201	0.0384125	0.239126
SGTC_658	3253-0951		0.0530736	-0.011012	-0.038962	0.120091	-0.0318183	-0.055053	0.00929571
SGTC_2539	epi(13)torulosol		0.053056	-0.0435224	-0.00471678	0.0301527	-0.00257435	0.0427231	0.0105162
SGTC_3154	9100113		0.0529465	0.0256861	-0.0142089	-0.0139083	0.0818558	0.0370787	0.289578
SGTC_477	mead ethanolamide		0.0529267	0.0370637	0.0485488	-0.00192731	-0.0085393	0.0532145	-0.0220808
SGTC_1635	st007035		0.0528612	0.0545395	-0.0149087	0.0498801	0.0493799	-0.0332235	-0.0725453
SGTC_1449	4112-4002		0.0528058	0.0940377	0.00922714	0.14825	0.163167	0.0710023	0.0751551
SGTC_1141	3253-0389		0.0527647	0.0205974	0.0576772	0.129252	0.0341657	0.0233745	0.107036
SGTC_2604	4'-hydroxychalcone		0.0526768	-0.00673509	-0.0276109	0.0333098	0.0114922	0.151247	0.0326528
SGTC_1349	flufenamic acid	A non-steroidal anti-inflammatory.	0.0526326	0.0307486	0.0580284	0.097941	0.0292915	-0.0297737	0.0739847
SGTC_3106	9121286		0.0526214	0.0381336	0.0970332	0.168359	0.0458628	0.00682234	0.0403129
SGTC_3220	9131269		0.052517	-0.00565917	0.0617624	0.070772	0.0648848	0.0249098	0.0946004
SGTC_674	0498-0004		0.0523094	0.030102	0.00558079	0.0391121	0.0419169	0.00109758	0.0542343
SGTC_1367	1812-0510		0.052276	0.0696608	-0.022797	0.0124422	0.00957722	0.102913	0.0244586
SGTC_436	n,n-dimethylsphingosine		0.0522307	-0.00577992	-0.0812092	0.18309	-0.0266588	0.00682738	0.0228487
SGTC_2265	7929201		0.0521709	0.016088	0.105325	0.0462617	0.171216	0.00299167	0.132686
SGTC_3	0833-0587		0.052114	-0.0223908	0.0600248	0.0414618	0.0711499	-0.0168869	0.14625
SGTC_1029	k015-0030		0.0520928	0.00415701	-0.0148465	0.0993284	-0.0246583	0.0360588	0.000156691
SGTC_156	3474-0145		0.0520515	0.00101908	0.0596556	-0.0226548	0.0116487	0.0166715	0.231459
SGTC_1729	st035615		0.0520235	0.0239028	-0.0318421	0.0545977	0.093451	0.00836901	0.0855695
SGTC_2868	9035608		0.0519606	0.041945	0.151789	-0.0296533	0.0110409	0.0214204	0.0301059
SGTC_957	1187-1561		0.0517633	-0.0222734	-0.0282733	0.0658843	0.200633	0.121276	0.0244185
SGTC_2294	7971431		0.0517376	-0.0506355	0.00112938	0.0555567	0.131906	0.0482183	0.0371518
SGTC_3172	9105863		0.0517205	-0.0239248	-0.0432801	0.0773306	0.010933	0.0308796	0.0508259
SGTC_2925	9010536		0.0516874	0.0420618	0.0370896	0.0332207	-0.0492495	-0.0413502	0.104112
SGTC_934	2950-0684		0.0516224	-0.0417224	0.063242	-0.0444947	0.0474986	0.151076	0.186321
SGTC_1944	st076371		0.0516212	0.0438881	0.0350732	-0.041737	0.0483092	0.0410709	0.135036
SGTC_2965	9082772		0.0516209	-0.0339597	0.0356442	0.0294182	0.0218546	0.0384668	0.0130411
SGTC_2858	9025781		0.0515909	-0.00178883	0.0453617	0.00819699	0.0133546	0.0792422	0.181647
SGTC_2760	etidronate	A chelator and antioxidant.	0.0515695	-0.0091896	0.0213758	0.036532	0.117597	0.0695095	0.156589
SGTC_2837	9008476		0.051251	0.096968	0.00205313	-0.0464487	-0.0325022	0.0507704	0.0416536
SGTC_1174	0739-0097		0.0512483	-0.014266	0.0677397	0.119441	0.0269526	-0.0347697	0.113428
SGTC_1756	st041558		0.0511645	0.0845518	0.00536371	0.0512436	-0.0197586	0.0322168	-0.0658014
SGTC_256	clotrimazole	Clotrimazole, an imidazole antifungal; inhibits lanosterolÂ 14Î±-demethylase, thereby preventing the conversion ofÂ lanosterolÂ toÂ ergosterol, an essential component of the fungalÂ cytoplasmic membrane.	0.0511551	-0.0284069	0.0231273	0.00489535	-0.0206587	0.00243146	0.0224767
SGTC_732	3970-1727		0.0511256	-0.0481631	-0.0818593	-0.0238442	0.00140985	0.0873947	0.0514822
SGTC_2551	apiole	A possible DNA adduct former.	0.0510305	0.0964934	-0.00659214	-0.0262921	-0.0329125	0.106294	-0.0311652
SGTC_2532	xanthone	An insecticide.	0.0510255	-0.0467307	0.0403473	0.00799886	-0.022552	-0.0620552	0.204554
SGTC_1383	3049-0032		0.0509921	0.0740757	0.0829842	0.0354303	0.0612652	0.00772889	0.0432512
SGTC_1289	0976-0073		0.0509161	0.14134	-0.0202312	0.014797	0.102638	0.0443626	-0.0125376
SGTC_989	1501-0895		0.0509158	0.0395484	0.0048439	0.0869098	-0.00147385	0.0405379	0.00880659
SGTC_2656	pseudo-anisatin	A neurotoxin.	0.0508931	0.00520304	-0.0171325	-0.0497715	-0.00261022	0.206412	0.110962
SGTC_1568	digitonin	DigitoninÂ is aÂ glycosideÂ obtained fromÂ Digitalis purpurea. As a detergent, it effectively water-solubilizesÂ lipids and has severalÂ membrane-related applications inÂ biochemistry, including solubilizingÂ membrane proteins, precipitatingÂ cholesterol, and permeabilizing cell membranes.	0.0508722	0.0277192	0.018053	-0.0157784	-0.0243775	-0.000815454	-0.0727718
SGTC_1189	1431-2119		0.0508658	0.121358	0.0135036	0.0820203	0.0837553	0.125814	0.0724589
SGTC_1052	3253-3998		0.0508141	0.0538653	0.0779081	0.175656	0.158209	0.117525	0.186129
SGTC_1269	0831-0796		0.0507056	-0.00167585	0.0739987	0.067606	0.0630321	0.0300454	0.0615905
SGTC_589	1227-0070		0.0506497	0.00777444	-0.0456726	0.013225	0.071069	0.0349918	0.339111
SGTC_200	k038-0079		0.0505373	-0.0124993	0.00377913	-0.0235827	-0.00951469	0.0267656	0.292896
SGTC_1764	st044502		0.0505081	0.048951	-0.0302958	0.00316145	-0.00942352	-0.0186762	0.0392019
SGTC_1507	4075-3230		0.0503777	0.0128302	0.0170112	0.0909886	0.0449928	0.044431	0.100609
SGTC_1436	4092-1007		0.0503238	-0.0104669	-0.0821842	0.118937	0.0547074	0.0321249	0.144309
SGTC_2066	5222451		0.0502779	-0.00881467	0.0117684	-0.0210363	0.0533611	-0.00728221	0.369992
SGTC_3007	9078383		0.0502253	0.0649972	0.0340315	0.0742299	0.166034	0.00969797	0.055555
SGTC_1891	st059073		0.0501014	0.0114496	0.054048	0.0456065	0.0839915	-0.00909199	-0.0445882
SGTC_2078	5212016		0.0500396	0.00970281	-0.0376424	0.104068	0.0660233	0.00576943	-0.00677058
SGTC_2519	cryptotanshinone	Cryptotanshinone is a natural product that exhibits antitumor activity via inhibition STAT3 activity. Displays antibacterial and anti-inflammatory activity and acts as an antidiabetes and antiobesity agent via activation of AMP-activated protein kinase (AMPK). Also inhibits acetylcholinesterase (AChE)	0.0500227	0.00176444	-0.017669	-0.0638782	-0.0305936	0.0556732	0.155338
SGTC_1447	4239-0816		0.0500073	0.157262	0.029172	-0.0645704	0.00359507	-0.0325234	0.0777536
SGTC_2369	9071472		0.0499588	0.0431172	0.128192	0.0672108	-0.0537758	-0.00362833	0.0597609
SGTC_963	1269-2853		0.0499021	0.119789	0.0979223	-0.0238682	0.0228869	0.0250779	-0.00413084
SGTC_469	w7	A calmodulin inhibitor.	0.0498724	0.00582764	-0.107669	0.116816	-0.000139876	0.0202797	-0.0385486
SGTC_2150	5556613		0.0498312	0.000245196	-0.0244579	0.0554103	0.0435051	0.0624816	-0.0010176
SGTC_1262	0737-0114		0.049783	0.0374311	-0.0417414	0.103561	0.00703395	0.0195821	0.0130122
SGTC_1068	loratadine	A H1Â histamine antagonist.	0.0497646	-0.0424145	0.0669754	0.0239311	0.0082291	-0.0322235	0.00926873
SGTC_2622	2-methoxyxanthone	A hepatoprotective.	0.0497407	-0.0454968	0.0341791	-0.0509737	0.0522962	-0.0215898	0.125077
SGTC_3286	9117135		0.0497273	0.03297	0.00128709	0.0966239	0.0931884	0.0264719	0.192719
SGTC_2422	chlorphenesin carbamate	A muscle relaxant with antifungal properties.	0.0496974	0.0706635	-0.0228845	-0.0021208	0.079962	0.0126495	0.000516974
SGTC_913	3487-1245		0.0496964	0.0725289	0.00366588	0.00120673	-0.00813469	0.0140414	0.0460607
SGTC_924	2046-0044		0.0495114	0.0430537	-0.0733738	0.0139938	0.00537248	0.0481539	0.0803807
SGTC_2248	tofa	TOFA (5-(Tetradecyloxy)-2-furoic acid) is a cell-permeable, potent, reversible, and competitive inhibitor of acetyl-CoA carboxylase (ACC), a key enzyme involved in fatty acid biosynthesis. Inhibits cellular fatty acid synthesis in a dose-dependent manner	0.0494407	-0.00279026	-0.01187	-0.00361513	0.0465634	0.0647965	0.232223
SGTC_42	0133-0086	Model of phenazepam hydroxylation.	0.049353	-0.0193293	-0.0316333	0.179205	0.0520834	0.0407321	0.0115653
SGTC_67	0335-0847		0.0492328	0.00603387	0.026956	-0.0511799	-0.0228707	0.0253388	0.29081
SGTC_806	3966-4455		0.049217	-0.00958946	-0.00172609	-0.0089096	0.0338261	0.0528344	0.0908768
SGTC_21	0849-0113		0.0490144	-0.0106834	0.105431	0.0693606	0.0630205	-0.00793133	0.152925
SGTC_3290	9121031		0.0488211	0.0881778	0.0752658	-0.0683978	0.0487288	0.00531204	0.0663357
SGTC_171	k064-0041		0.0487694	-0.00975819	-0.0389386	0.0081818	-0.0299297	0.0377091	-0.00762738
SGTC_1103	duloxetine	A selective serotonin reuptake inhibitor.	0.0487473	-0.00589739	-0.0634167	-0.00170125	0.044961	0.0659848	0.0664972
SGTC_3095	9117207		0.0486774	0.0188661	0.0645422	0.0568591	0.138963	-0.00799508	0.0584417
SGTC_277	nystatin	Nystatin is a polyene antifungal that binds irreversibly to ergosterol, resulting in disruption of membrane integrity and ultimately cell death.	0.0485272	0.138715	0.0179165	-0.0116827	0.0670198	-0.00604764	0.00403435
SGTC_1906	st060206		0.0484409	0.064	-0.00588134	0.0441818	0.0152836	0.00946118	0.0409154
SGTC_1105	epirubicin	An anthracycline which is the 4'-epi-isomer of doxorubicin. The compound exerts its antitumor effects by interference with the synthesis and function of DNA.	0.0484008	-0.029209	-0.0128306	-0.0115228	0.100984	0.0733246	0.164472
SGTC_240	5hr heat shock (37 degrees C) + streptovitacin		0.0483589	0.0326192	0.00385321	0.0577538	0.0268602	0.0424484	0.131291
SGTC_3254	9136651		0.0483447	-0.00668976	0.0913691	0.00933992	0.203695	0.048815	0.294103
SGTC_1807	st050092		0.0482514	-0.0375654	0.142343	0.122378	0.17744	0.096402	0.12582
SGTC_1463	k081-0032		0.0481787	-0.00174544	-0.0116908	-0.0448067	0.016223	0.109813	0.238999
SGTC_1650	st011916		0.0478794	-0.0285058	-0.0419457	0.118137	0.0799076	0.0299978	0.0403697
SGTC_547	1120-0019		0.0478599	-0.00760227	-0.0571764	-0.0241164	0.0225674	0.0331515	0.224061
SGTC_1221	2958-7315		0.0478367	0.013591	-0.00664417	0.00329867	0.0260346	0.0608424	-0.0232438
SGTC_1226	3909-7979		0.0478296	-0.00103082	0.0502807	-0.027368	-0.0182124	0.0339003	0.0875452
SGTC_479	n-linoleoylglycine	An anti-infammatory.	0.0477848	0.0663859	0.0231544	-0.0333826	0.0631248	0.0141821	0.0725356
SGTC_1083	didemethylchlorpromazine sulfoxide	A metabolite of chlorprazamine and quinoline alkaloid. Quinoline alkaloids readily oxidize, producing quinone and semiquinone derivatives that may lead to the formation of reactive oxygen species	0.0477264	-0.0193762	-0.00745661	0.0164232	-0.0476454	-0.00326788	0.198414
SGTC_931	2812-0076		0.0477216	-0.0225518	0.00903884	0.0322079	0.143273	0.0814626	0.164291
SGTC_24	0417-1663		0.047719	0.0949654	0.0577835	-0.0389538	-0.0222154	0.0701122	-0.00285201
SGTC_2679	rapamycin	Rapamycin is an potent immunosuppressive and anticancer drug. It forms a complex with FKBP12 that binds to and inhibits the molecular target of rapamycin (mTOR). mTOR is a member of the phosphoinositide kinase-related kinase (PIKK) family that enhances cellular proliferation via the phosphoinositol 3-kinase/Akt signaling pathway. Inhibition of this pathway by rapamycin blocks downstream elements …	0.0476609	-0.00900474	0.0263546	0.0260011	0.17632	0.0653898	0.210936
SGTC_579	4491-1009		0.0476555	0.0964348	0.0621462	0.0867534	0.0699847	0.0713158	-0.00110143
SGTC_68	0986-0284		0.0475827	0.0872217	-0.0238567	-0.00969324	0.107074	0.00619024	-0.0339961
SGTC_2566	crystal violet carbinol	Cationic dye that binds acidic phospholipids including cardiolipin.	0.0475019	-0.0219455	0.00265823	0.0794062	0.148479	0.0335484	0.031129
SGTC_1953	st076800		0.0474618	0.0502417	0.0672532	0.027899	0.0561867	-0.0202676	0.101819
SGTC_1747	st037496		0.0474464	-0.0279927	-0.032924	-0.00705919	0.111761	0.0570859	0.156199
SGTC_2209	5-(5-methyl-2-thenylidene)-Barbituric acid		0.0473715	0.037865	-0.000346168	0.118475	0.133372	-0.00531166	0.078033
SGTC_1356	1502-0781		0.0473558	0.0759015	-0.0436157	0.0477774	-0.0356293	-0.0450942	-0.0735673
SGTC_599	1935-0052		0.0473271	0.0522559	0.017564	-0.00875729	0.0461375	-0.00104071	0.0412612
SGTC_1126	isoteolin		0.0472047	-0.0357936	0.00214453	0.0544918	0.0375858	-0.016855	0.0743942
SGTC_2571	chrysanthemic acid	An insecticide.	0.0471955	-0.0258291	-0.0458134	-0.00529484	0.0756956	-0.0124236	0.124593
SGTC_1880	MG-132	MG-132 [Z-Leu-Leu-Leu-CHO] is a proteasome inhibitor, often used as a tool for perturbing the proteasome-regulated degradation of intracellular proteins.	0.0471612	-0.0351944	0.026102	0.00831453	-0.0139911	0.00294388	-0.0628022
SGTC_1239	0337-0584		0.0471478	-0.0220209	0.0255997	-0.00718306	0.0588049	-0.0379913	0.272224
SGTC_3091	9116372		0.0471159	0.041218	0.0130201	0.146682	-0.00098766	0.0650072	0.0753209
SGTC_1187	1391-0724		0.0467918	0.084212	-0.00735587	-0.00453776	0.0514364	0.0816878	0.0283081
SGTC_3003	9075612		0.0466958	0.000393491	0.0513251	0.0512563	-0.0047156	0.076089	0.0829102
SGTC_926	2268-1401		0.046509	0.0676336	0.028256	-0.0014136	-0.0262922	-0.00268539	0.0519219
SGTC_502	l-744,832	L-744,832 is a Ras farnesyltransferase inhibitor that has been demonstrated to induce tumor regression.	0.0464175	-0.00801178	-0.0108588	0.0365895	0.00879063	0.0746979	0.0671361
SGTC_2558	carylophyllene oxide	An oxygenated terpenoid and antifungal agent.	0.0464064	-0.0332584	-0.0158288	0.255994	0.0846435	0.0710187	0.0761011
SGTC_1577	3(2'-chlorophenyl)-7-ethoxycoumarin		0.0463971	0.0278114	-0.0489895	0.168778	0.0452967	0.0355336	0.160623
SGTC_1940	st075990		0.046373	0.0592878	0.0499009	0.0643313	0.10059	-0.0112657	-0.0118344
SGTC_667	1498-1044		0.0462687	0.0146495	-0.0288224	0.154966	0.0124935	0.0717639	0.0976804
SGTC_1098	clofazimine	Several studies have pointed to inhibition of K+Â transport. However, it is not clear whether inhibition results from a specific interaction(s) or is a consequence of membrane disruption. CFZ also is reported to bind to DNA	0.046249	-0.0101781	-0.00806579	-0.0175686	0.0380434	0.0291977	0.346773
SGTC_2125	5246583		0.0462005	0.024533	0.01588	-0.048909	0.000782195	0.0160536	0.304841
SGTC_3313	9133968		0.0461794	0.162578	-0.0189554	-0.0361375	0.0130711	0.113717	0.0599407
SGTC_1619	st003326		0.0461786	-0.022309	-0.0191235	0.103839	0.0823306	0.0148277	0.0762378
SGTC_2381	9035592		0.0461565	0.0301652	0.048657	-0.0455569	0.100132	0.0693536	-0.0231007
SGTC_3237	9133362		0.0461241	-0.0393571	-0.0483772	0.0514646	0.0271529	0.0602678	0.180388
SGTC_1754	st042065		0.0461018	-0.00724882	0.0325036	0.0127052	0.0731443	0.0381877	0.418547
SGTC_2493	resveratrol	Resveratrol is a phenolic phytoalexin found in grape skin and other plants. It has intracellular antioxidant activity and activates SIRT1, a NAD+-dependent histone deacetylase.	0.0460485	0.078987	-0.00360047	-0.0289745	0.00865706	0.000145037	0.0117873
SGTC_262	fenpropimorph	Fenpropimorph is a morpholineÂ antifungal drugÂ that inhibitsÂ D14 reductaseÂ andÂ D7-D8 isomerase, which depletesÂ ergosterolÂ and causesÂ ignosterolÂ to accumulate in fungalÂ cytoplasmicÂ cell membranes.	0.0459886	-0.0329026	0.0215519	-0.00970741	0.0141072	-0.0184839	0.162709
SGTC_2730	imipramine	A tricyclic antidepressant.	0.0459692	0.147835	0.0150891	0.0194699	0.152288	0.0173181	0.0592758
SGTC_2094	5332512		0.0458947	0.0852738	0.043496	-0.056322	-0.00604014	0.0276167	0.00277739
SGTC_2994	9053520		0.0458848	0.0238342	-0.0262502	-0.0514656	0.0810361	0.0765626	0.0144239
SGTC_1102	cgs 12066b	A 5-HT1BÂ full agonist.	0.0458632	0.0312933	-0.0392277	0.01547	-0.0150806	-0.0451567	-0.0129481
SGTC_3120	9124077		0.0458522	-0.00279549	-0.0383577	0.00558464	0.0273789	-0.000752594	0.312468
SGTC_3355	9151058		0.0457925	0.00154253	-0.0425174	0.0722193	0.075976	0.126613	0.141796
SGTC_921	1561-0023		0.0457661	0.0388353	-0.0338482	0.024727	0.0779294	-0.00350567	0.164147
SGTC_2819	7996655		0.0456575	0.0507535	0.0113097	0.0272747	-0.031413	0.0750408	0.0503779
SGTC_2851	9015922		0.0456389	-0.00508443	0.0666781	-0.0370429	-0.00438685	0.0345246	0.142429
SGTC_403	arphamenine a	An arginine aminopeptidase inhibitor.	0.0456382	-0.0215445	0.0138086	0.00520354	0.0192219	0.052802	0.0172751
SGTC_2160	5660466		0.0456015	0.0609654	0.00773885	0.0133929	0.0390156	0.0326468	0.0403823
SGTC_1113	artemisinin	An anti-malaria and mitochondrial poison.	0.0455961	0.00349096	-0.0284925	0.0107786	0.0890432	0.058227	0.198789
SGTC_219	mitoxanthrone	Mitoxantrone is a cytostatic anthracenedione that intercalates in DNA and increases the incidence of double-strand breaks by stabilizing the cleavable complex of topoisomerase II and DNA.	0.0455452	0.00150921	0.188444	-0.00468092	0.190586	-0.00950558	0.107907
SGTC_278	4092-0821		0.0455306	0.0417277	-0.00820857	-0.00181678	-0.0261524	0.00510084	0.0777066
SGTC_2533	agelasine	AgelasinesÂ are 7,9-dialkylpuriniumÂ saltsÂ isolated from marineÂ spongesÂ (AgelasÂ sp.) that have been associated with inhibition of Na/K-ATPase.	0.0455047	-0.0155361	-0.0429823	-0.0187585	0.0567798	0.0681326	0.163735
SGTC_3190	9110366		0.0454401	0.0617414	0.0761461	-0.0116514	0.00407641	0.080777	0.0130709
SGTC_1887	st057648		0.0453736	0.0465852	0.0391496	0.106149	0.120144	0.0793278	0.0781643
SGTC_571	k831-0106		0.0452718	-0.0276533	0.0570312	0.0581043	0.0657516	0.139042	0.0490368
SGTC_2812	7970281		0.0451358	0.000844538	-0.0812573	-0.0184491	0.0876213	0.0175364	0.116095
SGTC_2096	5468907		0.0450761	-0.0384697	0.0254532	-0.025679	0.0541261	0.0403959	0.0981211
SGTC_533	1222-0222		0.0450445	-0.0134263	0.0806976	0.0149035	0.0841728	-0.0474641	0.055514
SGTC_41	0478-0632		0.0450352	0.0716158	0.0469077	-0.0600451	0.0683118	0.040489	0.0329462
SGTC_505	gw-5074	A c-Raf1 kinase inhibitor, which inhibits other kinases.	0.0449784	0.0274793	0.00108068	0.00500804	-0.0292864	0.0181597	0.135762
SGTC_352	k048-0007		0.0449307	-0.017583	0.0266352	0.0608776	-0.0365197	-0.0509299	-0.0241856
SGTC_2573	2',4'-dihydroxychalcone	A potent inhibitor of glutathione S-transferases.	0.0449215	0.00317432	0.0107635	0.047813	0.0238697	-0.00330692	-0.0208757
SGTC_1845	st056753		0.0448897	-0.0167468	0.121967	0.109937	0.234871	0.0107216	0.1367
SGTC_14	0354-0009		0.0448399	0.0863208	-0.0280187	0.0486852	-0.0242347	0.0205149	0.020693
SGTC_2495	cafestol	An anti-infammatory.	0.04481	0.0097397	-0.0189346	-0.00739807	0.0957599	0.0780415	0.158962
SGTC_2478	5763493		0.0448068	0.0899666	0.0153155	-0.042163	-0.0218204	0.0235404	0.0206739
SGTC_1855	st056195		0.0447615	0.0747148	-0.112233	-0.00630813	-0.0222878	0.00222479	0.0815147
SGTC_794	k038-0031		0.0447287	-0.00174814	0.0248327	-0.035733	-0.0184356	0.0143431	0.324513
SGTC_1328	1441-0025		0.0446449	-0.0330539	0.0574634	-0.00851995	0.105877	0.0646724	0.0188954
SGTC_1819	st053448		0.0446434	0.247972	-0.0147542	-0.0968	-0.0581866	0.0402325	-0.0140005
SGTC_2867	9039098		0.0446139	-0.0166886	0.0364707	0.0637459	0.00204158	0.0192072	0.217817
SGTC_74	000s-0487		0.0445152	0.137787	0.0613783	-0.0279391	0.0861898	-0.020944	-0.0107841
SGTC_2876	9059903		0.0444938	0.0454362	0.0771289	-0.0315508	-0.0220046	0.0498519	0.0302578
SGTC_2155	5570423		0.0444735	-0.0486569	-0.00700248	0.0927678	0.00816723	0.000743773	-0.0186718
SGTC_238	5hr heat shock (37 degrees C) + nsc-638432		0.0444655	-0.00185857	0.0661738	0.0511369	0.114021	0.111039	0.128587
SGTC_1176	0848-0131		0.0443004	0.0916014	0.128897	0.121884	0.0734477	0.029894	0.0141598
SGTC_3072	9116419		0.0442574	0.0192129	0.0178351	0.0789679	0.180929	0.0309857	0.0642542
SGTC_504	lovastatin	Lovastatin is a specific inhibitor of HMG-CoA reductase. HMG-CoA reductase catalyzes the conversion of HMG-CoA to mevalonate, an early step in cholesterol biosynthesis.	0.0442303	-0.0191534	-0.037422	0.160234	0.0556959	-0.0104924	0.148289
SGTC_1676	st018489		0.0442298	-0.0406638	0.0497965	0.0137185	0.0207317	0.0673475	0.0386511
SGTC_52	0329-0193		0.0442192	-0.0269238	0.0262768	0.00912005	0.0851955	0.0330992	0.167132
SGTC_1664	st014217		0.0442001	-0.0263035	0.0299872	-0.0340142	0.0441627	0.0621038	0.1105
SGTC_1695	st026914		0.0441756	0.0807768	0.0141367	-0.0107176	0.103495	-0.0461494	0.00695806
SGTC_3247	9135149		0.044072	-0.0180196	0.072558	-0.00441545	0.172168	0.0390406	0.247229
SGTC_1078	idebenone	A short-chain Coenzyme Q analog that enhances superoxide formation, presumably by mediating electron transfer from N2 to oxygen.	0.0440334	0.0134891	0.0778095	0.124112	0.0363276	0.0729486	0.0191463
SGTC_2947	9072639		0.0439125	0.00580585	-0.0702815	0.0143512	0.0352405	0.0241018	0.268435
SGTC_3108	9121785		0.0439035	-0.0358776	-0.00488499	-0.0126211	0.0738502	0.184898	0.0691752
SGTC_2511	berberine	BerberineÂ is aÂ quaternary ammoniumÂ salt andÂ isoquinolineÂ alkaloid.	0.0438856	0.0038115	0.087401	-0.0295138	0.0714107	0.0492543	0.297157
SGTC_2259	7964009		0.0438828	-0.0554209	-0.0106871	0.000118812	-0.0221645	0.0218282	0.0775572
SGTC_699	0375-0592		0.0437154	0.0229931	0.043117	0.0407398	0.0160688	0.009645	-0.0224451
SGTC_1197	1601-0112		0.0436855	0.0485912	0.0739449	0.0262965	0.0741613	0.0686175	0.0819344
SGTC_2956	9076196		0.043681	0.192453	-0.0105638	-0.0476492	-0.0128653	0.0708208	0.0334959
SGTC_2743	auranofin	Auranofin is used to treat rheumatoid arthritis and is thought to inhibit selenocysteine-containing flavoreductases (thioredoxin reductase and thioredoxin glutathione reductase) more effectively than non Se-containing ones (glutathione reductase); this preference has been ascribed to the high affinity of selenium for gold.	0.0436716	-0.0137033	-0.0110275	0.0291378	0.106534	0.0383105	0.197092
SGTC_2460	5552655		0.0436677	-0.00391357	-0.0232605	0.161298	0.0891881	-0.0139566	0.156204
SGTC_770	0389-1121		0.0436248	-0.00379173	-0.0224126	0.133164	0.113346	0.0210918	0.351373
SGTC_2803	7707263		0.043534	-0.0550166	-0.00982791	0.147824	0.00332637	-0.0435908	0.0971199
SGTC_2476	5806916		0.0435303	-0.0526585	0.032583	0.00895249	0.0011873	-0.0118682	-0.0317811
SGTC_1456	k015-0012		0.0434617	0.0490015	-0.0884923	0.166949	0.0394496	-0.0399431	0.097972
SGTC_3061	glucosamine	and experimental redox chemotherapeutic	0.0434291	0.0197109	-0.075908	-0.0191734	-0.00671199	0.0744916	0.0572611
SGTC_1086	cerivastatin	Cerevastatin is a specific inhibitor of HMG-CoA reductase. HMG-CoA reductase is the enzyme that catalyzes the conversion of HMG-CoA to mevalonate, an early step in cholesterol biosynthesis. Cerivastatin was withdrawn from the market due to reports of fatal rhabdomyolysis.	0.0433501	-0.0363751	-0.0642014	0.0877782	0.0079097	0.113687	0.00835509
SGTC_2855	9016525		0.0432898	-0.0250448	-0.0100969	-0.0488901	0.0498399	0.0197012	-0.0414382
SGTC_918	glabranin	Also referred to as licorice root.	0.0432764	0.0486869	0.144454	-0.0185627	0.0190125	0.0672257	0.1377
SGTC_930	2810-3379		0.0432583	0.0262164	0.0174229	-0.0686913	-0.0031411	0.0923284	0.0618052
SGTC_1799	st045822		0.0431729	0.0493629	-0.026824	0.0350641	0.0220309	-0.0259997	0.00896154
SGTC_2090	5301565		0.0430595	-0.036502	0.00742731	0.0555345	-0.00878451	-0.0181721	0.239348
SGTC_92	0063-0024		0.0430182	-0.0286465	0.0123345	-0.0360542	-0.00339655	0.0835151	-0.0269392
SGTC_1292	0kpi-0043		0.0429929	0.00133326	0.062703	0.0983815	0.0326263	0.075898	-0.0146794
SGTC_2723	salbutamol	Î²2-adrenoceptor agonist.	0.0429763	-0.0260397	0.00417299	0.043754	0.00321726	0.0133512	-0.0256266
SGTC_1424	4048-1941		0.0427943	0.034458	0.0342727	0.0371772	0.0129305	0.0532189	0.125849
SGTC_128	0906-2981		0.042694	-0.0486873	0.0605505	-0.023725	0.149807	0.0303383	0.149407
SGTC_1666	st014829		0.0426574	0.100671	0.0323244	-0.0171049	0.0613496	-0.0147764	0.0519585
SGTC_3283	9109332		0.0426292	-0.0364491	-0.0117393	-0.0163394	0.0585443	-0.0300452	-0.0142395
SGTC_1629	st005085		0.0425198	0.0343072	-0.0175985	0.0644084	0.0433383	-0.000664343	0.0402203
SGTC_2784	7567673		0.0424791	-0.0669637	0.0180122	0.0573363	-0.0207576	-0.0710554	0.0757255
SGTC_1118	chelidonine	Benzophenanthridine derived from scoulerine from Chelidonium majus; putative GST and MDR inhibitor.	0.0423809	0.0130992	0.0531352	0.198811	-0.0114587	0.0306939	0.0112152
SGTC_3322	9139058		0.0423751	-0.0145169	-0.033041	-0.0287216	0.0347117	0.0435881	0.369756
SGTC_886	0866-0150		0.042368	0.0530817	-0.0675611	0.00654901	0.0622822	0.129145	0.146379
SGTC_893	0958-0369		0.0423544	-0.0179754	-0.0514089	0.0594346	0.0297824	0.0494814	0.0752741
SGTC_1627	st003713		0.0423492	0.0446189	-0.0192544	0.000951654	0.083983	0.0160801	0.11794
SGTC_1302	1159-0335		0.042334	0.171783	-0.0855946	0.00221084	0.013555	0.00127759	0.0164788
SGTC_966	1300-0360		0.0422962	0.0305047	0.0701337	-0.0191525	0.0616066	0.150259	0.146536
SGTC_69	0096-0274		0.0422696	0.0462996	-0.0335577	-0.026109	0.0548948	0.0341504	0.24297
SGTC_696	1560-0013		0.0422577	0.142725	0.0272359	0.00204636	0.0713711	0.161721	0.0810418
SGTC_2774	tamoxifen	Used for treating and preventing breast cancer, tamoxifen competitively inhibits the binding of estradiol to estrogen receptors, thereby preventing the receptor from binding to the estrogen-response element on DNA. The result is a reduction in DNA synthesis and cellular response to estrogen.	0.0422442	-0.0203159	-0.0502258	-0.00812519	0.0398315	0.114187	0.178622
SGTC_2513	baicalein	Baicalein is a cell-permeable flavone, originally isolated from the roots ofÂ Scutellaria baicalensis; inhibits cellular Ca2+Â uptake; may also act as an iron chelator.	0.0422084	0.0654494	0.0229716	-0.00382748	0.0284794	0.156959	0.0657029
SGTC_1288	0973-0013		0.0421762	0.0345187	0.0211323	0.0330423	0.168984	0.0397127	0.0541558
SGTC_973	1325-0077		0.0421313	-0.0242663	-0.0341734	0.0374547	0.031757	0.00077044	-0.0548881
SGTC_2047	4141938		0.0421102	0.0429964	0.0248422	0.0456336	0.000342668	-0.0101891	0.0549734
SGTC_1588	farnesol	Farnesol is a polyprenyl alcohol found in plant essential oils. Induces apoptosis in cell cultures.	0.0420296	0.0693404	0.0883467	0.280449	0.0401604	0.0468588	0.127174
SGTC_3170	9103054		0.0420235	0.0270517	0.0249948	-0.00479686	0.107044	0.0968226	0.176075
SGTC_3075	9116269		0.0420212	-0.0269907	0.0275431	-0.0669982	0.125954	0.142614	0.221795
SGTC_2766	oltipraz	Oltipraz is an antischistosomiasis drug found to inhibit carcinogenesis. Its mechanism of action is believed to be the induction of phase II detoxifying enzymes resulting in diminished carcinogen-DNA binding.	0.0420205	-0.00344765	-0.0312529	-0.00133217	0.0218123	-0.00403125	0.207838
SGTC_211	3455-0679		0.0419145	0.0402356	0.020907	-0.0199506	0.0993623	0.0192968	0.0326327
SGTC_2388	9080168		0.0418441	0.00745209	-0.023386	-0.0407405	0.0149671	0.100453	0.116789
SGTC_534	k292-0788		0.0418203	0.0382482	-0.0890115	-0.0170296	-0.0199845	-0.0175019	0.0618506
SGTC_2085	5307070		0.0418124	-0.00485498	0.0938218	-0.00967001	0.0144025	0.0241921	0.0960235
SGTC_3253	9135987		0.041805	0.00838383	0.0196649	-0.00327391	-0.0376485	0.0249451	0.12292
SGTC_1405	3909-7894		0.0416958	-0.0359146	-0.00321886	0.166152	0.0162987	0.0994631	0.00684725
SGTC_57	miconazole	Miconazole, an imidazole, is a topically used antifungal that acts by inhibiting lanosterol 14Î±-demethylase, thereby preventing the conversion ofÂ lanosterolÂ toÂ ergosterol, an essential component of the fungalÂ cytoplasmic membrane.	0.0416726	-0.00922073	-0.0236757	0.026361	0.0275261	-0.00731723	-0.049805
SGTC_1964	st076914		0.0415758	0.0348235	0.00456578	0.029864	0.0650421	0.0378502	0.159575
SGTC_1442	4112-3290		0.0415648	0.194442	0.056445	-0.00355134	0.141046	0.0453443	0.0682041
SGTC_2200	6600604		0.04153	-0.0230637	0.0715607	0.050327	0.0233234	-0.00258982	0.277384
SGTC_1774	st048371		0.0414758	-0.00113902	-0.0449758	0.0194871	-0.00656883	0.0903314	0.187519
SGTC_2217	6934799		0.0414632	-0.0492819	0.0350017	-0.0407763	0.00780339	0.0939862	-0.00111593
SGTC_313	3474-0040		0.0414188	-0.0225632	0.0444672	0.0391649	0.0687309	0.00417237	0.102921
SGTC_1536	cytidine-2',3'-monophosphoric acid; 3'-cytidylic acid	A nucleotide analog.	0.041099	0.0272322	-0.0226577	-0.0508231	0.103708	0.0784062	0.157935
SGTC_3125	9127534		0.0410059	0.0579287	0.0794388	-0.0492184	-0.0110295	-0.0734451	-0.00375303
SGTC_524	r073-0010		0.0409385	-0.0493763	0.0355323	0.0770134	0.0289367	-0.0289203	0.0846469
SGTC_1724	st037281		0.0409039	-0.0103909	0.0145138	0.168925	-0.00205836	0.0281065	0.0656028
SGTC_1670	st016595		0.0408763	-0.0326762	0.0788874	-0.0202623	0.0967465	0.00176139	-0.00457713
SGTC_1826	st055655		0.0408453	0.00211952	-0.00580469	0.0465079	0.0955685	0.0273297	-0.0329805
SGTC_3062	9077494		0.0408111	-0.016778	0.0302896	0.0694858	0.0852703	0.010882	0.0411069
SGTC_557	1315-0110		0.0407892	-0.0322097	0.000525353	0.117847	0.0343082	-0.00790247	0.145457
SGTC_445	e6 berbamine	A calcium/calmodulin antagonist.	0.0407174	-0.0207742	0.011657	0.0268596	0.0494479	0.0179269	0.309608
SGTC_2442	5158906		0.0407141	0.00838571	0.000563713	-0.060282	0.052817	0.222017	0.168185
SGTC_1912	st060209		0.0407061	0.158661	0.105504	0.0472338	0.173285	0.0684313	0.0753821
SGTC_3002	9075603		0.0404395	-0.0175244	-0.00578018	0.0301082	0.0329096	0.0597077	0.145391
SGTC_1479	0549-0158		0.0403831	0.011696	0.0320584	0.0244805	0.0679241	0.0321292	0.0539658
SGTC_1555	citronellol	A terpine precursor.	0.0403713	-0.0440448	0.0976833	0.0616602	0.0980703	0.0973364	0.0745594
SGTC_1508	1080-0625		0.0403537	0.0637047	0.0668896	-0.00992453	-0.00245694	0.0635346	0.0540696
SGTC_2697	mebhydrolin	H1 Histamine receptor antagonist.	0.0403132	-0.0142287	0.0560171	0.0419259	0.000227653	-0.0157333	0.225494
SGTC_45	0kpi-0036		0.0402678	-0.0224359	0.189732	0.0658921	0.0823896	0.121824	0.152046
SGTC_437	s-farnesyl-l-cysteine methyl ester	Stimulates the multidrug resistance transporter ATPase activity (4-5-fold at 10-20 ÂµM) and competes for drug binding.	0.0401309	0.0215876	0.048343	-0.0240734	-0.00543572	0.0432087	0.0103699
SGTC_1748	st037455		0.0399472	-0.00302295	0.0499253	0.020203	0.029661	0.00392837	0.0859431
SGTC_1388	3346-4487		0.039933	-0.0302233	-0.0577775	-0.0318458	0.0519219	0.00691465	0.0288855
SGTC_2740	felodipine	L-type calcium channel blocker	0.0399253	0.0469077	0.0258954	0.0363423	0.0257143	0.0491564	-0.00564823
SGTC_2260	7964312		0.0398941	0.01929	-0.00752847	0.0306272	0.0108369	0.0578285	-0.00594785
SGTC_1188	1403-0014		0.0398763	0.0786271	-0.0193602	0.00392315	0.0896338	0.00746798	0.000114006
SGTC_1857	st056007		0.0397813	0.137595	0.0914741	-0.0545714	-0.02585	0.010622	-0.0448027
SGTC_608	k048-0125		0.0397412	-0.00430412	0.110519	0.0381559	0.093294	0.00769915	0.258725
SGTC_554	4483-2211		0.0396697	-0.00493346	0.00872946	0.0323693	-0.0117762	-0.0455618	0.0277769
SGTC_897	1000-0139		0.0395225	-0.0322907	-0.0492459	0.0338201	0.0949141	-0.0725725	0.229735
SGTC_1801	st050089		0.0394579	-0.0232518	0.0167441	0.033121	-0.00113499	0.0219849	0.273466
SGTC_1018	4259-0013		0.0394253	0.0132661	-0.0542547	0.0534212	0.195137	0.0254639	0.0783779
SGTC_301	4119-0100	A tricyclic antidepressant that acts by reducing the re-uptake of norepinephrine and serotonin in the central nervous system, thereby enhancing the effects of these neurotransmitters. This drug also binds to alpha-adrenergic, histaminergic, and cholinergic receptors which are responsible for the many side effects seen with this agent.	0.0393763	-0.0148439	0.0480382	0.0294314	0.0878882	0.0193902	0.127927
SGTC_2810	7959871		0.0393391	-0.0292736	-0.00709204	0.0899277	0.0128678	-0.060811	-0.0196658
SGTC_3269	9137823		0.0392611	0.10207	0.00951604	0.0726332	0.0308488	0.0673947	0.107818
SGTC_1171	0368-0077		0.0392481	-0.0202638	-0.0246741	0.0169764	0.0370832	0.0957663	0.257645
SGTC_2470	5664817		0.0391247	-0.0607176	0.0713166	0.0418914	0.088261	-0.0498228	0.100844
SGTC_2736	butenafine	Butenafine inhibits squalene epoxidase, an enzyme in the ergosterol biosynthetic pathway. Because ergosterol is part of the fungal cell membrane butenafine is thought to change cell membrane permeability, ultimately resulting in fungal cell lysis.	0.0390654	0.0499242	0.121688	-0.0223432	-0.0572446	0.0297324	0.0287202
SGTC_1924	st058459		0.0390141	0.0296415	0.00565534	-0.079476	0.022481	0.0844586	-0.0461511
SGTC_196	k015-0023		0.0389895	-0.00957129	-0.0799182	0.12344	0.0652144	-0.00662077	0.082418
SGTC_3291	9121177		0.038969	0.0337397	-0.0577073	-0.0108599	0.0711267	0.0163617	0.0984293
SGTC_738	1315-0003		0.0388205	0.157459	0.0985084	-0.039125	-0.0290044	0.0231937	-0.0151146
SGTC_107	0358-0022		0.0387702	0.0242155	0.000786744	-0.0403375	-0.0455475	0.0411181	0.094005
SGTC_750	4073-0104		0.0387378	0.0722515	0.0119368	-0.0495491	0.0563433	0.0138972	0.0406993
SGTC_368	fentichlor	A pesticide.	0.0387338	0.0735767	0.0800794	0.00533862	0.0144874	0.00980134	0.0399412
SGTC_2486	5283202		0.0387292	0.0766471	0.00332346	-0.0113585	-0.0408506	0.0442853	0.0100883
SGTC_576	1073-0113		0.0386733	-0.0131948	0.0345872	0.00132508	0.0293097	0.00250444	0.263309
SGTC_1308	1187-1617		0.0385527	0.0408863	-0.0123017	0.0388427	-0.0271743	-0.0914397	0.0321207
SGTC_2018	5133068		0.0384796	0.108249	0.0755831	0.0842414	0.0409984	-0.0252572	0.0600341
SGTC_2943	9068529		0.0384721	0.00636837	-0.0286857	-0.0485922	-0.000504612	0.0409256	0.0334113
SGTC_1610	st001799		0.0384496	0.00783272	-0.020604	-0.00116069	0.0453474	0.0122751	-0.0153534
SGTC_1513	0337-0559		0.0383419	0.0027067	-0.0749062	0.0244542	0.0564411	0.0045779	0.0404452
SGTC_1996	st072960		0.0382929	-0.000879234	-0.0655835	0.0117444	-0.0564494	0.196964	0.0884389
SGTC_1958	st076513		0.0382879	0.000261077	0.0496599	-0.00472677	0.10628	0.103926	0.0524262
SGTC_2030	5175110		0.0382871	-0.0108186	0.0228373	0.109537	-0.0170049	0.0321001	0.10926
SGTC_1333	1482-0047		0.0382173	0.0226305	-0.0234475	-0.0162629	-0.0168604	0.165805	0.0348238
SGTC_1829	berberine	BerberineÂ is aÂ quaternary ammoniumÂ salt andÂ isoquinolineÂ alkaloid.	0.0382155	-0.0053625	0.053293	-0.0190884	0.0139478	0.00390471	0.219127
SGTC_2370	9071495		0.0381467	0.00751521	-0.039665	-0.0271104	0.128997	0.0483694	0.11415
SGTC_1679	4130-1276		0.0380984	-0.0126819	-0.0150566	0.0203523	0.0471571	0.0302411	0.178615
SGTC_358	0075-0058		0.038031	0.115392	0.0549174	-0.0917741	0.0324421	0.141127	0.0813101
SGTC_896	0964-0007		0.0379582	-0.0257235	-0.0349911	0.105149	0.0170559	-0.0420641	-0.0861039
SGTC_2091	4-phenylthiadiazole		0.037909	-0.0145484	-0.0268444	-0.0346673	0.0476659	0.0476003	-0.00296308
SGTC_609	0986-0026		0.037829	0.0758195	0.0409852	-0.00870338	-0.022879	0.016417	0.0349082
SGTC_1999	st074831		0.0378218	0.0963397	-0.0211925	-0.0161081	0.0348937	0.00111922	-0.0161551
SGTC_2123	5259487		0.0377527	0.0846818	-0.0128469	-0.0198999	-0.0261119	0.00457664	0.116852
SGTC_232	clozapine	An adrenergic, cholinergic, GABAAÂ andÂ histaminergicÂ receptor agonist.	0.0377238	-0.019061	0.0516763	0.0509931	0.0559279	0.00258354	0.149936
SGTC_3046	9092212		0.0376618	0.0554691	-0.0456892	-0.0606464	-0.0424045	0.133733	0.0454961
SGTC_2484	5809818		0.0375466	-0.0107641	-0.0109361	-0.0340988	0.0280544	0.00247209	0.0347602
SGTC_2247	cerulenin	Cerulenin, an antibiotic and antifungal, is an inhibitor of fatty acid biosynthesis.	0.0375334	0.0346206	0.0149376	0.0933235	0.0446437	0.0852836	0.0119703
SGTC_1692	fluoroquinolonic acid	Also called cipro. Inhibits gyrases and topoisomerase 1 and 2	0.0374908	0.0509157	0.0200038	-0.0294203	0.0620855	0.130481	0.191965
SGTC_778	3456-2434		0.0374573	0.013108	-0.0212782	0.0666696	0.0695983	-0.0850735	-0.0632716
SGTC_864	0469-0573		0.037447	0.058975	0.0195823	-0.0307665	0.0694823	0.0542271	0.0174162
SGTC_328	k915-0120		0.0374405	-0.0160559	0.148786	0.0102096	0.0345472	0.0670061	0.193953
SGTC_3196	9111891		0.0374241	0.184552	-0.00374666	-0.0478625	0.0159048	0.0706029	0.103703
SGTC_3116	9124943		0.0373409	0.0400347	0.0327306	0.0195811	0.0253232	0.0930059	0.00369027
SGTC_2127	5253358		0.0373228	-0.0435479	0.021048	0.105456	0.118052	0.0870086	0.0794003
SGTC_2520	obtusaquinone		0.0372976	0.0179369	0.00392104	0.039892	0.0638	0.0483659	0.0951625
SGTC_3251	9135047		0.0371452	0.042648	-0.00837818	-0.0562411	0.00664895	0.0198883	-0.0390282
SGTC_138	0850-0259		0.0371293	-0.00400551	-0.0347979	0.00932325	0.0157421	0.00910285	0.191458
SGTC_2738	aclarubicin	Aclarubicin forms complexes with DNA by intercalation between base pairs, thereby preventing DNA replication. Additionally, doxorubicin inhibits topoisomerase II activity by stabilizing the DNA-topoisomerase II complex, preventing the religation portion of the topoisomerase II reaction.	0.0370957	-0.00975228	-0.0236009	-0.0527636	0.0561808	-0.02075	0.23344
SGTC_3155	9099265		0.0370534	-0.022888	-0.0484083	0.0136758	0.0325865	0.00388175	0.114587
SGTC_1254	0550-0035		0.0369784	-0.00283513	-0.0157569	0.0351095	-0.0334098	-0.00986838	0.0222256
SGTC_2912	7964298		0.0365712	-0.0113469	-0.0425134	0.00226236	0.0527252	0.0157402	0.333254
SGTC_1116	jasmonic acid	Jasmonic acidÂ (JA) is a plant hormone derived from the fatty acidÂ linolenic acid.	0.0365285	-0.023124	0.0285082	0.101623	0.172852	0.0855197	0.0817756
SGTC_201	4262-0159		0.0364911	0.0555055	0.0212904	0.000180555	0.00240244	-0.00392224	0.0746422
SGTC_2077	5212015		0.0364702	-0.0186236	0.00160282	0.0556015	0.0429125	0.0186127	0.0712505
SGTC_383	2324-0395		0.0363847	0.0326738	0.107537	0.0129089	0.00354731	0.0108669	0.03857
SGTC_286	k060-0067		0.0363759	-0.00675527	-0.000183391	-0.0244503	0.0160278	0.0540749	0.412753
SGTC_2343	7990716		0.036301	-0.0315557	0.0507148	0.0848694	-0.00888327	0.0519244	0.0704555
SGTC_3305	9127027		0.036178	0.0345817	-0.001136	0.129018	0.0159868	0.0461321	-0.0325448
SGTC_1596	piperlongumine	Piperlongumine selectively kills cancer cells without harming normal cells. It binds to and inhibits proteins known to regulate oxidative stress, in particular, Glutathione S-transferase pi 1 (GSTP1), increasing the level of reactive oxygen species (ROS) and apoptotic cell death in cancer cells.	0.0361402	-0.0212324	-0.0193647	0.0512392	-0.00620235	0.100576	0.00946032
SGTC_2563	tomatine	Tomatine is a toxic glycoalkaloid found in the stems and leaves of tomato plants with fungicidal properties.	0.036121	0.0272328	0.0284698	0.0233851	-0.0614836	0.0253629	-0.00521088
SGTC_960	1222-0186		0.036106	0.0678039	0.0686616	-0.0394269	-0.0106618	0.00222167	0.0318214
SGTC_552	k242-0005		0.0360872	-0.0394214	-0.00231121	-0.0494294	0.150304	0.0362298	0.0766138
SGTC_1809	st050081		0.0360838	-0.0108557	-0.00417844	0.0578675	-0.000505344	0.0185482	0.0731486
SGTC_695	3505-6186		0.0360224	0.0252798	0.0905186	0.0380968	0.0217867	0.0681821	0.108744
SGTC_2575	plumbagin	Like menadione, plumbagin is a naphthoquinone, and undergoes one electron reduction to semiquinone. Under aerobic conditions the semiquinone radical participates in redox cylcing to generate reactive oxygen species (ROS) such as superoxide and hydrogen peroxide.	0.0360089	-0.0164616	-0.0124012	-0.0104254	0.0297556	0.0109361	0.342059
SGTC_942	3253-1115		0.0359304	-0.0252948	0.027719	0.0918357	0.0753297	0.0286874	0.0759992
SGTC_2126	5251174		0.0355855	-0.0221764	-0.0579964	0.0275647	-0.0111305	0.123491	0.0208582
SGTC_1140	3229-1848		0.035582	0.058661	-0.0262843	-0.0293187	0.0697836	0.0502919	0.051075
SGTC_3016	9080866		0.0355763	0.124969	0.0181925	-0.0508617	0.0718901	0.129409	0.0837337
SGTC_3135	9127742		0.0355643	-0.0234756	0.146043	-0.00325302	0.18912	0.0380375	0.153283
SGTC_1663	st014140		0.0354555	-0.0402751	0.0960849	0.166008	0.0550452	0.0669439	0.131942
SGTC_2282	7944268		0.0354258	-0.0170848	0.0519577	0.0100113	0.0291768	0.0316625	0.0647853
SGTC_3134	9127454		0.0353909	0.149658	0.0605645	-0.075953	0.0272934	0.0872043	0.0791494
SGTC_2112	5488546		0.0353585	-0.0326008	0.000174491	0.09752	0.0753603	0.0558341	0.118015
SGTC_2447	5741742		0.0353037	0.0329561	0.0577609	-0.0420828	0.0284383	0.00282169	0.0443944
SGTC_2093	5331342		0.0351709	0.0591965	-0.0106457	-0.0315263	0.0233815	0.0289801	0.0479872
SGTC_595	3909-8003		0.0351654	0.105397	-0.010858	-0.0418633	0.0219001	0.0370232	0.0411187
SGTC_1956	st077085		0.0351335	0.0125987	-0.0443888	0.133172	0.0556405	-0.00431921	0.0558136
SGTC_3142	9086498		0.03513	-0.0200933	0.032233	0.0409865	-0.0232676	0.00864478	-0.0153036
SGTC_1008	4106-0037		0.0350716	-0.0212548	0.0123065	0.0931865	0.0338583	0.0977502	0.014968
SGTC_1732	st034308		0.0350564	0.0469905	0.0833199	-0.0519183	0.0877389	0.0471691	0.0995997
SGTC_480	am 92016	K+ channel blocker.	0.0349852	-0.00734719	0.0458565	-0.0106683	-0.0311269	0.136541	0.100209
SGTC_429	1112-0049		0.0349159	0.00357074	0.0132302	0.102262	0.0679812	0.0215708	0.0447723
SGTC_86	0417-1630		0.0348969	-0.00376982	0.0090635	-0.0263319	-0.0124495	0.0523994	0.337942
SGTC_2439	5492030		0.0348491	0.0264513	0.0222189	0.0233	0.0760521	0.0921816	0.0212989
SGTC_1704	st028805		0.0347872	0.0662369	0.0400691	-0.0235151	0.100358	0.114841	0.125469
SGTC_982	1491-0518		0.0347842	-0.0198037	-0.0388206	0.039717	0.0122346	-0.0500834	-0.00437136
SGTC_873	0591-4978		0.0347266	-0.0253288	-0.0220147	0.00876379	-0.00576458	-0.00611796	0.0162913
SGTC_1979	st071809		0.0346757	0.0625349	-0.0352223	-0.0206558	0.0276339	-0.000851756	-0.0104608
SGTC_718	1130-0073		0.034674	0.00601953	0.112311	-0.0651899	0.0932513	-0.0111885	0.072833
SGTC_217	ketoconazole	Ketoconazole is an imidazole antifungal; acts by inhibiting lanosterol 14Î±-demethylase preventing the conversion ofÂ lanosterolÂ toÂ ergosterol, an essential component of the fungalÂ cytoplasmic membrane.	0.0346453	-0.0133076	-0.0204701	0.0315425	0.0135576	-0.0254764	0.205861
SGTC_879	0831-1030		0.0346423	0.00754916	-0.0157069	0.0902231	0.0671105	0.00662342	0.255612
SGTC_519	k048-0011		0.0346171	-0.0626944	0.050817	0.0350794	0.138713	0.00825073	0.0733116
SGTC_2082	5219693		0.0345826	-0.00382153	-0.0410587	-0.0203166	-0.0147479	0.0939915	0.139349
SGTC_1039	k821-0043		0.0344063	-0.0223814	-0.00366035	-0.0140368	0.0368517	0.0701876	0.0523106
SGTC_1396	3511-0007		0.0343979	-0.00265958	-0.0057674	0.173963	0.0648969	0.0378726	0.111147
SGTC_825	1988-2224		0.0343374	-0.0124267	-0.043952	-0.0329055	0.0179896	0.00725348	0.465078
SGTC_510	ag-490		0.0343367	-0.00896583	-7.37733e-05	-0.0291027	0.0376355	0.0648287	0.0305666
SGTC_2661	dactinomycin	An Actinomycin D Classic transcription inhibitor.	0.034319	-0.0171072	0.015675	0.0555869	0.0707629	-0.00442562	0.050785
SGTC_2561	acetosyringone	A non-steroidal anti-inflammatory agent and anti-asthmatic agent.	0.0342497	-0.020705	0.00632023	0.0192028	0.0454179	0.00187745	0.217549
SGTC_1120	ficusin	A DNA cross-linker.	0.0341436	-0.0445359	0.0145052	0.0137874	0.0654672	0.0607907	0.0535206
SGTC_2087	5276107		0.03401	-0.00290875	0.0704456	0.0964286	0.0435265	-0.0106066	0.169933
SGTC_78	0336-0123		0.034009	-0.00282944	-0.0321266	-0.0881367	0.0172925	0.113869	0.151115
SGTC_1484	3473-2379		0.0338993	0.0190945	0.0433452	0.137156	0.0364291	0.091275	0.0789923
SGTC_617	3770-0098		0.0338721	0.00298089	-0.00127654	0.0649299	0.090113	0.00181743	0.158195
SGTC_1823	3-hydroxy-2-naphthoic acid		0.0338197	0.0920402	-0.00892905	0.0216551	-0.0129416	-0.00502943	0.00569474
SGTC_1653	st012112		0.0337615	0.021596	0.135608	-0.0205615	0.0836376	-0.020537	0.00903318
SGTC_2010	4012422		0.033732	0.135846	0.0240686	0.0186224	0.0609619	0.0386301	-0.0495462
SGTC_1318	1280-3875		0.0336743	0.0444989	0.077903	-0.0200547	0.0770598	-0.0239636	-0.0822467
SGTC_381	3461-2219		0.0336722	-0.0358472	0.0522964	-0.0036981	0.0534318	0.0232553	0.112597
SGTC_2020	4017018	Used for adrenal and myocardial imaging when labeled with iodine radioisotope.	0.0335791	0.0298443	0.0675489	-0.0202582	0.0361789	0.0550897	0.0873446
SGTC_3157	9099274		0.0335787	0.0412886	-0.0034832	0.0521752	0.0761622	0.0536167	0.0492417
SGTC_1297	1068-0111		0.0335772	0.026118	0.0779853	-0.0163832	-0.0160607	-0.00795792	-0.00146138
SGTC_1200	1643-0193		0.0334108	0.0600892	-0.0507562	-0.00143613	-0.0259495	0.0180362	0.0505297
SGTC_486	niguldipine	A calcium channel blocker.	0.0333967	-0.0223092	-0.0462527	0.0260468	-0.0445077	0.0137753	0.102923
SGTC_1571	st070080		0.0333395	0.024884	0.0163574	0.0473732	-0.00347123	-0.0818859	0.00797804
SGTC_125	0133-0007		0.0332714	-0.0201514	0.0475827	0.0280283	0.0153863	-0.0138482	0.0790449
SGTC_1280	0880-0253		0.0332566	0.0321912	-0.00132127	-0.0175892	0.0666265	-0.00698372	0.00198516
SGTC_1969	st069479		0.0330305	-0.0564112	-0.00884137	-0.0305141	0.0220741	-0.0411499	0.0271589
SGTC_2457	5731572		0.0328886	-0.0295635	0.00216334	0.0522615	0.0483588	0.0394724	0.0212442
SGTC_2107	5363541		0.0328581	-0.0450715	0.034364	-0.0501533	0.0398045	0.0682957	0.0935898
SGTC_3317	9138495		0.0328066	0.0759722	0.00296651	-0.00348166	0.0112355	-0.00202528	0.110203
SGTC_3354	9151612		0.0327848	0.0434477	-0.0310991	-0.00293851	0.0311075	0.0833445	-0.0496254
SGTC_490	phenamil	Irreversibly blocks amiloride-sensitive Na+ channels.	0.0327838	-0.0232703	-0.0218617	0.0438202	0.0683156	0.0904571	-0.0319221
SGTC_1070	indatraline	A monamine transport inhibitor.	0.0327053	-0.0115943	0.0531562	0.0555886	0.111213	0.0756453	0.0111976
SGTC_344	k064-0035		0.0326252	-0.0334509	-0.0219232	-0.0239653	-0.0462772	0.0842433	0.0512756
SGTC_220	paclitaxel	Paclitaxel is a potent anti-neoplastic and anti-mitotic taxane drug, which binds to the N-terminus of Î²-tubulin and stabilizes microtubules arresting the cell cycle at the G2/M phase.	0.0325776	0.148034	0.0317293	0.00644679	0.0242644	0.0385697	-0.0661449
SGTC_3297	9117502		0.0325341	0.0204079	0.0431097	-0.00534863	-0.00933471	-0.0606067	-0.0429524
SGTC_1079	idarubicin	Idarubicin forms complexes with DNA by intercalation between base pairs, thereby preventing DNA replication. Additionally, doxorubicin inhibits topoisomerase II activity by stabilizing the DNA-topoisomerase II complex, preventing the religation portion of the topoisomerase II reaction.	0.0325295	-0.0147322	0.0752796	0.000891649	0.171096	0.0525651	0.313274
SGTC_3167	9103034		0.0325143	0.0525641	0.068794	0.0769935	0.107762	0.0455247	0.181358
SGTC_810	3825-7150		0.0324516	-0.0214004	0.0752063	0.0094613	0.0108351	0.0611052	0.0975307
SGTC_2218	6965428		0.0324046	0.0895717	0.0912948	0.0101439	0.0680268	0.0550421	0.0597843
SGTC_1393	3470-5649		0.0323989	0.0391542	-0.00337881	-0.0458191	-0.0156425	0.122083	0.11288
SGTC_223	busulfan	A DNA alkylator.	0.0323407	-0.0480096	0.101552	-0.0311873	0.054381	0.0432075	0.0238749
SGTC_3344	9148862		0.0322599	0.0418486	-0.0501896	-0.0257956	0.0213745	0.0310504	0.130257
SGTC_3249	9135183		0.032148	0.00168995	-0.0156632	0.0302948	0.00563097	0.01994	0.118163
SGTC_997	3996-0078		0.0321277	0.00792334	0.0304343	-0.0380834	0.0396562	0.12425	0.12899
SGTC_411	enrofloxacin	A bacterial gyrase inhibitor.	0.0320951	-0.0194181	0.177759	0.0229689	0.216787	-0.00340839	0.0726217
SGTC_3209	9113616		0.0320374	0.0191438	-0.0720468	-0.0192304	0.00562583	0.130983	-0.0487464
SGTC_582	0987-0078		0.0320294	-0.00613608	-0.0922378	0.217139	0.126244	0.0212608	0.0585522
SGTC_2938	9059746		0.0320261	0.0524848	-0.0664936	-0.0149334	-0.0287555	0.014771	0.0667904
SGTC_206	4546-0025		0.0319517	-0.0124629	0.0288686	0.031097	0.0264244	-0.023133	0.0955457
SGTC_1434	4073-0095		0.0319308	0.00313253	0.0883939	0.183648	0.0807439	0.0632805	0.157408
SGTC_2416	tofa	TOFA (5-(Tetradecyloxy)-2-furoic acid) is a cell-permeable, potent, reversible, and competitive inhibitor of acetyl-CoA carboxylase (ACC), a key enzyme involved in fatty acid biosynthesis. Inhibits cellular fatty acid synthesis in a dose-dependent manner	0.0318653	0.0111678	-0.0246517	-0.0184003	0.00105382	0.070633	0.00902554
SGTC_560	2332-1943		0.0318634	0.026406	0.06067	0.00999129	0.0806747	0.00871984	0.042066
SGTC_476	mead acid	An omega 9 fatty acid.	0.0318352	0.134948	0.0450179	0.0294615	0.0157236	-0.0040169	0.0088235
SGTC_1631	benzylvanillin		0.0318137	0.00622094	0.036814	0.0468763	0.0559539	-0.00875299	0.0308096
SGTC_1301	naphtanilide LB	An a1-adrenergic receptor antagonist or alpha blocker.	0.0317228	0.0293982	-0.0339682	-0.00375471	0.0579407	0.0263744	0.114013
SGTC_1778	st046819		0.0316334	0.0458043	-0.0462924	-0.0314138	0.0176026	0.113937	0.121991
SGTC_3325	9138760		0.0315632	-0.0224469	0.0522695	0.0114293	0.0254671	-0.0208342	0.0140942
SGTC_1755	st041960		0.0315215	-0.010605	-0.0286604	0.0745382	0.101745	0.0461599	0.169815
SGTC_2461	5755302		0.0313737	0.079923	0.0447136	0.0321767	0.0039882	0.0415328	0.171756
SGTC_2887	9044784		0.0312803	-0.0071828	-0.0712776	0.14419	0.0566735	0.0101067	-0.0158805
SGTC_2382	9035899		0.0312623	-0.0430685	-0.00458301	-0.0320635	0.0496653	0.0181734	0.052758
SGTC_2401	5128683		0.031217	-0.0193979	-0.044306	0.0188471	0.0351772	0.0727409	0.0738181
SGTC_954	1189-0853		0.0312003	0.00343554	-0.101655	0.0680112	0.0397019	0.0220359	0.0604531
SGTC_1443	4112-3303		0.0311705	0.0636837	0.0477059	0.0270691	0.0787372	0.0202972	-0.0566016
SGTC_94	0334-0113		0.0311357	-0.00593473	0.152173	0.0589051	0.132609	-0.0665622	0.0213598
SGTC_176	1486-1328		0.0310308	0.0568359	0.0024896	-0.012507	0.0550829	0.0235108	0.132968
SGTC_2345	9052315		0.0309692	0.117281	-0.0233763	-0.0313172	-0.00806448	0.0340999	-0.00407858
SGTC_190	3970-0790		0.0308456	0.0457566	0.00873642	0.00321426	0.124497	-0.015697	0.0512013
SGTC_2823	7987624		0.0307882	0.0190626	-0.0415665	0.14406	-0.0162161	-0.055461	0.037066
SGTC_2016	5121758		0.0307762	-0.000693983	0.0713058	-0.0018058	0.0132788	-0.0493127	0.149149
SGTC_1597	7-benzyloxygramine		0.030661	0.0231305	-0.0178679	0.0304407	-0.0182736	-0.0339328	0.0225192
SGTC_3123	9126162		0.0305793	0.0605617	-0.00100506	0.0544035	0.00180645	0.0139657	0.0479809
SGTC_1549	4'-methoxyflavonol		0.0305776	0.0266306	-0.00157425	0.0897842	0.0391825	0.0104694	0.0231252
SGTC_2301	7769476		0.0304796	0.0707019	-0.00618538	-0.0229757	-0.00837106	0.0341129	0.0130696
SGTC_736	0958-0254		0.0304426	-0.00245275	0.0285024	0.0542779	0.00874006	0.0104645	0.105023
SGTC_2139	5578692		0.0304027	0.0478365	0.026733	-0.00570861	0.0836103	-0.0299687	0.0145327
SGTC_1908	st060353		0.0303961	0.0125238	0.0992334	0.0426496	0.0414655	0.0224369	-0.0337892
SGTC_474	dl-dihydrosphingosine	A sphingolipidÂ protein kinase CÂ inhibitor.	0.0303753	0.0811678	0.0427072	-0.0400782	0.00461221	0.0149418	0.094293
SGTC_1403	3909-7815		0.0303024	-0.000412319	-0.0769384	0.0628629	-0.00503525	0.039963	0.0874104
SGTC_892	0929-0076		0.0302719	0.0930509	-0.0350234	-0.019295	0.0361517	-0.0419874	-0.00739727
SGTC_2508	celastrol	Celastrol is a natural product and antioxidant.	0.0302518	0.0764284	0.0619397	0.00802657	0.000455473	0.0442334	0.0911523
SGTC_137	0438-0332		0.030189	-0.00547973	0.0339382	-0.0322703	-0.0233265	0.0163686	0.260544
SGTC_2769	toremifene	A first generation selective estrogen receptor modulator (SERM). Like tamoxifen, it is an estrogen agonist for bone tissue and cholesterol metabolism but is antagonistic on mammary and uterine tissue.	0.0301125	-0.0163855	-0.00731002	-0.0080572	0.0235036	0.0802261	0.175249
SGTC_553	k007-0256		0.0300541	0.0220787	-0.0017705	-0.0155933	-0.0288071	-0.00841334	0.00102795
SGTC_809	3998-0021		0.0299919	0.0431916	-0.0128564	0.126042	0.0536739	-0.0240401	0.0211256
SGTC_76	0433-0009		0.0299518	0.114935	0.0542047	0.181971	0.0199381	0.0654954	0.0511014
SGTC_1921	5740136		0.0299456	0.130038	0.0325692	-0.0201423	0.0259457	0.00273855	-0.00715014
SGTC_742	0kpi-0133		0.0299047	-0.0162499	0.00848162	-0.00363046	0.00544763	0.0367103	0.127255
SGTC_1615	st002656		0.0298354	0.0820544	0.0263019	0.0224635	0.0489712	-0.000942765	-0.0547863
SGTC_1903	st060211		0.0297702	0.0483429	0.0186921	0.092527	-0.016882	0.0659455	0.0841862
SGTC_2526	patulin	Patulin is genotoxic and may be carcinogenic. It is an inhibitor of potassium uptake and an inducer of ion flux across cell membranes, potentially involving Na+-K+ dependent ATPase. It induces intra- and intermolecular protein crosslinking.	0.02975	0.0197903	0.0153672	0.0267975	0.12989	0.0206367	0.0394908
SGTC_2923	7992654		0.0296032	-0.0308693	-0.0724569	0.0700155	0.0186249	0.0100527	0.00552569
SGTC_2991	9074669		0.0295908	0.0181248	0.037968	0.0306615	-0.00356438	-0.00210468	0.0778333
SGTC_2775	cyproheptadine	A selective serotonin reuptake inhibitor.	0.0295069	-0.0385727	-0.0216435	-0.00817321	0.0871145	0.0913447	0.181637
SGTC_526	4469-0568		0.0294142	0.0437437	0.0240307	-0.00438544	-0.0460681	0.00896157	0.0670796
SGTC_537	1334-0398		0.0293338	-0.0153801	0.0834989	0.0973769	0.0626434	0.0903744	0.170841
SGTC_2437	5741531		0.0292858	0.0710264	0.00968422	-0.0231233	-0.0282561	-0.0161474	0.00275676
SGTC_2528	xanthyletin	An natural product with antifungal activity of unknown mechanism.	0.0292674	0.0532515	-0.0489235	0.0466069	-0.00834641	-0.0264143	0.106283
SGTC_2531	methyl deoxycholate		0.0291892	-0.00293098	-0.0986131	0.00989284	0.204792	0.0381292	0.067301
SGTC_3282	9108498		0.0291215	-0.0376689	0.0480292	0.0476278	0.0512444	-0.00726781	0.206489
SGTC_729	4092-0585		0.0290664	0.0781478	-0.0303377	0.0252018	-0.00843363	-0.038482	0.0325557
SGTC_1581	himbacine	An alkaloid muscarinic receptor antagonist.	0.0289194	-0.0193575	0.00830132	0.0377581	0.0700715	0.0346182	0.0756672
SGTC_835	0312-0010		0.0289047	0.00115841	-0.0466688	-0.0106623	-0.0135443	0.0221203	0.0411184
SGTC_649	1123-0311		0.0288985	0.0008249	0.0143896	0.0525568	-0.0617787	-0.0131142	0.0131385
SGTC_291	4130-1278		0.0288755	-0.000525095	-0.00828554	0.0217002	0.025612	-0.0370456	0.0213263
SGTC_16	erodoxin	Erodoxin inhibits Ero1.	0.0288459	0.0166582	0.0280681	-0.0242697	-0.00955189	0.0129496	0.217378
SGTC_710	3448-4187		0.0288436	0.0348997	0.0129289	-0.0193678	0.0935735	0.0777518	0.222829
SGTC_781	4335-2806		0.0287915	0.0902607	0.189789	-0.0676966	-0.0204891	-0.0247925	0.0634466
SGTC_2436	5633522		0.0286987	-0.0233572	-0.029522	-0.0234906	-0.0269554	-0.048609	0.183436
SGTC_629	3448-6466		0.0286115	0.0559149	-0.0301209	0.00858315	0.0766366	0.0617768	0.054396
SGTC_2389	9091542		0.0285693	-0.037442	0.0308494	0.108222	0.0331022	-0.0350503	0.0100318
SGTC_2804	7954240		0.0285459	0.0574462	0.0312583	0.0124801	0.175935	0.0769648	0.0949599
SGTC_1671	st016596		0.028537	0.0847504	0.008617	-0.0179001	0.00236286	0.0678615	0.0878739
SGTC_826	1683-5028		0.0284257	0.118625	0.0113957	-0.0409315	-0.0112628	0.00705582	0.00174386
SGTC_2432	5630864		0.0284196	-0.0219788	0.0175546	0.100469	-0.00762249	0.0245629	-0.0539084
SGTC_207	4185-0010		0.0283941	0.0344463	-0.0266988	0.0111503	-0.0335874	0.0260334	0.147227
SGTC_3315	9136395		0.0283668	0.0245066	0.0268547	0.0272055	0.0664101	0.1016	0.0249155
SGTC_2807	7945238		0.0283237	-0.0413663	0.0858786	0.0360463	-0.026188	-0.0291366	0.0571543
SGTC_703	3875-0075		0.0282419	-0.0581384	0.0658515	-0.0176758	0.0492904	0.0218671	0.0857297
SGTC_165	k038-0023		0.0281707	-0.0192869	0.0182719	-0.0463623	-0.015372	0.00988269	0.354805
SGTC_968	1309-0633		0.028168	0.0467681	-0.0127233	0.113795	-0.0135229	0.0542678	-0.047172
SGTC_175	3793-3120		0.0281547	0.0356287	-0.0243802	-0.00917819	0.090993	0.107918	0.202426
SGTC_3118	9124250		0.0280733	-0.0387907	-0.0737288	-0.0220735	0.0506796	0.0795414	0.0560599
SGTC_267	4-Nitroquinoline-1-oxide (4-NQO)	4-Nitroquinoline 1-oxideÂ (also known as 4-NQO) is aÂ quinolineÂ derivative and aÂ tumorigenicÂ compound. 4-NQO induces DNA lesions that require nucleotide exicision repair.	0.0276853	-0.0157726	0.0692367	0.0259757	0.162452	0.00782913	0.16301
SGTC_3260	9137109		0.0275691	0.0104347	-0.0194992	0.157816	0.0354929	0.0141929	-0.0313892
SGTC_564	3555-0129		0.0275262	-0.0202239	0.0494844	0.0149187	0.0371748	0.0581008	0.0272759
SGTC_1054	3429-0080		0.0275055	-0.0189487	0.0237385	0.0613939	-0.0122356	-0.0733528	0.0273563
SGTC_3341	9147222		0.0274923	-0.00093652	0.0226099	0.0888206	0.00482119	0.0928877	0.0444491
SGTC_2578	7,8-dihydroxyflavone	Intensifies effect of antibiotics on Staphylococcus aureus.	0.0274609	0.000346694	0.00622575	0.138895	0.100652	0.0149394	0.232201
SGTC_1225	1216-0074		0.0274536	0.067301	0.0165395	-0.0146526	-0.0229135	-0.0154974	0.0539428
SGTC_990	3985-0011		0.0273851	0.123262	0.00807288	-0.0499973	-0.00548708	-0.0244633	-0.0438498
SGTC_2727	riluzole	Riluzole is a sodium channel protein inhibitor and potent neuroprotective agent. It has been shown to preferentially block tetrodotoxin-sensitive sodium channels, which are associated with damaged neurons.	0.0273478	0.192661	0.0297468	-0.0131947	0.117988	0.0774949	-0.000341792
SGTC_1626	st003712		0.0273161	0.0643655	0.0529663	-0.0308429	0.0478101	0.108865	0.138395
SGTC_2124	5246320		0.0269047	-0.00162863	-0.0181807	0.0111768	0.0108422	0.0171218	0.0660526
SGTC_3136	9095672		0.0268848	-0.0500188	-0.0589776	0.039513	0.0415994	0.164371	0.149607
SGTC_1645	Cervolide	A fragrance.	0.0268187	0.057403	0.00978574	-0.00978651	-0.0157558	0.152183	0.0262546
SGTC_1370	2001-0092		0.0267788	0.0730231	0.119124	0.0431096	0.0323104	0.0203488	0.0367677
SGTC_2986	9022445		0.0267022	-0.0224907	-0.0234321	0.0950602	-0.0113106	-0.00554912	0.0555123
SGTC_1697	st025554		0.026615	0.0543427	0.00189312	-0.0152061	0.0101032	0.0131531	0.0343085
SGTC_2360	9040895		0.026544	0.0688523	0.0764671	0.0882367	0.0317639	-0.007577	0.120129
SGTC_3005	9076496		0.026417	0.0176839	0.000118452	-0.0039259	0.00450663	-0.00576846	0.0315404
SGTC_514	4466-0038		0.0264097	-0.0259813	-0.0382662	-0.0254636	0.00264485	0.0349084	0.299196
SGTC_3099	9120367		0.0264018	4.28604e-05	-0.0207655	-0.0717841	-0.016565	0.0774012	0.25579
SGTC_1277	0873-0036		0.0263938	-0.0198068	0.00177873	-0.0925646	0.03111	0.118267	0.125357
SGTC_1336	1486-0901		0.0263595	0.0887021	-0.0471441	0.0476724	-0.0232041	0.0200306	0.00101518
SGTC_3350	9150499		0.0263546	-0.0177363	-0.028243	-0.0331617	0.0461989	0.0404445	0.397346
SGTC_3340	9146634		0.0262844	-0.00509026	0.0677481	0.000511118	-0.00281027	-0.00916492	0.00975392
SGTC_1934	st074720		0.0262082	0.0934143	0.0100063	-0.0431811	0.00507176	0.0497353	0.0399007
SGTC_1186	1319-0216		0.026195	0.000835225	-0.00723479	-0.0547025	-0.0292594	0.0994596	0.028657
SGTC_1832	st054113		0.0261343	0.0964984	0.089935	-0.0521017	0.0628408	0.0730293	0.0075321
SGTC_848	0368-0089		0.0261207	-0.00244707	0.0100657	0.0209296	0.00304452	-0.0141932	-0.0259546
SGTC_619	1652-1634		0.0261046	-0.0288337	0.0258166	-0.0391941	0.0336858	0.0831296	0.0254732
SGTC_3103	9120822		0.0260678	0.020446	0.0651596	-0.0132763	-0.0102663	0.0307658	0.0192768
SGTC_1154	4088-0362		0.0260423	-0.0325803	-0.0554021	-0.0150805	0.0352658	0.05553	0.0952109
SGTC_2086	5274770		0.0260221	0.063866	0.0359397	-0.0232342	0.0110772	-0.0325184	-0.0111318
SGTC_3121	9125696		0.0259839	0.0198747	-0.00277985	-0.0151386	0.0625415	0.0559427	-0.0351735
SGTC_638	3970-0837		0.0259784	0.056478	0.0296089	0.0165785	0.00135993	-0.0211711	0.136434
SGTC_1293	1000-1278		0.0259621	0.0378197	0.0313652	0.0514893	0.010899	0.0162199	0.0765291
SGTC_49	0717-0965		0.0259407	-0.0570768	-0.0262081	0.064639	0.0255068	0.134038	0.0523716
SGTC_2496	diffractaic acid	An apoptosis inducer which activates caspases.	0.0259321	0.0237969	0.0477748	0.00370877	0.145315	0.0564437	0.14034
SGTC_805	3852-0218		0.0258936	-0.0271213	0.0380785	0.0221659	0.0764351	-0.0157315	0.0748536
SGTC_2716	st080858		0.0258373	0.0101248	-0.0210533	0.0128633	0.0100049	0.0574792	0.075492
SGTC_1166	k206-0078		0.0257045	0.0903359	0.0515856	0.00975917	0.0565068	-0.00233175	0.0235019
SGTC_2954	9074818		0.0256687	0.0356957	0.0412065	0.0056219	0.0460538	0.0588757	0.0595125
SGTC_1002	4049-0206		0.0256106	0.0627568	0.0174835	0.0724915	0.0159914	-0.0192801	0.141091
SGTC_2317	5986382		0.0255854	-0.0364116	0.0581864	0.0364174	0.0855106	0.0822717	0.0151107
SGTC_1998	st075797		0.0254848	0.115689	-0.0101175	-0.0540468	-0.0156412	0.0351489	0.0483127
SGTC_799	1310-0557		0.025478	0.0556241	0.0787762	-0.0143681	0.103835	0.0430884	-0.0259975
SGTC_950	1165-0508		0.0253798	-0.0251112	-0.0195107	-0.0180535	0.0501252	0.00906854	-0.00625857
SGTC_2962	9082311		0.0253196	0.00764877	-0.0697082	0.00402607	0.0281973	0.0266047	0.0822926
SGTC_2102	5377816		0.0252617	0.097104	-0.00368726	0.0136808	-0.0390334	-0.0268999	-0.0188653
SGTC_2269	7935389		0.0251331	-0.0352095	-0.0468925	-0.0277255	0.0662154	-0.00165896	0.374365
SGTC_3036	9090181		0.0250246	0.0241568	-0.00089212	0.0733767	0.0491659	0.038345	0.10566
SGTC_1648	st011736		0.025014	-0.0111534	-0.0452951	0.111334	0.0198777	0.0270509	0.0852399
SGTC_317	4495-0002		0.0249339	0.0447024	0.156418	0.000896181	0.0626489	0.0515498	0.12637
SGTC_1690	st023502		0.0248225	-0.0260736	0.0179437	0.0618331	0.01433	-0.00998656	0.0143626
SGTC_1007	4101-0031		0.0248098	0.0160836	-0.0119264	0.00676888	0.0346179	-0.0404033	-0.00917812
SGTC_1106	tegaserod maleate	Tegaserod is a 5-HT4 agonist manufactured by Novartis and used for the management of irritable bowel syndrome and constipation.	0.0247813	0.0160659	0.0280893	0.0767032	0.103326	0.0241921	0.0343813
SGTC_2132	5317594		0.0247189	0.0217488	-0.00936789	-0.00485508	0.00436344	0.0491537	0.135008
SGTC_2172	5754775		0.0246352	0.00567951	-0.0265962	-0.0848797	-0.0047276	0.0235903	-0.00316753
SGTC_1828	st055811		0.0246135	0.188865	0.0678614	0.0442423	0.00174517	0.00202027	-0.0388767
SGTC_1654	st012436		0.0246007	0.0549002	0.00713415	-0.00798274	-0.00957364	-0.00104404	-0.00110177
SGTC_167	3672-0051		0.0245894	0.0872024	-0.0113709	-0.0109098	0.0213557	-0.00428423	0.0135677
SGTC_122	0236-0016		0.0245678	0.0746348	-0.0647873	-0.0206158	-0.0802241	0.0206322	-0.0255888
SGTC_2960	9079389		0.0245418	0.0262588	-0.00895897	0.0357492	-0.00602683	0.0277506	-0.043101
SGTC_522	1273-0010		0.024511	0.0907972	-0.0706694	-0.0208111	0.0592867	0.0313987	0.0638105
SGTC_2387	9077560		0.0243392	0.0285341	-0.0016523	-0.0121671	0.0114561	0.0649369	0.367012
SGTC_1127	asiatic acid	A kinase inhibitor; arrests cells at G2/M.	0.0242816	0.0486507	0.116735	0.0400784	0.0992203	-0.00501678	0.0603932
SGTC_35	0133-0054		0.0241943	0.0516649	0.017241	-0.00989566	-0.0322442	0.0375487	-0.0469438
SGTC_501	nsc-95397		0.0241794	0.053361	0.0121764	0.00634243	-0.00832455	0.0043856	0.0374716
SGTC_3329	9141233		0.0241555	0.0103476	-0.0150498	0.0169885	-0.0406527	0.108321	-0.0359395
SGTC_3063	1327-0034		0.0240835	0.0125539	0.00568956	-0.0532531	-0.0217124	0.0477131	0.24431
SGTC_2502	avocadyne acetate		0.0240823	-0.0291627	-0.0127697	-0.0490503	0.0193119	0.0327978	0.0365576
SGTC_434	1-hexadecyl-2-methylglycero-3 PC		0.0240109	0.0870576	-0.020584	-0.0532575	0.00249699	0.000778724	0.0266759
SGTC_1316	1272-0050		0.0239629	-0.0138515	0.045851	-0.0412057	0.0101691	0.205788	0.103639
SGTC_1100	amiodarone	Amiodarone is a non-selective ion channel blocker with broad fungicidal activity. Amiodarone induces an immediate influx of Ca2+Â inSaccharomyces cerevisiae, followed by mitochondrial fragmentation and cell death.	0.0239281	0.0677185	-0.0220236	0.0172177	0.00653326	0.0830478	0.0938182
SGTC_2990	9074105		0.0239092	0.0255376	0.00704067	0.0726589	0.0240408	0.0476129	0.0686774
SGTC_1300	1094-0077		0.0238122	-0.0256907	0.0865221	0.0215391	0.0391351	-0.0908991	0.122777
SGTC_2798	7813637		0.0237611	-0.031957	0.0721995	-0.023431	0.0881615	0.0572731	0.0439043
SGTC_303	1348-1668		0.0236775	0.0103431	0.0397493	-0.00179329	0.0797817	0.00727181	0.067926
SGTC_773	4358-1457		0.0236069	-0.0387406	-0.0345685	0.0242581	-0.0258755	0.0992668	0.0329296
SGTC_2848	9016370		0.0235987	0.0537115	0.0609053	0.0722224	0.00307877	-0.0129147	-0.018811
SGTC_577	r071-0003		0.0235155	0.0277808	0.0386517	0.0503957	-0.0267095	-0.000885283	0.0247927
SGTC_116	0155-0182		0.0234635	0.0798971	-0.00553548	-0.00447532	0.06784	-0.0116019	-0.0473612
SGTC_1338	1486-1223		0.0234524	0.120103	-0.0111272	-0.0406876	-0.0400188	0.00816407	-0.0476453
SGTC_822	1487-0950		0.0233217	0.00272175	-0.0764614	-0.0570616	0.0615156	-0.014171	0.0349306
SGTC_3193	9111931		0.0232531	0.143553	0.0259055	0.06087	0.0981784	0.0569674	0.0502902
SGTC_1384	3089-0840		0.0232479	-0.052809	0.16389	0.0738526	0.0951646	0.0168772	0.0372116
SGTC_3252	9135871		0.023189	0.087644	-0.0731939	0.00144821	-0.0134259	0.0887132	-0.0142105
SGTC_1314	1222-0010		0.0231385	-0.0209327	-0.059209	0.00563259	0.050453	0.0836486	-0.00986297
SGTC_314	1671-0008		0.0231326	0.0490744	-0.00421575	0.0141447	0.0824987	-0.00169946	-0.0382755
SGTC_2682	pyrogallin	An ATP competetive kinase inhibitor.	0.0228433	0.00314919	0.106752	0.00506154	0.0486136	-0.0500486	-0.0657809
SGTC_2363	9053361		0.0227794	-0.0479257	0.0665565	-0.00876053	0.0178432	0.0932892	0.0726017
SGTC_20	0481-0013		0.0226724	-0.0333861	0.0281637	0.0232229	0.0380606	-0.0142744	0.0792098
SGTC_3289	9119912		0.0226395	0.0792123	0.0269554	0.0318365	0.0200491	-0.0187522	-0.0279797
SGTC_410	Î±-linolenic acid	Alpha-linolenic acid (ALA) is aÂ polyunsaturatedÂ nâˆ’3Â (omega-3) fatty acid.Â ALA has been noted to be a reactive oxygen species scavenger that temporarily improves cell proliferation.	0.0225788	0.0720813	-0.00524876	-0.0118495	-0.0671105	0.0125284	-0.0164958
SGTC_578	3460-0051		0.02254	0.246548	-0.0294801	-0.023027	0.0136354	0.0200504	-0.00875102
SGTC_497	capsazepine	A calcium channel blocker.	0.0225101	0.0483028	0.000640547	0.0138298	-0.011011	0.0309264	0.0516903
SGTC_1827	berberine	BerberineÂ is aÂ quaternary ammoniumÂ salt andÂ isoquinolineÂ alkaloid.	0.0224482	-0.00978061	0.0212356	0.000865856	-0.0177129	0.0310544	0.229558
SGTC_2564	betulinic acid	Apoptosis-inducing agent of unknown mechanism.	0.0224181	-0.0218219	-0.0292417	-0.00828852	-0.0107665	0.108564	-0.0200884
SGTC_1077	5-fluorocytosine	The mechanism of 5-fluorocytosine (5-FC) is identical to 5-fluorouracil (5-FU) and acts by inhibiting thymidylate synthetase and through metabolism into cytotoxic ribonucleotides and deoxyribonucleotides that can be incorporated intoÂ DNAÂ andÂ RNA. In addition, the drug has been shown to inhibit the essential ribonuclease activity of the exosome complex. The specificity of 5-FC for fungi is due …	0.0223321	0.0115375	-0.0318852	0.0886287	0.0584889	-0.0337472	0.187348
SGTC_2554	13-methyl-4,4-bisnor-8,11,13-podocarpatrien-3-one		0.0222004	0.0938269	0.010042	-0.0191534	0.0465721	0.0583339	0.105551
SGTC_1361	1608-0041		0.0221278	0.105256	0.00690048	0.070052	-0.00561692	-0.0163801	0.0868234
SGTC_370	0180-0345		0.022127	-0.03312	-0.0818934	0.0514724	0.0626136	0.0775009	-0.0176872
SGTC_2254	7938975		0.0221054	0.0362453	-0.00953573	0.00810554	0.0103325	0.0112767	0.168555
SGTC_2482	5981709		0.0220268	-0.0341467	0.0618182	-0.0432916	0.0729688	-0.022497	0.0446211
SGTC_1125	tnp00248		0.0219623	-0.00152785	0.0246295	0.0927852	-0.0500933	0.0372172	0.00599328
SGTC_365	0121-0052		0.0219406	0.111922	0.0544952	0.00452294	0.0950776	-0.0321666	0.00207419
SGTC_1720	st037298		0.0219018	0.101285	0.012555	-0.0301515	0.0404474	-0.0214277	0.00591692
SGTC_2228	7354201		0.0218919	0.0110866	-0.0201713	-0.0285874	0.0523999	0.0729062	0.204472
SGTC_1510	1123-0200		0.0218676	0.0485693	-0.0128835	-0.00865365	0.0702935	0.0236475	0.0594716
SGTC_646	4092-0839		0.0217941	0.0497364	-0.0262891	-0.00645265	0.0253963	-0.00410637	0.00656622
SGTC_1394	3474-0001		0.0217747	-0.00635216	-0.0199019	0.0774632	0.0751766	-0.00256504	0.0262586
SGTC_2421	5690543		0.0216848	-0.0403103	0.0587352	-0.0354514	0.0608706	0.108489	0.14277
SGTC_782	0083-0095	An indicator and reagent.	0.0216734	0.0337304	-0.0329539	0.156493	0.174544	0.0321168	0.149951
SGTC_276	colchicine	A microtubule depolymerizer.	0.0216332	0.038007	0.025769	0.0664606	0.0641191	0.0206115	0.0726973
SGTC_1818	st052136		0.0215952	-0.0237488	0.0856187	-0.00254817	0.0713113	0.0715523	0.405655
SGTC_652	0437-0092		0.0215604	0.0764862	-0.0605291	0.0843211	0.060872	0.0106513	0.06683
SGTC_575	k072-0246		0.0215476	-0.0372631	-0.0908353	0.134937	0.0525325	0.0325294	0.070745
SGTC_939	1165-0479		0.0214824	0.139646	-0.00836537	-0.0522658	0.0144319	0.0918274	0.0380174
SGTC_353	1988-1175		0.0213481	-0.00590156	-0.0436779	-0.0560746	0.0370826	0.038537	0.0337332
SGTC_1082	camptothecin	Camptothecin is a Topo I (topoisomerase I) inhibitor and antineoplastic.	0.0213479	-0.0287861	0.0605993	-0.00939085	0.160633	0.0179085	0.237113
SGTC_3189	9110682		0.0213087	-0.0351903	0.00511542	-0.0282514	0.0350811	0.0208257	0.184239
SGTC_154	3389-1638		0.0213007	0.171035	0.0516958	0.181668	0.0214593	-0.0482754	0.0254584
SGTC_1256	0570-0116		0.0212916	0.00718332	-0.0819131	0.0644669	0.021977	0.138299	0.168097
SGTC_1680	diphenhydramine	A first generation anti-histamineÂ possessingÂ anticholinergic,Â antitussive, antiemetic andÂ sedative properties.	0.0212847	0.0650937	0.0545045	-0.00670331	0.115169	-0.0516301	0.0299561
SGTC_2101	5377231		0.0212704	0.0304184	-0.100772	-0.00826319	0.0223	0.0584909	-0.0626758
SGTC_1913	st060213		0.0212476	0.0260123	0.0393014	0.0612837	0.0403071	-0.0306159	-0.0335009
SGTC_2194	5927483		0.021142	0.07684	-0.0150993	0.0651884	0.0491469	0.00311104	0.144183
SGTC_3186	9110464		0.0210451	-0.0290986	0.0433837	0.0268225	0.0168755	0.0229899	0.168962
SGTC_528	3492-0019		0.0209427	-0.0158291	0.0286209	0.0278226	0.0426421	0.0231458	0.189685
SGTC_1873	rapamycin	Rapamycin is an potent immunosuppressive and anticancer drug. It forms a complex with FKBP12 that binds to and inhibits the molecular target of rapamycin (mTOR). mTOR is a member of the phosphoinositide kinase-related kinase (PIKK) family that enhances cellular proliferation via the phosphoinositol 3-kinase/Akt signaling pathway. Inhibition of this pathway by rapamycin blocks downstream elements …	0.0209378	-0.0203428	-0.0195528	0.0350185	0.0581943	0.0299983	0.130876
SGTC_1673	st016611		0.0209343	0.0657794	-0.00121768	-0.0328283	-0.0277539	0.00182329	0.0186117
SGTC_1844	rapamycin	Rapamycin is an potent immunosuppressive and anticancer drug. It forms a complex with FKBP12 that binds to and inhibits the molecular target of rapamycin (mTOR). mTOR is a member of the phosphoinositide kinase-related kinase (PIKK) family that enhances cellular proliferation via the phosphoinositol 3-kinase/Akt signaling pathway. Inhibition of this pathway by rapamycin blocks downstream elements …	0.0208815	-0.0123125	0.0275917	0.0320208	0.14442	0.0504357	0.201576
SGTC_3279	9140807		0.0208039	-0.0158232	-0.000776012	0.0278573	0.000914723	0.0813374	0.0402913
SGTC_2034	5197015		0.0207682	0.0719633	0.00404617	-0.024315	0.0338523	0.101624	0.0437867
SGTC_1707	st032323		0.0207485	-0.015746	0.0525955	-0.00147385	0.151882	0.0591835	0.35132
SGTC_59	0330-0160		0.0206945	0.0603007	0.0541255	-0.0166183	0.0291821	-0.00750904	0.00808795
SGTC_1548	st061468		0.0206806	0.11726	0.0568708	-0.0033649	-0.0322244	-0.0270158	-0.0214536
SGTC_834	0312-0008		0.0205003	0.0402951	6.32934e-06	0.0227138	0.0143807	-0.0102041	0.0192596
SGTC_3348	9149464		0.0204975	0.120418	0.049864	0.0339725	0.0161911	-0.0531323	0.0116874
SGTC_1021	4476-0760		0.0204878	-0.00908893	0.0126108	-0.0438845	0.0497839	0.0964547	0.0412281
SGTC_2523	spermine	A DNA binding polyamine.	0.0204808	0.0626359	-0.026571	-0.0322363	-0.0430355	0.0499311	0.00217031
SGTC_1569	carminic acid	Coloring matter from the insect Coccus cacti L. It is used in foods, pharmaceuticals, toiletries, etc., as a dye, and also has use as a microscopic stain and biological marker.	0.0204382	0.0894731	0.0328063	-0.0267315	-0.0412022	0.0397317	0.0386051
SGTC_2152	5568786		0.0204118	0.00750949	0.0786439	-0.00489974	0.118436	0.0725453	0.114884
SGTC_1633	st005664		0.0204113	-0.0179059	-0.0342568	0.0350506	0.0738694	0.131509	0.0750819
SGTC_3004	9076122		0.0204048	0.00702724	0.056866	-0.0137191	-0.0342049	0.0808306	0.0574832
SGTC_1220	1838-0075		0.020393	-0.0115771	-0.0564418	-0.00709406	0.0208063	-0.0465165	0.039553
SGTC_423	5-fluorouracil	5-fluorouracilÂ (5-FU) is a potent FDA-approved antitumor agent. 5-FU is aÂ pyrimidine analogÂ that inhibits thymidylate synthase and is metabolized into cytotoxic ribonucleotides and deoxyribonucleotides that can be incorporated intoÂ DNAÂ andÂ RNA. In addition to being incorporated in DNA and RNA, the drug has been shown to inhibit the essential ribonuclease activity of the exosome complex.	0.0203167	0.0126888	-0.0123433	0.0983525	0.0469238	0.00146198	0.2022
SGTC_1057	3448-5381		0.0203016	0.0899011	-0.028125	0.0425384	0.0355548	-0.0292032	-0.00567058
SGTC_1321	1326-2144		0.0203008	0.0287244	0.0297694	0.112903	0.0597605	0.0119926	0.0167853
SGTC_1632	st005650		0.020259	0.00118196	-0.0824349	0.104992	0.0927127	0.157923	0.0340158
SGTC_36	0335-0881		0.0202027	-0.00254616	0.0304427	-0.0353096	-0.0134274	0.0458147	0.239877
SGTC_2100	5377183		0.0201695	0.0180477	-0.0214631	0.0436484	0.0369616	0.122519	0.0987511
SGTC_639	0833-0042		0.0201279	0.0835239	0.0535748	-0.021969	-0.0220646	0.014048	0.107683
SGTC_3321	9137793		0.020122	-0.021015	-0.0557829	-0.0107872	-0.00125138	0.000101461	0.255247
SGTC_2861	9024595		0.0201154	0.120858	-0.0277845	-0.0271956	0.0585737	0.00117128	0.100327
SGTC_1219	1469-0211		0.0200563	0.0897733	0.0208017	-0.00841482	-0.0228695	0.0148821	-0.0113233
SGTC_2184	6075246		0.0200424	0.00532536	-0.036535	0.0753828	0.004892	-0.0207285	-0.0213233
SGTC_2293	7624732		0.0200214	-0.0232878	0.0223461	0.0928131	0.175318	0.0296297	0.048873
SGTC_2685	mycophenolic acid	Mycophenolic acid is a potent reversible inhibitor of IMPDH (inosine monophosphate dehydrogenase), leading to a depletion of GMP and inhibition of de novoÂ synthesis of purines. The resulting imbalance of nucleotide pools also results in inhibiting transcription-elongation.	0.0199621	0.0232126	-0.000506518	-0.0229142	0.0432015	-0.00108691	0.0538385
SGTC_1271	0832-2808		0.0199473	0.00202481	0.0246236	0.0417572	0.112499	0.102248	0.121369
SGTC_1598	3(2'-chlorophenyl)-7-hydroxy-4-phenylcoumarin		0.0199015	0.00324496	-0.0239652	-0.0307712	0.00772225	0.086434	0.121484
SGTC_131	0141-0277		0.0198786	-0.0319389	0.071856	0.0421416	0.0895744	-0.0428016	0.056307
SGTC_202	3594-0513		0.0198487	0.0200625	0.0679536	0.0460086	0.00228062	0.0840271	0.0693203
SGTC_917	harmaline	HarmalineÂ is aÂ fluorescentÂ psychoactiveÂ indoleÂ alkaloidÂ family; monoamine oxidase (MAOI) inhibitor.	0.0198376	-0.0528621	0.0126543	0.0241693	-0.043421	-0.00605699	0.0707791
SGTC_3137	9097352		0.0197697	0.0436944	-0.028833	0.0358862	0.0167654	-0.0549085	0.000871618
SGTC_1357	1503-1303		0.0197491	-0.0531779	0.0608166	-0.00724578	0.110629	-0.0986901	0.0839808
SGTC_1401	3807-4679		0.0196995	-0.0734065	0.0609862	0.0322877	0.0297898	0.0761772	0.161201
SGTC_406	estrone	A steroid.	0.0195634	-0.018684	-0.0115456	0.106331	-0.00905801	0.106484	0.0252428
SGTC_520	3584-0023		0.019549	0.00925855	-0.0171543	-0.00916585	0.0592998	0.0900713	0.110924
SGTC_905	2-aminofluorene	An established DNA mutagen.	0.0195267	-0.0138265	-0.0668425	-0.00735279	-0.0112132	0.0161199	0.100821
SGTC_1984	st072354		0.0195023	0.128613	0.103565	0.00205776	0.0134974	0.0372526	0.00843495
SGTC_1246	0422-0085		0.0194774	0.0772469	0.123291	-0.0480487	0.101228	0.118491	0.140783
SGTC_3257	9139206		0.0193839	0.0124278	-0.0730332	0.0352729	0.0588246	0.107686	0.0021045
SGTC_2776	terbinafine	Terbinafine inhibits squalene epoxidase, an enzyme in the ergosterol biosynthetic pathway. Because ergosterol is part of the fungal cell membrane terbinafine is thought to change cell membrane permeability, ultimately resulting in fungal cell lysis.	0.0193399	0.0475341	0.107456	0.0109944	-0.0649104	0.014833	0.0819957
SGTC_323	4013-0906		0.0192957	0.0558449	-0.0779607	0.00183254	0.0815072	-0.0275428	-0.0302076
SGTC_2365	9042475		0.0192889	0.0512616	0.0340742	0.0291897	0.0399925	0.0512373	0.114922
SGTC_215	1287-0124		0.0192498	0.00313498	0.00435624	0.234742	0.0260813	-0.0328228	0.188315
SGTC_1955	wogonin	A flavanone.	0.0192242	0.077224	-0.00974454	-0.0145596	-0.0276207	-7.19073e-05	-0.00247159
SGTC_693	4161-2696		0.0191183	0.0137576	0.074022	0.0116009	0.0461061	0.0664841	0.0615846
SGTC_1445	4239-0156		0.0191173	-0.0315207	0.0172354	0.0195641	0.0504481	0.0204197	0.0951638
SGTC_2777	climbazole	Climbazole, an imidazole, is topically used antifungal; inhibits lanosterolÂ 14Î±-demethylase, preventing the conversion ofÂ lanosterolÂ toÂ ergosterol, an essential component of the fungalÂ cytoplasmic membrane.	0.019081	0.0901218	0.0336595	0.0584876	-0.0170958	0.00782447	-0.00548423
SGTC_1249	0481-0015		0.0190733	-0.00381909	0.053898	0.0151435	0.19149	0.0564212	0.0931818
SGTC_1352	1496-0991		0.0190664	0.0456769	0.0254123	0.0233439	-0.0146469	0.0116363	0.0561595
SGTC_1204	4049-0315		0.0190657	-0.0211393	0.0828064	-0.0239884	0.0639528	0.0803689	0.00785225
SGTC_1810	st050138		0.0190515	-0.0129668	-0.00120472	0.0591968	0.0175665	-0.0420735	-0.00647424
SGTC_985	1493-0307		0.0190468	0.0107581	0.0515823	0.0200538	-0.000163617	0.00936451	0.0775915
SGTC_813	k007-0158		0.0190416	0.0714434	0.0765949	0.0215853	-0.0221174	-0.0631626	-0.023246
SGTC_1251	0490-5699		0.0189788	0.0498241	0.0455319	-0.0504504	-0.0445954	0.0177136	0.0341794
SGTC_444	curcumin	A natural phenolic compound. Potent anti-tumor agent having anti-inflammatory and anti-oxidant properties.	0.0189199	-0.0358105	0.0329694	-0.00378726	0.021363	0.00152765	3.02915e-05
SGTC_2975	9084847		0.0187808	0.0757894	-0.0476721	0.0716777	0.0504644	-0.00495585	0.0149235
SGTC_3239	9133757		0.0187793	-0.0177256	-0.07056	0.198043	-0.0131341	-0.0680708	-0.00641502
SGTC_1117	retinoic acid	A transcription inhibitor binds retinoic acid receptor (RAR), which is bound to DNA as a heterodimer with the retinoid X receptor (RXR).	0.0187334	0.129912	0.0529667	-0.0189354	0.0595537	0.000576061	0.0575733
SGTC_2491	paeonol	Increases levels of corticalÂ cytochrome oxidase.	0.0186944	0.121694	0.112029	-0.025214	-0.000297971	0.10403	0.0980065
SGTC_1500	4488-1866		0.0186866	-0.0389171	0.0384821	-0.00417456	-0.00765321	0.0456258	0.0109008
SGTC_3100	9120536		0.0186491	0.0272006	-0.116451	-0.0527248	0.0149107	0.161275	0.120429
SGTC_1874	staurosporine	The main biological activity of staurosporine is theÂ inhibitionÂ ofÂ protein kinases through the prevention of ATP binding to the kinase. Staurosporine is a prototypical ATP-competitive kinase inhibitor in that it binds to many kinases with high affinity, though with little selectivity.	0.0186481	0.0282529	-0.0557371	0.0485091	-0.0204834	-0.0306081	-0.0429952
SGTC_3219	9131112		0.0186008	-0.0161546	0.00950366	-0.00652005	0.0139712	0.0346227	0.0708974
SGTC_3068	9116768		0.018572	0.071326	-0.0467721	-0.00480738	-0.00638922	-0.00237787	-0.00695438
SGTC_2588	indole-3-carbinol	Induces cell cycle arrest.	0.0185298	0.114842	-0.0102133	-0.0326184	0.0302077	0.0599831	0.0250789
SGTC_977	1348-1378		0.018466	-0.015666	-0.0210634	-0.0157512	0.102554	-0.0839816	-0.0309163
SGTC_2518	prenyletin	A coumarin with calcium channel inhibitory activity.	0.0183056	0.156928	0.01121	-0.0555308	-0.0122932	0.0214399	0.0339047
SGTC_2643	anethole	An anti-fungal, anti-helmenthic and channel blocker.	0.018297	0.0377051	-0.0114011	0.0361062	0.0588596	0.0368028	0.0504509
SGTC_1797	st048695		0.0182863	0.046097	-0.00261519	-0.0164415	0.000797459	-0.00726277	0.0350833
SGTC_1842	st055362		0.0182803	0.0311298	-0.00801651	-0.0719986	-0.00967091	0.0473872	0.0446839
SGTC_890	0929-0006		0.0182484	0.077778	0.0159682	-0.0347049	-0.0378183	0.00768571	0.0251674
SGTC_1074	carmofur	Carmofur is a derivative of 5-fluorouracil (5-FU). 5-FU is aÂ pyrimidine analogÂ that inhibits thymidylate synthase and is metabolized into cytotoxic ribonucleotides and deoxyribonucleotides that can be incorporated intoÂ DNAÂ andÂ RNA. In addition to being incorporated in DNA and RNA, the drug has been shown to inhibit the essential ribonuclease activity of the exosome complex.	0.0181992	0.0132246	-0.0254023	0.0793827	0.0741386	0.00345253	0.211552
SGTC_601	0986-0029		0.0181914	0.0939387	0.009071	-0.00929435	0.0635791	0.0170719	-0.0126905
SGTC_1049	3226-0134		0.0181314	-0.00151088	0.000737438	0.0259106	0.157683	0.102931	0.191745
SGTC_2970	9090938		0.018128	0.0945648	-0.0643944	-0.0631293	-0.00736333	0.11936	0.0101976
SGTC_2284	7945075		0.0180879	0.135678	0.0373248	-0.0701384	-0.00165721	-0.0272327	0.020957
SGTC_3213	9129884		0.0180159	0.0310487	-0.0276565	0.0194157	0.0138237	0.00198974	0.0504728
SGTC_1825	st052143		0.0180096	0.0238292	0.0147771	0.0976484	0.0152336	0.00475745	0.0507835
SGTC_1319	1306-0155		0.0179909	0.0514467	0.0273439	0.110126	0.12968	-0.0253852	-0.00938023
SGTC_1939	st074455		0.0179543	0.106717	0.0357336	0.113323	0.033608	-0.0281221	0.0740567
SGTC_3109	9122853		0.0179283	0.0945945	-0.0459797	0.0609059	-0.0193499	0.00401877	0.0519899
SGTC_142	0335-0849		0.0177196	-0.0170114	0.0235298	-0.0372947	-0.0151044	0.0567676	0.306191
SGTC_2114	5491910		0.017715	0.0013251	0.0113367	0.164345	0.0312328	-0.0141267	0.0865737
SGTC_1181	1222-0449		0.0177066	0.135542	0.0270127	-0.00161351	0.0449622	0.0139789	0.0302913
SGTC_3299	9121982		0.0176745	0.0135182	-0.0202211	-0.016805	-0.0285705	0.0137549	0.0117748
SGTC_2873	9040596		0.0176734	-0.0176173	0.043682	0.0431163	0.0937853	0.134111	0.198555
SGTC_1625	st003711		0.0176218	-0.0111329	-0.0184469	0.028982	0.000123217	0.00648896	0.0133819
SGTC_199	4063-0024		0.0175067	0.00341737	0.0503458	-0.0161154	0.0253471	-0.0473033	-0.00154576
SGTC_1566	6,7-dimethoxy-4-ethylcoumarin		0.0175018	0.109743	0.0192037	0.0249566	-0.0212227	-0.0245691	0.0476675
SGTC_1594	piperine	Piperine is an alkaloid from black pepper that shows chemopreventive, cytotoxic, anti-inflammatory, and antioxidant effects. It is suggested that piperine exerts its chemopreventive effect by augmenting antioxidant defense system and modulating lipid peroxidation.	0.017489	0.140668	0.0378889	0.0308058	-0.0105879	0.00273588	-0.0132017
SGTC_2559	tetrahydrosappanone a trimethyl ether	An antioxidant flavonoid	0.0174224	-0.0432993	0.0261339	0.086572	0.0552025	0.0472869	0.0280351
SGTC_2816	7982706		0.0173743	0.0388316	-0.0127948	-0.0106721	-0.042544	-0.0325288	0.0470922
SGTC_3255	9139072		0.0173154	0.0697479	-0.0395105	-0.0258017	-0.0140934	-0.00470222	0.00296726
SGTC_2527	2',3'-dihydroxy-4-methoxy-4'-ethoxybenzophenone		0.0172907	0.064355	-0.00720642	-0.0381245	-0.045254	-0.00999923	-0.00188521
SGTC_2517	totarol	An antibacterial membrane disruptor.	0.0172355	-0.0448974	0.065863	-0.0385293	0.0338434	0.190689	0.270523
SGTC_1209	2323-2347		0.0171945	0.015304	-0.00302224	0.0733045	-0.00187411	0.0455511	0.031566
SGTC_2299	7976368		0.0171914	0.102985	0.0164343	-0.0191092	-0.0214484	-0.00203674	0.0148487
SGTC_596	1155-0152		0.0171695	0.0804975	0.0103694	0.0236487	0.0802776	0.0199657	-0.0110191
SGTC_1766	st045414		0.0169883	-0.0445181	0.0596183	-0.00468854	0.0832719	0.0439384	0.0781937
SGTC_2667	digitoxin	DigitoninÂ is aÂ glycosideÂ obtained fromÂ Digitalis purpurea; theÂ aglyconeÂ isÂ digitogenin, aÂ spirostanÂ steroid. As a detergent, it effectively water-solubilizesÂ lipids. As such, it has severalÂ membrane-related applications inÂ biochemistry, including solubilizingÂ membrane proteins, precipitatingÂ cholesterol, and permeabilizing cell membranes.	0.0169479	0.165315	0.0349106	-0.0186731	-0.00797877	-0.0582902	-0.0274456
SGTC_1599	8-chlro-1-tetrahydronorharmanone		0.0169199	0.0371124	0.0130806	-0.0123518	0.046479	-0.00924766	0.0519222
SGTC_1990	st072050		0.0168855	0.11959	-0.0683453	0.00313292	0.00688605	-0.00860487	0.0217386
SGTC_2853	9015042		0.016839	0.0625328	0.133922	-0.00227511	0.113063	0.133179	0.111381
SGTC_1230	0170-0365		0.0168063	-0.0164044	0.0152167	0.0852729	0.0374467	-0.0206153	0.0848493
SGTC_916	4466-0038		0.0167707	-0.0163933	-0.0157457	-0.020965	-0.0253106	0.0222954	0.19888
SGTC_1553	gossypol	Gossypol is a phenolicÂ aldehydeÂ that permeates cells and acts as anÂ inhibitorÂ for severalÂ dehydrogenaseÂ enzymes.	0.0167415	0.0480617	0.00223731	0.063178	0.0460627	0.0194995	0.0578413
SGTC_1698	5-fluorocytosine	The mechanism of 5-fluorocytosine (5-FC) is identical to 5-fluorouracil (5-FU) and acts by inhibiting thymidylate synthetase and through metabolism into cytotoxic ribonucleotides and deoxyribonucleotides that can be incorporated intoÂ DNAÂ andÂ RNA. In addition, the drug has been shown to inhibit the essential ribonuclease activity of the exosome complex. The specificity of 5-FC for fungi is due …	0.0167197	0.0065462	-0.0174866	0.0667446	0.0279242	-0.00561641	0.168781
SGTC_2939	9044578		0.0166832	0.0461502	-0.0242572	-0.023721	-0.0405503	-0.0227253	0.0456685
SGTC_753	1322-0200		0.0166221	-0.0108147	0.0542266	0.164974	0.0469289	0.0285613	0.0464809
SGTC_1850	st056238		0.0165882	0.0736249	0.0167704	0.0141232	0.0957236	0.0134961	-0.017971
SGTC_3332	9141069		0.016517	0.088508	-0.0551296	0.0741453	-0.0283647	0.0810105	-0.010189
SGTC_475	Î±-linolenic acid	Alpha-linolenic acid (ALA) is aÂ polyunsaturatedÂ nâˆ’3Â (omega-3) fatty acid.Â ALA has been noted to be a reactive oxygen species scavenger that temporarily improves cell proliferation.	0.0164749	0.0242054	-0.0160201	-0.0117051	-0.000118516	-0.00524698	0.132917
SGTC_668	1682-0499		0.0164627	0.114723	0.0534071	-0.04867	0.0226295	0.0059205	-0.0224211
SGTC_28	pentachloropyridine N-oxide	A respiratory chain inhibitor.	0.0164204	0.0459982	-0.00272683	0.0123962	0.0836831	0.006407	-0.0232387
SGTC_2175	5807670		0.0164026	0.0598703	0.00131352	-0.0448835	-0.0356624	0.0116772	-0.000938058
SGTC_2054	5233173		0.0163853	-0.024721	0.00619222	0.0511222	-0.000191907	-0.0283274	0.0690349
SGTC_2888	9058547		0.0162732	0.0651248	0.0303502	0.0235302	0.0367602	0.0128264	0.039517
SGTC_97	0535-0701		0.0161866	0.022371	0.00720521	-0.0117175	0.0867218	0.0660614	0.0131771
SGTC_2420	aureobasidin a	Aureobasidium a is a potent inhibitor of inositol phosphorylceramide (IPC) synthase in fungi.	0.01617	0.0151912	-0.00937586	0.0385818	0.0386606	0.0129199	0.0551944
SGTC_677	0929-0063		0.0160801	0.0579423	0.00825731	-0.0213865	0.0297883	0.00477346	0.022399
SGTC_1476	4112-3294		0.0160302	0.0540458	0.0633408	0.096205	0.0210262	-0.0467503	-0.0025336
SGTC_123	0083-0120		0.0160151	-0.00141565	0.0372033	-0.0332816	0.0742813	-0.0556875	0.060795
SGTC_2453	5731132		0.016009	-0.0334857	0.0246168	0.0191494	0.0317912	-0.0550889	-0.0412439
SGTC_2338	7999974		0.0160072	0.0104767	0.0888463	-0.0393794	0.041041	0.0628843	0.0552647
SGTC_2608	thymoquinone	A benzoquinone with antoxidant properties and demonstrated potential to act as a histone deacetylase inhibitor (HDAC).	0.0159936	0.00264089	0.0968177	-0.0568317	0.124747	0.0745487	0.263113
SGTC_541	4513-1321		0.0159024	0.0687817	-0.0200839	0.0668068	0.110219	0.0136917	0.031161
SGTC_869	0564-0080		0.0158959	0.0885581	0.0256806	0.0119118	-0.0155853	0.0752685	0.098517
SGTC_1933	st074711		0.0158534	0.0876049	0.0183031	0.000526061	-0.0225336	-0.0226759	-0.00203095
SGTC_2418	pentamidine	Thought to act by inhibiting tRNA aminoacylation and translation.	0.0158451	0.00052354	0.0316225	0.114786	0.0374398	-0.0437107	-0.00818308
SGTC_670	4204-0025		0.0158078	-0.0344971	0.0788642	0.00953173	0.0325558	-0.0307522	0.0962829
SGTC_1600	coumarin 106	A hepatotoxic, DNA x-linker.	0.0157302	0.0597921	0.010812	-0.0340238	-0.0276538	0.0166746	0.0248084
SGTC_694	1315-0438		0.015728	-0.0233154	-0.0341622	0.0976725	0.0113359	-0.0405025	-0.0330596
SGTC_2268	7933382		0.0157074	-0.0318281	0.059712	-0.00160844	0.0100666	0.0829106	0.117345
SGTC_1350	1495-0454		0.0156972	0.0924127	0.0215779	0.0112841	0.0342496	0.0218109	-0.0228032
SGTC_224	benfluorex	Inhibits enzymes in fatty acid oxidation, ketogenisis and gluconeogenesis.	0.0156908	0.0367478	-0.0676424	-0.00612997	-0.00106686	-0.0266933	-0.0245809
SGTC_3177	9107506		0.0156619	0.00533798	-0.0175047	-0.0485794	-0.031684	0.0209438	0.0374531
SGTC_2770	toltrazuril	Kills coccidiodes.	0.0156365	0.0895135	0.0915041	0.00334014	0.0307048	0.0431647	-0.0347727
SGTC_2944	9067346		0.0156197	-0.0295192	0.104585	0.0145759	0.100322	0.00491514	0.0287236
[truncated: 1,356 more rows]
