# Supplementary material for: Genes Required for Survival in Microgravity Revealed by Genome-Wide Yeast Deletion Collections Cultured during Spaceflight
Source: Biomed Res Int. 2015 Jan 13;2015:976458. doi: 10.1155/2015/976458 (PMC4309212; doi:10.1155/2015/976458)
Supplement: Supplementary file 1 — Supplementary tables 1 and 2 provide the Illumina sequencing counts for each barcode/strain of each sample following mean normalization for the homozygous strains (Supplementary Table S1) and the heterozygous deletion strains (Supplementary Table S2). Supplementary tables 3 and 4 list those strains in the homozygous deletion collection (Supplementary Table S3) and the heterozygous deletion collection (Supplementary Table S4) that were excluded from the analysis for technical reasons. Supplementary tables 5 and 6 contain the results from the analysis of the homozygous deletion collection, comparing ground experiments to flight experiments in YPD media (Supplementary Table S5) and in YPD media + 0.5M NaCl (Supplementary Table S6). Supplementary table S7 contains the concordance in GO enrichments of the experiments presented in this study to a compendium of published data (reference 13). Supplementary tables 8 and 9 contain the results from the analysis of the heterozygous deletion collection, comparing ground experiments to flight experiments in YPD media (Supplementary Table S8) and in YPD media + 0.5M NaCl (Supplementary Table S9). [file 976458.f1.zip › TableS8_vsT1-het1-dropsToBg.xlsx]

## Sheet: README
Table S8. Genes associated with flight based on fitness defects at different time points, observed for heterozygous deletion strains.
ground and flight sheets
Assessment of whether or not each strain exhibited signficant fitness defects at a later time point, in different conditions (see sheet name).
Column	Description
Strain	a strain in the pool
ORF	the ORF deleted from the strain
Gene	the gene name associated with the deleted ORF
Log2ratio, 21G	log2(<abundance14G>/<abundance21G>) where abundanceYG represents the abundance of the strain at Y generations; larger values indicate a greater reduction in strain abundance at the later time point
P, 21G	significance of the reduction in strain abundance at 21G vs. 14G (see Methods)
Drops out, 21G	yes, if the strain abundance at 14G is above the background level but drops below that level at 21G; no, otherwise (see Methods)
Significant, 21G	yes, if the fitness defect at 21G vs. 14G is significant; specifically, (log2ratio >= 1 & P <= 0.001) or the strain drops out; no, otherwise
flight-ground sheets
Strains that exhibited signfiicant fitness defects at 21 generations in the flight condition but not in the ground condition.
Columns are as described for the ground and flight sheets.
flight-ground processessheets
Gene Ontology (GO) biological processes enriched (P <= 0.01) amongst flight-associated genes at 21 generations (see flight-ground sheets).
Column	Description
GO process	enriched GO biological process
Query set fraction	fraction of the flight genes that are annotated to the process
Process fraction	fraction of the process genes that are associated with flight
Fold enrichment	fold enrichment = <query set fraction>/<fraction of the gene universe annotated to the process>
P	P value measuring the significance of enrichment (hypergeometric test)
FDR	false discovery rate, P corrected for multiple comparisons (see Methods)
Overlap genes	|-separated list of flight-associated genes that are annotated to the process (flight log2ratios are shown in parentheses)

## Sheet: ground
Strain	ORF	Gene	Log2ratio, 21G	P, 21G	Drops out, 21G	Significant, 21G
YAL016W::chr00_12	YAL016W	TPD3	0	0.5	no	no
YAL047C::chr00_12	YAL047C	SPC72	0	0.5	no	no
YAL054C::chr00_12	YAL054C	ACS1	0	0.5	no	no
YAL058C-A::chr00_12	YAL056C-A	YAL056C-A	1.77636e-15	6.22096e-16	no	no
YBL007C::chr2_1	YBL007C	SLA1	0	0.5	no	no
YBL094C::chr2_1	YBL094C	YBL094C	1.77636e-15	6.22096e-16	no	no
YBL098W::chr2_2	YBL098W	BNA4	0	0.5	no	no
YBL105C::chr2_2	YBL105C	PKC1	0	0.5	no	no
YBR001C::chr2_2	YBR001C	NTH2	0	0.5	no	no
YBR019C::chr2_2	YBR019C	GAL10	0	0.5	no	no
YBR036C::chr2_2	YBR036C	CSG2	-0.0916998	1	no	no
YBR067C::chr2_2	YBR067C	TIP1	0	0.5	no	no
YBR075W::chr00_18	YBR074W	YBR074W	0	0.5	no	no
YBR088C::chr00_16a	YBR088C	POL30	0	0.5	no	no
YBR121C::chr00_16a	YBR121C	GRS1	0	0.5	no	no
YBR157C::chr2_3	YBR157C	ICS2	8.88178e-16	3.16712e-05	no	no
YBR158W::chr2_3	YBR158W	AMN1	0	0.5	no	no
YBR168W::chr00_16a	YBR168W	PEX32	-0.148552	1	no	no
YBR191W::chr00_11	YBR191W	RPL21A	1.77636e-15	6.22096e-16	no	no
YBR202W::chr2_4	YBR202W	MCM7	0	0.5	no	no
YBR203W::chr2_4	YBR203W	COS111	1.77636e-15	6.22096e-16	no	no
YBR204C::chr2_4	YBR204C	LDH1	-0.267691	1	no	no
YBR205W::chr2_4	YBR205W	KTR3	0.160597	0	no	no
YBR206W::chr2_4	YBR206W	YBR206W	0	0.5	no	no
YBR207W::chr2_4	YBR207W	FTH1	0	0.5	no	no
YBR208C::chr2_4	YBR208C	DUR1,2	-0.543958	1	no	no
YBR209W::chr2_4	YBR209W	YBR209W	0	0.5	no	no
YBR210W::chr2_4	YBR210W	ERV15	0	0.5	no	no
YBR211C::chr2_4	YBR211C	AME1	0.223635	0	no	no
YBR212W::chr2_4	YBR212W	NGR1	0	0.5	no	no
YBR213W::chr2_4	YBR213W	MET8	0	0.5	no	no
YBR215W::chr2_4	YBR215W	HPC2	-0.11729	1	no	no
YBR217W::chr2_4	YBR217W	ATG12	0	0.5	no	no
YBR218C::chr2_4	YBR218C	PYC2	0	0.5	no	no
YBR219C::chr2_4	YBR219C	YBR219C	0	0.5	no	no
YBR220C::chr2_4	YBR220C	YBR220C	-0.0404271	1	no	no
YBR221C::chr2_4	YBR221C	PDB1	0	0.5	no	no
YBR222C::chr2_4	YBR222C	PCS60	0	0.5	no	no
YBR223C::chr2_4	YBR223C	TDP1	0	0.5	no	no
YBR224W::chr2_4	YBR224W	YBR224W	0.152279	0	no	no
YBR225W::chr2_4	YBR225W	YBR225W	0.0376135	0	no	no
YBR226C::chr2_4	YBR226C	YBR226C	0.0362696	0	no	no
YBR227C::chr2_4	YBR227C	MCX1	0	0.5	no	no
YBR228W::chr2_4	YBR228W	SLX1	0	0.5	no	no
YBR229C::chr2_4	YBR229C	ROT2	0	0.5	no	no
YBR230C::chr2_4	YBR230C	OM14	0	0.5	no	no
YBR231C::chr2_4	YBR231C	SWC5	0	0.5	no	no
YBR232C::chr00_8	YBR232C	YBR232C	-0.432426	1	no	no
YBR233W::chr2_4	YBR233W	PBP2	1.77636e-15	6.22096e-16	no	no
YBR234C::chr2_4	YBR234C	ARC40	0	0.5	no	no
YBR235W::chr2_4	YBR235W	YBR235W	0.13727	0	no	no
YBR236C::chr2_4	YBR236C	ABD1	-0.129051	1	no	no
YBR237W::chr2_4	YBR237W	PRP5	0	0.5	no	no
YBR238C::chr2_4	YBR238C	YBR238C	0.0289197	0	no	no
YBR239C::chr2_4	YBR239C	ERT1	0	0.5	no	no
YBR240C::chr2_4	YBR240C	THI2	0	0.5	no	no
YBR241C::chr2_4	YBR241C	YBR241C	0.0439509	0	no	no
YBR242W::chr2_4	YBR242W	YBR242W	0	0.5	no	no
YBR243C::chr2_4	YBR243C	ALG7	0	0.5	no	no
YBR244W::chr2_4	YBR244W	GPX2	-0.0476231	1	no	no
YBR245C::chr2_4	YBR245C	ISW1	0	0.5	no	no
YBR246W::chr2_4	YBR246W	RRT2	0	0.5	no	no
YBR247C::chr2_4	YBR247C	ENP1	0	0.5	no	no
YBR248C::chr2_4	YBR248C	HIS7	0	0.5	no	no
YBR249C::chr2_4	YBR249C	ARO4	0.0252672	0	no	no
YBR250W::chr2_4	YBR250W	SPO23	0	0.5	no	no
YBR251W::chr2_4	YBR251W	MRPS5	1.77636e-15	6.22096e-16	no	no
YBR252W::chr2_4	YBR252W	DUT1	0	0.5	no	no
YBR253W::chr2_4	YBR253W	SRB6	0	0.5	no	no
YBR254C::chr2_4	YBR254C	TRS20	-0.13777	1	no	no
YBR255W::chr2_4	YBR255W	MTC4	0	0.5	no	no
YBR256C::chr2_4	YBR256C	RIB5	0	0.5	no	no
YBR257W::chr2_4	YBR257W	POP4	0	0.5	no	no
YBR259W::chr2_4	YBR259W	YBR259W	0	0.5	no	no
YBR260C::chr2_4	YBR260C	RGD1	-0.0329397	1	no	no
YBR261C::chr2_4	YBR261C	TAE1	0.470154	0	no	no
YBR263W::chr2_4	YBR263W	SHM1	0	0.5	no	no
YBR264C::chr2_4	YBR264C	YPT10	0.26356	0	no	no
YBR265W::chr2_4	YBR265W	TSC10	0	0.5	no	no
YBR266C::chr2_4	YBR266C	SLM6	-0.0680505	1	no	no
YBR267W::chr2_4	YBR267W	REI1	-0.461394	1	no	no
YBR268W::chr2_4	YBR268W	MRPL37	1.77636e-15	6.22096e-16	no	no
YBR270C::chr00_16a	YBR270C	BIT2	0	0.5	no	no
YBR272C::chr00_16a	YBR272C	HSM3	0	0.5	no	no
YBR276C::chr00_16a	YBR276C	PPS1	0	0.5	no	no
YBR277C::chr00_1	YBR277C	YBR277C	0.31486	0	no	no
YBR278W::chr00_1	YBR278W	DPB3	0	0.5	no	no
YBR284W::chr00_1	YBR284W	YBR284W	0	0.5	no	no
YBR287W::chr00_16a	YBR287W	YBR287W	-0.0896315	1	no	no
YBR288C::chr00_16a	YBR288C	APM3	0	0.5	no	no
YBR294W::chr00_16a	YBR294W	SUL1	0	0.5	no	no
YBR297W::chr00_1	YBR297W	MAL33	0	0.5	no	no
YBR298C::chr00_1	YBR298C	MAL31	0	0.5	no	no
YBR301W::chr00_16a	YBR301W	PAU24	1.77636e-15	6.22096e-16	no	no
YCL001W::chr3_1	YCL001W	RER1	-0.0857462	1	no	no
YCL001W-A::chr00_1	YCL001W-A	YCL001W-A	-0.00296084	1	no	no
YCL002C::chr3_1	YCL002C	YCL002C	-0.0466335	1	no	no
YCL003W::chr3_1	YCL004W	PGS1	-0.00448153	1	no	no
YCL004W::chr3_1	YCL004W	PGS1	0	0.5	no	no
YCL005W::chr3_1	YCL005W	LDB16	0	0.5	no	no
YCL006C::chr3_1/chr00_12	deleted	YCL006C	0	0.5	no	no
YCL007C::chr3_1	YCL007C	YCL007C	0	0.5	no	no
YCL008C::chr3_1	YCL008C	STP22	0.0696948	0	no	no
YCL010C::chr3_1	YCL010C	SGF29	0	0.5	no	no
YCL012W::chr3_1	YCL014W	BUD3	0	0.5	no	no
YCL013W::chr3_1	deleted	YCL013W	0	0.5	no	no
YCL014W::chr3_1	YCL014W	BUD3	0.0537602	0	no	no
YCL016C::chr3_1	YCL016C	DCC1	0	0.5	no	no
YCL017C::chr3_1	YCL017C	NFS1	0	0.5	no	no
YCL023C::chr3_1/chr00_12	YCL023C	YCL023C	1.77636e-15	6.22096e-16	no	no
YCL024W::chr3_1	YCL024W	KCC4	0	0.5	no	no
YCL026C::chr3_1	deleted	YCL026C	0.347362	0	no	no
YCL026C-A::chr00_16a	YCL026C-A	FRM2	-0.148678	1	no	no
YCL027W::chr3_1	YCL027W	FUS1	0	0.5	no	no
YCL028W::chr3_1	YCL028W	RNQ1	0	0.5	no	no
YCL029C::chr3_1	YCL029C	BIK1	0	0.5	no	no
YCL030C::chr3_1	YCL030C	HIS4	0	0.5	no	no
YCL032W::chr3_1	YCL032W	STE50	1.77636e-15	6.22096e-16	no	no
YCL033C::chr3_1	YCL033C	MXR2	0	0.5	no	no
YCL034W::chr3_1	YCL034W	LSB5	0.113365	0	no	no
YCL036W::chr3_1	YCL036W	GFD2	-0.409618	1	no	no
YCL037C::chr3_1	YCL037C	SRO9	0	0.5	no	no
YCL039W::chr3_1	YCL039W	GID7	0	0.5	no	no
YCL040W::chr3_1	YCL040W	GLK1	0	0.5	no	no
YCL041C::chr3_1	YCL041C	YCL041C	-0.0689235	1	no	no
YCL042W::chr3_1	YCL042W	YCL042W	-0.261735	1	no	no
YCL043C::chr3_1	YCL043C	PDI1	0	0.5	no	no
YCL044C::chr3_1	YCL044C	MGR1	0	0.5	no	no
YCL045C::chr3_1	YCL045C	EMC1	0	0.5	no	no
YCL047C::chr3_1	YCL047C	POF1	0	0.5	no	no
YCL048W::chr3_1	YCL048W	SPS22	0	0.5	no	no
YCL049C::chr3_1	YCL049C	YCL049C	-0.0394963	1	no	no
YCL050C::chr3_1	YCL050C	APA1	0.217131	0	no	no
YCL051W::chr3_1	YCL051W	LRE1	0.0395203	0	no	no
YCL053C::chr3_1	deleted	YCL053C	0.140072	0	no	no
YCL054W::chr3_1	YCL054W	SPB1	1.77636e-15	6.22096e-16	no	no
YCL055W::chr3_1	YCL055W	KAR4	0.0822995	0	no	no
YCL056C::chr3_1	YCL056C	PEX34	-0.0285456	1	no	no
YCL057W::chr3_1	YCL057W	PRD1	-0.204836	1	no	no
YCL058C::chr00_12	YCL058C	FYV5	-0.0789628	1	no	no
YCL059C::chr3_1	YCL059C	KRR1	-0.0348739	1	no	no
YCL060C::chr3_1	YCL061C	MRC1	-0.0279071	1	no	no
YCL061C::chr3_1	YCL061C	MRC1	0	0.5	no	no
YCL062W::chr3_1	YCL063W	VAC17	-0.0895762	1	no	no
YCL063W::chr3_1	YCL063W	VAC17	0.0795163	0	no	no
YCL064C::chr3_1	YCL064C	CHA1	0	0.5	no	no
YCL069W::chr3_1	YCL069W	VBA3	0	0.5	no	no
YCL075W::chr00_12	YCL075W	YCL075W	0	0.5	no	no
YCL076W::chr00_12	YCL076W	YCL076W	0.0395301	0	no	no
YCR002C::chr3_1	YCR002C	CDC10	-0.0906111	1	no	no
YCR004C::chr3_1	YCR004C	YCP4	1.77636e-15	6.22096e-16	no	no
YCR005C::chr3_1	YCR005C	CIT2	0.111685	0	no	no
YCR006C::chr3_1	YCR006C	YCR006C	0.283992	0	no	no
YCR007C::chr3_1	YCR007C	YCR007C	0	0.5	no	no
YCR008W::chr3_1	YCR008W	SAT4	0	0.5	no	no
YCR009C::chr3_1	YCR009C	RVS161	0	0.5	no	no
YCR010C::chr3_1	YCR010C	ADY2	0	0.5	no	no
YCR011C::chr3_1	YCR011C	ADP1	-0.0987759	1	no	no
YCR012W::chr00_11	YCR012W	PGK1	-0.15655	1	no	no
YCR012W::chr3_1	YCR012W	PGK1	0	0.5	no	no
YCR014C::chr3_1	YCR014C	POL4	-0.238289	1	no	no
YCR015C::chr3_1	YCR015C	YCR015C	0	0.5	no	no
YCR016W::chr3_1	YCR016W	YCR016W	0	0.5	no	no
YCR017C::chr3_1	YCR017C	CWH43	0	0.5	no	no
YCR019W::chr3_1	YCR019W	MAK32	-0.55584	1	no	no
YCR020C::chr3_1	YCR020C	PET18	0	0.5	no	no
YCR020C-A::chr3_1	YCR020C-A	MAK31	0	0.5	no	no
YCR020W-B::chr00_1	YCR020W-B	HTL1	1.77636e-15	6.22096e-16	no	no
YCR021C::chr3_1	YCR021C	HSP30	0	0.5	no	no
YCR022C::chr3_1	YCR022C	YCR022C	0.231162	0	no	no
YCR023C::chr3_1	YCR023C	YCR023C	0	0.5	no	no
YCR026C::chr00_1	YCR026C	NPP1	0	0.5	no	no
YCR028C::chr00_1	YCR028C	FEN2	0.719655	0	no	no
YCR028C-A::chr00_16a	YCR028C-A	RIM1	0	0.5	no	no
YCR030C::chr00_16a	YCR030C	SYP1	0	0.5	no	no
YCR031C::chr00_1	YCR031C	RPS14A	0	0.5	no	no
YCR032W::chr00_16a	YCR032W	BPH1	0	0.5	no	no
YCR034W::chr00_1	YCR034W	FEN1	0	0.5	no	no
YCR044C::chr00_1	YCR044C	PER1	0.412345	0	no	no
YCR048W::chr00_16a	YCR048W	ARE1	0	0.5	no	no
YCR049C::chr00_1	YCR049C	YCR049C	0	0.5	no	no
YCR050C::chr00_1	YCR050C	YCR050C	-0.118574	1	no	no
YCR051W::chr00_1	YCR051W	YCR051W	0.00268844	0	no	no
YCR052W::chr00_1	YCR052W	RSC6	0	0.5	no	no
YCR060W::chr00_16a	YCR060W	TAH1	-0.00864877	1	no	no
YCR062W::chr00_16a	YCR061W	YCR061W	0	0.5	no	no
YCR072C::chr00_16a	YCR072C	RSA4	1.77636e-15	6.22096e-16	no	no
YCR073C::chr00_16a	YCR073C	SSK22	-0.360564	1	no	no
YCR077C::chr00_1	YCR077C	PAT1	0.379352	0	no	no
YCR079W::chr00_1	YCR079W	PTC6	0	0.5	no	no
YCR081W::chr00_1	YCR081W	SRB8	1.77636e-15	6.22096e-16	no	no
YCR083W::chr00_16a	YCR083W	TRX3	0	0.5	no	no
YCR084C::chr00_16a	YCR084C	TUP1	0	0.5	no	no
YCR086W::chr00_1	YCR086W	CSM1	-0.506143	1	no	no
YCR087C-A::chr00_1	YCR087C-A	YCR087C-A	-0.0216478	1	no	no
YCR088W::chr00_16a	YCR088W	ABP1	0	0.5	no	no
YCR089W::chr00_16a	YCR089W	FIG2	0	0.5	no	no
YCR092C::chr00_2	YCR092C	MSH3	-0.792534	1	no	no
YCR094W::chr00_2	YCR094W	CDC50	-0.163935	1	no	no
YCR100C::chr00_2	YCR100C	YCR100C	0	0.5	no	no
YCR102W-A::chr00_14	YCR102W-A	YCR102W-A	0	0.5	no	no
YCR107W::chr00_17a	YCR107W	AAD3	0	0.5	no	no
YDL002C::chr4_1	YDL002C	NHP10	0	0.5	no	no
YDL003W::chr4_1	YDL003W	MCD1	0	0.5	no	no
YDL004W::chr4_1	YDL004W	ATP16	0.0641159	0	no	no
YDL005C::chr4_1	YDL005C	MED2	0	0.5	no	no
YDL006W::chr4_1	YDL006W	PTC1	-0.136198	1	no	no
YDL007W::chr4_1	YDL007W	RPT2	0	0.5	no	no
YDL008W::chr4_1	YDL008W	APC11	0	0.5	no	no
YDL009C::chr4_1	YDL009C	YDL009C	-0.28419	1	no	no
YDL010W::chr4_1	YDL010W	GRX6	1.77636e-15	6.22096e-16	no	no
YDL011C::chr4_1	YDL011C	YDL011C	0	0.5	no	no
YDL012C::chr4_1	YDL012C	YDL012C	0.18833	0	no	no
YDL013W::chr4_1	YDL013W	SLX5	0	0.5	no	no
YDL014W::chr4_1	YDL014W	NOP1	0	0.5	no	no
YDL015C::chr4_1	YDL015C	TSC13	0	0.5	no	no
YDL016C::chr4_1	YDL016C	YDL016C	0	0.5	no	no
YDL017W::chr4_1	YDL017W	CDC7	1.77636e-15	6.22096e-16	no	no
YDL018C::chr4_1	YDL018C	ERP3	0	0.5	no	no
YDL019C::chr4_1	YDL019C	OSH2	0	0.5	no	no
YDL020C::chr4_1	YDL020C	RPN4	1.77636e-15	6.22096e-16	no	no
YDL021W::chr4_1	YDL021W	GPM2	0	0.5	no	no
YDL022W::chr4_1	YDL022W	GPD1	0.281084	0	no	no
YDL023C::chr4_1	YDL023C	YDL023C	-0.0837867	1	no	no
YDL026W::chr4_1	YDL026W	YDL026W	0	0.5	no	no
YDL027C::chr4_1	YDL027C	YDL027C	0.0328381	0	no	no
YDL028C::chr4_1	YDL028C	MPS1	0	0.5	no	no
YDL029W::chr4_1	YDL029W	ARP2	1.77636e-15	6.22096e-16	no	no
YDL030W::chr4_1	YDL030W	PRP9	0	0.5	no	no
YDL031W::chr00_17a	YDL031W	DBP10	-0.0975343	1	no	no
YDL033C::chr4_1	YDL033C	SLM3	-0.124461	1	no	no
YDL034W::chr4_1	YDL034W	YDL034W	0	0.5	no	no
YDL035C::chr4_1	YDL035C	GPR1	0.132238	0	no	no
YDL036C::chr4_1	YDL036C	PUS9	0	0.5	no	no
YDL037C::chr4_1	YDL037C	BSC1	0	0.5	no	no
YDL038C::chr4_1	YDL039C	PRM7	0.144132	0	no	no
YDL039C::chr4_1	YDL039C	PRM7	0.0746214	0	no	no
YDL041W::chr4_1	YDL041W	YDL041W	0	0.5	no	no
YDL043C::chr4_1	YDL043C	PRP11	0	0.5	no	no
YDL045W-A::chr4_1	YDL045W-A	MRP10	-0.281207	1	no	no
YDL046W::chr4_1	YDL046W	NPC2	0.15581	0	no	no
YDL047W::chr4_1	YDL047W	SIT4	0	0.5	no	no
YDL048C::chr4_1	YDL048C	STP4	0	0.5	no	no
YDL050C::chr4_1	YDL050C	YDL050C	0	0.5	no	no
YDL051W::chr4_1	YDL051W	LHP1	0	0.5	no	no
YDL052C::chr4_1	YDL052C	SLC1	0	0.5	no	no
YDL053C::chr4_1	YDL053C	PBP4	0	0.5	no	no
YDL055C::chr4_1	YDL055C	PSA1	0	0.5	no	no
YDL056W::chr4_1	YDL056W	MBP1	1.77636e-15	6.22096e-16	no	no
YDL058W::chr00_17a	YDL058W	USO1	-0.0444723	1	no	no
YDL059C::chr4_1	YDL059C	RAD59	0	0.5	no	no
YDL060W::chr4_1	YDL060W	TSR1	0	0.5	no	no
YDL061C::chr4_1	YDL061C	RPS29B	0	0.5	no	no
YDL062W::chr4_1	YDL062W	YDL062W	-0.137002	1	no	no
YDL063C::chr4_1	YDL063C	YDL063C	0	0.5	no	no
YDL064W::chr4_1	YDL064W	UBC9	1.77636e-15	6.22096e-16	no	no
YDL065C::chr4_1	YDL065C	PEX19	0	0.5	no	no
YDL066W::chr4_1	YDL066W	IDP1	0	0.5	no	no
YDL067C::chr4_1	YDL067C	COX9	0	0.5	no	no
YDL068W::chr4_1	YDL068W	YDL068W	-0.248732	1	no	no
YDL069C::chr4_1	YDL069C	CBS1	0	0.5	no	no
YDL070W::chr4_1	YDL070W	BDF2	0	0.5	no	no
YDL071C::chr4_1	YDL071C	YDL071C	0	0.5	no	no
YDL072C::chr4_1	YDL072C	YET3	0	0.5	no	no
YDL073W::chr4_1	YDL073W	YDL073W	1.77636e-15	6.22096e-16	no	no
YDL074C::chr4_1	YDL074C	BRE1	0	0.5	no	no
YDL075W::chr4_1	YDL075W	RPL31A	0	0.5	no	no
YDL076C::chr4_1	YDL076C	RXT3	0	0.5	no	no
YDL078C::chr4_1	YDL078C	MDH3	0.0436014	0	no	no
YDL079C::chr4_1	YDL079C	MRK1	-0.204527	1	no	no
YDL080C::chr4_1	YDL080C	THI3	0	0.5	no	no
YDL081C::chr4_1	YDL081C	RPP1A	0	0.5	no	no
YDL082W::chr4_1	YDL082W	RPL13A	0	0.5	no	no
YDL085W::chr4_1	YDL085W	NDE2	0	0.5	no	no
YDL086W::chr4_1	YDL086W	YDL086W	0	0.5	no	no
YDL087C::chr4_1	YDL087C	LUC7	-0.533248	1	no	no
YDL089W::chr4_1	YDL089W	NUR1	0.115741	0	no	no
YDL090C::chr4_1	YDL090C	RAM1	1.77636e-15	6.22096e-16	no	no
YDL091C::chr4_1	YDL091C	UBX3	0	0.5	no	no
YDL093W::chr4_1	YDL093W	PMT5	-0.0461427	1	no	no
YDL095W::chr4_1	YDL095W	PMT1	-0.0234619	1	no	no
YDL096C::chr4_2	YDL096C	OPI6	-0.10224	1	no	no
YDL097C::chr4_2	YDL097C	RPN6	0	0.5	no	no
YDL098C::chr4_2	YDL098C	SNU23	0.0487662	0	no	no
YDL099W::chr4_2	YDL099W	BUG1	0	0.5	no	no
YDL100C::chr4_2	YDL100C	GET3	0	0.5	no	no
YDL101C::chr4_2	YDL101C	DUN1	-0.0706188	1	no	no
YDL102W::chr4_2	YDL102W	POL3	0	0.5	no	no
YDL103C::chr4_2	YDL103C	QRI1	-0.203221	1	no	no
YDL104C::chr4_2	YDL104C	QRI7	0.256824	0	no	no
YDL105W::chr4_2	YDL105W	NSE4	0	0.5	no	no
YDL106C::chr4_2	YDL106C	PHO2	-0.0603127	1	no	no
YDL107W::chr4_2	YDL107W	MSS2	0	0.5	no	no
YDL108W::chr4_2	YDL108W	KIN28	0	0.5	no	no
YDL109C::chr4_2	YDL109C	YDL109C	-0.288559	1	no	no
YDL110C::chr4_2	YDL110C	TMA17	0.358748	0	no	no
YDL111C::chr4_2	YDL111C	RRP42	0.026406	0	no	no
YDL112W::chr4_2	YDL112W	TRM3	0	0.5	no	no
YDL113C::chr4_2	YDL113C	ATG20	-0.0334929	1	no	no
YDL114W::chr4_2	YDL114W	YDL114W	0	0.5	no	no
YDL115C::chr4_2	YDL115C	IWR1	0	0.5	no	no
YDL116W::chr4_2	YDL116W	NUP84	0	0.5	no	no
YDL117W::chr4_2	YDL117W	CYK3	0	0.5	no	no
YDL118W::chr4_2	YDL118W	YDL118W	0	0.5	no	no
YDL119C::chr4_2	YDL119C	YDL119C	0	0.5	no	no
YDL120W::chr4_2	YDL120W	YFH1	0	0.5	no	no
YDL121C::chr4_2	YDL121C	YDL121C	1.77636e-15	6.22096e-16	no	no
YDL122W::chr4_2	YDL122W	UBP1	0	0.5	no	no
YDL123W::chr4_2	YDL123W	SNA4	1.77636e-15	6.22096e-16	no	no
YDL124W::chr4_2	YDL124W	YDL124W	0	0.5	no	no
YDL125C::chr4_2	YDL125C	HNT1	0	0.5	no	no
YDL126C::chr4_2	YDL126C	CDC48	0	0.5	no	no
YDL127W::chr4_2	YDL127W	PCL2	0	0.5	no	no
YDL128W::chr4_2	YDL128W	VCX1	-0.315777	1	no	no
YDL129W::chr4_2	YDL129W	YDL129W	0	0.5	no	no
YDL130W::chr4_2	YDL130W	RPP1B	0.377485	0	no	no
YDL130W-A::chr00_2	YDL130W-A	STF1	-0.596932	1	no	no
YDL131W::chr4_2	YDL131W	LYS21	0	0.5	no	no
YDL132W::chr4_2	YDL132W	CDC53	0.00879831	0	no	no
YDL133W::chr4_2	YDL133W	SRF1	0	0.5	no	no
YDL134C::chr4_2	YDL134C	PPH21	0	0.5	no	no
YDL134C-A::chr4_2	YDL133C-A	RPL41B	0	0.5	no	no
YDL135C::chr4_2	YDL135C	RDI1	1.77636e-15	6.22096e-16	no	no
YDL136W::chr4_2	YDL136W	RPL35B	0	0.5	no	no
YDL137W::chr4_2	YDL137W	ARF2	0	0.5	no	no
YDL138W::chr4_2	YDL138W	RGT2	0	0.5	no	no
YDL139C::chr4_2	YDL139C	SCM3	1.77636e-15	6.22096e-16	no	no
YDL140C::chr4_2	YDL140C	RPO21	0	0.5	no	no
YDL141W::chr4_2	YDL141W	BPL1	0	0.5	no	no
YDL142C::chr4_2	YDL142C	CRD1	0	0.5	no	no
YDL143W::chr4_2	YDL143W	CCT4	0.146117	0	no	no
YDL144C::chr4_2	YDL144C	YDL144C	0	0.5	no	no
YDL146W::chr4_2	YDL146W	LDB17	0	0.5	no	no
YDL147W::chr4_2	YDL147W	RPN5	0	0.5	no	no
YDL148C::chr4_2	YDL148C	NOP14	-0.0555786	1	no	no
YDL149W::chr4_2	YDL149W	ATG9	0	0.5	no	no
YDL150W::chr4_2	YDL150W	RPC53	0	0.5	no	no
YDL151C::chr4_2	YDL151C	BUD30	0.0982355	0	no	no
YDL152W::chr4_2	YDL152W	YDL152W	0	0.5	no	no
YDL153C::chr4_2	YDL153C	SAS10	0.0368848	0	no	no
YDL154W::chr4_2	YDL154W	MSH5	0.037737	0	no	no
YDL155W::chr4_2	YDL155W	CLB3	0.0332453	0	no	no
YDL156W::chr4_2	YDL156W	CMR1	1.77636e-15	6.22096e-16	no	no
YDL157C::chr4_2	YDL157C	YDL157C	0	0.5	no	no
YDL158C::chr4_2	YDL158C	YDL158C	0	0.5	no	no
YDL159W::chr4_2	YDL159W	STE7	0	0.5	no	no
YDL160C::chr4_2	YDL160C	DHH1	0.133786	0	no	no
YDL161W::chr4_2	YDL161W	ENT1	0	0.5	no	no
YDL162C::chr4_2	YDL162C	YDL162C	0.153653	0	no	no
YDL163W::chr4_2	YDL163W	YDL163W	0	0.5	no	no
YDL164C::chr4_2	YDL164C	CDC9	0	0.5	no	no
YDL165W::chr4_2	YDL165W	CDC36	0.0215091	0	no	no
YDL166C::chr4_2	YDL166C	FAP7	0	0.5	no	no
YDL167C::chr4_2	YDL167C	NRP1	0	0.5	no	no
YDL169C::chr4_2	YDL169C	UGX2	0	0.5	no	no
YDL170W::chr4_2	YDL170W	UGA3	0.160055	0	no	no
YDL172C::chr4_2	YDL172C	YDL172C	0	0.5	no	no
YDL173W::chr4_2	YDL173W	PAR32	0.357888	0	no	no
YDL174C::chr4_2	YDL174C	DLD1	0.15493	0	no	no
YDL176W::chr4_2	YDL176W	YDL176W	-0.169173	1	no	no
YDL177C::chr4_2	YDL177C	YDL177C	0	0.5	no	no
YDL178W::chr4_2	YDL178W	DLD2	0.268383	0	no	no
YDL179W::chr4_2	YDL179W	PCL9	0	0.5	no	no
YDL180W::chr4_2	YDL180W	YDL180W	-0.0356133	1	no	no
YDL181W::chr4_2	YDL181W	INH1	1.77636e-15	6.22096e-16	no	no
YDL182W::chr4_2	YDL182W	LYS20	-0.178136	1	no	no
YDL184C::chr4_2	YDL184C	RPL41A	0	0.5	no	no
YDL185W::chr4_2	YDL185W	VMA1	-0.0237396	1	no	no
YDL186W::chr4_2	YDL186W	YDL186W	0	0.5	no	no
YDL187C::chr4_2	YDL187C	YDL187C	-0.109077	1	no	no
YDL190C::chr4_2	YDL190C	UFD2	-0.036892	1	no	no
YDL191W::chr4_3	YDL191W	RPL35A	0.335984	0	no	no
YDL194W::chr00_16b	YDL194W	SNF3	1.77636e-15	6.22096e-16	no	no
YDL195W::chr4_3	YDL195W	SEC31	0	0.5	no	no
YDL196W::chr4_3	YDL196W	YDL196W	0	0.5	no	no
YDL197C::chr4_3	YDL197C	ASF2	-0.111723	1	no	no
YDL200C::chr4_3	YDL200C	MGT1	0	0.5	no	no
YDL201W::chr4_3	YDL201W	TRM8	1.77636e-15	6.22096e-16	no	no
YDL202W::chr4_3	YDL202W	MRPL11	0.115543	0	no	no
YDL203C::chr4_3	YDL203C	ACK1	0	0.5	no	no
YDL204W::chr4_3	YDL204W	RTN2	0.0752571	0	no	no
YDL205C::chr4_3	YDL205C	HEM3	1.77636e-15	6.22096e-16	no	no
YDL206W::chr4_3	YDL206W	YDL206W	0.586518	0	no	no
YDL207W::chr4_3	YDL207W	GLE1	0	0.5	no	no
YDL208W::chr4_3	YDL208W	NHP2	0	0.5	no	no
YDL209C::chr4_3	YDL209C	CWC2	0	0.5	no	no
YDL210W::chr4_3	YDL210W	UGA4	-0.086252	1	no	no
YDL211C::chr4_3	YDL211C	YDL211C	0	0.5	no	no
YDL212W::chr4_3	YDL212W	SHR3	0	0.5	no	no
YDL214C::chr4_3	YDL214C	PRR2	-0.124725	1	no	no
YDL215C::chr4_3	YDL215C	GDH2	0	0.5	no	no
YDL216C::chr4_3	YDL216C	RRI1	-0.0950744	1	no	no
YDL217C::chr4_3	YDL217C	TIM22	0	0.5	no	no
YDL218W::chr4_3	YDL218W	YDL218W	0.0222801	0	no	no
YDL219W::chr4_3	YDL219W	DTD1	-0.0653216	1	no	no
YDL220C::chr4_3	YDL220C	CDC13	-0.449808	1	no	no
YDL221W::chr4_3	YDL221W	YDL221W	0.640724	0	no	no
YDL222C::chr4_3	YDL222C	FMP45	-0.254873	1	no	no
YDL224C::chr4_3	YDL224C	WHI4	0.111444	0	no	no
YDL225W::chr4_3	YDL225W	SHS1	0	0.5	no	no
YDL226C::chr4_3	YDL226C	GCS1	0	0.5	no	no
YDL227C::chr4_3	YDL227C	HO	0	0.5	no	no
YDL229W::chr4_3	YDL229W	SSB1	-0.0234652	1	no	no
YDL231C::chr4_3	YDL231C	BRE4	0.0420543	0	no	no
YDL232W::chr4_3	YDL232W	OST4	0	0.5	no	no
YDL233W::chr4_3	YDL233W	YDL233W	-0.00998734	1	no	no
YDL234C::chr4_3	YDL234C	GYP7	0	0.5	no	no
YDL235C::chr4_3	YDL235C	YPD1	1.77636e-15	6.22096e-16	no	no
YDL236W::chr4_3	YDL236W	PHO13	1.77636e-15	6.22096e-16	no	no
YDL237W::chr4_3	YDL237W	AIM6	0	0.5	no	no
YDL238C::chr4_3	YDL238C	GUD1	-0.299077	1	no	no
YDL239C::chr4_3	YDL239C	ADY3	0	0.5	no	no
YDL240W::chr4_3	YDL240W	LRG1	0	0.5	no	no
YDL242W::chr4_3	YDL242W	YDL242W	0	0.5	no	no
YDR001C::chr4_3	YDR001C	NTH1	0	0.5	no	no
YDR002W::chr4_3	YDR002W	YRB1	0	0.5	no	no
YDR003W::chr4_3	YDR003W	RCR2	0	0.5	no	no
YDR004W::chr4_3	YDR004W	RAD57	0.223828	0	no	no
YDR005C::chr4_3	YDR005C	MAF1	0	0.5	no	no
YDR006C::chr4_3	YDR006C	SOK1	0	0.5	no	no
YDR007W::chr00_16b	YDR007W	TRP1	0	0.5	no	no
YDR008C::chr4_3	YDR008C	YDR008C	1.77636e-15	6.22096e-16	no	no
YDR009W::chr4_3	YDR009W	GAL3	0.00608798	0	no	no
YDR010C::chr4_3	YDR010C	YDR010C	0	0.5	no	no
YDR011W::chr4_3	YDR011W	SNQ2	0	0.5	no	no
YDR013W::chr4_3	YDR013W	PSF1	0	0.5	no	no
YDR014W::chr4_3	YDR014W	RAD61	0	0.5	no	no
YDR015C::chr4_3	YDR015C	YDR015C	0	0.5	no	no
YDR016C::chr4_3	YDR016C	DAD1	0	0.5	no	no
YDR017C::chr4_3	YDR017C	KCS1	0.00073281	0	no	no
YDR018C::chr4_3	YDR018C	YDR018C	0	0.5	no	no
YDR019C::chr4_3	YDR019C	GCV1	-0.152791	1	no	no
YDR020C::chr4_3	YDR020C	DAS2	0.210085	0	no	no
YDR021W::chr4_3	YDR021W	FAL1	0	0.5	no	no
YDR022C::chr4_3	YDR022C	CIS1	1.77636e-15	6.22096e-16	no	no
YDR023W::chr4_3	YDR023W	SES1	0	0.5	no	no
YDR024W::chr4_3	YDR024W	FYV1	0.537781	0	no	no
YDR025W::chr4_3	YDR025W	RPS11A	0	0.5	no	no
YDR026C::chr4_3	YDR026C	NSI1	-0.244446	1	no	no
YDR028C::chr4_3	YDR028C	REG1	-0.232889	1	no	no
YDR029W::chr4_3	YDR029W	YDR029W	1.77636e-15	6.22096e-16	no	no
YDR030C::chr4_3	YDR030C	RAD28	0	0.5	no	no
YDR031W::chr4_3	YDR031W	MIC14	0	0.5	no	no
YDR032C::chr4_3	YDR032C	PST2	0	0.5	no	no
YDR033W::chr4_3	YDR033W	MRH1	0.07661	0	yes	yes
YDR035W::chr4_3	YDR035W	ARO3	0	0.5	no	no
YDR036C::chr4_3	YDR036C	EHD3	-0.0279984	1	no	no
YDR037W::chr4_3	YDR037W	KRS1	0	0.5	no	no
YDR041W::chr00_16b	YDR041W	RSM10	0	0.5	no	no
YDR042C::chr4_3	YDR042C	YDR042C	0.116313	0	no	no
YDR043C::chr4_3	YDR043C	NRG1	-0.0756016	1	no	no
YDR046C::chr4_3	YDR046C	BAP3	-0.0782387	1	no	no
YDR047W::chr4_3	YDR047W	HEM12	-0.0823429	1	no	no
YDR048C::chr00_16b	YDR048C	YDR048C	0.163615	0	no	no
YDR049W::chr4_4	YDR049W	VMS1	-0.0219724	1	no	no
YDR050C::chr00_11	YDR050C	TPI1	0.0932683	0	no	no
YDR050C::chr4_4	YDR050C	TPI1	-0.141668	1	no	no
YDR051C::chr4_4	YDR051C	DET1	-0.21337	1	no	no
YDR052C::chr4_4	YDR052C	DBF4	0.0608708	0	no	no
YDR053W::chr4_4	YDR053W	YDR053W	0	0.5	no	no
YDR054C::chr4_4	YDR054C	CDC34	0	0.5	no	no
YDR056C::chr4_4	YDR056C	YDR056C	0	0.5	no	no
YDR057W::chr4_4	YDR057W	YOS9	0.0576839	0	no	no
YDR059C::chr4_4	YDR059C	UBC5	0	0.5	no	no
YDR060W::chr4_4	YDR060W	MAK21	0	0.5	no	no
YDR061W::chr4_4	YDR061W	YDR061W	-0.0482755	1	no	no
YDR062W::chr4_4	YDR062W	LCB2	0.0845134	0	no	no
YDR063W::chr4_4	YDR063W	AIM7	0	0.5	no	no
YDR064W::chr4_4	YDR064W	RPS13	0.463009	0	no	no
YDR065W::chr4_4	YDR065W	RRG1	0	0.5	no	no
YDR067C::chr4_4	YDR067C	OCA6	0	0.5	no	no
YDR068W::chr4_4	YDR068W	DOS2	0	0.5	no	no
YDR069C::chr4_4	YDR069C	DOA4	1.77636e-15	6.22096e-16	no	no
YDR070C::chr4_4	YDR070C	FMP16	1.77636e-15	6.22096e-16	no	no
YDR072C::chr4_4	YDR072C	IPT1	0	0.5	no	no
YDR073W::chr4_4	YDR073W	SNF11	-0.136479	1	no	no
YDR074W::chr00_11	YDR074W	TPS2	-0.00539471	1	no	no
YDR075W::chr4_4	YDR075W	PPH3	0	0.5	no	no
YDR076W::chr4_4	YDR076W	RAD55	0.0966006	0	no	no
YDR077W::chr4_4	YDR077W	SED1	0.0710754	0	no	no
YDR078C::chr4_4	YDR078C	SHU2	-0.109003	1	no	no
YDR079W::chr4_4	YDR079W	PET100	0.0410767	0	no	no
YDR080W::chr4_4	YDR080W	VPS41	0.100372	0	no	no
YDR081C::chr4_4	YDR081C	PDC2	-0.170014	1	no	no
YDR083W::chr4_4	YDR083W	RRP8	0	0.5	no	no
YDR084C::chr4_4	YDR084C	TVP23	0	0.5	no	no
YDR085C::chr4_4	YDR085C	AFR1	0	0.5	no	no
YDR087C::chr4_4	YDR087C	RRP1	0	0.5	no	no
YDR088C::chr4_4	YDR088C	SLU7	1.77636e-15	6.22096e-16	no	no
YDR091C::chr4_4	YDR091C	RLI1	0.360258	0	no	no
YDR092W::chr4_4	YDR092W	UBC13	-0.286878	1	no	no
YDR093W::chr4_4	YDR093W	DNF2	0	0.5	no	no
YDR094W::chr4_4	YDR094W	YDR094W	0	0.5	no	no
YDR095C::chr4_4	YDR095C	YDR095C	0	0.5	no	no
YDR096W::chr4_4	YDR096W	GIS1	0	0.5	no	no
YDR097C::chr4_4	YDR097C	MSH6	0	0.5	no	no
YDR098C::chr4_4	YDR098C	GRX3	0	0.5	no	no
YDR099W::chr4_4	YDR099W	BMH2	-0.121911	1	no	no
YDR101C::chr4_4	YDR101C	ARX1	0.270816	0	no	no
YDR102C::chr4_4	YDR102C	YDR102C	-0.247894	1	no	no
YDR103W::chr4_4	YDR103W	STE5	-0.282502	1	no	no
YDR105C::chr4_4	YDR105C	TMS1	-0.025987	1	no	no
YDR107C::chr4_4	YDR107C	TMN2	0	0.5	no	no
YDR108W::chr4_4	YDR108W	TRS85	0	0.5	no	no
YDR109C::chr4_4	YDR109C	YDR109C	0	0.5	no	no
YDR110W::chr4_4	YDR110W	FOB1	0	0.5	no	no
YDR112W::chr4_4	YDR112W	IRC2	-0.090537	1	no	no
YDR113C::chr4_4	YDR113C	PDS1	-0.0423935	1	no	no
YDR114C::chr4_4	YDR114C	YDR114C	0	0.5	no	no
YDR115W::chr4_4	YDR115W	YDR115W	0	0.5	no	no
YDR116C::chr4_4	YDR116C	MRPL1	0	0.5	no	no
YDR117C::chr4_4	YDR117C	TMA64	0.182375	0	no	no
YDR118W::chr4_4	YDR118W	APC4	0	0.5	no	no
YDR120C::chr4_4	YDR120C	TRM1	-0.0225266	1	no	no
YDR121W::chr4_4	YDR121W	DPB4	0.0824111	0	no	no
YDR123C::chr4_4	YDR123C	INO2	0	0.5	no	no
YDR124W::chr4_4	YDR124W	YDR124W	0.163901	0	no	no
YDR125C::chr4_4	YDR125C	ECM18	0	0.5	no	no
YDR127W::chr4_4	YDR127W	ARO1	0.0406353	0	no	no
YDR128W::chr4_4	YDR128W	MTC5	1.77636e-15	6.22096e-16	no	no
YDR130C::chr4_4	YDR130C	FIN1	0	0.5	no	no
YDR132C::chr4_4	YDR132C	YDR132C	0	0.5	no	no
YDR133C::chr4_4	YDR133C	YDR133C	0.272584	0	no	no
YDR134C::chr4_4	YDR134C	YDR134C	0	0.5	no	no
YDR135C::chr4_4	YDR135C	YCF1	1.77636e-15	6.22096e-16	no	no
YDR136C::chr4_4	YDR136C	VPS61	0	0.5	no	no
YDR137W::chr4_4	YDR137W	RGP1	0	0.5	no	no
YDR138W::chr4_4	YDR138W	HPR1	1.77636e-15	6.22096e-16	no	no
YDR139C::chr4_4	YDR139C	RUB1	-0.19047	1	no	no
YDR141C::chr4_4	YDR141C	DOP1	0	0.5	no	no
YDR142C::chr4_4	YDR142C	PEX7	0	0.5	no	no
YDR143C::chr4_4	YDR143C	SAN1	-0.143564	1	no	no
YDR146C::chr4_4	YDR146C	SWI5	0.0806546	0	no	no
YDR149C::chr4_5	YDR149C	YDR149C	0	0.5	no	no
YDR150W::chr4_5	YDR150W	NUM1	0	0.5	no	no
YDR152W::chr4_5	YDR152W	GIR2	0	0.5	no	no
YDR158W::chr4_5	YDR158W	HOM2	0	0.5	no	no
YDR163W::chr4_5	YDR163W	CWC15	0	0.5	no	no
YDR168W::chr4_5	YDR168W	CDC37	0	0.5	no	no
YDR169C::chr4_5	YDR169C	STB3	0	0.5	no	no
YDR170C::chr4_5	YDR170C	SEC7	0.111433	0	no	no
YDR174W::chr00_14	YDR174W	HMO1	0	0.5	no	no
YDR178W::chr4_5	YDR178W	SDH4	0	0.5	no	no
YDR196C::chr4_5	YDR196C	CAB5	0	0.5	no	no
YDR198C::chr4_5	YDR198C	RKM2	0	0.5	no	no
YDR202C::chr00_14	YDR202C	RAV2	0	0.5	no	no
YDR216W::chr4_5	YDR216W	ADR1	0	0.5	no	no
YDR222W::chr4_5	YDR222W	YDR222W	0	0.5	no	no
YDR224C::chr4_5	YDR224C	HTB1	0	0.5	no	no
YDR226W::chr4_5	YDR226W	ADK1	0	0.5	no	no
YDR228C::chr4_5	YDR228C	PCF11	7.48851e-06	0	no	no
YDR229W::chr4_5	YDR229W	IVY1	0	0.5	no	no
YDR231C::chr4_5	YDR231C	COX20	0	0.5	no	no
YDR234W::chr4_5	YDR234W	LYS4	0	0.5	no	no
YDR242W::chr00_17a	YDR242W	AMD2	0	0.5	no	no
YDR246W::chr4_6	YDR246W	TRS23	0.205395	0	yes	yes
YDR260C::chr4_6	YDR260C	SWM1	0.286459	0	yes	yes
YDR289C::chr4_6	YDR289C	RTT103	0	0.5	no	no
YDR294C::chr4_6	YDR294C	DPL1	0	0.5	no	no
YDR295C::chr4_6	YDR295C	HDA2	0.00634568	0	no	no
YDR300C::chr4_6	YDR300C	PRO1	0	0.5	no	no
YDR303C::chr4_6	YDR303C	RSC3	0	0.5	no	no
YDR326C::chr00_17a	YDR326C	YSP2	0	0.5	no	no
YDR327W::chr4_6	YDR327W	YDR327W	0	0.5	no	no
YDR334W::chr4_6	YDR334W	SWR1	8.88178e-16	3.16712e-05	no	no
YDR376W::chr4_7	YDR376W	ARH1	0	0.5	no	no
YDR437W::chr4_8	YDR437W	GPI19	0	0.5	no	no
YDR438W::chr4_8	YDR438W	THI74	0	0.5	no	no
YDR439W::chr4_8	YDR439W	LRS4	1.77636e-15	6.22096e-16	no	no
YDR440W::chr4_8	YDR440W	DOT1	0	0.5	no	no
YDR443C::chr4_8	YDR443C	SSN2	0.0986705	0	no	no
YDR446W::chr4_8	YDR446W	ECM11	0	0.5	no	no
YDR447C::chr4_8	YDR447C	RPS17B	0	0.5	no	no
YDR449C::chr4_8	YDR449C	UTP6	0	0.5	no	no
YDR451C::chr4_8	YDR451C	YHP1	0	0.5	no	no
YDR452W::chr4_8	YDR452W	PPN1	0.0433446	0	no	no
YDR453C::chr4_8	YDR453C	TSA2	0	0.5	no	no
YDR454C::chr4_8	YDR454C	GUK1	0	0.5	no	no
YDR455C::chr4_8	YDR455C	YDR455C	0	0.5	no	no
YDR456W::chr4_8	YDR456W	NHX1	-0.112853	1	no	no
YDR457W::chr4_8	YDR457W	TOM1	1.77636e-15	6.22096e-16	no	no
YDR458C::chr4_8	YDR458C	HEH2	-0.126513	1	no	no
YDR459C::chr4_8	YDR459C	PFA5	0.0335432	0	no	no
YDR460W::chr4_8	YDR460W	TFB3	0	0.5	no	no
YDR462W::chr4_8	YDR462W	MRPL28	0	0.5	no	no
YDR463W::chr4_8	YDR463W	STP1	0	0.5	no	no
YDR464W::chr4_8	YDR464W	SPP41	0	0.5	no	no
YDR466W::chr4_8	YDR466W	PKH3	-0.275922	1	no	no
YDR467C::chr4_8	YDR467C	YDR467C	1.77636e-15	6.22096e-16	no	no
YDR468C::chr4_8	YDR468C	TLG1	-0.285743	1	no	no
YDR469W::chr4_8	YDR469W	SDC1	0	0.5	no	no
YDR470C::chr4_8	YDR470C	UGO1	1.77636e-15	6.22096e-16	no	no
YDR471W::chr4_8	YDR471W	RPL27B	0	0.5	no	no
YDR472W::chr4_8	YDR472W	TRS31	0.00221796	0	no	no
YDR473C::chr4_8	YDR473C	PRP3	-0.430978	1	no	no
YDR474C::chr4_8	YDR475C	JIP4	-0.246551	1	no	no
YDR475C::chr4_8	YDR475C	JIP4	0.0570064	0	no	no
YDR476C::chr4_8	YDR476C	YDR476C	0	0.5	no	no
YDR477W::chr4_8	YDR477W	SNF1	-0.0893043	1	no	no
YDR478W::chr4_8	YDR478W	SNM1	1.77636e-15	6.22096e-16	no	no
YDR479C::chr4_8	YDR479C	PEX29	0	0.5	no	no
YDR480W::chr4_8	YDR480W	DIG2	0	0.5	no	no
YDR481C::chr4_8	YDR481C	PHO8	1.77636e-15	6.22096e-16	no	no
YDR482C::chr4_8	YDR482C	CWC21	0	0.5	no	no
YDR483W::chr4_8	YDR483W	KRE2	-0.194869	1	no	no
YDR484W::chr4_8	YDR484W	VPS52	0	0.5	no	no
YDR485C::chr4_8	YDR485C	VPS72	0.0800395	0	no	no
YDR486C::chr4_8	YDR486C	VPS60	0	0.5	no	no
YDR487C::chr4_8	YDR487C	RIB3	0	0.5	no	no
YDR488C::chr4_8	YDR488C	PAC11	-0.198131	1	no	no
YDR489W::chr4_8	YDR489W	SLD5	0	0.5	no	no
YDR491C::chr4_8	YDR491C	YDR491C	0	0.5	no	no
YDR492W::chr4_8	YDR492W	IZH1	0	0.5	no	no
YDR493W::chr00_17a	YDR493W	MZM1	0	0.5	no	no
YDR494W::chr4_8	YDR494W	RSM28	0	0.5	no	no
YDR495C::chr4_8	YDR495C	VPS3	0	0.5	no	no
YDR496C::chr4_8	YDR496C	PUF6	0	0.5	no	no
YDR497C::chr4_8	YDR497C	ITR1	0	0.5	no	no
YDR498C::chr00_17a	YDR498C	SEC20	0	0.5	no	no
YDR500C::chr4_8	YDR500C	RPL37B	0	0.5	no	no
YDR502C::chr00_17a	YDR502C	SAM2	-0.0199307	1	no	no
YDR503C::chr4_8	YDR503C	LPP1	-0.059216	1	no	no
YDR504C::chr4_8	YDR504C	SPG3	0.0516697	0	no	no
YDR505C::chr4_8	YDR505C	PSP1	0	0.5	no	no
YDR506C::chr00_17a	YDR506C	GMC1	0	0.5	no	no
YDR508C::chr4_8	YDR508C	GNP1	0.221809	0	no	no
YDR509W::chr4_8	YDR509W	YDR509W	0	0.5	no	no
YDR510W::chr4_8	YDR510W	SMT3	0	0.5	no	no
YDR511W::chr4_8	YDR511W	ACN9	0	0.5	no	no
YDR512C::chr4_8	YDR512C	EMI1	0	0.5	no	no
YDR513W::chr4_8	YDR513W	GRX2	0.215723	0	no	no
YDR514C::chr4_8	YDR514C	YDR514C	0.267783	0	no	no
YDR515W::chr00_17a	YDR515W	SLF1	1.77636e-15	6.22096e-16	no	no
YDR517W::chr4_8	YDR517W	GRH1	-0.0494646	1	no	no
YDR519W::chr4_8	YDR519W	FPR2	0	0.5	no	no
YDR520C::chr4_8	YDR520C	URC2	1.77636e-15	6.22096e-16	no	no
YDR521W::chr4_8	YDR521W	YDR521W	0	0.5	no	no
YDR522C::chr4_8	YDR522C	SPS2	-0.044317	1	no	no
YDR523C::chr4_8	YDR523C	SPS1	0.141763	0	no	no
YDR524C::chr4_8	YDR524C	AGE1	0	0.5	no	no
YDR525W::chr4_8	YDR525W	API2	0	0.5	no	no
YDR526C::chr00_17a	YDR526C	YDR526C	0.170131	0	no	no
YDR527W::chr4_8	YDR527W	RBA50	-0.0959691	1	no	no
YDR529C::chr4_8	YDR529C	QCR7	0	0.5	no	no
YDR530C::chr4_8	YDR530C	APA2	-0.590584	1	no	no
YDR531W::chr4_8	YDR531W	CAB1	0	0.5	no	no
YDR532C::chr4_8	YDR532C	KRE28	0.18762	0	no	no
YDR533C::chr4_8	YDR533C	HSP31	0	0.5	no	no
YDR534C::chr4_8	YDR534C	FIT1	0	0.5	no	no
YDR536W::chr00_2	YDR536W	STL1	8.88178e-16	3.16712e-05	no	no
YDR538W::chr00_2	YDR538W	PAD1	0	0.5	no	no
YDR539W::chr00_2	YDR539W	FDC1	-0.00288858	1	no	no
YDR540C::chr00_2	YDR540C	IRC4	0	0.5	no	no
YDR541C::chr00_2	YDR541C	YDR541C	-0.260546	1	no	no
YEL001C::chr5_2	YEL001C	IRC22	0	0.5	no	no
YEL004W::chr5_2	YEL004W	YEA4	-0.209591	1	no	no
YEL008W::chr5_2	YEL008W	YEL008W	0	0.5	no	no
YEL009C::chr5_2	YEL009C	GCN4	-0.124999	1	no	no
YEL014C::chr5_2	YEL014C	YEL014C	0.0823699	0	no	no
YEL015W::chr5_2	YEL015W	EDC3	-0.150729	1	no	no
YEL016C::chr5_2	YEL016C	NPP2	-0.162639	1	no	no
YEL017C-A::chr5_2	YEL017C-A	PMP2	0	0.5	no	no
YEL017W::chr5_2	YEL017W	GTT3	0.00686287	0	no	no
YEL018W::chr5_2	YEL018W	EAF5	0.139535	0	no	no
YEL019C::chr5_2	YEL019C	MMS21	0	0.5	no	no
YEL020C::chr5_2	YEL020C	YEL020C	0	0.5	no	no
YEL023C::chr5_2	YEL023C	YEL023C	0	0.5	no	no
YEL024W::chr5_2	YEL024W	RIP1	0	0.5	no	no
YEL025C::chr5_2	YEL025C	YEL025C	-0.0294456	1	no	no
YEL026W::chr5_2	YEL026W	SNU13	0	0.5	no	no
YEL027W::chr5_2	YEL027W	VMA3	0	0.5	no	no
YEL028W::chr5_2	YEL028W	YEL028W	0	0.5	no	no
YEL029C::chr5_2	YEL029C	BUD16	0	0.5	no	no
YEL030W::chr5_2	YEL030W	ECM10	0	0.5	no	no
YEL031W::chr5_2	YEL031W	SPF1	0	0.5	no	no
YEL032W::chr5_2	YEL032W	MCM3	0	0.5	no	no
YEL033W::chr5_2	YEL033W	MTC7	0.0401402	0	no	no
YEL034W::chr00_8	YEL034W	HYP2	0.240127	0	no	no
YEL035C::chr5_2	YEL035C	UTR5	0.174586	0	no	no
YEL037C::chr5_2	YEL037C	RAD23	0.00951437	0	no	no
YEL040W::chr5_2	YEL040W	UTR2	8.88178e-16	3.16712e-05	no	no
YEL043W::chr5_2	YEL043W	YEL043W	1.77636e-15	6.22096e-16	no	no
YEL045C::chr5_2	YEL045C	YEL045C	-0.0522199	1	no	no
YEL046C::chr5_2	YEL046C	GLY1	0.181137	0	no	no
YEL047C::chr5_2	YEL047C	YEL047C	0	0.5	no	no
YEL049W::chr5_2	YEL049W	PAU2	0	0.5	no	no
YEL050C::chr5_2	YEL050C	RML2	0.0395203	0	no	no
YEL051W::chr5_2	YEL051W	VMA8	0.0343772	0	no	no
YEL052W::chr5_2	YEL052W	AFG1	0.314993	0	no	no
YEL053C::chr5_2	YEL053C	MAK10	1.77636e-15	6.22096e-16	no	no
YEL054C::chr5_2	YEL054C	RPL12A	0	0.5	no	no
YEL055C::chr5_2	YEL055C	POL5	8.88178e-16	3.16712e-05	no	no
YEL058W::chr5_2	YEL058W	PCM1	0	0.5	no	no
YEL059W::chr5_2	YEL059W	HHY1	1.77636e-15	6.22096e-16	no	no
YEL063C::chr5_2	YEL063C	CAN1	0	0.5	no	no
YEL064C::chr5_2	YEL064C	AVT2	0	0.5	no	no
YEL065W::chr5_2	YEL065W	SIT1	0.0201384	0	no	no
YEL066W::chr5_2	YEL066W	HPA3	0	0.5	no	no
YEL067C::chr5_2	YEL067C	YEL067C	1.77636e-15	6.22096e-16	no	no
YEL068C::chr5_2	YEL068C	YEL068C	0	0.5	no	no
YEL071W::chr5_2	YEL071W	DLD3	0	0.5	no	no
YEL072W::chr5_2	YEL072W	RMD6	0	0.5	no	no
YER001W::chr5_2	YER001W	MNN1	1.77636e-15	6.22096e-16	no	no
YER003C::chr5_2	YER003C	PMI40	0	0.5	no	no
YER005W::chr5_2	YER005W	YND1	0.0629438	0	no	no
YER006W::chr5_2	YER006W	NUG1	0.0777335	0	no	no
YER007C-A::chr5_2	YER007C-A	TMA20	-0.144006	1	no	no
YER010C::chr5_2	YER010C	YER010C	-0.219843	1	no	no
YER013W::chr5_2	YER013W	PRP22	0	0.5	no	no
YER014W::chr5_2	YER014W	HEM14	-0.491607	1	no	no
YER019C-A::chr5_3	YER019C-A	SBH2	0	0.5	no	no
YER019W::chr5_3	YER019W	ISC1	8.88178e-16	3.16712e-05	no	no
YER020W::chr5_3	YER020W	GPA2	0.245729	0	no	no
YER021W::chr5_3	YER021W	RPN3	0.175396	0	no	no
YER022W::chr5_3	YER022W	SRB4	0	0.5	no	no
YER023W::chr5_3	YER023W	PRO3	0	0.5	no	no
YER024W::chr5_3	YER024W	YAT2	-0.0333255	1	no	no
YER025W::chr5_3	YER025W	GCD11	0.0476486	0	yes	yes
YER027C::chr00_11	YER027C	GAL83	0	0.5	no	no
YER027C::chr5_3	YER027C	GAL83	0	0.5	no	no
YER028C::chr5_3	YER028C	MIG3	0	0.5	no	no
YER031C::chr00_10	YER031C	YPT31	0	0.5	no	no
YER034W::chr5_3	YER034W	YER034W	0	0.5	no	no
YER035W::chr5_3	YER035W	EDC2	0	0.5	no	no
YER036C::chr5_3	YER036C	ARB1	0	0.5	no	no
YER037W::chr00_11	YER037W	PHM8	0	0.5	no	no
YER037W::chr5_3	YER037W	PHM8	0	0.5	no	no
YER038C::chr5_3	YER038C	KRE29	0.33137	0	yes	yes
YER038W-A::chr5_3	YER038W-A	YER038W-A	0.196918	0	no	no
YER042W::chr5_3	YER042W	MXR1	0	0.5	no	no
YER044C-A::chr5_3	YER044C-A	MEI4	0	0.5	no	no
YER047C::chr5_3	YER047C	SAP1	0	0.5	no	no
YER048C::chr5_3	YER048C	CAJ1	0	0.5	no	no
YER049W::chr5_3	YER049W	TPA1	0	0.5	no	no
YER051W::chr5_3	YER051W	JHD1	0	0.5	no	no
YER052C::chr5_3	YER052C	HOM3	0	0.5	no	no
YER056C::chr5_3	YER056C	FCY2	0.118727	0	no	no
YER056C-A::chr5_3	YER056C-A	RPL34A	0	0.5	no	no
YER057C::chr5_3	YER057C	HMF1	-0.0164679	1	no	no
YER063W::chr00_10	YER063W	THO1	-0.0519589	1	no	no
YER068W::chr5_3	YER068W	MOT2	0	0.5	no	no
YER071C::chr5_3	YER071C	TDA2	-0.413105	1	no	no
YER073W::chr5_3	YER073W	ALD5	-0.0967601	1	no	no
YER074W::chr5_3	YER074W	RPS24A	0.439149	0	no	no
YER075C::chr5_3	YER075C	PTP3	0	0.5	no	no
YER079W::chr5_3	YER079W	YER079W	0	0.5	no	no
YER080W::chr5_3	YER080W	AIM9	-0.071306	1	no	no
YER081W::chr5_3	YER081W	SER3	-0.0581587	1	no	no
YER082C::chr5_3	YER082C	UTP7	-0.155326	1	no	no
YER083C::chr5_3	YER083C	GET2	-0.00744315	1	no	no
YER084W::chr5_3	YER084W	YER084W	0	0.5	no	no
YER085C::chr5_3	YER085C	YER085C	0	0.5	no	no
YER086W::chr5_3	YER086W	ILV1	0	0.5	no	no
YER087W::chr5_3	YER087W	AIM10	0	0.5	no	no
YER089C::chr00_17a	YER089C	PTC2	0.272529	0	no	no
YER090W::chr00_8	YER090W	TRP2	0	0.5	no	no
YER091C-A::chr00_2	YER091C-A	YER091C-A	0	0.5	no	no
YER093C-A::chr00_8	YER093C-A	AIM11	0	0.5	no	no
YER096W::chr00_8	YER096W	SHC1	0	0.5	no	no
YER097W::chr00_8	YER097W	YER097W	0.282315	0	no	no
YER106W::chr00_5	YER106W	MAM1	0	0.5	no	no
YER110C::chr00_5	YER110C	KAP123	0.0663419	0	no	no
YER112W::chr00_5	YER112W	LSM4	1.77636e-15	6.22096e-16	no	no
YER114C::chr00_5	YER114C	BOI2	0	0.5	no	no
YER115C::chr00_5	YER115C	SPR6	0	0.5	no	no
YER116C::chr00_5	YER116C	SLX8	0	0.5	no	no
YER117W::chr00_5	YER117W	RPL23B	0	0.5	no	no
YER119C::chr00_5	YER119C	AVT6	0	0.5	no	no
YER119C-A::chr00_5	YER119C-A	YER119C-A	1.77636e-15	6.22096e-16	no	no
YER120W::chr00_5	YER120W	SCS2	1.77636e-15	6.22096e-16	no	no
YER121W::chr00_5	YER121W	YER121W	0.158893	0	no	no
YER122C::chr00_5	YER122C	GLO3	0	0.5	no	no
YER124C::chr00_5	YER124C	DSE1	1.77636e-15	6.22096e-16	no	no
YER125W::chr00_5	YER125W	RSP5	0	0.5	no	no
YER126C::chr00_5	YER126C	NSA2	-0.0451282	1	no	no
YER127W::chr00_5	YER127W	LCP5	0	0.5	no	no
YER128W::chr00_5	YER128W	VFA1	0	0.5	no	no
YER130C::chr00_5	YER130C	YER130C	0.118101	0	no	no
YER133W::chr00_5	YER133W	GLC7	0	0.5	no	no
YER142C::chr00_5	YER142C	MAG1	0.240738	0	no	no
YER144C::chr00_2	YER144C	UBP5	-0.0101491	1	no	no
YER146W::chr00_5	YER146W	LSM5	0	0.5	no	no
YER156C::chr00_5	YER156C	YER156C	0	0.5	no	no
YER158C::chr00_5	YER158C	YER158C	0	0.5	no	no
YER162C::chr00_5	YER162C	RAD4	1.47141	0	yes	yes
YER164W::chr00_5	YER164W	CHD1	0	0.5	no	no
YER169W::chr00_5	YER169W	RPH1	0	0.5	no	no
YER172C::chr00_5	YER172C	BRR2	0	0.5	no	no
YER176W::chr00_5	YER176W	ECM32	1.77636e-15	6.22096e-16	no	no
YER178W::chr00_5	YER178W	PDA1	-0.288001	1	no	no
YER179W::chr00_5	YER179W	DMC1	-0.404045	1	no	no
YER184C::chr00_5	YER184C	YER184C	8.88178e-16	3.16712e-05	no	no
YER185W::chr00_5	YER185W	PUG1	0	0.5	no	no
YER186C::chr00_5	YER186C	YER186C	0.088545	0	yes	yes
YER187W::chr00_5	YER187W	YER187W	0.0520837	0	no	no
YER188W::chr00_2	YER188W	YER188W	0	0.5	no	no
YFL002C::chr00_17a	YFL002C	SPB4	0	0.5	no	no
YFL003C::chr00_17a	YFL003C	MSH4	0	0.5	no	no
YFL009W::chr6_1	YFL009W	CDC4	0	0.5	no	no
YFL010C::chr00_17a	YFL010C	WWM1	-0.0875655	1	no	no
YFL014W::chr00_15	YFL014W	HSP12	0	0.5	no	no
YFL018C::chr6_1	YFL018C	LPD1	0.102012	0	no	no
YFL018W-A::chr6_1	YFL017W-A	SMX2	0	0.5	no	no
YFL020C::chr6_1	YFL020C	PAU5	-0.155383	1	no	no
YFL026W::chr6_1	YFL026W	STE2	0	0.5	no	no
YFL027C::chr6_1	YFL027C	GYP8	0	0.5	no	no
YFL028C::chr6_1	YFL028C	CAF16	0.0704123	0	no	no
YFL031W::chr6_1	YFL031W	HAC1	-0.205513	1	no	no
YFL032W::chr6_1	YFL032W	YFL032W	-0.114542	1	no	no
YFL033C::chr00_17a/chr00_18	YFL033C	RIM15	0	0.5	no	no
YFL034C-A::chr00_2	YFL034C-A	RPL22B	0	0.5	no	no
YFL034W::chr6_1	YFL034W	YFL034W	0	0.5	no	no
YFL035C::chr6_1	YFL034C-B	MOB2	0	0.5	no	no
YFL035C-A::chr6_1	YFL034C-B	MOB2	0	0.5	no	no
YFL035C-B::chr6_1	YFL034C-A	RPL22B	0.36353	0	yes	yes
YFL038C::chr6_1	YFL038C	YPT1	0	0.5	no	no
YFL041W::chr6_1	YFL041W	FET5	0	0.5	no	no
YFL047W::chr6_1	YFL047W	RGD2	0	0.5	no	no
YFL049W::chr6_1	YFL049W	SWP82	0.237721	0	no	no
YFL050C::chr6_1	YFL050C	ALR2	1.77636e-15	6.22096e-16	no	no
YFL051C::chr6_1	YFL051C	YFL051C	-0.0480169	1	no	no
YFL052W::chr6_1	YFL052W	YFL052W	0	0.5	no	no
YFL056C::chr6_1	YFL056C	AAD6	0	0.5	no	no
YFR001W::chr6_1	YFR001W	LOC1	-0.270482	1	no	no
YFR002W::chr00_18	YFR002W	NIC96	0.0298042	0	no	no
YFR004W::chr6_1	YFR004W	RPN11	8.88178e-16	3.16712e-05	no	no
YFR005C::chr6_1	YFR005C	SAD1	0	0.5	no	no
YFR006W::chr6_1	YFR006W	YFR006W	0.138585	0	no	no
YFR007W::chr6_1	YFR007W	YFH7	0	0.5	no	no
YFR008W::chr6_1	YFR008W	FAR7	0.0633403	0	no	no
YFR009W::chr6_1	YFR009W	GCN20	-0.339063	1	no	no
YFR011C::chr6_1	YFR011C	AIM13	0	0.5	no	no
YFR012W::chr6_1	YFR012W	DCV1	0	0.5	no	no
YFR015C::chr6_1	YFR015C	GSY1	1.77636e-15	6.22096e-16	no	no
YFR019W::chr00_15	YFR019W	FAB1	0	0.5	no	no
YFR021W::chr6_1	YFR021W	ATG18	0	0.5	no	no
YFR022W::chr6_1	YFR022W	ROG3	-0.506482	1	no	no
YFR023W::chr6_1	YFR023W	PES4	8.88178e-16	3.16712e-05	no	no
YFR024C::chr00_15	YFR024C-A	LSB3	0.202937	0	no	no
YFR027W::chr6_1	YFR027W	ECO1	0	0.5	no	no
YFR031C-A::chr6_1	YFR031C-A	RPL2A	1.77636e-15	6.22096e-16	no	no
YFR032C::chr00_2	YFR032C	RRT5	0	0.5	no	no
YFR033C::chr00_2	YFR033C	QCR6	0	0.5	no	no
YFR035C::chr00_2	YFR035C	YFR035C	1.77636e-15	6.22096e-16	no	no
YFR036W::chr00_2	YFR036W	CDC26	0	0.5	no	no
YFR037C::chr00_2	YFR037C	RSC8	8.88178e-16	3.16712e-05	no	no
YFR039C::chr00_14	YFR039C	YFR039C	0	0.5	no	no
YFR048W::chr00_2	YFR048W	RMD8	0	0.5	no	no
YFR049W::chr00_2	YFR049W	YMR31	0	0.5	no	no
YFR052W::chr00_2	YFR052W	RPN12	-0.497586	1	no	no
YFR053C::chr00_2	YFR053C	HXK1	0	0.5	no	no
YFR054C::chr00_2	YFR054C	YFR054C	-0.345125	1	no	no
YFR055W::chr00_2	YFR055W	IRC7	0	0.5	no	no
YFR056C::chr00_2	YFR056C	YFR056C	-0.175292	1	no	no
YFR057W::chr00_2	YFR057W	YFR057W	0	0.5	no	no
YGL001C::chr7_1	YGL001C	ERG26	0	0.5	no	no
YGL002W::chr7_1	YGL002W	ERP6	0	0.5	no	no
YGL003C::chr7_1	YGL003C	CDH1	1.77636e-15	6.22096e-16	no	no
YGL007W::chr7_1	YGL007W	BRP1	-0.188921	1	no	no
YGL008C::chr7_1	YGL008C	PMA1	0	0.5	no	no
YGL009C::chr7_1	YGL009C	LEU1	0	0.5	no	no
YGL010W::chr7_1	YGL010W	YGL010W	0	0.5	no	no
YGL011C::chr7_1	YGL011C	SCL1	0	0.5	no	no
YGL013C::chr7_1	YGL013C	PDR1	1.77636e-15	6.22096e-16	no	no
YGL014W::chr7_1	YGL014W	PUF4	1.77636e-15	6.22096e-16	no	no
YGL015C::chr7_1	YGL015C	YGL015C	-0.166249	1	no	no
YGL016W::chr7_1	YGL016W	KAP122	0	0.5	no	no
YGL017W::chr7_1	YGL017W	ATE1	0	0.5	no	no
YGL018C::chr7_1	YGL018C	JAC1	0	0.5	no	no
YGL019W::chr7_1	YGL019W	CKB1	0	0.5	no	no
YGL020C::chr7_1	YGL020C	GET1	0	0.5	no	no
YGL021W::chr7_1	YGL021W	ALK1	0	0.5	no	no
YGL023C::chr7_1	YGL023C	PIB2	0	0.5	no	no
YGL024W::chr7_1	YGL024W	YGL024W	0	0.5	no	no
YGL025C::chr7_1	YGL025C	PGD1	-0.0688221	1	no	no
YGL026C::chr7_1	YGL026C	TRP5	1.77636e-15	6.22096e-16	no	no
YGL027C::chr7_1	YGL027C	CWH41	0.071517	0	no	no
YGL028C::chr7_1	YGL028C	SCW11	0	0.5	no	no
YGL029W::chr7_1	YGL029W	CGR1	0	0.5	no	no
YGL031C::chr7_1	YGL031C	RPL24A	-0.0652326	1	no	no
YGL033W::chr7_1	YGL033W	HOP2	1.77636e-15	6.22096e-16	no	no
YGL035C::chr7_1	YGL035C	MIG1	0	0.5	no	no
YGL036W::chr7_1	YGL036W	YGL036W	0	0.5	no	no
YGL037C::chr7_1	YGL037C	PNC1	0	0.5	no	no
YGL038C::chr7_1	YGL038C	OCH1	0	0.5	no	no
YGL039W::chr7_1	YGL039W	YGL039W	0	0.5	no	no
YGL040C::chr7_1	YGL040C	HEM2	1.77636e-15	6.22096e-16	no	no
YGL041C::chr7_1	YGL041C	YGL041C	0	0.5	no	no
YGL042C::chr7_1	YGL042C	YGL042C	-0.0860636	1	no	no
YGL043W::chr7_1	YGL043W	DST1	1.77636e-15	6.22096e-16	no	no
YGL044C::chr7_1	YGL044C	RNA15	0	0.5	no	no
YGL045W::chr7_1	YGL045W	RIM8	1.77636e-15	6.22096e-16	no	no
YGL046W::chr7_1	YGL045W	RIM8	1.77636e-15	6.22096e-16	no	no
YGL047W::chr7_1	YGL047W	ALG13	0	0.5	no	no
YGL048C::chr7_1	YGL048C	RPT6	0	0.5	no	no
YGL049C::chr7_1	YGL049C	TIF4632	-0.0572256	1	no	no
YGL051W::chr7_1	YGL051W	MST27	-0.256205	1	no	no
YGL053W::chr7_1	YGL053W	PRM8	0	0.5	no	no
YGL054C::chr7_1	YGL054C	ERV14	1.77636e-15	6.22096e-16	no	no
YGL055W::chr7_1	YGL055W	OLE1	0	0.5	no	no
YGL056C::chr7_1	YGL056C	SDS23	1.77636e-15	6.22096e-16	no	no
YGL057C::chr7_1	YGL057C	GEP7	0.0474654	0	no	no
YGL058W::chr7_1	YGL058W	RAD6	0.163734	0	no	no
YGL059W::chr7_1	YGL059W	PKP2	0	0.5	no	no
YGL060W::chr7_1	YGL060W	YBP2	0	0.5	no	no
YGL061C::chr7_1	YGL061C	DUO1	0	0.5	no	no
YGL062W::chr7_1	YGL062W	PYC1	-0.022043	1	no	no
YGL063W::chr7_1	YGL063W	PUS2	0	0.5	no	no
YGL064C::chr7_1	YGL064C	MRH4	-0.0229606	1	no	no
YGL065C::chr7_1	YGL065C	ALG2	0.0658911	0	no	no
YGL066W::chr7_1	YGL066W	SGF73	1.77636e-15	6.22096e-16	no	no
YGL067W::chr7_1	YGL067W	NPY1	0	0.5	no	no
YGL068W::chr7_1	YGL068W	MNP1	0	0.5	no	no
YGL069C::chr7_1	YGL069C	YGL069C	0	0.5	no	no
YGL070C::chr7_1	YGL070C	RPB9	1.77636e-15	6.22096e-16	no	no
YGL071W::chr7_1	YGL071W	AFT1	0.0151229	0	no	no
YGL072C::chr7_1	YGL072C	YGL072C	0.432706	0	no	no
YGL073W::chr7_1	YGL073W	HSF1	0	0.5	no	no
YGL074C::chr7_1	YGL074C	YGL074C	0	0.5	no	no
YGL075C::chr7_1	YGL075C	MPS2	0	0.5	no	no
YGL076C::chr7_1	YGL076C	RPL7A	0	0.5	no	no
YGL077C::chr7_1	YGL077C	HNM1	0	0.5	no	no
YGL078C::chr7_1	YGL078C	DBP3	0	0.5	no	no
YGL080W::chr7_1	YGL080W	FMP37	0	0.5	no	no
YGL081W::chr7_1	YGL081W	YGL081W	1.77636e-15	6.22096e-16	no	no
YGL082W::chr7_1	YGL082W	YGL082W	0	0.5	no	no
YGL083W::chr7_1	YGL083W	SCY1	0	0.5	no	no
YGL084C::chr7_1	YGL084C	GUP1	0.221828	0	no	no
YGL085W::chr7_1	YGL085W	LCL3	-0.0943158	1	no	no
YGL086W::chr7_1	YGL086W	MAD1	-0.152371	1	no	no
YGL088W::chr7_1	YGL088W	YGL088W	0	0.5	no	no
YGL089C::chr7_1	YGL089C	MF(ALPHA)2	0.0740548	0	no	no
YGL090W::chr7_1	YGL090W	LIF1	-0.143508	1	no	no
YGL091C::chr7_1	YGL091C	NBP35	1.77636e-15	6.22096e-16	no	no
YGL092W::chr7_1	YGL092W	NUP145	-0.101485	1	no	no
YGL093W::chr7_1	YGL093W	SPC105	0.159938	0	no	no
YGL094C::chr7_1	YGL094C	PAN2	-0.183997	1	no	no
YGL095C::chr7_1	YGL095C	VPS45	0	0.5	no	no
YGL096W::chr7_1	YGL096W	TOS8	0	0.5	no	no
YGL097W::chr7_1/chr00_17a	YGL097W	SRM1	0.168927	0	no	no
YGL098W::chr7_2	YGL098W	USE1	-0.314912	1	no	no
YGL102C::chr7_2	YGL102C	YGL102C	0.0378805	0	no	no
YGL103W::chr7_2	YGL103W	RPL28	0.562466	0	no	no
YGL105W::chr7_2	YGL105W	ARC1	0	0.5	no	no
YGL109W::chr7_2	YGL109W	YGL109W	-0.125437	1	no	no
YGL110C::chr7_2	YGL110C	CUE3	0	0.5	no	no
YGL111W::chr7_2	YGL111W	NSA1	0	0.5	no	no
YGL112C::chr7_2	YGL112C	TAF6	0	0.5	no	no
YGL113W::chr7_2	YGL113W	SLD3	0.204701	0	no	no
YGL114W::chr7_2	YGL114W	YGL114W	1.77636e-15	6.22096e-16	no	no
YGL115W::chr7_2	YGL115W	SNF4	0.0544256	0	no	no
YGL116W::chr7_2	YGL116W	CDC20	1.77636e-15	6.22096e-16	no	no
YGL117W::chr7_2	YGL117W	YGL117W	0.0557652	0	no	no
YGL118C::chr7_2	YGL118C	YGL118C	0	0.5	no	no
YGL120C::chr7_2	YGL120C	PRP43	0	0.5	no	no
YGL121C::chr7_2	YGL121C	GPG1	0	0.5	no	no
YGL122C::chr7_2	YGL122C	NAB2	0	0.5	no	no
YGL123W::chr7_2	YGL123W	RPS2	0	0.5	no	no
YGL124C::chr7_2	YGL124C	MON1	-0.465444	1	no	no
YGL125W::chr7_2	YGL125W	MET13	1.77636e-15	6.22096e-16	no	no
YGL126W::chr7_2	YGL126W	SCS3	0	0.5	no	no
YGL127C::chr7_2	YGL127C	SOH1	0	0.5	no	no
YGL128C::chr7_2	YGL128C	CWC23	0	0.5	no	no
YGL129C::chr7_2	YGL129C	RSM23	0	0.5	no	no
YGL130W::chr7_2	YGL130W	CEG1	0	0.5	no	no
YGL131C::chr7_2	YGL131C	SNT2	0	0.5	no	no
YGL132W::chr7_2	YGL132W	YGL132W	-0.294628	1	no	no
YGL133W::chr7_2	YGL133W	ITC1	0	0.5	no	no
YGL137W::chr7_2	YGL137W	SEC27	0.264286	0	no	no
YGL138C::chr7_2	YGL138C	YGL138C	-0.121815	1	no	no
YGL139W::chr7_2	YGL139W	FLC3	0	0.5	no	no
YGL140C::chr7_2	YGL140C	YGL140C	0	0.5	no	no
YGL141W::chr7_2	YGL141W	HUL5	8.88178e-16	3.16712e-05	no	no
YGL146C::chr7_2	YGL146C	RRT6	8.88178e-16	3.16712e-05	no	no
YGL148W::chr7_2	YGL148W	ARO2	8.88178e-16	3.16712e-05	no	no
YGL153W::chr7_2	YGL153W	PEX14	0	0.5	no	no
YGL155W::chr7_2	YGL155W	CDC43	8.88178e-16	3.16712e-05	no	no
YGL169W::chr7_2	YGL169W	SUA5	0	0.5	no	no
YGL172W::chr7_2	YGL172W	NUP49	0.177471	0	no	no
YGL207W::chr7_3	YGL207W	SPT16	8.88178e-16	3.16712e-05	no	no
YGL222C::chr7_3	YGL222C	EDC1	0	0.5	no	no
YGL226C-A::chr7_3	YGL226C-A	OST5	-0.115141	1	no	no
YGL254W::chr7_3	YGL254W	FZF1	8.88178e-16	3.16712e-05	no	no
YGR007W::chr7_3	YGR007W	ECT1	0	0.5	no	no
YGR009C::chr7_3	YGR009C	SEC9	0	0.5	no	no
YGR010W::chr7_3	YGR010W	NMA2	0.0448064	0	no	no
YGR011W::chr7_3/chr00_12	YGR011W	YGR011W	0.136448	0	no	no
YGR013W::chr7_3	YGR013W	SNU71	1.77636e-15	6.22096e-16	no	no
YGR014W::chr7_3	YGR014W	MSB2	0	0.5	no	no
YGR016W::chr7_3	YGR016W	YGR016W	0	0.5	no	no
YGR017W::chr7_3	YGR017W	YGR017W	-0.277041	1	no	no
YGR018C::chr7_3/chr00_12	YGR018C	YGR018C	-0.039899	1	no	no
YGR019W::chr7_3	YGR019W	UGA1	-0.0859596	1	no	no
YGR021W::chr7_3	YGR021W	YGR021W	-0.449833	1	no	no
YGR022C::chr7_3/chr00_12	YGR022C	YGR022C	0	0.5	no	no
YGR023W::chr7_3	YGR023W	MTL1	0	0.5	no	no
YGR025W::chr7_3/chr00_12	YGR025W	YGR025W	0	0.5	no	no
YGR026W::chr7_3	YGR026W	YGR026W	0.0509658	0	no	no
YGR044C::chr7_4	YGR044C	RME1	0	0.5	no	no
YGR045C::chr7_4	YGR045C	YGR045C	0	0.5	no	no
YGR046W::chr00_14	YGR046W	TAM41	0	0.5	no	no
YGR048W::chr00_14	YGR048W	UFD1	0	0.5	no	no
YGR051C::chr7_4	YGR051C	YGR051C	0	0.5	no	no
YGR052W::chr7_4	YGR052W	FMP48	0	0.5	no	no
YGR055W::chr7_4	YGR055W	MUP1	0	0.5	no	no
YGR056W::chr7_4	YGR056W	RSC1	0.20783	0	no	no
YGR057C::chr7_4	YGR057C	LST7	0.0354094	0	no	no
YGR058W::chr7_4	YGR058W	PEF1	-0.150221	1	no	no
YGR059W::chr7_4	YGR059W	SPR3	0	0.5	no	no
YGR060W::chr7_4	YGR060W	ERG25	0	0.5	no	no
YGR061C::chr7_4	YGR061C	ADE6	-0.140163	1	no	no
YGR063C::chr00_14	YGR063C	SPT4	0.0025155	0	no	no
YGR065C::chr7_4	YGR065C	VHT1	0.324909	0	no	no
YGR072W::chr7_4	YGR072W	UPF3	0	0.5	no	no
YGR077C::chr7_4	YGR077C	PEX8	-0.0831366	1	no	no
YGR078C::chr7_4	YGR078C	PAC10	0	0.5	no	no
YGR080W::chr7_4	YGR080W	TWF1	0	0.5	no	no
YGR081C::chr7_4	YGR081C	SLX9	1.77636e-15	6.22096e-16	no	no
YGR082W::chr00_14	YGR082W	TOM20	0	0.5	no	no
YGR084C::chr7_4	YGR084C	MRP13	0	0.5	no	no
YGR088W::chr7_4	YGR088W	CTT1	0	0.5	no	no
YGR089W::chr00_14	YGR089W	NNF2	0	0.5	no	no
YGR091W::chr7_4	YGR091W	PRP31	1.77636e-15	6.22096e-16	no	no
YGR092W::chr00_14	YGR092W	DBF2	-0.314844	1	no	no
YGR093W::chr00_14	YGR093W	YGR093W	0	0.5	no	no
YGR094W::chr7_4	YGR094W	VAS1	-0.0379378	1	no	no
YGR095C::chr7_4	YGR095C	RRP46	0	0.5	no	no
YGR096W::chr7_4	YGR096W	TPC1	0	0.5	no	no
YGR098C::chr7_4	YGR098C	ESP1	0.0473996	0	no	no
YGR100W::chr7_4	YGR100W	MDR1	-0.107955	1	no	no
YGR101W::chr7_4	YGR101W	PCP1	0	0.5	no	no
YGR102C::chr7_4	YGR102C	GTF1	0	0.5	no	no
YGR103W::chr7_4	YGR103W	NOP7	1.77636e-15	6.22096e-16	no	no
YGR104C::chr7_4	YGR104C	SRB5	0	0.5	no	no
YGR105W::chr7_4	YGR105W	VMA21	-0.0138122	1	no	no
YGR106C::chr00_14	YGR106C	VOA1	-0.178717	1	no	no
YGR108W::chr7_4	YGR108W	CLB1	0.0780637	0	no	no
YGR109C::chr7_4	YGR109C	CLB6	0.102889	0	no	no
YGR111W::chr7_4	YGR111W	YGR111W	0	0.5	no	no
YGR113W::chr7_4	YGR113W	DAM1	0.242822	0	no	no
YGR114C::chr7_4	YGR114C	YGR114C	0.0719989	0	no	no
YGR116W::chr00_14	YGR116W	SPT6	0.238384	0	no	no
YGR118W::chr7_4	YGR118W	RPS23A	-0.0959165	1	no	no
YGR119C::chr7_4	YGR119C	NUP57	0.0669103	0	no	no
YGR120C::chr7_4	YGR120C	COG2	-0.279863	1	no	no
YGR121C::chr7_4	YGR121C	MEP1	0	0.5	no	no
YGR124W::chr7_5	YGR124W	ASN2	0	0.5	no	no
YGR125W::chr7_5	YGR125W	YGR125W	0	0.5	no	no
YGR126W::chr7_5	YGR126W	YGR126W	0	0.5	no	no
YGR127W::chr7_5	YGR127W	YGR127W	0	0.5	no	no
YGR128C::chr7_5	YGR128C	UTP8	0	0.5	no	no
YGR129W::chr7_5	YGR129W	SYF2	0	0.5	no	no
YGR131W::chr7_5	YGR131W	FHN1	-0.348365	1	no	no
YGR132C::chr7_5	YGR132C	PHB1	0	0.5	no	no
YGR134W::chr00_8	YGR134W	CAF130	1.77636e-15	6.22096e-16	no	no
YGR135W::chr7_5	YGR135W	PRE9	0.219233	0	no	no
YGR136W::chr7_5	YGR136W	LSB1	0	0.5	no	no
YGR137W::chr7_5	YGR137W	YGR137W	0	0.5	no	no
YGR138C::chr7_5	YGR138C	TPO2	0	0.5	no	no
YGR141W::chr7_5	YGR141W	VPS62	8.88178e-16	3.16712e-05	no	no
YGR142W::chr7_5	YGR142W	BTN2	0	0.5	no	no
YGR143W::chr7_5	YGR143W	SKN1	0.0879562	0	yes	yes
YGR144W::chr7_5	YGR144W	THI4	0	0.5	no	no
YGR145W::chr00_15	YGR145W	ENP2	0	0.5	no	no
YGR147C::chr7_5	YGR147C	NAT2	8.88178e-16	3.16712e-05	no	no
YGR148C::chr7_5	YGR148C	RPL24B	0	0.5	no	no
YGR150C::chr7_5	YGR150C	CCM1	0	0.5	no	no
YGR153W::chr7_5	YGR153W	YGR153W	1.77636e-15	6.22096e-16	no	no
YGR154C::chr7_5	YGR154C	GTO1	0	0.5	no	no
YGR155W::chr00_11	YGR155W	CYS4	-0.0720433	1	no	no
YGR155W::chr7_5	YGR155W	CYS4	0.0123478	0	no	no
YGR156W::chr7_5	YGR156W	PTI1	-0.0149178	1	no	no
YGR159C::chr7_5	YGR159C	NSR1	-0.0260206	1	no	no
YGR160W::chr7_5	YGR160W	YGR160W	0	0.5	no	no
YGR161C::chr7_5	YGR161C	RTS3	0	0.5	no	no
YGR162W::chr00_17a	YGR162W	TIF4631	-0.154671	1	no	no
YGR163W::chr7_5	YGR163W	GTR2	0	0.5	no	no
YGR164W::chr7_5	YGR164W	YGR164W	-0.0975732	1	no	no
YGR165W::chr7_5	YGR165W	MRPS35	-0.171407	1	no	no
YGR167W::chr7_5	YGR167W	CLC1	-0.00690892	1	no	no
YGR168C::chr7_5	YGR168C	YGR168C	0	0.5	no	no
YGR169C::chr7_5	YGR169C	PUS6	0	0.5	no	no
YGR170W::chr7_5	YGR170W	PSD2	0.0857138	0	no	no
YGR171C::chr7_5	YGR171C	MSM1	-0.376901	1	no	no
YGR172C::chr7_5	YGR172C	YIP1	-0.0749865	1	no	no
YGR173W::chr7_5	YGR173W	RBG2	0	0.5	no	no
YGR175C::chr7_5	YGR175C	ERG1	0	0.5	no	no
YGR176W::chr7_5	YGR176W	YGR176W	-0.0357815	1	no	no
YGR180C::chr7_5	YGR180C	RNR4	0.157436	0	no	no
YGR181W::chr7_5	YGR181W	TIM13	0	0.5	no	no
YGR182C::chr7_5	YGR182C	YGR182C	-0.0626734	1	no	no
YGR183C::chr7_5	YGR183C	QCR9	-1.08412	1	no	no
YGR184C::chr7_5	YGR184C	UBR1	-0.22463	1	no	no
YGR185C::chr7_5	YGR185C	TYS1	0	0.5	no	no
YGR187C::chr7_5	YGR187C	HGH1	0	0.5	no	no
YGR188C::chr00_10	YGR188C	BUB1	0	0.5	no	no
YGR189C::chr7_5	YGR189C	CRH1	0.0943193	0	no	no
YGR190C::chr7_5	YGR190C	YGR190C	0	0.5	no	no
YGR191W::chr7_5	YGR191W	HIP1	0	0.5	no	no
YGR194C::chr7_5	YGR194C	XKS1	0	0.5	no	no
YGR195W::chr7_5	YGR195W	SKI6	0	0.5	no	no
YGR196C::chr7_5	YGR196C	FYV8	1.77636e-15	6.22096e-16	no	no
YGR198W::chr7_5	YGR198W	YPP1	0	0.5	no	no
YGR199W::chr7_5	YGR199W	PMT6	0	0.5	no	no
YGR201C::chr00_10	YGR201C	YGR201C	0	0.5	no	no
YGR202C::chr7_5	YGR202C	PCT1	0	0.5	no	no
YGR203W::chr7_5	YGR203W	YCH1	1.77636e-15	6.22096e-16	no	no
YGR204W::chr00_10	YGR204W	ADE3	0	0.5	no	no
YGR205W::chr7_5	YGR205W	TDA10	0	0.5	no	no
YGR207C::chr7_5	YGR207C	CIR1	-0.0152221	1	no	no
YGR208W::chr7_5	YGR208W	SER2	0	0.5	no	no
YGR209C::chr7_5	YGR209C	TRX2	0.0701908	0	no	no
YGR211W::chr7_5	YGR211W	ZPR1	1.77636e-15	6.22096e-16	no	no
YGR212W::chr7_5	YGR212W	SLI1	0	0.5	no	no
YGR213C::chr7_5	YGR213C	RTA1	0	0.5	no	no
YGR214W::chr7_5	YGR214W	RPS0A	0.0145662	0	no	no
YGR217W::chr7_5	YGR217W	CCH1	0	0.5	no	no
YGR218W::chr7_5	YGR218W	CRM1	0.255669	0	no	no
YGR219W::chr00_2	YGR219W	YGR219W	1.77636e-15	6.22096e-16	no	no
YGR220C::chr00_2	YGR220C	MRPL9	1.77636e-15	6.22096e-16	no	no
YGR222W::chr00_2	YGR222W	PET54	0	0.5	no	no
YGR223C::chr00_2	YGR223C	HSV2	-0.0896246	1	no	no
YGR227W::chr00_2	YGR227W	DIE2	0	0.5	no	no
YGR232W::chr00_2	YGR232W	NAS6	0.294287	0	no	no
YGR236C::chr00_2	YGR236C	SPG1	0	0.5	no	no
YGR237C::chr00_2	YGR237C	YGR237C	0	0.5	no	no
YGR239C::chr00_14	YGR239C	PEX21	0	0.5	no	no
YGR246C::chr00_2	YGR246C	BRF1	0	0.5	no	no
YGR251W::chr00_2	YGR251W	NOP19	0	0.5	no	no
YGR254W::chr00_17a	YGR254W	ENO1	0	0.5	no	no
YGR256W::chr00_3	YGR256W	GND2	-0.0670482	1	no	no
YGR258C::chr00_17a	YGR258C	RAD2	0	0.5	no	no
YGR260W::chr00_3	YGR260W	TNA1	0.0353755	0	no	no
YGR261C::chr00_3	YGR261C	APL6	0	0.5	no	no
YGR262C::chr00_3	YGR262C	BUD32	0	0.5	no	no
YGR264C::chr00_3	YGR264C	MES1	0	0.5	no	no
YGR270W::chr00_3	YGR270W	YTA7	0.17072	0	no	no
YGR271W::chr00_17a	YGR271W	SLH1	-0.336304	1	no	no
YGR278W::chr00_3	YGR278W	CWC22	-0.292621	1	no	no
YGR279C::chr00_3	YGR279C	SCW4	0	0.5	no	no
YGR281W::chr00_3	YGR281W	YOR1	0	0.5	no	no
YGR284C::chr00_3	YGR284C	ERV29	0	0.5	no	no
YGR287C::chr00_3	YGR287C	IMA1	0	0.5	no	no
YGR289C::chr00_17a	YGR289C	MAL11	0	0.5	no	no
YGR292W::chr00_17a	YGR292W	MAL12	0	0.5	no	no
YHL008C::chr8_1	YHL008C	YHL008C	0	0.5	no	no
YHL010C::chr8_1	YHL010C	ETP1	1.77636e-15	6.22096e-16	no	no
YHL012W::chr8_1	YHL012W	YHL012W	0	0.5	no	no
YHL014C::chr8_1	YHL014C	YLF2	0.00681386	0	no	no
YHL015W::chr8_1	YHL015W	RPS20	0.35038	0	no	no
YHL016C::chr8_1	YHL016C	DUR3	0	0.5	no	no
YHL017W::chr8_1	YHL017W	YHL017W	-0.360535	1	no	no
YHL019C::chr8_1	YHL019C	APM2	0	0.5	no	no
YHL021C::chr8_1	YHL021C	AIM17	0	0.5	no	no
YHL022C::chr8_1	YHL022C	SPO11	0	0.5	no	no
YHL025W::chr00_8	YHL025W	SNF6	0.161703	0	no	no
YHL026C::chr8_1	YHL026C	YHL026C	-0.0552271	1	no	no
YHL027W::chr8_1	YHL027W	RIM101	0	0.5	no	no
YHL028W::chr8_1	YHL028W	WSC4	0	0.5	no	no
YHL029C::chr8_1	YHL029C	OCA5	-0.356003	1	no	no
YHL031C::chr8_1	YHL031C	GOS1	0	0.5	no	no
YHL033C::chr8_1	YHL033C	RPL8A	0	0.5	no	no
YHL034C::chr8_1	YHL034C	SBP1	0	0.5	no	no
YHL035C::chr8_1	YHL035C	VMR1	0	0.5	no	no
YHL036W::chr8_1	YHL036W	MUP3	8.88178e-16	3.16712e-05	no	no
YHL037C::chr8_1	YHL037C	YHL037C	0	0.5	no	no
YHL038C::chr8_1	YHL038C	CBP2	-0.181174	1	no	no
YHL039W::chr00_10	YHL039W	EFM1	0	0.5	no	no
YHL040C::chr8_1	YHL040C	ARN1	0.0782371	0	no	no
YHL042W::chr8_1	YHL042W	YHL042W	0.167542	0	no	no
YHL043W::chr8_1	YHL043W	ECM34	0	0.5	no	no
YHL044W::chr8_1	YHL044W	YHL044W	0	0.5	no	no
YHL047C::chr8_1	YHL047C	ARN2	0	0.5	no	no
YHR001W-A::chr8_1	YHR001W-A	QCR10	0.205317	0	no	no
YHR005C-A::chr00_3	YHR005C-A	TIM10	0	0.5	no	no
YHR006W::chr00_10	YHR006W	STP2	0	0.5	no	no
YHR010W::chr8_1	YHR010W	RPL27A	0.719418	0	no	no
YHR012W::chr8_1	YHR012W	VPS29	0	0.5	no	no
YHR015W::chr8_1	YHR015W	MIP6	0	0.5	no	no
YHR016C::chr00_8	YHR016C	YSC84	0	0.5	no	no
YHR017W::chr00_8	YHR017W	YSC83	0	0.5	no	no
YHR020W::chr8_1	YHR020W	YHR020W	0.0629366	0	no	no
YHR021C::chr8_1	YHR021C	RPS27B	0.545421	0	no	no
YHR022C::chr8_1	YHR022C	YHR022C	0	0.5	no	no
YHR028C::chr8_1	YHR028C	DAP2	0.0233761	0	no	no
YHR030C::chr8_1	YHR030C	SLT2	0	0.5	no	no
YHR031C::chr8_1	YHR031C	RRM3	0.187145	0	no	no
YHR032W::chr00_8	YHR032W	ERC1	0	0.5	no	no
YHR034C::chr8_1	YHR034C	PIH1	0	0.5	no	no
YHR037W::chr8_1	YHR037W	PUT2	1.77636e-15	6.22096e-16	no	no
YHR038W::chr8_1	YHR038W	RRF1	0	0.5	no	no
YHR039C::chr8_1	YHR039C	MSC7	0	0.5	no	no
YHR040W::chr8_1	YHR040W	BCD1	0	0.5	no	no
YHR043C::chr8_1	YHR043C	DOG2	0.147067	0	no	no
YHR045W::chr00_8	YHR045W	YHR045W	1.77636e-15	6.22096e-16	no	no
YHR050W::chr8_2	YHR050W	SMF2	0	0.5	no	no
YHR051W::chr8_2	YHR051W	COX6	0	0.5	no	no
YHR057C::chr8_2	YHR057C	CPR2	0	0.5	no	no
YHR060W::chr8_2	YHR060W	VMA22	-0.143809	1	no	no
YHR061C::chr8_2	YHR061C	GIC1	-0.00943471	1	no	no
YHR062C::chr8_2	YHR062C	RPP1	0	0.5	no	no
YHR065C::chr8_2	YHR065C	RRP3	0	0.5	no	no
YHR066W::chr8_2	YHR066W	SSF1	0	0.5	no	no
YHR068W::chr8_2	YHR068W	DYS1	1.77636e-15	6.22096e-16	no	no
YHR073W::chr8_2	YHR073W	OSH3	0	0.5	no	no
YHR074W::chr8_2	YHR074W	QNS1	8.88178e-16	3.16712e-05	no	no
YHR075C::chr8_2	YHR075C	PPE1	0	0.5	no	no
YHR076W::chr8_2	YHR076W	PTC7	0	0.5	no	no
YHR081W::chr8_2	YHR081W	LRP1	0.12745	0	no	no
YHR084W::chr8_2	YHR084W	STE12	8.88178e-16	3.16712e-05	no	no
YHR086W::chr8_2	YHR086W	NAM8	0.254701	0	no	no
YHR087W::chr8_2	YHR087W	RTC3	0	0.5	no	no
YHR101C::chr8_2	YHR101C	BIG1	0	0.5	no	no
YHR107C::chr8_2	YHR107C	CDC12	0.0609801	0	no	no
YHR109W::chr8_2	YHR109W	CTM1	0	0.5	no	no
YHR112C::chr8_2	YHR112C	YHR112C	-0.0822494	1	no	no
YHR113W::chr8_2	YHR113W	APE4	1.77636e-15	6.22096e-16	no	no
YHR114W::chr8_2	YHR114W	BZZ1	1.77636e-15	6.22096e-16	no	no
YHR115C::chr8_2	YHR115C	DMA1	0	0.5	no	no
YHR116W::chr8_2	YHR116W	COX23	0.0509511	0	no	no
YHR117W::chr8_2	YHR117W	TOM71	0.00714282	0	no	no
YHR118C::chr8_2	YHR118C	ORC6	-0.0560742	1	no	no
YHR120W::chr8_2	YHR120W	MSH1	0	0.5	no	no
YHR121W::chr8_2	YHR121W	LSM12	0	0.5	no	no
YHR122W::chr8_2	YHR122W	YHR122W	0	0.5	no	no
YHR123W::chr8_2	YHR123W	EPT1	8.88178e-16	3.16712e-05	no	no
YHR124W::chr8_2	YHR124W	NDT80	1.77636e-15	6.22096e-16	no	no
YHR125W::chr8_2	YHR125W	YHR125W	0	0.5	no	no
YHR126C::chr8_2	YHR126C	ANS1	-0.115379	1	no	no
YHR130C::chr8_2	YHR130C	YHR130C	0.136408	0	no	no
YHR132C::chr8_2	YHR132C	ECM14	-0.14456	1	no	no
YHR135C::chr8_2	YHR135C	YCK1	0	0.5	no	no
YHR136C::chr8_2	YHR136C	SPL2	8.88178e-16	3.16712e-05	no	no
YHR139C::chr8_2	YHR139C	SPS100	0	0.5	no	no
YHR139C-A::chr8_2	YHR139C-A	YHR139C-A	0	0.5	no	no
YHR158C::chr8_3	YHR158C	KEL1	8.88178e-16	3.16712e-05	no	no
YHR167W::chr8_3	YHR167W	THP2	0	0.5	no	no
YHR180W::chr00_10	YHR180W	YHR180W	0	0.5	no	no
YHR182W::chr8_3	YHR182W	YHR182W	0	0.5	no	no
YHR184W::chr8_3	YHR184W	SSP1	0	0.5	no	no
YHR186C::chr8_3	YHR186C	KOG1	0	0.5	no	no
YHR188C::chr8_3	YHR188C	GPI16	0	0.5	no	no
YHR191C::chr00_8	YHR191C	CTF8	0	0.5	no	no
YHR194W::chr00_10	YHR194W	MDM31	0	0.5	no	no
YHR202W::chr8_3	YHR202W	YHR202W	0	0.5	no	no
YHR209W::chr8_3	YHR209W	CRG1	8.88178e-16	3.16712e-05	no	no
YIL002C::chr9_1	YIL002C	INP51	0	0.5	no	no
YIL005W::chr9_1	YIL005W	EPS1	1.77636e-15	6.22096e-16	no	no
YIL006W::chr9_1	YIL006W	YIA6	8.88178e-16	3.16712e-05	no	no
YIL007C::chr9_1	YIL007C	NAS2	0	0.5	no	no
YIL009C-A::chr00_3	YIL009C-A	EST3	0	0.5	no	no
YIL010W::chr9_1	YIL010W	DOT5	-0.0854035	1	no	no
YIL011W::chr9_1	YIL011W	TIR3	0	0.5	no	no
YIL012W::chr9_1	YIL012W	YIL012W	0	0.5	no	no
YIL015C-A::chr9_1	YIL014C-A	YIL014C-A	1.77636e-15	6.22096e-16	no	no
YIL015W::chr9_1	YIL015W	BAR1	-0.0656549	1	no	no
YIL017C::chr9_1	YIL017C	VID28	0	0.5	no	no
YIL018W::chr9_1	YIL018W	RPL2B	0	0.5	no	no
YIL019W::chr9_1	YIL019W	FAF1	0	0.5	no	no
YIL020C::chr9_1	YIL020C	HIS6	0	0.5	no	no
YIL022W::chr9_1	YIL022W	TIM44	-0.0949385	1	no	no
YIL026C::chr9_1	YIL026C	IRR1	-0.293932	1	no	no
YIL028W::chr9_1	YIL028W	YIL028W	0.166116	0	no	no
YIL029C::chr9_1	YIL029C	YIL029C	0	0.5	no	no
YIL031W::chr9_1	YIL031W	ULP2	0	0.5	no	no
YIL033C::chr00_17b	YIL033C	BCY1	0	0.5	no	no
YIL034C::chr9_1	YIL034C	CAP2	0	0.5	no	no
YIL035C::chr9_1	YIL035C	CKA1	0.0381072	0	no	no
YIL036W::chr9_1	YIL036W	CST6	0	0.5	no	no
YIL037C::chr9_1	YIL037C	PRM2	-0.108075	1	no	no
YIL041W::chr9_1	YIL041W	GVP36	-0.526549	1	no	no
YIL045W::chr9_1	YIL045W	PIG2	0	0.5	no	no
YIL046W::chr9_1	YIL046W	MET30	8.88178e-16	3.16712e-05	no	no
YIL047C::chr9_1	YIL047C	SYG1	0.18161	0	no	no
YIL048W::chr9_1	YIL048W	NEO1	-0.0030966	1	no	no
YIL049W::chr9_1	YIL049W	DFG10	0	0.5	no	no
YIL050W::chr9_1	YIL050W	PCL7	0	0.5	no	no
YIL052C::chr9_1	YIL052C	RPL34B	0	0.5	no	no
YIL053W::chr9_1	YIL053W	RHR2	0	0.5	no	no
YIL054W::chr9_1	YIL054W	YIL054W	0	0.5	no	no
YIL055C::chr9_1	YIL055C	YIL055C	0.010102	0	no	no
YIL056W::chr9_1	YIL056W	VHR1	0	0.5	no	no
YIL057C::chr9_1	YIL057C	RGI2	0	0.5	no	no
YIL059C::chr9_1	YIL059C	YIL059C	0	0.5	no	no
YIL060W::chr9_1	YIL060W	YIL060W	0	0.5	no	no
YIL061C::chr9_1	YIL061C	SNP1	0	0.5	no	no
YIL062C::chr9_1	YIL062C	ARC15	0.0436278	0	no	no
YIL063C::chr9_1	YIL063C	YRB2	8.88178e-16	3.16712e-05	no	no
YIL064W::chr9_1	YIL064W	SEE1	0	0.5	no	no
YIL065C::chr9_1	YIL065C	FIS1	-0.0777447	1	no	no
YIL066C::chr9_1	YIL066C	RNR3	0	0.5	no	no
YIL067C::chr9_1	YIL067C	YIL067C	1.77636e-15	6.22096e-16	no	no
YIL068C::chr9_1	YIL068C	SEC6	0	0.5	no	no
YIL069C::chr9_1	YIL069C	RPS24B	0	0.5	no	no
YIL070C::chr9_1	YIL070C	MAM33	1.77636e-15	6.22096e-16	no	no
YIL071C::chr9_1	YIL071C	PCI8	0	0.5	no	no
YIL072W::chr9_1	YIL072W	HOP1	0	0.5	no	no
YIL073C::chr9_1	YIL073C	SPO22	0	0.5	no	no
YIL074C::chr9_1	YIL074C	SER33	-0.13466	1	no	no
YIL075C::chr9_1	YIL075C	RPN2	1.77636e-15	6.22096e-16	no	no
YIL078W::chr9_1	YIL078W	THS1	0	0.5	no	no
YIL084C::chr9_1	YIL084C	SDS3	0	0.5	no	no
YIL085C::chr9_1	YIL085C	KTR7	0	0.5	no	no
YIL086C::chr9_1	YIL086C	YIL086C	0	0.5	no	no
YIL087C::chr9_1	YIL087C	AIM19	0	0.5	no	no
YIL088C::chr9_1	YIL088C	AVT7	0	0.5	no	no
YIL090W::chr9_1	YIL090W	ICE2	-0.114867	1	no	no
YIL091C::chr9_1	YIL091C	UTP25	0	0.5	no	no
YIL092W::chr9_1	YIL092W	YIL092W	0	0.5	no	no
YIL093C::chr9_1	YIL093C	RSM25	0	0.5	no	no
YIL096C::chr9_1	YIL096C	YIL096C	0	0.5	no	no
YIL100W::chr9_2	YIL100W	YIL100W	0	0.5	no	no
YIL101C::chr9_2	YIL101C	XBP1	0.106432	0	no	no
YIL102C::chr9_2	YIL102C	YIL102C	0	0.5	no	no
YIL103W::chr9_2	YIL103W	DPH1	0	0.5	no	no
YIL104C::chr9_2	YIL104C	SHQ1	8.88178e-16	3.16712e-05	no	no
YIL108W::chr9_2	YIL108W	YIL108W	0.0432401	0	no	no
YIL111W::chr9_2	YIL111W	COX5B	0	0.5	no	no
YIL112W::chr9_2	YIL112W	HOS4	0.044312	0	yes	yes
YIL113W::chr9_2	YIL113W	SDP1	1.77636e-15	6.22096e-16	no	no
YIL118W::chr9_2	YIL118W	RHO3	0	0.5	no	no
YIL119C::chr9_2	YIL119C	RPI1	0	0.5	no	no
YIL120W::chr9_2	YIL120W	QDR1	0	0.5	no	no
YIL122W::chr9_2	YIL122W	POG1	0	0.5	no	no
YIL123W::chr9_2	YIL123W	SIM1	0	0.5	no	no
YIL124W::chr9_2	YIL124W	AYR1	0	0.5	no	no
YIL125W::chr9_2	YIL125W	KGD1	-0.0148607	1	no	no
YIL128W::chr9_2	YIL128W	MET18	0	0.5	no	no
YIL129C::chr9_2	YIL129C	TAO3	-0.114708	1	no	no
YIL130W::chr9_2	YIL130W	ASG1	0.0213063	0	no	no
YIL132C::chr9_2	YIL132C	CSM2	0	0.5	no	no
YIL133C::chr9_2	YIL133C	RPL16A	8.88178e-16	3.16712e-05	no	no
YIL135C::chr9_2	YIL135C	VHS2	0.0501916	0	no	no
YIL137C::chr9_2	YIL137C	TMA108	0.00434133	0	no	no
YIL138C::chr9_2	YIL138C	TPM2	0	0.5	no	no
YIL139C::chr9_2	YIL139C	REV7	0	0.5	no	no
YIL142W::chr9_2	YIL142W	CCT2	0	0.5	no	no
YIL144W::chr9_2	YIL144W	TID3	0.207584	0	no	no
YIL145C::chr9_2	YIL145C	PAN6	0	0.5	no	no
YIL148W::chr9_2	YIL148W	RPL40A	0	0.5	no	no
YIL152W::chr9_2	YIL152W	YIL152W	0	0.5	no	no
YIL153W::chr9_2	YIL153W	RRD1	8.88178e-16	3.16712e-05	no	no
YIL154C::chr9_2	YIL154C	IMP2'	0.150085	0	no	no
YIL155C::chr9_2	YIL155C	GUT2	0	0.5	no	no
YIL156W::chr9_2	YIL156W	UBP7	0	0.5	no	no
YIL157C::chr9_2	YIL157C	COA1	-0.317801	1	no	no
YIL160C::chr9_2	YIL160C	POT1	0	0.5	no	no
YIL161W::chr9_2	YIL161W	YIL161W	8.88178e-16	3.16712e-05	no	no
YIL162W::chr9_2	YIL162W	SUC2	0	0.5	no	no
YIL163C::chr9_2	YIL163C	YIL163C	0	0.5	no	no
YIL165C::chr9_2	YIL165C	YIL165C	0	0.5	no	no
YIL167W::chr9_2	YIL167W	SDL1	-0.543894	1	no	no
YIL170W::chr9_2	YIL170W	HXT12	0.290435	0	no	no
YIL171W::chr9_2	YIL171W	YIL171W	0	0.5	no	no
YIL173W::chr9_2	YIL173W	VTH1	0	0.5	no	no
YIR003W::chr9_2	YIR003W	AIM21	-0.0548287	1	no	no
YIR004W::chr9_2	YIR004W	DJP1	8.88178e-16	3.16712e-05	no	no
YIR005W::chr9_2	YIR005W	IST3	0	0.5	no	no
YIR006C::chr9_2	YIR006C	PAN1	0	0.5	no	no
YIR007W::chr9_2	YIR007W	YIR007W	0	0.5	no	no
YIR008C::chr9_2	YIR008C	PRI1	0	0.5	no	no
YIR009W::chr9_2	YIR009W	MSL1	0.0952162	0	no	no
YIR011C::chr9_2	YIR011C	STS1	0.0276494	0	no	no
YIR012W::chr9_2	YIR012W	SQT1	0	0.5	no	no
YIR013C::chr9_2	YIR013C	GAT4	0.313318	0	no	no
YIR014W::chr9_2	YIR014W	YIR014W	0.0630459	0	no	no
YIR015W::chr9_2	YIR015W	RPR2	0	0.5	no	no
YIR016W::chr9_2	YIR016W	YIR016W	-0.0955318	1	no	no
YIR024C::chr00_3	YIR024C	YIR024C	0	0.5	no	no
YIR030C::chr00_17b	YIR030C	DCG1	0.0735663	0	no	no
YIR031C::chr00_3	YIR031C	DAL7	0	0.5	no	no
YIR034C::chr00_3	YIR034C	LYS1	0.0373893	0	no	no
YIR039C::chr00_3	YIR039C	YPS6	-0.21288	1	no	no
YIR043C::chr00_17b	YIR043C	YIR043C	1.77636e-15	6.22096e-16	no	no
YIR044C::chr00_17b	YIR044C	YIR044C	1.77636e-15	6.22096e-16	no	no
YJL006C::chr00_13	YJL006C	CTK2	8.88178e-16	3.16712e-05	no	no
YJL009W::chr00_13	YJL009W	YJL009W	0.0847633	0	no	no
YJL018W::chr00_13	YJL019W	MPS3	0	0.5	no	no
YJL019W::chr00_13	YJL019W	MPS3	0	0.5	no	no
YJL020C::chr00_13	YJL020C	BBC1	0	0.5	no	no
YJL021C::chr00_13	YJL020C	BBC1	-0.145439	1	no	no
YJL022W::chr00_13	YJL022W	YJL022W	-0.0303196	1	no	no
YJL024C::chr00_13	YJL024C	APS3	0	0.5	no	no
YJL026W::chr00_13	YJL026W	RNR2	-0.37581	1	no	no
YJL028W::chr00_13	YJL028W	YJL028W	0	0.5	no	no
YJL032W::chr10_2	YJL032W	YJL032W	-0.0819889	1	no	no
YJL034W::chr10_2	YJL034W	KAR2	0.0628364	0	no	no
YJL035C::chr10_2	YJL035C	TAD2	-0.196219	1	no	no
YJL037W::chr10_2	YJL037W	IRC18	0.105524	0	no	no
YJL038C::chr10_2	YJL038C	LOH1	1.77636e-15	6.22096e-16	no	no
YJL041W::chr00_15	YJL041W	NSP1	0.372542	0	no	no
YJL044C::chr10_2	YJL044C	GYP6	0	0.5	no	no
YJL049W::chr10_2	YJL049W	YJL049W	0	0.5	no	no
YJL050W::chr10_2	YJL050W	MTR4	0	0.5	no	no
YJL051W::chr10_2	YJL051W	IRC8	-0.0327538	1	no	no
YJL052W::chr10_2	YJL052W	TDH1	0	0.5	no	no
YJL055W::chr10_2	YJL055W	YJL055W	0	0.5	no	no
YJL056C::chr10_2	YJL056C	ZAP1	0.0779296	0	no	no
YJL057C::chr10_2	YJL057C	IKS1	0.0150189	0	no	no
YJL058C::chr10_2	YJL058C	BIT61	-0.256135	1	no	no
YJL063C::chr10_2	YJL063C	MRPL8	0	0.5	no	no
YJL067W::chr10_2	YJL067W	YJL067W	0	0.5	no	no
YJL070C::chr00_15	YJL070C	YJL070C	0	0.5	no	no
YJL071W::chr10_2	YJL071W	ARG2	0	0.5	no	no
YJL072C::chr10_2	YJL072C	PSF2	0.189533	0	no	no
YJL073W::chr10_2	YJL073W	JEM1	0	0.5	no	no
YJL075C::chr10_2	YJL075C	APQ13	0	0.5	no	no
YJL076W::chr10_2	YJL076W	NET1	1.77636e-15	6.22096e-16	no	no
YJL077C::chr10_2	YJL077C	ICS3	0.179358	0	no	no
YJL078C::chr00_15	YJL078C	PRY3	0.0256156	0	no	no
YJL079C::chr10_2	YJL079C	PRY1	0	0.5	no	no
YJL080C::chr10_2	YJL080C	SCP160	8.88178e-16	3.16712e-05	no	no
YJL086C::chr10_2	YJL086C	YJL086C	0	0.5	no	no
YJL088W::chr10_2	YJL088W	ARG3	1.77636e-15	6.22096e-16	no	no
YJL090C::chr10_2	YJL090C	DPB11	-0.13222	1	no	no
YJL091C::chr10_2	YJL091C	GWT1	0	0.5	no	no
YJL094C::chr00_15	YJL094C	KHA1	0	0.5	no	no
YJL097W::chr00_15	YJL097W	PHS1	0	0.5	no	no
YJL099W::chr10_2	YJL099W	CHS6	0	0.5	no	no
YJL103C::chr00_18	YJL103C	GSM1	0	0.5	no	no
YJL104W::chr10_2	YJL104W	PAM16	0.122285	0	no	no
YJL105W::chr00_15	YJL105W	SET4	-0.12554	1	no	no
YJL108C::chr10_2	YJL108C	PRM10	-0.0266006	1	no	no
YJL109C::chr10_2	YJL109C	UTP10	0	0.5	no	no
YJL110C::chr10_2	YJL110C	GZF3	0	0.5	no	no
YJL111W::chr10_2	YJL111W	CCT7	1.71228	0	yes	yes
YJL112W::chr10_2	YJL112W	MDV1	0	0.5	no	no
YJL115W::chr10_2	YJL115W	ASF1	0	0.5	no	no
YJL116C::chr10_2	YJL116C	NCA3	0	0.5	no	no
YJL117W::chr10_2	YJL117W	PHO86	0.0667084	0	no	no
YJL118W::chr10_2	YJL118W	YJL118W	-0.0300069	1	no	no
YJL119C::chr10_2	YJL119C	YJL119C	0	0.5	no	no
YJL120W::chr10_2	YJL120W	YJL120W	0	0.5	no	no
YJL123C::chr10_2	YJL123C	MTC1	0	0.5	no	no
YJL124C::chr10_2	YJL124C	LSM1	0	0.5	no	no
YJL128C::chr00_15	YJL128C	PBS2	0.01466	0	no	no
YJL129C::chr00_14	YJL129C	TRK1	0	0.5	no	no
YJL129C::chr10_1	YJL129C	TRK1	0.0629398	0	no	no
YJL130C::chr10_1	YJL130C	URA2	0	0.5	no	no
YJL131C::chr10_1	YJL131C	AIM23	1.77636e-15	6.22096e-16	no	no
YJL132W::chr00_14	YJL132W	YJL132W	0	0.5	no	no
YJL132W::chr10_1	YJL132W	YJL132W	0	0.5	no	no
YJL133W::chr10_1	YJL133W	MRS3	0	0.5	no	no
YJL134W::chr10_1	YJL134W	LCB3	0	0.5	no	no
YJL138C::chr10_1	YJL138C	TIF2	-0.200651	1	no	no
YJL139C::chr00_14	YJL139C	YUR1	0	0.5	no	no
YJL141C::chr00_14	YJL141C	YAK1	-0.297003	1	no	no
YJL142C::chr10_1	YJL142C	IRC9	0	0.5	no	no
YJL146W::chr10_1	YJL146W	IDS2	0.0989312	0	no	no
YJL147C::chr10_1	YJL147C	YJL147C	0	0.5	no	no
YJL149W::chr10_1	YJL149W	DAS1	0	0.5	no	no
YJL152W::chr10_1	YJL152W	YJL152W	1.77636e-15	6.22096e-16	no	no
YJL153C::chr10_1	YJL153C	INO1	0	0.5	no	no
YJL154C::chr10_1	YJL154C	VPS35	0	0.5	no	no
YJL155C::chr10_1	YJL155C	FBP26	-0.128377	1	no	no
YJL157C::chr10_1	YJL157C	FAR1	0	0.5	no	no
YJL160C::chr00_14	YJL160C	YJL160C	0.0823924	0	no	no
YJL162C::chr10_1	YJL162C	JJJ2	-0.287125	1	no	no
YJL169W::chr10_1	YJL169W	YJL169W	0.0409786	0	no	no
YJL171C::chr10_1	YJL171C	YJL171C	0	0.5	no	no
YJL173C::chr10_1	YJL173C	RFA3	0	0.5	no	no
YJL174W::chr00_14	YJL174W	KRE9	0	0.5	no	no
YJL176C::chr10_1	YJL176C	SWI3	0	0.5	no	no
YJL177W::chr00_14	YJL177W	RPL17B	-0.147994	1	no	no
YJL178C::chr10_1	YJL178C	ATG27	0.0155579	0	no	no
YJL179W::chr10_1	YJL179W	PFD1	0	0.5	no	no
YJL180C::chr10_1	YJL180C	ATP12	-0.00404593	1	no	no
YJL181W::chr10_1	YJL181W	YJL181W	0	0.5	no	no
YJL182C::chr10_1	YJL182C	YJL182C	0	0.5	no	no
YJL183W::chr10_1	YJL183W	MNN11	-0.0452244	1	no	no
YJL184W::chr00_14	YJL184W	GON7	0.0511365	0	no	no
YJL184W::chr10_1	YJL184W	GON7	1.77636e-15	6.22096e-16	no	no
YJL185C::chr10_1	YJL185C	YJL185C	0	0.5	no	no
YJL186W::chr10_1	YJL186W	MNN5	0	0.5	no	no
YJL187C::chr10_1	YJL187C	SWE1	0.36391	0	no	no
YJL192C::chr10_1	YJL192C	SOP4	0	0.5	no	no
YJL195C::chr00_14	YJL195C	YJL195C	1.77636e-15	6.22096e-16	no	no
YJL196C::chr00_14	YJL196C	ELO1	0	0.5	no	no
YJL197W::chr10_1	YJL197W	UBP12	0	0.5	no	no
YJL198W::chr10_1	YJL198W	PHO90	0	0.5	no	no
YJL200C::chr00_14	YJL200C	ACO2	0	0.5	no	no
YJL202C::chr00_14	YJL202C	YJL202C	0.235285	0	no	no
YJL202C::chr10_1	YJL202C	YJL202C	0.25756	0	no	no
YJL204C::chr10_1	YJL204C	RCY1	0	0.5	no	no
YJL206C-A::chr10_1	YJL205C	NCE101	-0.0195937	1	no	no
YJL208C::chr10_1	YJL208C	NUC1	0	0.5	no	no
YJL210W::chr10_1	YJL210W	PEX2	8.88178e-16	3.16712e-05	no	no
YJL211C::chr10_1	YJL211C	YJL211C	-0.035276	1	no	no
YJL212C::chr10_1	YJL212C	OPT1	0	0.5	no	no
YJL215C::chr10_1	YJL215C	YJL215C	0.189583	0	no	no
YJL216C::chr10_1	YJL216C	IMA5	-0.175566	1	no	no
YJR014W::chr00_13	YJR014W	TMA22	0.148292	0	no	no
YJR015W::chr00_13	YJR015W	YJR015W	0	0.5	no	no
YJR016C::chr00_13	YJR016C	ILV3	0.142499	0	no	no
YJR020W::chr00_13	YJR020W	YJR020W	0	0.5	no	no
YJR021C::chr00_13	YJR021C	REC107	0.206327	0	no	no
YJR022W::chr00_17b	YJR022W	LSM8	0	0.5	no	no
YJR023C::chr00_13	YJR023C	YJR023C	-0.0202693	1	no	no
YJR025C::chr00_13	YJR025C	BNA1	-0.0287838	1	no	no
YJR026W::chr00_13	YJR026W	YJR026W	0	0.5	no	no
YJR031C::chr00_13	YJR031C	GEA1	1.77636e-15	6.22096e-16	no	no
YJR032W::chr00_13	YJR032W	CPR7	1.77636e-15	6.22096e-16	no	no
YJR035W::chr00_13	YJR035W	RAD26	0	0.5	no	no
YJR039W::chr00_13	YJR039W	YJR039W	0.016279	0	no	no
YJR041C::chr00_13	YJR041C	URB2	0	0.5	no	no
YJR042W::chr00_13	YJR042W	NUP85	0	0.5	no	no
YJR043C::chr00_13	YJR043C	POL32	0	0.5	no	no
YJR045C::chr00_13	YJR045C	SSC1	0	0.5	no	no
YJR047C::chr00_13	YJR047C	ANB1	0	0.5	no	no
YJR050W::chr00_13	YJR050W	ISY1	0	0.5	no	no
YJR052W::chr00_13	YJR052W	RAD7	-0.135948	1	no	no
YJR055W::chr00_13	YJR055W	HIT1	0.0285322	0	no	no
YJR056C::chr00_13	YJR056C	YJR056C	-0.04573	1	no	no
YJR060W::chr00_13	YJR060W	CBF1	8.88178e-16	3.16712e-05	no	no
YJR061W::chr00_13	YJR061W	YJR061W	0	0.5	no	no
YJR062C::chr00_13	YJR062C	NTA1	0	0.5	no	no
YJR066W::chr00_13	YJR066W	TOR1	1.77636e-15	6.22096e-16	no	no
YJR067C::chr00_12	YJR067C	YAE1	0	0.5	no	no
YJR068W::chr00_12	YJR068W	RFC2	0	0.5	no	no
YJR069C::chr00_12	YJR069C	HAM1	0	0.5	no	no
YJR070C::chr00_12	YJR070C	LIA1	0	0.5	no	no
YJR072C::chr10_4	YJR072C	NPA3	-0.0203032	1	no	no
YJR073C::chr10_4	YJR073C	OPI3	0.124125	0	no	no
YJR074W::chr00_12	YJR074W	MOG1	0	0.5	no	no
YJR075W::chr10_4	YJR075W	HOC1	-0.013823	1	no	no
YJR076C::chr10_4	YJR076C	CDC11	0	0.5	no	no
YJR077C::chr00_12	YJR077C	MIR1	0	0.5	no	no
YJR078W::chr10_4	YJR078W	BNA2	0	0.5	no	no
YJR079W::chr10_4	YJR079W	YJR079W	0	0.5	no	no
YJR080C::chr00_12	YJR080C	AIM24	0	0.5	no	no
YJR083C::chr10_4	YJR083C	ACF4	0	0.5	no	no
YJR084W::chr00_12	YJR084W	YJR084W	0	0.5	no	no
YJR087W::chr00_12	YJR087W	YJR087W	0	0.5	no	no
YJR088C::chr10_4	YJR088C	EMC2	0	0.5	no	no
YJR090C::chr00_12	YJR090C	GRR1	-0.321204	1	no	no
YJR091C::chr00_12	YJR091C	JSN1	0.112613	0	no	no
YJR092W::chr10_4	YJR092W	BUD4	0.144719	0	no	no
YJR093C::chr00_12	YJR093C	FIP1	0	0.5	no	no
YJR094C::chr00_12	YJR094C	IME1	0	0.5	no	no
YJR094W-A::chr00_12	YJR094W-A	RPL43B	0.348932	0	no	no
YJR095W::chr00_12	YJR095W	SFC1	0	0.5	no	no
YJR096W::chr00_12	YJR096W	YJR096W	0	0.5	no	no
YJR097W::chr00_12	YJR097W	JJJ3	0	0.5	no	no
YJR098C::chr00_12	YJR098C	YJR098C	0	0.5	no	no
YJR099W::chr00_12	YJR099W	YUH1	0	0.5	no	no
YJR100C::chr00_12	YJR100C	AIM25	0	0.5	no	no
YJR102C::chr10_4	YJR102C	VPS25	-0.234679	1	no	no
YJR103W::chr10_4	YJR103W	URA8	0	0.5	no	no
YJR104C::chr00_12	YJR104C	SOD1	0.13793	0	no	no
YJR105W::chr10_4	YJR105W	ADO1	0	0.5	no	no
YJR108W::chr10_4	YJR108W	ABM1	0	0.5	no	no
YJR109C::chr00_12	YJR109C	CPA2	0	0.5	no	no
YJR110W::chr10_4	YJR110W	YMR1	0	0.5	no	no
YJR111C::chr10_4	YJR111C	YJR111C	0	0.5	no	no
YJR112W::chr00_12	YJR112W	NNF1	0	0.5	no	no
YJR113C::chr00_12	YJR113C	RSM7	0	0.5	no	no
YJR115W::chr10_4	YJR115W	YJR115W	0	0.5	no	no
YJR116W::chr00_12	YJR116W	TDA4	1.77636e-15	6.22096e-16	no	no
YJR117W::chr00_12	YJR117W	STE24	0.154002	0	no	no
YJR118C::chr00_12	YJR118C	ILM1	0	0.5	no	no
YJR119C::chr00_12	YJR119C	JHD2	1.77636e-15	6.22096e-16	no	no
YJR120W::chr00_12	YJR120W	YJR120W	0	0.5	no	no
YJR121W::chr00_12	YJR121W	ATP2	0	0.5	no	no
YJR122W::chr00_12	YJR122W	IBA57	0	0.5	no	no
YJR123W::chr00_12	YJR123W	RPS5	0.209522	0	no	no
YJR124C::chr00_12	YJR124C	YJR124C	0	0.5	no	no
YJR125C::chr00_12	YJR125C	ENT3	0.242461	0	no	no
YJR126C::chr00_12	YJR126C	VPS70	0	0.5	no	no
YJR127C::chr10_4	YJR127C	RSF2	0	0.5	no	no
YJR128W::chr10_4	YJR128W	YJR128W	0	0.5	no	no
YJR129C::chr10_4	YJR129C	YJR129C	0	0.5	no	no
YJR130C::chr10_4	YJR130C	STR2	0.102918	0	no	no
YJR131W::chr00_12	YJR131W	MNS1	0	0.5	no	no
YJR133W::chr00_12	YJR133W	XPT1	-0.0546397	1	no	no
YJR134C::chr00_12	YJR134C	SGM1	0	0.5	no	no
YJR135C::chr10_4	YJR135C	MCM22	-0.777705	1	no	no
YJR137C::chr10_4	YJR137C	MET5	0	0.5	no	no
YJR139C::chr00_12	YJR139C	HOM6	0	0.5	no	no
YJR140C::chr00_12	YJR140C	HIR3	0	0.5	no	no
YJR141W::chr00_12	YJR141W	YJR141W	0	0.5	no	no
YJR142W::chr00_12	YJR142W	YJR142W	1.77636e-15	6.22096e-16	no	no
YJR144W::chr00_12	YJR144W	MGM101	0.0225907	0	no	no
YJR145C::chr00_12	YJR145C	RPS4A	0	0.5	no	no
YJR146W::chr10_4	YJR146W	YJR146W	0	0.5	no	no
YJR147W::chr10_4	YJR147W	HMS2	0	0.5	no	no
YJR148W::chr00_12	YJR148W	BAT2	-0.247561	1	no	no
YJR149W::chr10_4	YJR149W	YJR149W	0	0.5	no	no
YJR150C::chr00_12	YJR150C	DAN1	0	0.5	no	no
YJR152W::chr10_4	YJR152W	DAL5	-0.0823071	1	no	no
YJR153W::chr00_12	YJR153W	PGU1	0	0.5	no	no
YJR154W::chr10_4	YJR154W	YJR154W	0.179757	0	no	no
YKL001C::chr11_1	YKL001C	MET14	1.77636e-15	6.22096e-16	no	no
YKL004W::chr11_1	YKL004W	AUR1	0	0.5	no	no
YKL005C::chr00_12	YKL005C	BYE1	-0.0262902	1	no	no
YKL006C-A::chr11_1	YKL006C-A	SFT1	1.77636e-15	6.22096e-16	no	no
YKL006W::chr11_1	YKL006W	RPL14A	0.142994	0	no	no
YKL009W::chr11_1	YKL009W	MRT4	0.0540971	0	no	no
YKL010C::chr11_1	YKL010C	UFD4	1.77636e-15	6.22096e-16	no	no
YKL011C::chr11_1	YKL011C	CCE1	0	0.5	no	no
YKL012W::chr11_1	YKL012W	PRP40	0	0.5	no	no
YKL013C::chr11_1	YKL013C	ARC19	0	0.5	no	no
YKL014C::chr11_1	YKL014C	URB1	0	0.5	no	no
YKL015W::chr11_1	YKL015W	PUT3	0.107289	0	no	no
YKL016C::chr11_1	YKL016C	ATP7	-1.07759	1	no	no
YKL017C::chr11_1	YKL017C	HCS1	0	0.5	no	no
YKL018W::chr11_1	YKL018W	SWD2	0	0.5	no	no
YKL019W::chr11_1	YKL019W	RAM2	0	0.5	no	no
YKL021C::chr11_1	YKL021C	MAK11	-0.10298	1	no	no
YKL023W::chr11_1	YKL023W	YKL023W	0	0.5	no	no
YKL024C::chr11_1	YKL024C	URA6	1.77636e-15	6.22096e-16	no	no
YKL025C::chr11_1	YKL025C	PAN3	0	0.5	no	no
YKL026C::chr11_1	YKL026C	GPX1	0	0.5	no	no
YKL027W::chr11_1	YKL027W	YKL027W	0	0.5	no	no
YKL028W::chr11_1	YKL028W	TFA1	-0.0238578	1	no	no
YKL029C::chr11_1	YKL029C	MAE1	0.104206	0	no	no
YKL030W::chr00_12	YKL030W	YKL030W	8.88178e-16	3.16712e-05	no	no
YKL031W::chr11_1	YKL031W	YKL031W	0	0.5	no	no
YKL033W::chr11_1	YKL033W	TTI1	0.06489	0	no	no
YKL033W-A::chr00_3	YKL033W-A	YKL033W-A	0	0.5	no	no
YKL036C::chr11_1	YKL036C	YKL036C	0	0.5	no	no
YKL037W::chr11_1	YKL037W	AIM26	0	0.5	no	no
YKL038W::chr11_1	YKL038W	RGT1	0	0.5	no	no
YKL039W::chr11_1	YKL039W	PTM1	0	0.5	no	no
YKL040C::chr11_1	YKL040C	NFU1	0	0.5	no	no
YKL041W::chr11_1	YKL041W	VPS24	0	0.5	no	no
YKL043W::chr11_1	YKL043W	PHD1	-0.149964	1	no	no
YKL045W::chr11_1	YKL045W	PRI2	0.232139	0	no	no
YKL046C::chr11_1	YKL046C	DCW1	0	0.5	no	no
YKL048C::chr11_1	YKL048C	ELM1	0	0.5	no	no
YKL050C::chr11_1	YKL050C	YKL050C	0.117098	0	yes	yes
YKL052C::chr11_1	YKL052C	ASK1	0.572343	0	no	no
YKL053W::chr11_1	YKL053W	YKL053W	0	0.5	no	no
YKL054C::chr11_1	YKL054C	DEF1	0.100465	0	no	no
YKL055C::chr11_1	YKL055C	OAR1	1.77636e-15	6.22096e-16	no	no
YKL056C::chr11_1	YKL056C	TMA19	-0.228832	1	no	no
YKL060C::chr11_1	YKL060C	FBA1	0	0.5	no	no
YKL061W::chr11_1	YKL061W	BLI1	1.77636e-15	6.22096e-16	no	no
YKL067W::chr11_1	YKL067W	YNK1	0.0900682	0	no	no
YKL069W::chr11_1	YKL069W	YKL069W	0	0.5	no	no
YKL070W::chr11_1	YKL070W	YKL070W	0	0.5	no	no
YKL071W::chr11_1	YKL071W	YKL071W	0.0578915	0	no	no
YKL072W::chr11_1	YKL072W	STB6	0.0719989	0	no	no
YKL074C::chr11_1	YKL074C	MUD2	1.77636e-15	6.22096e-16	no	no
YKL075C::chr11_1	YKL075C	YKL075C	0	0.5	no	no
YKL076C::chr11_1	YKL076C	PSY1	0	0.5	no	no
YKL077W::chr11_1	YKL077W	YKL077W	1.77636e-15	6.22096e-16	no	no
YKL078W::chr11_1	YKL078W	DHR2	0.0141273	0	no	no
YKL079W::chr11_1	YKL079W	SMY1	0	0.5	no	no
YKL080W::chr11_1	YKL080W	VMA5	0.0802197	0	no	no
YKL082C::chr00_12	YKL082C	RRP14	0	0.5	no	no
YKL084W::chr11_1	YKL084W	HOT13	0.0150075	0	no	no
YKL086W::chr11_1	YKL086W	SRX1	-0.0437346	1	no	no
YKL092C::chr11_1	YKL092C	BUD2	0	0.5	no	no
YKL093W::chr11_1	YKL093W	MBR1	-0.0476665	1	no	no
YKL094W::chr11_1	YKL094W	YJU3	-0.160218	1	no	no
YKL095W::chr11_1	YKL095W	YJU2	0	0.5	no	no
YKL097C::chr11_2	YKL097C	YKL097C	-0.0700414	1	no	no
YKL098W::chr11_2	YKL098W	MTC2	0	0.5	no	no
YKL099C::chr11_2	YKL099C	UTP11	0	0.5	no	no
YKL100C::chr11_2	YKL100C	YKL100C	0	0.5	no	no
YKL101W::chr11_2	YKL101W	HSL1	0	0.5	no	no
YKL103C::chr11_2	YKL103C	APE1	0	0.5	no	no
YKL104C::chr11_2	YKL104C	GFA1	1.77636e-15	6.22096e-16	no	no
YKL105C::chr11_2	YKL105C	YKL105C	-0.134209	1	no	no
YKL106W::chr11_2	YKL106W	AAT1	0	0.5	no	no
YKL107W::chr11_2	YKL107W	YKL107W	-0.0262573	1	no	no
YKL109W::chr11_2	YKL109W	HAP4	0	0.5	no	no
YKL110C::chr11_2	YKL110C	KTI12	0	0.5	no	no
YKL115C::chr00_14	YKL115C	YKL115C	8.88178e-16	3.16712e-05	no	no
YKL116C::chr11_2	YKL116C	PRR1	-0.0966664	1	no	no
YKL117W::chr11_2	YKL117W	SBA1	0	0.5	no	no
YKL118W::chr11_2	YKL118W	YKL118W	8.88178e-16	3.16712e-05	no	no
YKL121W::chr11_2	YKL121W	DGR2	0	0.5	no	no
YKL122C::chr11_2	YKL122C	SRP21	0	0.5	no	no
YKL123W::chr11_2	YKL123W	YKL123W	0	0.5	no	no
YKL124W::chr11_2	YKL124W	SSH4	0	0.5	no	no
YKL125W::chr11_2	YKL125W	RRN3	0	0.5	no	no
YKL126W::chr11_2	YKL126W	YPK1	0	0.5	no	no
YKL128C::chr11_2	YKL128C	PMU1	0	0.5	no	no
YKL129C::chr11_2	YKL129C	MYO3	0	0.5	no	no
YKL130C::chr11_2	YKL130C	SHE2	0.0255674	0	no	no
YKL132C::chr11_2	YKL132C	RMA1	-0.103811	1	no	no
YKL136W::chr11_2	YKL136W	YKL136W	0	0.5	no	no
YKL138C::chr11_2	YKL138C	MRPL31	0	0.5	no	no
YKL139W::chr11_2	YKL139W	CTK1	0.0610551	0	no	no
YKL141W::chr11_2	YKL141W	SDH3	0	0.5	no	no
YKL143W::chr11_2	YKL143W	LTV1	0	0.5	no	no
YKL144C::chr11_2	YKL144C	RPC25	0	0.5	no	no
YKL145W::chr11_2	YKL145W	RPT1	0.0571092	0	no	no
YKL146W::chr11_2	YKL146W	AVT3	0.41854	0	no	no
YKL147C::chr11_2	YKL147C	YKL147C	-0.135323	1	no	no
YKL149C::chr11_2	YKL149C	DBR1	0	0.5	no	no
YKL150W::chr11_2	YKL150W	MCR1	-0.554031	1	no	no
YKL151C::chr11_2	YKL151C	YKL151C	0.0843906	0	no	no
YKL152C::chr11_2	YKL152C	GPM1	0	0.5	no	no
YKL154W::chr11_2	YKL154W	SRP102	-0.0984364	1	no	no
YKL155C::chr11_2	YKL155C	RSM22	-0.052021	1	no	no
YKL159C::chr11_2	YKL159C	RCN1	-0.0179216	1	no	no
YKL161C::chr11_2	YKL161C	KDX1	0	0.5	no	no
YKL162C-A::chr00_3	YKL162C-A	YKL162C-A	0.244673	0	yes	yes
YKL165C::chr11_2	YKL165C	MCD4	0.537132	0	no	no
YKL169C::chr11_2	YKL169C	YKL169C	0	0.5	no	no
YKL170W::chr11_2	YKL170W	MRPL38	0.323716	0	no	no
YKL171W::chr11_2	YKL171W	NNK1	0	0.5	no	no
YKL173W::chr11_2	YKL173W	SNU114	0	0.5	no	no
YKL176C::chr11_2	YKL176C	LST4	8.88178e-16	3.16712e-05	no	no
YKL179C::chr11_2	YKL179C	COY1	0	0.5	no	no
YKL180W::chr11_2	YKL180W	RPL17A	0.101805	0	no	no
YKL181W::chr11_2	YKL181W	PRS1	0	0.5	no	no
YKL182W::chr11_2	YKL182W	FAS1	0	0.5	no	no
YKL184W::chr11_2	YKL184W	SPE1	0	0.5	no	no
YKL185W::chr11_2	YKL185W	ASH1	-0.0865592	1	no	no
YKL186C::chr11_2	YKL186C	MTR2	0	0.5	no	no
YKL189W::chr11_2	YKL189W	HYM1	-0.217716	1	no	no
YKL196C::chr11_3	YKL196C	YKT6	1.77636e-15	6.22096e-16	no	no
YKL197C::chr11_3	YKL197C	PEX1	0	0.5	no	no
YKL201C::chr00_14	YKL201C	MNN4	0	0.5	no	no
YKL202W::chr00_14	YKL202W	YKL202W	0	0.5	no	no
YKL203C::chr11_3	YKL203C	TOR2	0	0.5	no	no
YKL204W::chr00_14	YKL204W	EAP1	0	0.5	no	no
YKL209C::chr00_14	YKL209C	STE6	0	0.5	no	no
YKL211C::chr11_3	YKL211C	TRP3	0	0.5	no	no
YKL212W::chr11_3	YKL212W	SAC1	0	0.5	no	no
YKL213C::chr11_3	YKL213C	DOA1	-0.0322477	1	no	no
YKL214C::chr11_3	YKL214C	YRA2	-0.0929703	1	no	no
YKL217W::chr11_3	YKL217W	JEN1	-0.0300397	1	no	no
YKL218C::chr11_3	YKL218C	SRY1	-0.370613	1	no	no
YKL222C::chr11_3	YKL222C	YKL222C	0	0.5	no	no
YKR001C::chr11_3	YKR001C	VPS1	0	0.5	no	no
YKR002W::chr11_3	YKR002W	PAP1	0	0.5	no	no
YKR003W::chr11_3	YKR003W	OSH6	0	0.5	no	no
YKR005C::chr11_3	YKR005C	YKR005C	0.124814	0	no	no
YKR009C::chr11_3	YKR009C	FOX2	0.184064	0	no	no
YKR011C::chr11_3	YKR011C	YKR011C	1.77636e-15	6.22096e-16	no	no
YKR012C::chr11_3	YKR012C	YKR012C	0	0.5	no	no
YKR014C::chr11_3	YKR014C	YPT52	0	0.5	no	no
YKR015C::chr11_3	YKR015C	YKR015C	0.184886	0	no	no
YKR022C::chr11_3	YKR022C	NTR2	0.0859359	0	no	no
YKR024C::chr11_3	YKR024C	DBP7	0	0.5	no	no
YKR025W::chr11_3	YKR025W	RPC37	0	0.5	no	no
YKR026C::chr11_3	YKR026C	GCN3	0	0.5	no	no
YKR027W::chr00_14	YKR027W	BCH2	-0.0414023	1	no	no
YKR030W::chr11_3	YKR030W	GMH1	0.027364	0	no	no
YKR032W::chr11_3	YKR032W	YKR032W	0	0.5	no	no
YKR033C::chr11_3	YKR033C	YKR033C	0	0.5	no	no
YKR034W::chr00_14	YKR034W	DAL80	0	0.5	no	no
YKR038C::chr00_14	YKR038C	KAE1	0	0.5	no	no
YKR039W::chr00_14	YKR039W	GAP1	0	0.5	no	no
YKR040C::chr00_14	YKR040C	YKR040C	0	0.5	no	no
YKR042W::chr11_3	YKR042W	UTH1	0	0.5	no	no
YKR043C::chr11_3	YKR043C	SHB17	0	0.5	no	no
YKR045C::chr11_3	YKR045C	YKR045C	0.121736	0	no	no
YKR047W::chr11_3	YKR047W	YKR047W	0	0.5	no	no
YKR048C::chr11_3	YKR048C	NAP1	-0.129266	1	no	no
YKR051W::chr11_3	YKR051W	YKR051W	-0.132131	1	no	no
YKR056W::chr11_3	YKR056W	TRM2	0	0.5	no	no
YKR057W::chr11_3	YKR057W	RPS21A	0.270217	0	no	no
YKR058W::chr11_3	YKR058W	GLG1	0	0.5	no	no
YKR061W::chr11_3	YKR061W	KTR2	0	0.5	no	no
YKR063C::chr11_3	YKR063C	LAS1	0.041623	0	no	no
YKR064W::chr11_3	YKR064W	OAF3	0.112907	0	no	no
YKR065C::chr11_3	YKR065C	PAM17	0.0312961	0	no	no
YKR068C::chr00_3	YKR068C	BET3	8.88178e-16	3.16712e-05	no	no
YKR073C::chr00_3	YKR073C	YKR073C	0	0.5	no	no
YKR074W::chr00_3	YKR074W	AIM29	-0.101586	1	no	no
YKR075C::chr00_3	YKR075C	YKR075C	0	0.5	no	no
YKR078W::chr00_3	YKR078W	YKR078W	-0.0755046	1	no	no
YKR082W::chr00_3	YKR082W	NUP133	8.88178e-16	3.16712e-05	no	no
YKR084C::chr00_3	YKR084C	HBS1	0	0.5	no	no
YKR088C::chr00_4	YKR088C	TVP38	0	0.5	no	no
YKR089C::chr00_4	YKR089C	TGL4	-0.128925	1	no	no
YKR090W::chr00_4	YKR090W	PXL1	0	0.5	no	no
YKR092C::chr00_4	YKR092C	SRP40	0.104415	0	no	no
YKR093W::chr00_4	YKR093W	PTR2	0.0733119	0	no	no
YKR094C::chr00_15	YKR094C	RPL40B	0	0.5	no	no
YKR096W::chr00_15	YKR096W	YKR096W	0	0.5	no	no
YKR098C::chr00_4	YKR098C	UBP11	-0.0740826	1	no	no
YKR100C::chr00_4	YKR100C	SKG1	0	0.5	no	no
YKR104W::chr00_4	YKR104W	YKR104W	0	0.5	no	no
YKR105C::chr00_4	YKR105C	VBA5	8.88178e-16	3.16712e-05	no	no
YKR106W::chr00_17b	YKR106W	GEX2	0	0.5	no	no
YLL005C::chr12_1	YLL005C	SPO75	0	0.5	no	no
YLL006W::chr12_1	YLL006W	MMM1	0	0.5	no	no
YLL007C::chr00_10	YLL007C	YLL007C	0	0.5	no	no
YLL010C::chr12_1	YLL010C	PSR1	0	0.5	no	no
YLL012W::chr12_1	YLL012W	YEH1	0	0.5	no	no
YLL013C::chr12_1	YLL013C	PUF3	-0.114127	1	no	no
YLL014W::chr12_1	YLL014W	EMC6	-0.178916	1	no	no
YLL015W::chr12_1	YLL015W	BPT1	0	0.5	no	no
YLL016W::chr12_1	YLL016W	SDC25	0.0183009	0	no	no
YLL018C-A::chr00_4	YLL018C-A	COX19	-0.549106	1	no	no
YLL019C::chr12_1	YLL019C	KNS1	0.207923	0	no	no
YLL023C::chr12_1	YLL023C	POM33	0	0.5	no	no
YLL025W::chr12_1	YLL025W	PAU17	1.77636e-15	6.22096e-16	no	no
YLL026W::chr12_1	YLL026W	HSP104	0	0.5	no	no
YLL027W::chr12_1	YLL027W	ISA1	0	0.5	no	no
YLL028W::chr12_1	YLL028W	TPO1	0	0.5	no	no
YLL029W::chr12_1	YLL029W	FRA1	0	0.5	no	no
YLL030C::chr00_8	YLL030C	RRT7	0	0.5	no	no
YLL031C::chr12_1	YLL031C	GPI13	0	0.5	no	no
YLL032C::chr12_1	YLL032C	YLL032C	0	0.5	no	no
YLL035W::chr12_1	YLL035W	GRC3	0	0.5	no	no
YLL036C::chr12_1	YLL036C	PRP19	0	0.5	no	no
YLL037W::chr12_1	YLL037W	YLL037W	0	0.5	no	no
YLL040C::chr12_1	YLL040C	VPS13	0	0.5	no	no
YLL042C::chr12_1	YLL042C	ATG10	0	0.5	no	no
YLL043W::chr12_1	YLL043W	FPS1	-0.134271	1	no	no
YLL045C::chr12_1	YLL045C	RPL8B	0.0499657	0	no	no
YLL046C::chr12_1	YLL046C	RNP1	0	0.5	no	no
YLL049W::chr00_8	YLL049W	LDB18	0	0.5	no	no
YLL051C::chr12_1	YLL051C	FRE6	0	0.5	no	no
YLL052C::chr12_1	YLL052C	AQY2	-0.0890133	1	no	no
YLL054C::chr12_1	YLL054C	YLL054C	0	0.5	no	no
YLL056C::chr12_1	YLL056C	YLL056C	1.77636e-15	6.22096e-16	no	no
YLL058W::chr12_1	YLL058W	YLL058W	0	0.5	no	no
YLL059C::chr00_8	YLL059C	YLL059C	0	0.5	no	no
YLL061W::chr12_1	YLL061W	MMP1	0	0.5	no	no
YLR006C::chr12_1	YLR006C	SSK1	0	0.5	no	no
YLR008C::chr12_1	YLR008C	PAM18	0	0.5	no	no
YLR011W::chr12_1	YLR011W	LOT6	-0.158962	1	no	no
YLR012C::chr12_1	YLR012C	YLR012C	0	0.5	no	no
YLR013W::chr12_1	YLR013W	GAT3	0	0.5	no	no
YLR015W::chr12_1	YLR015W	BRE2	0	0.5	no	no
YLR016C::chr12_1	YLR016C	PML1	0	0.5	no	no
YLR017W::chr12_1	YLR017W	MEU1	0	0.5	no	no
YLR018C::chr12_1	YLR018C	POM34	1.77636e-15	6.22096e-16	no	no
YLR019W::chr12_1	YLR019W	PSR2	0.0241486	0	no	no
YLR020C::chr12_1	YLR020C	YEH2	0	0.5	no	no
YLR021W::chr12_1	YLR021W	IRC25	0	0.5	no	no
YLR022C::chr12_1	YLR022C	SDO1	-0.206251	1	no	no
YLR024C::chr12_1	YLR024C	UBR2	0	0.5	no	no
YLR025W::chr12_1	YLR025W	SNF7	0	0.5	no	no
YLR026C::chr12_1	YLR026C	SED5	1.77636e-15	6.22096e-16	no	no
YLR027C::chr12_1	YLR027C	AAT2	0	0.5	no	no
YLR038C::chr00_8	YLR038C	COX12	0	0.5	no	no
YLR040C::chr00_8	YLR040C	YLR040C	0	0.5	no	no
YLR051C::chr12_2	YLR051C	FCF2	0	0.5	no	no
YLR053C::chr12_2	YLR053C	YLR053C	0	0.5	no	no
YLR055C::chr12_2	YLR055C	SPT8	0	0.5	no	no
YLR056W::chr12_2	YLR056W	ERG3	8.88178e-16	3.16712e-05	no	no
YLR057W::chr12_2	YLR057W	MNL2	0	0.5	no	no
YLR063W::chr12_2	YLR063W	YLR063W	0	0.5	no	no
YLR064W::chr12_2	YLR064W	PER33	0.207178	0	no	no
YLR065C::chr12_2	YLR065C	ENV10	8.88178e-16	3.16712e-05	no	no
YLR069C::chr12_2	YLR069C	MEF1	0	0.5	no	no
YLR074C::chr12_2	YLR074C	BUD20	0	0.5	no	no
YLR077W::chr12_2	YLR077W	FMP25	0	0.5	no	no
YLR078C::chr12_2	YLR078C	BOS1	0	0.5	no	no
YLR085C::chr12_2	YLR085C	ARP6	0.212018	0	no	no
YLR090W::chr12_2	YLR090W	XDJ1	0	0.5	no	no
YLR091W::chr12_2	YLR091W	GEP5	0	0.5	no	no
YLR097C::chr12_2	YLR097C	HRT3	0	0.5	no	no
YLR098C::chr12_2	YLR098C	CHA4	0	0.5	no	no
YLR100W::chr12_2	YLR100W	ERG27	8.88178e-16	3.16712e-05	no	no
YLR102C::chr12_2	YLR102C	APC9	0	0.5	no	no
YLR105C::chr12_2	YLR105C	SEN2	0	0.5	no	no
YLR113W::chr12_2	YLR113W	HOG1	0	0.5	no	no
YLR120C::chr12_2	YLR120C	YPS1	0	0.5	no	no
YLR124W::chr12_2	YLR124W	YLR124W	0	0.5	no	no
YLR136C::chr12_3	YLR136C	TIS11	0	0.5	no	no
YLR146C::chr00_12	YLR146C	SPE4	0	0.5	no	no
YLR153C::chr00_12	YLR153C	ACS2	0	0.5	no	no
YLR186W::chr00_11	YLR186W	EMG1	0	0.5	no	no
YLR191W::chr12_3	YLR191W	PEX13	0	0.5	no	no
YLR192C::chr00_11	YLR192C	HCR1	0	0.5	no	no
YLR194C::chr12_3	YLR194C	YLR194C	0	0.5	no	no
YLR203C::chr12_3	YLR203C	MSS51	0	0.5	no	no
YLR204W::chr12_3	YLR204W	QRI5	0	0.5	no	no
YLR207W::chr12_3	YLR207W	HRD3	0	0.5	no	no
YLR209C::chr12_3	YLR209C	PNP1	0	0.5	no	no
YLR215C::chr00_11	YLR215C	CDC123	0	0.5	no	no
YLR236C::chr12_4	YLR236C	YLR236C	0.137646	0	yes	yes
YLR237W::chr00_11	YLR237W	THI7	0	0.5	no	no
YLR244C::chr12_4	YLR244C	MAP1	0	0.5	no	no
YLR246W::chr00_11	YLR246W	ERF2	0	0.5	no	no
YLR250W::chr12_4	YLR250W	SSP120	1.77636e-15	6.22096e-16	no	no
YLR252W::chr12_4	YLR252W	YLR252W	0	0.5	no	no
YLR253W::chr12_4	YLR253W	YLR253W	0	0.5	no	no
YLR257W::chr12_4	YLR257W	YLR257W	0	0.5	no	no
YLR263W::chr12_4	YLR263W	RED1	0	0.5	no	no
YLR271W::chr12_4	YLR271W	YLR271W	0	0.5	no	no
YLR272C::chr12_4	YLR272C	YCS4	0	0.5	no	no
YLR273C::chr12_4	YLR273C	PIG1	0.0429134	0	no	no
YLR274W::chr12_4	YLR274W	MCM5	0	0.5	no	no
YLR277C::chr12_4	YLR277C	YSH1	0.074337	0	no	no
YLR278C::chr12_4	YLR278C	YLR278C	-0.0474496	1	no	no
YLR279W::chr12_4	YLR279W	YLR279W	-0.221981	1	no	no
YLR287C::chr12_4	YLR287C	YLR287C	0	0.5	no	no
YLR289W::chr12_4	YLR289W	GUF1	0.0734889	0	no	no
YLR292C::chr12_4	YLR292C	SEC72	0	0.5	no	no
YLR295C::chr12_4	YLR295C	ATP14	0	0.5	no	no
YLR297W::chr12_4	YLR297W	YLR297W	0	0.5	no	no
YLR299W::chr12_4	YLR299W	ECM38	1.77636e-15	6.22096e-16	no	no
YLR305C::chr12_4	YLR305C	STT4	0	0.5	no	no
YLR308W::chr12_4	YLR308W	CDA2	-0.154602	1	no	no
YLR310C::chr12_4	YLR310C	CDC25	0	0.5	no	no
YLR313C::chr12_4	YLR313C	SPH1	0	0.5	no	no
YLR316C::chr12_4	YLR316C	TAD3	-0.0671897	1	no	no
YLR317W::chr12_4	YLR317W	YLR317W	0.174042	0	no	no
YLR318W::chr12_4	YLR318W	EST2	1.77636e-15	6.22096e-16	no	no
YLR319C::chr12_4	YLR319C	BUD6	0	0.5	no	no
YLR320W::chr12_4	YLR320W	MMS22	0	0.5	no	no
YLR322W::chr12_4	YLR322W	VPS65	0.224729	0	no	no
YLR323C::chr12_4	YLR323C	CWC24	0	0.5	no	no
YLR325C::chr12_5	YLR325C	RPL38	0	0.5	no	no
YLR328W::chr12_5	YLR328W	NMA1	0	0.5	no	no
YLR334C::chr00_11	YLR334C	YLR334C	0	0.5	no	no
YLR337C::chr12_5	YLR337C	VRP1	0	0.5	no	no
YLR340W::chr12_5	YLR340W	RPP0	0	0.5	no	no
YLR343W::chr00_12	YLR343W	GAS2	0.360636	0	no	no
YLR345W::chr12_5	YLR345W	YLR345W	0	0.5	no	no
YLR347C::chr12_5	YLR347C	KAP95	-0.0728741	1	no	no
YLR348C::chr12_5	YLR348C	DIC1	1.77636e-15	6.22096e-16	no	no
YLR350W::chr12_5	YLR350W	ORM2	0	0.5	no	no
YLR352W::chr12_5	YLR352W	YLR352W	-0.0878405	1	no	no
YLR353W::chr12_5	YLR353W	BUD8	0	0.5	no	no
YLR355C::chr12_5	YLR355C	ILV5	0	0.5	no	no
YLR357W::chr12_5	YLR357W	RSC2	0	0.5	no	no
YLR358C::chr00_11	YLR358C	YLR358C	-0.194935	1	no	no
YLR359W::chr12_5	YLR359W	ADE13	0	0.5	no	no
YLR361C::chr00_11	YLR361C	DCR2	0	0.5	no	no
YLR367W::chr12_5	YLR367W	RPS22B	1.77636e-15	6.22096e-16	no	no
YLR370C::chr00_11	YLR370C	ARC18	0	0.5	no	no
YLR374C::chr12_5	YLR374C	YLR374C	0	0.5	no	no
YLR375W::chr12_5	YLR375W	STP3	-0.11758	1	no	no
YLR376C::chr12_5	YLR376C	PSY3	-0.103184	1	no	no
YLR378C::chr12_5	YLR378C	SEC61	0	0.5	no	no
YLR379W::chr12_5	YLR379W	YLR379W	0	0.5	no	no
YLR380W::chr12_5	YLR380W	CSR1	0	0.5	no	no
YLR384C::chr12_5	YLR384C	IKI3	0	0.5	no	no
YLR385C::chr12_5	YLR385C	SWC7	8.88178e-16	3.16712e-05	no	no
YLR387C::chr12_5	YLR387C	REH1	0	0.5	no	no
YLR388W::chr12_5	YLR388W	RPS29A	0.464284	0	no	no
YLR389C::chr12_5	YLR389C	STE23	0	0.5	no	no
YLR390W::chr12_5	YLR390W	ECM19	0.0860784	0	no	no
YLR391W::chr12_5	YLR390W-A	CCW14	0	0.5	no	no
YLR392C::chr12_5	YLR392C	ART10	-0.0941862	1	no	no
YLR394W::chr00_11	YLR394W	CST9	0	0.5	no	no
YLR395C::chr12_5	YLR395C	COX8	0	0.5	no	no
YLR396C::chr12_5	YLR396C	VPS33	0	0.5	no	no
YLR397C::chr12_5	YLR397C	AFG2	0	0.5	no	no
YLR398C::chr12_5	YLR398C	SKI2	0	0.5	no	no
YLR399C::chr12_5	YLR399C	BDF1	0	0.5	no	no
YLR400W::chr12_5	YLR400W	YLR400W	-0.0657747	1	no	no
YLR403W::chr12_5	YLR403W	SFP1	0	0.5	no	no
YLR404W::chr12_5	YLR404W	FLD1	0	0.5	no	no
YLR405W::chr12_5	YLR405W	DUS4	0	0.5	no	no
YLR406C::chr00_11	YLR406C	RPL31B	-0.00343746	1	no	no
YLR408C::chr12_5	YLR408C	BLS1	0	0.5	no	no
YLR409C::chr12_5	YLR409C	UTP21	0	0.5	no	no
YLR410W::chr12_5	YLR410W	VIP1	0	0.5	no	no
YLR414C::chr12_5	YLR414C	PUN1	0	0.5	no	no
YLR417W::chr12_5	YLR417W	VPS36	0	0.5	no	no
YLR422W::chr00_4	YLR422W	YLR422W	-0.0396265	1	no	no
YLR423C::chr00_4	YLR423C	ATG17	0	0.5	no	no
YLR424W::chr00_4	YLR424W	SPP382	8.88178e-16	3.16712e-05	no	no
YLR426W::chr00_4	YLR426W	TDA5	0.0114235	0	no	no
YLR427W::chr00_4	YLR427W	MAG2	-0.0766359	1	no	no
YLR433C::chr00_4	YLR433C	CNA1	0	0.5	no	no
YLR434C::chr00_4	YLR434C	YLR434C	0	0.5	no	no
YLR438C-A::chr00_4	YLR438C-A	LSM3	0	0.5	no	no
YLR438W::chr00_4	YLR438W	CAR2	0.0410745	0	no	no
YLR439W::chr00_15	YLR439W	MRPL4	0	0.5	no	no
YLR442C::chr00_4/chr00_15	YLR442C	SIR3	0.0418676	0	no	no
YLR447C::chr00_4	YLR447C	VMA6	0	0.5	no	no
YLR448W::chr00_4	YLR448W	RPL6B	0.110784	0	no	no
YLR457C::chr00_15	YLR457C	NBP1	8.88178e-16	3.16712e-05	no	no
YLR458W::chr00_4	YLR458W	YLR458W	0	0.5	no	no
YLR459W::chr00_4	YLR459W	GAB1	0	0.5	no	no
YLR461W::chr00_4	YLR461W	PAU4	0.0075852	0	no	no
YML015C::chr00_11	YML015C	TAF11	1.77636e-15	6.22096e-16	no	no
YML036W::chr00_11	YML036W	CGI121	0	0.5	no	no
YML038C::chr00_11	YML038C	YMD8	-0.128083	1	no	no
YML042W::chr00_11	YML042W	CAT2	0	0.5	no	no
YML069W::chr00_15	YML069W	POB3	0.239473	0	no	no
YML072C::chr00_12	YML072C	TCB3	0	0.5	no	no
YML073C::chr00_18	YML073C	RPL6A	0.322227	0	no	no
YML075C::chr00_11	YML075C	HMG1	0.00762616	0	no	no
YML076C::chr00_11	YML076C	WAR1	8.88178e-16	3.16712e-05	no	no
YML085C::chr00_12	YML085C	TUB1	0.254136	0	no	no
YML086C::chr00_11	YML086C	ALO1	0	0.5	no	no
YML093W::chr00_9	YML093W	UTP14	-0.162369	1	no	no
YML094W::chr00_9	YML094W	GIM5	0	0.5	no	no
YML095C-A::chr00_9	YML094C-A	YML094C-A	0	0.5	no	no
YML096W::chr00_9	YML096W	YML096W	0	0.5	no	no
YML099C::chr00_9	YML099C	ARG81	-0.251339	1	no	no
YML100W::chr00_9	YML100W	TSL1	0	0.5	no	no
YML105C::chr00_9	YML105C	SEC65	0	0.5	no	no
YML114C::chr00_9	YML114C	TAF8	0.00933093	0	no	no
YML116W::chr00_9	YML116W	ATR1	1.77636e-15	6.22096e-16	no	no
YML117W::chr00_9	YML117W	NAB6	0.0132416	0	no	no
YML118W::chr00_9	YML118W	NGL3	-0.0967425	1	no	no
YML124C::chr00_9	YML124C	TUB3	0	0.5	no	no
YML126C::chr00_9	YML126C	ERG13	0	0.5	no	no
YML129C::chr00_9	YML129C	COX14	0	0.5	no	no
YMR004W::chr00_9	YMR004W	MVP1	8.88178e-16	3.16712e-05	no	no
YMR037C::chr00_15	YMR037C	MSN2	0	0.5	no	no
YMR052W::chr00_5	YMR052W	FAR3	0	0.5	no	no
YMR053C::chr00_5	YMR053C	STB2	0.0243711	0	no	no
[truncated: 833 more rows]

## Sheet: flight
Strain	ORF	Gene	Log2ratio, 21G	P, 21G	Drops out, 21G	Significant, 21G
YAL001C::chr1_1	YAL001C	TFC3	-0.352459	0.797624	no	no
YAL003W::chr1_1	YAL003W	EFB1	0.338298	0.285558	no	no
YAL005C::chr1_1	YAL005C	SSA1	-0.136482	0.653787	no	no
YAL007C::chr1_1	YAL007C	ERP2	0.455655	0.210644	no	no
YAL008W::chr1_1	YAL008W	FUN14	0.601332	0.135807	no	no
YAL009W::chr1_1	YAL009W	SPO7	0.133607	0.439722	no	no
YAL010C::chr1_1	YAL010C	MDM10	0.445907	0.216391	no	no
YAL011W::chr1_1	YAL011W	SWC3	0.516296	0.176948	no	no
YAL012W::chr00_12	YAL012W	CYS3	0.0308693	0.522523	no	no
YAL013W::chr1_1	YAL013W	DEP1	-0.301112	0.767039	no	no
YAL014C::chr1_1	YAL014C	SYN8	0.435853	0.222413	no	no
YAL015C::chr1_1	YAL015C	NTG1	-0.449757	0.848566	no	no
YAL016W::chr00_12	YAL016W	TPD3	0.311709	0.304139	no	no
YAL017W::chr1_1	YAL017W	PSK1	0.421139	0.231396	no	no
YAL018C::chr1_1	YAL018C	YAL018C	-0.753625	0.950117	no	no
YAL019W::chr1_1	YAL019W	FUN30	0.890839	0.0459041	no	no
YAL020C::chr1_1	YAL020C	ATS1	-0.586515	0.904461	no	no
YAL021C::chr1_1	YAL021C	CCR4	-0.509699	0.875289	no	no
YAL022C::chr1_1	YAL022C	FUN26	0.56069	0.154575	no	no
YAL023C::chr1_1	YAL023C	PMT2	-0.0380781	0.577767	no	no
YAL024C::chr00_17a	YAL024C	LTE1	0.476495	0.198661	no	no
YAL025C::chr1_1	YAL025C	MAK16	0.530943	0.169351	no	no
YAL026C::chr1_1	YAL026C	DRS2	-0.223945	0.716602	no	no
YAL027W::chr1_1	YAL027W	SAW1	-0.776486	0.954706	no	no
YAL028W::chr1_1	YAL028W	FRT2	-0.0332611	0.573944	no	no
YAL029C::chr1_1	YAL029C	MYO4	0.49768	0.18691	no	no
YAL030W::chr1_1	YAL030W	SNC1	0.121067	0.44976	no	no
YAL031C::chr1_1	YAL031C	GIP4	0.138625	0.435715	no	no
YAL032C::chr1_1	YAL032C	PRP45	-0.267726	0.745849	no	no
YAL033W::chr1_1	YAL033W	POP5	-0.327585	0.783118	no	no
YAL034C::chr1_1	YAL034C	FUN19	0.516296	0.176948	no	no
YAL034W-A::chr1_1	YAL034W-A	MTW1	-1.36506	0.998042	no	no
YAL035C-A::chr1_1	YAL034C-B	YAL034C-B	0.168373	0.412112	no	no
YAL035W::chr1_1	YAL035W	FUN12	-0.620123	0.91551	no	no
YAL036C::chr1_1	YAL036C	RBG1	-0.521943	0.880315	no	no
YAL037W::chr1_1	YAL037W	YAL037W	0.88458	0.0471387	no	no
YAL038W::chr1_1	YAL038W	CDC19	0.0428419	0.512855	no	no
YAL039C::chr1_1	YAL039C	CYC3	0.604472	0.134425	no	no
YAL040C::chr1_1	YAL040C	CLN3	0.627804	0.124457	no	no
YAL041W::chr1_1	YAL041W	CDC24	-0.661702	0.927819	no	no
YAL042W::chr1_1	YAL042W	ERV46	0.238762	0.357655	no	no
YAL045C::chr1_1	YAL045C	YAL045C	-0.246665	0.73198	no	no
YAL046C::chr1_1	YAL046C	AIM1	-0.379115	0.812507	no	no
YAL047C::chr00_12	YAL047C	SPC72	0.335482	0.2875	yes	yes
YAL048C::chr1_1	YAL048C	GEM1	0.28385	0.324163	no	no
YAL049C::chr1_1	YAL049C	AIM2	-0.0899392	0.618393	no	no
YAL051W::chr1_1	YAL051W	OAF1	-0.228963	0.720035	no	no
YAL053W::chr1_1	YAL053W	FLC2	0.457879	0.209345	no	no
YAL054C::chr00_12	YAL054C	ACS1	0.0752634	0.486653	no	no
YAL055W::chr1_1	YAL055W	PEX22	0.405412	0.241218	no	no
YAL056W::chr1_1	YAL056W	GPB2	0.0903703	0.474457	no	no
YAL058C-A::chr00_12	YAL056C-A	YAL056C-A	-0.036447	0.576473	no	no
YAL058W::chr1_1	YAL058W	CNE1	0.113925	0.455493	no	no
YAL059W::chr1_1	YAL059W	ECM1	0.448481	0.214865	no	no
YAL060W::chr1_1	YAL060W	BDH1	-0.00565661	0.551912	no	no
YAL061W::chr1_1	YAL061W	BDH2	-0.189179	0.692285	no	no
YAL062W::chr1_1	YAL062W	GDH3	0.0859106	0.478055	no	no
YAL064C-A::chr00_1	YAL064C-A	TDA8	-0.257892	0.73942	no	no
YAL065C::chr1_1	YAL065C	YAL065C	-0.542121	0.888283	no	no
YAL066W::chr1_1	YAL066W	YAL066W	-0.246665	0.73198	no	no
YAL067C::chr1_1	YAL067C	SEO1	0.28385	0.324163	no	no
YAL068C::chr1_1	YAL068C	PAU8	0.361018	0.270123	no	no
YAR002C-A::chr00_16a	YAR002C-A	ERP1	-0.870101	0.970081	no	no
YAR003W::chr1_1	YAR003W	SWD1	-0.157203	0.669143	no	no
YAR007C::chr1_1	YAR007C	RFA1	0.0130946	0.53685	no	no
YAR008W::chr1_1	YAR008W	SEN34	0.101259	0.465681	no	no
YAR014C::chr1_1	YAR014C	BUD14	-0.483704	0.864135	no	no
YAR015W::chr1_1	YAR015W	ADE1	0.530943	0.169351	no	no
YAR019C::chr1_1	YAR019C	CDC15	-0.0995604	0.625802	no	no
YAR020C::chr1_1	YAR020C	PAU7	0.846445	0.0552459	no	no
YAR023C::chr1_1	YAR023C	YAR023C	-0.657598	0.926669	no	no
YAR027W::chr1_1	YAR027W	UIP3	-1.17558	0.993807	no	no
YAR028W::chr1_1	YAR028W	YAR028W	0.62523	0.125531	no	no
YAR029W::chr1_1	YAR029W	YAR029W	-0.156868	0.668897	no	no
YAR030C::chr1_1	YAR030C	YAR030C	-0.0168421	0.560863	no	no
YAR031W::chr1_1	YAR031W	PRM9	0.168373	0.412112	no	no
YAR035W::chr1_1	YAR035W	YAT1	0.610377	0.131852	no	no
YAR037W::chr1_1	not found	YAR037W	-0.182124	0.68724	no	no
YAR040C::chr1_1	not found	YAR040C	0.168373	0.412112	no	no
YAR042W::chr1_1	YAR042W	SWH1	0.58341	0.143882	no	no
YAR043C::chr1_1	deleted	YAR043C	-1.24666	0.995915	no	no
YAR047C::chr1_1	YAR047C	YAR047C	-0.509699	0.875289	no	no
YAR050W::chr00_12	YAR050W	FLO1	0.0752634	0.486653	no	no
YBL004W::chr2_1	YBL004W	UTP20	1.16837	0.0122798	no	no
YBL007C::chr2_1	YBL007C	SLA1	-0.0853838	0.614869	no	no
YBL008W::chr2_1	YBL008W	HIR1	-0.0410806	0.580146	no	no
YBL009W::chr2_1	YBL009W	ALK2	0.168373	0.412112	no	no
YBL012C::chr2_1	YBL012C	YBL012C	-0.43931	0.843546	no	no
YBL013W::chr2_1	YBL013W	FMT1	0.58341	0.143882	no	no
YBL015W::chr2_1	YBL015W	ACH1	-0.246665	0.73198	no	no
YBL016W::chr2_1	YBL016W	FUS3	0.374824	0.260952	no	no
YBL018C::chr2_1	YBL018C	POP8	0.238762	0.357655	no	no
YBL020W::chr2_1	YBL020W	RFT1	-0.469057	0.857558	no	no
YBL024W::chr2_1	YBL024W	NCL1	-0.393506	0.820254	no	no
YBL025W::chr2_1	YBL025W	RRN10	0.611218	0.131488	yes	yes
YBL026W::chr2_1	YBL026W	LSM2	0.348945	0.278273	no	no
YBL028C::chr2_1	YBL028C	YBL028C	-0.164203	0.674268	no	no
YBL029W::chr2_1	YBL029W	YBL029W	0.961922	0.033628	no	no
YBL031W::chr2_1	YBL031W	SHE1	0.88458	0.0471387	no	no
YBL033C::chr2_1	YBL033C	RIB1	0.50941	0.180594	no	no
YBL034C::chr2_1	YBL034C	STU1	1.37783	0.00376283	no	no
YBL035C::chr2_1	YBL035C	POL12	0.715861	0.091528	no	no
YBL036C::chr2_1	YBL036C	YBL036C	0.868813	0.0503669	no	no
YBL037W::chr2_1	YBL037W	APL3	0.312763	0.303392	no	no
YBL038W::chr2_1	YBL038W	MRPL16	0.58341	0.143882	no	no
YBL040C::chr2_1	YBL040C	ERD2	0.846445	0.0552459	no	no
YBL041W::chr2_1	YBL041W	PRE7	0.846445	0.0552459	no	no
YBL042C::chr2_1	YBL042C	FUI1	0.736749	0.0847633	yes	yes
YBL048W::chr2_1	YBL048W	RRT1	1.10126	0.0173314	no	no
YBL050W::chr2_1	YBL050W	SEC17	-0.5826	0.903108	no	no
YBL051C::chr2_1	YBL051C	PIN4	1.08591	0.0187088	no	no
YBL053W::chr2_1	YBL053W	YBL053W	0.0308693	0.522523	no	no
YBL054W::chr2_1	YBL054W	TOD6	-0.13419	0.652072	no	no
YBL056W::chr2_1	YBL056W	PTC3	0.168373	0.412112	no	no
YBL057C::chr2_1	YBL057C	PTH2	0.448481	0.214865	no	no
YBL059W::chr2_1	YBL059W	YBL059W	0.370007	0.264133	no	no
YBL060W::chr2_1	YBL060W	YEL1	0.305876	0.308285	no	no
YBL061C::chr2_1	YBL061C	SKT5	-0.3361	0.78815	no	no
YBL062W::chr2_1	YBL062W	YBL062W	1.32038	0.00529051	no	no
YBL063W::chr2_1	YBL063W	KIP1	1.04284	0.0230806	no	no
YBL064C::chr2_1	YBL064C	PRX1	0.28385	0.324163	no	no
YBL066C::chr2_1	YBL066C	SEF1	-0.279086	0.753171	no	no
YBL068W::chr2_1	YBL068W	PRS4	0.796404	0.0675098	no	no
YBL070C::chr2_1	YBL070C	YBL070C	0.431407	0.225106	no	no
YBL071C::chr2_1	YBL071C	YBL071C	0.490301	0.190954	no	no
YBL072C::chr2_1	YBL072C	RPS8A	0.820449	0.061377	no	no
YBL074C::chr2_1	YBL074C	AAR2	-0.0755528	0.607233	no	no
YBL077W::chr2_1	YBL077W	YBL077W	1.09437	0.0179383	no	no
YBL078C::chr2_1	YBL078C	ATG8	0.490301	0.190954	no	no
YBL079W::chr2_1	YBL079W	NUP170	0.58341	0.143882	no	no
YBL081W::chr2_1	YBL081W	YBL081W	0.852226	0.0539504	yes	yes
YBL082C::chr2_1	YBL082C	ALG3	0.553037	0.158293	no	no
YBL083C::chr2_1	YBL083C	YBL083C	0.720914	0.0898559	no	no
YBL084C::chr2_1	YBL084C	CDC27	0.106972	0.461082	no	no
YBL085W::chr2_1	YBL085W	BOI1	1.01637	0.0261729	no	no
YBL086C::chr2_1	YBL086C	YBL086C	-0.41659	0.832252	no	no
YBL087C::chr2_1	YBL087C	RPL23A	0.309235	0.305894	no	no
YBL088C::chr2_1	YBL088C	TEL1	0.606494	0.13354	no	no
YBL089W::chr2_1	YBL089W	AVT5	-0.312253	0.773885	no	no
YBL090W::chr2_1	YBL090W	MRP21	0.611218	0.131488	yes	yes
YBL091C::chr2_1	YBL091C	MAP2	0.390765	0.250565	no	no
YBL091C-A::chr00_1	YBL091C-A	SCS22	-0.216291	0.711328	no	no
YBL092W::chr2_1	YBL092W	RPL32	0.168373	0.412112	no	no
YBL094C::chr2_1	YBL094C	YBL094C	0.168373	0.412112	no	no
YBL096C::chr2_2	YBL096C	YBL096C	0.390765	0.250565	no	no
YBL097W::chr2_2	YBL097W	BRN1	-0.265524	0.744417	no	no
YBL098W::chr2_2	YBL098W	BNA4	0.691935	0.0997588	no	no
YBL099W::chr2_2	YBL099W	ATP1	0.354786	0.274315	no	no
YBL100C::chr2_2	YBL100C	YBL100C	-0.135408	0.652984	no	no
YBL101C::chr2_2	YBL101C	ECM21	0.385964	0.25367	no	no
YBL102W::chr2_2	YBL102W	SFT2	0.599007	0.136837	no	no
YBL103C::chr2_2	YBL103C	RTG3	0.399698	0.244841	no	no
YBL104C::chr2_2	YBL104C	SEA4	0.493773	0.189044	no	no
YBL105C::chr2_2	YBL105C	PKC1	0.462104	0.206891	no	no
YBL106C::chr2_2	YBL106C	SRO77	0.490301	0.190954	no	no
YBL107C::chr2_2	YBL107C	YBL107C	0.736749	0.0847633	yes	yes
YBR001C::chr2_2	YBR001C	NTH2	0.0371283	0.51747	no	no
YBR002C::chr2_2	YBR002C	RER2	0.820449	0.061377	no	no
YBR003W::chr2_2	YBR003W	COQ1	-0.749165	0.949179	no	no
YBR005W::chr2_2	YBR005W	RCR1	1.06884	0.0203494	no	no
YBR007C::chr2_2	YBR007C	DSF2	-0.602145	0.909725	no	no
YBR008C::chr2_2	YBR008C	FLR1	0.320376	0.298023	no	no
YBR009C::chr2_2	YBR009C	HHF1	0.863518	0.0514895	no	no
YBR010W::chr2_2	YBR010W	HHT1	0.390765	0.250565	no	no
YBR011C::chr2_2	YBR011C	IPP1	0.431407	0.225106	no	no
YBR012C::chr2_2	YBR012C	YBR012C	-0.233726	0.723274	no	no
YBR013C::chr2_2	YBR013C	YBR013C	0.615832	0.129506	no	no
YBR015C::chr2_2	YBR015C	MNN2	-0.362142	0.803111	no	no
YBR017C::chr2_2	YBR017C	KAP104	0.604472	0.134425	no	no
YBR018C::chr2_2	YBR018C	GAL7	0.0480786	0.508624	no	no
YBR019C::chr2_2	YBR019C	GAL10	0.50941	0.180594	no	no
YBR020W::chr00_18	YBR020W	GAL1	0.188002	0.396705	no	no
YBR021W::chr2_2	YBR021W	FUR4	0.959141	0.0340514	yes	yes
YBR022W::chr2_2	YBR022W	POA1	0.975728	0.0315893	no	no
YBR023C::chr2_2	YBR023C	CHS3	0.109479	0.459066	no	no
YBR025C::chr2_2	YBR025C	OLA1	0.708941	0.0938549	no	no
YBR028C::chr2_2	YBR028C	YPK3	0.516296	0.176948	no	no
YBR030W::chr2_2	YBR030W	RKM3	0.796404	0.0675098	no	no
YBR031W::chr2_2	YBR031W	RPL4A	0.0528956	0.504731	no	no
YBR032W::chr2_2	YBR032W	YBR032W	0.56069	0.154575	no	no
YBR035C::chr2_2	YBR035C	PDX3	0.611218	0.131488	yes	yes
YBR036C::chr2_2	YBR036C	CSG2	0.0573415	0.501137	no	no
YBR039W::chr2_2	YBR039W	ATP3	1.16837	0.0122798	no	no
YBR040W::chr2_2	YBR040W	FIG1	-0.0686664	0.601859	no	no
YBR042C::chr2_2	YBR042C	CST26	-0.234983	0.724126	no	no
YBR043C::chr2_2	YBR043C	QDR3	0.663137	0.110367	no	no
YBR044C::chr2_2	YBR044C	TCM62	0.905338	0.0431439	no	no
YBR045C::chr2_2	YBR045C	GIP1	-0.0180403	0.56182	no	no
YBR046C::chr2_2	YBR046C	ZTA1	0.168373	0.412112	no	no
YBR047W::chr2_2	YBR047W	FMP23	-0.379115	0.812507	no	no
YBR048W::chr2_2	YBR048W	RPS11B	0.736749	0.0847633	yes	yes
YBR049C::chr2_2	YBR049C	REB1	0.4163	0.234394	no	no
YBR050C::chr2_2	YBR050C	REG2	0.846445	0.0552459	no	no
YBR051W::chr2_2	YBR051W	YBR051W	0.275288	0.330425	no	no
YBR054W::chr2_2	YBR054W	YRO2	0.168373	0.412112	no	no
YBR055C::chr2_2	YBR055C	PRP6	0.270252	0.33413	no	no
YBR056W::chr2_2	YBR056W	YBR056W	0.327071	0.293338	no	no
YBR057C::chr2_2	YBR057C	MUM2	1.219	0.00936567	no	no
YBR058C::chr2_2	YBR058C	UBP14	0.338298	0.285558	no	no
YBR059C::chr2_2	YBR059C	AKL1	0.287017	0.321859	no	no
YBR061C::chr2_2	YBR061C	TRM7	0.267908	0.33586	no	no
YBR062C::chr2_2	YBR062C	YBR062C	1.22282	0.00917254	no	no
YBR063C::chr2_2	YBR063C	YBR063C	0.622939	0.126492	no	no
YBR064W::chr2_2	YBR064W	YBR064W	0.250835	0.348566	no	no
YBR065C::chr2_2	YBR065C	ECM2	-0.41659	0.832252	no	no
YBR066C::chr2_2	YBR066C	NRG2	-0.0686664	0.601859	no	no
YBR067C::chr2_2	YBR067C	TIP1	0.991495	0.029387	no	no
YBR068C::chr2_2	YBR068C	BAP2	0.22084	0.371296	no	no
YBR069C::chr2_2	YBR069C	TAT1	0.637858	0.120326	no	no
YBR070C::chr2_2	YBR070C	ALG14	-0.0726353	0.604958	no	no
YBR072W::chr2_2	YBR072W	HSP26	0.50941	0.180594	no	no
YBR073W::chr2_2	YBR073W	RDH54	0.168373	0.412112	no	no
YBR075W::chr00_18	YBR074W	YBR074W	-0.093222	0.620926	no	no
YBR075W::chr2_2	YBR074W	YBR074W	0.390765	0.250565	no	no
YBR076W::chr2_2	YBR076W	ECM8	0.753335	0.0796643	no	no
YBR077C::chr2_2	YBR077C	SLM4	0.627804	0.124457	no	no
YBR078W::chr2_2	YBR078W	ECM33	0.444007	0.217522	no	no
YBR079C::chr2_2	YBR079C	RPG1	-0.0286641	0.570289	no	no
YBR080C::chr00_16a	YBR080C	SEC18	0.601332	0.135807	no	no
YBR081C::chr2_3	YBR081C	SPT7	0.214915	0.375843	no	no
YBR082C::chr2_3	YBR082C	UBC4	-0.0402138	0.57946	no	no
YBR083W::chr00_16a	YBR083W	TEC1	-0.21865	0.712959	no	no
YBR084C-A::chr00_16a	YBR084C-A	RPL19A	-0.194197	0.695851	no	no
YBR084W::chr2_3	YBR084W	MIS1	0.188551	0.396276	no	no
YBR085W::chr2_3	YBR085W	AAC3	0.384691	0.254497	no	no
YBR086C::chr2_3	YBR086C	IST2	0.552288	0.15866	no	no
YBR087W::chr2_3/chr00_16a	YBR087W	RFC5	0.232503	0.362399	no	no
YBR088C::chr00_16a	YBR088C	POL30	0.708941	0.0938549	no	no
YBR089W::chr2_3	YBR089W	YBR089W	1.4163	0.00297435	no	no
YBR090C::chr00_16a	YBR090C	YBR090C	0.694442	0.0988719	no	no
YBR090C-A::chr2_3	YBR089C-A	NHP6B	0.592181	0.139891	no	no
YBR091C::chr2_3	YBR091C	TIM12	1.03087	0.0244388	no	no
YBR092C::chr2_3	YBR092C	PHO3	-0.0380781	0.577767	no	no
YBR093C::chr2_3	YBR093C	PHO5	0.431407	0.225106	no	no
YBR094W::chr2_3	YBR094W	PBY1	0.121067	0.44976	no	no
YBR096W::chr2_3	YBR096W	YBR096W	0.168373	0.412112	no	no
YBR098W::chr2_3	YBR098W	MMS4	0.720914	0.0898559	no	no
YBR100W::chr2_3/chr00_16a	YBR098W	MMS4	0.293904	0.316874	no	no
YBR103W::chr2_3	YBR103W	SIF2	0.86025	0.0521923	no	no
YBR104W::chr2_3	YBR104W	YMC2	0.338298	0.285558	no	no
YBR106W::chr2_3	YBR106W	PHO88	0.431407	0.225106	no	no
YBR107C::chr2_3	YBR107C	IML3	-0.21865	0.712959	no	no
YBR109C::chr2_3	YBR109C	CMD1	0.168373	0.412112	no	no
YBR111C::chr2_3	YBR111C	YSA1	0.385184	0.254176	no	no
YBR112C::chr00_16a	YBR112C	CYC8	-0.02257	0.565435	no	no
YBR113W::chr2_3	YBR113W	YBR113W	-0.317054	0.7768	no	no
YBR117C::chr2_3	YBR117C	TKL2	0.490301	0.190954	no	no
YBR119W::chr2_3	YBR119W	MUD1	0.606494	0.13354	no	no
YBR120C::chr2_3	YBR120C	CBP6	0.402838	0.242846	no	no
YBR121C::chr00_16a	YBR121C	GRS1	-0.200861	0.700558	no	no
YBR123C::chr2_3	YBR123C	TFC1	0.730252	0.086826	no	no
YBR124W::chr2_3	YBR124W	YBR124W	-0.00671391	0.552759	no	no
YBR125C::chr00_16a	YBR125C	PTC4	-0.131187	0.649821	no	no
YBR129C::chr2_3	YBR129C	OPY1	0.753335	0.0796643	no	no
YBR130C::chr2_3	YBR130C	SHE3	0.229773	0.364475	no	no
YBR131W::chr00_16a	YBR131W	CCZ1	0.259521	0.34208	no	no
YBR132C::chr2_3	YBR132C	AGP2	0.204899	0.383569	no	no
YBR134W::chr2_3	YBR134W	YBR134W	-0.732092	0.945462	no	no
YBR136W::chr2_3	YBR136W	MEC1	-0.210139	0.707056	no	no
YBR137W::chr2_3	YBR137W	YBR137W	-0.045752	0.583842	no	no
YBR138C::chr2_3	YBR138C	YBR138C	0.71857	0.0906287	no	no
YBR139W::chr2_3	YBR139W	YBR139W	-0.606068	0.911012	no	no
YBR140C::chr2_3	YBR140C	IRA1	0.115905	0.453902	no	no
YBR141C::chr2_3	YBR141C	YBR141C	-0.441681	0.844695	no	no
YBR142W::chr2_3	YBR142W	MAK5	-0.568593	0.898151	no	no
YBR144C::chr2_3	YBR144C	YBR144C	1.12257	0.0155631	no	no
YBR145W::chr2_3	YBR145W	ADH5	-0.526773	0.882258	no	no
YBR146W::chr2_3	YBR146W	MRPS9	0.421139	0.231396	no	no
YBR147W::chr2_3	YBR147W	RTC2	0.708941	0.0938549	no	no
YBR148W::chr2_3	YBR148W	YSW1	0.305876	0.308285	no	no
YBR149W::chr2_3	YBR149W	ARA1	0.0428419	0.512855	no	no
YBR151W::chr2_3	YBR151W	APD1	0.0308693	0.522523	no	no
YBR152W::chr2_3	YBR152W	SPP381	0.310392	0.305073	no	no
YBR153W::chr2_3	YBR153W	RIB7	0.331872	0.289999	no	no
YBR158W::chr2_3	YBR158W	AMN1	0.227266	0.366385	no	no
YBR161W::chr2_3	YBR161W	CSH1	-0.284139	0.756391	no	no
YBR162W-A::chr2_3	YBR162W-A	YSY6	-0.379115	0.812507	no	no
YBR163W::chr2_3	YBR163W	EXO5	0.0215314	0.530054	no	no
YBR164C::chr2_3	YBR164C	ARL1	0.593679	0.139217	no	no
YBR165W::chr2_3	YBR165W	UBS1	-0.831627	0.964387	no	no
YBR166C::chr2_3	YBR166C	TYR1	0.128844	0.44353	no	no
YBR167C::chr2_3	YBR167C	POP7	0.258571	0.342787	no	no
YBR168W::chr00_16a	YBR168W	PEX32	-0.291059	0.760763	no	no
YBR169C::chr00_16a	YBR169C	SSE2	0.6538	0.113974	no	no
YBR170C::chr2_3	YBR170C	NPL4	0.275288	0.330425	no	no
YBR171W::chr2_3	YBR171W	SEC66	0.753335	0.0796643	no	no
YBR172C::chr2_3	YBR172C	SMY2	0.964839	0.0331883	no	no
YBR173C::chr2_4	YBR173C	UMP1	-0.00155221	0.548621	no	no
YBR174C::chr2_4	YBR174C	YBR174C	0.270252	0.33413	no	no
YBR175W::chr2_4	YBR175W	SWD3	0.242373	0.354927	no	no
YBR176W::chr2_4	YBR176W	ECM31	0.959141	0.0340514	yes	yes
YBR177C::chr2_4	YBR177C	EHT1	1.15179	0.013392	yes	yes
YBR178W::chr2_4	YBR178W	YBR178W	0.246375	0.351914	no	no
YBR179C::chr2_4	YBR179C	FZO1	0.452166	0.212691	no	no
YBR180W::chr2_4	YBR180W	DTR1	-0.0946616	0.622035	no	no
YBR181C::chr2_4	YBR181C	RPS6B	-0.694124	0.936424	no	no
YBR182C::chr2_4	YBR182C	SMP1	-0.0242723	0.566792	no	no
YBR183W::chr2_4	YBR183W	YPC1	0.736749	0.0847633	yes	yes
YBR184W::chr2_4	YBR184W	YBR184W	-0.275234	0.750701	no	no
YBR185C::chr2_4	YBR185C	MBA1	1.60133	0.000887523	no	yes
YBR186W::chr2_4	YBR186W	PCH2	0.708941	0.0938549	no	no
YBR188C::chr2_4	YBR188C	NTC20	0.736657	0.0847923	no	no
YBR189W::chr00_14	YBR189W	RPS9B	1.22496	0.00906614	no	no
YBR191W::chr00_11	YBR191W	RPL21A	0.276881	0.329256	no	no
YBR193C::chr2_4	YBR193C	MED8	0.457879	0.209345	no	no
YBR194W::chr2_4	YBR194W	AIM4	1.56692	0.00112239	no	no
YBR195C::chr2_4	YBR195C	MSI1	0.242373	0.354927	no	no
YBR196C::chr2_4	YBR196C	PGI1	0.462104	0.206891	no	no
YBR197C::chr2_4	YBR197C	YBR197C	-0.246665	0.73198	no	no
YBR199W::chr2_4	YBR199W	KTR4	-0.267726	0.745849	no	no
YBR200W::chr2_4	YBR200W	BEM1	0.361018	0.270123	no	no
YBR202W::chr2_4	YBR202W	MCM7	0.168373	0.412112	no	no
YBR203W::chr2_4	YBR203W	COS111	-0.309159	0.771995	no	no
YBR204C::chr2_4	YBR204C	LDH1	0.168373	0.412112	no	no
YBR205W::chr2_4	YBR205W	KTR3	0.0558981	0.502304	no	no
YBR206W::chr2_4	YBR206W	YBR206W	0.218999	0.372708	no	no
YBR207W::chr2_4	YBR207W	FTH1	-0.308065	0.771325	no	no
YBR208C::chr2_4	YBR208C	DUR1,2	1.2603	0.00745603	no	no
YBR209W::chr2_4	YBR209W	YBR209W	-0.532067	0.884362	no	no
YBR210W::chr2_4	YBR210W	ERV15	-0.107156	0.63162	no	no
YBR211C::chr2_4	YBR211C	AME1	0.776055	0.0730609	no	no
YBR212W::chr2_4	YBR212W	NGR1	0.520675	0.174655	no	no
YBR213W::chr2_4	YBR213W	MET8	0.0219425	0.529723	no	no
YBR214W::chr2_4	YBR214W	SDS24	0.878866	0.0482888	no	no
YBR215W::chr2_4	YBR215W	HPC2	-0.0953482	0.622564	no	no
YBR216C::chr2_4	YBR216C	YBP1	-0.189179	0.692285	no	no
YBR217W::chr2_4	YBR217W	ATG12	-0.597162	0.908071	no	no
YBR218C::chr2_4	YBR218C	PYC2	-0.291059	0.760763	no	no
YBR219C::chr2_4	YBR219C	YBR219C	0.753335	0.0796643	no	no
YBR220C::chr2_4	YBR220C	YBR220C	0.181429	0.401847	no	no
YBR221C::chr2_4	YBR221C	PDB1	-0.16075	0.671744	no	no
YBR222C::chr2_4	YBR222C	PCS60	-0.246665	0.73198	no	no
YBR223C::chr2_4	YBR223C	TDP1	-0.543153	0.88868	no	no
YBR224W::chr2_4	YBR224W	YBR224W	-0.190708	0.693373	no	no
YBR225W::chr2_4	YBR225W	YBR225W	0.168373	0.412112	no	no
YBR226C::chr2_4	YBR226C	YBR226C	0.787283	0.0699564	no	no
YBR227C::chr2_4	YBR227C	MCX1	-0.16025	0.671378	no	no
YBR228W::chr2_4	YBR228W	SLX1	0.642304	0.11853	no	no
YBR229C::chr2_4	YBR229C	ROT2	0.207901	0.381248	no	no
YBR230C::chr2_4	YBR230C	OM14	-0.101716	0.627457	no	no
YBR231C::chr2_4	YBR231C	SWC5	0.168373	0.412112	no	no
YBR232C::chr00_8	YBR232C	YBR232C	0.244724	0.353156	no	no
YBR233W::chr2_4	YBR233W	PBP2	-0.0144913	0.558984	no	no
YBR234C::chr2_4	YBR234C	ARC40	0.293904	0.316874	no	no
YBR235W::chr2_4	YBR235W	YBR235W	0.168373	0.412112	no	no
YBR236C::chr2_4	YBR236C	ABD1	0.796404	0.0675098	no	no
YBR237W::chr2_4	YBR237W	PRP5	0.0463823	0.509995	no	no
YBR238C::chr2_4	YBR238C	YBR238C	0.305876	0.308285	no	no
YBR239C::chr2_4	YBR239C	ERT1	-0.301112	0.767039	no	no
YBR240C::chr2_4	YBR240C	THI2	0.698888	0.0973131	no	no
YBR241C::chr2_4	YBR241C	YBR241C	0.194368	0.391741	no	no
YBR242W::chr2_4	YBR242W	YBR242W	0.0468108	0.509648	no	no
YBR243C::chr2_4	YBR243C	ALG7	-0.193234	0.695167	no	no
YBR244W::chr2_4	YBR244W	GPX2	0.212094	0.378014	no	no
YBR245C::chr2_4	YBR245C	ISW1	0.537607	0.165964	no	no
YBR246W::chr2_4	YBR246W	RRT2	0.490301	0.190954	no	no
YBR247C::chr2_4	YBR247C	ENP1	-0.111735	0.635112	no	no
YBR248C::chr2_4	YBR248C	HIS7	-0.279086	0.753171	no	no
YBR249C::chr2_4	YBR249C	ARO4	0.385964	0.25367	no	no
YBR250W::chr2_4	YBR250W	SPO23	-0.0540196	0.590365	no	no
YBR251W::chr2_4	YBR251W	MRPS5	-0.100814	0.626764	no	no
YBR252W::chr2_4	YBR252W	DUT1	-0.772734	0.953977	no	no
YBR253W::chr2_4	YBR253W	SRB6	-0.0795547	0.610346	no	no
YBR254C::chr2_4	YBR254C	TRS20	0.613158	0.130652	no	no
YBR255W::chr2_4	YBR255W	MTC4	-0.298753	0.765574	no	no
YBR256C::chr2_4	YBR256C	RIB5	0.168373	0.412112	no	no
YBR257W::chr2_4	YBR257W	POP4	0.0428419	0.512855	no	no
YBR258C::chr2_4	YBR258C	SHG1	0.312763	0.303392	no	no
YBR259W::chr2_4	YBR259W	YBR259W	0.440452	0.219647	no	no
YBR260C::chr2_4	YBR260C	RGD1	0.168373	0.412112	no	no
YBR261C::chr2_4	YBR261C	TAE1	0.772444	0.0740815	no	no
YBR262C::chr2_4	YBR262C	AIM5	0.415013	0.235195	no	no
YBR263W::chr2_4	YBR263W	SHM1	0.28385	0.324163	no	no
YBR264C::chr2_4	YBR264C	YPT10	0.0428419	0.512855	no	no
YBR265W::chr2_4	YBR265W	TSC10	-0.362142	0.803111	no	no
YBR266C::chr2_4	YBR266C	SLM6	0.599007	0.136837	no	no
YBR267W::chr2_4	YBR267W	REI1	0.414533	0.235494	no	no
YBR268W::chr2_4	YBR268W	MRPL37	-0.287307	0.758398	no	no
YBR269C::chr00_1	YBR269C	FMP21	-0.0984137	0.624922	no	no
YBR270C::chr00_16a	YBR270C	BIT2	-0.308949	0.771866	no	no
YBR271W::chr00_1	YBR271W	EFM2	-0.461678	0.854163	no	no
YBR272C::chr00_16a	YBR272C	HSM3	-0.0968962	0.623755	no	no
YBR273C::chr00_1	YBR273C	UBX7	0.431407	0.225106	no	no
YBR275C::chr00_16a	YBR275C	RIF1	0.117747	0.452424	no	no
YBR276C::chr00_16a	YBR276C	PPS1	0.331872	0.289999	no	no
YBR277C::chr00_1	YBR277C	YBR277C	-0.197277	0.69803	no	no
YBR278W::chr00_1	YBR278W	DPB3	0.101259	0.465681	no	no
YBR280C::chr00_16a	YBR280C	SAF1	-0.172664	0.68042	no	no
YBR281C::chr00_1	YBR281C	DUG2	0.0688371	0.491846	no	no
YBR282W::chr00_1	YBR282W	MRPL27	0.689205	0.100731	no	no
YBR284W::chr00_1	YBR284W	YBR284W	-0.200861	0.700558	no	no
YBR285W::chr00_1	YBR285W	YBR285W	-0.350094	0.796271	no	no
YBR286W::chr00_1	YBR286W	APE3	0.927365	0.0392088	no	no
YBR287W::chr00_16a	YBR287W	YBR287W	-0.200861	0.700558	no	no
YBR288C::chr00_16a	YBR288C	APM3	-0.0946616	0.622035	no	no
YBR289W::chr00_16a	YBR289W	SNF5	-0.738518	0.946885	no	no
YBR290W::chr00_1	YBR290W	BSD2	-0.308065	0.771325	no	no
YBR291C::chr00_1	YBR291C	CTP1	0.168373	0.412112	no	no
YBR292C::chr00_1	YBR292C	YBR292C	0.0614576	0.49781	no	no
YBR293W::chr00_1	YBR293W	VBA2	-1.3529	0.997883	no	no
YBR294W::chr00_16a	YBR294W	SUL1	-0.43202	0.839978	no	no
YBR297W::chr00_1	YBR297W	MAL33	-0.0160518	0.560231	no	no
YBR298C::chr00_1	YBR298C	MAL31	0.101259	0.465681	no	no
YBR301W::chr00_16a	YBR301W	PAU24	0.0578144	0.500755	no	no
YCL001W::chr3_1	YCL001W	RER1	-0.223945	0.716602	no	no
YCL001W-A::chr00_1	YCL001W-A	YCL001W-A	0.0163697	0.534213	no	no
YCL002C::chr3_1	YCL002C	YCL002C	-0.303696	0.768636	no	no
YCL003W::chr3_1	YCL004W	PGS1	-0.214956	0.710404	no	no
YCL004W::chr3_1	YCL004W	PGS1	-0.924737	0.976852	no	no
YCL005W::chr3_1	YCL005W	LDB16	0.575531	0.147532	no	no
YCL006C::chr3_1/chr00_12	deleted	YCL006C	-0.0121995	0.557151	no	no
YCL007C::chr3_1	YCL007C	YCL007C	0.577485	0.146621	no	no
YCL008C::chr3_1	YCL008C	STP22	0.0147426	0.535523	no	no
YCL010C::chr3_1	YCL010C	SGF29	-0.247808	0.732742	no	no
YCL011C::chr3_1	YCL011C	GBP2	-0.0180403	0.56182	no	no
YCL012W::chr3_1	YCL014W	BUD3	-0.609235	0.912041	no	no
YCL013W::chr3_1	deleted	YCL013W	-0.555993	0.893536	no	no
YCL014W::chr3_1	YCL014W	BUD3	-0.431478	0.839711	no	no
YCL016C::chr3_1	YCL016C	DCC1	0.248543	0.350285	no	no
YCL017C::chr3_1	YCL017C	NFS1	-0.453116	0.850158	no	no
YCL023C::chr3_1/chr00_12	YCL023C	YCL023C	-0.719152	0.942503	no	no
YCL024W::chr3_1	YCL024W	KCC4	0.323822	0.295607	no	no
YCL025C::chr3_1	YCL025C	AGP1	-0.665617	0.928903	no	no
YCL026C::chr3_1	deleted	YCL026C	0.0480786	0.508624	no	no
YCL026C-A::chr00_16a	YCL026C-A	FRM2	0.303302	0.310123	no	no
YCL027W::chr3_1	YCL027W	FUS1	-0.174168	0.681509	no	no
YCL028W::chr3_1	YCL028W	RNQ1	0.50941	0.180594	no	no
YCL029C::chr3_1	YCL029C	BIK1	-0.0338969	0.574449	no	no
YCL030C::chr3_1	YCL030C	HIS4	0.413485	0.236148	no	no
YCL032W::chr3_1	YCL032W	STE50	-0.533734	0.885019	no	no
YCL033C::chr3_1	YCL033C	MXR2	-0.532067	0.884362	no	no
YCL034W::chr3_1	YCL034W	LSB5	-0.593652	0.906892	no	no
YCL035C::chr00_11	YCL035C	GRX1	0.343459	0.282015	no	no
YCL036W::chr3_1	YCL036W	GFD2	0.29202	0.318234	no	no
YCL037C::chr3_1	YCL037C	SRO9	0.58341	0.143882	no	no
YCL038C::chr00_12	YCL038C	ATG22	0.448481	0.214865	no	no
YCL039W::chr3_1	YCL039W	GID7	0.24727	0.351241	no	no
YCL040W::chr3_1	YCL040W	GLK1	-0.554093	0.892827	no	no
YCL041C::chr00_11	YCL041C	YCL041C	-0.473173	0.859427	no	no
YCL041C::chr3_1	YCL041C	YCL041C	-0.275234	0.750701	no	no
YCL042W::chr3_1	YCL042W	YCL042W	-0.0121995	0.557151	no	no
YCL043C::chr3_1	YCL043C	PDI1	0.362821	0.268916	no	no
YCL044C::chr3_1	YCL044C	MGR1	-0.0431313	0.58177	no	no
YCL045C::chr3_1	YCL045C	EMC1	-0.107262	0.6317	no	no
YCL046W::chr3_1	YCL046W	YCL046W	-0.638982	0.921275	no	no
YCL047C::chr3_1	YCL047C	POF1	0.162167	0.417013	no	no
YCL048W::chr3_1	YCL048W	SPS22	-0.429529	0.838747	no	no
YCL049C::chr3_1	YCL049C	YCL049C	-0.831627	0.964387	no	no
YCL050C::chr3_1	YCL050C	APA1	-0.447617	0.847547	no	no
YCL051W::chr3_1	YCL051W	LRE1	-0.0660925	0.599845	no	no
YCL052C::chr3_1	YCL052C	PBN1	-1.06867	0.988823	no	no
YCL053C::chr3_1	deleted	YCL053C	-0.111735	0.635112	no	no
YCL054W::chr3_1	YCL054W	SPB1	0.374824	0.260952	no	no
YCL055W::chr3_1	YCL055W	KAR4	-0.852091	0.967517	no	no
YCL056C::chr3_1	YCL056C	PEX34	-0.689608	0.935275	no	no
YCL057W::chr3_1	YCL057W	PRD1	-0.488739	0.866347	no	no
YCL058C::chr00_12	YCL058C	FYV5	0.0412609	0.514132	no	no
YCL059C::chr3_1	YCL059C	KRR1	0.178405	0.404219	no	no
YCL060C::chr3_1	YCL061C	MRC1	-0.110572	0.634226	no	no
YCL061C::chr3_1	YCL061C	MRC1	0.125304	0.446365	no	no
YCL062W::chr3_1	YCL063W	VAC17	-0.246665	0.73198	no	no
YCL063W::chr3_1	YCL063W	VAC17	0.0859106	0.478055	no	no
YCL064C::chr3_1	YCL064C	CHA1	-1.59716	0.999603	no	no
YCL069W::chr3_1	YCL069W	VBA3	0.568911	0.150647	no	no
YCL074W::chr00_12	YCL074W	YCL074W	-0.516754	0.878203	no	no
YCL075W::chr00_12	YCL075W	YCL075W	-0.0914943	0.619593	no	no
YCL076W::chr00_12	YCL076W	YCL076W	-0.831627	0.964387	no	no
YCR001W::chr3_1	YCR001W	YCR001W	0.20845	0.380824	no	no
YCR002C::chr3_1	YCR002C	CDC10	-0.391055	0.818949	no	no
YCR003W::chr3_1	YCR003W	MRPL32	0.168373	0.412112	no	no
YCR004C::chr3_1	YCR004C	YCP4	0.0272631	0.525433	no	no
YCR005C::chr3_1	YCR005C	CIT2	-0.227556	0.719074	no	no
YCR006C::chr3_1	YCR006C	YCR006C	-0.71615	0.941799	no	no
YCR007C::chr3_1	YCR007C	YCR007C	0.13636	0.437523	no	no
YCR008W::chr3_1	YCR008W	SAT4	-0.246665	0.73198	no	no
YCR009C::chr3_1	YCR009C	RVS161	0.00331355	0.544715	no	no
YCR010C::chr3_1	YCR010C	ADY2	-0.0121995	0.557151	no	no
YCR011C::chr3_1	YCR011C	ADP1	0.0528956	0.504731	no	no
YCR012W::chr00_11	YCR012W	PGK1	0.50941	0.180594	no	no
YCR012W::chr3_1	YCR012W	PGK1	-0.0726353	0.604958	no	no
YCR013C::chr00_11	YCR013C	YCR013C	-0.282289	0.755214	no	no
YCR013C::chr3_1	YCR013C	YCR013C	-0.643555	0.922627	no	no
YCR014C::chr3_1	YCR014C	POL4	-0.105802	0.630585	no	no
YCR015C::chr3_1	YCR015C	YCR015C	-0.580088	0.902232	no	no
YCR016W::chr3_1	YCR016W	YCR016W	-0.131187	0.649821	no	no
YCR017C::chr3_1	YCR017C	CWH43	0.00331355	0.544715	no	no
YCR019W::chr3_1	YCR019W	MAK32	0.194845	0.391369	no	no
YCR020C::chr3_1	YCR020C	PET18	0.316471	0.300771	no	no
YCR020C-A::chr3_1	YCR020C-A	MAK31	-0.455349	0.85121	no	no
YCR020W-B::chr00_1	YCR020W-B	HTL1	-0.291059	0.760763	no	no
YCR021C::chr3_1	YCR021C	HSP30	-1.06429	0.98856	no	no
YCR022C::chr3_1	YCR022C	YCR022C	-0.153555	0.66646	no	no
YCR023C::chr3_1	YCR023C	YCR023C	0.6538	0.113974	no	no
YCR024C::chr00_1	YCR024C	SLM5	1.24638	0.00805743	no	no
YCR024C-A::chr00_1	YCR024C-A	PMP1	-0.770227	0.953485	no	no
YCR026C::chr00_1	YCR026C	NPP1	-0.329715	0.784383	no	no
YCR027C::chr00_1	YCR027C	RHB1	-0.597162	0.908071	no	no
YCR028C::chr00_1	YCR028C	FEN2	1.43141	0.00270788	no	no
YCR028C-A::chr00_16a	YCR028C-A	RIM1	-0.144085	0.659452	no	no
YCR030C::chr00_16a	YCR030C	SYP1	-0.463895	0.855189	no	no
YCR031C::chr00_1	YCR031C	RPS14A	0.608945	0.132473	no	no
YCR032W::chr00_16a	YCR032W	BPH1	-0.101716	0.627457	no	no
YCR033W::chr00_16a	YCR033W	SNT1	0.431407	0.225106	no	no
YCR034W::chr00_1	YCR034W	FEN1	-0.124311	0.644646	no	no
YCR035C::chr00_1	YCR035C	RRP43	0.959141	0.0340514	yes	yes
YCR036W::chr00_1	YCR036W	RBK1	0.128844	0.44353	no	no
YCR043C::chr00_1	YCR043C	YCR043C	-0.41659	0.832252	no	no
YCR044C::chr00_1	YCR044C	PER1	-1.00748	0.984626	no	no
YCR045C::chr00_1	YCR045C	RRT12	-0.301112	0.767039	no	no
YCR048W::chr00_16a	YCR048W	ARE1	0.927365	0.0392088	no	no
YCR049C::chr00_1	YCR049C	YCR049C	-0.0242723	0.566792	no	no
YCR050C::chr00_1	YCR050C	YCR050C	-0.111735	0.635112	no	no
YCR051W::chr00_1	YCR051W	YCR051W	0.905338	0.0431439	no	no
YCR052W::chr00_1	YCR052W	RSC6	0.470653	0.201978	no	no
YCR053W::chr00_16a	YCR053W	THR4	-0.679624	0.93268	no	no
YCR054C::chr00_16a	YCR054C	CTR86	-0.379115	0.812507	no	no
YCR057C::chr00_16a	YCR057C	PWP2	0.22084	0.371296	no	no
YCR059C::chr00_1	YCR059C	YIH1	0.805803	0.0650586	no	no
YCR060W::chr00_16a	YCR060W	TAH1	0.191093	0.394292	no	no
YCR062W::chr00_16a	YCR061W	YCR061W	-0.668128	0.929592	no	no
YCR063W::chr00_1	YCR063W	BUD31	0.555396	0.157141	no	no
YCR064C::chr00_16a	YCR064C	YCR064C	0.896293	0.0448496	no	no
YCR065W::chr00_1	YCR065W	HCM1	0.863518	0.0514895	no	no
YCR066W::chr00_1	YCR066W	RAD18	0.4163	0.234394	no	no
YCR067C::chr00_16a	YCR067C	SED4	0.724766	0.0885965	no	no
YCR068W::chr00_1	YCR068W	ATG15	0.663137	0.110367	no	no
YCR069W::chr00_16a	YCR069W	CPR4	-0.568593	0.898151	no	no
YCR071C::chr00_1	YCR071C	IMG2	-0.107262	0.6317	no	no
YCR072C::chr00_16a	YCR072C	RSA4	-0.41659	0.832252	no	no
YCR073C::chr00_16a	YCR073C	SSK22	-0.104646	0.6297	no	no
YCR075C::chr00_16a	YCR075C	ERS1	-0.437348	0.842591	no	no
YCR076C::chr00_1	YCR076C	FUB1	-0.580088	0.902232	no	no
YCR077C::chr00_1	YCR077C	PAT1	0.908162	0.0426223	no	no
YCR079W::chr00_1	YCR079W	PTC6	0.305876	0.308285	no	no
YCR081W::chr00_1	YCR081W	SRB8	-0.185264	0.68949	no	no
YCR083W::chr00_16a	YCR083W	TRX3	0.288667	0.320662	no	no
YCR084C::chr00_16a	YCR084C	TUP1	0.546884	0.161323	no	no
YCR085W::chr00_1	YCR085W	YCR085W	-0.267726	0.745849	no	no
YCR086W::chr00_1	YCR086W	CSM1	-0.885504	0.972138	no	no
YCR087C-A::chr00_1	YCR087C-A	YCR087C-A	-1.03861	0.986906	no	no
YCR087W::chr00_1	YCR087W	YCR087W	0.0752634	0.486653	no	no
YCR088W::chr00_16a	YCR088W	ABP1	1.03087	0.0244388	no	no
YCR089W::chr00_16a	YCR089W	FIG2	-0.41659	0.832252	no	no
YCR090C::chr00_2	YCR090C	YCR090C	-0.372196	0.808711	no	no
YCR091W::chr00_2	YCR091W	KIN82	-0.185264	0.68949	no	no
YCR092C::chr00_2	YCR092C	MSH3	-0.487673	0.865881	no	no
YCR093W::chr00_2	YCR093W	CDC39	0.431407	0.225106	no	no
YCR094W::chr00_2	YCR094W	CDC50	0.838224	0.0571301	no	no
YCR095C::chr00_14	YCR095C	OCA4	0.0634032	0.496237	no	no
YCR098C::chr00_2	YCR098C	GIT1	0.00487406	0.543461	no	no
YCR099C::chr00_2	YCR099C	YCR099C	0.453775	0.211745	no	no
YCR100C::chr00_2	YCR100C	YCR100C	-0.166046	0.675613	no	no
YCR101C::chr00_2	YCR101C	YCR101C	0.361018	0.270123	no	no
YCR102C::chr00_2	YCR102C	YCR102C	0.253262	0.346749	no	no
YCR102W-A::chr00_14	YCR102W-A	YCR102W-A	0.242373	0.354927	no	no
YCR105W::chr00_2	YCR105W	ADH7	0.143282	0.432003	no	no
YCR106W::chr00_2	YCR106W	RDS1	-0.0242723	0.566792	no	no
YCR107W::chr00_17a	YCR107W	AAD3	0.293904	0.316874	no	no
YDL001W::chr4_1	YDL001W	RMD1	0.193908	0.392099	no	no
YDL002C::chr4_1	YDL002C	NHP10	-0.476962	0.861134	no	no
YDL003W::chr4_1	YDL003W	MCD1	-0.0144913	0.558984	no	no
YDL004W::chr4_1	YDL004W	ATP16	-0.729748	0.944935	no	no
YDL005C::chr4_1	YDL005C	MED2	-0.168662	0.677517	no	no
YDL006W::chr4_1	YDL006W	PTC1	0.498521	0.186453	no	no
YDL007W::chr4_1	YDL007W	RPT2	-0.302933	0.768165	no	no
YDL008W::chr4_1	YDL008W	APC11	0.149264	0.427243	no	no
YDL009C::chr4_1	YDL009C	YDL009C	-0.210139	0.707056	no	no
YDL010W::chr4_1	YDL010W	GRX6	-0.296295	0.764043	no	no
YDL011C::chr4_1	YDL011C	YDL011C	-0.379115	0.812507	no	no
YDL012C::chr4_1	YDL012C	YDL012C	-0.145736	0.660678	no	no
YDL013W::chr4_1	YDL013W	SLX5	0.352797	0.275659	no	no
YDL014W::chr4_1	YDL014W	NOP1	0.246375	0.351914	no	no
YDL015C::chr4_1	YDL015C	TSC13	0.555892	0.156899	no	no
YDL016C::chr4_1	YDL016C	YDL016C	-0.386216	0.816355	no	no
YDL017W::chr4_1	YDL017W	CDC7	0.0267388	0.525856	no	no
YDL018C::chr4_1	YDL018C	ERP3	0.317236	0.300232	no	no
YDL019C::chr4_1	YDL019C	OSH2	0.310392	0.305073	no	no
YDL020C::chr4_1	YDL020C	RPN4	0.361018	0.270123	no	no
YDL021W::chr4_1	YDL021W	GPM2	0.169022	0.4116	no	no
YDL022W::chr4_1	YDL022W	GPD1	-0.101716	0.627457	no	no
YDL023C::chr4_1	YDL023C	YDL023C	-0.12637	0.646199	no	no
YDL024C::chr4_1	YDL024C	DIA3	-0.445445	0.846507	no	no
YDL025C::chr4_1	YDL025C	RTK1	-0.160935	0.67188	no	no
YDL026W::chr4_1	YDL026W	YDL026W	0.234054	0.361222	no	no
YDL027C::chr4_1	YDL027C	YDL027C	-0.13411	0.652013	no	no
YDL028C::chr4_1	YDL028C	MPS1	-0.395528	0.821326	no	no
YDL029W::chr4_1	YDL029W	ARP2	-0.295574	0.763593	no	no
YDL030W::chr4_1	YDL030W	PRP9	0.496427	0.187593	no	no
YDL031W::chr00_17a	YDL031W	DBP10	-0.221039	0.714605	no	no
YDL033C::chr4_1	YDL033C	SLM3	-1.02802	0.986166	no	no
YDL034W::chr4_1	YDL034W	YDL034W	0.168373	0.412112	no	no
YDL035C::chr4_1	YDL035C	GPR1	0.856429	0.0530238	no	no
YDL036C::chr4_1	YDL036C	PUS9	0.205367	0.383206	no	no
YDL037C::chr4_1	YDL037C	BSC1	-0.559548	0.894853	no	no
YDL038C::chr4_1	YDL039C	PRM7	-0.0297997	0.571193	no	no
YDL039C::chr4_1	YDL039C	PRM7	0.0573415	0.501137	no	no
YDL040C::chr4_1	YDL040C	NAT1	0.267908	0.33586	no	no
YDL041W::chr4_1	YDL041W	YDL041W	-0.0629528	0.597385	no	no
YDL042C::chr4_1	YDL042C	SIR2	-0.955616	0.980072	no	no
YDL043C::chr4_1	YDL043C	PRP11	0.0594115	0.499464	no	no
YDL044C::chr4_1	YDL044C	MTF2	-0.41659	0.832252	no	no
YDL045C::chr4_1	YDL045C	FAD1	-0.174515	0.68176	no	no
YDL045W-A::chr4_1	YDL045W-A	MRP10	0.0322236	0.52143	no	no
YDL046W::chr4_1	YDL046W	NPC2	-0.430375	0.839166	no	no
YDL047W::chr4_1	YDL047W	SIT4	-0.568593	0.898151	no	no
YDL048C::chr4_1	YDL048C	STP4	-0.0171829	0.561135	no	no
YDL049C::chr4_1	YDL049C	KNH1	0.0528956	0.504731	no	no
YDL050C::chr4_1	YDL050C	YDL050C	-0.327212	0.782896	no	no
YDL051W::chr4_1	YDL051W	LHP1	-0.802481	0.959505	no	no
YDL052C::chr4_1	YDL052C	SLC1	0.682946	0.102987	no	no
YDL053C::chr4_1	YDL053C	PBP4	0.168373	0.412112	no	no
YDL054C::chr4_1	YDL054C	MCH1	-0.757627	0.950946	no	no
YDL055C::chr4_1	YDL055C	PSA1	-0.453116	0.850158	no	no
YDL056W::chr4_1	YDL056W	MBP1	-0.720596	0.942839	no	no
YDL057W::chr4_1	YDL057W	YDL057W	-0.687237	0.934666	no	no
YDL058W::chr00_17a	YDL058W	USO1	-0.110603	0.63425	no	no
YDL059C::chr4_1	YDL059C	RAD59	-0.873447	0.970538	no	no
YDL060W::chr4_1	YDL060W	TSR1	0.109479	0.459066	no	no
YDL061C::chr4_1	YDL061C	RPS29B	0.593446	0.139321	no	no
YDL062W::chr4_1	YDL062W	YDL062W	-0.13419	0.652072	no	no
YDL063C::chr4_1	YDL063C	YDL063C	-0.287307	0.758398	no	no
YDL064W::chr4_1	YDL064W	UBC9	0.361018	0.270123	no	no
YDL065C::chr4_1	YDL065C	PEX19	-0.317054	0.7768	no	no
YDL066W::chr4_1	YDL066W	IDP1	0.121067	0.44976	no	no
YDL067C::chr4_1	YDL067C	COX9	-1.07264	0.989057	no	no
YDL068W::chr4_1	YDL068W	YDL068W	-0.515154	0.877546	no	no
YDL070W::chr4_1	YDL070W	BDF2	-0.213498	0.709392	no	no
YDL071C::chr4_1	YDL071C	YDL071C	0.344223	0.281493	no	no
YDL072C::chr4_1	YDL072C	YET3	-0.623041	0.916422	no	no
YDL073W::chr4_1	YDL073W	YDL073W	0.299537	0.31282	no	no
YDL074C::chr4_1	YDL074C	BRE1	-0.41659	0.832252	no	no
YDL075W::chr4_1	YDL075W	RPL31A	-0.523505	0.880946	no	no
YDL076C::chr4_1	YDL076C	RXT3	0.131337	0.441536	no	no
YDL077C::chr4_1	YDL077C	VAM6	-0.761238	0.951684	no	no
YDL078C::chr4_1	YDL078C	MDH3	0.0163697	0.534213	no	no
YDL079C::chr4_1	YDL079C	MRK1	0.0688371	0.491846	no	no
YDL080C::chr4_1	YDL080C	THI3	-0.3462	0.79403	no	no
YDL081C::chr4_1	YDL081C	RPP1A	0.0881565	0.476243	no	no
YDL082W::chr4_1	YDL082W	RPL13A	0.117747	0.452424	no	no
YDL083C::chr4_1	YDL083C	RPS16B	-0.301112	0.767039	no	no
YDL084W::chr4_1	YDL084W	SUB2	-0.297291	0.764664	no	no
YDL085W::chr4_1	YDL085W	NDE2	0.0924239	0.472801	no	no
YDL086W::chr4_1	YDL086W	YDL086W	-0.349476	0.795916	no	no
YDL087C::chr4_1	YDL087C	LUC7	-0.831627	0.964387	no	no
YDL088C::chr4_1	YDL088C	ASM4	0.0859106	0.478055	no	no
YDL089W::chr4_1	YDL089W	NUR1	-0.0422365	0.581061	no	no
YDL090C::chr4_1	YDL090C	RAM1	-0.469057	0.857558	no	no
YDL091C::chr4_1	YDL091C	UBX3	-0.858099	0.968392	no	no
YDL092W::chr4_1	YDL092W	SRP14	0.470936	0.201816	no	no
YDL093W::chr4_1	YDL093W	PMT5	-0.246665	0.73198	no	no
YDL094C::chr4_1	YDL094C	YDL094C	-0.352459	0.797624	no	no
YDL095W::chr4_1	YDL095W	PMT1	-0.658791	0.927004	no	no
YDL096C::chr4_2	YDL096C	OPI6	-0.39669	0.82194	no	no
YDL097C::chr4_2	YDL097C	RPN6	-0.211829	0.708233	no	no
YDL098C::chr4_2	YDL098C	SNU23	-0.888211	0.972487	no	no
YDL099W::chr4_2	YDL099W	BUG1	-0.0726353	0.604958	no	no
YDL100C::chr4_2	YDL100C	GET3	-0.775044	0.954427	no	no
YDL101C::chr4_2	YDL101C	DUN1	-0.0660925	0.599845	no	no
YDL102W::chr4_2	YDL102W	POL3	0.485076	0.193849	no	no
YDL103C::chr4_2	YDL103C	QRI1	-0.259085	0.740204	no	no
YDL104C::chr4_2	YDL104C	QRI7	0.422129	0.230785	no	no
YDL105W::chr4_2	YDL105W	NSE4	0.825485	0.0601496	no	no
YDL106C::chr4_2	YDL106C	PHO2	0.356	0.273496	no	no
YDL107W::chr4_2	YDL107W	MSS2	-0.745212	0.948337	no	no
YDL108W::chr4_2	YDL108W	KIN28	-0.0484386	0.585964	no	no
YDL109C::chr4_2	YDL109C	YDL109C	-0.71427	0.941355	no	no
YDL110C::chr4_2	YDL110C	TMA17	-0.179551	0.685391	no	no
YDL111C::chr4_2	YDL111C	RRP42	-0.137673	0.654677	no	no
YDL112W::chr4_2	YDL112W	TRM3	0.0581899	0.500451	no	no
YDL113C::chr4_2	YDL113C	ATG20	-1.07842	0.989391	no	no
YDL114W::chr4_2	YDL114W	YDL114W	0.281092	0.326175	no	no
YDL115C::chr4_2	YDL115C	IWR1	-0.111735	0.635112	no	no
YDL116W::chr4_2	YDL116W	NUP84	0.121067	0.44976	no	no
YDL117W::chr4_2	YDL117W	CYK3	0.133602	0.439726	no	no
YDL118W::chr4_2	YDL118W	YDL118W	0.431407	0.225106	no	no
YDL119C::chr4_2	YDL119C	YDL119C	-0.574131	0.900132	no	no
YDL120W::chr4_2	YDL120W	YFH1	0.0180383	0.532869	no	no
YDL121C::chr4_2	YDL121C	YDL121C	-0.286193	0.757693	no	no
YDL122W::chr4_2	YDL122W	UBP1	-0.91909	0.976218	no	no
YDL123W::chr4_2	YDL123W	SNA4	0.367755	0.265628	no	no
YDL124W::chr4_2	YDL124W	YDL124W	0.286209	0.322446	no	no
YDL125C::chr4_2	YDL125C	HNT1	-0.145736	0.660678	no	no
YDL126C::chr4_2	YDL126C	CDC48	-0.424203	0.836094	no	no
YDL127W::chr4_2	YDL127W	PCL2	-0.187804	0.691304	no	no
YDL128W::chr4_2	YDL128W	VCX1	-0.212231	0.708512	no	no
YDL129W::chr4_2	YDL129W	YDL129W	0.642304	0.11853	no	no
YDL130W::chr4_2	YDL130W	RPP1B	0.6538	0.113974	no	no
YDL130W-A::chr00_2	YDL130W-A	STF1	0.0688371	0.491846	no	no
YDL131W::chr4_2	YDL131W	LYS21	-0.179551	0.685391	no	no
YDL132W::chr4_2	YDL132W	CDC53	0.197817	0.389059	no	no
YDL133C-A::chr00_14	YDL133C-A	RPL41B	-0.757627	0.950946	no	no
YDL133W::chr4_2	YDL133W	SRF1	-0.552911	0.892385	no	no
YDL134C::chr4_2	YDL134C	PPH21	-0.128944	0.648135	no	no
YDL134C-A::chr4_2	YDL133C-A	RPL41B	-0.924737	0.976852	no	no
YDL135C::chr4_2	YDL135C	RDI1	-0.21517	0.710552	no	no
YDL136W::chr4_2	YDL136W	RPL35B	-0.684786	0.934032	no	no
YDL137W::chr4_2	YDL137W	ARF2	-0.0498074	0.587045	no	no
YDL138W::chr4_2	YDL138W	RGT2	0.135206	0.438444	no	no
YDL139C::chr4_2	YDL139C	SCM3	-0.123808	0.644266	no	no
YDL140C::chr4_2	YDL140C	RPO21	0.433031	0.224121	no	no
YDL141W::chr4_2	YDL141W	BPL1	0.0215314	0.530054	no	no
YDL142C::chr4_2	YDL142C	CRD1	0.23552	0.36011	no	no
YDL143W::chr4_2	YDL143W	CCT4	-0.749165	0.949179	no	no
YDL144C::chr4_2	YDL144C	YDL144C	0.753335	0.0796643	no	no
YDL146W::chr4_2	YDL146W	LDB17	0.110689	0.458093	no	no
YDL147W::chr4_2	YDL147W	RPN5	-0.385239	0.815829	no	no
YDL148C::chr4_2	YDL148C	NOP14	0.117747	0.452424	no	no
YDL149W::chr4_2	YDL149W	ATG9	0.120279	0.450393	no	no
YDL150W::chr4_2	YDL150W	RPC53	-0.0726353	0.604958	no	no
YDL151C::chr4_2	YDL151C	BUD30	0.431407	0.225106	no	no
YDL152W::chr4_2	YDL152W	YDL152W	-0.0402138	0.57946	no	no
YDL153C::chr4_2	YDL153C	SAS10	-0.083166	0.61315	no	no
YDL154W::chr4_2	YDL154W	MSH5	-0.68225	0.93337	no	no
YDL155W::chr4_2	YDL155W	CLB3	-0.708479	0.939969	no	no
YDL156W::chr4_2	YDL156W	CMR1	-0.118508	0.640258	no	no
YDL157C::chr4_2	YDL157C	YDL157C	-0.390117	0.818448	no	no
YDL158C::chr4_2	YDL158C	YDL158C	-0.0777878	0.608972	no	no
YDL159W::chr4_2	YDL159W	STE7	0.00487406	0.543461	no	no
YDL160C::chr4_2	YDL160C	DHH1	-0.389623	0.818184	no	no
YDL161W::chr4_2	YDL161W	ENT1	0.861212	0.0519846	no	no
YDL162C::chr4_2	YDL162C	YDL162C	-0.98363	0.982657	no	no
YDL163W::chr4_2	YDL163W	YDL163W	-0.307666	0.77108	no	no
YDL164C::chr4_2	YDL164C	CDC9	0.328837	0.292107	no	no
YDL165W::chr4_2	YDL165W	CDC36	0.289679	0.319928	no	no
YDL166C::chr4_2	YDL166C	FAP7	0.333432	0.288918	no	no
YDL167C::chr4_2	YDL167C	NRP1	0.446674	0.215936	no	no
YDL168W::chr4_2	YDL168W	SFA1	-0.602145	0.909725	no	no
YDL169C::chr4_2	YDL169C	UGX2	-0.599454	0.908835	no	no
YDL170W::chr4_2	YDL170W	UGA3	0.320003	0.298285	no	no
YDL171C::chr4_2	YDL171C	GLT1	0.0558981	0.502304	no	no
YDL172C::chr4_2	YDL172C	YDL172C	0.139226	0.435235	no	no
YDL173W::chr4_2	YDL173W	PAR32	0.224956	0.368148	no	no
YDL174C::chr4_2	YDL174C	DLD1	-0.0332611	0.573944	no	no
YDL175C::chr4_2	YDL175C	AIR2	0.288667	0.320662	no	no
YDL176W::chr4_2	YDL176W	YDL176W	-0.532067	0.884362	no	no
YDL177C::chr4_2	YDL177C	YDL177C	0.623567	0.126228	no	no
YDL178W::chr4_2	YDL178W	DLD2	-0.135019	0.652693	no	no
YDL179W::chr4_2	YDL179W	PCL9	-0.124078	0.64447	no	no
YDL180W::chr4_2	YDL180W	YDL180W	-0.172664	0.68042	no	no
YDL181W::chr4_2	YDL181W	INH1	-0.479325	0.862191	no	no
YDL182W::chr4_2	YDL182W	LYS20	-0.135633	0.653152	no	no
YDL183C::chr4_2	YDL183C	YDL183C	-0.0744837	0.6064	no	no
YDL184C::chr4_2	YDL184C	RPL41A	-0.236017	0.724826	no	no
YDL185W::chr4_2	YDL185W	VMA1	-0.111735	0.635112	no	no
YDL186W::chr4_2	YDL186W	YDL186W	0.452166	0.212691	no	no
YDL187C::chr4_2	YDL187C	YDL187C	0.360797	0.270271	no	no
YDL189W::chr4_2	YDL189W	RBS1	-0.365451	0.804965	no	no
YDL190C::chr4_2	YDL190C	UFD2	0.0998085	0.466849	no	no
YDL191W::chr4_3	YDL191W	RPL35A	1.46757	0.0021554	no	no
YDL194W::chr00_16b	YDL194W	SNF3	-0.325736	0.782016	no	no
YDL195W::chr4_3	YDL195W	SEC31	0.119463	0.451047	no	no
YDL196W::chr4_3	YDL196W	YDL196W	-0.191182	0.69371	no	no
YDL197C::chr4_3	YDL197C	ASF2	-0.343128	0.792252	no	no
YDL200C::chr4_3	YDL200C	MGT1	0.123979	0.447426	no	no
YDL201W::chr4_3	YDL201W	TRM8	-0.895758	0.973441	no	no
YDL202W::chr4_3	YDL202W	MRPL11	-0.0660925	0.599845	no	no
YDL203C::chr4_3	YDL203C	ACK1	0.309235	0.305894	no	no
YDL204W::chr4_3	YDL204W	RTN2	0.0139459	0.536165	no	no
YDL205C::chr4_3	YDL205C	HEM3	0.390765	0.250565	no	no
YDL206W::chr4_3	YDL206W	YDL206W	0.553343	0.158143	no	no
YDL208W::chr4_3	YDL208W	NHP2	0.517481	0.176326	no	no
YDL209C::chr4_3	YDL209C	CWC2	-0.323767	0.780839	no	no
YDL210W::chr4_3	YDL210W	UGA4	-0.172664	0.68042	no	no
YDL211C::chr4_3	YDL211C	YDL211C	0.116394	0.45351	no	no
YDL212W::chr4_3	YDL212W	SHR3	0.500948	0.185137	no	no
YDL214C::chr4_3	YDL214C	PRR2	-0.236884	0.725411	no	no
YDL215C::chr4_3	YDL215C	GDH2	-0.131187	0.649821	no	no
YDL216C::chr4_3	YDL216C	RRI1	0.390765	0.250565	no	no
YDL217C::chr4_3	YDL217C	TIM22	-1.12113	0.99159	no	no
YDL218W::chr4_3	YDL218W	YDL218W	0.168373	0.412112	no	no
YDL219W::chr4_3	YDL219W	DTD1	-0.324117	0.781049	no	no
YDL220C::chr4_3	YDL220C	CDC13	-0.968898	0.981336	no	no
YDL221W::chr4_3	YDL221W	YDL221W	0.338298	0.285558	no	no
YDL222C::chr4_3	YDL222C	FMP45	0.0917515	0.473343	no	no
YDL224C::chr4_3	YDL224C	WHI4	0.856429	0.0530238	no	no
YDL225W::chr4_3	YDL225W	SHS1	-0.578861	0.901802	no	no
YDL226C::chr4_3	YDL226C	GCS1	-0.532067	0.884362	no	no
YDL227C::chr4_3	YDL227C	HO	-0.931163	0.977556	no	no
YDL229W::chr4_3	YDL229W	SSB1	0.105637	0.462156	no	no
YDL230W::chr4_3	YDL230W	PTP1	-0.0540196	0.590365	no	no
YDL231C::chr4_3	YDL231C	BRE4	-0.0431313	0.58177	no	no
YDL232W::chr4_3	YDL232W	OST4	-0.08591	0.615277	no	no
YDL233W::chr4_3	YDL233W	YDL233W	0.788482	0.0696309	no	no
YDL234C::chr4_3	YDL234C	GYP7	0.416732	0.234126	no	no
YDL235C::chr4_3	YDL235C	YPD1	0.00706936	0.541697	no	no
YDL236W::chr4_3	YDL236W	PHO13	0.215207	0.375619	no	no
YDL237W::chr4_3	YDL237W	AIM6	0.28385	0.324163	no	no
YDL238C::chr4_3	YDL238C	GUD1	-0.654749	0.925862	no	no
YDL239C::chr4_3	YDL239C	ADY3	0.166465	0.413618	no	no
YDL240W::chr4_3	YDL240W	LRG1	-0.448299	0.847872	no	no
YDL242W::chr4_3	YDL242W	YDL242W	-0.0946616	0.622035	no	no
YDL243C::chr4_3	YDL243C	AAD4	-0.338587	0.789607	no	no
YDR001C::chr4_3	YDR001C	NTH1	-0.131187	0.649821	no	no
YDR002W::chr4_3	YDR002W	YRB1	1.61122	0.000828939	yes	yes
YDR003W::chr4_3	YDR003W	RCR2	0.78135	0.071584	no	no
YDR004W::chr4_3	YDR004W	RAD57	-0.519683	0.879399	no	no
YDR005C::chr4_3	YDR005C	MAF1	0.168373	0.412112	no	no
YDR006C::chr4_3	YDR006C	SOK1	1.08591	0.0187088	no	no
YDR007W::chr00_16b	YDR007W	TRP1	-1.26047	0.99624	no	no
YDR008C::chr4_3	YDR008C	YDR008C	0.237362	0.358714	no	no
YDR009W::chr4_3	YDR009W	GAL3	-0.719152	0.942503	no	no
YDR010C::chr4_3	YDR010C	YDR010C	-0.568593	0.898151	no	no
YDR011W::chr4_3	YDR011W	SNQ2	-0.3462	0.79403	no	no
YDR013W::chr4_3	YDR013W	PSF1	0.0903703	0.474457	no	no
YDR014W::chr4_3	YDR014W	RAD61	-0.724712	0.943789	no	no
YDR015C::chr4_3	YDR015C	YDR015C	-0.41659	0.832252	no	no
YDR016C::chr4_3	YDR016C	DAD1	0.555396	0.157141	no	no
YDR017C::chr4_3	YDR017C	KCS1	-0.41659	0.832252	no	no
YDR018C::chr4_3	YDR018C	YDR018C	-1.17955	0.993946	no	no
YDR019C::chr4_3	YDR019C	GCV1	-0.00565661	0.551912	no	no
YDR020C::chr4_3	YDR020C	DAS2	-0.672929	0.930894	no	no
YDR021W::chr4_3	YDR021W	FAL1	-0.65018	0.924555	no	no
YDR022C::chr4_3	YDR022C	CIS1	0.232503	0.362399	no	no
YDR023W::chr4_3	YDR023W	SES1	-0.246665	0.73198	no	no
YDR024W::chr4_3	YDR024W	FYV1	0.546884	0.161323	no	no
YDR025W::chr4_3	YDR025W	RPS11A	-1.24666	0.995915	no	no
YDR026C::chr4_3	YDR026C	NSI1	-0.515154	0.877546	no	no
YDR027C::chr4_3	YDR027C	VPS54	-0.469057	0.857558	no	no
YDR028C::chr4_3	YDR028C	REG1	-0.298753	0.765574	no	no
YDR029W::chr4_3	YDR029W	YDR029W	0.249293	0.349722	no	no
YDR030C::chr4_3	YDR030C	RAD28	-0.975136	0.981906	no	no
YDR031W::chr4_3	YDR031W	MIC14	-0.459658	0.853225	no	no
YDR032C::chr4_3	YDR032C	PST2	0.39346	0.248831	no	no
YDR034C::chr4_3	YDR034C	LYS14	-0.144012	0.659398	no	no
YDR035W::chr4_3	YDR035W	ARO3	0.71635	0.0913651	no	no
YDR036C::chr4_3	YDR036C	EHD3	0.0202742	0.531068	no	no
YDR037W::chr4_3	YDR037W	KRS1	-0.127083	0.646735	no	no
YDR041W::chr00_16b	YDR041W	RSM10	0.462104	0.206891	no	no
YDR042C::chr4_3	YDR042C	YDR042C	-0.831627	0.964387	no	no
YDR043C::chr4_3	YDR043C	NRG1	0.0688371	0.491846	no	no
YDR044W::chr4_3	YDR044W	HEM13	0.373487	0.261832	no	no
YDR045C::chr4_3	YDR045C	RPC11	-0.256512	0.738512	no	no
YDR046C::chr4_3	YDR046C	BAP3	0.338298	0.285558	no	no
YDR047W::chr4_3	YDR047W	HEM12	-1.02066	0.98563	no	no
YDR048C::chr00_16b	YDR048C	YDR048C	-0.687237	0.934666	no	no
YDR049W::chr4_4	YDR049W	VMS1	0.130898	0.441887	no	no
YDR050C::chr00_11	YDR050C	TPI1	-0.301112	0.767039	no	no
YDR050C::chr4_4	YDR050C	TPI1	-0.20913	0.706353	no	no
YDR051C::chr4_4	YDR051C	DET1	0.212767	0.377496	no	no
YDR052C::chr4_4	YDR052C	DBF4	-0.0953482	0.622564	no	no
YDR053W::chr4_4	YDR053W	YDR053W	-0.168662	0.677517	no	no
YDR054C::chr4_4	YDR054C	CDC34	0.524449	0.172693	no	no
YDR055W::chr4_4	YDR055W	PST1	-1.41659	0.998602	no	no
YDR056C::chr4_4	YDR056C	YDR056C	0.289256	0.320235	no	no
YDR057W::chr4_4	YDR057W	YOS9	0.347688	0.279128	no	no
YDR059C::chr4_4	YDR059C	UBC5	-0.0686664	0.601859	no	no
YDR060W::chr4_4	YDR060W	MAK21	-0.617502	0.914685	no	no
YDR061W::chr4_4	YDR061W	YDR061W	-0.153555	0.66646	no	no
YDR062W::chr4_4	YDR062W	LCB2	-0.647203	0.923693	no	no
YDR063W::chr4_4	YDR063W	AIM7	-0.547834	0.890469	no	no
YDR064W::chr4_4	YDR064W	RPS13	1.16837	0.0122798	no	no
YDR065W::chr4_4	YDR065W	RRG1	0.0573415	0.501137	no	no
YDR066C::chr4_4	YDR066C	RTR2	0.0195094	0.531684	no	no
YDR067C::chr4_4	YDR067C	OCA6	0.452166	0.212691	no	no
YDR068W::chr4_4	YDR068W	DOS2	-1.11174	0.991144	no	no
YDR069C::chr4_4	YDR069C	DOA4	-0.648763	0.924145	no	no
YDR070C::chr4_4	YDR070C	FMP16	0.391074	0.250366	no	no
YDR071C::chr00_11	YDR071C	PAA1	-0.497208	0.870012	no	no
YDR072C::chr4_4	YDR072C	IPT1	-0.262262	0.742287	no	no
YDR073W::chr4_4	YDR073W	SNF11	-0.658791	0.927004	no	no
YDR074W::chr00_11	YDR074W	TPS2	0.217282	0.374025	no	no
YDR075W::chr4_4	YDR075W	PPH3	0.176918	0.405386	no	no
YDR076W::chr4_4	YDR076W	RAD55	0.0979835	0.468319	no	no
YDR077W::chr4_4	YDR077W	SED1	0.236567	0.359316	yes	yes
YDR078C::chr4_4	YDR078C	SHU2	0.739006	0.0840552	no	no
YDR079W::chr4_4	YDR079W	PET100	-0.617502	0.914685	no	no
YDR080W::chr4_4	YDR080W	VPS41	-0.443062	0.845361	no	no
YDR081C::chr4_4	YDR081C	PDC2	0.130898	0.441887	no	no
YDR083W::chr4_4	YDR083W	RRP8	-0.393506	0.820254	no	no
YDR084C::chr4_4	YDR084C	TVP23	0.832502	0.0584713	no	no
YDR085C::chr4_4	YDR085C	AFR1	-0.0629528	0.597385	no	no
YDR086C::chr4_4	YDR086C	SSS1	-0.694124	0.936424	no	no
YDR087C::chr4_4	YDR087C	RRP1	1.04741	0.0225794	no	no
YDR088C::chr4_4	YDR088C	SLU7	-0.379115	0.812507	no	no
YDR089W::chr4_4	YDR089W	YDR089W	-0.0484386	0.585964	no	no
YDR090C::chr4_4	YDR090C	YDR090C	0.37859	0.258477	no	no
YDR091C::chr4_4	YDR091C	RLI1	-0.358874	0.801269	no	no
YDR092W::chr4_4	YDR092W	UBC13	-0.570944	0.898995	no	no
YDR093W::chr4_4	YDR093W	DNF2	0.635314	0.121362	no	no
YDR094W::chr4_4	YDR094W	YDR094W	-0.379115	0.812507	no	no
YDR095C::chr4_4	YDR095C	YDR095C	0.320376	0.298023	no	no
YDR096W::chr4_4	YDR096W	GIS1	-0.246665	0.73198	no	no
YDR097C::chr4_4	YDR097C	MSH6	-0.0540196	0.590365	no	no
YDR098C::chr4_4	YDR098C	GRX3	0.215679	0.375256	no	no
YDR099W::chr4_4	YDR099W	BMH2	0.0979835	0.468319	no	no
YDR101C::chr4_4	YDR101C	ARX1	0.325914	0.294145	no	no
YDR102C::chr4_4	YDR102C	YDR102C	-0.568593	0.898151	no	no
YDR104C::chr4_4	YDR104C	SPO71	-0.117029	0.639136	no	no
YDR105C::chr4_4	YDR105C	TMS1	-0.114862	0.637491	no	no
YDR107C::chr4_4	YDR107C	TMN2	-0.131187	0.649821	no	no
YDR108W::chr4_4	YDR108W	TRS85	-0.0795547	0.610346	no	no
YDR109C::chr4_4	YDR109C	YDR109C	0.415013	0.235195	no	no
YDR110W::chr4_4	YDR110W	FOB1	-0.638982	0.921275	no	no
YDR111C::chr4_4	YDR111C	ALT2	-0.308065	0.771325	no	no
YDR112W::chr4_4	YDR112W	IRC2	-0.475483	0.860469	no	no
YDR113C::chr4_4	YDR113C	PDS1	0.477701	0.19798	no	no
YDR114C::chr4_4	YDR114C	YDR114C	-0.00671391	0.552759	no	no
YDR115W::chr4_4	YDR115W	YDR115W	-0.381824	0.813981	no	no
YDR116C::chr4_4	YDR116C	MRPL1	0.510281	0.18013	no	no
YDR117C::chr4_4	YDR117C	TMA64	-0.142877	0.658554	no	no
YDR118W::chr4_4	YDR118W	APC4	0.0130946	0.53685	no	no
YDR119W::chr4_4	YDR119W	VBA4	0.0859106	0.478055	no	no
YDR120C::chr4_4	YDR120C	TRM1	0.211351	0.378586	no	no
YDR121W::chr4_4	YDR121W	DPB4	-0.953618	0.979876	no	no
YDR122W::chr4_4	YDR122W	KIN1	-0.388021	0.817325	no	no
YDR123C::chr4_4	YDR123C	INO2	0.0737359	0.487887	no	no
YDR124W::chr4_4	YDR124W	YDR124W	0.287672	0.321384	no	no
YDR125C::chr4_4	YDR125C	ECM18	-0.638982	0.921275	no	no
YDR126W::chr4_4	YDR126W	SWF1	0.374824	0.260952	no	no
YDR127W::chr4_4	YDR127W	ARO1	0.874642	0.0491535	no	no
YDR128W::chr4_4	YDR128W	MTC5	0.530943	0.169351	no	no
YDR130C::chr4_4	YDR130C	FIN1	-1.19841	0.99457	no	no
YDR131C::chr4_4	YDR131C	YDR131C	0.279404	0.327408	no	no
YDR132C::chr4_4	YDR132C	YDR132C	-0.16025	0.671378	no	no
YDR133C::chr4_4	YDR133C	YDR133C	0.345251	0.28079	no	no
YDR134C::chr4_4	YDR134C	YDR134C	0.0752634	0.486653	no	no
YDR135C::chr4_4	YDR135C	YCF1	-0.182702	0.687654	no	no
YDR136C::chr4_4	YDR136C	VPS61	-0.528235	0.882842	no	no
YDR137W::chr4_4	YDR137W	RGP1	-0.121134	0.642245	no	no
YDR138W::chr4_4	YDR138W	HPR1	-0.0242723	0.566792	no	no
YDR139C::chr4_4	YDR139C	RUB1	-0.591899	0.906299	no	no
YDR140W::chr4_4	YDR140W	MTQ2	-0.0295666	0.571007	no	no
YDR141C::chr4_4	YDR141C	DOP1	-0.0782672	0.609345	no	no
YDR142C::chr4_4	YDR142C	PEX7	-0.0540196	0.590365	no	no
YDR143C::chr4_4	YDR143C	SAN1	-1.24666	0.995915	no	no
YDR144C::chr4_4	YDR144C	MKC7	-0.233726	0.723274	no	no
YDR145W::chr4_4	YDR145W	TAF12	0.608945	0.132473	no	no
YDR146C::chr4_4	YDR146C	SWI5	0.0163697	0.534213	no	no
YDR147W::chr4_5	YDR147W	EKI1	-0.261615	0.741864	no	no
YDR148C::chr4_5	YDR148C	KGD2	0.0956164	0.470227	no	no
YDR149C::chr4_5	YDR149C	YDR149C	0.168373	0.412112	no	no
YDR150W::chr4_5	YDR150W	NUM1	-0.236884	0.725411	no	no
YDR151C::chr4_5	YDR151C	CTH1	-0.251004	0.734868	no	no
YDR152W::chr4_5	YDR152W	GIR2	-0.543502	0.888814	no	no
YDR153C::chr4_5	YDR153C	ENT5	-0.444604	0.846104	no	no
YDR154C::chr4_5	YDR154C	YDR154C	0.148473	0.427872	no	no
YDR156W::chr4_5	YDR156W	RPA14	-0.251166	0.734976	no	no
YDR157W::chr4_5	YDR157W	YDR157W	-0.526773	0.882258	no	no
YDR158W::chr4_5	YDR158W	HOM2	0.618654	0.128303	yes	yes
YDR159W::chr4_5	YDR159W	SAC3	0.261482	0.340621	no	no
YDR160W::chr4_5	YDR160W	SSY1	-0.494592	0.868888	no	no
YDR161W::chr4_5	YDR161W	YDR161W	0.146678	0.4293	no	no
YDR162C::chr4_5	YDR162C	NBP2	-0.227556	0.719074	no	no
YDR163W::chr4_5	YDR163W	CWC15	0.221812	0.370552	no	no
YDR164C::chr4_5	YDR164C	SEC1	0.305876	0.308285	no	no
YDR166C::chr4_5	YDR166C	SEC5	-0.0868843	0.616031	no	no
YDR167W::chr4_5	YDR167W	TAF10	0.304739	0.309097	yes	yes
YDR169C::chr4_5	YDR169C	STB3	-1.25613	0.996141	no	no
YDR171W::chr4_5	YDR171W	HSP42	-0.0498074	0.587045	no	no
YDR172W::chr4_5	YDR172W	SUP35	-0.129709	0.64871	no	no
YDR173C::chr4_5	YDR173C	ARG82	0.20837	0.380886	yes	yes
YDR174W::chr00_14	YDR174W	HMO1	0.0802419	0.482632	no	no
YDR176W::chr4_5	YDR176W	NGG1	0.736749	0.0847633	yes	yes
YDR177W::chr4_5	YDR177W	UBC1	0.0263538	0.526166	no	no
YDR178W::chr4_5	YDR178W	SDH4	0.295752	0.315541	no	no
YDR180W::chr4_5	YDR180W	SCC2	-0.483704	0.864135	no	no
YDR181C::chr4_5	YDR181C	SAS4	0.168373	0.412112	no	no
YDR184C::chr4_5	YDR184C	ATC1	-0.102929	0.628386	no	no
YDR185C::chr4_5	YDR185C	UPS3	0.0463823	0.509995	no	no
YDR186C::chr4_5	YDR186C	YDR186C	-0.669876	0.930068	no	no
YDR187C::chr4_5	YDR187C	YDR187C	-0.0121995	0.557151	no	no
YDR189W::chr4_5	YDR189W	SLY1	-0.475483	0.860469	no	no
YDR190C::chr4_5	YDR190C	RVB1	-0.121134	0.642245	no	no
YDR191W::chr4_5	YDR191W	HST4	-0.216291	0.711328	no	no
YDR192C::chr4_5	YDR192C	NUP42	0.502792	0.184141	no	no
YDR194C::chr4_5	YDR194C	MSS116	0.394649	0.248068	no	no
YDR195W::chr4_5	YDR195W	REF2	0.203138	0.384931	no	no
YDR196C::chr4_5	YDR196C	CAB5	-0.0394321	0.57884	no	no
YDR197W::chr4_5	YDR197W	CBS2	0.00236284	0.545478	no	no
YDR198C::chr4_5	YDR198C	RKM2	-0.864049	0.969239	no	no
YDR201W::chr4_5	YDR201W	SPC19	-0.73433	0.945961	no	no
YDR202C::chr00_14	YDR202C	RAV2	-0.41064	0.82921	no	no
YDR203W::chr4_5	YDR203W	YDR203W	0.470936	0.201816	no	no
YDR204W::chr4_5	YDR204W	COQ4	0.18652	0.397862	no	no
YDR205W::chr00_14	YDR205W	MSC2	-0.425635	0.83681	no	no
YDR207C::chr4_5	YDR207C	UME6	-0.0767397	0.608157	no	no
YDR208W::chr4_5	YDR208W	MSS4	0.078175	0.484301	no	no
YDR209C::chr4_5	YDR209C	YDR209C	0.18586	0.398378	no	no
YDR210W::chr4_5	YDR210W	YDR210W	0.0874528	0.476811	no	no
YDR211W::chr4_5	YDR211W	GCD6	-0.469057	0.857558	no	no
YDR213W::chr4_5	YDR213W	UPC2	-0.674902	0.931424	no	no
YDR214W::chr4_5	YDR214W	AHA1	0.0102913	0.539106	yes	yes
YDR216W::chr4_5	YDR216W	ADR1	-0.382642	0.814425	no	no
YDR218C::chr4_5	YDR218C	SPR28	0.216467	0.374651	no	no
YDR219C::chr4_5	YDR219C	MFB1	0.467933	0.203533	no	no
YDR220C::chr4_5	YDR220C	YDR220C	-0.31316	0.774437	no	no
YDR221W::chr4_5	YDR221W	GTB1	-0.153555	0.66646	no	no
YDR222W::chr4_5	YDR222W	YDR222W	-0.898741	0.973811	no	no
YDR224C::chr4_5	YDR224C	HTB1	-1.00155	0.984156	no	no
YDR228C::chr4_5	YDR228C	PCF11	-0.0380781	0.577767	no	no
YDR229W::chr4_5	YDR229W	IVY1	-0.317054	0.7768	no	no
YDR230W::chr4_5	YDR230W	YDR230W	-0.0242723	0.566792	no	no
YDR231C::chr4_5	YDR231C	COX20	0.70191	0.0962639	yes	yes
YDR233C::chr4_5	YDR233C	RTN1	0.975728	0.0315893	no	no
YDR234W::chr4_5	YDR234W	LYS4	0.753335	0.0796643	no	no
YDR235W::chr4_5	YDR235W	PRP42	-0.0629528	0.597385	no	no
YDR237W::chr4_5	YDR237W	MRPL7	-0.246665	0.73198	no	no
YDR238C::chr4_5	YDR238C	SEC26	0.0308693	0.522523	no	no
YDR239C::chr4_5	YDR239C	YDR239C	0.267908	0.33586	no	no
YDR241W::chr4_5	YDR241W	BUD26	-0.21865	0.712959	no	no
YDR242W::chr00_17a	YDR242W	AMD2	-0.220669	0.714351	no	no
YDR243C::chr4_6	YDR243C	PRP28	0.348945	0.278273	no	no
YDR244W::chr4_6	YDR244W	PEX5	0.370007	0.264133	no	no
YDR246W::chr4_6	YDR246W	TRS23	0.0587483	0.5	no	no
YDR248C::chr4_6	YDR248C	YDR248C	1.00487	0.0276198	no	no
YDR249C::chr4_6	YDR249C	YDR249C	0.0480786	0.508624	no	no
YDR250C::chr4_6	YDR250C	YDR250C	1.15179	0.013392	yes	yes
YDR251W::chr4_6	YDR251W	PAM1	0.479574	0.196925	no	no
YDR253C::chr4_6	YDR253C	MET32	0.328837	0.292107	no	no
YDR254W::chr4_6	YDR254W	CHL4	0.7278	0.0876139	no	no
YDR256C::chr4_6	YDR256C	CTA1	-0.0726353	0.604958	no	no
YDR258C::chr4_6	YDR258C	HSP78	0.796404	0.0675098	no	no
YDR259C::chr4_6	YDR259C	YAP6	1.28385	0.0065281	no	no
YDR260C::chr4_6	YDR260C	SWM1	0.145318	0.430382	yes	yes
YDR261C::chr4_6	YDR261C	EXG2	0.0943722	0.47123	no	no
YDR263C::chr4_6	YDR263C	DIN7	0.168373	0.412112	no	no
YDR264C::chr4_6	YDR264C	AKR1	-0.305558	0.769785	no	no
YDR265W::chr4_6	YDR265W	PEX10	0.611218	0.131488	yes	yes
YDR268W::chr4_6	YDR268W	MSW1	0.736749	0.0847633	yes	yes
YDR269C::chr4_6	YDR269C	YDR269C	0.611218	0.131488	yes	yes
YDR272W::chr4_6	YDR272W	GLO2	0.168373	0.412112	no	no
YDR273W::chr4_6	YDR273W	DON1	0.399698	0.244841	no	no
YDR275W::chr4_6	YDR275W	BSC2	0.959141	0.0340514	yes	yes
YDR276C::chr4_6	YDR276C	PMP3	0.275288	0.330425	no	no
YDR278C::chr4_6	YDR278C	YDR278C	1.05868	0.0213824	yes	yes
YDR281C::chr4_6	YDR281C	PHM6	-0.223945	0.716602	no	no
YDR286C::chr4_6	YDR286C	YDR286C	0.540342	0.164587	no	no
YDR287W::chr4_6	YDR287W	INM2	0.28385	0.324163	no	no
YDR288W::chr4_6	YDR288W	NSE3	0.905338	0.0431439	no	no
YDR289C::chr4_6	YDR289C	RTT103	0.227229	0.366414	yes	yes
YDR290W::chr4_6	YDR290W	YDR290W	0.852226	0.0539504	yes	yes
YDR291W::chr4_6	YDR291W	HRQ1	0.778426	0.0723967	no	no
YDR293C::chr4_6	YDR293C	SSD1	-0.0242723	0.566792	no	no
YDR294C::chr4_6	YDR294C	DPL1	0.374824	0.260952	no	no
YDR295C::chr4_6	YDR295C	HDA2	0.753335	0.0796643	no	no
YDR296W::chr4_6	YDR296W	MHR1	1.00487	0.0276198	no	no
YDR297W::chr4_6	YDR297W	SUR2	-0.749165	0.949179	no	no
YDR299W::chr4_6	YDR299W	BFR2	0.267908	0.33586	no	no
YDR300C::chr4_6	YDR300C	PRO1	0.505408	0.182734	no	no
YDR302W::chr4_6	YDR302W	GPI11	1.23925	0.00838151	yes	yes
YDR303C::chr4_6	YDR303C	RSC3	0.189261	0.395721	yes	yes
YDR304C::chr4_6	YDR304C	CPR5	0.299617	0.312762	no	no
YDR305C::chr4_6	YDR305C	HNT2	0.168373	0.412112	no	no
YDR306C::chr4_6	YDR306C	YDR306C	0.502792	0.184141	no	no
YDR307W::chr4_6	YDR307W	YDR307W	0.448481	0.214865	no	no
YDR310C::chr4_6	YDR310C	SUM1	0.305876	0.308285	no	no
YDR312W::chr4_6	YDR312W	SSF2	0.905338	0.0431439	no	no
YDR313C::chr4_6	YDR313C	PIB1	-0.379115	0.812507	no	no
YDR314C::chr4_6	YDR314C	RAD34	-0.0795547	0.610346	no	no
YDR317W::chr4_6	YDR317W	HIM1	-0.372196	0.808711	no	no
YDR320C::chr4_6	YDR320C	SWA2	0.28385	0.324163	no	no
YDR321W::chr4_6	YDR321W	ASP1	1.0529	0.0219898	no	no
YDR324C::chr4_6	YDR324C	UTP4	0.338298	0.285558	no	no
YDR325W::chr4_6	YDR325W	YCG1	1.15179	0.013392	yes	yes
YDR326C::chr00_17a	YDR326C	YSP2	0.0558981	0.502304	no	no
YDR327W::chr4_6	YDR327W	YDR327W	-0.104646	0.6297	no	no
YDR331W::chr4_6	YDR331W	GPI8	-0.609235	0.912041	no	no
YDR332W::chr4_6	YDR332W	IRC3	0.168373	0.412112	no	no
YDR334W::chr4_6	YDR334W	SWR1	-0.246665	0.73198	no	no
YDR338C::chr4_7	YDR338C	YDR338C	0.240523	0.356324	no	no
YDR344C::chr4_7	YDR344C	YDR344C	-0.0795547	0.610346	no	no
YDR345C::chr4_7	YDR345C	HXT3	0.670873	0.107441	no	no
YDR346C::chr4_7	YDR346C	SVF1	-0.499052	0.870801	no	no
YDR347W::chr4_7	YDR347W	MRP1	-0.886075	0.972212	no	no
YDR349C::chr4_7	YDR349C	YPS7	0.627804	0.124457	no	no
YDR350C::chr4_7	YDR350C	ATP22	0.715861	0.091528	no	no
YDR351W::chr4_7	YDR351W	SBE2	0.0688371	0.491846	no	no
YDR352W::chr4_7	YDR352W	YDR352W	-0.0946616	0.622035	no	no
YDR354W::chr4_7	YDR354W	TRP4	0.305876	0.308285	no	no
YDR355C::chr4_7	YDR355C	YDR355C	1.05868	0.0213824	yes	yes
YDR356W::chr4_7	YDR356W	SPC110	-0.568593	0.898151	no	no
YDR359C::chr4_7	YDR359C	EAF1	0.959141	0.0340514	yes	yes
YDR360W::chr4_7	YDR360W	OPI7	0.215679	0.375256	no	no
YDR361C::chr4_7	YDR361C	BCP1	0.168373	0.412112	no	no
YDR362C::chr4_7	YDR362C	TFC6	0.168373	0.412112	no	no
YDR363W-A::chr00_2	YDR363W-A	SEM1	0.566922	0.151591	no	no
YDR365C::chr4_7	YDR365C	ESF1	-0.369284	0.807099	no	no
YDR367W::chr4_7	YDR367W	KEI1	-0.831627	0.964387	no	no
YDR368W::chr4_7	YDR368W	YPR1	0.431407	0.225106	no	no
YDR370C::chr4_7	YDR370C	YDR370C	1.03087	0.0244388	no	no
YDR371W::chr4_7	YDR371W	CTS2	-0.831627	0.964387	no	no
YDR372C::chr4_7	YDR372C	VPS74	0.831338	0.0587472	no	no
YDR376W::chr4_7	YDR376W	ARH1	0.084564	0.479142	yes	yes
YDR378C::chr4_7	YDR378C	LSM6	-0.246665	0.73198	no	no
YDR380W::chr4_7	YDR380W	ARO10	-0.200861	0.700558	no	no
YDR381W::chr4_7	YDR381W	YRA1	0.627804	0.124457	no	no
YDR383C::chr4_7	YDR383C	NKP1	1.58341	0.00100353	no	no
YDR384C::chr4_7	YDR384C	ATO3	0.422946	0.230283	no	no
YDR386W::chr4_7	YDR386W	MUS81	1.23925	0.00838151	yes	yes
YDR389W::chr4_7	YDR389W	SAC7	1.5554	0.00121299	no	no
YDR390C::chr4_7	YDR390C	UBA2	-0.153555	0.66646	no	no
YDR391C::chr4_7	YDR391C	YDR391C	0.409381	0.238718	no	no
YDR393W::chr4_7	YDR393W	SHE9	0.345251	0.28079	no	no
YDR394W::chr4_7	YDR394W	RPT3	0.611218	0.131488	yes	yes
YDR395W::chr4_7	YDR395W	SXM1	-0.329127	0.784034	no	no
YDR396W::chr4_7	YDR396W	YDR396W	0.448481	0.214865	no	no
YDR399W::chr4_7	YDR399W	HPT1	0.0428419	0.512855	no	no
YDR400W::chr4_7	YDR400W	URH1	1.30082	0.00592428	no	no
YDR402C::chr4_7	YDR402C	DIT2	-0.706096	0.939391	no	no
YDR403W::chr4_7	YDR403W	DIT1	0.890839	0.0459041	no	no
YDR405W::chr4_7	YDR405W	MRP20	1.15179	0.013392	yes	yes
YDR406W::chr4_7	YDR406W	PDR15	-0.246665	0.73198	no	no
YDR407C::chr4_7	YDR407C	TRS120	0.50941	0.180594	no	no
YDR409W::chr4_7	YDR409W	SIZ1	0.964839	0.0331883	no	no
YDR411C::chr4_7	YDR411C	DFM1	-0.153555	0.66646	no	no
YDR412W::chr4_7	YDR412W	RRP17	-0.0319259	0.572883	no	no
YDR413C::chr4_7	YDR413C	YDR413C	-0.141967	0.657878	no	no
YDR414C::chr4_7	YDR414C	ERD1	0.402838	0.242846	no	no
YDR416W::chr4_7	YDR416W	SYF1	0.0108315	0.538671	no	no
YDR417C::chr00_17a/chr00_18	YDR417C	YDR417C	1.46793	0.00215041	no	no
YDR419W::chr4_7	YDR419W	RAD30	-0.223314	0.716169	no	no
YDR420W::chr4_7	YDR420W	HKR1	0.0428419	0.512855	no	no
YDR421W::chr4_7	YDR421W	ARO80	0.127731	0.444421	no	no
YDR423C::chr4_7	YDR423C	CAD1	0.551701	0.158947	no	no
YDR424C::chr00_8	YDR424C	DYN2	0.431407	0.225106	no	no
YDR425W::chr4_7	YDR425W	SNX41	0.370007	0.264133	no	no
YDR426C::chr4_7	YDR426C	YDR426C	0.599007	0.136837	no	no
YDR427W::chr00_11	YDR427W	RPN9	0.0108315	0.538671	no	no
YDR427W::chr4_7	YDR427W	RPN9	-0.0242723	0.566792	no	no
YDR428C::chr4_7	YDR428C	BNA7	-1.07955	0.989455	no	no
YDR429C::chr4_7	YDR429C	TIF35	0.56069	0.154575	no	no
YDR430C::chr4_7	YDR430C	CYM1	0.464766	0.205354	no	no
YDR431W::chr4_7	YDR431W	YDR431W	0.277997	0.328438	no	no
YDR432W::chr4_7	YDR432W	NPL3	-0.0622401	0.596826	no	no
YDR433W::chr4_7	YDR433W	YDR433W	0.105637	0.462156	no	no
YDR434W::chr4_7	YDR434W	GPI17	-0.246665	0.73198	no	no
YDR435C::chr4_7	YDR435C	PPM1	0.312763	0.303392	no	no
YDR436W::chr4_7	YDR436W	PPZ2	0.0281951	0.524681	no	no
YDR437W::chr4_8	YDR437W	GPI19	0.376481	0.259862	no	no
YDR438W::chr4_8	YDR438W	THI74	-0.424733	0.836359	no	no
YDR439W::chr4_8	YDR439W	LRS4	0.0351063	0.519103	no	no
YDR440W::chr4_8	YDR440W	DOT1	-0.125358	0.645436	no	no
YDR441C::chr4_8	YDR441C	APT2	0.411644	0.237299	no	no
YDR442W::chr4_8	YDR442W	YDR442W	0.608945	0.132473	no	no
YDR443C::chr4_8	YDR443C	SSN2	-0.0495729	0.58686	no	no
YDR444W::chr00_17a	YDR444W	YDR444W	-0.121134	0.642245	no	no
YDR445C::chr00_14	YDR445C	YDR445C	0.36541	0.267188	no	no
YDR446W::chr4_8	YDR446W	ECM11	0.0943722	0.47123	no	no
YDR447C::chr4_8	YDR447C	RPS17B	0.48397	0.194465	no	no
YDR449C::chr4_8	YDR449C	UTP6	-0.250868	0.734778	no	no
YDR450W::chr4_8	YDR450W	RPS18A	0.975557	0.0316139	no	no
YDR451C::chr4_8	YDR451C	YHP1	0.648366	0.116112	no	no
YDR452W::chr4_8	YDR452W	PPN1	0.293904	0.316874	no	no
YDR453C::chr4_8	YDR453C	TSA2	-0.340091	0.790485	no	no
YDR454C::chr4_8	YDR454C	GUK1	0.0721575	0.489163	no	no
YDR455C::chr4_8	YDR455C	YDR455C	0.551701	0.158947	no	no
YDR456W::chr4_8	YDR456W	NHX1	1.32038	0.00529051	no	no
YDR457W::chr4_8	YDR457W	TOM1	-0.362142	0.803111	no	no
YDR458C::chr4_8	YDR458C	HEH2	0.184288	0.399608	no	no
YDR459C::chr4_8	YDR459C	PFA5	0.670873	0.107441	no	no
YDR460W::chr4_8	YDR460W	TFB3	0.452166	0.212691	no	no
YDR461W::chr00_17a	YDR461W	MFA1	0.250835	0.348566	no	no
YDR462W::chr4_8	YDR462W	MRPL28	0.217459	0.373889	no	no
YDR463W::chr4_8	YDR463W	STP1	0.226088	0.367284	no	no
YDR464W::chr4_8	YDR464W	SPP41	0.0311528	0.522294	no	no
YDR465C::chr4_8	YDR465C	RMT2	0.409381	0.238718	no	no
YDR466W::chr4_8	YDR466W	PKH3	-0.914089	0.975644	no	no
YDR467C::chr4_8	YDR467C	YDR467C	0.342402	0.282739	no	no
YDR468C::chr4_8	YDR468C	TLG1	0.959141	0.0340514	yes	yes
YDR469W::chr4_8	YDR469W	SDC1	0.08091	0.482092	no	no
YDR471W::chr4_8	YDR471W	RPL27B	-0.112626	0.635791	no	no
YDR472W::chr4_8	YDR472W	TRS31	0.275322	0.3304	no	no
YDR473C::chr4_8	YDR473C	PRP3	0.00564329	0.542843	no	no
YDR474C::chr4_8	YDR475C	JIP4	0.0724076	0.48896	no	no
YDR475C::chr4_8	YDR475C	JIP4	0.537607	0.165964	no	no
YDR476C::chr4_8	YDR476C	YDR476C	0.353928	0.274894	no	no
YDR477W::chr4_8	YDR477W	SNF1	0.140892	0.433907	no	no
YDR478W::chr4_8	YDR478W	SNM1	0.00331355	0.544715	no	no
YDR479C::chr4_8	YDR479C	PEX29	-0.00671391	0.552759	no	no
YDR480W::chr4_8	YDR480W	DIG2	-0.398668	0.822982	no	no
YDR481C::chr4_8	YDR481C	PHO8	-0.0933467	0.621022	no	no
YDR482C::chr4_8	YDR482C	CWC21	0.252437	0.347366	no	no
YDR483W::chr4_8	YDR483W	KRE2	0.0200319	0.531263	no	no
YDR485C::chr4_8	YDR485C	VPS72	0.317799	0.299835	no	no
YDR486C::chr4_8	YDR486C	VPS60	0.7278	0.0876139	no	no
YDR487C::chr4_8	YDR487C	RIB3	0.168373	0.412112	no	no
YDR488C::chr4_8	YDR488C	PAC11	-0.113398	0.636378	no	no
YDR489W::chr4_8	YDR489W	SLD5	0.351237	0.276716	no	no
YDR490C::chr4_8	YDR490C	PKH1	0.186751	0.397682	no	no
YDR491C::chr4_8	YDR491C	YDR491C	0.611979	0.13116	no	no
YDR492W::chr4_8	YDR492W	IZH1	-0.0441224	0.582554	no	no
YDR493W::chr00_17a	YDR493W	MZM1	0.198746	0.388337	no	no
YDR494W::chr4_8	YDR494W	RSM28	0.785044	0.0705671	no	no
YDR495C::chr4_8	YDR495C	VPS3	0.0254148	0.526923	no	no
YDR496C::chr4_8	YDR496C	PUF6	-0.384168	0.815251	no	no
YDR497C::chr4_8	YDR497C	ITR1	0.905338	0.0431439	no	no
YDR498C::chr00_17a	YDR498C	SEC20	0.715861	0.091528	no	no
YDR499W::chr4_8	YDR499W	LCD1	0.812229	0.0634227	no	no
YDR500C::chr00_17a	YDR500C	RPL37B	-0.131187	0.649821	no	no
YDR500C::chr4_8	YDR500C	RPL37B	0.438719	0.220687	no	no
YDR502C::chr00_17a	YDR502C	SAM2	-0.35358	0.798264	no	no
YDR503C::chr4_8	YDR503C	LPP1	0.09966	0.466968	no	no
YDR504C::chr4_8	YDR504C	SPG3	0.168373	0.412112	no	no
YDR505C::chr4_8	YDR505C	PSP1	-0.158101	0.669802	no	no
YDR506C::chr00_17a	YDR506C	GMC1	0.594638	0.138786	no	no
YDR508C::chr4_8	YDR508C	GNP1	0.213544	0.376898	no	no
YDR509W::chr4_8	YDR509W	YDR509W	0.382498	0.255924	no	no
YDR510W::chr4_8	YDR510W	SMT3	0.927365	0.0392088	no	no
YDR511W::chr4_8	YDR511W	ACN9	0.0281951	0.524681	no	no
YDR512C::chr00_17a	YDR512C	EMI1	0.0528956	0.504731	no	no
YDR512C::chr4_8	YDR512C	EMI1	0.143711	0.431661	no	no
YDR513W::chr4_8	YDR513W	GRX2	0.394254	0.248321	no	no
YDR514C::chr4_8	YDR514C	YDR514C	0.12183	0.449148	no	no
YDR515W::chr00_17a	YDR515W	SLF1	-0.241271	0.728368	no	no
YDR517W::chr4_8	YDR517W	GRH1	0.675333	0.10578	no	no
YDR519W::chr4_8	YDR519W	FPR2	0.620885	0.127358	no	no
YDR520C::chr4_8	YDR520C	URC2	0.111789	0.457209	no	no
YDR521W::chr4_8	YDR521W	YDR521W	0.212767	0.377496	no	no
YDR522C::chr4_8	YDR522C	SPS2	-0.0351606	0.575452	no	no
YDR523C::chr4_8	YDR523C	SPS1	0.662187	0.11073	no	no
YDR524C::chr4_8	YDR524C	AGE1	0.34084	0.283811	no	no
YDR525W::chr4_8	YDR525W	API2	1.3528	0.00437167	no	no
YDR525W-A::chr00_2	YDR525W-A	SNA2	-0.509699	0.875289	no	no
YDR526C::chr00_17a	YDR526C	YDR526C	-0.00671391	0.552759	no	no
YDR527W::chr4_8	YDR527W	RBA50	0.0660111	0.49413	no	no
YDR528W::chr4_8	YDR528W	HLR1	-1.4837	0.999112	no	no
YDR529C::chr4_8	YDR529C	QCR7	-0.313496	0.774642	no	no
YDR530C::chr4_8	YDR530C	APA2	-0.266564	0.745094	no	no
YDR531W::chr4_8	YDR531W	CAB1	-0.375948	0.810775	no	no
YDR532C::chr4_8	YDR532C	KRE28	0.317236	0.300232	no	no
YDR533C::chr4_8	YDR533C	HSP31	-0.269033	0.746697	no	no
YDR534C::chr4_8	YDR534C	FIT1	0.0308693	0.522523	no	no
YDR536W::chr00_2	YDR536W	STL1	1.85223	0.000139615	yes	yes
YDR537C::chr00_14	YDR537C	YDR537C	0.379877	0.257635	no	no
YDR538W::chr00_2	YDR538W	PAD1	-0.0748984	0.606723	no	no
YDR539W::chr00_2	YDR539W	FDC1	-0.291059	0.760763	no	no
YDR540C::chr00_2	YDR540C	IRC4	-0.126248	0.646107	no	no
YDR541C::chr00_2	YDR541C	YDR541C	0.444007	0.217522	no	no
YEL001C::chr5_2	YEL001C	IRC22	0.168373	0.412112	no	no
YEL002C::chr5_2	YEL002C	WBP1	-0.49059	0.867154	no	no
YEL003W::chr5_2	YEL003W	GIM4	0.377826	0.258979	no	no
YEL004W::chr5_2	YEL004W	YEA4	-0.625176	0.917085	no	no
YEL005C::chr5_2	YEL005C	VAB2	-0.338587	0.789607	no	no
YEL006W::chr5_2	YEL006W	YEA6	0.6538	0.113974	no	no
YEL008W::chr5_2	YEL008W	YEL008W	0.431407	0.225106	no	no
YEL009C::chr5_2	YEL009C	GCN4	-0.317054	0.7768	no	no
YEL010W::chr5_2	YEL010W	YEL010W	-0.100116	0.626229	no	no
YEL012W::chr00_10	YEL012W	UBC8	0.63232	0.12259	no	no
YEL013W::chr5_2	YEL013W	VAC8	0.476495	0.198661	no	no
YEL014C::chr5_2	YEL014C	YEL014C	-0.41659	0.832252	no	no
YEL015W::chr5_2	YEL015W	EDC3	-0.0498074	0.587045	no	no
YEL016C::chr5_2	YEL016C	NPP2	-0.90963	0.975123	no	no
YEL017C-A::chr5_2	YEL017C-A	PMP2	0.356	0.273496	no	no
YEL017W::chr5_2	YEL017W	GTT3	0.119463	0.451047	no	no
YEL018W::chr5_2	YEL018W	EAF5	0.144526	0.431012	no	no
YEL019C::chr5_2	YEL019C	MMS21	0.7278	0.0876139	no	no
YEL020C::chr5_2	YEL020C	YEL020C	-0.125741	0.645724	no	no
YEL023C::chr5_2	YEL023C	YEL023C	-0.552473	0.89222	no	no
YEL024W::chr5_2	YEL024W	RIP1	-0.342589	0.791939	no	no
YEL025C::chr5_2	YEL025C	YEL025C	-0.0295666	0.571007	no	no
YEL026W::chr5_2	YEL026W	SNU13	0.933908	0.0380979	no	no
YEL027W::chr5_2	YEL027W	VMA3	0.0390898	0.515886	no	no
YEL028W::chr5_2	YEL028W	YEL028W	0.374824	0.260952	no	no
YEL029C::chr5_2	YEL029C	BUD16	0.570471	0.149909	no	no
YEL030W::chr5_2	YEL030W	ECM10	-0.162	0.672659	no	no
YEL031W::chr5_2	YEL031W	SPF1	-0.179551	0.685391	no	no
YEL032W::chr5_2	YEL032W	MCM3	0.730252	0.086826	no	no
YEL033W::chr5_2	YEL033W	MTC7	-0.0946616	0.622035	no	no
YEL034W::chr00_8	YEL034W	HYP2	1.06146	0.0210954	no	no
YEL035C::chr5_2	YEL035C	UTR5	0.155045	0.422653	no	no
YEL036C::chr5_2	YEL036C	ANP1	0.914616	0.0414491	no	no
YEL037C::chr5_2	YEL037C	RAD23	-0.109161	0.63315	no	no
YEL038W::chr5_2	YEL038W	UTR4	0.145289	0.430405	no	no
YEL039C::chr5_2	YEL039C	CYC7	-0.668128	0.929592	no	no
YEL040W::chr5_2	YEL040W	UTR2	-0.0795547	0.610346	no	no
YEL042W::chr5_2	YEL042W	GDA1	-0.902017	0.974212	no	no
YEL043W::chr5_2	YEL043W	YEL043W	0.0688371	0.491846	no	no
YEL044W::chr5_2	YEL044W	IES6	-0.083166	0.61315	no	no
YEL045C::chr5_2	YEL045C	YEL045C	-0.0336651	0.574265	no	no
YEL046C::chr5_2	YEL046C	GLY1	0.337361	0.286204	no	no
YEL047C::chr5_2	YEL047C	YEL047C	-0.145127	0.660226	no	no
YEL048C::chr5_2	YEL048C	TCA17	-0.145736	0.660678	no	no
YEL049W::chr5_2	YEL049W	PAU2	0.20154	0.38617	no	no
YEL050C::chr5_2	YEL050C	RML2	-0.113398	0.636378	no	no
YEL051W::chr5_2	YEL051W	VMA8	0.878866	0.0482888	no	no
YEL052W::chr5_2	YEL052W	AFG1	-0.157724	0.669526	no	no
YEL053C::chr5_2	YEL053C	MAK10	0.409381	0.238718	no	no
YEL054C::chr5_2	YEL054C	RPL12A	0.390765	0.250565	no	no
YEL055C::chr5_2	YEL055C	POL5	0.312763	0.303392	no	no
YEL056W::chr5_2	YEL056W	HAT2	0.114602	0.454949	no	no
YEL057C::chr5_2	YEL057C	YEL057C	-0.0380781	0.577767	no	no
YEL058W::chr5_2	YEL058W	PCM1	-0.559548	0.894853	no	no
YEL059W::chr5_2	YEL059W	HHY1	0.0163697	0.534213	no	no
YEL060C::chr5_2	YEL060C	PRB1	0.665872	0.109326	no	no
YEL061C::chr5_2	YEL061C	CIN8	-0.831627	0.964387	no	no
YEL062W::chr5_2	YEL062W	NPR2	0.409381	0.238718	no	no
YEL063C::chr5_2	YEL063C	CAN1	0.505408	0.182734	no	no
YEL064C::chr5_2	YEL064C	AVT2	0.247614	0.350983	no	no
YEL065W::chr5_2	YEL065W	SIT1	0.753335	0.0796643	no	no
YEL066W::chr5_2	YEL066W	HPA3	-0.146501	0.661245	no	no
YEL067C::chr5_2	YEL067C	YEL067C	0.991495	0.029387	no	no
YEL068C::chr5_2	YEL068C	YEL068C	-0.236017	0.724826	no	no
YEL071W::chr5_2	YEL071W	DLD3	-0.467471	0.856832	no	no
YEL072W::chr5_2	YEL072W	RMD6	-0.267726	0.745849	no	no
YER001W::chr5_2	YER001W	MNN1	-0.744164	0.948112	no	no
YER003C::chr5_2	YER003C	PMI40	-0.182534	0.687534	no	no
YER004W::chr5_2	YER004W	FMP52	-0.612987	0.913248	no	no
YER005W::chr5_2	YER005W	YND1	-0.529064	0.883172	no	no
YER006W::chr5_2	YER006W	NUG1	0.592871	0.13958	no	no
YER007C-A::chr5_2	YER007C-A	TMA20	-0.0477489	0.58542	no	no
YER007W::chr5_2	YER007W	PAC2	-0.285345	0.757156	no	no
YER009W::chr5_2	YER009W	NTF2	-0.214956	0.710404	no	no
YER010C::chr5_2	YER010C	YER010C	-0.505399	0.87349	no	no
YER011W::chr5_2	YER011W	TIR1	-0.535234	0.885607	no	no
YER012W::chr5_2	YER012W	PRE1	0.852226	0.0539504	yes	yes
YER013W::chr5_2	YER013W	PRP22	0.611218	0.131488	yes	yes
YER014W::chr5_2	YER014W	HEM14	0.620885	0.127358	no	no
YER016W::chr5_3	YER016W	BIM1	-0.240092	0.727574	no	no
YER017C::chr5_3	YER017C	AFG3	0.457879	0.209345	no	no
YER018C::chr5_3	YER018C	SPC25	0.0428419	0.512855	no	no
YER019C-A::chr5_3	YER019C-A	SBH2	0.622939	0.126492	no	no
YER019W::chr5_3	YER019W	ISC1	-0.671163	0.930417	no	no
YER020W::chr5_3	YER020W	GPA2	-0.246665	0.73198	no	no
YER021W::chr5_3	YER021W	RPN3	0.20154	0.38617	no	no
YER022W::chr5_3	YER022W	SRB4	-0.297291	0.764664	no	no
YER023W::chr5_3	YER023W	PRO3	-0.305558	0.769785	no	no
YER024W::chr5_3	YER024W	YAT2	0.846445	0.0552459	no	no
YER025W::chr5_3	YER025W	GCD11	0.241214	0.355803	yes	yes
YER027C::chr00_11	YER027C	GAL83	-0.303696	0.768636	no	no
YER027C::chr5_3	YER027C	GAL83	0.168373	0.412112	no	no
YER028C::chr5_3	YER028C	MIG3	-0.0660925	0.599845	no	no
YER030W::chr5_3	YER030W	CHZ1	0.796404	0.0675098	no	no
YER031C::chr00_10	YER031C	YPT31	0.0966618	0.469384	no	no
YER032W::chr5_3	YER032W	FIR1	0.0640361	0.495726	no	no
YER033C::chr5_3	YER033C	ZRG8	0.431407	0.225106	no	no
YER034W::chr5_3	YER034W	YER034W	-0.0583981	0.593809	no	no
YER035W::chr5_3	YER035W	EDC2	-0.114027	0.636856	no	no
YER036C::chr5_3	YER036C	ARB1	-0.341302	0.79119	no	no
YER037W::chr00_11	YER037W	PHM8	0.753335	0.0796643	no	no
YER037W::chr5_3	YER037W	PHM8	0.44489	0.216996	no	no
YER038C::chr5_3	YER038C	KRE29	0.0678459	0.492647	no	no
YER038W-A::chr5_3	YER038W-A	YER038W-A	-0.220669	0.714351	no	no
YER039C-A::chr00_2	YER039C-A	YER039C-A	-0.362142	0.803111	no	no
YER040W::chr5_3	YER040W	GLN3	-0.648763	0.924145	no	no
YER041W::chr5_3	YER041W	YEN1	0.111789	0.457209	no	no
YER042W::chr5_3	YER042W	MXR1	0.796404	0.0675098	no	no
YER043C::chr5_3	YER043C	SAH1	0.597216	0.137633	no	no
YER044C::chr5_3	YER044C	ERG28	0.835797	0.0576959	no	no
YER044C-A::chr5_3	YER044C-A	MEI4	-0.0394321	0.57884	no	no
YER045C::chr5_3	YER045C	ACA1	0.0208156	0.530631	no	no
YER046W::chr00_10	YER046W	SPO73	0.290363	0.319433	no	no
YER046W-A::chr5_3	YER046W-A	YER046W-A	0.168373	0.412112	no	no
YER047C::chr5_3	YER047C	SAP1	-0.388558	0.817613	no	no
YER048C::chr5_3	YER048C	CAJ1	0.128844	0.44353	no	no
YER048W-A::chr00_2	YER048W-A	ISD11	-0.753625	0.950117	no	no
YER049W::chr5_3	YER049W	TPA1	-0.102275	0.627885	no	no
YER050C::chr5_3	YER050C	RSM18	-0.799918	0.959051	no	no
YER051W::chr5_3	YER051W	JHD1	0.490301	0.190954	no	no
YER052C::chr5_3	YER052C	HOM3	-0.104646	0.6297	no	no
YER054C::chr5_3	YER054C	GIP2	-0.744164	0.948112	no	no
YER055C::chr5_3	YER055C	HIS1	0.370007	0.264133	no	no
YER056C::chr5_3	YER056C	FCY2	-0.0484386	0.585964	no	no
YER056C-A::chr5_3	YER056C-A	RPL34A	-0.107262	0.6317	no	no
YER057C::chr5_3	YER057C	HMF1	-0.577444	0.901304	no	no
YER058W::chr5_3	YER058W	PET117	-0.831627	0.964387	no	no
YER059W::chr5_3	YER059W	PCL6	-0.665617	0.928903	no	no
YER060W::chr5_3	YER060W	FCY21	-0.377061	0.811385	no	no
YER061C::chr5_3	YER061C	CEM1	1.25083	0.00786027	no	no
YER062C::chr5_3	YER062C	HOR2	-0.365059	0.804746	no	no
YER063W::chr00_10	YER063W	THO1	-0.568593	0.898151	no	no
YER064C::chr00_8	YER064C	VHR2	-0.831627	0.964387	no	no
YER065C::chr5_3	YER065C	ICL1	0.0308693	0.522523	no	no
YER066W::chr00_10	YER066W	RRT13	0.665872	0.109326	no	no
YER067C-A::chr5_3	YER067C-A	YER067C-A	-0.456118	0.851571	no	no
YER067W::chr5_3	YER067W	RGI1	0.457879	0.209345	no	no
YER068C-A::chr5_3	YER068C-A	YER068C-A	0.805803	0.0650586	no	no
YER068W::chr5_3	YER068W	MOT2	0.331872	0.289999	no	no
YER069W::chr5_3	YER069W	ARG5,6	1.16837	0.0122798	no	no
YER070W::chr5_3	YER070W	RNR1	0.168373	0.412112	no	no
YER071C::chr5_3	YER071C	TDA2	-0.00155221	0.548621	no	no
YER073W::chr5_3	YER073W	ALD5	-0.101716	0.627457	no	no
YER074W::chr5_3	YER074W	RPS24A	2.00977	3.85813e-05	yes	yes
YER075C::chr5_3	YER075C	PTP3	-0.238803	0.726706	no	no
YER077C::chr00_8	YER077C	YER077C	-0.397224	0.822222	no	no
YER078C::chr00_8	YER078C	ICP55	-0.238252	0.726335	no	no
YER079W::chr5_3	YER079W	YER079W	0.868813	0.0503669	no	no
YER080W::chr5_3	YER080W	AIM9	0.0528956	0.504731	no	no
YER081W::chr5_3	YER081W	SER3	0.431407	0.225106	no	no
YER082C::chr5_3	YER082C	UTP7	-0.3462	0.79403	no	no
YER083C::chr5_3	YER083C	GET2	0.519845	0.175088	no	no
YER084W::chr5_3	YER084W	YER084W	0.168373	0.412112	no	no
YER085C::chr5_3	YER085C	YER085C	0.168373	0.412112	no	no
YER086W::chr5_3	YER086W	ILV1	0.665872	0.109326	no	no
YER087C-A::chr5_3	YER087C-A	YER087C-A	-0.437348	0.842591	no	no
YER087W::chr5_3	YER087W	AIM10	-0.297291	0.764664	no	no
YER088C::chr00_8	YER088C	DOT6	0.768765	0.0751324	no	no
YER089C::chr00_17a	YER089C	PTC2	1.22084	0.00927218	no	no
YER090W::chr00_8	YER090W	TRP2	0.113231	0.45605	no	no
YER091C-A::chr00_2	YER091C-A	YER091C-A	-0.504053	0.872923	no	no
YER092W::chr00_8	YER092W	IES5	0.361018	0.270123	no	no
YER093C-A::chr00_8	YER093C-A	AIM11	1.44139	0.0025438	no	no
YER094C::chr00_8	YER094C	PUP3	0.516296	0.176948	no	no
YER095W::chr00_8	YER095W	RAD51	-0.183929	0.688534	no	no
YER096W::chr00_8	YER096W	SHC1	1.39077	0.00347889	no	no
YER097W::chr00_8	YER097W	YER097W	0.361018	0.270123	no	no
YER098W::chr00_8	YER098W	UBP9	-0.203596	0.70248	no	no
YER101C::chr00_5	YER101C	AST2	-0.185264	0.68949	no	no
YER103W::chr00_5	YER103W	SSA4	0.846445	0.0552459	no	no
YER106W::chr00_5	YER106W	MAM1	-0.469057	0.857558	no	no
YER107C::chr00_5	YER107C	GLE2	0.0752634	0.486653	no	no
YER108C::chr00_5	YER109C	FLO8	0.0664932	0.49374	no	no
YER109C::chr00_5	YER109C	FLO8	-0.11304	0.636106	no	no
YER110C::chr00_5	YER110C	KAP123	-0.831627	0.964387	no	no
YER111C::chr00_5	YER111C	SWI4	-0.539446	0.887249	no	no
YER112W::chr00_5	YER112W	LSM4	0.301639	0.311313	no	no
YER113C::chr00_5	YER113C	TMN3	-0.0795547	0.610346	no	no
YER114C::chr00_5	YER114C	BOI2	1.32171	0.00524952	yes	yes
YER115C::chr00_5	YER115C	SPR6	0.338298	0.285558	no	no
YER116C::chr00_5	YER116C	SLX8	1.24638	0.00805743	no	no
YER117W::chr00_5	YER117W	RPL23B	0.436686	0.221911	no	no
YER118C::chr00_5	YER118C	SHO1	0.457879	0.209345	no	no
YER119C::chr00_5	YER119C	AVT6	0.0396772	0.515412	no	no
YER119C-A::chr00_5	YER119C-A	YER119C-A	-0.738518	0.946885	no	no
YER120W::chr00_5	YER120W	SCS2	-0.0764461	0.607928	no	no
YER121W::chr00_5	YER121W	YER121W	-0.453116	0.850158	no	no
YER122C::chr00_5	YER122C	GLO3	-0.339758	0.790291	no	no
YER123W::chr00_5	YER123W	YCK3	0.145289	0.430405	no	no
YER124C::chr00_5	YER124C	DSE1	-0.41659	0.832252	no	no
YER125W::chr00_5	YER125W	RSP5	-0.142742	0.658454	no	no
YER126C::chr00_5	YER126C	NSA2	-0.831627	0.964387	no	no
YER127W::chr00_5	YER127W	LCP5	-0.146501	0.661245	no	no
YER128W::chr00_5	YER128W	VFA1	0.431407	0.225106	no	no
YER129W::chr00_5	YER129W	SAK1	-0.617502	0.914685	no	no
YER130C::chr00_5	YER130C	YER130C	0.10735	0.460778	no	no
YER132C::chr00_5	YER132C	PMD1	0.694442	0.0988719	no	no
YER133W::chr00_5	YER133W	GLC7	-0.3462	0.79403	no	no
YER134C::chr00_5	YER134C	YER134C	0.562652	0.153632	no	no
YER135C::chr00_5	YER135C	YER135C	0.562652	0.153632	no	no
YER136W::chr00_5	YER136W	GDI1	1.23925	0.00838151	yes	yes
YER137C::chr00_5	YER137C	YER137C	-0.147129	0.661711	no	no
YER140W::chr00_5	YER140W	YER140W	0.168373	0.412112	no	no
YER141W::chr00_5	YER141W	COX15	-0.469057	0.857558	no	no
YER142C::chr00_5	YER142C	MAG1	0.38907	0.251659	no	no
YER143W::chr00_5	YER143W	DDI1	0.959141	0.0340514	yes	yes
YER144C::chr00_2	YER144C	UBP5	0.338298	0.285558	no	no
YER145C::chr00_5	YER145C	FTR1	2.28107	3.3541e-06	yes	yes
YER146W::chr00_5	YER146W	LSM5	0.724766	0.0885965	no	no
YER149C::chr00_5	YER149C	PEA2	-0.463895	0.855189	no	no
YER150W::chr00_5	YER150W	SPI1	0.608945	0.132473	no	no
YER151C::chr00_5	YER151C	UBP3	0.868813	0.0503669	no	no
YER154W::chr00_5	YER154W	OXA1	0.457879	0.209345	no	no
YER155C::chr00_5	YER155C	BEM2	-0.338587	0.789607	no	no
YER156C::chr00_5	YER156C	YER156C	0.315214	0.301658	no	no
YER158C::chr00_5	YER158C	YER158C	-0.334128	0.786991	no	no
YER159C::chr00_5	YER159C	BUR6	-0.153555	0.66646	no	no
YER161C::chr00_5	YER161C	SPT2	0.242373	0.354927	no	no
YER162C::chr00_5	YER162C	RAD4	1.33085	0.00497633	no	no
YER163C::chr00_5	YER163C	YER163C	-0.105802	0.630585	no	no
YER164W::chr00_5	YER164W	CHD1	-0.504053	0.872923	no	no
YER165W::chr00_5	YER165W	PAB1	0.0752634	0.486653	no	no
YER166W::chr00_5	YER166W	DNF1	-0.3462	0.79403	no	no
YER167W::chr00_5	YER167W	BCK2	-0.0660925	0.599845	no	no
YER169W::chr00_5	YER169W	RPH1	0.168373	0.412112	no	no
YER170W::chr00_5	YER170W	ADK2	-0.537896	0.886647	no	no
YER171W::chr00_5	YER171W	RAD3	-0.532067	0.884362	no	no
YER172C::chr00_5	YER172C	BRR2	-0.175582	0.68253	no	no
YER173W::chr00_5	YER173W	RAD24	-0.301112	0.767039	no	no
YER174C::chr00_5	YER174C	GRX4	-0.0540196	0.590365	no	no
YER176W::chr00_5	YER176W	ECM32	0.959141	0.0340514	yes	yes
YER177W::chr00_5	YER177W	BMH1	1.5441	0.0013082	yes	yes
YER178W::chr00_5	YER178W	PDA1	0.390765	0.250565	no	no
YER179W::chr00_5	YER179W	DMC1	0.0943722	0.47123	no	no
YER180C::chr00_5	YER180C	ISC10	-0.329127	0.784034	no	no
YER181C::chr00_5	YER181C	YER181C	-0.153555	0.66646	no	no
YER182W::chr00_5	YER182W	FMP10	0.431407	0.225106	no	no
YER184C::chr00_5	YER184C	YER184C	1.10424	0.0170739	no	no
YER185W::chr00_5	YER185W	PUG1	-1.09841	0.990476	no	no
YER186C::chr00_5	YER186C	YER186C	0.472195	0.201099	yes	yes
YER187W::chr00_5	YER187W	YER187W	0.478713	0.19741	no	no
YER188W::chr00_2	YER188W	YER188W	0.24038	0.356432	no	no
YFL002C::chr00_17a	YFL002C	SPB4	0.275288	0.330425	no	no
YFL003C::chr00_17a	YFL003C	MSH4	0.143711	0.431661	no	no
YFL004W::chr00_17a	YFL004W	VTC2	0.237635	0.358507	no	no
YFL005W::chr00_17a	YFL005W	SEC4	-0.509699	0.875289	no	no
YFL006W::chr6_1	YFL007W	BLM10	0.959141	0.0340514	yes	yes
YFL007W::chr00_17a	YFL007W	BLM10	0.608945	0.132473	no	no
YFL008W::chr6_1	YFL008W	SMC1	1.40938	0.00310411	no	no
YFL009W::chr6_1	YFL009W	CDC4	-0.340641	0.790806	no	no
YFL010C::chr00_17a	YFL010C	WWM1	0.905338	0.0431439	no	no
YFL011W::chr6_1	YFL011W	HXT10	-0.41659	0.832252	no	no
YFL013C::chr00_17a	YFL013C	IES1	0.831338	0.0587472	no	no
YFL013W-A::chr00_15	YFL013W-A	YFL013W-A	-0.483704	0.864135	no	no
YFL014W::chr00_15	YFL014W	HSP12	0.0281951	0.524681	no	no
YFL015C::chr6_1	YFL015C	YFL015C	0.670873	0.107441	no	no
YFL016C::chr00_17a	YFL016C	MDJ1	0.542768	0.163372	no	no
YFL018C::chr6_1	YFL018C	LPD1	0.601332	0.135807	no	no
YFL019C::chr00_15	YFL019C	YFL019C	0.448481	0.214865	no	no
YFL020C::chr6_1	YFL020C	PAU5	-0.231916	0.722045	no	no
YFL021W::chr6_1	YFL021W	GAT1	-0.153555	0.66646	no	no
YFL022C::chr6_1	YFL022C	FRS2	-0.0286641	0.570289	no	no
YFL024C::chr6_1	YFL024C	EPL1	0.419912	0.232155	no	no
YFL026W::chr00_16b	YFL026W	STE2	1.67535	0.000527442	yes	yes
YFL026W::chr6_1	YFL026W	STE2	-0.262262	0.742287	no	no
YFL027C::chr6_1	YFL027C	GYP8	0.334383	0.28826	no	no
YFL028C::chr6_1	YFL028C	CAF16	0.168373	0.412112	no	no
YFL029C::chr00_18	YFL029C	CAK1	-0.352459	0.797624	no	no
YFL030W::chr6_1	YFL030W	AGX1	0.348945	0.278273	no	no
YFL031W::chr6_1	YFL031W	HAC1	-0.775044	0.954427	no	no
YFL032W::chr6_1	YFL032W	YFL032W	-0.206355	0.704414	no	no
YFL033C::chr00_17a/chr00_18	YFL033C	RIM15	0.0308693	0.522523	no	no
YFL034C-A::chr00_2	YFL034C-A	RPL22B	-0.334128	0.786991	no	no
YFL034W::chr6_1	YFL034W	YFL034W	0.20154	0.38617	no	no
YFL035C::chr6_1	YFL034C-B	MOB2	-0.542121	0.888283	no	no
YFL035C-A::chr6_1	YFL034C-B	MOB2	1.10126	0.0173314	no	no
YFL035C-B::chr6_1	YFL034C-A	RPL22B	-1.12708	0.991862	no	no
YFL037W::chr6_1	YFL037W	TUB2	-0.295574	0.763593	no	no
YFL038C::chr6_1	YFL038C	YPT1	0.387013	0.252989	no	no
YFL039C::chr00_15	YFL039C	ACT1	0.611218	0.131488	yes	yes
YFL040W::chr6_1	YFL040W	YFL040W	-0.599454	0.908835	no	no
YFL041W::chr6_1	YFL041W	FET5	-0.00850497	0.554194	no	no
YFL042C::chr00_15	YFL042C	YFL042C	-0.544345	0.889138	no	no
YFL043C::chr6_1	YFL042C	YFL042C	0.0956164	0.470227	no	no
YFL044C::chr6_1	YFL044C	OTU1	-0.045752	0.583842	no	no
YFL045C::chr6_1	YFL045C	SEC53	0.670873	0.107441	no	no
YFL046W::chr6_1	YFL046W	FMP32	0.316471	0.300771	no	no
YFL047W::chr6_1	YFL047W	RGD2	0.0480786	0.508624	no	no
YFL049W::chr6_1	YFL049W	SWP82	-0.3462	0.79403	no	no
YFL050C::chr6_1	YFL050C	ALR2	-0.581649	0.902777	no	no
YFL051C::chr6_1	YFL051C	YFL051C	-0.365964	0.805251	no	no
YFL052W::chr6_1	YFL052W	YFL052W	0.126553	0.445365	no	no
YFL053W::chr6_1	YFL053W	DAK2	0.28385	0.324163	no	no
YFL054C::chr6_1	YFL054C	YFL054C	0.168373	0.412112	no	no
YFL055W::chr6_1	YFL055W	AGP3	-0.3462	0.79403	no	no
YFL056C::chr6_1	YFL056C	AAD6	-0.045752	0.583842	no	no
YFL063W::chr00_18	YFL063W	YFL063W	0.793977	0.0681542	no	no
YFR001W::chr6_1	YFR001W	LOC1	0.168373	0.412112	no	no
YFR002W::chr00_18	YFR002W	NIC96	-0.448299	0.847872	no	no
YFR003C::chr6_1	YFR003C	YPI1	0.0882024	0.476206	no	no
YFR004W::chr6_1	YFR004W	RPN11	0.361018	0.270123	no	no
YFR005C::chr6_1	YFR005C	SAD1	-0.428746	0.838359	no	no
YFR006W::chr6_1	YFR006W	YFR006W	-0.117931	0.63982	no	no
YFR007W::chr6_1	YFR007W	YFH7	0.0752634	0.486653	no	no
YFR008W::chr6_1	YFR008W	FAR7	0.860493	0.0521399	no	no
YFR009W::chr6_1	YFR009W	GCN20	-0.448299	0.847872	no	no
YFR011C::chr00_16b	YFR011C	AIM13	0.293904	0.316874	no	no
YFR011C::chr6_1	YFR011C	AIM13	0.218999	0.372708	no	no
YFR012W::chr6_1	YFR012W	DCV1	-0.301112	0.767039	no	no
YFR013W::chr00_16b	YFR013W	IOC3	1.6423	0.000667118	no	yes
YFR014C::chr6_1	YFR014C	CMK1	0.409381	0.238718	no	no
YFR015C::chr6_1	YFR015C	GSY1	0.168373	0.412112	no	no
YFR017C::chr6_1	YFR017C	IGD1	0.250835	0.348566	no	no
YFR018C::chr6_1	YFR018C	YFR018C	0.0979835	0.468319	no	no
YFR019W::chr00_15	YFR019W	FAB1	-0.109612	0.633494	no	no
YFR020W::chr6_1	YFR020W	YFR020W	-0.246665	0.73198	no	no
YFR021W::chr6_1	YFR021W	ATG18	0.360821	0.270255	no	no
YFR022W::chr6_1	YFR022W	ROG3	0.0584	0.500282	no	no
YFR023W::chr6_1	YFR023W	PES4	0.457879	0.209345	no	no
YFR024C::chr00_15	YFR024C-A	LSB3	-0.0380781	0.577767	no	no
YFR024C-A::chr6_1	YFR024C-A	LSB3	0.595794	0.138268	no	no
YFR025C::chr00_15	YFR025C	HIS2	-0.246665	0.73198	no	no
YFR026C::chr6_1	YFR026C	ULI1	0.412298	0.23689	no	no
YFR027W::chr6_1	YFR027W	ECO1	0.42363	0.229862	no	no
YFR028C::chr00_15	YFR028C	CDC14	0.736749	0.0847633	yes	yes
YFR029W::chr00_15	YFR029W	PTR3	0.028648	0.524315	no	no
YFR030W::chr00_15	YFR030W	MET10	0.805803	0.0650586	no	no
YFR031C::chr00_15	YFR031C	SMC2	0.936199	0.0377149	no	no
YFR031C-A::chr6_1	YFR031C-A	RPL2A	1.09437	0.0179383	no	no
YFR032C::chr00_2	YFR032C	RRT5	0.312763	0.303392	no	no
YFR032C-A::chr00_2	YFR032C-A	RPL29	-0.0540196	0.590365	no	no
YFR033C::chr00_2	YFR033C	QCR6	0.570471	0.149909	no	no
YFR034C::chr00_2	YFR034C	PHO4	0.315214	0.301658	no	no
YFR035C::chr00_2	YFR035C	YFR035C	-0.262967	0.742748	no	no
YFR036W::chr00_2	YFR036W	CDC26	-1.29106	0.99688	no	no
YFR037C::chr00_2	YFR037C	RSC8	0.377826	0.258979	no	no
YFR039C::chr00_14	YFR039C	YFR039C	-0.0180403	0.56182	no	no
YFR040W::chr00_2	YFR040W	SAP155	-0.873447	0.970538	no	no
YFR041C::chr00_2	YFR041C	ERJ5	0.708941	0.0938549	no	no
YFR042W::chr00_2	YFR042W	KEG1	-0.664517	0.9286	no	no
YFR044C::chr00_2	YFR044C	DUG1	0.56798	0.151088	no	no
YFR045W::chr00_2	YFR045W	YFR045W	0.168373	0.412112	no	no
YFR046C::chr00_2	YFR046C	CNN1	-0.394563	0.820815	no	no
YFR047C::chr00_2	YFR047C	BNA6	0.444007	0.217522	no	no
YFR048W::chr00_2	YFR048W	RMD8	-0.0557753	0.591747	no	no
YFR049W::chr00_2	YFR049W	YMR31	0.57287	0.148779	no	no
YFR050C::chr00_2	YFR050C	PRE4	-0.0660925	0.599845	no	no
YFR051C::chr00_2	YFR051C	RET2	0.104242	0.463278	no	no
YFR052W::chr00_2	YFR052W	RPN12	-0.0121995	0.557151	no	no
YFR053C::chr00_2	YFR053C	HXK1	0.28385	0.324163	no	no
YFR054C::chr00_2	YFR054C	YFR054C	-0.615899	0.914177	no	no
YFR055W::chr00_2	YFR055W	IRC7	0.793361	0.0683185	no	no
YFR056C::chr00_2	YFR056C	YFR056C	0.473227	0.200512	no	no
YFR057W::chr00_2	YFR057W	YFR057W	0.88325	0.0474043	no	no
YGL001C::chr7_1	YGL001C	ERG26	-0.380966	0.813515	no	no
YGL002W::chr7_1	YGL002W	ERP6	-0.0603043	0.595307	no	no
YGL003C::chr7_1	YGL003C	CDH1	-0.164085	0.674182	no	no
YGL004C::chr7_1	YGL004C	RPN14	-0.379115	0.812507	no	no
YGL005C::chr7_1	YGL005C	COG7	-0.528235	0.882842	no	no
YGL006W::chr7_1	YGL006W	PMC1	0.0663034	0.493893	no	no
YGL007W::chr7_1	YGL007W	BRP1	0.293904	0.316874	no	no
YGL008C::chr7_1	YGL008C	PMA1	-0.689608	0.935275	no	no
YGL009C::chr7_1	YGL009C	LEU1	0.00487406	0.543461	no	no
YGL010W::chr7_1	YGL010W	YGL010W	-0.36768	0.806208	no	no
YGL011C::chr7_1	YGL011C	SCL1	0.536105	0.166724	no	no
YGL013C::chr7_1	YGL013C	PDR1	-0.507192	0.874242	no	no
YGL014W::chr7_1	YGL014W	PUF4	-0.295574	0.763593	no	no
YGL015C::chr7_1	YGL015C	YGL015C	-0.286027	0.757588	no	no
YGL016W::chr7_1	YGL016W	KAP122	-0.618224	0.914913	no	no
YGL017W::chr7_1	YGL017W	ATE1	0.168373	0.412112	no	no
YGL018C::chr7_1	YGL018C	JAC1	0.0163697	0.534213	no	no
YGL019W::chr7_1	YGL019W	CKB1	0.168373	0.412112	no	no
YGL020C::chr7_1	YGL020C	GET1	-0.375948	0.810775	no	no
YGL021W::chr7_1	YGL021W	ALK1	-0.790985	0.957436	no	no
YGL022W::chr7_1	YGL022W	STT3	-0.0418449	0.580752	no	no
YGL023C::chr7_1	YGL023C	PIB2	0.4163	0.234394	no	no
YGL024W::chr7_1	YGL024W	YGL024W	-0.365964	0.805251	no	no
YGL025C::chr7_1	YGL025C	PGD1	-0.459658	0.853225	no	no
YGL026C::chr7_1	YGL026C	TRP5	0.439675	0.220113	no	no
YGL027C::chr7_1	YGL027C	CWH41	0.0569444	0.501458	no	no
YGL028C::chr7_1	YGL028C	SCW11	-0.279086	0.753171	no	no
YGL029W::chr7_1	YGL029W	CGR1	-0.362142	0.803111	no	no
YGL031C::chr7_1	YGL031C	RPL24A	0.272937	0.332153	no	no
YGL032C::chr7_1	YGL032C	AGA2	-0.246665	0.73198	no	no
YGL033W::chr7_1	YGL033W	HOP2	0.00483111	0.543496	no	no
YGL034C::chr7_1	YGL034C	YGL034C	-0.525524	0.881758	no	no
YGL035C::chr7_1	YGL035C	MIG1	-0.132925	0.651124	no	no
YGL036W::chr7_1	YGL036W	YGL036W	0.152071	0.425013	no	no
YGL037C::chr7_1	YGL037C	PNC1	0.0428419	0.512855	no	no
YGL038C::chr7_1	YGL038C	OCH1	-0.326392	0.782407	no	no
YGL039W::chr7_1	YGL039W	YGL039W	-0.13975	0.656226	no	no
YGL040C::chr7_1	YGL040C	HEM2	0.0882024	0.476206	no	no
YGL041C::chr7_1	YGL041C	YGL041C	-0.148579	0.662785	no	no
YGL042C::chr7_1	YGL042C	YGL042C	0.136664	0.43728	no	no
YGL043W::chr7_1	YGL043W	DST1	0.0573415	0.501137	no	no
YGL044C::chr7_1	YGL044C	RNA15	-0.267463	0.745678	no	no
YGL045W::chr7_1	YGL045W	RIM8	-0.334128	0.786991	no	no
YGL046W::chr7_1	YGL045W	RIM8	0.0943722	0.47123	no	no
YGL047W::chr7_1	YGL047W	ALG13	0.219031	0.372683	no	no
YGL048C::chr7_1	YGL048C	RPT6	-0.0853838	0.614869	no	no
YGL049C::chr7_1	YGL049C	TIF4632	-1.4446	0.99884	no	no
YGL050W::chr7_1	YGL050W	TYW3	0.168373	0.412112	no	no
YGL051W::chr7_1	YGL051W	MST27	-0.372196	0.808711	no	no
YGL053W::chr7_1	YGL053W	PRM8	0.796404	0.0675098	no	no
YGL054C::chr7_1	YGL054C	ERV14	0.222684	0.369885	no	no
YGL055W::chr7_1	YGL055W	OLE1	-0.590619	0.905865	no	no
YGL056C::chr7_1	YGL056C	SDS23	-0.0946616	0.622035	no	no
YGL057C::chr7_1	YGL057C	GEP7	0.253262	0.346749	no	no
YGL058W::chr7_1	YGL058W	RAD6	0.325914	0.294145	no	no
YGL059W::chr7_1	YGL059W	PKP2	0.374824	0.260952	no	no
YGL060W::chr7_1	YGL060W	YBP2	0.0885482	0.475927	no	no
YGL061C::chr7_1	YGL061C	DUO1	-0.528235	0.882842	no	no
YGL062W::chr7_1	YGL062W	PYC1	-0.317054	0.7768	no	no
YGL063W::chr7_1	YGL063W	PUS2	0.0889383	0.475612	no	no
YGL064C::chr7_1	YGL064C	MRH4	-0.487673	0.865881	no	no
YGL065C::chr7_1	YGL065C	ALG2	0.0843085	0.479349	no	no
YGL066W::chr7_1	YGL066W	SGF73	0.078175	0.484301	no	no
YGL067W::chr7_1	YGL067W	NPY1	0.338298	0.285558	no	no
YGL068W::chr7_1	YGL068W	MNP1	-0.456612	0.851802	no	no
YGL069C::chr7_1	YGL069C	YGL069C	0.255935	0.344752	no	no
YGL070C::chr7_1	YGL070C	RPB9	-0.799918	0.959051	no	no
YGL071W::chr7_1	YGL071W	AFT1	0.168373	0.412112	no	no
YGL072C::chr7_1	YGL072C	YGL072C	0.490301	0.190954	no	no
YGL073W::chr7_1	YGL073W	HSF1	-0.31848	0.777662	no	no
YGL074C::chr7_1	YGL074C	YGL074C	0.0767423	0.485458	no	no
YGL075C::chr7_1	YGL075C	MPS2	1.00236	0.0279446	no	no
YGL076C::chr7_1	YGL076C	RPL7A	0.457879	0.209345	no	no
YGL077C::chr7_1	YGL077C	HNM1	0.126018	0.445792	no	no
YGL078C::chr7_1	YGL078C	DBP3	-0.030936	0.572096	no	no
YGL079W::chr7_1	YGL079W	KXD1	0.168373	0.412112	no	no
YGL080W::chr7_1	YGL080W	FMP37	0.331872	0.289999	no	no
YGL081W::chr7_1	YGL081W	YGL081W	-0.267726	0.745849	no	no
YGL082W::chr7_1	YGL082W	YGL082W	-0.212231	0.708512	no	no
YGL083W::chr7_1	YGL083W	SCY1	-0.25386	0.73676	no	no
YGL084C::chr7_1	YGL084C	GUP1	-0.0160518	0.560231	no	no
YGL085W::chr7_1	YGL085W	LCL3	-0.293531	0.762315	no	no
YGL086W::chr7_1	YGL086W	MAD1	-0.176275	0.683031	no	no
YGL087C::chr7_1	YGL087C	MMS2	0.0953093	0.470474	no	no
YGL088W::chr7_1	YGL088W	YGL088W	0.298433	0.313612	no	no
YGL089C::chr7_1	YGL089C	MF(ALPHA)2	-0.448299	0.847872	no	no
YGL090W::chr7_1	YGL090W	LIF1	-0.220669	0.714351	no	no
YGL091C::chr7_1	YGL091C	NBP35	-0.220192	0.714022	no	no
YGL092W::chr7_1	YGL092W	NUP145	-0.679624	0.93268	no	no
YGL093W::chr7_1	YGL093W	SPC105	-0.474075	0.859835	no	no
YGL094C::chr7_1	YGL094C	PAN2	-0.0660925	0.599845	no	no
YGL095C::chr7_1	YGL095C	VPS45	0.106161	0.461734	no	no
YGL096W::chr7_1	YGL096W	TOS8	0.345251	0.28079	no	no
YGL097W::chr7_1/chr00_17a	YGL097W	SRM1	0.189746	0.395343	no	no
YGL098W::chr7_2	YGL098W	USE1	-0.0380781	0.577767	no	no
YGL101W::chr7_2	YGL101W	YGL101W	0.0428419	0.512855	no	no
YGL102C::chr7_2	YGL102C	YGL102C	-0.00850497	0.554194	no	no
YGL103W::chr7_2	YGL103W	RPL28	-0.0180403	0.56182	no	no
YGL105W::chr7_2	YGL105W	ARC1	-0.172992	0.680658	no	no
YGL107C::chr7_2	YGL107C	RMD9	0.0225219	0.529256	no	no
YGL109W::chr7_2	YGL109W	YGL109W	-0.173589	0.68109	no	no
YGL110C::chr7_2	YGL110C	CUE3	-0.0295666	0.571007	no	no
YGL111W::chr7_2	YGL111W	NSA1	0.548577	0.160486	no	no
YGL112C::chr7_2	YGL112C	TAF6	0.00487406	0.543461	no	no
YGL113W::chr7_2	YGL113W	SLD3	-0.210139	0.707056	no	no
YGL114W::chr7_2	YGL114W	YGL114W	0.212767	0.377496	no	no
YGL115W::chr7_2	YGL115W	SNF4	-0.609235	0.912041	no	no
YGL116W::chr7_2	YGL116W	CDC20	0.168373	0.412112	no	no
YGL117W::chr7_2	YGL117W	YGL117W	-0.379115	0.812507	no	no
YGL118C::chr7_2	YGL118C	YGL118C	0.452166	0.212691	no	no
YGL120C::chr7_2	YGL120C	PRP43	0.506511	0.182142	no	no
YGL121C::chr7_2	YGL121C	GPG1	-0.301112	0.767039	no	no
YGL122C::chr7_2	YGL122C	NAB2	-0.0843933	0.614102	no	no
YGL123W::chr7_2	YGL123W	RPS2	0.852226	0.0539504	yes	yes
YGL124C::chr7_2	YGL124C	MON1	0.698888	0.0973131	no	no
YGL125W::chr7_2	YGL125W	MET13	0.450757	0.21352	no	no
YGL126W::chr7_2	YGL126W	SCS3	0.0839806	0.479613	no	no
YGL127C::chr7_2	YGL127C	SOH1	0.431407	0.225106	no	no
YGL128C::chr7_2	YGL128C	CWC23	-0.931163	0.977556	no	no
YGL129C::chr7_2	YGL129C	RSM23	-0.150918	0.664514	no	no
YGL130W::chr7_2	YGL130W	CEG1	0.164307	0.415321	no	no
YGL131C::chr7_2	YGL131C	SNT2	0.341209	0.283557	no	no
YGL132W::chr7_2	YGL132W	YGL132W	-0.0598962	0.594986	no	no
YGL133W::chr7_2	YGL133W	ITC1	-0.0629528	0.597385	no	no
YGL135W::chr7_2	YGL135W	RPL1B	0.518315	0.175888	no	no
YGL136C::chr7_2	YGL136C	MRM2	0.73397	0.0856409	no	no
YGL137W::chr7_2	YGL137W	SEC27	-0.568593	0.898151	no	no
YGL138C::chr7_2	YGL138C	YGL138C	-0.334128	0.786991	no	no
YGL139W::chr7_2	YGL139W	FLC3	-0.0795547	0.610346	no	no
YGL140C::chr7_2	YGL140C	YGL140C	-0.32348	0.780668	no	no
YGL141W::chr7_2	YGL141W	HUL5	0.0721575	0.489163	no	no
YGL143C::chr7_2	YGL143C	MRF1	-0.189179	0.692285	no	no
YGL146C::chr7_2	YGL146C	RRT6	-0.336863	0.788598	no	no
YGL147C::chr7_2	YGL147C	RPL9A	-0.597162	0.908071	no	no
YGL149W::chr7_2	YGL149W	YGL149W	-0.131187	0.649821	no	no
YGL150C::chr7_2	YGL150C	INO80	0.402838	0.242846	no	no
YGL151W::chr7_2	YGL151W	NUT1	-0.0380781	0.577767	no	no
YGL152C::chr7_2	YGL152C	YGL152C	0.207901	0.381248	no	no
YGL153W::chr7_2	YGL153W	PEX14	0.0772249	0.485069	no	no
YGL154C::chr7_2	YGL154C	LYS5	0.110657	0.458118	no	no
YGL155W::chr7_2	YGL155W	CDC43	-0.499052	0.870801	no	no
YGL156W::chr7_2	YGL156W	AMS1	-0.146501	0.661245	no	no
YGL157W::chr7_2	YGL157W	ARI1	0.0943722	0.47123	no	no
YGL158W::chr7_2	YGL158W	RCK1	-0.331198	0.785262	no	no
YGL159W::chr7_2	YGL159W	YGL159W	-0.437348	0.842591	no	no
YGL161C::chr7_2	YGL161C	YIP5	-0.288485	0.759142	no	no
YGL162W::chr7_2	YGL162W	SUT1	-0.174019	0.681401	no	no
YGL163C::chr7_2	YGL163C	RAD54	-0.0726353	0.604958	no	no
YGL164C::chr7_2	YGL164C	YRB30	-0.509699	0.875289	no	no
YGL165C::chr7_2	YGL165C	YGL165C	-0.127759	0.647244	no	no
YGL166W::chr7_2	YGL166W	CUP2	-0.614036	0.913584	no	no
YGL167C::chr7_2	YGL167C	PMR1	-0.546225	0.889856	no	no
YGL168W::chr7_2	YGL168W	HUR1	0.0140446	0.536085	no	no
YGL169W::chr7_2	YGL169W	SUA5	0.345251	0.28079	no	no
YGL170C::chr7_2	YGL170C	SPO74	0.124651	0.446887	no	no
YGL171W::chr7_2	YGL171W	ROK1	-1.02427	0.985895	no	no
YGL172W::chr7_2	YGL172W	NUP49	-0.100814	0.626764	no	no
YGL173C::chr7_2	YGL173C	XRN1	0.937047	0.037574	no	no
YGL174W::chr7_2	YGL174W	BUD13	-0.141967	0.657878	no	no
YGL175C::chr7_2	YGL175C	SAE2	0.345251	0.28079	no	no
YGL176C::chr7_2	YGL176C	YGL176C	-0.221574	0.714973	no	no
YGL177W::chr7_2	YGL177W	YGL177W	-0.312754	0.77419	no	no
YGL179C::chr7_2	YGL179C	TOS3	0.309235	0.305894	no	no
YGL180W::chr7_2	YGL180W	ATG1	-0.389109	0.817909	no	no
YGL181W::chr7_2	YGL181W	GTS1	-0.29397	0.76259	no	no
YGL194C::chr7_3	YGL194C	HOS2	0.379877	0.257635	no	no
YGL195W::chr7_3	YGL195W	GCN1	-0.111735	0.635112	no	no
YGL197W::chr7_3	YGL197W	MDS3	0.868813	0.0503669	no	no
YGL199C::chr7_3/chr00_12	YGL199C	YGL199C	0.753335	0.0796643	no	no
YGL201C::chr7_3	YGL201C	MCM6	0.730252	0.086826	no	no
YGL202W::chr7_3	YGL202W	ARO8	0.50941	0.180594	no	no
YGL205W::chr7_3	YGL205W	POX1	1.32171	0.00524952	yes	yes
YGL206C::chr7_3	YGL206C	CHC1	1.25952	0.00748843	no	no
YGL207W::chr7_3	YGL207W	SPT16	0.324492	0.295138	no	no
YGL208W::chr7_3	YGL208W	SIP2	0.275288	0.330425	no	no
YGL209W::chr7_3	YGL209W	MIG2	-0.638982	0.921275	no	no
YGL210W::chr7_3	YGL210W	YPT32	0.113925	0.455493	no	no
YGL211W::chr7_3	YGL211W	NCS6	0.94598	0.0361154	no	no
YGL213C::chr7_3	YGL213C	SKI8	0.550243	0.159664	no	no
YGL214W::chr7_3/chr00_12	YGL214W	YGL214W	1.32171	0.00524952	yes	yes
YGL215W::chr7_3	YGL215W	CLG1	1.16837	0.0122798	no	no
YGL216W::chr7_3	YGL216W	KIP3	0.261482	0.340621	no	no
YGL217C::chr7_3/chr00_12	YGL217C	YGL217C	0.0428419	0.512855	no	no
YGL218W::chr7_3/chr00_12	YGL218W	YGL218W	0.894198	0.0452524	no	no
YGL219C::chr00_14	YGL219C	MDM34	0.572763	0.148829	no	no
YGL220W::chr7_3	YGL220W	FRA2	0.878866	0.0482888	no	no
YGL221C::chr7_3	YGL221C	NIF3	0.168373	0.412112	no	no
YGL222C::chr7_3	YGL222C	EDC1	1.50541	0.0016886	no	no
YGL223C::chr7_3	YGL223C	COG1	0.846445	0.0552459	no	no
YGL224C::chr7_3	YGL224C	SDT1	0.310392	0.305073	no	no
YGL226C-A::chr7_3	YGL226C-A	OST5	1.23925	0.00838151	yes	yes
YGL227W::chr7_3	YGL227W	VID30	-0.0598962	0.594986	no	no
YGL230C::chr7_3	YGL230C	YGL230C	-0.19841	0.69883	no	no
YGL231C::chr7_3	YGL231C	EMC4	-0.499052	0.870801	no	no
YGL233W::chr7_3	YGL233W	SEC15	1.05868	0.0213824	yes	yes
YGL234W::chr7_3	YGL234W	ADE5,7	0.642304	0.11853	no	no
YGL235W::chr7_3/chr00_12	YGL235W	YGL235W	0.642304	0.11853	no	no
YGL236C::chr7_3	YGL236C	MTO1	0.250835	0.348566	no	no
YGL237C::chr7_3	YGL237C	HAP2	0.382498	0.255924	no	no
YGL238W::chr7_3	YGL238W	CSE1	0.736749	0.0847633	yes	yes
YGL239C::chr7_3/chr00_12	YGL239C	YGL239C	0.0275103	0.525233	no	no
YGL240W::chr7_3	YGL240W	DOC1	0.320376	0.298023	no	no
YGL241W::chr7_3	YGL241W	KAP114	0.28385	0.324163	no	no
YGL242C::chr7_3	YGL242C	YGL242C	0.399698	0.244841	no	no
YGL246C::chr7_3	YGL246C	RAI1	1.23925	0.00838151	yes	yes
YGL247W::chr7_3	YGL247W	BRR6	-0.0660925	0.599845	no	no
YGL248W::chr7_3	YGL248W	PDE1	0.320376	0.298023	no	no
YGL249W::chr7_3	YGL249W	ZIP2	0.0752634	0.486653	no	no
YGL251C::chr7_3	YGL251C	HFM1	-0.475483	0.860469	no	no
YGL252C::chr7_3	YGL252C	RTG2	-0.0946616	0.622035	no	no
YGL253W::chr7_3	YGL253W	HXK2	0.702709	0.0959877	no	no
YGL254W::chr7_3	YGL254W	FZF1	0.196387	0.39017	no	no
YGL256W::chr7_3	YGL256W	ADH4	-0.317054	0.7768	no	no
YGL257C::chr7_3	YGL257C	MNT2	0.611218	0.131488	yes	yes
YGL259W::chr7_3	YGL259W	YPS5	0.296697	0.314861	no	no
YGL260W::chr7_3	YGL260W	YGL260W	0.168373	0.412112	no	no
YGL262W::chr7_3	YGL262W	YGL262W	0.168373	0.412112	no	no
YGL263W::chr7_3	YGL263W	COS12	0.611218	0.131488	yes	yes
YGR002C::chr7_3	YGR002C	SWC4	-0.21865	0.712959	no	no
YGR003W::chr7_3	YGR003W	CUL3	0.58341	0.143882	no	no
YGR004W::chr7_3	YGR004W	PEX31	-0.679624	0.93268	no	no
YGR005C::chr7_3	YGR005C	TFG2	1.08591	0.0187088	no	no
YGR006W::chr7_3	YGR006W	PRP18	-0.568593	0.898151	no	no
YGR007W::chr7_3	YGR007W	ECT1	0.500948	0.185137	no	no
YGR008C::chr7_3	YGR008C	STF2	-0.537896	0.886647	no	no
YGR009C::chr7_3	YGR009C	SEC9	0.168373	0.412112	no	no
YGR010W::chr7_3	YGR010W	NMA2	-0.116074	0.638411	no	no
YGR011W::chr7_3/chr00_12	YGR011W	YGR011W	-1.03326	0.986536	no	no
YGR012W::chr7_3	YGR012W	YGR012W	-0.321012	0.779187	no	no
YGR013W::chr7_3	YGR013W	SNU71	-0.121134	0.642245	no	no
YGR014W::chr7_3	YGR014W	MSB2	0.753335	0.0796643	no	no
YGR015C::chr7_3	YGR015C	YGR015C	-0.331198	0.785262	no	no
YGR016W::chr7_3	YGR016W	YGR016W	-0.045752	0.583842	no	no
YGR017W::chr7_3	YGR017W	YGR017W	-1.68992	0.999802	no	no
YGR018C::chr7_3/chr00_12	YGR018C	YGR018C	0.551701	0.158947	no	no
YGR019W::chr7_3	YGR019W	UGA1	0.4163	0.234394	no	no
YGR020C::chr7_3	YGR020C	VMA7	-0.176763	0.683383	no	no
YGR021W::chr7_3	YGR021W	YGR021W	-0.298753	0.765574	no	no
YGR022C::chr7_3/chr00_12	YGR022C	YGR022C	0.426171	0.228302	no	no
YGR023W::chr7_3	YGR023W	MTL1	0.592871	0.13958	no	no
YGR024C::chr00_14	YGR024C	THG1	-0.542121	0.888283	no	no
YGR025W::chr7_3/chr00_12	YGR025W	YGR025W	0.505408	0.182734	no	no
YGR026W::chr7_3	YGR026W	YGR026W	0.868813	0.0503669	no	no
YGR027C::chr7_4	YGR027C	RPS25A	0.0614576	0.49781	no	no
YGR028W::chr00_14	YGR028W	MSP1	0.115905	0.453902	no	no
YGR030C::chr7_4	YGR030C	POP6	-1.3722	0.99813	no	no
YGR031W::chr7_4	YGR031W	IMO32	0.280848	0.326353	no	no
YGR032W::chr00_14	YGR032W	GSC2	0.406533	0.240511	no	no
YGR033C::chr7_4	YGR033C	TIM21	-0.0160518	0.560231	no	no
YGR034W::chr7_4	YGR034W	RPL26B	0.168373	0.412112	no	no
YGR035C::chr7_4	YGR035C	YGR035C	-0.0332611	0.573944	no	no
YGR036C::chr7_4	YGR036C	CAX4	-0.391055	0.818949	no	no
YGR038W::chr00_14	YGR038W	ORM1	-0.679624	0.93268	no	no
YGR039W::chr7_4	YGR039W	YGR039W	-0.41659	0.832252	no	no
YGR040W::chr00_14	YGR040W	KSS1	-0.395528	0.821326	no	no
YGR042W::chr7_4	YGR042W	YGR042W	0.961922	0.033628	no	no
YGR043C::chr7_4	YGR043C	NQM1	-0.37477	0.810128	no	no
YGR044C::chr7_4	YGR044C	RME1	0.275288	0.330425	no	no
YGR045C::chr7_4	YGR045C	YGR045C	0.301639	0.311313	no	no
YGR046W::chr00_14	YGR046W	TAM41	0.0480786	0.508624	no	no
YGR047C::chr7_4	YGR047C	TFC4	0.0688371	0.491846	no	no
YGR048W::chr00_14	YGR048W	UFD1	0.490301	0.190954	no	no
YGR049W::chr7_4	YGR049W	SCM4	-0.389109	0.817909	no	no
YGR050C::chr00_14	YGR050C	YGR050C	0.168373	0.412112	no	no
YGR051C::chr7_4	YGR051C	YGR051C	-0.180431	0.686024	no	no
YGR052W::chr7_4	YGR052W	FMP48	-0.467471	0.856832	no	no
YGR053C::chr00_14	YGR053C	YGR053C	0.278346	0.328183	no	no
YGR055W::chr7_4	YGR055W	MUP1	-0.125358	0.645436	no	no
YGR056W::chr7_4	YGR056W	RSC1	0.203778	0.384436	no	no
YGR057C::chr7_4	YGR057C	LST7	-0.0686664	0.601859	no	no
YGR058W::chr7_4	YGR058W	PEF1	0.113925	0.455493	no	no
YGR059W::chr7_4	YGR059W	SPR3	0.466918	0.204115	no	no
YGR060W::chr7_4	YGR060W	ERG25	0.412298	0.23689	no	no
YGR061C::chr7_4	YGR061C	ADE6	-0.246665	0.73198	no	no
YGR063C::chr00_14	YGR063C	SPT4	0.343459	0.282015	no	no
YGR064W::chr7_4	YGR064W	YGR064W	-0.456118	0.851571	no	no
YGR065C::chr7_4	YGR065C	VHT1	0.08091	0.482092	no	no
YGR066C::chr7_4	YGR066C	YGR066C	-0.392342	0.819635	no	no
YGR067C::chr7_4	YGR067C	YGR067C	0.0163697	0.534213	no	no
YGR069W::chr7_4	YGR069W	YGR069W	0.469542	0.202612	no	no
YGR071C::chr7_4	YGR071C	ENV11	-0.799918	0.959051	no	no
YGR072W::chr7_4	YGR072W	UPF3	0.458179	0.20917	no	no
YGR073C::chr7_4	YGR073C	YGR073C	0.08091	0.482092	no	no
YGR074W::chr7_4	YGR074W	SMD1	-0.391055	0.818949	no	no
YGR075C::chr7_4	YGR075C	PRP38	-0.332321	0.785925	no	no
YGR076C::chr7_4	YGR076C	MRPL25	0.0263538	0.526166	no	no
YGR077C::chr7_4	YGR077C	PEX8	-0.609235	0.912041	no	no
YGR078C::chr7_4	YGR078C	PAC10	0.0968195	0.469257	no	no
YGR079W::chr7_4	YGR079W	YGR079W	-0.108467	0.632621	no	no
YGR080W::chr7_4	YGR080W	TWF1	-0.0806548	0.611201	no	no
YGR081C::chr7_4	YGR081C	SLX9	0.276443	0.329578	no	no
YGR082W::chr00_14	YGR082W	TOM20	-0.153555	0.66646	no	no
YGR083C::chr7_4	YGR083C	GCD2	0.210193	0.379479	no	no
YGR084C::chr7_4	YGR084C	MRP13	0.28385	0.324163	no	no
YGR086C::chr00_14	YGR086C	PIL1	-0.389623	0.818184	no	no
YGR087C::chr7_4	YGR087C	PDC6	-0.457812	0.852364	no	no
YGR088W::chr7_4	YGR088W	CTT1	0.249293	0.349722	no	no
YGR089W::chr00_14	YGR089W	NNF2	-0.107262	0.6317	no	no
YGR090W::chr7_4	YGR090W	UTP22	-0.275234	0.750701	no	no
YGR091W::chr7_4	YGR091W	PRP31	-0.240516	0.72786	no	no
YGR092W::chr00_14	YGR092W	DBF2	-0.317054	0.7768	no	no
YGR093W::chr00_14	YGR093W	YGR093W	0.361322	0.269919	yes	yes
YGR094W::chr7_4	YGR094W	VAS1	0.0791675	0.4835	no	no
YGR095C::chr7_4	YGR095C	RRP46	-0.459658	0.853225	no	no
YGR096W::chr7_4	YGR096W	TPC1	0.194062	0.391979	yes	yes
YGR097W::chr7_4	YGR097W	ASK10	-0.177402	0.683844	no	no
YGR098C::chr7_4	YGR098C	ESP1	-0.706096	0.939391	no	no
YGR099W::chr7_4	YGR099W	TEL2	0.293904	0.316874	no	no
YGR100W::chr7_4	YGR100W	MDR1	-0.0946616	0.622035	no	no
YGR101W::chr7_4	YGR101W	PCP1	0.0202742	0.531068	no	no
YGR102C::chr7_4	YGR102C	GTF1	0.26353	0.339101	no	no
YGR103W::chr7_4	YGR103W	NOP7	0.558319	0.155721	no	no
YGR104C::chr7_4	YGR104C	SRB5	-0.609235	0.912041	no	no
YGR105W::chr7_4	YGR105W	VMA21	-0.19117	0.693701	no	no
YGR106C::chr00_14	YGR106C	VOA1	-0.376586	0.811125	no	no
YGR107W::chr7_4	YGR107W	YGR107W	0.591584	0.14016	no	no
YGR108W::chr7_4	YGR108W	CLB1	0.270056	0.334274	no	no
YGR109C::chr7_4	YGR109C	CLB6	-0.0767397	0.608157	no	no
YGR111W::chr7_4	YGR111W	YGR111W	0.168373	0.412112	no	no
YGR113W::chr7_4	YGR113W	DAM1	-1.83163	0.999936	no	no
YGR114C::chr7_4	YGR114C	YGR114C	0.959141	0.0340514	yes	yes
YGR115C::chr7_4	YGR115C	YGR115C	-0.865575	0.969453	no	no
YGR116W::chr00_14	YGR116W	SPT6	0.540342	0.164587	no	no
YGR117C::chr00_14	YGR117C	YGR117C	0.217282	0.374025	no	no
YGR118W::chr7_4	YGR118W	RPS23A	1.47371	0.0020724	yes	yes
YGR119C::chr7_4	YGR119C	NUP57	-0.362142	0.803111	no	no
YGR120C::chr7_4	YGR120C	COG2	0.6538	0.113974	no	no
YGR121C::chr7_4	YGR121C	MEP1	0.927365	0.0392088	no	no
YGR122C-A::chr00_17a	YGR122C-A	YGR122C-A	0.805803	0.0650586	no	no
YGR122W::chr7_4	YGR122W	YGR122W	0.168373	0.412112	no	no
YGR123C::chr7_5	YGR123C	PPT1	0.524517	0.172658	no	no
YGR124W::chr7_5	YGR124W	ASN2	-0.349476	0.795916	no	no
YGR125W::chr7_5	YGR125W	YGR125W	-0.104646	0.6297	no	no
YGR126W::chr7_5	YGR126W	YGR126W	0.0461459	0.510186	no	no
YGR127W::chr7_5	YGR127W	YGR127W	0.168373	0.412112	no	no
YGR128C::chr7_5	YGR128C	UTP8	0.490301	0.190954	no	no
YGR129W::chr7_5	YGR129W	SYF2	-0.865575	0.969453	no	no
YGR131W::chr7_5	YGR131W	FHN1	0.467933	0.203533	no	no
YGR132C::chr7_5	YGR132C	PHB1	0.00327822	0.544743	no	no
YGR133W::chr7_5	YGR133W	PEX4	-0.706096	0.939391	no	no
YGR134W::chr00_8	YGR134W	CAF130	0.216467	0.374651	no	no
YGR135W::chr7_5	YGR135W	PRE9	-0.174515	0.68176	no	no
YGR136W::chr7_5	YGR136W	LSB1	-0.393506	0.820254	no	no
YGR137W::chr7_5	YGR137W	YGR137W	0.288838	0.320538	no	no
YGR138C::chr7_5	YGR138C	TPO2	0.22356	0.369216	no	no
YGR139W::chr7_5	YGR139W	YGR139W	-0.160935	0.67188	no	no
YGR140W::chr7_5	YGR140W	CBF2	0.372731	0.262331	no	no
YGR141W::chr7_5	YGR141W	VPS62	0.106972	0.461082	no	no
YGR142W::chr7_5	YGR142W	BTN2	0.10704	0.461028	no	no
YGR143W::chr7_5	YGR143W	SKN1	-0.223945	0.716602	no	no
YGR144W::chr7_5	YGR144W	THI4	0.101259	0.465681	no	no
YGR145W::chr00_15	YGR145W	ENP2	0.987801	0.0298913	no	no
YGR146C::chr7_5	YGR146C	ECL1	0.69562	0.098457	no	no
YGR147C::chr7_5	YGR147C	NAT2	-0.161776	0.672495	no	no
YGR148C::chr7_5	YGR148C	RPL24B	-0.144785	0.659972	no	no
YGR150C::chr7_5	YGR150C	CCM1	0.0319304	0.521667	no	no
YGR151C::chr7_5	YGR151C	YGR151C	-0.317054	0.7768	no	no
YGR153W::chr7_5	YGR153W	YGR153W	-0.520996	0.879932	no	no
YGR154C::chr7_5	YGR154C	GTO1	0.222821	0.369781	no	no
YGR155W::chr00_11	YGR155W	CYS4	0.97151	0.0322009	no	no
YGR155W::chr7_5	YGR155W	CYS4	0.130405	0.442282	no	no
YGR156W::chr7_5	YGR156W	PTI1	-0.254839	0.737407	no	no
YGR158C::chr7_5	YGR158C	MTR3	-0.045752	0.583842	no	no
YGR159C::chr7_5	YGR159C	NSR1	0.402838	0.242846	no	no
YGR160W::chr7_5	YGR160W	YGR160W	-0.428868	0.838419	no	no
YGR161C::chr7_5	YGR161C	RTS3	0.665872	0.109326	no	no
YGR162W::chr00_17a	YGR162W	TIF4631	-0.176275	0.683031	no	no
YGR163W::chr7_5	YGR163W	GTR2	-0.890521	0.972782	no	no
YGR164W::chr7_5	YGR164W	YGR164W	0.558319	0.155721	no	no
YGR165W::chr7_5	YGR165W	MRPS35	0.713807	0.0922141	no	no
YGR167W::chr7_5	YGR167W	CLC1	0.0371283	0.51747	no	no
YGR168C::chr7_5	YGR168C	YGR168C	0.366312	0.266587	no	no
YGR169C::chr7_5	YGR169C	PUS6	0.00610136	0.542475	no	no
YGR170W::chr7_5	YGR170W	PSD2	-0.334128	0.786991	no	no
YGR171C::chr7_5	YGR171C	MSM1	-0.246665	0.73198	no	no
YGR172C::chr7_5	YGR172C	YIP1	-0.0180403	0.56182	no	no
YGR173W::chr7_5	YGR173W	RBG2	0.975728	0.0315893	no	no
YGR174C::chr7_5	YGR174C	CBP4	0.111789	0.457209	no	no
YGR175C::chr7_5	YGR175C	ERG1	-0.437348	0.842591	no	no
YGR176W::chr7_5	YGR176W	YGR176W	-0.141967	0.657878	no	no
YGR177C::chr7_5	YGR177C	ATF2	-0.665617	0.928903	no	no
YGR178C::chr7_5	YGR178C	PBP1	0.0163697	0.534213	no	no
YGR179C::chr7_5	YGR179C	OKP1	0.0979835	0.468319	no	no
YGR180C::chr7_5	YGR180C	RNR4	-0.483704	0.864135	no	no
YGR181W::chr7_5	YGR181W	TIM13	-0.205086	0.703525	no	no
YGR182C::chr7_5	YGR182C	YGR182C	-0.364501	0.804434	no	no
YGR183C::chr7_5	YGR183C	QCR9	-0.303696	0.768636	no	no
YGR184C::chr7_5	YGR184C	UBR1	-0.0686664	0.601859	no	no
YGR185C::chr7_5	YGR185C	TYS1	0.409381	0.238718	no	no
YGR186W::chr7_5	YGR186W	TFG1	-0.38052	0.813273	no	no
YGR187C::chr7_5	YGR187C	HGH1	0.275288	0.330425	no	no
YGR188C::chr00_10	YGR188C	BUB1	-0.459658	0.853225	no	no
YGR189C::chr7_5	YGR189C	CRH1	-0.089425	0.617995	no	no
YGR190C::chr7_5	YGR190C	YGR190C	-0.5826	0.903108	no	no
YGR191W::chr7_5	YGR191W	HIP1	0.831338	0.0587472	no	no
YGR192C::chr7_5	YGR192C	TDH3	-0.0868843	0.616031	no	no
YGR193C::chr7_5	YGR193C	PDX1	0.736749	0.0847633	yes	yes
YGR194C::chr7_5	YGR194C	XKS1	-0.109161	0.63315	no	no
YGR195W::chr7_5	YGR195W	SKI6	0.300823	0.311898	no	no
YGR196C::chr7_5	YGR196C	FYV8	-0.461678	0.854163	no	no
YGR197C::chr7_5	YGR197C	SNG1	-0.491552	0.867572	no	no
YGR198W::chr7_5	YGR198W	YPP1	0.340438	0.284086	no	no
YGR199W::chr7_5	YGR199W	PMT6	0.08091	0.482092	no	no
YGR200C::chr7_5	YGR200C	ELP2	-0.386842	0.816692	no	no
YGR201C::chr00_10	YGR201C	YGR201C	-0.243114	0.729604	no	no
YGR202C::chr7_5	YGR202C	PCT1	-0.568593	0.898151	no	no
YGR203W::chr7_5	YGR203W	YCH1	0.390765	0.250565	no	no
YGR204W::chr00_10	YGR204W	ADE3	-0.448299	0.847872	no	no
YGR205W::chr7_5	YGR205W	TDA10	0.101259	0.465681	no	no
YGR206W::chr7_5	YGR206W	MVB12	-0.172052	0.679977	no	no
YGR207C::chr7_5	YGR207C	CIR1	-0.329878	0.78448	no	no
YGR208W::chr7_5	YGR208W	SER2	-0.373777	0.809582	no	no
YGR209C::chr7_5	YGR209C	TRX2	1.39971	0.00329394	yes	yes
YGR210C::chr00_8	YGR210C	YGR210C	-0.0180403	0.56182	no	no
YGR211W::chr7_5	YGR211W	ZPR1	0.261482	0.340621	no	no
YGR212W::chr7_5	YGR212W	SLI1	0.34084	0.283811	no	no
YGR213C::chr7_5	YGR213C	RTA1	-0.817952	0.96216	no	no
[truncated: 3,219 more rows]

## Sheet: flight-ground 21G
Strain	ORF	Gene	Log2ratio	P	DropsOut	Significant
YER074W::chr5_3	YER074W	RPS24A	2.00977	3.85813e-05	yes	yes
YDR536W::chr00_2	YDR536W	STL1	1.85223	0.000139615	yes	yes
YPL268W::chr00_15	YPL268W	PLC1	1.67087	0.000544626	no	yes
YDR002W::chr4_3	YDR002W	YRB1	1.61122	0.000828939	yes	yes
YPR135W::chr16_5	YPR135W	CTF4	1.61122	0.000828939	yes	yes
YLR021W::chr12_1	YLR021W	IRC25	1.60895	0.000842082	no	yes
YKL222C::chr11_3	YKL222C	YKL222C	1.5441	0.0013082	yes	yes
YGR118W::chr7_4	YGR118W	RPS23A	1.47371	0.0020724	yes	yes
YNL178W::chr14_2	YNL178W	RPS3	1.47371	0.0020724	yes	yes
YGR209C::chr7_5	YGR209C	TRX2	1.39971	0.00329394	yes	yes
YHR038W::chr8_1	YHR038W	RRF1	1.39971	0.00329394	yes	yes
YJR123W::chr00_12	YJR123W	RPS5	1.39971	0.00329394	yes	yes
YER114C::chr00_5	YER114C	BOI2	1.32171	0.00524952	yes	yes
YPR144C::chr16_5	YPR144C	NOC4	1.32171	0.00524952	yes	yes
YGL226C-A::chr7_3	YGL226C-A	OST5	1.23925	0.00838151	yes	yes
YOR076C::chr15_1	YOR076C	SKI7	1.23925	0.00838151	yes	yes
YOR168W::chr15_2	YOR168W	GLN4	1.23925	0.00838151	yes	yes
YMR074C::chr00_15	YMR074C	YMR074C	1.15179	0.013392	yes	yes
YNR066C::chr00_4	YNR066C	YNR066C	1.15179	0.013392	yes	yes
YKL161C::chr11_2	YKL161C	KDX1	1.05868	0.0213824	yes	yes
YPR083W::chr00_18	YPR083W	MDM36	1.05868	0.0213824	yes	yes
YDR468C::chr4_8	YDR468C	TLG1	0.959141	0.0340514	yes	yes
YER176W::chr00_5	YER176W	ECM32	0.959141	0.0340514	yes	yes
YGR114C::chr7_4	YGR114C	YGR114C	0.959141	0.0340514	yes	yes
YNL059C::chr00_18	YNL059C	ARP5	0.959141	0.0340514	yes	yes
YOR361C::chr15_4	YOR361C	PRT1	0.959141	0.0340514	yes	yes
YNL016W::chr14_4	YNL016W	PUB1	0.894133	0.0452648	yes	yes
YGL123W::chr7_2	YGL123W	RPS2	0.852226	0.0539504	yes	yes
YKL075C::chr11_1	YKL075C	YKL075C	0.852226	0.0539504	yes	yes
YLR417W::chr12_5	YLR417W	VPS36	0.852226	0.0539504	yes	yes
YML085C::chr00_12	YML085C	TUB1	0.852226	0.0539504	yes	yes
YMR251W::chr13_5	YMR251W	GTO3	0.852226	0.0539504	yes	yes
YNL222W::chr14_2	YNL222W	SSU72	0.852226	0.0539504	yes	yes
YOL087C::chr00_6	YOL087C	DUF1	0.852226	0.0539504	yes	yes
YLR064W::chr12_2	YLR064W	PER33	0.793333	0.0683261	yes	yes
YKL054C::chr11_1	YKL054C	DEF1	0.73852	0.0842074	yes	yes
YKR096W::chr00_15	YKR096W	YKR096W	0.736749	0.0847633	yes	yes
YLR100W::chr12_2	YLR100W	ERG27	0.736749	0.0847633	yes	yes
YLR102C::chr12_2	YLR102C	APC9	0.736749	0.0847633	yes	yes
YMR174C::chr00_4	YMR174C	PAI3	0.736749	0.0847633	yes	yes
YOL071W::chr15_5	YOL071W	EMI5	0.736749	0.0847633	yes	yes
YDR231C::chr4_5	YDR231C	COX20	0.70191	0.0962639	yes	yes
YKL176C::chr11_2	YKL176C	LST4	0.695152	0.0986215	yes	yes
YLR065C::chr12_2	YLR065C	ENV10	0.660882	0.11123	yes	yes
YDR158W::chr4_5	YDR158W	HOM2	0.618654	0.128303	yes	yes
YER013W::chr5_2	YER013W	PRP22	0.611218	0.131488	yes	yes
YIR034C::chr00_3	YIR034C	LYS1	0.611218	0.131488	yes	yes
YMR260C::chr13_5	YMR260C	TIF11	0.611218	0.131488	yes	yes
YPL028W::chr16_3	YPL028W	ERG10	0.611218	0.131488	yes	yes
YPL102C::chr16_2	YPL102C	YPL102C	0.611218	0.131488	yes	yes
YPL089C::chr16_3	YPL089C	RLM1	0.549157	0.160199	yes	yes
YJR035W::chr00_13	YJR035W	RAD26	0.423967	0.229654	yes	yes
YPL027W::chr00_17b	YPL027W	SMA1	0.423967	0.229654	yes	yes
YKL101W::chr11_2	YKL101W	HSL1	0.407526	0.239885	yes	yes
YLR090W::chr12_2	YLR090W	XDJ1	0.403386	0.242499	yes	yes
YPR041W::chr16_4	YPR041W	TIF5	0.378295	0.258671	yes	yes
YGR093W::chr00_14	YGR093W	YGR093W	0.361322	0.269919	yes	yes
YLL023C::chr12_1	YLL023C	POM33	0.361322	0.269919	yes	yes
YIL052C::chr9_1	YIL052C	RPL34B	0.35276	0.275684	yes	yes
YPL081W::chr16_3	YPL081W	RPS9A	0.344147	0.281545	yes	yes
YAL047C::chr00_12	YAL047C	SPC72	0.335482	0.2875	yes	yes
YHR074W::chr8_2	YHR074W	QNS1	0.326765	0.293551	yes	yes
YDR077W::chr4_4	YDR077W	SED1	0.236567	0.359316	yes	yes
YDR289C::chr4_6	YDR289C	RTT103	0.227229	0.366414	yes	yes
YGR096W::chr7_4	YGR096W	TPC1	0.194062	0.391979	yes	yes
YHR123W::chr8_2	YHR123W	EPT1	0.194062	0.391979	yes	yes
YDR303C::chr4_6	YDR303C	RSC3	0.189261	0.395721	yes	yes
YLR098C::chr12_2	YLR098C	CHA4	0.184444	0.399486	yes	yes
YLR057W::chr12_2	YLR057W	MNL2	0.1552	0.42253	yes	yes
YLR120C::chr12_2	YLR120C	YPS1	0.135368	0.438315	yes	yes
YLR124W::chr12_2	YLR124W	YLR124W	0.12535	0.446328	yes	yes
YDR376W::chr4_7	YDR376W	ARH1	0.084564	0.479142	yes	yes
YLR257W::chr12_4	YLR257W	YLR257W	0.0741849	0.487524	yes	yes
YOR287C::chr15_3	YOR287C	RRP36	0.0637305	0.495973	yes	yes

## Sheet: flight-ground processes 21G
GO process	Query set fraction	Process fraction	Fold enrichment	P	FDR	Overlap genes
POSTTRANSCRIPTIONAL REGULATION OF GENE EXPRESSION	0.0945946	0.118644	4.43633	0.000823357	0.516435	RPS23A(1.47)|RPS5(1.4)|SKI7(1.24)|ECM32(0.96)|PUB1(0.89)|RPS2(0.85)|TIF5(0.38)
NUCLEIC ACID TRANSPORT	0.0810811	0.122449	4.5786	0.00167489	0.516435	YRB1(1.61)|RPS3(1.47)|RPS5(1.4)|RPS2(0.85)|PER33(0.79)|POM33(0.36)
RNA TRANSPORT	0.0810811	0.122449	4.5786	0.00167489	0.516435	YRB1(1.61)|RPS3(1.47)|RPS5(1.4)|RPS2(0.85)|PER33(0.79)|POM33(0.36)
ESTABLISHMENT OF RNA LOCALIZATION	0.0810811	0.122449	4.5786	0.00167489	0.516435	YRB1(1.61)|RPS3(1.47)|RPS5(1.4)|RPS2(0.85)|PER33(0.79)|POM33(0.36)
REGULATION OF TRANSLATION	0.0810811	0.115385	4.31445	0.00228844	0.516435	RPS23A(1.47)|RPS5(1.4)|SKI7(1.24)|ECM32(0.96)|RPS2(0.85)|TIF5(0.38)
REGULATION OF TRANSLATIONAL FIDELITY	0.0405405	0.272727	10.1978	0.00259701	0.516435	RPS23A(1.47)|RPS5(1.4)|RPS2(0.85)
RNA LOCALIZATION	0.0810811	0.111111	4.15465	0.00278295	0.516435	YRB1(1.61)|RPS3(1.47)|RPS5(1.4)|RPS2(0.85)|PER33(0.79)|POM33(0.36)
NUCLEOBASE-CONTAINING COMPOUND TRANSPORT	0.0810811	0.105263	3.93599	0.00366998	0.562626	YRB1(1.61)|RPS3(1.47)|RPS5(1.4)|RPS2(0.85)|PER33(0.79)|POM33(0.36)
RRNA EXPORT FROM NUCLEUS	0.0405405	0.230769	8.6289	0.00433123	0.562626	RPS3(1.47)|RPS5(1.4)|RPS2(0.85)
RRNA TRANSPORT	0.0405405	0.230769	8.6289	0.00433123	0.562626	RPS3(1.47)|RPS5(1.4)|RPS2(0.85)
REGULATION OF TRANSLATIONAL ELONGATION	0.0405405	0.2	7.47838	0.00663053	0.602905	RPS23A(1.47)|RPS5(1.4)|RPS2(0.85)
TRANSCRIPTION-COUPLED NUCLEOTIDE-EXCISION REPAIR	0.027027	0.4	14.9568	0.00669763	0.602905	DEF1(0.74)|RAD26(0.42)
LYSINE METABOLIC PROCESS	0.027027	0.4	14.9568	0.00669763	0.602905	HOM2(0.62)|LYS1(0.61)
LYSINE BIOSYNTHETIC PROCESS	0.027027	0.4	14.9568	0.00669763	0.602905	HOM2(0.62)|LYS1(0.61)
MATURATION OF SSU-RRNA FROM TRICISTRONIC RRNA TRANSCRIPT (SSU-RRNA, 5.8S RRNA, LSU-RRNA)	0.0675676	0.108696	4.06434	0.00696195	0.602905	RPS24A(2.01)|RPS23A(1.47)|NOC4(1.32)|RPS9A(0.34)|RRP36(0.06)
MATURATION OF SSU-RRNA	0.0675676	0.104167	3.89499	0.00834379	0.677412	RPS24A(2.01)|RPS23A(1.47)|NOC4(1.32)|RPS9A(0.34)|RRP36(0.06)
