# Supplementary material for: Genes Required for Survival in Microgravity Revealed by Genome-Wide Yeast Deletion Collections Cultured during Spaceflight
Source: Biomed Res Int. 2015 Jan 13;2015:976458. doi: 10.1155/2015/976458 (PMC4309212; doi:10.1155/2015/976458)
Supplement: Supplementary file 1 — Supplementary tables 1 and 2 provide the Illumina sequencing counts for each barcode/strain of each sample following mean normalization for the homozygous strains (Supplementary Table S1) and the heterozygous deletion strains (Supplementary Table S2). Supplementary tables 3 and 4 list those strains in the homozygous deletion collection (Supplementary Table S3) and the heterozygous deletion collection (Supplementary Table S4) that were excluded from the analysis for technical reasons. Supplementary tables 5 and 6 contain the results from the analysis of the homozygous deletion collection, comparing ground experiments to flight experiments in YPD media (Supplementary Table S5) and in YPD media + 0.5M NaCl (Supplementary Table S6). Supplementary table S7 contains the concordance in GO enrichments of the experiments presented in this study to a compendium of published data (reference 13). Supplementary tables 8 and 9 contain the results from the analysis of the heterozygous deletion collection, comparing ground experiments to flight experiments in YPD media (Supplementary Table S8) and in YPD media + 0.5M NaCl (Supplementary Table S9). [file 976458.f1.zip › TableS9_vsT1-het1-NaCl-dropsToBg.xlsx]

## Sheet: README
Table S9. Genes associated with flight based on fitness defects at different time points, observed for heterozygous deletion strains grown in NaCl.
ground and flight sheets
Assessment of whether or not each strain exhibited signficant fitness defects at later time points, in different conditions (see sheet name).
Column	Description
Strain	a strain in the pool
ORF	the ORF deleted from the strain
Gene	the gene name associated with the deleted ORF
Log2ratio, 14G/21G	log2(<abundance7G>/<abundance14G/21G>) where abundanceYG represents the abundance of the strain at Y generations; larger values indicate a greater reduction in strain abundance at the later time point
P, 14/21G	significance of the reduction in strain abundance at 14/21G vs. 7G (see Methods)
Drops out, 14/21G	yes, if the strain abundance at 7G is above the background level but drops below that level at 14/21G; no, otherwise (see Methods)
Significant, 14/21G	yes, if the fitness defect at 14/21G vs. 7G is significant; specifically, (log2ratio >= 1 & P <= 0.001) or the strain drops out; no, otherwise
flight-ground sheets
Strains that exhibited signfiicant fitness defects at 14/21 generations in the flight condition but not in the ground condition.
Columns are as described for the ground and flight sheets.
flight-ground processessheets
Gene Ontology (GO) biological processes enriched (P <= 0.01) amongst flight-associated genes at 14/21 generations (see flight-ground sheets).
Column	Description
GO process	enriched GO biological process
Query set fraction	fraction of the flight genes that are annotated to the process
Process fraction	fraction of the process genes that are associated with flight
Fold enrichment	fold enrichment = <query set fraction>/<fraction of the gene universe annotated to the process>
P	P value measuring the significance of enrichment (hypergeometric test)
FDR	false discovery rate, P corrected for multiple comparisons (see Methods)
Overlap genes	|-separated list of flight-associated genes that are annotated to the process (flight log2ratios are shown in parentheses)

## Sheet: ground
Strain	ORF	Gene	Log2ratio, 14G	Log2ratio, 21G	P, 14G	P, 21G	Drops out, 14G	Drops out, 21G	Significant, 14G	Significant, 21G
YAL016W::chr00_12	YAL016W	TPD3	-0.0807768	0.493799	0.611948	0.0874589	no	no	no	no
YAL047C::chr00_12	YAL047C	SPC72	-0.0254568	0.507912	0.552957	0.0812316	no	no	no	no
YAL054C::chr00_12	YAL054C	ACS1	-0.548744	-1.38575	0.94109	0.999969	no	no	no	no
YAL058C-A::chr00_12	YAL056C-A	YAL056C-A	-0.182126	-0.218056	0.712781	0.75	no	no	no	no
YBL007C::chr2_1	YBL007C	SLA1	0.0167884	-0.0485336	0.50703	0.575663	yes	no	yes	no
YBL094C::chr2_1	YBL094C	YBL094C	0.139106	-0.203061	0.375683	0.736211	no	no	no	no
YBL098W::chr2_2	YBL098W	BNA4	0.261411	-0.255848	0.257438	0.782986	yes	no	yes	no
YBL105C::chr2_2	YBL105C	PKC1	0.151438	-0.000907108	0.36296	0.5219	yes	no	yes	no
YBR011C::chr2_2	YBR011C	IPP1	0.0781889	-0.108922	0.440276	0.641738	yes	no	yes	no
YBR020W::chr2_2	YBR020W	GAL1	0.504454	0.130722	0.0941156	0.374241	yes	no	yes	no
YBR036C::chr2_2	YBR036C	CSG2	-0.289025	-0.250618	0.8034	0.778576	no	no	no	no
YBR075W::chr00_18	YBR074W	YBR074W	0.0503154	0.580098	0.470484	0.0544898	no	no	no	no
YBR088C::chr00_16a	YBR088C	POL30	0.0688992	0.0887356	0.450314	0.42041	no	no	no	no
YBR121C::chr00_16a	YBR121C	GRS1	0.140803	-0.279547	0.373924	0.802319	no	no	no	no
YBR157C::chr2_3	YBR157C	ICS2	0.681673	0.93617	0.0358979	0.00441278	no	yes	no	yes
YBR158W::chr2_3	YBR158W	AMN1	-1.46406	-1.38923	0.999976	0.99997	no	no	no	no
YBR191W::chr00_11	YBR191W	RPL21A	0.626672	1.04789	0.0494694	0.0016543	no	no	no	no
YBR202W::chr2_4	YBR202W	MCM7	0.412496	0.246107	0.143577	0.257893	no	no	no	no
YBR203W::chr2_4	YBR203W	COS111	-0.16613	-0.0796718	0.697697	0.610128	no	no	no	no
YBR204C::chr2_4	YBR204C	LDH1	-0.397535	0.0690768	0.875037	0.442452	no	no	no	no
YBR205W::chr2_4	YBR205W	KTR3	-0.211796	-0.22329	0.739776	0.754721	no	no	no	no
YBR206W::chr2_4	YBR206W	YBR206W	-0.145419	-0.103791	0.677656	0.636256	no	no	no	no
YBR207W::chr2_4	YBR207W	FTH1	-0.237091	-0.371759	0.761712	0.867153	no	no	no	no
YBR208C::chr2_4	YBR208C	DUR1,2	-0.846256	-0.654448	0.991285	0.972546	no	no	no	no
YBR209W::chr2_4	YBR209W	YBR209W	-0.15309	-0.282385	0.685143	0.804563	no	no	no	no
YBR210W::chr2_4	YBR210W	ERV15	-0.0917933	0.242615	0.623438	0.261121	no	no	no	no
YBR211C::chr2_4	YBR211C	AME1	-0.145737	-0.0603766	0.677968	0.588855	no	no	no	no
YBR212W::chr2_4	YBR212W	NGR1	0.50178	-0.00831846	0.0953485	0.530318	no	no	no	no
YBR213W::chr2_4	YBR213W	MET8	0.702943	0.284453	0.0315439	0.223847	no	no	no	no
YBR215W::chr2_4	YBR215W	HPC2	-0.661321	-0.428693	0.969384	0.89893	no	no	no	no
YBR217W::chr2_4	YBR217W	ATG12	-0.0303429	-0.0352158	0.558235	0.560727	no	no	no	no
YBR218C::chr2_4	YBR218C	PYC2	0.0408057	0.0744219	0.480838	0.436438	no	no	no	no
YBR219C::chr2_4	YBR219C	YBR219C	-0.556494	-0.541007	0.943538	0.944748	no	no	no	no
YBR220C::chr2_4	YBR220C	YBR220C	-0.262251	-0.255541	0.782486	0.782729	no	no	no	no
YBR221C::chr2_4	YBR221C	PDB1	-0.76177	-0.274962	0.984083	0.798663	no	no	no	no
YBR222C::chr2_4	YBR222C	PCS60	-0.362025	-0.276466	0.853929	0.799867	no	no	no	no
YBR223C::chr2_4	YBR223C	TDP1	0.0997079	-0.763091	0.417181	0.987112	no	no	no	no
YBR224W::chr2_4	YBR224W	YBR224W	0.0606936	0.266187	0.459208	0.239737	no	no	no	no
YBR225W::chr2_4	YBR225W	YBR225W	-0.50705	0.0117995	0.926469	0.507447	no	no	no	no
YBR226C::chr2_4	YBR226C	YBR226C	0.0601194	-0.0535701	0.459831	0.581284	no	no	no	no
YBR227C::chr2_4	YBR227C	MCX1	-0.0711435	-0.131202	0.60182	0.665193	no	no	no	no
YBR228W::chr2_4	YBR228W	SLX1	-0.0513011	-0.0136474	0.580746	0.536362	no	no	no	no
YBR229C::chr2_4	YBR229C	ROT2	-0.144743	-0.0963706	0.676993	0.628279	no	no	no	no
YBR230C::chr2_4	YBR230C	OM14	1.23188	0.24944	0.000475086	0.254831	no	no	yes	no
YBR231C::chr2_4	YBR231C	SWC5	-0.424334	-0.0679413	0.889488	0.59723	no	no	no	no
YBR232C::chr00_8	YBR232C	YBR232C	-1.03371	-0.718053	0.998074	0.982183	no	no	no	no
YBR233W::chr2_4	YBR233W	PBP2	0.159499	0.449919	0.354723	0.109092	no	no	no	no
YBR234C::chr2_4	YBR234C	ARC40	0.136605	-0.158848	0.378281	0.693416	no	no	no	no
YBR235W::chr2_4	YBR235W	YBR235W	-0.38372	0.185086	0.867093	0.317126	no	no	no	no
YBR236C::chr2_4	YBR236C	ABD1	-0.908508	-0.516956	0.994578	0.936658	no	no	no	no
YBR237W::chr2_4	YBR237W	PRP5	-0.0160255	-0.0805944	0.542743	0.611138	no	no	no	no
YBR238C::chr2_4	YBR238C	YBR238C	0.139995	0.250616	0.374762	0.253754	no	no	no	no
YBR239C::chr2_4	YBR239C	ERT1	0.225567	0.430263	0.290045	0.11994	no	no	no	no
YBR240C::chr2_4	YBR240C	THI2	0.455235	0.0234809	0.118752	0.494151	no	no	no	no
YBR241C::chr2_4	YBR241C	YBR241C	0.135833	0.0209803	0.379084	0.496997	no	no	no	no
YBR242W::chr2_4	YBR242W	YBR242W	-0.137458	-0.50164	0.66981	0.931044	no	no	no	no
YBR243C::chr2_4	YBR243C	ALG7	-0.295016	-0.0271248	0.807907	0.551609	no	no	no	no
YBR244W::chr2_4	YBR244W	GPX2	0.064121	0.132896	0.45549	0.371893	no	no	no	no
YBR245C::chr2_4	YBR245C	ISW1	0.334451	0.206467	0.19739	0.295718	no	no	no	no
YBR246W::chr2_4	YBR246W	RRT2	-0.17006	-0.160075	0.701435	0.694644	no	no	no	no
YBR247C::chr2_4	YBR247C	ENP1	-0.105062	0.321116	0.637133	0.19383	no	no	no	no
YBR248C::chr2_4	YBR248C	HIS7	-0.0896213	-0.652657	0.621181	0.972221	no	no	no	no
YBR249C::chr2_4	YBR249C	ARO4	0.351772	0.82721	0.184502	0.0105036	no	no	no	no
YBR250W::chr2_4	YBR250W	SPO23	-0.234792	0.296335	0.759761	0.21384	no	no	no	no
YBR251W::chr2_4	YBR251W	MRPS5	-0.0518477	-0.279652	0.58133	0.802403	no	no	no	no
YBR252W::chr2_4	YBR252W	DUT1	0.276451	0.367212	0.244347	0.159773	no	no	no	no
YBR253W::chr2_4	YBR253W	SRB6	-0.144603	-0.177679	0.676856	0.712017	no	no	no	no
YBR254C::chr2_4	YBR254C	TRS20	0.08203	0.29388	0.436137	0.215886	no	no	no	no
YBR255W::chr2_4	YBR255W	MTC4	0.0258913	-0.318647	0.4971	0.831848	no	no	no	no
YBR256C::chr2_4	YBR256C	RIB5	-0.241457	-0.245966	0.765393	0.774612	no	no	no	no
YBR257W::chr2_4	YBR257W	POP4	0.250227	1.59813	0.267404	3.28083e-06	no	no	no	yes
YBR259W::chr2_4	YBR259W	YBR259W	-0.273235	-0.456638	0.791217	0.912325	no	no	no	no
YBR260C::chr2_4	YBR260C	RGD1	-0.659756	-0.633209	0.969087	0.968486	no	no	no	no
YBR261C::chr2_4	YBR261C	TAE1	1.33387	3.93617	0.000169354	2.60351e-29	no	yes	yes	yes
YBR263W::chr2_4	YBR263W	SHM1	-0.204309	-0.217936	0.733089	0.749891	no	no	no	no
YBR264C::chr2_4	YBR264C	YPT10	-0.0651398	0.250518	0.595472	0.253844	no	no	no	no
YBR265W::chr2_4	YBR265W	TSC10	-0.559787	0.5697	0.944553	0.0578444	no	no	no	no
YBR266C::chr2_4	YBR266C	SLM6	-0.710564	-0.561525	0.977597	0.950984	no	no	no	no
YBR267W::chr2_4	YBR267W	REI1	-0.802256	0.111785	0.988002	0.394885	no	no	no	no
YBR268W::chr2_4	YBR268W	MRPL37	-0.32044	-0.220647	0.826321	0.752343	no	no	no	no
YBR270C::chr00_16a	YBR270C	BIT2	0.220582	0.264798	0.294729	0.24097	no	no	no	no
YBR272C::chr00_16a	YBR272C	HSM3	0.0525532	0.294254	0.46805	0.215574	no	no	no	no
YBR276C::chr00_16a	YBR276C	PPS1	0.282719	0.449088	0.238998	0.109536	no	no	no	no
YBR277C::chr00_1	YBR277C	YBR277C	0.128511	0.447944	0.386724	0.110149	no	no	no	no
YBR278W::chr00_1	YBR278W	DPB3	0.547235	0.591259	0.0759562	0.0510623	no	yes	no	yes
YBR284W::chr00_1	YBR284W	YBR284W	0.300027	0.250734	0.224569	0.253647	no	no	no	no
YBR287W::chr00_16a	YBR287W	YBR287W	0.369519	0.218548	0.171852	0.283924	no	no	no	no
YBR288C::chr00_16a	YBR288C	APM3	-0.163699	-0.149837	0.695374	0.684333	no	no	no	no
YBR294W::chr00_16a	YBR294W	SUL1	0.010642	0.164751	0.513732	0.338071	no	no	no	no
YBR297W::chr00_1	YBR297W	MAL33	0.402509	0.691644	0.14985	0.0273621	no	no	no	no
YBR298C::chr00_1	YBR298C	MAL31	0.0346334	0.175205	0.487566	0.327236	no	no	no	no
YBR301W::chr00_16a	YBR301W	PAU24	-0.259836	-0.293231	0.780538	0.812992	no	no	no	no
YCL001W-A::chr00_1	YCL001W-A	YCL001W-A	0.325251	0.716567	0.204451	0.0231763	no	no	no	no
YCL001W::chr3_1	YCL001W	RER1	-0.0677895	-0.0752162	0.598277	0.605242	no	no	no	no
YCL002C::chr3_1	YCL002C	YCL002C	0.341292	0.385745	0.192236	0.147257	no	no	no	no
YCL003W::chr3_1	YCL004W	PGS1	-0.103831	0.135315	0.63587	0.369286	no	no	no	no
YCL004W::chr3_1	YCL004W	PGS1	0.0979064	-0.039695	0.419105	0.565761	no	no	no	no
YCL005W::chr3_1	YCL005W	LDB16	-0.109646	-0.238172	0.641824	0.76788	no	no	no	no
YCL006C::chr3_1/chr00_12	deleted	YCL006C	-0.227125	0.0395126	0.753192	0.475917	no	no	no	no
YCL007C::chr3_1	YCL007C	YCL007C	-0.0957533	-0.434862	0.627543	0.902008	no	no	no	no
YCL008C::chr3_1	YCL008C	STP22	0.129372	0.190929	0.385824	0.31121	no	no	no	no
YCL010C::chr3_1	YCL010C	SGF29	-0.799339	-0.554972	0.98775	0.949057	no	no	no	no
YCL012W::chr3_1	YCL014W	BUD3	0.548416	0.627106	0.0754956	0.0412007	no	no	no	no
YCL013W::chr3_1	deleted	YCL013W	0.130583	0.191131	0.384558	0.311007	no	no	no	no
YCL014W::chr3_1	YCL014W	BUD3	-0.0872925	0.0704022	0.618757	0.44096	no	no	no	no
YCL016C::chr3_1	YCL016C	DCC1	-0.138696	-0.303096	0.671035	0.820461	no	no	no	no
YCL017C::chr3_1	YCL017C	NFS1	-0.384319	-0.222294	0.867445	0.753827	no	no	no	no
YCL023C::chr3_1/chr00_12	YCL023C	YCL023C	0.0531782	0.115255	0.467371	0.391078	no	no	no	no
YCL024W::chr3_1	YCL024W	KCC4	0.0041836	0.126875	0.520771	0.378408	no	no	no	no
YCL026C-A::chr00_16a	YCL026C-A	FRM2	-0.237626	-0.484728	0.762164	0.924407	no	no	no	no
YCL026C::chr3_1	deleted	YCL026C	0.183373	0.27589	0.330736	0.231221	no	no	no	no
YCL027W::chr3_1	YCL027W	FUS1	-0.13851	-0.230686	0.670851	0.761311	no	no	no	no
YCL028W::chr3_1	YCL028W	RNQ1	-0.105902	0.0454941	0.637994	0.469125	no	no	no	no
YCL029C::chr3_1	YCL029C	BIK1	-0.639113	-0.866415	0.964937	0.994205	no	no	no	no
YCL030C::chr3_1	YCL030C	HIS4	-0.282805	-0.605473	0.798653	0.962451	no	no	no	no
YCL032W::chr3_1	YCL032W	STE50	-0.130122	-0.312941	0.662512	0.827726	no	no	no	no
YCL033C::chr3_1	YCL033C	MXR2	-0.163503	-0.045285	0.695186	0.572029	no	no	no	no
YCL034W::chr3_1	YCL034W	LSB5	0.382321	0.0410995	0.16308	0.474115	no	no	no	no
YCL036W::chr3_1	YCL036W	GFD2	-0.535765	-0.262492	0.936806	0.788514	no	no	no	no
YCL037C::chr3_1	YCL037C	SRO9	-0.320831	0.300581	0.826595	0.210328	no	yes	no	yes
YCL039W::chr3_1	YCL039W	GID7	0.307031	0.180552	0.218873	0.321749	no	no	no	no
YCL040W::chr3_1	YCL040W	GLK1	-0.903417	-0.847727	0.994358	0.993264	no	no	no	no
YCL041C::chr3_1	YCL041C	YCL041C	-0.101161	-0.0742409	0.633123	0.604171	no	no	no	no
YCL042W::chr3_1	YCL042W	YCL042W	-0.522513	-0.509388	0.932185	0.93393	no	no	no	no
YCL043C::chr3_1	YCL043C	PDI1	-0.623759	-0.177103	0.961562	0.711455	no	no	no	no
YCL044C::chr3_1	YCL044C	MGR1	-0.252668	-0.115357	0.774699	0.648572	no	no	no	no
YCL045C::chr3_1	YCL045C	EMC1	-0.332612	-0.245461	0.834725	0.77418	no	no	no	no
YCL047C::chr3_1	YCL047C	POF1	-0.179019	-0.0555654	0.709879	0.583507	no	no	no	no
YCL048W::chr3_1	YCL048W	SPS22	-1.01273	-0.509327	0.997692	0.933907	no	no	no	no
YCL049C::chr3_1	YCL049C	YCL049C	0.017109	0.271976	0.50668	0.234635	no	no	no	no
YCL050C::chr3_1	YCL050C	APA1	-0.310803	0.108884	0.819478	0.398075	no	no	no	no
YCL051W::chr3_1	YCL051W	LRE1	0.330901	0.10525	0.200097	0.402081	no	no	no	no
YCL053C::chr3_1	deleted	YCL053C	0.144468	0.380729	0.370133	0.150578	no	no	no	no
YCL054W::chr3_1	YCL054W	SPB1	-0.35188	0.0471408	0.847482	0.467257	no	no	no	no
YCL055W::chr3_1	YCL055W	KAR4	-0.335167	-0.367419	0.836456	0.864476	no	no	no	no
YCL056C::chr3_1	YCL056C	PEX34	0.0599616	-0.0306029	0.460002	0.555532	no	no	no	no
YCL057W::chr3_1	YCL057W	PRD1	-0.147866	-0.429294	0.680053	0.899233	no	no	no	no
YCL058C::chr00_12	YCL058C	FYV5	-0.909588	-0.983053	0.994624	0.997863	no	no	no	no
YCL059C::chr3_1	YCL059C	KRR1	-0.151011	-0.250941	0.683122	0.77885	no	no	no	no
YCL060C::chr3_1	YCL061C	MRC1	-0.292297	-0.266906	0.805868	0.792139	no	no	no	no
YCL061C::chr3_1	YCL061C	MRC1	0.0328577	0.0419206	0.489502	0.473182	no	no	no	no
YCL062W::chr3_1	YCL063W	VAC17	0.029117	0.0721853	0.493582	0.438953	no	no	no	no
YCL063W::chr3_1	YCL063W	VAC17	0.325794	0.29586	0.20403	0.214236	no	no	no	no
YCL064C::chr3_1	YCL064C	CHA1	-0.131119	-0.0716109	0.663507	0.601277	no	no	no	no
YCL069W::chr3_1	YCL069W	VBA3	-0.250706	-0.177935	0.773086	0.712266	no	no	no	no
YCL075W::chr00_12	YCL075W	YCL075W	-0.142523	-0.1835	0.674811	0.717657	no	no	no	no
YCL076W::chr00_12	YCL076W	YCL076W	-0.461868	-0.344967	0.907653	0.850036	no	no	no	no
YCR002C::chr3_1	YCR002C	CDC10	0.506167	0.855998	0.0933318	0.00842437	no	no	no	no
YCR004C::chr3_1	YCR004C	YCP4	0.264276	-0.0708633	0.254916	0.600453	no	no	no	no
YCR005C::chr3_1	YCR005C	CIT2	-0.340493	-0.11068	0.840025	0.64361	no	no	no	no
YCR006C::chr3_1	YCR006C	YCR006C	0.373138	0.681378	0.169343	0.0292609	no	no	no	no
YCR007C::chr3_1	YCR007C	YCR007C	-0.298811	-0.310337	0.810729	0.825822	no	no	no	no
YCR008W::chr3_1	YCR008W	SAT4	0.451319	0.590969	0.120892	0.0511491	no	no	no	no
YCR009C::chr3_1	YCR009C	RVS161	-0.130521	0.247452	0.662911	0.256655	no	no	no	no
YCR010C::chr3_1	YCR010C	ADY2	0.104036	0.0985777	0.412568	0.409463	no	no	no	no
YCR011C::chr3_1	YCR011C	ADP1	-0.558331	-0.276348	0.944106	0.799772	no	no	no	no
YCR012W::chr00_11	YCR012W	PGK1	0.0467293	0.238483	0.474387	0.264968	no	no	no	no
YCR012W::chr3_1	YCR012W	PGK1	0.0501896	0.0370402	0.470621	0.478727	no	no	no	no
YCR014C::chr3_1	YCR014C	POL4	-0.0638952	-0.1858	0.594153	0.71987	no	no	no	no
YCR015C::chr3_1	YCR015C	YCR015C	-0.0561812	0.0117061	0.585953	0.507553	no	no	no	no
YCR016W::chr3_1	YCR016W	YCR016W	-0.202626	-0.121974	0.731574	0.655551	no	no	no	no
YCR017C::chr3_1	YCR017C	CWH43	-0.416258	-0.122509	0.885266	0.656112	no	no	no	no
YCR019W::chr3_1	YCR019W	MAK32	-0.961245	-1.1327	0.996448	0.999489	no	no	no	no
YCR020C-A::chr3_1	YCR020C-A	MAK31	-0.569751	-0.243347	0.947538	0.772363	no	no	no	no
YCR020C::chr3_1	YCR020C	PET18	-0.109511	-0.163247	0.641687	0.697809	no	no	no	no
YCR020W-B::chr00_1	YCR020W-B	HTL1	0.523423	0.481902	0.0857031	0.0929801	no	no	no	no
YCR021C::chr3_1	YCR021C	HSP30	-0.244785	-0.164959	0.768177	0.699511	no	no	no	no
YCR022C::chr3_1	YCR022C	YCR022C	0.315913	0.248268	0.211771	0.255905	no	no	no	no
YCR023C::chr3_1	YCR023C	YCR023C	0.201849	0.316897	0.312633	0.197153	no	no	no	no
YCR026C::chr00_1	YCR026C	NPP1	-0.497128	0.296655	0.922611	0.213575	no	no	no	no
YCR028C-A::chr00_16a	YCR028C-A	RIM1	-0.0704396	-0.0104689	0.601077	0.532758	no	no	no	no
YCR028C::chr00_1	YCR028C	FEN2	0.112303	-0.0066321	0.40379	0.528403	no	no	no	no
YCR030C::chr00_16a	YCR030C	SYP1	0.0112017	-0.0843359	0.513122	0.615224	no	no	no	no
YCR031C::chr00_1	YCR031C	RPS14A	-0.0918827	0.0890226	0.623531	0.42009	no	no	no	no
YCR032W::chr00_16a	YCR032W	BPH1	-0.140663	-0.0410769	0.672978	0.567312	no	no	no	no
YCR034W::chr00_1	YCR034W	FEN1	0.984521	0.118227	0.00428804	0.387826	no	no	no	no
YCR036W::chr00_1	YCR036W	RBK1	0.462471	-0.0403013	0.114869	0.566441	no	no	no	no
YCR044C::chr00_1	YCR044C	PER1	0.44471	0.754798	0.124564	0.0178095	no	no	no	no
YCR048W::chr00_16a	YCR048W	ARE1	-0.204104	0.126004	0.732905	0.379354	no	no	no	no
YCR049C::chr00_1	YCR049C	YCR049C	0.277275	0.52238	0.24364	0.0752007	no	no	no	no
YCR050C::chr00_1	YCR050C	YCR050C	0.325911	0.346862	0.20394	0.174294	no	no	no	no
YCR051W::chr00_1	YCR051W	YCR051W	0.254182	-0.151469	0.263858	0.685986	no	no	no	no
YCR052W::chr00_1	YCR052W	RSC6	0.588405	1.49603	0.0611269	1.24275e-05	no	no	no	yes
YCR060W::chr00_16a	YCR060W	TAH1	-0.109654	-0.162992	0.641833	0.697555	no	no	no	no
YCR062W::chr00_16a	YCR061W	YCR061W	-0.114107	0.0582581	0.646369	0.454664	no	no	no	no
YCR072C::chr00_16a	YCR072C	RSA4	0.334238	0.252836	0.197552	0.25173	no	no	no	no
YCR073C::chr00_16a	YCR073C	SSK22	-1.09959	-1.26403	0.99893	0.999873	no	no	no	no
YCR077C::chr00_1	YCR077C	PAT1	-0.010399	0.134397	0.536636	0.370275	no	no	no	no
YCR079W::chr00_1	YCR079W	PTC6	0.705181	0.538345	0.0311125	0.0689485	no	no	no	no
YCR081W::chr00_1	YCR081W	SRB8	-0.347958	0.37447	0.84494	0.154791	no	no	no	no
YCR083W::chr00_16a	YCR083W	TRX3	0.249832	0.211853	0.26776	0.290432	no	no	no	no
YCR084C::chr00_16a	YCR084C	TUP1	0.51423	0.536485	0.0897071	0.0696556	no	no	no	no
YCR086W::chr00_1	YCR086W	CSM1	-0.252228	-0.140103	0.774338	0.674393	no	no	no	no
YCR087C-A::chr00_1	YCR087C-A	YCR087C-A	0.102714	0.312341	0.413976	0.200781	no	no	no	no
YCR088W::chr00_16a	YCR088W	ABP1	-0.0103625	0.0960888	0.536596	0.412225	no	no	no	no
YCR092C::chr00_2	YCR092C	MSH3	-1.54074	-1.40656	0.999991	0.999976	no	no	no	no
YCR094W::chr00_2	YCR094W	CDC50	0.328792	0.204073	0.201716	0.298081	no	no	no	no
YCR100C::chr00_2	YCR100C	YCR100C	0.1066	0.469751	0.409841	0.098881	no	no	no	no
YCR102W-A::chr00_14	YCR102W-A	YCR102W-A	0.363161	0.135279	0.176319	0.369325	no	no	no	no
YCR107W::chr00_17a	YCR107W	AAD3	0.0152695	-0.0181442	0.508686	0.541456	no	no	no	no
YDL002C::chr4_1	YDL002C	NHP10	-0.121378	0.340705	0.653734	0.178849	no	no	no	no
YDL003W::chr4_1	YDL003W	MCD1	-0.0705296	-0.28765	0.601172	0.808683	no	no	no	no
YDL004W::chr4_1	YDL004W	ATP16	-0.17737	-0.0438172	0.708333	0.570384	no	no	no	no
YDL005C::chr4_1	YDL005C	MED2	-0.206797	-0.567785	0.735321	0.952771	no	no	no	no
YDL006W::chr4_1	YDL006W	PTC1	-0.00843354	0.0698635	0.534501	0.441566	no	no	no	no
YDL007W::chr4_1	YDL007W	RPT2	-0.155654	-0.369564	0.687629	0.865803	no	no	no	no
YDL008W::chr4_1	YDL008W	APC11	-0.23922	-0.203843	0.763511	0.736939	no	no	no	no
YDL009C::chr4_1	YDL009C	YDL009C	-0.611591	-0.928814	0.958704	0.996558	no	no	no	no
YDL010W::chr4_1	YDL010W	GRX6	-0.354178	-0.268601	0.848959	0.793523	no	no	no	no
YDL011C::chr4_1	YDL011C	YDL011C	-0.20124	-0.315703	0.730323	0.829729	no	no	no	no
YDL012C::chr4_1	YDL012C	YDL012C	-0.215816	-0.112062	0.74333	0.645079	no	no	no	no
YDL013W::chr4_1	YDL013W	SLX5	-0.482745	-0.241552	0.916748	0.770813	no	no	no	no
YDL014W::chr4_1	YDL014W	NOP1	-0.187065	0.0134817	0.717365	0.505533	no	no	no	no
YDL015C::chr4_1	YDL015C	TSC13	-0.265317	0.0598384	0.784944	0.452877	no	no	no	no
YDL016C::chr4_1	YDL016C	YDL016C	-0.299113	-0.475096	0.810952	0.920416	no	no	no	no
YDL017W::chr4_1	YDL017W	CDC7	-0.292894	-0.253236	0.806317	0.780791	no	no	no	no
YDL018C::chr4_1	YDL018C	ERP3	-0.0545714	0.00978193	0.584237	0.509743	no	no	no	no
YDL019C::chr4_1	YDL019C	OSH2	0.114622	0.143677	0.401336	0.36032	no	no	no	no
YDL020C::chr4_1	YDL020C	RPN4	-0.21488	0.0640541	0.742505	0.448115	no	no	no	no
YDL021W::chr4_1	YDL021W	GPM2	-0.427235	0.0156698	0.890977	0.503042	no	no	no	no
YDL022W::chr4_1	YDL022W	GPD1	0.331616	0.412129	0.19955	0.130602	no	no	no	no
YDL023C::chr4_1	YDL023C	YDL023C	0.0171776	0.483295	0.506605	0.0923207	no	no	no	no
YDL026W::chr4_1	YDL026W	YDL026W	0.632543	-0.0280737	0.0478495	0.552679	no	no	no	no
YDL027C::chr4_1	YDL027C	YDL027C	-0.112502	-0.365229	0.644736	0.863111	no	no	no	no
YDL028C::chr4_1	YDL028C	MPS1	-0.615162	-0.13132	0.95956	0.665315	no	no	no	no
YDL029W::chr4_1	YDL029W	ARP2	0.124311	0.0473027	0.391127	0.467073	no	no	no	no
YDL030W::chr4_1	YDL030W	PRP9	-0.302221	0.297345	0.813242	0.213002	no	no	no	no
YDL031W::chr00_17a	YDL031W	DBP10	0.0675449	0.0866043	0.45178	0.422789	no	no	no	no
YDL033C::chr4_1	YDL033C	SLM3	0.432237	0.581964	0.131706	0.0539044	no	no	no	no
YDL034W::chr4_1	YDL034W	YDL034W	-0.0741132	0.211193	0.60495	0.291077	no	no	no	no
YDL035C::chr4_1	YDL035C	GPR1	0.533592	0.834411	0.081432	0.00994542	no	no	no	no
YDL036C::chr4_1	YDL036C	PUS9	0.18095	0.113961	0.333142	0.392497	no	no	no	no
YDL037C::chr4_1	YDL037C	BSC1	-0.0489895	-0.309407	0.578275	0.82514	no	no	no	no
YDL038C::chr4_1	YDL039C	PRM7	-0.349364	0.072656	0.845854	0.438424	no	no	no	no
YDL039C::chr4_1	YDL039C	PRM7	-0.183586	-0.0414017	0.714139	0.567676	no	no	no	no
YDL040C::chr4_1	YDL040C	NAT1	-1.08865	-0.627683	0.998818	0.967353	no	no	no	no
YDL041W::chr4_1	YDL041W	YDL041W	-0.312234	-0.178282	0.820504	0.712604	no	no	no	no
YDL043C::chr4_1	YDL043C	PRP11	0.243764	0.390007	0.273251	0.144474	no	no	no	no
YDL045W-A::chr4_1	YDL045W-A	MRP10	-0.0911085	0.112817	0.622727	0.393752	no	no	no	no
YDL046W::chr4_1	YDL046W	NPC2	0.22415	0.390248	0.291372	0.144318	no	no	no	no
YDL047W::chr4_1	YDL047W	SIT4	-0.0645616	-0.377938	0.594859	0.870902	no	no	no	no
YDL048C::chr4_1	YDL048C	STP4	0.0739495	0.0554262	0.444853	0.457868	no	no	no	no
YDL050C::chr4_1	YDL050C	YDL050C	-0.149856	0.374139	0.681996	0.155015	no	no	no	no
YDL051W::chr4_1	YDL051W	LHP1	-0.400498	-0.197003	0.876697	0.730531	no	no	no	no
YDL052C::chr4_1	YDL052C	SLC1	-0.273263	0.0649901	0.791239	0.447059	no	no	no	no
YDL053C::chr4_1	YDL053C	PBP4	-0.307044	-0.127211	0.816763	0.661036	no	no	no	no
YDL055C::chr4_1	YDL055C	PSA1	-0.424093	-0.499493	0.889363	0.930227	no	no	no	no
YDL056W::chr4_1	YDL056W	MBP1	0.411864	0.490652	0.143969	0.0888953	no	no	no	no
YDL058W::chr00_17a	YDL058W	USO1	0.279568	0.198225	0.241679	0.303892	no	no	no	no
YDL059C::chr4_1	YDL059C	RAD59	-0.0082221	0.200593	0.534271	0.301533	no	no	no	no
YDL060W::chr4_1	YDL060W	TSR1	-0.748202	-0.695734	0.982544	0.979195	no	no	no	no
YDL061C::chr4_1	YDL061C	RPS29B	-0.194962	0.361523	0.72462	0.163751	no	no	no	no
YDL062W::chr4_1	YDL062W	YDL062W	-0.148919	-0.38245	0.681081	0.873592	no	no	no	no
YDL063C::chr4_1	YDL063C	YDL063C	-0.334076	-0.407461	0.835718	0.887797	no	no	no	no
YDL064W::chr4_1	YDL064W	UBC9	-0.17056	-0.268293	0.70191	0.793272	no	no	no	no
YDL065C::chr4_1	YDL065C	PEX19	-0.269377	-0.501511	0.788174	0.930995	no	no	no	no
YDL066W::chr4_1	YDL066W	IDP1	-0.0186014	0.242439	0.545536	0.261284	no	no	no	no
YDL067C::chr4_1	YDL067C	COX9	-0.0585978	-0.0587245	0.588526	0.58702	no	no	no	no
YDL068W::chr4_1	YDL068W	YDL068W	-0.325392	-0.126719	0.829772	0.660522	no	no	no	no
YDL069C::chr4_1	YDL069C	CBS1	-0.0762455	0.0844918	0.607193	0.425149	no	no	no	no
YDL070W::chr4_1	YDL070W	BDF2	0.272349	-0.0123825	0.247881	0.534928	no	no	no	no
YDL071C::chr4_1	YDL071C	YDL071C	-0.0221744	0.116024	0.549406	0.390236	no	no	no	no
YDL072C::chr4_1	YDL072C	YET3	-0.287753	0.0635979	0.802434	0.44863	no	no	no	no
YDL073W::chr4_1	YDL073W	YDL073W	0.176159	0.216196	0.337917	0.286202	no	no	no	no
YDL074C::chr4_1	YDL074C	BRE1	-0.44397	-0.148967	0.899288	0.68345	no	no	no	no
YDL075W::chr4_1	YDL075W	RPL31A	-0.0453035	-0.381591	0.574328	0.873083	no	no	no	no
YDL076C::chr4_1	YDL076C	RXT3	0.221805	0.443396	0.293576	0.112611	no	no	no	no
YDL078C::chr4_1	YDL078C	MDH3	0.109985	0.0165818	0.406247	0.502004	no	no	no	no
YDL079C::chr4_1	YDL079C	MRK1	0.0648947	0.304381	0.454651	0.207215	no	no	no	no
YDL080C::chr4_1	YDL080C	THI3	-0.0745229	-0.0376815	0.605381	0.563499	no	no	no	no
YDL081C::chr4_1	YDL081C	RPP1A	-0.0627775	0.167991	0.592967	0.334698	no	no	no	no
YDL082W::chr4_1	YDL082W	RPL13A	-0.314472	0.1189	0.822103	0.387091	no	no	no	no
YDL085W::chr4_1	YDL085W	NDE2	0.0106287	-0.0730977	0.513747	0.602914	no	no	no	no
YDL086W::chr4_1	YDL086W	YDL086W	0.136862	0.039787	0.378014	0.475606	no	no	no	no
YDL087C::chr4_1	YDL087C	LUC7	-1.63405	-1.12403	0.999997	0.999442	no	no	no	no
YDL089W::chr4_1	YDL089W	NUR1	-0.711097	-0.37353	0.977674	0.868235	no	no	no	no
YDL090C::chr4_1	YDL090C	RAM1	-0.20744	0.154812	0.735896	0.3485	no	no	no	no
YDL091C::chr4_1	YDL091C	UBX3	0.481591	0.387109	0.105046	0.146363	no	no	no	no
YDL093W::chr4_1	YDL093W	PMT5	-0.0880045	0.128118	0.619498	0.377061	no	no	no	no
YDL095W::chr4_1	YDL095W	PMT1	-0.34107	-0.0462545	0.840408	0.573114	no	no	no	no
YDL096C::chr4_2	YDL096C	OPI6	-0.0175419	-0.0735054	0.544388	0.603362	no	no	no	no
YDL097C::chr4_2	YDL097C	RPN6	0.224192	-0.138709	0.291333	0.672959	no	no	no	no
YDL098C::chr4_2	YDL098C	SNU23	-0.837544	-0.407521	0.990706	0.88783	no	no	no	no
YDL099W::chr4_2	YDL099W	BUG1	0.491496	0.341066	0.100202	0.17858	no	no	no	no
YDL100C::chr4_2	YDL100C	GET3	0.240572	0.270277	0.276162	0.236126	no	no	no	no
YDL101C::chr4_2	YDL101C	DUN1	-0.0928754	0.19995	0.624561	0.302172	no	no	no	no
YDL102W::chr4_2	YDL102W	POL3	0.575308	0.359218	0.0655766	0.16538	no	no	no	no
YDL103C::chr4_2	YDL103C	QRI1	-0.284277	-0.051334	0.799782	0.57879	no	no	no	no
YDL104C::chr4_2	YDL104C	QRI7	-0.325579	0.163889	0.829902	0.338971	no	no	no	no
YDL105W::chr4_2	YDL105W	NSE4	-0.314001	-0.240751	0.821767	0.77012	no	no	no	no
YDL106C::chr4_2	YDL106C	PHO2	-0.698162	-0.486653	0.975727	0.925186	no	no	no	no
YDL107W::chr4_2	YDL107W	MSS2	0.062668	0.461678	0.457066	0.10295	no	no	no	no
YDL108W::chr4_2	YDL108W	KIN28	0.0630319	-0.132213	0.456671	0.666244	no	no	no	no
YDL109C::chr4_2	YDL109C	YDL109C	-0.145101	-0.478494	0.677345	0.921842	no	no	no	no
YDL110C::chr4_2	YDL110C	TMA17	-0.420524	-0.31387	0.88751	0.828401	no	no	no	no
YDL111C::chr4_2	YDL111C	RRP42	-0.906058	-0.634142	0.994473	0.968675	no	no	no	no
YDL112W::chr4_2	YDL112W	TRM3	-0.167617	0.420078	0.699114	0.12585	no	no	no	no
YDL113C::chr4_2	YDL113C	ATG20	-0.249788	-0.453666	0.772329	0.910966	no	no	no	no
YDL114W::chr4_2	YDL114W	YDL114W	0.448759	0.340376	0.122305	0.179094	no	no	no	no
YDL115C::chr4_2	YDL115C	IWR1	-0.761423	-0.676017	0.984045	0.976212	no	no	no	no
YDL116W::chr4_2	YDL116W	NUP84	0.212969	-0.0954561	0.301948	0.627292	no	no	no	no
YDL117W::chr4_2	YDL117W	CYK3	0.166562	0.0183423	0.347561	0.5	no	no	no	no
YDL118W::chr4_2	YDL118W	YDL118W	-0.281143	-0.0595404	0.797373	0.587927	no	no	no	no
YDL119C::chr4_2	YDL119C	YDL119C	0.113816	-0.0411421	0.402188	0.567385	no	no	no	no
YDL120W::chr4_2	YDL120W	YFH1	0.198618	-0.00127009	0.315768	0.522312	no	no	no	no
YDL121C::chr4_2	YDL121C	YDL121C	-0.0909863	0.145386	0.6226	0.358497	no	no	no	no
YDL122W::chr4_2	YDL122W	UBP1	0.197785	-0.0360601	0.316578	0.561676	no	no	no	no
YDL123W::chr4_2	YDL123W	SNA4	-0.0459587	0.61366	0.57503	0.0447014	no	no	no	no
YDL124W::chr4_2	YDL124W	YDL124W	-0.104576	-0.269528	0.636634	0.794276	no	no	no	no
YDL125C::chr4_2	YDL125C	HNT1	0.0561357	0.419907	0.464157	0.125951	no	no	no	no
YDL126C::chr4_2	YDL126C	CDC48	-0.382375	-0.430761	0.866302	0.89997	no	no	no	no
YDL127W::chr4_2	YDL127W	PCL2	0.131567	0.13224	0.38353	0.372602	no	no	no	no
YDL128W::chr4_2	YDL128W	VCX1	-0.484522	-0.289494	0.91749	0.810114	no	no	no	no
YDL129W::chr4_2	YDL129W	YDL129W	0.142363	-0.100146	0.372309	0.632345	no	no	no	no
YDL130W-A::chr00_2	YDL130W-A	STF1	-0.523174	-0.786993	0.932422	0.989213	no	no	no	no
YDL130W::chr4_2	YDL130W	RPP1B	-0.41583	-0.0554338	0.885038	0.58336	no	no	no	no
YDL131W::chr4_2	YDL131W	LYS21	0.315775	0.515097	0.21188	0.0781925	no	no	no	no
YDL132W::chr4_2	YDL132W	CDC53	0.125026	0.0972889	0.390377	0.410893	no	no	no	no
YDL133W::chr4_2	YDL133W	SRF1	-0.278766	-0.373694	0.795534	0.868335	no	no	no	no
YDL134C-A::chr4_2	YDL133C-A	RPL41B	-0.0240508	0.230659	0.551436	0.27233	no	no	no	no
YDL134C::chr4_2	YDL134C	PPH21	0.128635	-0.138862	0.386595	0.673116	no	no	no	no
YDL135C::chr4_2	YDL135C	RDI1	0.277121	0.406981	0.243772	0.133745	no	no	no	no
YDL136W::chr4_2	YDL136W	RPL35B	0.0472343	0.122977	0.473837	0.382645	no	no	no	no
YDL137W::chr4_2	YDL137W	ARF2	-0.215116	-0.382162	0.742713	0.873422	no	no	no	no
YDL138W::chr4_2	YDL138W	RGT2	0.0651865	-0.0853277	0.454335	0.616305	no	no	no	no
YDL139C::chr4_2	YDL139C	SCM3	0.364486	0.239608	0.175382	0.263918	no	no	no	no
YDL140C::chr4_2	YDL140C	RPO21	-0.0131501	-0.313896	0.539623	0.82842	no	no	no	no
YDL141W::chr4_2	YDL141W	BPL1	-0.14116	-0.117618	0.673468	0.650962	no	no	no	no
YDL142C::chr4_2	YDL142C	CRD1	0.031685	-0.0834276	0.490781	0.614233	no	no	no	no
YDL143W::chr4_2	YDL143W	CCT4	0.616476	1.40539	0.0523866	3.78687e-05	no	no	no	yes
YDL144C::chr4_2	YDL144C	YDL144C	-1.12478	0.137318	0.999153	0.367132	no	no	no	no
YDL146W::chr4_2	YDL146W	LDB17	-0.0860153	-0.377343	0.617425	0.870544	no	no	no	no
YDL147W::chr4_2	YDL147W	RPN5	-0.195993	-0.211988	0.725561	0.744466	no	no	no	no
YDL148C::chr4_2	YDL148C	NOP14	0.538319	0.418421	0.0795021	0.126831	no	no	no	no
YDL149W::chr4_2	YDL149W	ATG9	-0.00921347	0.616254	0.535348	0.0440082	no	no	no	no
YDL150W::chr4_2	YDL150W	RPC53	1.09939	1.01152	0.00162737	0.00230044	no	no	no	no
YDL151C::chr4_2	YDL151C	BUD30	-0.135876	0.534935	0.668241	0.0702493	no	no	no	no
YDL152W::chr4_2	YDL152W	YDL152W	0.0941228	0.683217	0.423151	0.0289131	no	no	no	no
YDL153C::chr4_2	YDL153C	SAS10	0.305513	-0.333539	0.2201	0.842307	no	no	no	no
YDL154W::chr4_2	YDL154W	MSH5	-0.185724	-0.202172	0.716123	0.735381	no	no	no	no
YDL155W::chr4_2	YDL155W	CLB3	0.419036	0.000251519	0.139567	0.520583	no	no	no	no
YDL156W::chr4_2	YDL156W	CMR1	-0.252464	-0.284902	0.774532	0.80654	no	no	no	no
YDL157C::chr4_2	YDL157C	YDL157C	-0.253798	-0.284667	0.775626	0.806355	no	no	no	no
YDL158C::chr4_2	YDL158C	YDL158C	0.244385	0.282351	0.272686	0.225645	no	no	no	no
YDL159W::chr4_2	YDL159W	STE7	-0.378966	-0.739628	0.864281	0.984715	no	no	no	no
YDL160C::chr4_2	YDL160C	DHH1	0.298897	0.476511	0.225495	0.0955653	no	no	no	no
YDL161W::chr4_2	YDL161W	ENT1	-0.629464	-0.305727	0.962846	0.822421	no	no	no	no
YDL162C::chr4_2	YDL162C	YDL162C	0.00668632	0.14346	0.518044	0.360552	no	no	no	no
YDL163W::chr4_2	YDL163W	YDL163W	0.33596	0.697168	0.196246	0.0263836	no	no	no	no
YDL164C::chr4_2	YDL164C	CDC9	-0.0339098	0.418461	0.562082	0.126807	no	no	no	no
YDL165W::chr4_2	YDL165W	CDC36	-0.12316	-0.0338524	0.655529	0.559192	no	no	no	no
YDL166C::chr4_2	YDL166C	FAP7	0.213485	0.00592578	0.301456	0.51413	no	no	no	no
YDL167C::chr4_2	YDL167C	NRP1	0.163294	0.0601625	0.350868	0.452511	no	no	no	no
YDL169C::chr4_2	YDL169C	UGX2	-0.0576689	-0.179871	0.587538	0.714147	no	no	no	no
YDL170W::chr4_2	YDL170W	UGA3	0.291943	-0.248728	0.231246	0.776971	no	no	no	no
YDL172C::chr4_2	YDL172C	YDL172C	-0.15929	0.422148	0.69114	0.124633	no	no	no	no
YDL173W::chr4_2	YDL173W	PAR32	0.461918	0.138145	0.115163	0.366244	no	no	no	no
YDL174C::chr4_2	YDL174C	DLD1	-0.697236	-0.399924	0.975582	0.883643	no	no	no	no
YDL176W::chr4_2	YDL176W	YDL176W	0.125023	0.00441996	0.39038	0.515843	no	no	no	no
YDL177C::chr4_2	YDL177C	YDL177C	-0.672308	-0.558903	0.971405	0.95022	no	no	no	no
YDL178W::chr4_2	YDL178W	DLD2	-0.455807	-0.256898	0.90488	0.783865	no	no	no	no
YDL179W::chr4_2	YDL179W	PCL9	0.0574378	-0.164876	0.462742	0.699428	no	no	no	no
YDL180W::chr4_2	YDL180W	YDL180W	-0.037638	-0.120054	0.566096	0.653531	no	no	no	no
YDL181W::chr4_2	YDL181W	INH1	0.328128	0.27883	0.202227	0.228674	no	no	no	no
YDL182W::chr4_2	YDL182W	LYS20	0.101749	-0.0142271	0.415004	0.537019	no	no	no	no
YDL184C::chr4_2	YDL184C	RPL41A	0.295501	0.339199	0.228294	0.179973	no	no	no	no
YDL185W::chr4_2	YDL185W	VMA1	0.286225	0.127608	0.236035	0.377613	no	no	no	no
YDL186W::chr4_2	YDL186W	YDL186W	0.315574	0.202333	0.21204	0.299806	no	no	no	no
YDL187C::chr4_2	YDL187C	YDL187C	0.512059	0.595228	0.0906726	0.0498854	no	no	no	no
YDL190C::chr4_2	YDL190C	UFD2	-0.436396	-0.721687	0.895585	0.982633	no	no	no	no
YDL191W::chr4_3	YDL191W	RPL35A	0.891015	0.738686	0.00882628	0.019926	no	no	no	no
YDL193W::chr4_3	YDL193W	NUS1	0.597788	0.778629	0.0580866	0.0150321	no	yes	no	yes
YDL194W::chr00_16b	YDL194W	SNF3	-0.267352	0.147524	0.786567	0.35622	no	no	no	no
YDL195W::chr4_3	YDL195W	SEC31	-0.097066	-0.225395	0.6289	0.756607	no	no	no	no
YDL196W::chr4_3	YDL196W	YDL196W	0.122063	0.00969458	0.393489	0.509842	no	no	no	no
YDL197C::chr4_3	YDL197C	ASF2	0.283279	0.294766	0.238524	0.215147	no	no	no	no
YDL200C::chr4_3	YDL200C	MGT1	-0.493522	-0.294841	0.921172	0.814224	no	no	no	no
YDL201W::chr4_3	YDL201W	TRM8	-0.0781789	0.190853	0.609224	0.311287	no	no	no	no
YDL202W::chr4_3	YDL202W	MRPL11	-0.172611	-0.583469	0.703851	0.957018	no	no	no	no
YDL203C::chr4_3	YDL203C	ACK1	-0.150024	-0.0760869	0.68216	0.606199	no	no	no	no
YDL204W::chr4_3	YDL204W	RTN2	-0.499092	-0.594687	0.923386	0.959862	no	no	no	no
YDL205C::chr4_3	YDL205C	HEM3	-0.522506	0.370919	0.932183	0.157215	no	no	no	no
YDL206W::chr4_3	YDL206W	YDL206W	-0.148539	0.199555	0.680711	0.302566	no	no	no	no
YDL207W::chr4_3	YDL207W	GLE1	-0.745416	-0.805894	0.982213	0.990656	no	no	no	no
YDL208W::chr4_3	YDL208W	NHP2	0.18326	0.0587153	0.330849	0.454147	no	no	no	no
YDL209C::chr4_3	YDL209C	CWC2	0.570499	0.59629	0.0672718	0.0495742	no	no	no	no
YDL210W::chr4_3	YDL210W	UGA4	-0.585627	-0.0587634	0.952028	0.587063	no	no	no	no
YDL211C::chr4_3	YDL211C	YDL211C	-0.0684751	-0.395564	0.599001	0.88119	no	no	no	no
YDL212W::chr4_3	YDL212W	SHR3	-0.136407	-0.424003	0.668768	0.896543	no	no	no	no
YDL214C::chr4_3	YDL214C	PRR2	-0.297153	-0.097733	0.809499	0.629748	no	no	no	no
YDL215C::chr4_3	YDL215C	GDH2	-0.154204	-0.341628	0.686225	0.847805	no	no	no	no
YDL216C::chr4_3	YDL216C	RRI1	-0.0511954	0.118589	0.580634	0.38743	no	no	no	no
YDL217C::chr4_3	YDL217C	TIM22	-0.135119	0.154812	0.66749	0.3485	no	no	no	no
YDL218W::chr4_3	YDL218W	YDL218W	0.256608	0.158104	0.261694	0.345033	no	no	no	no
YDL219W::chr4_3	YDL219W	DTD1	-0.296478	-0.235015	0.808997	0.765123	no	no	no	no
YDL220C::chr4_3	YDL220C	CDC13	-1.21912	-0.65771	0.999659	0.973129	no	no	no	no
YDL221W::chr4_3	YDL221W	YDL221W	-0.229283	0.134318	0.755051	0.37036	no	no	no	no
YDL222C::chr4_3	YDL222C	FMP45	0.100136	-0.0647698	0.416724	0.593724	no	no	no	no
YDL224C::chr4_3	YDL224C	WHI4	0.197481	0.385045	0.316875	0.147718	no	no	no	no
YDL225W::chr4_3	YDL225W	SHS1	-0.350931	-0.202031	0.84687	0.735249	no	no	no	no
YDL226C::chr4_3	YDL226C	GCS1	0.117218	0.123838	0.398594	0.381708	no	no	no	no
YDL227C::chr4_3	YDL227C	HO	0.357144	0.348873	0.180613	0.172823	no	no	no	no
YDL229W::chr4_3	YDL229W	SSB1	0.311985	0.0360431	0.214895	0.47986	no	no	no	no
YDL231C::chr4_3	YDL231C	BRE4	0.840219	0.84492	0.0127438	0.00917737	no	no	no	no
YDL232W::chr4_3	YDL232W	OST4	0.349533	0.435399	0.186137	0.117034	no	no	no	no
YDL233W::chr4_3	YDL233W	YDL233W	0.170042	-0.0284447	0.344052	0.553098	no	no	no	no
YDL234C::chr4_3	YDL234C	GYP7	-0.447037	-0.447392	0.900759	0.908048	no	no	no	no
YDL235C::chr4_3	YDL235C	YPD1	-0.173901	-0.12784	0.705069	0.661692	no	no	no	no
YDL236W::chr4_3	YDL236W	PHO13	0.0880323	0.197348	0.429682	0.304767	no	no	no	no
YDL237W::chr4_3	YDL237W	AIM6	-0.116043	-0.362067	0.648336	0.861124	no	no	no	no
YDL238C::chr4_3	YDL238C	GUD1	-0.193062	0.0641659	0.722883	0.447989	no	no	no	no
YDL239C::chr4_3	YDL239C	ADY3	0.140421	0.343303	0.374319	0.176918	no	no	no	no
YDL240W::chr4_3	YDL240W	LRG1	0.404405	0.78049	0.148645	0.0148318	no	no	no	no
YDL242W::chr4_3	YDL242W	YDL242W	-0.578088	-0.382298	0.949936	0.873502	no	no	no	no
YDR001C::chr4_3	YDR001C	NTH1	0.262604	0.95908	0.256386	0.00363623	no	no	no	no
YDR002W::chr4_3	YDR002W	YRB1	-0.281267	2.03239	0.797468	4.55681e-09	no	yes	no	yes
YDR003W::chr4_3	YDR003W	RCR2	0.275333	0.337515	0.245307	0.181237	no	no	no	no
YDR004W::chr4_3	YDR004W	RAD57	-0.310759	-0.261975	0.819445	0.788086	no	no	no	no
YDR005C::chr4_3	YDR005C	MAF1	0.0183165	0.0712854	0.505363	0.439965	no	no	no	no
YDR006C::chr4_3	YDR006C	SOK1	-0.595702	-0.341134	0.954714	0.847473	no	no	no	no
YDR007W::chr00_16b	YDR007W	TRP1	-0.236189	-0.236038	0.760948	0.766018	no	no	no	no
YDR008C::chr4_3	YDR008C	YDR008C	0.336304	0.150746	0.195986	0.3528	no	no	no	no
YDR009W::chr4_3	YDR009W	GAL3	0.250435	-0.0863018	0.267217	0.617366	no	no	no	no
YDR010C::chr4_3	YDR010C	YDR010C	0.232216	0.0119329	0.283853	0.507295	no	no	no	no
YDR011W::chr4_3	YDR011W	SNQ2	-0.232145	-0.317913	0.757504	0.831322	no	no	no	no
YDR013W::chr4_3	YDR013W	PSF1	-0.14903	-0.156572	0.68119	0.691132	no	no	no	no
YDR014W::chr4_3	YDR014W	RAD61	0.0934451	0.308465	0.423877	0.203899	no	no	no	no
YDR015C::chr4_3	YDR015C	YDR015C	-0.28295	-0.0118189	0.798764	0.534289	no	no	no	no
YDR016C::chr4_3	YDR016C	DAD1	-0.0176111	0.470773	0.544463	0.098374	no	no	no	no
YDR017C::chr4_3	YDR017C	KCS1	-0.371663	-0.390972	0.859881	0.878567	no	no	no	no
YDR019C::chr4_3	YDR019C	GCV1	-0.441517	-0.853417	0.898099	0.993564	no	no	no	no
YDR020C::chr4_3	YDR020C	DAS2	-0.277809	-0.174455	0.794791	0.70887	no	no	no	no
YDR021W::chr4_3	YDR021W	FAL1	0.15796	-0.146942	0.35629	0.681389	no	no	no	no
YDR022C::chr4_3	YDR022C	CIS1	-0.508545	0.101662	0.927037	0.406047	no	no	no	no
YDR023W::chr4_3	YDR023W	SES1	0.25319	0.592898	0.264745	0.0505737	no	no	no	no
YDR024W::chr4_3	YDR024W	FYV1	0.0417739	0.00537666	0.479784	0.514755	no	no	no	no
YDR025W::chr4_3	YDR025W	RPS11A	0.175216	0.303039	0.33886	0.208312	no	no	no	no
YDR026C::chr4_3	YDR026C	NSI1	-0.373726	-0.513634	0.861134	0.935472	no	no	no	no
YDR028C::chr4_3	YDR028C	REG1	0.0449991	-0.180516	0.476271	0.714773	no	no	no	no
YDR029W::chr4_3	YDR029W	YDR029W	0.332866	-0.0585898	0.198596	0.586871	no	no	no	no
YDR030C::chr4_3	YDR030C	RAD28	-0.504508	-0.26452	0.925495	0.790184	no	no	no	no
YDR031W::chr4_3	YDR031W	MIC14	0.22059	0.189138	0.294721	0.313018	no	no	no	no
YDR032C::chr4_3	YDR032C	PST2	-0.0120217	0.0600791	0.538398	0.452605	no	no	no	no
YDR033W::chr4_3	YDR033W	MRH1	0.430489	1.13347	0.132729	0.000732161	no	no	no	yes
YDR035W::chr4_3	YDR035W	ARO3	0.525764	0.463413	0.0847052	0.102065	no	no	no	no
YDR036C::chr4_3	YDR036C	EHD3	0.598091	0.263417	0.0579906	0.2422	no	no	no	no
YDR037W::chr4_3	YDR037W	KRS1	-0.137625	0.160626	0.669974	0.342385	no	no	no	no
YDR041W::chr00_16b	YDR041W	RSM10	-0.0724242	-0.0169287	0.60317	0.54008	no	no	no	no
YDR042C::chr4_3	YDR042C	YDR042C	-0.126726	-0.10404	0.659112	0.636523	no	no	no	no
YDR043C::chr4_3	YDR043C	NRG1	-0.221625	-0.196479	0.748421	0.730038	no	no	no	no
YDR046C::chr4_3	YDR046C	BAP3	0.37558	0.49894	0.167663	0.0851507	no	no	no	no
YDR047W::chr4_3	YDR047W	HEM12	0.16875	0.145107	0.345354	0.358794	no	no	no	no
YDR048C::chr00_16b	YDR048C	YDR048C	-0.243213	-0.267396	0.766864	0.79254	no	no	no	no
YDR049W::chr4_4	YDR049W	VMS1	0.168698	0.489428	0.345406	0.0894582	no	no	no	no
YDR050C::chr00_11	YDR050C	TPI1	-0.193683	-0.148352	0.723451	0.682824	no	no	no	no
YDR050C::chr4_4	YDR050C	TPI1	0.180189	0.105568	0.333898	0.40173	no	no	no	no
YDR051C::chr4_4	YDR051C	DET1	0.30425	0.331344	0.221124	0.185915	no	no	no	no
YDR052C::chr4_4	YDR052C	DBF4	-0.0442518	0.0177691	0.5732	0.500653	no	no	no	no
YDR053W::chr4_4	YDR053W	YDR053W	0.0998276	-0.318796	0.417054	0.831955	no	no	no	no
YDR054C::chr4_4	YDR054C	CDC34	0.05179	-0.316833	0.46888	0.830545	no	no	no	no
YDR056C::chr4_4	YDR056C	YDR056C	-0.0233085	0.269325	0.550633	0.236964	no	no	no	no
YDR057W::chr4_4	YDR057W	YOS9	0.367546	0.127277	0.173231	0.377972	no	no	no	no
YDR059C::chr4_4	YDR059C	UBC5	0.288099	0.122911	0.23446	0.382717	no	no	no	no
YDR060W::chr4_4	YDR060W	MAK21	0.148267	0.705961	0.366217	0.0248865	no	no	no	no
YDR061W::chr4_4	YDR061W	YDR061W	0.189654	0.0127169	0.324535	0.506403	no	no	no	no
YDR062W::chr4_4	YDR062W	LCB2	0.253821	0.0517008	0.264181	0.462087	no	no	no	no
YDR063W::chr4_4	YDR063W	AIM7	0.0575378	-0.280848	0.462634	0.80335	no	no	no	no
YDR064W::chr4_4	YDR064W	RPS13	0.693208	0.395091	0.0334793	0.141202	no	no	no	no
YDR065W::chr4_4	YDR065W	RRG1	0.0674173	-0.127615	0.451919	0.661457	no	no	no	no
YDR067C::chr4_4	YDR067C	OCA6	-0.559704	-0.609245	0.944528	0.963323	no	no	no	no
YDR068W::chr4_4	YDR068W	DOS2	0.206578	-0.0673777	0.30807	0.596608	no	no	no	no
YDR069C::chr4_4	YDR069C	DOA4	0.824569	0.63102	0.0142208	0.0402244	no	no	no	no
YDR070C::chr4_4	YDR070C	FMP16	0.371443	0.0905795	0.170515	0.418354	no	no	no	no
YDR072C::chr4_4	YDR072C	IPT1	0.142678	-0.112169	0.371983	0.645192	no	no	no	no
YDR073W::chr4_4	YDR073W	SNF11	0.305915	0.360031	0.219774	0.164804	no	no	no	no
YDR074W::chr00_11	YDR074W	TPS2	0.592406	0.296926	0.0598158	0.21335	no	no	no	no
YDR075W::chr4_4	YDR075W	PPH3	-0.371052	-0.277532	0.859509	0.800717	no	no	no	no
YDR076W::chr4_4	YDR076W	RAD55	-0.470524	-0.505707	0.91151	0.932571	no	no	no	no
YDR077W::chr4_4	YDR077W	SED1	0.503253	0.476642	0.094668	0.0955017	no	no	no	no
YDR078C::chr4_4	YDR078C	SHU2	0.634415	0.605851	0.0473421	0.0468423	no	no	no	no
YDR079W::chr4_4	YDR079W	PET100	-0.216542	-0.265965	0.74397	0.79137	no	no	no	no
YDR080W::chr4_4	YDR080W	VPS41	0.306262	0.339783	0.219494	0.179537	no	no	no	no
YDR081C::chr4_4	YDR081C	PDC2	-0.290009	0.315867	0.804144	0.19797	no	no	no	no
YDR083W::chr4_4	YDR083W	RRP8	0.17797	-0.224096	0.336109	0.755444	no	no	no	no
YDR084C::chr4_4	YDR084C	TVP23	0.0962659	0.255716	0.420858	0.249117	no	no	no	no
YDR085C::chr4_4	YDR085C	AFR1	0.725309	0.132169	0.0274462	0.372678	no	no	no	no
YDR087C::chr4_4	YDR087C	RRP1	-0.324798	0.263244	0.829361	0.242353	no	no	no	no
YDR088C::chr4_4	YDR088C	SLU7	-0.104354	-0.221907	0.636406	0.753479	no	no	no	no
YDR091C::chr4_4	YDR091C	RLI1	-0.320736	-0.173984	0.826528	0.708409	no	no	no	no
YDR092W::chr4_4	YDR092W	UBC13	-0.480605	-0.396914	0.915848	0.881953	no	no	no	no
YDR093W::chr4_4	YDR093W	DNF2	-0.313298	-0.000512574	0.821265	0.521451	no	no	no	no
YDR094W::chr4_4	YDR094W	YDR094W	0.00504487	-0.0956733	0.519833	0.627526	no	no	no	no
YDR095C::chr4_4	YDR095C	YDR095C	0.522299	0.583523	0.0861856	0.0534191	no	no	no	no
YDR096W::chr4_4	YDR096W	GIS1	0.112226	0.526884	0.403872	0.0733945	no	no	no	no
YDR097C::chr4_4	YDR097C	MSH6	-0.214576	-0.138255	0.742237	0.672491	no	no	no	no
YDR098C::chr4_4	YDR098C	GRX3	-0.145549	-0.0451817	0.677784	0.571913	no	no	no	no
YDR099W::chr4_4	YDR099W	BMH2	0.266936	0.617761	0.252587	0.0436092	no	no	no	no
YDR101C::chr4_4	YDR101C	ARX1	0.559457	0.724991	0.0712931	0.0218893	no	no	no	no
YDR102C::chr4_4	YDR102C	YDR102C	0.199341	0.309868	0.315066	0.202767	no	no	no	no
YDR103W::chr4_4	YDR103W	STE5	-0.585536	-0.46155	0.952003	0.914535	no	no	no	no
YDR105C::chr4_4	YDR105C	TMS1	-0.222296	0.142192	0.749006	0.361906	no	no	no	no
YDR107C::chr4_4	YDR107C	TMN2	0.100909	0.0402428	0.415899	0.475088	no	no	no	no
YDR108W::chr4_4	YDR108W	TRS85	0.18245	0.0177264	0.331652	0.500701	no	no	no	no
YDR109C::chr4_4	YDR109C	YDR109C	-0.943321	-0.487096	0.99589	0.925365	no	no	no	no
YDR110W::chr4_4	YDR110W	FOB1	0.336972	0.101729	0.195481	0.405972	no	no	no	no
YDR112W::chr4_4	YDR112W	IRC2	0.823955	0.41611	0.0142816	0.128207	no	no	no	no
YDR113C::chr4_4	YDR113C	PDS1	0.111061	0.330945	0.405106	0.186219	no	no	no	no
YDR114C::chr4_4	YDR114C	YDR114C	0.0150775	-0.135433	0.508896	0.669579	no	no	no	no
YDR115W::chr4_4	YDR115W	YDR115W	-0.357344	-0.579618	0.850977	0.956005	no	no	no	no
YDR116C::chr4_4	YDR116C	MRPL1	0.0361406	0.0915935	0.485923	0.417224	no	no	no	no
YDR117C::chr4_4	YDR117C	TMA64	-0.249065	-0.387097	0.771732	0.876322	no	no	no	no
YDR118W::chr4_4	YDR118W	APC4	1.00997	0.782364	0.00348677	0.0146325	no	no	no	no
YDR120C::chr4_4	YDR120C	TRM1	0.50629	0.312825	0.0932755	0.200393	no	no	no	no
YDR121W::chr4_4	YDR121W	DPB4	-0.0724893	0.319922	0.603239	0.194767	no	no	no	no
YDR123C::chr4_4	YDR123C	INO2	0.569703	0.165574	0.0675559	0.337213	no	no	no	no
YDR124W::chr4_4	YDR124W	YDR124W	0.0403283	0.00342165	0.481359	0.516978	no	no	no	no
YDR125C::chr4_4	YDR125C	ECM18	-0.299667	-0.0486644	0.811361	0.575809	no	no	no	no
YDR127W::chr4_4	YDR127W	ARO1	0.341761	0.407707	0.191885	0.133299	no	no	no	no
YDR128W::chr4_4	YDR128W	MTC5	-0.0714004	-0.435993	0.602091	0.902565	no	no	no	no
YDR130C::chr4_4	YDR130C	FIN1	0.461998	0.387519	0.11512	0.146095	no	no	no	no
YDR132C::chr4_4	YDR132C	YDR132C	-0.733381	-0.432867	0.98072	0.90102	no	no	no	no
YDR133C::chr4_4	YDR133C	YDR133C	-0.0806697	0.266195	0.611836	0.23973	no	no	no	no
YDR134C::chr4_4	YDR134C	YDR134C	0.0387451	0.113793	0.483084	0.392681	no	no	no	no
YDR135C::chr4_4	YDR135C	YCF1	-0.110007	0.0519496	0.642193	0.461805	no	no	no	no
YDR136C::chr4_4	YDR136C	VPS61	0.100038	0.0175392	0.416829	0.500914	no	no	no	no
YDR137W::chr4_4	YDR137W	RGP1	-0.294372	-0.385602	0.807425	0.875448	no	no	no	no
YDR138W::chr4_4	YDR138W	HPR1	0.340636	-0.00256923	0.192726	0.523789	no	no	no	no
YDR139C::chr4_4	YDR139C	RUB1	-0.310032	-0.136707	0.818922	0.670895	no	no	no	no
YDR141C::chr4_4	YDR141C	DOP1	-0.141376	-0.170486	0.673681	0.704975	no	no	no	no
YDR142C::chr4_4	YDR142C	PEX7	0.0644338	0.118454	0.455151	0.387577	no	no	no	no
YDR143C::chr4_4	YDR143C	SAN1	-0.282563	-0.209978	0.798467	0.742619	no	no	no	no
YDR144C::chr4_4	YDR144C	MKC7	-0.515262	0.902617	0.929549	0.00581782	no	yes	no	yes
YDR146C::chr4_4	YDR146C	SWI5	-0.175512	0.0043233	0.706587	0.515953	no	no	no	no
YDR149C::chr4_5	YDR149C	YDR149C	0.291395	0.1514	0.231703	0.352106	no	no	no	no
YDR150W::chr4_5	YDR150W	NUM1	0.23541	-0.111634	0.2809	0.644624	no	no	no	no
YDR152W::chr4_5	YDR152W	GIR2	0.481198	0.216353	0.105241	0.28605	no	no	no	no
YDR158W::chr4_5	YDR158W	HOM2	0.432845	0.051677	0.131351	0.462114	no	no	no	no
YDR161W::chr4_5	YDR161W	YDR161W	0.193666	0.150946	0.320599	0.352588	yes	no	yes	no
YDR163W::chr4_5	YDR163W	CWC15	-0.328325	0.063082	0.831796	0.449213	no	yes	no	yes
YDR165W::chr4_5	YDR165W	TRM82	0.136256	0.0559854	0.378643	0.457235	no	no	no	no
YDR169C::chr4_5	YDR169C	STB3	-0.00127427	-0.0776706	0.526714	0.607936	no	no	no	no
YDR170C::chr4_5	YDR170C	SEC7	0.309879	0.338716	0.216581	0.180335	no	yes	no	yes
YDR173C::chr4_5	YDR173C	ARG82	-0.131433	-0.210683	0.663821	0.743268	no	no	no	no
YDR179C::chr4_5	YDR179C	CSN9	0.234693	-0.0455264	0.281562	0.572299	yes	no	yes	no
YDR198C::chr4_5	YDR198C	RKM2	0.526649	0.367284	0.0843302	0.159723	yes	no	yes	no
YDR202C::chr00_14	YDR202C	RAV2	0.308914	0.10078	0.217356	0.407022	no	no	no	no
YDR216W::chr4_5	YDR216W	ADR1	0.337672	-0.101156	0.194953	0.63343	no	no	no	no
YDR224C::chr4_5	YDR224C	HTB1	1.19161	0.721865	0.000699762	0.0223597	no	no	yes	no
YDR226W::chr4_5	YDR226W	ADK1	0.193666	0.0697495	0.320599	0.441694	yes	no	yes	no
YDR229W::chr4_5	YDR229W	IVY1	0.454725	0.42246	0.119029	0.12445	no	no	no	no
YDR231C::chr4_5	YDR231C	COX20	0.00102107	-0.0643009	0.524215	0.593205	yes	no	yes	no
YDR234W::chr4_5	YDR234W	LYS4	0.351207	0.123455	0.184913	0.382124	yes	no	yes	no
YDR239C::chr4_5	YDR239C	YDR239C	0.653098	0.226037	0.0425097	0.276727	yes	no	yes	no
YDR242W::chr00_17a	YDR242W	AMD2	0.0950445	-0.034751	0.422165	0.560204	no	no	no	no
YDR246W::chr4_6	YDR246W	TRS23	0.298305	0.0203615	0.225982	0.497702	no	no	no	no
YDR260C::chr4_6	YDR260C	SWM1	0.833094	1.15144	0.0133989	0.000612619	no	yes	no	yes
YDR289C::chr4_6	YDR289C	RTT103	-0.121648	0.0931393	0.654006	0.415504	no	yes	no	yes
YDR294C::chr4_6	YDR294C	DPL1	0.294443	0.41209	0.229169	0.130626	no	yes	no	yes
YDR295C::chr4_6	YDR295C	HDA2	-0.33092	-0.703665	0.833573	0.980302	no	no	no	no
YDR326C::chr00_17a	YDR326C	YSP2	-0.0533676	-0.202031	0.582953	0.735249	no	no	no	no
YDR327W::chr4_6	YDR327W	YDR327W	-0.0404825	0.190287	0.569154	0.311858	no	no	no	no
YDR376W::chr4_7	YDR376W	ARH1	0.063082	0.0588357	0.456617	0.45401	yes	no	yes	no
YDR437W::chr4_8	YDR437W	GPI19	0.0913902	0.357336	0.426079	0.166719	no	no	no	no
YDR438W::chr4_8	YDR438W	THI74	0.0529872	0.272629	0.467579	0.234063	no	no	no	no
YDR439W::chr4_8	YDR439W	LRS4	0.574015	0.359903	0.066029	0.164894	no	no	no	no
YDR440W::chr4_8	YDR440W	DOT1	0.217077	0.17804	0.298043	0.324322	no	no	no	no
YDR443C::chr4_8	YDR443C	SSN2	0.209442	0.436057	0.305319	0.116666	no	no	no	no
YDR446W::chr4_8	YDR446W	ECM11	0.290693	0.185161	0.232288	0.317049	no	no	no	no
YDR447C::chr4_8	YDR447C	RPS17B	0.132341	0.321531	0.382722	0.193504	no	no	no	no
YDR449C::chr4_8	YDR449C	UTP6	0.155285	-0.0280507	0.35902	0.552653	no	no	no	no
YDR451C::chr4_8	YDR451C	YHP1	-0.267706	0.371177	0.786848	0.157039	no	no	no	no
YDR452W::chr4_8	YDR452W	PPN1	-0.281944	-0.272551	0.79799	0.796724	no	no	no	no
YDR453C::chr4_8	YDR453C	TSA2	0.0221021	0.00322395	0.501234	0.517203	no	no	no	no
YDR454C::chr4_8	YDR454C	GUK1	-0.366641	-0.0852305	0.856801	0.616199	no	no	no	no
YDR455C::chr4_8	YDR455C	YDR455C	-0.370566	-0.146865	0.859212	0.681311	no	no	no	no
YDR456W::chr4_8	YDR456W	NHX1	0.0514758	-0.251443	0.469222	0.779276	no	no	no	no
YDR457W::chr4_8	YDR457W	TOM1	0.207012	-0.129628	0.307651	0.663556	no	no	no	no
YDR458C::chr4_8	YDR458C	HEH2	0.014273	-0.427876	0.509773	0.898517	no	no	no	no
YDR459C::chr4_8	YDR459C	PFA5	-0.243671	-0.126057	0.767247	0.65983	no	no	no	no
YDR460W::chr4_8	YDR460W	TFB3	0.223127	-0.0607542	0.292333	0.589274	no	no	no	no
YDR462W::chr4_8	YDR462W	MRPL28	-0.058816	0.356882	0.588758	0.167043	no	no	no	no
YDR463W::chr4_8	YDR463W	STP1	0.0529309	0.0867734	0.46764	0.4226	no	no	no	no
YDR464W::chr4_8	YDR464W	SPP41	-0.477005	-0.220241	0.914318	0.751977	no	no	no	no
YDR466W::chr4_8	YDR466W	PKH3	0.209909	0.164228	0.304872	0.338617	no	no	no	no
YDR467C::chr4_8	YDR467C	YDR467C	-0.55039	-0.0877873	0.941617	0.618982	no	no	no	no
YDR468C::chr4_8	YDR468C	TLG1	-0.0333504	0.256429	0.561479	0.248472	no	no	no	no
YDR469W::chr4_8	YDR469W	SDC1	0.455544	0.550976	0.118584	0.0642923	no	no	no	no
YDR470C::chr4_8	YDR470C	UGO1	0.697614	0.59294	0.0325915	0.050561	no	no	no	no
YDR471W::chr4_8	YDR471W	RPL27B	-0.261767	-0.0682477	0.782096	0.597568	no	no	no	no
YDR472W::chr4_8	YDR472W	TRS31	-0.286847	0.397294	0.801745	0.139799	no	no	no	no
YDR473C::chr4_8	YDR473C	PRP3	-0.890527	-0.719178	0.993765	0.982323	no	no	no	no
YDR474C::chr4_8	YDR475C	JIP4	-0.610058	-0.461731	0.958332	0.914616	no	no	no	no
YDR475C::chr4_8	YDR475C	JIP4	-0.570383	-0.499407	0.947723	0.930194	no	no	no	no
YDR476C::chr4_8	YDR476C	YDR476C	0.403841	0.0734537	0.149003	0.437527	no	no	no	no
YDR477W::chr4_8	YDR477W	SNF1	0.047242	0.167824	0.473829	0.334872	no	no	no	no
YDR478W::chr4_8	YDR478W	SNM1	-0.814013	-0.76801	0.98897	0.987571	no	no	no	no
YDR479C::chr4_8	YDR479C	PEX29	-0.388915	-0.193271	0.870121	0.727003	no	no	no	no
YDR480W::chr4_8	YDR480W	DIG2	-0.313113	0.125472	0.821133	0.379931	no	no	no	no
YDR481C::chr4_8	YDR481C	PHO8	0.780471	0.373377	0.0191999	0.155534	no	no	no	no
YDR482C::chr4_8	YDR482C	CWC21	-0.28116	0.0761325	0.797386	0.434517	no	no	no	no
YDR483W::chr4_8	YDR483W	KRE2	0.042399	0.315105	0.479102	0.198576	no	no	no	no
YDR484W::chr4_8	YDR484W	VPS52	0.663041	0.635502	0.0401054	0.0391298	no	no	no	no
YDR485C::chr4_8	YDR485C	VPS72	-0.0823375	0.0982042	0.613582	0.409877	no	no	no	no
YDR486C::chr4_8	YDR486C	VPS60	-0.177918	0.0673506	0.708847	0.444397	no	no	no	no
YDR487C::chr4_8	YDR487C	RIB3	-0.974479	-0.407402	0.996815	0.887765	no	no	no	no
YDR488C::chr4_8	YDR488C	PAC11	0.280762	0.355456	0.240662	0.168062	no	no	no	no
YDR489W::chr4_8	YDR489W	SLD5	0.461432	0.364275	0.115421	0.161818	no	no	no	no
YDR491C::chr4_8	YDR491C	YDR491C	0.281058	0.147666	0.24041	0.35607	no	no	no	no
YDR492W::chr4_8	YDR492W	IZH1	-0.132596	0.0895279	0.66498	0.419526	no	no	no	no
YDR493W::chr00_17a	YDR493W	MZM1	0.0285413	-0.0271904	0.49421	0.551683	no	no	no	no
YDR494W::chr4_8	YDR494W	RSM28	-0.215426	0.215709	0.742986	0.286675	no	no	no	no
YDR495C::chr4_8	YDR495C	VPS3	0.176218	0.287757	0.337858	0.221038	no	no	no	no
YDR496C::chr4_8	YDR496C	PUF6	0.357044	0.39396	0.180685	0.141926	no	no	no	no
YDR497C::chr4_8	YDR497C	ITR1	0.363346	0.307953	0.176188	0.204313	no	no	no	no
YDR498C::chr00_17a	YDR498C	SEC20	-0.337091	0.323691	0.837751	0.191818	no	no	no	no
YDR500C::chr4_8	YDR500C	RPL37B	-0.33092	-0.301567	0.833573	0.819316	no	no	no	no
YDR502C::chr00_17a	YDR502C	SAM2	0.169265	0.250816	0.344835	0.253572	no	no	no	no
YDR503C::chr4_8	YDR503C	LPP1	-0.178978	0.0104415	0.709841	0.508992	no	no	no	no
YDR504C::chr4_8	YDR504C	SPG3	-0.142128	-0.16539	0.674422	0.699938	no	no	no	no
YDR505C::chr4_8	YDR505C	PSP1	-0.655161	-0.768134	0.9682	0.987583	no	no	no	no
YDR506C::chr00_17a	YDR506C	GMC1	0.276645	-0.00106023	0.24418	0.522074	no	no	no	no
YDR508C::chr4_8	YDR508C	GNP1	-0.197107	-0.117428	0.726576	0.650762	no	no	no	no
YDR509W::chr4_8	YDR509W	YDR509W	-0.290169	-0.135635	0.804265	0.669787	no	no	no	no
YDR510W::chr4_8	YDR510W	SMT3	0.108856	0.174429	0.407444	0.328035	no	no	no	no
YDR511W::chr4_8	YDR511W	ACN9	-0.538655	-0.134761	0.937781	0.668883	no	no	no	no
YDR512C::chr4_8	YDR512C	EMI1	0.120466	0.21456	0.39517	0.287792	no	no	no	no
YDR513W::chr4_8	YDR513W	GRX2	-0.889718	-0.499013	0.993726	0.930043	no	no	no	no
YDR514C::chr4_8	YDR514C	YDR514C	-0.0276543	-0.183612	0.555332	0.717765	no	no	no	no
YDR515W::chr00_17a	YDR515W	SLF1	0.52759	1.20973	0.083933	0.000337855	no	no	no	yes
YDR517W::chr4_8	YDR517W	GRH1	0.0179428	-0.102009	0.505771	0.634346	no	no	no	no
YDR518W::chr4_8	YDR518W	EUG1	-0.466595	-0.0197594	0.909774	0.543284	no	no	no	no
YDR519W::chr4_8	YDR519W	FPR2	-0.20424	-0.0538579	0.733027	0.581605	no	no	no	no
YDR520C::chr4_8	YDR520C	URC2	0.320605	0.380793	0.208074	0.150535	no	no	no	no
YDR521W::chr4_8	YDR521W	YDR521W	-0.167871	-0.271785	0.699356	0.796105	no	no	no	no
YDR522C::chr4_8	YDR522C	SPS2	-0.0720485	-0.489319	0.602774	0.926255	no	no	no	no
YDR523C::chr4_8	YDR523C	SPS1	-0.00680372	-0.00147954	0.532729	0.52255	no	no	no	no
YDR524C::chr4_8	YDR524C	AGE1	0.143342	-0.0526607	0.371297	0.58027	no	no	no	no
YDR525W::chr4_8	YDR525W	API2	0.0294277	0.208027	0.493243	0.294182	no	no	no	no
YDR526C::chr00_17a	YDR526C	YDR526C	-0.12011	0.286798	0.652453	0.221851	no	no	no	no
YDR527W::chr4_8	YDR527W	RBA50	0.161104	0.263366	0.353091	0.242245	no	no	no	no
YDR529C::chr4_8	YDR529C	QCR7	0.222191	0.019343	0.293213	0.498861	no	no	no	no
YDR530C::chr4_8	YDR530C	APA2	-1.57512	-1.11672	0.999994	0.999399	no	no	no	no
YDR531W::chr4_8	YDR531W	CAB1	0.161643	0.271801	0.352544	0.234789	no	no	no	no
YDR532C::chr4_8	YDR532C	KRE28	0.0740391	0.312098	0.444756	0.200976	no	no	no	no
YDR533C::chr4_8	YDR533C	HSP31	-0.12192	-0.035814	0.654279	0.561399	no	no	no	no
YDR534C::chr4_8	YDR534C	FIT1	-0.165111	-0.326089	0.696724	0.837129	no	no	no	no
YDR536W::chr00_2	YDR536W	STL1	0.144468	0.165652	0.370133	0.337132	no	yes	no	yes
YDR539W::chr00_2	YDR539W	FDC1	0.0398071	0.401618	0.481926	0.137074	no	no	no	no
YDR540C::chr00_2	YDR540C	IRC4	0.112995	0.281741	0.403057	0.226168	no	no	no	no
YDR541C::chr00_2	YDR541C	YDR541C	-0.227921	-0.402199	0.753878	0.884908	no	no	no	no
YEL001C::chr5_2	YEL001C	IRC22	-0.198579	-0.272166	0.727913	0.796412	no	no	no	no
YEL004W::chr5_2	YEL004W	YEA4	0.532728	0.390943	0.0817885	0.143868	no	no	no	no
YEL008W::chr5_2	YEL008W	YEL008W	0.112067	-0.0479654	0.40404	0.575027	no	no	no	no
YEL009C::chr5_2	YEL009C	GCN4	-1.09965	-0.768452	0.998931	0.987612	no	no	no	no
YEL014C::chr5_2	YEL014C	YEL014C	-0.406088	-0.359891	0.879786	0.859744	no	no	no	no
YEL015W::chr5_2	YEL015W	EDC3	-0.0163021	-0.0369717	0.543043	0.562701	no	no	no	no
YEL016C::chr5_2	YEL016C	NPP2	-0.0975397	0.213672	0.629389	0.288657	no	no	no	no
YEL017C-A::chr5_2	YEL017C-A	PMP2	0.00088396	0.116129	0.524364	0.390121	no	no	no	no
YEL017W::chr5_2	YEL017W	GTT3	-0.0373449	-0.226076	0.565781	0.757215	no	no	no	no
YEL018W::chr5_2	YEL018W	EAF5	-0.447458	-0.00704465	0.900959	0.528872	no	no	no	no
YEL019C::chr5_2	YEL019C	MMS21	-0.287499	-0.0775361	0.802241	0.607788	no	no	no	no
YEL020C::chr5_2	YEL020C	YEL020C	0.127799	0.0972484	0.38747	0.410937	no	no	no	no
YEL024W::chr5_2	YEL024W	RIP1	-0.417524	-0.485667	0.885935	0.924788	no	no	no	no
YEL025C::chr5_2	YEL025C	YEL025C	0.341364	0.36776	0.192182	0.159393	no	no	no	no
YEL026W::chr5_2	YEL026W	SNU13	-0.276939	-0.610836	0.794114	0.963687	no	no	no	no
YEL027W::chr5_2	YEL027W	VMA3	0.169966	-0.0841151	0.344129	0.614983	no	no	no	no
YEL028W::chr5_2	YEL028W	YEL028W	0.264444	0.688184	0.254769	0.0279902	no	no	no	no
YEL029C::chr5_2	YEL029C	BUD16	-0.0776497	0.0668554	0.608668	0.444955	no	no	no	no
YEL030W::chr5_2	YEL030W	ECM10	0.0523693	0.506072	0.46825	0.0820239	no	no	no	no
YEL031W::chr5_2	YEL031W	SPF1	0.179567	-0.00952277	0.334517	0.531684	no	no	no	no
YEL032W::chr5_2	YEL032W	MCM3	0.238377	-0.0587253	0.278172	0.587021	no	no	no	no
YEL033W::chr5_2	YEL033W	MTC7	0.209146	0.510649	0.305603	0.0800635	no	no	no	no
YEL034W::chr00_8	YEL034W	HYP2	0.380664	0.730485	0.164199	0.0210829	no	no	no	no
YEL035C::chr5_2	YEL035C	UTR5	0.349185	0.314039	0.186393	0.199424	no	no	no	no
YEL037C::chr5_2	YEL037C	RAD23	0.495757	0.422962	0.09817	0.124156	no	no	no	no
YEL040W::chr5_2	YEL040W	UTR2	0.253765	0.132529	0.26423	0.372289	no	no	no	no
YEL043W::chr5_2	YEL043W	YEL043W	0.294328	0.0919148	0.229265	0.416867	no	no	no	no
YEL045C::chr5_2	YEL045C	YEL045C	0.171848	0.306819	0.342237	0.205232	no	no	no	no
YEL046C::chr5_2	YEL046C	GLY1	-0.026518	-0.403012	0.554104	0.885358	no	no	no	no
YEL047C::chr5_2	YEL047C	YEL047C	0.381175	0.364986	0.163854	0.161321	no	no	no	no
YEL049W::chr5_2	YEL049W	PAU2	0.0257108	-0.129982	0.497297	0.663925	no	no	no	no
YEL050C::chr5_2	YEL050C	RML2	0.660504	0.378815	0.0407081	0.151858	no	no	no	no
YEL051W::chr5_2	YEL051W	VMA8	0.0931393	0.0931393	0.424205	0.415504	yes	yes	yes	yes
YEL052W::chr5_2	YEL052W	AFG1	0.0434583	0.234192	0.477949	0.268993	no	no	no	no
YEL053C::chr5_2	YEL053C	MAK10	-0.746728	-0.499992	0.98237	0.930417	no	no	no	no
YEL054C::chr5_2	YEL054C	RPL12A	0.251856	0.652145	0.265941	0.0352752	no	no	no	no
YEL055C::chr5_2	YEL055C	POL5	0.447668	0.344536	0.122911	0.176006	no	no	no	no
YEL058W::chr5_2	YEL058W	PCM1	0.0099254	-0.170482	0.514514	0.704971	no	no	no	no
YEL059W::chr5_2	YEL059W	HHY1	-0.100498	0.150868	0.632441	0.35267	no	no	no	no
YEL063C::chr5_2	YEL063C	CAN1	0.576274	0.207686	0.06524	0.294518	no	no	no	no
YEL064C::chr5_2	YEL064C	AVT2	-0.0281681	0.0251229	0.555887	0.492282	no	no	no	no
YEL065W::chr5_2	YEL065W	SIT1	-0.0792134	-0.225726	0.610309	0.756902	no	no	no	no
YEL066W::chr5_2	YEL066W	HPA3	0.452368	0.20791	0.120316	0.294297	no	no	no	no
YEL067C::chr5_2	YEL067C	YEL067C	0.328269	0.345666	0.202119	0.175173	no	no	no	no
YEL068C::chr5_2	YEL068C	YEL068C	-0.175676	-0.432946	0.706742	0.90106	no	no	no	no
YEL071W::chr5_2	YEL071W	DLD3	-0.23877	0.0310614	0.763131	0.485526	no	no	no	no
YEL072W::chr5_2	YEL072W	RMD6	0.380915	0.274118	0.164029	0.232763	no	no	no	no
YER001W::chr5_2	YER001W	MNN1	0.244717	0.236904	0.272385	0.266446	no	no	no	no
YER003C::chr5_2	YER003C	PMI40	0.258533	0.333465	0.259984	0.184298	no	no	no	no
YER005W::chr5_2	YER005W	YND1	0.123682	0.170791	0.391788	0.331793	no	no	no	no
YER007C-A::chr5_2	YER007C-A	TMA20	-0.17519	-0.39305	0.706284	0.879759	no	no	no	no
YER010C::chr5_2	YER010C	YER010C	-0.467279	-0.442195	0.910078	0.905577	no	no	no	no
YER013W::chr5_2	YER013W	PRP22	0.178995	-0.0211195	0.335088	0.544823	no	no	no	no
YER014W::chr5_2	YER014W	HEM14	-0.54338	-0.402093	0.939348	0.88485	no	no	no	no
YER019C-A::chr5_3	YER019C-A	SBH2	0.478921	0.295968	0.10638	0.214146	no	no	no	no
YER019W::chr5_3	YER019W	ISC1	0.031064	0.330171	0.491458	0.186812	no	no	no	no
YER020W::chr5_3	YER020W	GPA2	0.0919824	0.0944293	0.425444	0.414069	no	no	no	no
YER021W::chr5_3	YER021W	RPN3	0.2787	0.0960888	0.24242	0.412225	no	no	no	no
YER022W::chr5_3	YER022W	SRB4	0.111839	-0.309226	0.404281	0.825007	no	no	no	no
YER023W::chr5_3	YER023W	PRO3	0.155013	-0.318287	0.359299	0.83159	no	no	no	no
YER024W::chr5_3	YER024W	YAT2	0.321582	0.285916	0.20731	0.222601	no	no	no	no
YER025W::chr5_3	YER025W	GCD11	0.261411	0.261411	0.257438	0.243991	yes	yes	yes	yes
YER027C::chr00_11	YER027C	GAL83	-0.264232	-0.430508	0.784076	0.899843	no	no	no	no
YER027C::chr5_3	YER027C	GAL83	-0.0183881	0.162889	0.545305	0.340016	no	no	no	no
YER028C::chr5_3	YER028C	MIG3	0.258423	-0.202987	0.260082	0.736141	no	no	no	no
YER031C::chr00_10	YER031C	YPT31	0.279212	0.00514077	0.241983	0.515023	no	no	no	no
YER033C::chr5_3	YER033C	ZRG8	0.460728	0.481911	0.115796	0.0929758	no	yes	no	yes
YER034W::chr5_3	YER034W	YER034W	0.0405709	0.359195	0.481094	0.165397	no	no	no	no
YER035W::chr5_3	YER035W	EDC2	-0.893702	-0.571746	0.993916	0.953874	no	no	no	no
YER036C::chr5_3	YER036C	ARB1	0.0394979	0.0414132	0.482263	0.473758	no	no	no	no
YER037W::chr00_11	YER037W	PHM8	0.157876	0.202704	0.356376	0.299437	no	no	no	no
YER037W::chr5_3	YER037W	PHM8	0.173021	0.0248883	0.341059	0.492549	no	no	no	no
YER038C::chr5_3	YER038C	KRE29	0.063082	-0.217138	0.456617	0.749167	yes	no	yes	no
YER038W-A::chr5_3	YER038W-A	YER038W-A	0.0532435	-0.0314331	0.4673	0.556467	no	no	no	no
YER042W::chr5_3	YER042W	MXR1	0.0112316	0.133788	0.51309	0.370931	no	no	no	no
YER044C-A::chr5_3	YER044C-A	MEI4	-0.0168524	-0.241348	0.54364	0.770637	no	no	no	no
YER047C::chr5_3	YER047C	SAP1	0.26487	-0.0386542	0.254396	0.564592	no	no	no	no
YER048C::chr5_3	YER048C	CAJ1	-0.452368	-0.186915	0.903279	0.720941	no	no	no	no
YER049W::chr5_3	YER049W	TPA1	-0.24459	0.375211	0.768015	0.154288	no	no	no	no
YER051W::chr5_3	YER051W	JHD1	-0.246015	-0.617453	0.769202	0.965165	no	no	no	no
YER052C::chr5_3	YER052C	HOM3	0.020713	0.128874	0.502749	0.376241	no	no	no	no
YER056C-A::chr5_3	YER056C-A	RPL34A	0.56627	0.176919	0.0687906	0.325472	no	no	no	no
YER056C::chr5_3	YER056C	FCY2	-0.00686518	0.166281	0.532796	0.336477	no	no	no	no
YER057C::chr5_3	YER057C	HMF1	0.426483	0.229457	0.135094	0.27347	no	no	no	no
YER063W::chr00_10	YER063W	THO1	-0.552702	-0.709847	0.94235	0.98113	no	no	no	no
YER068W::chr5_3	YER068W	MOT2	-0.0073156	-0.21303	0.533285	0.745421	no	no	no	no
YER071C::chr5_3	YER071C	TDA2	-0.657866	-0.176785	0.968725	0.711146	no	no	no	no
YER073W::chr5_3	YER073W	ALD5	-0.103952	0.137105	0.635994	0.367361	no	no	no	no
YER074W::chr5_3	YER074W	RPS24A	0.758911	1.12079	0.0221307	0.000829018	no	no	no	yes
YER075C::chr5_3	YER075C	PTP3	-0.0814621	-0.108261	0.612666	0.641034	no	no	no	no
YER079W::chr5_3	YER079W	YER079W	-0.0677142	-0.0350091	0.598197	0.560494	no	no	no	no
YER080W::chr5_3	YER080W	AIM9	-0.186887	-0.346387	0.7172	0.850979	no	no	no	no
YER081W::chr5_3	YER081W	SER3	0.313652	0.389788	0.213566	0.144616	no	no	no	no
YER082C::chr5_3	YER082C	UTP7	0.536407	0.708363	0.0802784	0.0244903	no	no	no	no
YER083C::chr5_3	YER083C	GET2	0.388629	-0.0137351	0.158868	0.536462	no	no	no	no
YER084W::chr5_3	YER084W	YER084W	0.0467128	0.311168	0.474405	0.201722	no	no	no	no
YER085C::chr5_3	YER085C	YER085C	-0.561581	-0.341232	0.9451	0.847539	no	no	no	no
YER086W::chr5_3	YER086W	ILV1	0.749575	0.200207	0.0235122	0.301917	no	no	no	no
YER087W::chr5_3	YER087W	AIM10	-0.436542	-0.641518	0.895658	0.97013	no	no	no	no
YER088C::chr00_8	YER088C	DOT6	-0.449588	-0.886493	0.901971	0.995084	no	no	no	no
YER089C::chr00_17a	YER089C	PTC2	0.323716	-0.209936	0.205644	0.742581	no	no	no	no
YER090W::chr00_8	YER090W	TRP2	0.0245722	0.121739	0.498539	0.383993	no	no	no	no
YER091C-A::chr00_2	YER091C-A	YER091C-A	0.248863	0.412377	0.268633	0.130452	no	no	no	no
YER093C-A::chr00_8	YER093C-A	AIM11	0.048565	0.224628	0.472389	0.278074	no	no	no	no
YER096W::chr00_8	YER096W	SHC1	0.0163004	-0.228657	0.507562	0.759513	no	no	no	no
YER097W::chr00_8	YER097W	YER097W	-0.174338	-0.406081	0.705481	0.887045	no	no	no	no
YER106W::chr00_5	YER106W	MAM1	-0.172874	-0.256867	0.7041	0.783839	no	no	no	no
YER110C::chr00_5	YER110C	KAP123	0.0737126	-0.212912	0.445109	0.745313	no	no	no	no
YER112W::chr00_5	YER112W	LSM4	-0.550668	-0.445161	0.941706	0.906993	no	no	no	no
YER114C::chr00_5	YER114C	BOI2	0.0611106	-0.050699	0.458755	0.578082	no	no	no	no
YER115C::chr00_5	YER115C	SPR6	0.03222	-0.0922526	0.490198	0.623827	no	no	no	no
YER116C::chr00_5	YER116C	SLX8	0.266481	0.409429	0.252984	0.132244	no	no	no	no
YER117W::chr00_5	YER117W	RPL23B	-0.0281758	0.0722893	0.555895	0.438836	no	no	no	no
YER119C-A::chr00_5	YER119C-A	YER119C-A	0.405042	0.109026	0.148242	0.397918	no	no	no	no
YER119C::chr00_5	YER119C	AVT6	1.02079	0.670629	0.00318895	0.0313651	no	no	no	no
YER120W::chr00_5	YER120W	SCS2	-0.14464	-0.453764	0.676892	0.911011	no	no	no	no
YER121W::chr00_5	YER121W	YER121W	0.362884	0.52928	0.176515	0.0724475	no	no	no	no
YER122C::chr00_5	YER122C	GLO3	-0.125295	0.212573	0.657677	0.289729	no	no	no	no
YER124C::chr00_5	YER124C	DSE1	-0.0342827	0.0498253	0.562484	0.464212	no	no	no	no
YER125W::chr00_5	YER125W	RSP5	-0.0275372	0.424567	0.555206	0.12322	no	no	no	no
YER126C::chr00_5	YER126C	NSA2	-0.18889	0.668308	0.71905	0.0318355	no	no	no	no
YER128W::chr00_5	YER128W	VFA1	0.271063	0.680821	0.248995	0.029367	no	no	no	no
YER130C::chr00_5	YER130C	YER130C	0.43177	0.405902	0.131979	0.13441	no	no	no	no
YER133W::chr00_5	YER133W	GLC7	0.0792025	0.532545	0.439183	0.071172	no	no	no	no
YER142C::chr00_5	YER142C	MAG1	-0.053787	-0.199403	0.583401	0.732789	no	no	no	no
YER144C::chr00_2	YER144C	UBP5	0.35802	0.197731	0.179983	0.304385	no	no	no	no
YER146W::chr00_5	YER146W	LSM5	-0.036048	0.0273991	0.564385	0.489692	no	no	no	no
YER156C::chr00_5	YER156C	YER156C	-0.0390255	0.204176	0.567588	0.29798	no	no	no	no
YER158C::chr00_5	YER158C	YER158C	0.586408	0.938759	0.0617896	0.00431816	no	no	no	no
YER162C::chr00_5	YER162C	RAD4	-0.493039	0.313405	0.920977	0.19993	no	yes	no	yes
YER164W::chr00_5	YER164W	CHD1	0.303874	0.0903091	0.22143	0.418655	no	no	no	no
YER169W::chr00_5	YER169W	RPH1	-0.180707	0.227291	0.711457	0.275531	no	no	no	no
YER172C::chr00_5	YER172C	BRR2	-0.102572	-0.0942667	0.634576	0.626007	no	no	no	no
YER176W::chr00_5	YER176W	ECM32	-0.173952	0.102824	0.705117	0.404762	no	no	no	no
YER178W::chr00_5	YER178W	PDA1	-0.702049	-0.498638	0.976326	0.9299	no	no	no	no
YER179W::chr00_5	YER179W	DMC1	0.12243	0.0223779	0.393103	0.495407	no	no	no	no
YER184C::chr00_5	YER184C	YER184C	0.432736	0.176353	0.131415	0.326055	no	no	no	no
YER185W::chr00_5	YER185W	PUG1	0.899142	0.384052	0.00830906	0.148372	no	no	no	no
YER186C::chr00_5	YER186C	YER186C	-0.385879	0.462584	0.868357	0.102487	no	no	no	no
YER187W::chr00_5	YER187W	YER187W	0.462917	-0.0774858	0.114633	0.607733	no	no	no	no
YER188W::chr00_2	YER188W	YER188W	0.392925	1.26713	0.156039	0.000183304	no	no	no	yes
YFL002C::chr00_17a	YFL002C	SPB4	0.472722	0.117494	0.109524	0.388627	no	no	no	no
YFL003C::chr00_17a	YFL003C	MSH4	0.331805	0.157207	0.199405	0.345976	no	no	no	no
YFL009W::chr6_1	YFL009W	CDC4	-0.606482	-0.226185	0.957453	0.757312	no	no	no	no
YFL010C::chr00_17a	YFL010C	WWM1	-0.661176	-0.725381	0.969357	0.98308	no	no	no	no
YFL014W::chr00_15	YFL014W	HSP12	0.463395	0.297429	0.114379	0.212933	no	no	no	no
YFL018C::chr6_1	YFL018C	LPD1	-0.327988	-0.488194	0.831564	0.925805	no	no	no	no
YFL018W-A::chr6_1	YFL017W-A	SMX2	-0.27395	-0.484092	0.791778	0.924149	no	no	no	no
YFL020C::chr6_1	YFL020C	PAU5	-0.0835644	-0.321624	0.614865	0.833974	no	no	no	no
YFL026W::chr6_1	YFL026W	STE2	0.323822	0.108179	0.205562	0.398851	no	no	no	no
YFL027C::chr6_1	YFL027C	GYP8	-0.0226234	0.141031	0.549892	0.363149	no	no	no	no
YFL028C::chr6_1	YFL028C	CAF16	0.101613	0.0743685	0.415149	0.436498	no	no	no	no
YFL031W::chr6_1	YFL031W	HAC1	0.646897	0.302612	0.0440673	0.208661	no	no	no	no
YFL032W::chr6_1	YFL032W	YFL032W	0.0346171	0.201111	0.487584	0.301019	no	no	no	no
YFL033C::chr00_17a/chr00_18	YFL033C	RIM15	0.00102107	-0.122896	0.524215	0.656518	yes	no	yes	no
YFL034C-A::chr00_2	YFL034C-A	RPL22B	0.363667	0.298937	0.175961	0.211685	no	no	no	no
YFL034W::chr6_1	YFL034W	YFL034W	-0.218241	0.0089223	0.745462	0.510721	no	no	no	no
YFL035C-A::chr6_1	YFL034C-B	MOB2	-0.515546	-0.39409	0.929654	0.880352	no	no	no	no
YFL035C-B::chr6_1	YFL034C-A	RPL22B	0.305096	0.132007	0.220438	0.372853	no	no	no	no
YFL035C::chr6_1	YFL034C-B	MOB2	-0.392693	-0.12441	0.872292	0.658106	no	no	no	no
YFL038C::chr6_1	YFL038C	YPT1	0.381727	0.288652	0.163481	0.220281	no	no	no	no
YFL041W::chr6_1	YFL041W	FET5	-0.387852	-0.0974967	0.869505	0.629493	no	no	no	no
YFL047W::chr6_1	YFL047W	RGD2	0.0211727	-0.144829	0.502248	0.679235	no	no	no	no
YFL049W::chr6_1	YFL049W	SWP82	-0.306592	-0.17294	0.816435	0.707386	no	no	no	no
YFL050C::chr6_1	YFL050C	ALR2	-0.557009	-0.457686	0.943697	0.9128	no	no	no	no
YFL051C::chr6_1	YFL051C	YFL051C	0.214055	-1.04846	0.300913	0.998832	no	no	no	no
YFL052W::chr6_1	YFL052W	YFL052W	-0.94474	-1.02581	0.995937	0.998555	no	no	no	no
YFL056C::chr6_1	YFL056C	AAD6	-0.340151	-0.343679	0.839796	0.849179	no	no	no	no
YFR001W::chr6_1	YFR001W	LOC1	-0.424611	-0.136674	0.889631	0.670861	no	no	no	no
YFR002W::chr00_18	YFR002W	NIC96	-0.0848082	0.460442	0.616165	0.103583	no	no	no	no
YFR004W::chr6_1	YFR004W	RPN11	-1.80461	-0.510513	1	0.934341	no	no	no	no
YFR005C::chr6_1	YFR005C	SAD1	0.217851	0.39275	0.29731	0.142702	no	no	no	no
YFR006W::chr6_1	YFR006W	YFR006W	0.00435306	-0.115034	0.520586	0.64823	no	no	no	no
YFR007W::chr6_1	YFR007W	YFH7	-0.0567056	0.0893946	0.586512	0.419675	no	no	no	no
YFR008W::chr6_1	YFR008W	FAR7	0.0402101	0.0719532	0.481487	0.439214	no	no	no	no
YFR009W::chr6_1	YFR009W	GCN20	-0.517831	-0.322382	0.930492	0.834513	no	no	no	no
YFR011C::chr00_16b	YFR011C	AIM13	-0.208062	-0.318355	0.736451	0.831639	no	no	no	no
YFR011C::chr6_1	YFR011C	AIM13	-0.0747524	-0.229234	0.605622	0.760025	no	no	no	no
YFR012W::chr6_1	YFR012W	DCV1	0.133651	0.0156191	0.381355	0.5031	no	no	no	no
YFR015C::chr6_1	YFR015C	GSY1	-0.466678	-0.214275	0.909811	0.746559	no	no	no	no
YFR019W::chr00_15	YFR019W	FAB1	0.041806	0.135038	0.479748	0.369584	no	no	no	no
YFR021W::chr6_1	YFR021W	ATG18	-0.433512	-0.228637	0.89415	0.759495	no	no	no	no
YFR022W::chr6_1	YFR022W	ROG3	-0.569883	-0.65774	0.947576	0.973134	no	no	no	no
YFR023W::chr6_1	YFR023W	PES4	0.193666	-0.233395	0.320599	0.7637	yes	no	yes	no
YFR024C::chr00_15	YFR024C-A	LSB3	-0.22623	-0.0865537	0.752419	0.61764	no	no	no	no
YFR027W::chr6_1	YFR027W	ECO1	-0.130977	-0.00912667	0.663366	0.531235	no	no	no	no
YFR031C-A::chr6_1	YFR031C-A	RPL2A	-0.12638	-0.137557	0.658765	0.671771	no	no	no	no
YFR032C::chr00_2	YFR032C	RRT5	-0.202387	-0.0151892	0.731358	0.538109	no	no	no	no
YFR033C::chr00_2	YFR033C	QCR6	0.423964	0.236853	0.136596	0.266493	yes	no	yes	no
YFR035C::chr00_2	YFR035C	YFR035C	-0.017581	0.000297953	0.54443	0.52053	no	no	no	no
YFR036W::chr00_2	YFR036W	CDC26	-0.0867025	0.18865	0.618142	0.313512	no	no	no	no
YFR037C::chr00_2	YFR037C	RSC8	0.41209	0.41209	0.143829	0.130626	yes	yes	yes	yes
YFR039C::chr00_14	YFR039C	YFR039C	0.302633	0.0556802	0.222439	0.45758	no	no	no	no
YFR048W::chr00_2	YFR048W	RMD8	-0.306619	-0.11017	0.816454	0.643068	no	no	no	no
YFR049W::chr00_2	YFR049W	YMR31	-0.382037	-0.485949	0.866103	0.924902	no	no	no	no
YFR052W::chr00_2	YFR052W	RPN12	-0.242235	-0.219104	0.766046	0.75095	no	no	no	no
YFR053C::chr00_2	YFR053C	HXK1	-0.116939	-0.208024	0.649244	0.740817	no	no	no	no
YFR054C::chr00_2	YFR054C	YFR054C	-0.627697	-0.557976	0.962452	0.949948	no	no	no	no
YFR055W::chr00_2	YFR055W	IRC7	-0.555491	0.278298	0.943225	0.229134	no	no	no	no
YFR056C::chr00_2	YFR056C	YFR056C	-0.304834	-0.116483	0.815155	0.649763	no	no	no	no
YFR057W::chr00_2	YFR057W	YFR057W	-0.05645	0.354659	0.58624	0.168634	no	no	no	no
YGL001C::chr7_1	YGL001C	ERG26	-0.0182331	-0.133711	0.545137	0.667797	no	no	no	no
YGL002W::chr7_1	YGL002W	ERP6	-0.266645	-0.295163	0.786004	0.81447	no	no	no	no
YGL003C::chr7_1	YGL003C	CDH1	-0.139485	-0.338264	0.671814	0.845534	no	no	no	no
YGL006W::chr7_1	YGL006W	PMC1	-0.0308538	-0.204542	0.558786	0.73759	no	no	no	no
YGL007W::chr7_1	YGL007W	BRP1	-1.23053	-1.11394	0.999696	0.999382	no	no	no	no
YGL008C::chr7_1	YGL008C	PMA1	-0.0771431	-0.232757	0.608136	0.763139	no	no	no	no
YGL009C::chr7_1	YGL009C	LEU1	-0.079731	-0.483627	0.610852	0.923959	no	no	no	no
YGL010W::chr7_1	YGL010W	YGL010W	-0.0971806	-0.463056	0.629018	0.915205	no	no	no	no
YGL011C::chr7_1	YGL011C	SCL1	-0.532878	-0.170562	0.935821	0.70505	no	no	no	no
YGL013C::chr7_1	YGL013C	PDR1	0.368787	0.221863	0.172363	0.280727	no	no	no	no
YGL014W::chr7_1	YGL014W	PUF4	0.137062	0.514721	0.377806	0.078349	no	no	no	no
YGL015C::chr7_1	YGL015C	YGL015C	-0.197153	-0.060204	0.726617	0.588663	no	no	no	no
YGL016W::chr7_1	YGL016W	KAP122	-0.0885616	-0.321355	0.620079	0.833783	no	no	no	no
YGL017W::chr7_1	YGL017W	ATE1	-0.204798	0.0253059	0.733529	0.492074	no	no	no	no
YGL018C::chr7_1	YGL018C	JAC1	0.0552775	0.352483	0.465089	0.170202	no	no	no	no
YGL019W::chr7_1	YGL019W	CKB1	0.141112	0.324161	0.373604	0.191452	no	no	no	no
YGL020C::chr7_1	YGL020C	GET1	-0.148476	-0.0987056	0.680649	0.630795	no	no	no	no
YGL021W::chr7_1	YGL021W	ALK1	-0.0825021	0.215883	0.613755	0.286506	no	no	no	no
YGL023C::chr7_1	YGL023C	PIB2	0.434467	0.55216	0.130409	0.0638687	no	no	no	no
YGL024W::chr7_1	YGL024W	YGL024W	-0.0572743	-0.178717	0.587117	0.713027	no	no	no	no
YGL025C::chr7_1	YGL025C	PGD1	-0.39444	-0.335547	0.873287	0.843684	no	no	no	no
YGL026C::chr7_1	YGL026C	TRP5	-0.819068	-0.482544	0.989365	0.923516	no	no	no	no
YGL027C::chr7_1	YGL027C	CWH41	-0.217855	-0.0724188	0.745124	0.602167	no	no	no	no
YGL028C::chr7_1	YGL028C	SCW11	-0.132599	-0.18118	0.664983	0.715415	no	no	no	no
YGL029W::chr7_1	YGL029W	CGR1	0.299273	0.108391	0.225187	0.398618	no	no	no	no
YGL031C::chr7_1	YGL031C	RPL24A	0.366972	0.501613	0.173633	0.0839685	no	no	no	no
YGL033W::chr7_1	YGL033W	HOP2	0.194687	0.0807213	0.3196	0.42937	no	no	no	no
YGL035C::chr7_1	YGL035C	MIG1	-0.319005	-0.44203	0.825312	0.905498	no	no	no	no
YGL036W::chr7_1	YGL036W	YGL036W	-0.643559	-0.413734	0.965867	0.891174	no	no	no	no
YGL037C::chr7_1	YGL037C	PNC1	-0.077906	-0.0570107	0.608937	0.585115	no	no	no	no
YGL038C::chr7_1	YGL038C	OCH1	-0.0049085	-0.278983	0.530668	0.801872	no	no	no	no
YGL039W::chr7_1	YGL039W	YGL039W	0.079312	-0.0179236	0.439065	0.541206	no	no	no	no
YGL040C::chr7_1	YGL040C	HEM2	-0.132049	0.0546433	0.664435	0.458754	no	no	no	no
YGL041C::chr7_1	YGL041C	YGL041C	-0.0587393	-0.0582954	0.588677	0.586543	no	no	no	no
YGL042C::chr7_1	YGL042C	YGL042C	-0.161879	0.139128	0.693629	0.365189	no	no	no	no
YGL043W::chr7_1	YGL043W	DST1	0.395203	0.129168	0.154553	0.375922	no	no	no	no
YGL044C::chr7_1	YGL044C	RNA15	0.0789743	-0.0977063	0.439429	0.629719	no	no	no	no
YGL045W::chr7_1	YGL045W	RIM8	0.373512	0.483023	0.169084	0.092449	no	no	no	no
YGL046W::chr7_1	YGL045W	RIM8	0.0472988	0.285607	0.473767	0.222863	no	no	no	no
YGL047W::chr7_1	YGL047W	ALG13	0.0234435	0.170474	0.499771	0.332122	no	no	no	no
YGL048C::chr7_1	YGL048C	RPT6	-0.539674	-0.448285	0.938121	0.908468	no	no	no	no
YGL049C::chr7_1	YGL049C	TIF4632	-0.0696983	0.122632	0.600294	0.38302	no	no	no	no
YGL051W::chr7_1	YGL051W	MST27	-0.113392	0.18942	0.645642	0.312734	no	no	no	no
YGL053W::chr7_1	YGL053W	PRM8	-0.517852	-0.391108	0.930499	0.878645	no	no	no	no
YGL054C::chr7_1	YGL054C	ERV14	-0.370001	-0.0986728	0.858867	0.63076	no	no	no	no
YGL055W::chr7_1	YGL055W	OLE1	-0.230786	0.107607	0.756341	0.399482	no	no	no	no
YGL056C::chr7_1	YGL056C	SDS23	0.427803	0.54638	0.134311	0.0659577	no	no	no	no
YGL057C::chr7_1	YGL057C	GEP7	-0.0637323	-0.180716	0.59398	0.714966	no	no	no	no
YGL058W::chr7_1	YGL058W	RAD6	-0.324005	-0.372522	0.82881	0.86762	no	no	no	no
YGL059W::chr7_1	YGL059W	PKP2	-0.0619827	-0.27588	0.592123	0.799398	no	no	no	no
YGL060W::chr7_1	YGL060W	YBP2	-0.852818	-0.554109	0.9917	0.948798	no	no	no	no
YGL061C::chr7_1	YGL061C	DUO1	0.3159	0.263254	0.211781	0.242345	no	no	no	no
YGL062W::chr7_1	YGL062W	PYC1	-0.250542	-0.131863	0.772951	0.66588	no	no	no	no
YGL063W::chr7_1	YGL063W	PUS2	-1.02896	-0.729939	0.997993	0.983619	no	no	no	no
YGL064C::chr7_1	YGL064C	MRH4	-0.32559	-0.48798	0.82991	0.92572	no	no	no	no
YGL065C::chr7_1	YGL065C	ALG2	-0.344973	-0.521306	0.842987	0.938186	no	no	no	no
YGL066W::chr7_1	YGL066W	SGF73	-0.0939667	0.159036	0.625693	0.344054	no	no	no	no
YGL067W::chr7_1	YGL067W	NPY1	-0.117615	-0.122257	0.64993	0.655848	no	no	no	no
YGL068W::chr7_1	YGL068W	MNP1	-0.0717233	-0.177805	0.602431	0.712139	no	no	no	no
YGL069C::chr7_1	YGL069C	YGL069C	0.0941794	-0.049233	0.423091	0.576444	no	no	no	no
YGL070C::chr7_1	YGL070C	RPB9	0.245597	-0.518576	0.271587	0.93723	no	no	no	no
YGL071W::chr7_1	YGL071W	AFT1	-0.378249	-0.316213	0.863853	0.830098	no	no	no	no
YGL072C::chr7_1	YGL072C	YGL072C	-1.02399	-0.82692	0.997905	0.992061	no	no	no	no
YGL073W::chr7_1	YGL073W	HSF1	0.148358	0.0429866	0.366124	0.471972	no	no	no	no
YGL074C::chr7_1	YGL074C	YGL074C	0.168651	0.0744013	0.345454	0.436461	no	no	no	no
YGL075C::chr7_1	YGL075C	MPS2	-0.614045	-0.408648	0.959294	0.888442	no	no	no	no
YGL076C::chr7_1	YGL076C	RPL7A	-0.27973	-0.211051	0.796281	0.743606	no	no	no	no
YGL077C::chr7_1	YGL077C	HNM1	-0.112233	-0.122828	0.644463	0.656447	no	no	no	no
YGL078C::chr7_1	YGL078C	DBP3	-0.777913	-0.998191	0.98576	0.998136	no	no	no	no
YGL080W::chr7_1	YGL080W	FMP37	-0.282456	-0.0194136	0.798384	0.542893	no	no	no	no
YGL081W::chr7_1	YGL081W	YGL081W	-0.393352	-0.374219	0.872668	0.868654	no	no	no	no
YGL082W::chr7_1	YGL082W	YGL082W	0.0718748	-0.0203408	0.447095	0.543942	no	no	no	no
YGL083W::chr7_1	YGL083W	SCY1	0.0909892	0.0394703	0.426509	0.475965	no	no	no	no
YGL084C::chr7_1	YGL084C	GUP1	-0.219903	0.0590739	0.746918	0.453741	no	no	no	no
YGL085W::chr7_1	YGL085W	LCL3	-0.0756399	-0.0193445	0.606556	0.542815	no	no	no	no
YGL086W::chr7_1	YGL086W	MAD1	0.0390987	0.0475107	0.482698	0.466837	no	no	no	no
YGL088W::chr7_1	YGL088W	YGL088W	-0.0392364	0.0739265	0.567815	0.436995	no	no	no	no
YGL089C::chr7_1	YGL089C	MF(ALPHA)2	0.0318684	0.0328297	0.490581	0.483514	no	no	no	no
YGL090W::chr7_1	YGL090W	LIF1	-0.0765588	-0.334132	0.607522	0.842714	no	no	no	no
YGL091C::chr7_1	YGL091C	NBP35	-0.033421	-0.0761235	0.561555	0.606239	no	no	no	no
YGL092W::chr7_1	YGL092W	NUP145	0.327924	0.0570797	0.202384	0.455996	no	no	no	no
YGL093W::chr7_1	YGL093W	SPC105	0.171361	-0.143953	0.342726	0.678339	no	no	no	no
YGL094C::chr7_1	YGL094C	PAN2	-0.070578	-0.086426	0.601223	0.617501	no	no	no	no
YGL095C::chr7_1	YGL095C	VPS45	0.0428995	-0.0554952	0.478557	0.583429	no	no	no	no
YGL096W::chr7_1	YGL096W	TOS8	-0.0952646	0.2647	0.627037	0.241057	no	no	no	no
YGL097W::chr7_1/chr00_17a	YGL097W	SRM1	0.449476	0.42169	0.121908	0.124901	no	no	no	no
YGL098W::chr7_2	YGL098W	USE1	-0.393899	-0.322651	0.87298	0.834703	no	no	no	no
YGL102C::chr7_2	YGL102C	YGL102C	0.396277	0.259318	0.153855	0.245868	no	no	no	no
YGL103W::chr7_2	YGL103W	RPL28	0.204068	0.268913	0.310488	0.237327	no	no	no	no
YGL105W::chr7_2	YGL105W	ARC1	-0.0950157	0.0133274	0.626779	0.505708	no	no	no	no
YGL109W::chr7_2	YGL109W	YGL109W	-0.0464862	0.128907	0.575595	0.376206	no	no	no	no
YGL110C::chr7_2	YGL110C	CUE3	0.338916	0.0531029	0.194017	0.460498	no	no	no	no
YGL111W::chr7_2	YGL111W	NSA1	-0.151581	-0.161389	0.683677	0.695957	no	no	no	no
YGL112C::chr7_2	YGL112C	TAF6	0.461236	0.528922	0.115525	0.0725883	no	no	no	no
YGL113W::chr7_2	YGL113W	SLD3	0.511735	0.284476	0.0908173	0.223827	no	no	no	no
YGL114W::chr7_2	YGL114W	YGL114W	0.4022	0.414453	0.150047	0.1292	no	no	no	no
YGL115W::chr7_2	YGL115W	SNF4	0.578544	0.837385	0.0644545	0.00972256	no	no	no	no
YGL116W::chr7_2	YGL116W	CDC20	-0.453592	-0.449531	0.903851	0.909051	no	no	no	no
YGL117W::chr7_2	YGL117W	YGL117W	-0.243457	0.195744	0.767069	0.306372	no	no	no	no
YGL118C::chr7_2	YGL118C	YGL118C	0.0588721	-0.344753	0.461185	0.849894	no	no	no	no
YGL120C::chr7_2	YGL120C	PRP43	-0.487578	-0.326783	0.918754	0.837616	no	no	no	no
YGL121C::chr7_2	YGL121C	GPG1	0.507235	0.457143	0.0928453	0.105288	no	no	no	no
YGL122C::chr7_2	YGL122C	NAB2	0.345774	-0.0259843	0.188904	0.550321	no	no	no	no
YGL123W::chr7_2	YGL123W	RPS2	0.0935654	0.0500496	0.423748	0.463958	no	no	no	no
YGL124C::chr7_2	YGL124C	MON1	-0.420564	-0.212132	0.887531	0.744598	no	no	no	no
YGL125W::chr7_2	YGL125W	MET13	0.350136	0.194229	0.185696	0.30789	no	no	no	no
YGL126W::chr7_2	YGL126W	SCS3	0.482753	0.230471	0.104469	0.272509	no	no	no	no
YGL127C::chr7_2	YGL127C	SOH1	-0.0972981	0.024542	0.62914	0.492944	no	no	no	no
YGL128C::chr7_2	YGL128C	CWC23	-0.0546684	0.0396562	0.584341	0.475754	no	no	no	no
YGL129C::chr7_2	YGL129C	RSM23	-0.00985511	-0.447562	0.536045	0.908128	no	no	no	no
YGL130W::chr7_2	YGL130W	CEG1	0.462104	0.356436	0.115064	0.167361	no	no	no	no
YGL131C::chr7_2	YGL131C	SNT2	-0.254105	-0.528532	0.775877	0.94066	no	no	no	no
YGL132W::chr7_2	YGL132W	YGL132W	0.165879	0.0351862	0.348251	0.480835	no	no	no	no
YGL133W::chr7_2	YGL133W	ITC1	0.251515	0.507361	0.266247	0.0814682	no	no	no	no
YGL135W::chr7_2	YGL135W	RPL1B	-0.858912	-0.86947	0.99207	0.994347	no	no	no	no
YGL137W::chr7_2	YGL137W	SEC27	0.708408	-0.256479	0.0304988	0.783514	no	no	no	no
YGL138C::chr7_2	YGL138C	YGL138C	0.140992	-0.239093	0.373728	0.768682	no	no	no	no
YGL139W::chr7_2	YGL139W	FLC3	-0.222597	-0.409541	0.749268	0.888926	no	no	no	no
YGL140C::chr7_2	YGL140C	YGL140C	0.131489	-0.162396	0.383611	0.696962	no	no	no	no
YGL141W::chr7_2	YGL141W	HUL5	0.207204	-0.0621007	0.307467	0.590767	no	no	no	no
YGL146C::chr7_2	YGL146C	RRT6	0.654663	0.407385	0.0421237	0.133497	no	no	no	no
YGL148W::chr7_2	YGL148W	ARO2	0.423964	0.41194	0.136596	0.130717	yes	no	yes	no
YGL153W::chr7_2	YGL153W	PEX14	0.283667	-0.00938583	0.238195	0.531529	no	no	no	no
YGL155W::chr7_2	YGL155W	CDC43	0.441669	0.0827274	0.12628	0.427123	no	no	no	no
YGL167C::chr7_2	YGL167C	PMR1	0.330638	-0.155961	0.200299	0.690519	no	no	no	no
YGL169W::chr7_2	YGL169W	SUA5	0.621375	0.652386	0.0509684	0.0352218	no	no	no	no
YGL172W::chr7_2	YGL172W	NUP49	0.496117	0.257973	0.0979996	0.247078	no	no	no	no
YGL225W::chr7_3	YGL225W	VRG4	0.294693	0.0203615	0.228962	0.497702	no	no	no	no
YGR007W::chr7_3	YGR007W	ECT1	0.614551	0.399679	0.0529524	0.138292	no	no	no	no
YGR008C::chr7_3	YGR008C	STF2	-0.285111	1.12985	0.80042	0.000758668	no	yes	no	yes
YGR009C::chr7_3	YGR009C	SEC9	-0.539319	-0.309391	0.938003	0.825128	no	no	no	no
YGR010W::chr7_3	YGR010W	NMA2	0.360294	0.0917594	0.178357	0.417039	no	no	no	no
YGR011W::chr7_3/chr00_12	YGR011W	YGR011W	0.30963	0.0462602	0.216781	0.468256	no	no	no	no
YGR013W::chr7_3	YGR013W	SNU71	-0.128558	-0.157436	0.660948	0.692001	no	no	no	no
YGR014W::chr7_3	YGR014W	MSB2	0.180493	0.120173	0.333596	0.385701	no	no	no	no
YGR016W::chr7_3	YGR016W	YGR016W	-0.812269	-0.224898	0.988831	0.756162	no	no	no	no
YGR017W::chr7_3	YGR017W	YGR017W	-0.423024	-0.550795	0.888811	0.947797	no	no	no	no
YGR018C::chr7_3/chr00_12	YGR018C	YGR018C	-0.388266	-0.262772	0.869745	0.788744	no	no	no	no
YGR019W::chr7_3	YGR019W	UGA1	0.068425	-0.0795403	0.450828	0.609984	no	no	no	no
YGR021W::chr7_3	YGR021W	YGR021W	-0.387431	-0.708	0.869261	0.980886	no	no	no	no
YGR022C::chr7_3/chr00_12	YGR022C	YGR022C	-0.199202	-0.0434003	0.728479	0.569917	no	no	no	no
YGR023W::chr7_3	YGR023W	MTL1	-0.0247707	0.186565	0.552215	0.315623	no	no	no	no
YGR025W::chr7_3/chr00_12	YGR025W	YGR025W	-0.155371	-0.123167	0.687355	0.656803	no	no	no	no
YGR026W::chr7_3	YGR026W	YGR026W	0.204608	0.584883	0.309967	0.0529986	no	no	no	no
YGR044C::chr7_4	YGR044C	RME1	-0.26243	-0.120342	0.78263	0.653834	no	no	no	no
YGR045C::chr7_4	YGR045C	YGR045C	0.147472	0.285465	0.367036	0.222985	no	no	no	no
YGR046W::chr00_14	YGR046W	TAM41	0.0290302	0.414777	0.493677	0.129005	no	no	no	no
YGR048W::chr00_14	YGR048W	UFD1	-0.125055	-0.0286801	0.657435	0.553364	no	no	no	no
YGR051C::chr7_4	YGR051C	YGR051C	0.359758	0.284884	0.178739	0.22348	no	no	no	no
YGR052W::chr7_4	YGR052W	FMP48	0.256929	-0.13105	0.261408	0.665036	no	no	no	no
YGR055W::chr7_4	YGR055W	MUP1	-0.448266	-0.358436	0.901344	0.858817	no	no	no	no
YGR056W::chr7_4	YGR056W	RSC1	0.110081	0.0744867	0.406145	0.436365	no	no	no	no
YGR057C::chr7_4	YGR057C	LST7	-0.348296	-0.224133	0.84516	0.755477	no	no	no	no
YGR058W::chr7_4	YGR058W	PEF1	0.174685	0.185421	0.339392	0.316785	no	no	no	no
YGR059W::chr7_4	YGR059W	SPR3	0.544437	0.127856	0.0770556	0.377344	no	no	no	no
YGR061C::chr7_4	YGR061C	ADE6	-0.0850511	-0.263054	0.616419	0.788978	no	no	no	no
YGR063C::chr00_14	YGR063C	SPT4	0.117397	0.00635465	0.398405	0.513642	no	no	no	no
YGR065C::chr7_4	YGR065C	VHT1	-0.362759	-0.310746	0.854388	0.826122	no	no	no	no
YGR072W::chr7_4	YGR072W	UPF3	0.391057	0.463591	0.157265	0.101975	no	no	no	no
YGR076C::chr7_4	YGR076C	MRPL25	-0.124806	-0.627683	0.657185	0.967353	no	no	no	no
YGR077C::chr7_4	YGR077C	PEX8	-0.126293	-0.121465	0.658678	0.655016	no	no	no	no
YGR078C::chr7_4	YGR078C	PAC10	-0.262875	-0.180736	0.782987	0.714986	no	no	no	no
YGR080W::chr7_4	YGR080W	TWF1	0.0234006	-0.0491033	0.499817	0.576299	no	no	no	no
YGR081C::chr7_4	YGR081C	SLX9	0.0844287	-0.335009	0.433555	0.843316	no	no	no	no
YGR082W::chr00_14	YGR082W	TOM20	0.0160956	0.411924	0.507786	0.130727	no	no	no	no
YGR084C::chr7_4	YGR084C	MRP13	-0.137477	-0.457583	0.669828	0.912753	no	no	no	no
YGR088W::chr7_4	YGR088W	CTT1	-0.332688	-0.0685229	0.834777	0.597872	no	no	no	no
YGR089W::chr00_14	YGR089W	NNF2	0.0366043	-0.178894	0.485417	0.713198	no	no	no	no
YGR091W::chr7_4	YGR091W	PRP31	-0.234755	0.0819339	0.759729	0.428012	no	no	no	no
YGR092W::chr00_14	YGR092W	DBF2	-0.412421	-0.299917	0.88322	0.818075	no	no	no	no
YGR093W::chr00_14	YGR093W	YGR093W	-0.206253	-0.239158	0.734834	0.768739	no	no	no	no
YGR094W::chr7_4	YGR094W	VAS1	0.15559	0.21245	0.358709	0.289849	no	no	no	no
YGR096W::chr7_4	YGR096W	TPC1	0.256929	0.0164251	0.261408	0.502182	no	no	no	no
YGR098C::chr7_4	YGR098C	ESP1	0.117575	0.145426	0.398217	0.358454	no	no	no	no
YGR100W::chr7_4	YGR100W	MDR1	0.132615	0.0759755	0.382436	0.434693	no	no	no	no
YGR101W::chr7_4	YGR101W	PCP1	-0.771534	-0.859925	0.985117	0.993892	no	no	no	no
YGR103W::chr7_4	YGR103W	NOP7	-0.256219	-0.146178	0.777603	0.680611	no	no	no	no
YGR104C::chr7_4	YGR104C	SRB5	0.162962	-0.262727	0.351205	0.788707	no	no	no	no
YGR105W::chr7_4	YGR105W	VMA21	0.0186136	0.255638	0.505039	0.249187	no	no	no	no
YGR106C::chr00_14	YGR106C	VOA1	0.16847	0.565229	0.345636	0.0593361	no	no	no	no
YGR108W::chr7_4	YGR108W	CLB1	1.12475	0.741604	0.00129794	0.0195276	no	no	no	no
YGR109C::chr7_4	YGR109C	CLB6	0.265022	-0.0178519	0.254262	0.541125	no	no	no	no
YGR111W::chr7_4	YGR111W	YGR111W	0.483617	0.555599	0.104041	0.0626508	no	no	no	no
YGR113W::chr7_4	YGR113W	DAM1	-0.0912974	0.295499	0.622923	0.214536	no	no	no	no
YGR114C::chr7_4	YGR114C	YGR114C	0.694401	0.595845	0.033237	0.0497046	no	no	no	no
YGR116W::chr00_14	YGR116W	SPT6	0.22315	0.29193	0.292312	0.217519	no	no	no	no
YGR118W::chr7_4	YGR118W	RPS23A	-0.0697728	0.00287408	0.600373	0.517601	no	no	no	no
YGR119C::chr7_4	YGR119C	NUP57	0.0971615	0.461386	0.419901	0.103099	no	no	no	no
YGR120C::chr7_4	YGR120C	COG2	0.404948	0.542364	0.148302	0.0674395	no	no	no	no
YGR121C::chr7_4	YGR121C	MEP1	-0.440026	-0.314697	0.897372	0.829001	no	no	no	no
YGR124W::chr7_5	YGR124W	ASN2	0.0435512	-0.0729501	0.477847	0.602751	no	no	no	no
YGR125W::chr7_5	YGR125W	YGR125W	0.192055	0.0275931	0.322177	0.489471	no	no	no	no
YGR126W::chr7_5	YGR126W	YGR126W	0.0552787	-0.0549455	0.465088	0.582817	no	no	no	no
YGR127W::chr7_5	YGR127W	YGR127W	0.279918	-0.184458	0.24138	0.71858	no	no	no	no
YGR128C::chr7_5	YGR128C	UTP8	-0.161382	-0.0542995	0.693152	0.582097	no	no	no	no
YGR129W::chr7_5	YGR129W	SYF2	-0.0430658	-0.112513	0.571928	0.645558	no	no	no	no
YGR131W::chr7_5	YGR131W	FHN1	1.83603	2.15258	3.58269e-07	5.66744e-10	no	no	yes	yes
YGR132C::chr7_5	YGR132C	PHB1	0.0889817	0.059077	0.428663	0.453738	no	no	no	no
YGR134W::chr00_8	YGR134W	CAF130	-0.61752	-0.660021	0.960117	0.973535	no	no	no	no
YGR135W::chr7_5	YGR135W	PRE9	0.166809	0.292777	0.347312	0.216809	no	no	no	no
YGR136W::chr7_5	YGR136W	LSB1	-0.0705369	-0.071269	0.601179	0.6009	no	no	no	no
YGR137W::chr7_5	YGR137W	YGR137W	0.157277	0.367933	0.356987	0.159273	no	no	no	no
YGR138C::chr7_5	YGR138C	TPO2	0.228222	0.207074	0.287564	0.295121	no	no	no	no
YGR142W::chr7_5	YGR142W	BTN2	0.323395	0.265431	0.205894	0.240408	no	no	no	no
YGR144W::chr7_5	YGR144W	THI4	0.0328103	0.183367	0.489554	0.318875	no	no	no	no
YGR145W::chr00_15	YGR145W	ENP2	0.22204	0.134229	0.293355	0.370455	no	no	no	no
YGR147C::chr7_5	YGR147C	NAT2	-1.29632	-1.81271	0.999846	1	no	no	no	no
YGR148C::chr7_5	YGR148C	RPL24B	0.466658	0.691455	0.112664	0.0273961	no	no	no	no
YGR150C::chr7_5	YGR150C	CCM1	0.0591196	-0.0406334	0.460916	0.566814	no	no	no	no
YGR153W::chr7_5	YGR153W	YGR153W	0.236182	0.260057	0.28019	0.245205	no	no	no	no
YGR154C::chr7_5	YGR154C	GTO1	-0.19265	-0.205135	0.722506	0.73814	no	no	no	no
YGR155W::chr00_11	YGR155W	CYS4	0.155658	0.879371	0.35864	0.00701136	no	no	no	no
YGR155W::chr7_5	YGR155W	CYS4	0.483924	0.385236	0.10389	0.147592	no	no	no	no
YGR156W::chr7_5	YGR156W	PTI1	0.303927	-0.186177	0.221387	0.720233	no	no	no	no
YGR159C::chr7_5	YGR159C	NSR1	-0.0125723	0.272043	0.538996	0.234577	no	no	no	no
YGR160W::chr7_5	YGR160W	YGR160W	0.0815371	0.278646	0.436667	0.228833	no	no	no	no
YGR161C::chr7_5	YGR161C	RTS3	0.13305	0.257776	0.381982	0.247256	no	no	no	no
YGR162W::chr00_17a	YGR162W	TIF4631	-0.232354	0.111294	0.757682	0.395424	no	no	no	no
YGR163W::chr7_5	YGR163W	GTR2	-0.126188	0.501782	0.658573	0.0838939	no	no	no	no
YGR164W::chr7_5	YGR164W	YGR164W	0.0476533	0.353676	0.473381	0.169341	no	no	no	no
YGR165W::chr7_5	YGR165W	MRPS35	0.042588	0.239892	0.478897	0.263653	no	no	no	no
YGR167W::chr7_5	YGR167W	CLC1	0.0550433	-0.258157	0.465344	0.784916	no	no	no	no
YGR168C::chr7_5	YGR168C	YGR168C	0.193948	0.409948	0.320323	0.131928	no	no	no	no
YGR169C::chr7_5	YGR169C	PUS6	0.272611	0.303815	0.247655	0.207677	no	no	no	no
YGR170W::chr7_5	YGR170W	PSD2	0.140786	-0.205122	0.373942	0.738129	no	no	no	no
YGR171C::chr7_5	YGR171C	MSM1	-0.629229	-0.804293	0.962794	0.990541	no	no	no	no
YGR172C::chr7_5	YGR172C	YIP1	0.411296	0.163137	0.144322	0.339757	no	no	no	no
YGR173W::chr7_5	YGR173W	RBG2	-0.0250093	0.247669	0.552473	0.256455	no	no	no	no
YGR175C::chr7_5	YGR175C	ERG1	0.0633265	0.122723	0.456352	0.382921	no	no	no	no
YGR176W::chr7_5	YGR176W	YGR176W	-0.66451	-0.34238	0.969983	0.84831	no	no	no	no
YGR180C::chr7_5	YGR180C	RNR4	0.482501	0.814176	0.104594	0.0115836	no	no	no	no
YGR181W::chr7_5	YGR181W	TIM13	-0.0109732	-0.22489	0.53726	0.756155	no	no	no	no
YGR182C::chr7_5	YGR182C	YGR182C	0.0606301	-0.117922	0.459276	0.651283	no	no	no	no
YGR184C::chr7_5	YGR184C	UBR1	-0.510365	-0.168712	0.927724	0.703226	no	no	no	no
YGR185C::chr7_5	YGR185C	TYS1	-0.222251	-0.537818	0.748967	0.943725	no	no	no	no
YGR187C::chr7_5	YGR187C	HGH1	-0.464668	0.0328691	0.908914	0.48347	no	no	no	no
YGR188C::chr00_10	YGR188C	BUB1	-0.274428	0.087596	0.792152	0.421681	no	no	no	no
YGR189C::chr7_5	YGR189C	CRH1	-0.124362	0.00568336	0.656738	0.514406	no	no	no	no
YGR190C::chr7_5	YGR190C	YGR190C	0.00224014	-0.0312271	0.522888	0.556235	no	no	no	no
YGR191W::chr7_5	YGR191W	HIP1	-0.341043	-0.2704	0.84039	0.794984	no	no	no	no
YGR194C::chr7_5	YGR194C	XKS1	0.0334647	0.0253278	0.48884	0.492049	no	no	no	no
YGR195W::chr7_5	YGR195W	SKI6	-0.08668	-0.0679678	0.618118	0.597259	no	no	no	no
YGR196C::chr7_5	YGR196C	FYV8	0.297177	0.479551	0.22691	0.094101	no	no	no	no
YGR198W::chr7_5	YGR198W	YPP1	0.0100425	-0.0115408	0.514386	0.533974	no	no	no	no
YGR199W::chr7_5	YGR199W	PMT6	0.372559	0.43296	0.169743	0.118408	no	no	no	no
YGR201C::chr00_10	YGR201C	YGR201C	-0.0274319	0.154757	0.555092	0.348557	no	no	no	no
YGR202C::chr7_5	YGR202C	PCT1	-0.26789	-0.828436	0.786994	0.992154	no	no	no	no
YGR203W::chr7_5	YGR203W	YCH1	-0.395451	-0.0408709	0.873861	0.567081	no	no	no	no
YGR204W::chr00_10	YGR204W	ADE3	-0.733788	-0.431978	0.980772	0.900578	no	no	no	no
YGR205W::chr7_5	YGR205W	TDA10	0.683224	0.465773	0.0355646	0.100871	no	no	no	no
YGR206W::chr7_5	YGR206W	MVB12	1.42396	-0.0347431	6.40453e-05	0.560195	yes	no	yes	no
YGR207C::chr7_5	YGR207C	CIR1	0.0688132	0.0156453	0.450407	0.50307	no	no	no	no
YGR209C::chr7_5	YGR209C	TRX2	0.0577927	0.761443	0.462357	0.0169942	no	no	no	no
YGR211W::chr7_5	YGR211W	ZPR1	0.373001	0.590256	0.169438	0.051363	no	no	no	no
YGR212W::chr7_5	YGR212W	SLI1	0.113315	0.0723064	0.402719	0.438817	no	no	no	no
YGR213C::chr7_5	YGR213C	RTA1	-0.0891916	-0.0374158	0.620734	0.5632	no	no	no	no
YGR214W::chr7_5	YGR214W	RPS0A	0.103032	-0.354641	0.413637	0.85638	no	no	no	no
YGR217W::chr7_5	YGR217W	CCH1	0.477425	0.645322	0.107133	0.036816	no	no	no	no
YGR218W::chr7_5	YGR218W	CRM1	-0.312421	-0.858993	0.820638	0.993846	no	no	no	no
YGR219W::chr00_2	YGR219W	YGR219W	0.305631	0.231866	0.220005	0.271188	no	no	no	no
YGR220C::chr00_2	YGR220C	MRPL9	0.197227	-0.243566	0.317122	0.772552	no	no	no	no
YGR222W::chr00_2	YGR222W	PET54	0.0682421	0.0610544	0.451026	0.451503	no	no	no	no
YGR223C::chr00_2	YGR223C	HSV2	0.0191501	-0.00319828	0.504454	0.524503	no	no	no	no
YGR227W::chr00_2	YGR227W	DIE2	-0.118678	-0.112181	0.651006	0.645206	no	no	no	no
YGR232W::chr00_2	YGR232W	NAS6	0.0213263	-0.110916	0.50208	0.643861	no	no	no	no
YGR236C::chr00_2	YGR236C	SPG1	0.458662	0.230977	0.116901	0.272029	no	no	no	no
YGR237C::chr00_2	YGR237C	YGR237C	-0.716333	-0.309559	0.978424	0.825252	no	no	no	no
YGR239C::chr00_14	YGR239C	PEX21	-0.0175359	-0.0631385	0.544381	0.591918	no	no	no	no
YGR246C::chr00_2	YGR246C	BRF1	0.152269	0.0368901	0.362107	0.478898	no	no	no	no
YGR251W::chr00_2	YGR251W	NOP19	0.740193	0.756204	0.0249731	0.0176343	no	no	no	no
YGR254W::chr00_17a	YGR254W	ENO1	-0.163603	-0.406401	0.695282	0.88722	no	no	no	no
YGR256W::chr00_3	YGR256W	GND2	0.41209	0.184337	0.143829	0.317887	yes	no	yes	no
YGR258C::chr00_17a	YGR258C	RAD2	-0.290793	-0.000102594	0.804736	0.520985	no	no	no	no
YGR260W::chr00_3	YGR260W	TNA1	0.125516	0.179104	0.389862	0.323231	no	no	no	no
YGR261C::chr00_3	YGR261C	APL6	-0.227294	-0.35565	0.753338	0.85703	no	no	no	no
YGR262C::chr00_3	YGR262C	BUD32	-0.0810174	0.166951	0.6122	0.33578	no	no	no	no
YGR264C::chr00_3	YGR264C	MES1	0.0775599	0.104524	0.440955	0.402882	no	no	no	no
YGR270W::chr00_3	YGR270W	YTA7	0.24199	0.198736	0.274866	0.303382	no	no	no	no
YGR271W::chr00_17a	YGR271W	SLH1	0.188839	0.144914	0.325337	0.359	no	no	no	no
YGR278W::chr00_3	YGR278W	CWC22	-0.537407	-0.532038	0.937361	0.941832	no	no	no	no
YGR279C::chr00_3	YGR279C	SCW4	-0.319311	-0.239077	0.825528	0.768668	no	no	no	no
YGR281W::chr00_3	YGR281W	YOR1	0.238136	0.274586	0.278393	0.232355	no	yes	no	yes
YGR284C::chr00_3	YGR284C	ERV29	-0.726567	-0.905638	0.979829	0.995809	no	no	no	no
YGR287C::chr00_3	YGR287C	IMA1	0.527593	0.53926	0.0839316	0.0686028	no	no	no	no
YGR289C::chr00_17a	YGR289C	MAL11	0.92586	1.20574	0.00679152	0.000352201	no	no	no	yes
YGR292W::chr00_17a	YGR292W	MAL12	1.02533	0.580132	0.00307111	0.0544791	no	no	no	no
YGR295C::chr00_17b	YGR295C	COS6	0.400117	0.165701	0.151379	0.337081	yes	no	yes	no
YHL006C::chr8_1	YHL006C	SHU1	-0.426597	-0.467218	0.890651	0.917035	no	no	no	no
YHL008C::chr8_1	YHL008C	YHL008C	-0.377021	-0.41309	0.863119	0.890831	no	no	no	no
YHL010C::chr8_1	YHL010C	ETP1	0.106724	0.0764318	0.409709	0.434181	no	no	no	no
YHL014C::chr8_1	YHL014C	YLF2	-0.110603	-0.468091	0.642801	0.917414	no	no	no	no
YHL015W::chr8_1	YHL015W	RPS20	0.237754	0.274716	0.278744	0.232242	no	no	no	no
YHL016C::chr8_1	YHL016C	DUR3	-0.0540757	-0.120963	0.583709	0.654488	no	no	no	no
YHL017W::chr8_1	YHL017W	YHL017W	-0.916075	-0.659926	0.994892	0.973519	no	no	no	no
YHL019C::chr8_1	YHL019C	APM2	0.686688	0.511654	0.0348292	0.0796377	no	no	no	no
YHL021C::chr8_1	YHL021C	AIM17	0.476321	0.372961	0.10769	0.155818	no	no	no	no
YHL022C::chr8_1	YHL022C	SPO11	-0.252948	-0.293918	0.774929	0.813519	no	no	no	no
YHL025W::chr00_8	YHL025W	SNF6	-0.0547794	-0.190406	0.584459	0.724278	no	no	no	no
YHL026C::chr8_1	YHL026C	YHL026C	0.155724	0.0487595	0.358573	0.465421	no	no	no	no
YHL027W::chr8_1	YHL027W	RIM101	0.184069	0.122029	0.330047	0.383676	no	no	no	no
YHL028W::chr8_1	YHL028W	WSC4	-0.64508	-0.509269	0.966181	0.933886	no	no	no	no
YHL029C::chr8_1	YHL029C	OCA5	0.794269	0.314545	0.017503	0.199021	no	no	no	no
YHL031C::chr8_1	YHL031C	GOS1	0.351924	0.188048	0.18439	0.314121	no	no	no	no
YHL033C::chr8_1	YHL033C	RPL8A	-0.569807	-0.842817	0.947554	0.992996	no	no	no	no
YHL034C::chr8_1	YHL034C	SBP1	-0.364499	-0.164599	0.855473	0.699154	no	no	no	no
YHL035C::chr8_1	YHL035C	VMR1	-0.248936	-0.161842	0.771625	0.696409	no	no	no	no
YHL036W::chr8_1	YHL036W	MUP3	0.137083	0.0717607	0.377784	0.439431	yes	no	yes	no
YHL037C::chr8_1	YHL037C	YHL037C	0.237258	0.300172	0.279199	0.210666	no	no	no	no
YHL038C::chr8_1	YHL038C	CBP2	0.0864215	-0.23263	0.431412	0.763026	no	no	no	no
YHL039W::chr00_10	YHL039W	EFM1	0.217716	-0.159246	0.297437	0.693815	no	no	no	no
YHL040C::chr8_1	YHL040C	ARN1	0.356811	0.244436	0.180853	0.259435	no	no	no	no
YHL042W::chr8_1	YHL042W	YHL042W	0.326052	0.200812	0.203831	0.301315	no	no	no	no
YHL043W::chr8_1	YHL043W	ECM34	-0.272717	-0.127086	0.79081	0.660905	no	no	no	no
YHL044W::chr8_1	YHL044W	YHL044W	-0.250935	-0.168764	0.773275	0.703278	no	no	no	no
YHL047C::chr8_1	YHL047C	ARN2	-0.255174	-0.175799	0.776751	0.710184	no	no	no	no
YHR001W-A::chr8_1	YHR001W-A	QCR10	0.192117	0.86225	0.322116	0.00802383	no	no	no	no
YHR005C-A::chr00_3	YHR005C-A	TIM10	-0.179273	0.0386933	0.710116	0.476848	no	no	no	no
YHR010W::chr8_1	YHR010W	RPL27A	0.0805519	0.57238	0.437729	0.0569647	no	no	no	no
YHR012W::chr8_1	YHR012W	VPS29	0.611594	0.0456283	0.0538311	0.468973	no	no	no	no
YHR015W::chr8_1	YHR015W	MIP6	0.344951	-0.106717	0.189513	0.639386	no	no	no	no
YHR016C::chr00_8	YHR016C	YSC84	-1.82165	-1.75384	1	1	no	no	no	no
YHR017W::chr00_8	YHR017W	YSC83	0.154824	0.500761	0.359493	0.084344	no	no	no	no
YHR020W::chr8_1	YHR020W	YHR020W	0.13873	-0.189719	0.376073	0.723623	no	no	no	no
YHR021C::chr8_1	YHR021C	RPS27B	-0.207834	0.0178178	0.736248	0.500597	no	no	no	no
YHR022C::chr8_1	YHR022C	YHR022C	-0.238875	-0.0408436	0.76322	0.56705	no	no	no	no
YHR028C::chr8_1	YHR028C	DAP2	0.372019	0.34229	0.170116	0.177669	no	no	no	no
YHR030C::chr8_1	YHR030C	SLT2	-0.168663	-0.141007	0.700109	0.675321	no	no	no	no
YHR031C::chr8_1	YHR031C	RRM3	-0.177335	-0.176067	0.7083	0.710446	no	no	no	no
YHR032W::chr00_8	YHR032W	ERC1	-0.184872	0.0409508	0.715334	0.474284	no	no	no	no
YHR034C::chr8_1	YHR034C	PIH1	-0.106235	0.122324	0.638336	0.383356	no	no	no	no
YHR037W::chr8_1	YHR037W	PUT2	-0.177145	-0.124224	0.708122	0.657911	no	no	no	no
YHR038W::chr8_1	YHR038W	RRF1	0.445616	0.261101	0.124056	0.244269	no	no	no	no
YHR039C::chr8_1	YHR039C	MSC7	0.238043	0.15232	0.278478	0.351133	no	no	no	no
YHR040W::chr8_1	YHR040W	BCD1	0.375869	0.375869	0.167464	0.153842	yes	yes	yes	yes
YHR043C::chr8_1	YHR043C	DOG2	0.0843862	0.0974455	0.433601	0.410719	no	no	no	no
YHR045W::chr00_8	YHR045W	YHR045W	-0.499109	0.0159428	0.923393	0.502731	no	no	no	no
YHR050W::chr8_2	YHR050W	SMF2	0.0683694	0.305252	0.450888	0.206505	no	no	no	no
YHR051W::chr8_2	YHR051W	COX6	-0.100972	-0.636408	0.63293	0.969128	no	no	no	no
YHR057C::chr8_2	YHR057C	CPR2	0.257857	0.416129	0.260584	0.128196	no	no	no	no
YHR060W::chr8_2	YHR060W	VMA22	-0.0748191	0.0149817	0.605693	0.503825	no	no	no	no
YHR061C::chr8_2	YHR061C	GIC1	-0.0965165	-0.0615451	0.628332	0.590151	no	no	no	no
YHR062C::chr8_2	YHR062C	RPP1	-0.274784	0.902617	0.792431	0.00581782	no	yes	no	yes
YHR065C::chr8_2	YHR065C	RRP3	-0.111798	0.446202	0.64402	0.111088	no	no	no	no
YHR066W::chr8_2	YHR066W	SSF1	0.020633	0.349823	0.502836	0.172131	no	no	no	no
YHR068W::chr8_2	YHR068W	DYS1	-0.182965	-0.275645	0.713562	0.79921	no	no	no	no
YHR074W::chr8_2	YHR074W	QNS1	0.403565	-0.0262647	0.149179	0.550638	no	no	no	no
YHR075C::chr8_2	YHR075C	PPE1	-0.0496759	0.18784	0.579009	0.314332	no	no	no	no
YHR076W::chr8_2	YHR076W	PTC7	-0.254512	-0.277593	0.77621	0.800766	no	no	no	no
YHR081W::chr8_2	YHR081W	LRP1	0.199621	-0.154065	0.314794	0.688609	no	no	no	no
YHR086W::chr8_2	YHR086W	NAM8	0.205453	-0.11499	0.309152	0.648185	no	no	no	no
YHR087W::chr8_2	YHR087W	RTC3	-0.215381	-0.328056	0.742946	0.838507	no	no	no	no
YHR101C::chr8_2	YHR101C	BIG1	-0.52192	-1.15703	0.931973	0.999601	no	no	no	no
YHR107C::chr8_2	YHR107C	CDC12	-0.400292	-0.248381	0.876582	0.776675	no	no	no	no
YHR109W::chr8_2	YHR109W	CTM1	0.175095	0.181801	0.338981	0.320472	no	no	no	no
YHR112C::chr8_2	YHR112C	YHR112C	0.0730149	-0.356192	0.445863	0.857379	no	no	no	no
YHR113W::chr8_2	YHR113W	APE4	0.292143	0.510746	0.23108	0.0800222	no	no	no	no
YHR114W::chr8_2	YHR114W	BZZ1	0.0419575	0.182254	0.479583	0.32001	no	no	no	no
YHR115C::chr8_2	YHR115C	DMA1	0.0214203	-0.0893479	0.501978	0.620678	no	no	no	no
YHR116W::chr8_2	YHR116W	COX23	0.151438	0.116331	0.36296	0.3899	yes	no	yes	no
YHR117W::chr8_2	YHR117W	TOM71	-0.220125	-0.0409171	0.747112	0.567133	no	no	no	no
YHR118C::chr8_2	YHR118C	ORC6	-0.0332059	-0.026765	0.561323	0.551202	no	no	no	no
YHR120W::chr8_2	YHR120W	MSH1	0.323498	0.0298307	0.205814	0.486926	no	no	no	no
YHR121W::chr8_2	YHR121W	LSM12	0.307048	0.189747	0.218859	0.312403	no	no	no	no
YHR122W::chr8_2	YHR122W	YHR122W	-0.215981	-0.150523	0.743476	0.685028	no	no	no	no
YHR123W::chr8_2	YHR123W	EPT1	0.289666	0.0467369	0.233147	0.467715	no	no	no	no
YHR124W::chr8_2	YHR124W	NDT80	-0.0627775	-0.456027	0.592967	0.912047	no	no	no	no
YHR126C::chr8_2	YHR126C	ANS1	0.328561	0.0185525	0.201894	0.499761	no	no	no	no
YHR130C::chr8_2	YHR130C	YHR130C	0.0722156	0.427846	0.446727	0.121324	no	no	no	no
YHR131C::chr00_10	YHR131C	YHR131C	0.501717	0.150618	0.095378	0.352935	no	no	no	no
YHR132C::chr8_2	YHR132C	ECM14	0.638164	0.264564	0.0463386	0.241178	no	no	no	no
YHR135C::chr8_2	YHR135C	YCK1	-0.471802	-0.598709	0.912069	0.960844	no	no	no	no
YHR138C::chr8_2	YHR138C	YHR138C	0.137083	0.101975	0.377784	0.4057	yes	no	yes	no
YHR139C-A::chr8_2	YHR139C-A	YHR139C-A	0.0790991	0.326181	0.439295	0.189884	no	no	no	no
YHR139C::chr8_2	YHR139C	SPS100	-0.394832	0.0246616	0.87351	0.492807	no	no	no	no
YHR167W::chr8_3	YHR167W	THP2	0.868266	0.833159	0.0104268	0.0100406	yes	no	yes	no
YHR184W::chr8_3	YHR184W	SSP1	0.122583	0.118337	0.392942	0.387706	yes	no	yes	no
YHR188C::chr8_3	YHR188C	GPI16	0.118055	-0.0656117	0.397711	0.594655	no	no	no	no
YHR191C::chr00_8	YHR191C	CTF8	0.0819142	0.127277	0.436261	0.377972	no	no	no	no
YHR194W::chr00_10	YHR194W	MDM31	-0.208189	-0.284396	0.736565	0.806143	no	no	no	no
YHR200W::chr8_3	YHR200W	RPN10	0.0970211	-0.16626	0.420051	0.700801	no	no	no	no
YHR202W::chr8_3	YHR202W	YHR202W	0.646028	0.605324	0.0442892	0.0469896	no	no	no	no
YIL002C::chr9_1	YIL002C	INP51	0.0276257	-0.453093	0.495209	0.910703	no	no	no	no
YIL005W::chr9_1	YIL005W	EPS1	0.211948	0.369587	0.302922	0.158131	no	no	no	no
YIL007C::chr9_1	YIL007C	NAS2	0.348872	-0.363717	0.186622	0.862163	no	no	no	no
YIL009C-A::chr00_3	YIL009C-A	EST3	-0.526568	-1.56822	0.933626	0.999997	no	no	no	no
YIL010W::chr9_1	YIL010W	DOT5	-0.00542948	-0.0642379	0.531235	0.593135	no	no	no	no
YIL011W::chr9_1	YIL011W	TIR3	0.47337	0.310279	0.109192	0.202436	no	no	no	no
YIL012W::chr9_1	YIL012W	YIL012W	0.166356	-0.156289	0.347769	0.690848	no	no	no	no
YIL013C::chr9_1	YIL013C	PDR11	-0.277149	0.0781889	0.794277	0.432209	no	yes	no	yes
YIL015C-A::chr9_1	YIL014C-A	YIL014C-A	-0.182254	-0.334911	0.7129	0.843249	no	no	no	no
YIL015W::chr9_1	YIL015W	BAR1	-0.391671	-0.0587875	0.871707	0.58709	no	no	no	no
YIL017C::chr9_1	YIL017C	VID28	-0.0473689	-0.0876982	0.576541	0.618885	no	no	no	no
YIL019W::chr9_1	YIL019W	FAF1	0.457655	0.0588759	0.117443	0.453965	no	no	no	no
YIL020C::chr9_1	YIL020C	HIS6	-0.298452	-0.273924	0.810463	0.797829	no	no	no	no
YIL022W::chr9_1	YIL022W	TIM44	0.197034	0.347338	0.317311	0.173946	no	no	no	no
YIL026C::chr9_1	YIL026C	IRR1	-0.516812	-0.460674	0.930119	0.914144	no	no	no	no
YIL028W::chr9_1	YIL028W	YIL028W	-0.522695	0.0616152	0.93225	0.450869	no	no	no	no
YIL029C::chr9_1	YIL029C	YIL029C	0.0397142	0.239502	0.482028	0.264017	no	no	no	no
YIL031W::chr9_1	YIL031W	ULP2	0.449054	0.470549	0.122142	0.0984848	no	no	no	no
YIL033C::chr00_17b	YIL033C	BCY1	1.03667	0.631574	0.00279332	0.0400879	no	no	no	no
YIL035C::chr9_1	YIL035C	CKA1	0.322297	0.341714	0.20675	0.178097	no	no	no	no
YIL036W::chr9_1	YIL036W	CST6	-0.382292	-0.401329	0.866253	0.884425	no	no	no	no
YIL037C::chr9_1	YIL037C	PRM2	-0.0556333	-0.0416514	0.585369	0.567956	no	no	no	no
YIL041W::chr9_1	YIL041W	GVP36	-0.49931	-0.722982	0.923472	0.982791	no	no	no	no
YIL045W::chr9_1	YIL045W	PIG2	0.415732	0.680875	0.141583	0.0293567	no	no	no	no
YIL046W::chr9_1	YIL046W	MET30	0.335628	0.399179	0.196497	0.138607	no	no	no	no
YIL047C::chr9_1	YIL047C	SYG1	-0.438212	-0.0928586	0.896482	0.624484	no	no	no	no
YIL048W::chr9_1	YIL048W	NEO1	0.049758	-0.163322	0.471091	0.697883	no	no	no	no
YIL049W::chr9_1	YIL049W	DFG10	0.0931393	-0.193507	0.424205	0.727227	yes	no	yes	no
YIL050W::chr9_1	YIL050W	PCL7	0.461847	0.411416	0.1152	0.131034	no	no	no	no
YIL052C::chr9_1	YIL052C	RPL34B	0.523692	0.922821	0.0855882	0.00493073	no	no	no	no
YIL053W::chr9_1	YIL053W	RHR2	0.314664	0.286941	0.212761	0.22173	no	no	no	no
YIL054W::chr9_1	YIL054W	YIL054W	0.0214077	0.230306	0.501991	0.272665	no	no	no	no
YIL055C::chr9_1	YIL055C	YIL055C	-0.0642217	0.00886587	0.594499	0.510785	no	no	no	no
YIL056W::chr9_1	YIL056W	VHR1	0.0271366	-0.0767491	0.495742	0.606925	no	no	no	no
YIL057C::chr9_1	YIL057C	RGI2	0.124362	0.143233	0.391073	0.360794	no	no	no	no
YIL059C::chr9_1	YIL059C	YIL059C	-0.206884	0.0553993	0.735399	0.457898	no	no	no	no
YIL060W::chr9_1	YIL060W	YIL060W	-0.363116	-0.0826204	0.854611	0.613352	no	no	no	no
YIL061C::chr9_1	YIL061C	SNP1	0.191048	0.450772	0.323165	0.108638	no	no	no	no
YIL062C::chr9_1	YIL062C	ARC15	-0.141797	0.158293	0.674096	0.344833	no	no	no	no
YIL063C::chr9_1	YIL063C	YRB2	0.149903	0.164097	0.364536	0.338754	no	no	no	no
YIL065C::chr9_1	YIL065C	FIS1	-0.323154	-0.306096	0.828218	0.822695	no	no	no	no
YIL066C::chr9_1	YIL066C	RNR3	0.710739	0.337507	0.0300617	0.181243	no	no	no	no
YIL067C::chr9_1	YIL067C	YIL067C	-0.413494	-0.487044	0.883794	0.925344	no	no	no	no
YIL068C::chr9_1	YIL068C	SEC6	-0.28815	-0.15767	0.802735	0.692236	no	no	no	no
YIL069C::chr9_1	YIL069C	RPS24B	-0.473547	-0.159905	0.912828	0.694475	no	no	no	no
YIL070C::chr9_1	YIL070C	MAM33	0.0758752	0.463645	0.442773	0.101947	no	no	no	no
YIL071C::chr9_1	YIL071C	PCI8	-0.128611	0.249783	0.661001	0.254516	no	no	no	no
YIL072W::chr9_1	YIL072W	HOP1	0.0617828	0.144405	0.458026	0.359543	no	no	no	no
YIL073C::chr9_1	YIL073C	SPO22	-0.112577	-0.190299	0.644813	0.724177	no	no	no	no
YIL074C::chr9_1	YIL074C	SER33	-0.400623	-0.404826	0.876767	0.886357	no	no	no	no
YIL075C::chr9_1	YIL075C	RPN2	0.0429705	-0.039052	0.47848	0.565039	no	no	no	no
YIL078W::chr9_1	YIL078W	THS1	0.401856	-0.412013	0.150266	0.890255	no	no	no	no
YIL084C::chr9_1	YIL084C	SDS3	-0.252066	-0.588674	0.774205	0.958357	no	no	no	no
YIL085C::chr9_1	YIL085C	KTR7	-0.294627	-0.203942	0.807616	0.737032	no	no	no	no
YIL087C::chr9_1	YIL087C	AIM19	-0.698802	-0.823739	0.975826	0.991861	no	no	no	no
YIL088C::chr9_1	YIL088C	AVT7	-0.481501	-0.446923	0.916226	0.907827	no	no	no	no
YIL090W::chr9_1	YIL090W	ICE2	0.0368727	0.188613	0.485125	0.313549	no	no	no	no
YIL091C::chr9_1	YIL091C	UTP25	-0.149007	-0.23713	0.681168	0.766972	no	no	no	no
YIL092W::chr9_1	YIL092W	YIL092W	0.0494981	-0.0132725	0.471373	0.535937	no	no	no	no
YIL093C::chr9_1	YIL093C	RSM25	-0.0632641	-0.421448	0.593483	0.895225	no	no	no	no
YIL096C::chr9_1	YIL096C	YIL096C	-0.02855	0.0956879	0.5563	0.41267	no	no	no	no
YIL100W::chr9_2	YIL100W	YIL100W	0.0402179	-0.16656	0.481479	0.701098	no	no	no	no
YIL101C::chr9_2	YIL101C	XBP1	0.183733	0.325579	0.33038	0.190351	no	no	no	no
YIL102C::chr9_2	YIL102C	YIL102C	-1.49098	-0.0244927	0.999983	0.548636	no	no	no	no
YIL103W::chr9_2	YIL103W	DPH1	0.16341	-0.0765942	0.35075	0.606755	no	no	no	no
YIL104C::chr9_2	YIL104C	SHQ1	0.276955	0.0957066	0.243914	0.412649	no	no	no	no
YIL108W::chr9_2	YIL108W	YIL108W	-0.146281	0.0516517	0.678501	0.462142	no	no	no	no
YIL111W::chr9_2	YIL111W	COX5B	-0.162898	-0.14597	0.694606	0.680399	no	no	no	no
YIL113W::chr9_2	YIL113W	SDP1	0.718952	0.478835	0.0285631	0.0944441	no	no	no	no
YIL118W::chr9_2	YIL118W	RHO3	-0.00198101	0.0666672	0.527483	0.445168	no	no	no	no
YIL119C::chr9_2	YIL119C	RPI1	-0.139695	-0.451951	0.672022	0.910176	no	no	no	no
YIL120W::chr9_2	YIL120W	QDR1	0.417037	0.116669	0.140784	0.38953	no	no	no	no
YIL122W::chr9_2	YIL122W	POG1	-0.217941	-0.197084	0.745198	0.730608	no	no	no	no
YIL123W::chr9_2	YIL123W	SIM1	-0.535012	-0.123767	0.93655	0.657433	no	no	no	no
YIL124W::chr9_2	YIL124W	AYR1	0.22322	0.178632	0.292245	0.323714	no	no	no	no
YIL125W::chr9_2	YIL125W	KGD1	-0.106779	-0.0170772	0.638893	0.540248	no	no	no	no
YIL128W::chr9_2	YIL128W	MET18	0.429844	0.283396	0.133108	0.22475	no	no	no	no
YIL129C::chr9_2	YIL129C	TAO3	-0.541084	-0.158394	0.93859	0.692962	no	no	no	no
YIL130W::chr9_2	YIL130W	ASG1	-0.404519	-0.756145	0.878925	0.986439	no	no	no	no
YIL131C::chr9_2	YIL131C	FKH1	0.41209	0.259745	0.143829	0.245485	yes	no	yes	no
YIL132C::chr9_2	YIL132C	CSM2	0.0673603	0.0783399	0.45198	0.432039	no	no	no	no
YIL133C::chr9_2	YIL133C	RPL16A	0.379303	0.147473	0.165122	0.356274	no	no	no	no
YIL135C::chr9_2	YIL135C	VHS2	0.374421	0.909658	0.168459	0.00549377	no	no	no	no
YIL137C::chr9_2	YIL137C	TMA108	0.76604	0.907704	0.0211223	0.00558207	no	no	no	no
YIL138C::chr9_2	YIL138C	TPM2	0.471726	-0.121193	0.110035	0.654729	no	no	no	no
YIL139C::chr9_2	YIL139C	REV7	0.32667	0.352109	0.203353	0.170473	no	no	no	no
YIL142W::chr9_2	YIL142W	CCT2	1.42787	2.85736	6.13212e-05	2.74198e-16	no	yes	yes	yes
YIL144W::chr9_2	YIL144W	TID3	0.291566	0.18614	0.23156	0.316055	no	no	no	no
YIL145C::chr9_2	YIL145C	PAN6	0.506028	0.368972	0.0933948	0.158555	no	no	no	no
YIL148W::chr9_2	YIL148W	RPL40A	0.432556	0.256764	0.13152	0.248169	no	no	no	no
YIL152W::chr9_2	YIL152W	YIL152W	0.20847	0.326116	0.306251	0.189934	no	yes	no	yes
YIL153W::chr9_2	YIL153W	RRD1	0.595997	0.563376	0.0586575	0.0599629	no	no	no	no
YIL154C::chr9_2	YIL154C	IMP2'	0.186181	0.342061	0.327958	0.177839	no	no	no	no
YIL155C::chr9_2	YIL155C	GUT2	-0.132687	0.0703832	0.665071	0.440981	no	no	no	no
YIL156W::chr9_2	YIL156W	UBP7	-0.308372	0.0170814	0.817725	0.501435	no	no	no	no
YIL157C::chr9_2	YIL157C	COA1	-0.656679	-0.916245	0.968495	0.996168	no	no	no	no
YIL160C::chr9_2	YIL160C	POT1	0.103253	-0.0925623	0.413402	0.624163	no	no	no	no
YIL161W::chr9_2	YIL161W	YIL161W	0.360188	0.280751	0.178432	0.227018	no	no	no	no
YIL162W::chr9_2	YIL162W	SUC2	-0.0567843	-0.0368824	0.586596	0.562601	no	no	no	no
YIL163C::chr9_2	YIL163C	YIL163C	-0.118553	-0.25884	0.650878	0.785486	no	no	no	no
YIL165C::chr9_2	YIL165C	YIL165C	0.221803	-0.0272155	0.293579	0.551711	no	no	no	no
YIL167W::chr9_2	YIL167W	SDL1	-1.63421	-0.926275	0.999997	0.996482	no	no	no	no
YIL170W::chr9_2	YIL170W	HXT12	0.126094	-0.277389	0.389256	0.800603	no	no	no	no
YIL171W::chr9_2	YIL171W	YIL171W	-0.0128966	-0.110883	0.539348	0.643826	no	no	no	no
YIL173W::chr9_2	YIL173W	VTH1	-0.0507069	-0.186636	0.580111	0.720673	no	no	no	no
YIR003W::chr9_2	YIR003W	AIM21	-0.292679	-0.293115	0.806156	0.812904	no	no	no	no
YIR004W::chr9_2	YIR004W	DJP1	0.850778	0.115819	0.0118238	0.390461	yes	no	yes	no
YIR005W::chr9_2	YIR005W	IST3	-0.286049	-0.0432615	0.801137	0.569762	no	no	no	no
YIR006C::chr9_2	YIR006C	PAN1	0.352942	0.387	0.18365	0.146434	no	no	no	no
YIR007W::chr9_2	YIR007W	YIR007W	-0.105464	0.085612	0.637545	0.423897	no	no	no	no
YIR008C::chr9_2	YIR008C	PRI1	-0.643163	-0.802675	0.965785	0.990423	no	no	no	no
YIR009W::chr9_2	YIR009W	MSL1	-0.140478	-0.281816	0.672796	0.804115	no	no	no	no
YIR011C::chr9_2	YIR011C	STS1	0.351594	0.177087	0.184631	0.3253	no	no	no	no
YIR013C::chr9_2	YIR013C	GAT4	0.105776	0.0574141	0.410717	0.455618	no	no	no	no
YIR014W::chr9_2	YIR014W	YIR014W	0.187501	-0.178009	0.326655	0.712338	no	no	no	no
YIR015W::chr9_2	YIR015W	RPR2	0.0778028	0.224486	0.440693	0.27821	no	no	no	no
YIR016W::chr9_2	YIR016W	YIR016W	-0.12139	-0.146422	0.653746	0.680859	no	no	no	no
YIR024C::chr00_3	YIR024C	YIR024C	-0.288951	-0.192632	0.803343	0.726397	no	no	no	no
YIR030C::chr00_17b	YIR030C	DCG1	-0.378903	-0.0578005	0.864244	0.585993	no	no	no	no
YIR031C::chr00_3	YIR031C	DAL7	-0.140682	-0.0583274	0.672997	0.586579	no	no	no	no
YIR034C::chr00_3	YIR034C	LYS1	0.0277318	0.122885	0.495093	0.382745	no	no	no	no
YIR039C::chr00_3	YIR039C	YPS6	-0.305565	-0.196869	0.815687	0.730405	no	no	no	no
YIR043C::chr00_17b	YIR043C	YIR043C	-0.349919	-0.135548	0.846215	0.669697	no	no	no	no
YIR044C::chr00_17b	YIR044C	YIR044C	-0.153658	-0.276871	0.685695	0.80019	no	no	no	no
YJL006C::chr00_13	YJL006C	CTK2	0.420911	0.06639	0.138432	0.44548	no	no	no	no
YJL009W::chr00_13	YJL009W	YJL009W	1.41342	1.87076	7.19748e-05	6.27461e-08	no	no	yes	yes
YJL018W::chr00_13	YJL019W	MPS3	-0.093075	0.0379049	0.624768	0.477744	no	no	no	no
YJL019W::chr00_13	YJL019W	MPS3	-0.00933377	-0.153604	0.535479	0.688144	no	no	no	no
YJL020C::chr00_13	YJL020C	BBC1	0.311085	0.33958	0.215614	0.179688	no	no	no	no
YJL021C::chr00_13	YJL020C	BBC1	-0.668448	-0.307178	0.970708	0.823497	no	no	no	no
YJL022W::chr00_13	YJL022W	YJL022W	-0.461572	-0.281976	0.907519	0.80424	no	no	no	no
YJL024C::chr00_13	YJL024C	APS3	0.105141	0.191499	0.411392	0.310636	no	no	no	no
YJL026W::chr00_13	YJL026W	RNR2	0.0152433	0.125998	0.508715	0.37936	no	no	no	no
YJL028W::chr00_13	YJL028W	YJL028W	0.320463	-0.0597668	0.208185	0.588178	no	no	no	no
YJL032W::chr10_2	YJL032W	YJL032W	0.171274	0.0642306	0.342813	0.447916	no	no	no	no
YJL035C::chr10_2	YJL035C	TAD2	0.577298	0.296589	0.0648846	0.21363	no	no	no	no
YJL037W::chr10_2	YJL037W	IRC18	0.0622823	0.0305346	0.457484	0.486125	no	no	no	no
YJL038C::chr10_2	YJL038C	LOH1	-0.0235416	-0.0762537	0.550886	0.606382	no	no	no	no
YJL041W::chr00_15	YJL041W	NSP1	0.216121	0.121385	0.298949	0.384379	no	no	no	no
YJL044C::chr10_2	YJL044C	GYP6	-0.313365	-0.426439	0.821313	0.897788	no	no	no	no
YJL049W::chr10_2	YJL049W	YJL049W	0.0440732	0.185489	0.477279	0.316716	no	no	no	no
YJL050W::chr10_2	YJL050W	MTR4	-0.035296	-0.43523	0.563575	0.90219	no	no	no	no
YJL051W::chr10_2	YJL051W	IRC8	0.416214	0.204614	0.141288	0.297547	no	no	no	no
YJL052W::chr10_2	YJL052W	TDH1	-0.43915	-0.0283204	0.896943	0.552958	no	no	no	no
YJL055W::chr10_2	YJL055W	YJL055W	0.1073	-0.00983052	0.409096	0.532034	no	no	no	no
YJL056C::chr10_2	YJL056C	ZAP1	-0.266341	0.130268	0.785762	0.374732	no	no	no	no
YJL057C::chr10_2	YJL057C	IKS1	-0.347986	-0.32088	0.844958	0.833444	no	no	no	no
YJL058C::chr10_2	YJL058C	BIT61	-0.0983089	-0.23235	0.630184	0.76278	no	no	no	no
YJL063C::chr10_2	YJL063C	MRPL8	0.113764	0.0530983	0.402243	0.460503	no	no	no	no
YJL067W::chr10_2	YJL067W	YJL067W	-0.572954	-0.341228	0.948469	0.847536	no	no	no	no
YJL070C::chr00_15	YJL070C	YJL070C	-0.00016833	-0.489696	0.52551	0.926405	no	no	no	no
YJL071W::chr10_2	YJL071W	ARG2	-0.25597	-0.265559	0.7774	0.791037	no	no	no	no
YJL072C::chr10_2	YJL072C	PSF2	-0.65193	-0.469167	0.967564	0.917881	no	no	no	no
YJL073W::chr10_2	YJL073W	JEM1	0.0828477	0.00512699	0.435256	0.515039	no	no	no	no
YJL075C::chr10_2	YJL075C	APQ13	-0.733002	-0.661396	0.980671	0.973775	no	no	no	no
YJL076W::chr10_2	YJL076W	NET1	0.00143964	-0.0742133	0.523759	0.60414	no	no	no	no
YJL077C::chr10_2	YJL077C	ICS3	-0.403976	-0.0889371	0.878625	0.620232	no	no	no	no
YJL078C::chr00_15	YJL078C	PRY3	0.215201	-0.100325	0.299823	0.632538	no	no	no	no
YJL079C::chr10_2	YJL079C	PRY1	0.305232	0.16846	0.220328	0.334211	no	no	no	no
YJL086C::chr10_2	YJL086C	YJL086C	-0.294821	-0.100408	0.807761	0.632626	no	no	no	no
YJL088W::chr10_2	YJL088W	ARG3	-0.086462	0.00266895	0.617891	0.517834	no	no	no	no
YJL090C::chr10_2	YJL090C	DPB11	0.395354	0.132007	0.154455	0.372853	no	no	no	no
YJL091C::chr10_2	YJL091C	GWT1	-0.0488428	0.0158695	0.578118	0.502815	no	no	no	no
YJL097W::chr00_15	YJL097W	PHS1	0.00102107	-1.69826	0.524215	1	yes	no	yes	no
YJL099W::chr10_2	YJL099W	CHS6	0.18423	0.271619	0.329888	0.234949	no	no	no	no
YJL103C::chr00_18	YJL103C	GSM1	0.0400522	-0.0744167	0.481659	0.604364	no	no	no	no
YJL104W::chr10_2	YJL104W	PAM16	0.212124	-0.0713811	0.302754	0.601024	no	no	no	no
YJL105W::chr00_15	YJL105W	SET4	-1.15091	-1.42382	0.999338	0.999981	no	no	no	no
YJL108C::chr10_2	YJL108C	PRM10	0.175903	0.223777	0.338173	0.278889	no	no	no	no
YJL109C::chr10_2	YJL109C	UTP10	0.357047	-0.189975	0.180682	0.723867	no	no	no	no
YJL110C::chr10_2	YJL110C	GZF3	-0.282244	-0.175221	0.798221	0.709619	no	no	no	no
YJL111W::chr10_2	YJL111W	CCT7	1.77962	1.86827	7.83126e-07	6.52343e-08	no	yes	yes	yes
YJL112W::chr10_2	YJL112W	MDV1	0.00595816	0.0818914	0.518837	0.428059	no	no	no	no
YJL115W::chr10_2	YJL115W	ASF1	-0.0331191	-0.125363	0.56123	0.659103	no	no	no	no
YJL116C::chr10_2	YJL116C	NCA3	0.333994	0.391704	0.197737	0.143376	no	no	no	no
YJL117W::chr10_2	YJL117W	PHO86	-0.475869	-0.151033	0.91383	0.685545	no	no	no	no
YJL118W::chr10_2	YJL118W	YJL118W	0.366118	-0.266654	0.174232	0.791934	no	no	no	no
YJL119C::chr10_2	YJL119C	YJL119C	-1.22609	-1.0509	0.999682	0.998859	no	no	no	no
YJL120W::chr10_2	YJL120W	YJL120W	0.656664	0.688456	0.0416343	0.0279406	no	no	no	no
YJL123C::chr10_2	YJL123C	MTC1	-0.612954	-0.661924	0.959032	0.973867	no	no	no	no
YJL124C::chr10_2	YJL124C	LSM1	-0.164575	-0.358936	0.696211	0.859137	no	no	no	no
YJL128C::chr00_15	YJL128C	PBS2	0.0906152	0.0572641	0.42691	0.455788	no	no	no	no
YJL129C::chr00_14	YJL129C	TRK1	0.129436	0.0542027	0.385756	0.459253	no	no	no	no
YJL129C::chr10_1	YJL129C	TRK1	-0.16213	0.566711	0.69387	0.0588384	no	no	no	no
YJL130C::chr10_1	YJL130C	URA2	-0.0393455	-0.29304	0.567932	0.812846	no	no	no	no
YJL131C::chr10_1	YJL131C	AIM23	-0.0717279	-0.00190766	0.602436	0.523037	no	no	no	no
YJL132W::chr00_14	YJL132W	YJL132W	-0.545166	-0.319235	0.939933	0.83227	no	no	no	no
YJL132W::chr10_1	YJL132W	YJL132W	-0.316863	-0.227965	0.8238	0.758898	no	no	no	no
YJL133W::chr10_1	YJL133W	MRS3	-0.103294	-0.104014	0.635318	0.636495	no	no	no	no
YJL134W::chr10_1	YJL134W	LCB3	0.00856016	0.0246978	0.516002	0.492766	no	no	no	no
YJL135W::chr10_1	YJL135W	YJL135W	0.622509	0.329466	0.0506445	0.187353	yes	no	yes	no
YJL138C::chr10_1	YJL138C	TIF2	0.525749	0.180658	0.0847118	0.32164	no	no	no	no
YJL139C::chr00_14	YJL139C	YUR1	-0.0863211	0.317682	0.617744	0.196532	no	no	no	no
YJL141C::chr00_14	YJL141C	YAK1	-0.354429	-0.610301	0.849119	0.963565	no	no	no	no
YJL142C::chr10_1	YJL142C	IRC9	0.199308	0.290451	0.315097	0.218763	no	no	no	no
YJL146W::chr10_1	YJL146W	IDS2	0.485442	-0.0555448	0.103143	0.583484	no	no	no	no
YJL147C::chr10_1	YJL147C	YJL147C	0.274586	0.27034	0.24595	0.236071	yes	no	yes	no
YJL149W::chr10_1	YJL149W	DAS1	0.0993519	-0.232285	0.417561	0.762722	no	no	no	no
YJL152W::chr10_1	YJL152W	YJL152W	0.356453	-0.0191669	0.18111	0.542614	no	no	no	no
YJL153C::chr10_1	YJL153C	INO1	-0.180923	-0.0812522	0.711659	0.611857	no	no	no	no
YJL155C::chr10_1	YJL155C	FBP26	-0.0685255	-0.332125	0.599055	0.841333	no	no	no	no
YJL157C::chr10_1	YJL157C	FAR1	-0.58626	-0.536121	0.9522	0.943174	no	no	no	no
YJL159W::chr10_1	YJL159W	HSP150	0.293854	0.147794	0.229658	0.355933	no	no	no	no
YJL160C::chr00_14	YJL160C	YJL160C	-0.304539	-0.036458	0.81494	0.562124	no	no	no	no
YJL162C::chr10_1	YJL162C	JJJ2	-0.736973	-0.511918	0.981176	0.934852	no	no	no	no
YJL169W::chr10_1	YJL169W	YJL169W	-0.347942	-0.134592	0.84493	0.668709	no	no	no	no
YJL171C::chr10_1	YJL171C	YJL171C	-0.505883	-0.630855	0.926023	0.968007	no	no	no	no
YJL173C::chr10_1	YJL173C	RFA3	0.248228	0.351275	0.269206	0.171077	no	no	no	no
YJL174W::chr00_14	YJL174W	KRE9	-0.296926	-0.578795	0.80933	0.955786	no	no	no	no
YJL176C::chr10_1	YJL176C	SWI3	0.394045	0.288482	0.155307	0.220425	no	no	no	no
YJL177W::chr00_14	YJL177W	RPL17B	0.150636	-0.268054	0.363783	0.793076	no	no	no	no
YJL178C::chr10_1	YJL178C	ATG27	0.111521	0.0653282	0.404619	0.446678	no	no	no	no
YJL179W::chr10_1	YJL179W	PFD1	-0.391055	-0.291632	0.871354	0.811764	no	no	no	no
YJL180C::chr10_1	YJL180C	ATP12	-0.203815	-0.167488	0.732645	0.702017	no	no	no	no
YJL181W::chr10_1	YJL181W	YJL181W	-0.666045	-0.684588	0.970267	0.97755	no	no	no	no
YJL182C::chr10_1	YJL182C	YJL182C	-0.374006	-0.571611	0.861304	0.953837	no	no	no	no
YJL183W::chr10_1	YJL183W	MNN11	-0.817598	-0.6054	0.989251	0.962434	no	no	no	no
YJL184W::chr00_14	YJL184W	GON7	0.584894	0.414387	0.0622959	0.12924	no	no	no	no
YJL184W::chr10_1	YJL184W	GON7	0.174868	0.0400136	0.339209	0.475348	no	no	no	no
YJL185C::chr10_1	YJL185C	YJL185C	0.0322563	0.213007	0.490158	0.289306	no	no	no	no
YJL186W::chr10_1	YJL186W	MNN5	0.169889	0.0369651	0.344207	0.478812	no	no	no	no
YJL187C::chr10_1	YJL187C	SWE1	-0.326427	-0.402136	0.830488	0.884873	no	no	no	no
YJL192C::chr10_1	YJL192C	SOP4	0.470506	-0.0135858	0.110664	0.536292	yes	no	yes	no
YJL195C::chr00_14	YJL195C	YJL195C	0.0285396	0.127179	0.494212	0.378078	no	no	no	no
YJL196C::chr00_14	YJL196C	ELO1	0.10304	-0.369107	0.413629	0.865521	no	no	no	no
YJL197W::chr10_1	YJL197W	UBP12	-0.236403	-0.3536	0.761129	0.855706	no	no	no	no
YJL198W::chr10_1	YJL198W	PHO90	0.56078	0.725914	0.0708015	0.021752	no	no	no	no
YJL200C::chr00_14	YJL200C	ACO2	0.402453	-0.0790459	0.149886	0.609443	no	no	no	no
YJL202C::chr00_14	YJL202C	YJL202C	0.10192	0.0924329	0.414822	0.41629	no	no	no	no
YJL202C::chr10_1	YJL202C	YJL202C	0.205297	-0.176863	0.309302	0.711222	no	no	no	no
YJL204C::chr10_1	YJL204C	RCY1	0.614767	0.193936	0.0528888	0.308185	no	no	no	no
YJL206C-A::chr10_1	YJL205C	NCE101	-0.0899813	0.247412	0.621556	0.256692	no	no	no	no
YJL208C::chr10_1	YJL208C	NUC1	-0.208308	0.0498403	0.736672	0.464195	no	no	no	no
YJL210W::chr10_1	YJL210W	PEX2	0.600367	0.4294	0.0572723	0.120433	no	no	no	no
YJL211C::chr10_1	YJL211C	YJL211C	0.0505422	-0.10134	0.470238	0.633627	no	no	no	no
YJL212C::chr10_1	YJL212C	OPT1	-0.0927685	0.0848183	0.62445	0.424784	no	no	no	no
YJL215C::chr10_1	YJL215C	YJL215C	-0.24701	-0.236638	0.770029	0.766543	no	no	no	no
YJL216C::chr10_1	YJL216C	IMA5	-0.115554	0.295902	0.64784	0.2142	no	no	no	no
YJR014W::chr00_13	YJR014W	TMA22	-0.389946	-0.194082	0.870716	0.727772	no	no	no	no
YJR015W::chr00_13	YJR015W	YJR015W	0.508901	0.0656855	0.0920904	0.446275	no	no	no	no
YJR016C::chr00_13	YJR016C	ILV3	-0.201416	0.151763	0.730482	0.351722	no	no	no	no
YJR020W::chr00_13	YJR020W	YJR020W	-0.0968094	-0.017618	0.628635	0.54086	no	no	no	no
YJR021C::chr00_13	YJR021C	REC107	-0.917006	-1.33759	0.994929	0.999945	no	no	no	no
YJR022W::chr00_17b	YJR022W	LSM8	0.367525	0.19325	0.173245	0.308874	no	no	no	no
YJR023C::chr00_13	YJR023C	YJR023C	-0.295716	-0.227013	0.808429	0.758051	no	no	no	no
YJR025C::chr00_13	YJR025C	BNA1	-0.0395819	-0.0976794	0.568187	0.62969	no	no	no	no
YJR026W::chr00_13	YJR026W	YJR026W	0.0778252	-0.0316331	0.440669	0.556693	no	no	no	no
YJR031C::chr00_13	YJR031C	GEA1	-0.0773315	0.0944828	0.608334	0.414009	no	no	no	no
YJR032W::chr00_13	YJR032W	CPR7	0.166722	-0.158627	0.3474	0.693195	no	no	no	no
YJR035W::chr00_13	YJR035W	RAD26	0.399544	-0.192842	0.151747	0.726596	no	no	no	no
YJR039W::chr00_13	YJR039W	YJR039W	0.603471	0.264268	0.0563042	0.241442	no	no	no	no
YJR041C::chr00_13	YJR041C	URB2	-0.245666	-0.428259	0.768911	0.89871	no	no	no	no
YJR042W::chr00_13	YJR042W	NUP85	-0.106937	0.255674	0.639055	0.249154	no	no	no	no
YJR043C::chr00_13	YJR043C	POL32	0.523079	0.443776	0.0858506	0.112403	no	no	no	no
YJR045C::chr00_13	YJR045C	SSC1	0.517069	0.520714	0.0884559	0.075877	no	no	no	no
YJR047C::chr00_13	YJR047C	ANB1	-0.520856	-0.400214	0.93159	0.883804	no	no	no	no
YJR050W::chr00_13	YJR050W	ISY1	0.0993673	0.0968954	0.417545	0.411329	no	no	no	no
YJR052W::chr00_13	YJR052W	RAD7	0.430826	0.533663	0.132531	0.0707391	no	no	no	no
YJR055W::chr00_13	YJR055W	HIT1	-0.296406	0.00107017	0.808943	0.519652	no	no	no	no
YJR056C::chr00_13	YJR056C	YJR056C	-0.612732	-0.208955	0.958979	0.741677	no	no	no	no
YJR060W::chr00_13	YJR060W	CBF1	0.219277	0.0435689	0.295961	0.47131	no	no	no	no
YJR061W::chr00_13	YJR061W	YJR061W	-0.482563	-0.431118	0.916672	0.900148	no	no	no	no
YJR062C::chr00_13	YJR062C	NTA1	-0.0750792	-0.103313	0.605966	0.635744	no	no	no	no
YJR066W::chr00_13	YJR066W	TOR1	-0.0138961	-0.0951157	0.540433	0.626924	no	no	no	no
YJR067C::chr00_12	YJR067C	YAE1	0.179292	0.285763	0.334791	0.222731	no	no	no	no
YJR068W::chr00_12	YJR068W	RFC2	-0.440953	-0.702867	0.897825	0.980193	no	no	no	no
YJR069C::chr00_12	YJR069C	HAM1	-0.0181709	-0.332249	0.545069	0.841419	no	no	no	no
YJR070C::chr00_12	YJR070C	LIA1	-0.326478	-0.583338	0.830524	0.956984	no	no	no	no
YJR072C::chr10_4	YJR072C	NPA3	-0.105787	-0.150164	0.637876	0.684664	no	no	no	no
YJR073C::chr10_4	YJR073C	OPI3	0.09429	-0.261186	0.422972	0.787433	no	no	no	no
YJR074W::chr00_12	YJR074W	MOG1	-0.365983	0.298463	0.856394	0.212076	no	no	no	no
YJR075W::chr10_4	YJR075W	HOC1	0.700666	0.648226	0.0319881	0.0361537	no	no	no	no
YJR076C::chr10_4	YJR076C	CDC11	-0.0115817	0.170165	0.537921	0.332442	no	no	no	no
YJR077C::chr00_12	YJR077C	MIR1	0.0362391	0.16106	0.485815	0.34193	no	no	no	no
YJR078W::chr10_4	YJR078W	BNA2	0.166537	-0.282778	0.347586	0.804872	no	no	no	no
YJR079W::chr10_4	YJR079W	YJR079W	0.0738559	0.128217	0.444954	0.376952	no	no	no	no
YJR080C::chr00_12	YJR080C	AIM24	0.170697	0.193378	0.343394	0.308745	no	no	no	no
YJR083C::chr10_4	YJR083C	ACF4	-0.0720698	-0.308223	0.602797	0.824268	no	no	no	no
YJR084W::chr00_12	YJR084W	YJR084W	-0.0362918	-0.0353002	0.564647	0.560821	no	no	no	no
YJR087W::chr00_12	YJR087W	YJR087W	0.157612	0.108898	0.356645	0.398059	no	no	no	no
YJR088C::chr10_4	YJR088C	EMC2	-0.170135	-0.272835	0.701506	0.796952	no	no	no	no
YJR090C::chr00_12	YJR090C	GRR1	0.191507	0.17169	0.322715	0.330863	no	no	no	no
YJR091C::chr00_12	YJR091C	JSN1	-0.155784	0.0266478	0.687755	0.490547	no	no	no	no
YJR092W::chr10_4	YJR092W	BUD4	-0.406792	-0.543539	0.880171	0.94555	no	no	no	no
YJR093C::chr00_12	YJR093C	FIP1	-0.270836	-0.0269442	0.789328	0.551405	no	no	no	no
YJR094C::chr00_12	YJR094C	IME1	0.495919	0.486086	0.0980933	0.0910096	no	no	no	no
YJR094W-A::chr00_12	YJR094W-A	RPL43B	-0.675425	-0.590997	0.971958	0.958944	no	no	no	no
YJR095W::chr00_12	YJR095W	SFC1	0.362792	0.359386	0.17658	0.165261	no	no	no	no
YJR096W::chr00_12	YJR096W	YJR096W	0.19815	0.185272	0.316223	0.316936	no	no	no	no
YJR097W::chr00_12	YJR097W	JJJ3	-0.0930788	-0.0767947	0.624772	0.606975	no	no	no	no
YJR098C::chr00_12	YJR098C	YJR098C	0.546568	0.628937	0.0762171	0.0407418	no	no	no	no
YJR099W::chr00_12	YJR099W	YUH1	0.034261	-0.0245859	0.487972	0.548742	no	no	no	no
YJR100C::chr00_12	YJR100C	AIM25	0.145533	0.434117	0.369035	0.117755	no	no	no	no
YJR102C::chr10_4	YJR102C	VPS25	-0.0768392	-0.205155	0.607817	0.738159	no	no	no	no
YJR103W::chr10_4	YJR103W	URA8	0.806829	0.668563	0.0160713	0.0317836	no	no	no	no
YJR104C::chr00_12	YJR104C	SOD1	0.103937	0.182857	0.412673	0.319395	no	no	no	no
YJR105W::chr10_4	YJR105W	ADO1	0.55804	0.261056	0.071822	0.244309	no	no	no	no
YJR108W::chr10_4	YJR108W	ABM1	0.0718443	-0.161442	0.447128	0.69601	no	no	no	no
YJR109C::chr00_12	YJR109C	CPA2	-0.0374149	-0.113811	0.565856	0.646935	no	no	no	no
YJR110W::chr10_4	YJR110W	YMR1	0.459752	0.454348	0.116318	0.106748	no	no	no	no
YJR111C::chr10_4	YJR111C	YJR111C	-0.0578186	-0.042211	0.587697	0.568584	no	no	no	no
YJR112W::chr00_12	YJR112W	NNF1	0.0535988	0.133197	0.466914	0.371568	no	no	no	no
YJR113C::chr00_12	YJR113C	RSM7	-0.33449	-0.221899	0.835999	0.753471	no	no	no	no
YJR115W::chr10_4	YJR115W	YJR115W	0.215361	0.533193	0.299672	0.0709208	no	no	no	no
YJR116W::chr00_12	YJR116W	TDA4	0.309663	0.365102	0.216754	0.16124	no	no	no	no
YJR117W::chr00_12	YJR117W	STE24	0.457523	-0.0638515	0.117514	0.592707	no	no	no	no
YJR118C::chr00_12	YJR118C	ILM1	-0.545855	-0.477748	0.940157	0.92153	no	no	no	no
YJR119C::chr00_12	YJR119C	JHD2	0.383566	0.274203	0.162243	0.23269	no	no	no	no
YJR120W::chr00_12	YJR120W	YJR120W	-0.031828	-0.0791742	0.559837	0.609583	no	no	no	no
YJR121W::chr00_12	YJR121W	ATP2	2.01211	3.57936	2.68968e-08	1.49119e-24	no	yes	yes	yes
YJR122W::chr00_12	YJR122W	IBA57	0.10768	0.0203615	0.408693	0.497702	no	no	no	no
YJR123W::chr00_12	YJR123W	RPS5	0.766765	1.17026	0.0210221	0.000506964	no	no	no	yes
YJR124C::chr00_12	YJR124C	YJR124C	0.593511	0.692332	0.0594575	0.0272387	no	no	no	no
YJR125C::chr00_12	YJR125C	ENT3	0.350904	0.420487	0.185135	0.125609	no	no	no	no
YJR126C::chr00_12	YJR126C	VPS70	0.458724	0.158559	0.116868	0.344555	no	no	no	no
YJR127C::chr10_4	YJR127C	RSF2	0.277915	0.130374	0.243092	0.374617	no	no	no	no
YJR128W::chr10_4	YJR128W	YJR128W	0.307477	0.428531	0.218513	0.12093	no	no	no	no
YJR129C::chr10_4	YJR129C	YJR129C	0.0608474	0.0625339	0.459041	0.449831	no	no	no	no
YJR130C::chr10_4	YJR130C	STR2	0.0284295	-0.129664	0.494332	0.663593	no	no	no	no
YJR131W::chr00_12	YJR131W	MNS1	-0.388406	-0.385225	0.869826	0.875227	no	no	no	no
YJR133W::chr00_12	YJR133W	XPT1	0.576433	0.605324	0.0651845	0.0469896	no	no	no	no
YJR134C::chr00_12	YJR134C	SGM1	-0.205506	-0.0279629	0.734164	0.552554	no	no	no	no
YJR135C::chr10_4	YJR135C	MCM22	-1.15123	-0.889936	0.99934	0.995222	no	no	no	no
YJR137C::chr10_4	YJR137C	MET5	-0.32336	-0.13518	0.828362	0.669317	no	no	no	no
YJR139C::chr00_12	YJR139C	HOM6	-0.41227	-0.1622	0.883138	0.696766	no	no	no	no
YJR140C::chr00_12	YJR140C	HIR3	0.169383	0.337343	0.344716	0.181367	no	no	no	no
YJR141W::chr00_12	YJR141W	YJR141W	0.0342853	0.145199	0.487946	0.358696	no	no	no	no
YJR142W::chr00_12	YJR142W	YJR142W	0.169167	0.0637541	0.344934	0.448454	no	no	no	no
YJR144W::chr00_12	YJR144W	MGM101	-0.399536	0.0852007	0.87616	0.424357	no	no	no	no
YJR145C::chr00_12	YJR145C	RPS4A	-0.153767	-0.272903	0.6858	0.797007	no	no	no	no
YJR146W::chr10_4	YJR146W	YJR146W	0.444144	0.795851	0.124882	0.0132644	no	no	no	no
YJR147W::chr10_4	YJR147W	HMS2	0.894106	-1.22802	0.00862632	0.999812	yes	no	yes	no
YJR148W::chr00_12	YJR148W	BAT2	-0.296755	-0.0817669	0.809203	0.61242	no	no	no	no
YJR149W::chr10_4	YJR149W	YJR149W	-0.011445	0.00451214	0.537772	0.515738	no	no	no	no
YJR150C::chr00_12	YJR150C	DAN1	0.206594	0.250395	0.308053	0.253956	no	no	no	no
YJR152W::chr10_4	YJR152W	DAL5	0.501389	0.404984	0.0955298	0.134978	no	no	no	no
YJR153W::chr00_12	YJR153W	PGU1	-0.136661	-0.201756	0.66902	0.734993	no	no	no	no
YJR154W::chr10_4	YJR154W	YJR154W	0.655616	0.29334	0.04189	0.216338	no	no	no	no
YKL001C::chr11_1	YKL001C	MET14	-0.870557	-0.759471	0.992736	0.986765	no	no	no	no
YKL004W::chr11_1	YKL004W	AUR1	0.0311098	0.289071	0.491408	0.219927	no	no	no	no
YKL005C::chr00_12	YKL005C	BYE1	-0.342544	0.00867242	0.841385	0.511005	no	no	no	no
YKL006C-A::chr11_1	YKL006C-A	SFT1	0.0232332	-0.111563	0.5	0.644549	no	no	no	no
YKL006W::chr11_1	YKL006W	RPL14A	0.234344	0.646903	0.281884	0.0364541	no	no	no	no
YKL009W::chr11_1	YKL009W	MRT4	0.232536	0.274186	0.283556	0.232704	no	no	no	no
YKL010C::chr11_1	YKL010C	UFD4	-0.0829928	0.00378921	0.614268	0.51656	no	no	no	no
YKL011C::chr11_1	YKL011C	CCE1	0.290315	0.136921	0.232604	0.367558	no	no	no	no
YKL012W::chr11_1	YKL012W	PRP40	0.429501	-0.0916279	0.13331	0.623151	no	no	no	no
YKL013C::chr11_1	YKL013C	ARC19	0.525787	0.60432	0.0846955	0.0472715	no	no	no	no
YKL014C::chr11_1	YKL014C	URB1	0.468123	0.290673	0.1119	0.218576	no	no	no	no
YKL015W::chr11_1	YKL015W	PUT3	-0.0111703	-0.114487	0.537474	0.647651	no	no	no	no
YKL017C::chr11_1	YKL017C	HCS1	-0.302901	0.24694	0.813741	0.257125	no	no	no	no
YKL018W::chr11_1	YKL018W	SWD2	-0.51782	-1.56844	0.930488	0.999997	no	no	no	no
YKL019W::chr11_1	YKL019W	RAM2	-0.111289	-0.397545	0.643501	0.882308	no	no	no	no
YKL021C::chr11_1	YKL021C	MAK11	0.00303322	-0.0482758	0.522024	0.575375	no	no	no	no
YKL023W::chr11_1	YKL023W	YKL023W	0.226784	0.215768	0.288907	0.286618	no	no	no	no
YKL024C::chr11_1	YKL024C	URA6	-0.290888	0.173254	0.804807	0.329247	no	no	no	no
YKL025C::chr11_1	YKL025C	PAN3	0.0769162	-0.493813	0.441649	0.92803	no	no	no	no
YKL026C::chr11_1	YKL026C	GPX1	-0.466595	-0.622612	0.909774	0.966283	no	no	no	no
YKL027W::chr11_1	YKL027W	YKL027W	-0.126293	-0.27082	0.658678	0.795324	no	no	no	no
YKL028W::chr11_1	YKL028W	TFA1	0.0649487	0.0606711	0.454593	0.451936	no	no	no	no
YKL029C::chr11_1	YKL029C	MAE1	-0.00595715	0.0156606	0.531809	0.503052	no	no	no	no
YKL030W::chr00_12	YKL030W	YKL030W	0.570042	0.558018	0.0674348	0.0618047	yes	no	yes	no
YKL031W::chr11_1	YKL031W	YKL031W	0.50307	0.158241	0.0947523	0.344889	no	no	no	no
YKL033W-A::chr00_3	YKL033W-A	YKL033W-A	0.150399	0.465176	0.364026	0.101172	no	no	no	no
YKL033W::chr11_1	YKL033W	TTI1	-0.0431897	0.231866	0.572061	0.271188	no	no	no	no
YKL036C::chr11_1	YKL036C	YKL036C	-0.215257	-0.138495	0.742837	0.672739	no	no	no	no
YKL037W::chr11_1	YKL037W	AIM26	-0.0672948	-0.0799999	0.597753	0.610487	no	no	no	no
YKL038W::chr11_1	YKL038W	RGT1	1.24696	0.617761	0.000409764	0.0436092	no	no	yes	no
YKL040C::chr11_1	YKL040C	NFU1	0.207495	0.174303	0.307188	0.328165	no	no	no	no
YKL041W::chr11_1	YKL041W	VPS24	0.344744	0.365398	0.189666	0.161034	no	no	no	no
YKL043W::chr11_1	YKL043W	PHD1	-0.373345	-0.267163	0.860903	0.792349	no	no	no	no
YKL045W::chr11_1	YKL045W	PRI2	0.634604	0.0889258	0.0472909	0.420198	no	no	no	no
YKL046C::chr11_1	YKL046C	DCW1	-0.265601	-0.171248	0.785171	0.705725	no	no	no	no
YKL047W::chr11_1	YKL047W	YKL047W	1.86827	-2.04495	2.26781e-07	1	yes	no	yes	no
YKL048C::chr11_1	YKL048C	ELM1	0.52058	0.233931	0.0869269	0.269239	no	no	no	no
YKL052C::chr11_1	YKL052C	ASK1	0.140926	0.253508	0.373797	0.251119	no	no	no	no
YKL053W::chr11_1	YKL053W	YKL053W	0.137178	0.443053	0.377685	0.112798	no	no	no	no
YKL054C::chr11_1	YKL054C	DEF1	-0.737301	-0.293925	0.981218	0.813524	no	no	no	no
YKL055C::chr11_1	YKL055C	OAR1	-0.26153	-0.385671	0.781906	0.875489	no	no	no	no
YKL056C::chr11_1	YKL056C	TMA19	0.0891931	0.149179	0.428436	0.354462	no	no	no	no
YKL060C::chr11_1	YKL060C	FBA1	-0.417207	-0.251683	0.885768	0.779479	no	no	no	no
YKL061W::chr11_1	YKL061W	BLI1	-0.490405	-0.38207	0.919911	0.873367	no	no	no	no
YKL067W::chr11_1	YKL067W	YNK1	-0.284435	-0.420923	0.799903	0.894953	no	no	no	no
YKL069W::chr11_1	YKL069W	YKL069W	-0.183935	0.622509	0.714464	0.0423716	no	yes	no	yes
YKL070W::chr11_1	YKL070W	YKL070W	0.201638	0.33671	0.312837	0.181843	no	no	no	no
YKL071W::chr11_1	YKL071W	YKL071W	-0.484817	-0.329047	0.917613	0.839199	no	no	no	no
YKL072W::chr11_1	YKL072W	STB6	0.0699031	0.100269	0.449228	0.407588	no	no	no	no
YKL074C::chr11_1	YKL074C	MUD2	0.0822863	0.00304203	0.435861	0.51741	no	no	no	no
YKL075C::chr11_1	YKL075C	YKL075C	-0.41614	0.150788	0.885203	0.352755	no	no	no	no
YKL076C::chr11_1	YKL076C	PSY1	0.185613	0.207795	0.32852	0.294411	no	no	no	no
YKL077W::chr11_1	YKL077W	YKL077W	0.394824	-0.0561366	0.154799	0.584143	no	no	no	no
YKL078W::chr11_1	YKL078W	DHR2	0.0731264	-0.0619384	0.445742	0.590587	no	no	no	no
YKL079W::chr11_1	YKL079W	SMY1	-0.373201	-0.0763791	0.860816	0.606519	no	no	no	no
YKL080W::chr11_1	YKL080W	VMA5	0.0994823	0.156663	0.417422	0.346548	no	no	no	no
YKL082C::chr00_12	YKL082C	RRP14	0.236836	0.363551	0.279588	0.162325	no	no	no	no
YKL084W::chr11_1	YKL084W	HOT13	0.0325933	0.0323094	0.489791	0.484106	no	no	no	no
YKL086W::chr11_1	YKL086W	SRX1	-0.117478	-0.0925831	0.649791	0.624185	no	no	no	no
YKL089W::chr11_1	YKL089W	MIF2	0.470506	0.0203615	0.110664	0.497702	yes	no	yes	no
YKL092C::chr11_1	YKL092C	BUD2	0.0922368	0.360054	0.425171	0.164788	no	no	no	no
YKL093W::chr11_1	YKL093W	MBR1	-0.138582	-0.281233	0.670922	0.803654	no	no	no	no
YKL094W::chr11_1	YKL094W	YJU3	-0.360011	-0.0116003	0.852664	0.534041	no	no	no	no
YKL095W::chr11_1	YKL095W	YJU2	0.601751	0.400966	0.056839	0.137483	yes	no	yes	no
YKL097C::chr11_2	YKL097C	YKL097C	-1.03977	-0.469787	0.998173	0.918149	no	no	no	no
YKL098W::chr11_2	YKL098W	MTC2	-0.529476	-0.205736	0.934645	0.738699	no	no	no	no
YKL099C::chr11_2	YKL099C	UTP11	-0.0509711	-0.0916069	0.580394	0.623128	no	no	no	no
YKL100C::chr11_2	YKL100C	YKL100C	0.128698	0.57386	0.386528	0.0564835	no	no	no	no
YKL101W::chr11_2	YKL101W	HSL1	0.481911	0.372422	0.104886	0.156186	yes	no	yes	no
YKL103C::chr11_2	YKL103C	APE1	-0.0739017	0.127696	0.604727	0.377518	no	no	no	no
YKL104C::chr11_2	YKL104C	GFA1	-0.00288532	-0.223743	0.528467	0.755128	no	no	no	no
YKL105C::chr11_2	YKL105C	YKL105C	-0.160589	-0.295557	0.69239	0.814771	no	no	no	no
YKL106W::chr11_2	YKL106W	AAT1	-0.0515587	-0.392219	0.581022	0.879283	no	no	no	no
YKL107W::chr11_2	YKL107W	YKL107W	0.150932	0.324771	0.363479	0.190978	no	no	no	no
YKL109W::chr11_2	YKL109W	HAP4	0.0365586	0.0344448	0.485467	0.481678	no	no	no	no
YKL110C::chr11_2	YKL110C	KTI12	0.369024	0.204324	0.172198	0.297833	no	no	no	no
YKL115C::chr00_14	YKL115C	YKL115C	-0.621413	-1.09125	0.961024	0.999227	no	no	no	no
YKL116C::chr11_2	YKL116C	PRR1	-0.375255	-0.00520101	0.862058	0.526778	no	no	no	no
YKL117W::chr11_2	YKL117W	SBA1	0.230873	0.445616	0.285098	0.111404	no	no	no	no
YKL118W::chr11_2	YKL118W	YKL118W	0.350136	0.441713	0.185696	0.113532	no	no	no	no
YKL121W::chr11_2	YKL121W	DGR2	0.0898614	0.0513231	0.427719	0.462515	no	no	no	no
YKL122C::chr11_2	YKL122C	SRP21	0.106502	0.171898	0.409945	0.330648	no	no	no	no
YKL123W::chr11_2	YKL123W	YKL123W	0.565023	0.533737	0.0692435	0.0707105	no	no	no	no
YKL124W::chr11_2	YKL124W	SSH4	-0.33316	0.210476	0.835097	0.29178	no	no	no	no
YKL125W::chr11_2	YKL125W	RRN3	-0.0148779	-0.217089	0.541498	0.749123	no	no	no	no
YKL126W::chr11_2	YKL126W	YPK1	-0.231937	-0.330063	0.757326	0.839905	no	no	no	no
YKL128C::chr11_2	YKL128C	PMU1	-0.0628561	-0.251374	0.59305	0.779217	no	no	no	no
YKL129C::chr11_2	YKL129C	MYO3	-0.0733492	-0.0481182	0.604145	0.575198	no	no	no	no
YKL130C::chr11_2	YKL130C	SHE2	0.0434139	0.0962953	0.477997	0.411995	no	no	no	no
YKL132C::chr11_2	YKL132C	RMA1	0.0382011	0.130471	0.483677	0.374512	no	no	no	no
YKL136W::chr11_2	YKL136W	YKL136W	0.606485	0.548937	0.0553762	0.065027	no	no	no	no
YKL138C::chr11_2	YKL138C	MRPL31	0.494875	0.397662	0.0985882	0.139566	no	no	no	no
YKL139W::chr11_2	YKL139W	CTK1	-0.131497	-0.237405	0.663885	0.767212	no	no	no	no
YKL141W::chr11_2	YKL141W	SDH3	-0.236921	-0.579038	0.761568	0.955851	no	no	no	no
YKL143W::chr11_2	YKL143W	LTV1	0.753613	0.387232	0.022906	0.146282	no	no	no	no
YKL144C::chr11_2	YKL144C	RPC25	-0.118799	0.0836641	0.651127	0.426075	no	no	no	no
YKL145W::chr11_2	YKL145W	RPT1	-0.502119	-0.380659	0.92457	0.872529	no	no	no	no
YKL146W::chr11_2	YKL146W	AVT3	0.351693	0.140214	0.184559	0.364024	no	no	no	no
YKL147C::chr11_2	YKL147C	YKL147C	-0.0860793	-0.160656	0.617492	0.695225	no	no	no	no
YKL149C::chr11_2	YKL149C	DBR1	0.0898553	-0.0723737	0.427725	0.602117	no	no	no	no
YKL150W::chr11_2	YKL150W	MCR1	-0.551741	-0.701592	0.942046	0.980018	no	no	no	no
YKL151C::chr11_2	YKL151C	YKL151C	-0.000598598	0.0317813	0.525979	0.484707	no	no	no	no
YKL152C::chr11_2	YKL152C	GPM1	0.146708	0.162381	0.367823	0.340548	no	no	no	no
YKL154W::chr11_2	YKL154W	SRP102	0.304662	0.292887	0.22079	0.216717	no	no	no	no
YKL155C::chr11_2	YKL155C	RSM22	-0.243938	-0.235428	0.767471	0.765484	no	no	no	no
YKL159C::chr11_2	YKL159C	RCN1	0.203144	-0.306605	0.311381	0.823072	no	no	no	no
YKL161C::chr11_2	YKL161C	KDX1	0.301019	0.545264	0.223757	0.066367	no	no	no	no
YKL162C-A::chr00_3	YKL162C-A	YKL162C-A	0.179928	0.352506	0.334158	0.170185	no	no	no	no
YKL165C::chr11_2	YKL165C	MCD4	-0.623496	-0.356422	0.961502	0.857527	no	no	no	no
YKL167C::chr11_2	YKL167C	MRP49	-1.09595	-1.22775	0.998894	0.999811	no	no	no	no
YKL169C::chr11_2	YKL169C	YKL169C	0.281974	0.195335	0.239631	0.306781	no	no	no	no
YKL170W::chr11_2	YKL170W	MRPL38	-0.0983604	-0.283877	0.630237	0.805736	no	no	no	no
YKL171W::chr11_2	YKL171W	NNK1	0.318695	0.259455	0.209574	0.245745	no	no	no	no
YKL173W::chr11_2	YKL173W	SNU114	-0.334412	-0.361899	0.835946	0.861017	no	no	no	no
YKL176C::chr11_2	YKL176C	LST4	0.328012	-0.120364	0.202316	0.653857	no	no	no	no
YKL179C::chr11_2	YKL179C	COY1	-0.245878	0.0150033	0.769088	0.503801	no	no	no	no
YKL180W::chr11_2	YKL180W	RPL17A	-0.0449215	-0.123058	0.573919	0.656688	no	no	no	no
YKL181W::chr11_2	YKL181W	PRS1	0.509841	0.196099	0.0916669	0.306016	no	no	no	no
YKL184W::chr11_2	YKL184W	SPE1	-0.169694	-0.428669	0.701088	0.898918	no	no	no	no
YKL185W::chr11_2	YKL185W	ASH1	0.0852493	-0.286911	0.432672	0.808108	no	no	no	no
YKL186C::chr11_2	YKL186C	MTR2	-0.121267	-0.319257	0.653621	0.832285	no	no	no	no
YKL189W::chr11_2	YKL189W	HYM1	0.0513996	0.174925	0.469305	0.327524	no	no	no	no
YKL196C::chr11_3	YKL196C	YKT6	0.314623	0.0778914	0.212794	0.432542	no	no	no	no
YKL197C::chr11_3	YKL197C	PEX1	0.183291	0.339256	0.330818	0.179931	no	no	no	no
YKL201C::chr00_14	YKL201C	MNN4	0.741154	0.196827	0.02482	0.305289	yes	no	yes	no
YKL202W::chr00_14	YKL202W	YKL202W	-0.603014	-0.0954831	0.956587	0.627321	no	no	no	no
YKL203C::chr11_3	YKL203C	TOR2	-0.233719	-0.103917	0.758847	0.636392	no	no	no	no
YKL204W::chr00_14	YKL204W	EAP1	0.319964	0.298604	0.208577	0.21196	no	no	no	no
YKL209C::chr00_14	YKL209C	STE6	0.0829603	-0.310463	0.435135	0.825915	no	no	no	no
YKL211C::chr11_3	YKL211C	TRP3	0.0482186	0.202029	0.472766	0.300107	no	no	no	no
YKL213C::chr11_3	YKL213C	DOA1	0.504645	0.283015	0.0940278	0.225076	no	no	no	no
YKL214C::chr11_3	YKL214C	YRA2	-0.009044	-0.0379371	0.535164	0.563786	no	no	no	no
YKL217W::chr11_3	YKL217W	JEN1	-0.211554	-0.220829	0.739561	0.752507	no	no	no	no
YKL218C::chr11_3	YKL218C	SRY1	-0.884832	-0.819633	0.993485	0.991597	no	no	no	no
YKL222C::chr11_3	YKL222C	YKL222C	-0.214376	-0.310583	0.74206	0.826003	no	no	no	no
YKR001C::chr11_3	YKR001C	VPS1	-0.368684	-0.210522	0.858059	0.74312	no	no	no	no
YKR002W::chr11_3	YKR002W	PAP1	-0.00369631	0.405786	0.52935	0.134482	no	no	no	no
YKR003W::chr11_3	YKR003W	OSH6	-0.926514	-0.613189	0.995297	0.964218	no	no	no	no
YKR005C::chr11_3	YKR005C	YKR005C	0.104131	0.0226269	0.412467	0.495123	no	no	no	no
YKR009C::chr11_3	YKR009C	FOX2	0.0548746	0.194809	0.465527	0.307308	no	no	no	no
YKR011C::chr11_3	YKR011C	YKR011C	-0.833047	-0.984907	0.990394	0.997898	no	no	no	no
YKR012C::chr11_3	YKR012C	YKR012C	0.323637	0.194245	0.205706	0.307874	no	no	no	no
YKR014C::chr11_3	YKR014C	YPT52	-0.704637	-0.136077	0.976719	0.670244	no	no	no	no
YKR015C::chr11_3	YKR015C	YKR015C	0.0535615	-0.272824	0.466954	0.796943	no	no	no	no
YKR022C::chr11_3	YKR022C	NTR2	-0.322153	-0.135714	0.82752	0.669869	no	no	no	no
YKR024C::chr11_3	YKR024C	DBP7	0.6598	0.270015	0.0408765	0.236357	no	no	no	no
YKR025W::chr11_3	YKR025W	RPC37	0.457442	0.872421	0.117558	0.0074079	no	no	no	no
YKR026C::chr11_3	YKR026C	GCN3	0.841417	0.484211	0.0126364	0.0918888	no	no	no	no
YKR027W::chr00_14	YKR027W	BCH2	0.167744	-0.0163503	0.346368	0.539425	no	no	no	no
YKR030W::chr11_3	YKR030W	GMH1	0.0872179	-0.115153	0.430557	0.648357	no	no	no	no
YKR033C::chr11_3	YKR033C	YKR033C	-0.155152	-0.279134	0.687144	0.801992	no	no	no	no
YKR034W::chr00_14	YKR034W	DAL80	-0.0395714	-0.00891841	0.568175	0.530999	no	no	no	no
YKR035C::chr11_3	YKR035C	OPI8	2.63788	0.416827	4.35798e-13	0.127779	yes	no	yes	no
YKR038C::chr00_14	YKR038C	KAE1	0.461924	0.345035	0.115159	0.175638	no	no	no	no
YKR039W::chr00_14	YKR039W	GAP1	0.644761	0.178624	0.0446143	0.323723	no	no	no	no
YKR040C::chr00_14	YKR040C	YKR040C	0.302266	0.0726177	0.222739	0.438467	no	no	no	no
YKR042W::chr11_3	YKR042W	UTH1	-0.330015	0.132903	0.832955	0.371885	no	no	no	no
YKR043C::chr11_3	YKR043C	SHB17	0.0609249	0.228303	0.458957	0.274567	no	no	no	no
YKR045C::chr11_3	YKR045C	YKR045C	0.353291	-0.197897	0.183396	0.731373	no	no	no	no
YKR047W::chr11_3	YKR047W	YKR047W	-0.128618	-0.223172	0.661008	0.754615	no	no	no	no
YKR048C::chr11_3	YKR048C	NAP1	-0.281181	-0.0908324	0.797402	0.622288	no	no	no	no
YKR051W::chr11_3	YKR051W	YKR051W	-0.329222	-0.112496	0.832412	0.64554	no	no	no	no
YKR056W::chr11_3	YKR056W	TRM2	0.134061	0.194676	0.380929	0.307442	no	no	no	no
YKR057W::chr11_3	YKR057W	RPS21A	0.332568	-1.07984	0.198823	0.999136	no	no	no	no
YKR058W::chr11_3	YKR058W	GLG1	0.225654	0.0378962	0.289964	0.477754	no	no	no	no
YKR061W::chr11_3	YKR061W	KTR2	0.348327	1.19052	0.187022	0.000412234	no	no	no	yes
YKR063C::chr11_3	YKR063C	LAS1	0.409114	0.153628	0.145681	0.34975	no	no	no	no
YKR064W::chr11_3	YKR064W	OAF3	0.048958	0.093989	0.471961	0.414558	no	no	no	no
YKR065C::chr11_3	YKR065C	PAM17	-0.434129	-0.274986	0.894459	0.798682	no	no	no	no
YKR068C::chr00_3	YKR068C	BET3	0.352696	0.526649	0.183829	0.0734878	no	yes	no	yes
YKR073C::chr00_3	YKR073C	YKR073C	0.527925	0.623145	0.083792	0.042208	no	no	no	no
YKR074W::chr00_3	YKR074W	AIM29	-0.387924	-0.929598	0.869547	0.996581	no	no	no	no
YKR075C::chr00_3	YKR075C	YKR075C	-0.170191	-0.15439	0.70156	0.688937	no	no	no	no
YKR078W::chr00_3	YKR078W	YKR078W	-0.193667	-0.410834	0.723437	0.889622	no	no	no	no
YKR082W::chr00_3	YKR082W	NUP133	0.271744	0.408927	0.248405	0.132551	no	no	no	no
YKR084C::chr00_3	YKR084C	HBS1	-0.643527	-0.210641	0.965861	0.743229	no	no	no	no
YKR088C::chr00_4	YKR088C	TVP38	-0.505364	-0.346696	0.925824	0.851184	no	no	no	no
YKR089C::chr00_4	YKR089C	TGL4	-0.508298	-0.41576	0.926943	0.892249	no	no	no	no
YKR090W::chr00_4	YKR090W	PXL1	0.786168	0.389006	0.0184831	0.145125	no	no	no	no
YKR092C::chr00_4	YKR092C	SRP40	0.48485	-0.122178	0.103434	0.655764	no	no	no	no
YKR093W::chr00_4	YKR093W	PTR2	-0.202296	-0.071888	0.731276	0.601582	no	no	no	no
YKR094C::chr00_15	YKR094C	RPL40B	-0.272273	0.34433	0.79046	0.176158	no	no	no	no
YKR096W::chr00_15	YKR096W	YKR096W	0.106802	0.337424	0.409626	0.181306	no	no	no	no
YKR098C::chr00_4	YKR098C	UBP11	0.441159	0.281256	0.126569	0.226585	no	no	no	no
YKR100C::chr00_4	YKR100C	SKG1	-0.196379	-0.0569568	0.725913	0.585055	no	no	no	no
YKR104W::chr00_4	YKR104W	YKR104W	0.539455	0.146529	0.0790432	0.357279	no	no	no	no
YKR105C::chr00_4	YKR105C	VBA5	0.252767	-0.00923327	0.265124	0.531356	no	no	no	no
YLL005C::chr12_1	YLL005C	SPO75	0.239176	0.128037	0.277439	0.377148	no	no	no	no
YLL010C::chr12_1	YLL010C	PSR1	0.0164179	-0.191376	0.507434	0.725202	no	no	no	no
YLL012W::chr12_1	YLL012W	YEH1	0.522555	0.324191	0.0860755	0.191428	no	no	no	no
YLL013C::chr12_1	YLL013C	PUF3	0.046275	0.442447	0.474881	0.11313	no	no	no	no
YLL014W::chr12_1	YLL014W	EMC6	-0.72735	-1.3032	0.979933	0.999919	no	no	no	no
YLL015W::chr12_1	YLL015W	BPT1	0.223669	0.571395	0.291824	0.0572866	no	no	no	no
YLL016W::chr12_1	YLL016W	SDC25	0.785275	0.117553	0.0185939	0.388562	no	no	no	no
YLL018C-A::chr00_4	YLL018C-A	COX19	-0.564438	-0.400892	0.945962	0.884182	no	no	no	no
YLL019C::chr12_1	YLL019C	KNS1	-0.62112	-0.467207	0.960956	0.91703	no	no	no	no
YLL023C::chr12_1	YLL023C	POM33	0.453592	0.429474	0.119646	0.12039	no	no	no	no
YLL025W::chr12_1	YLL025W	PAU17	-0.072727	-0.493415	0.603489	0.927874	no	no	no	no
YLL026W::chr12_1	YLL026W	HSP104	-0.0126914	0.00150248	0.539125	0.519161	no	no	no	no
YLL027W::chr12_1	YLL027W	ISA1	-0.059229	-0.165272	0.589198	0.699822	no	no	no	no
YLL028W::chr12_1	YLL028W	TPO1	0.59252	0.183943	0.0597787	0.318288	no	no	no	no
YLL029W::chr12_1	YLL029W	FRA1	-0.726625	-0.867287	0.979836	0.994246	no	no	no	no
YLL030C::chr00_8	YLL030C	RRT7	0.0891974	0.105076	0.428431	0.402273	no	no	no	no
YLL031C::chr12_1	YLL031C	GPI13	0.377234	0.358504	0.166531	0.165887	no	no	no	no
YLL035W::chr12_1	YLL035W	GRC3	0.346092	0.421196	0.188669	0.125192	no	no	no	no
YLL036C::chr12_1	YLL036C	PRP19	0.134002	-0.0629216	0.38099	0.591677	no	no	no	no
YLL037W::chr12_1	YLL037W	YLL037W	-0.178465	0.341384	0.70936	0.178343	no	no	no	no
YLL040C::chr12_1	YLL040C	VPS13	0.158555	-0.278582	0.355684	0.801553	no	no	no	no
YLL042C::chr12_1	YLL042C	ATG10	0.185639	0.105672	0.328494	0.401615	no	no	no	no
YLL043W::chr12_1	YLL043W	FPS1	-0.765837	-0.93912	0.984521	0.996851	no	no	no	no
YLL045C::chr12_1	YLL045C	RPL8B	-0.179676	-0.124951	0.710493	0.658673	no	no	no	no
YLL046C::chr12_1	YLL046C	RNP1	-0.166528	-0.266223	0.698076	0.791581	no	no	no	no
YLL049W::chr00_8	YLL049W	LDB18	0.47247	0.38644	0.109653	0.146801	no	no	no	no
YLL051C::chr12_1	YLL051C	FRE6	-0.0717187	0.0244061	0.602426	0.493098	no	no	no	no
YLL052C::chr12_1	YLL052C	AQY2	-0.370288	-0.450828	0.859043	0.909655	no	no	no	no
YLL054C::chr12_1	YLL054C	YLL054C	0.587612	0.108525	0.0613893	0.39847	no	no	no	no
YLL056C::chr12_1	YLL056C	YLL056C	-0.347564	-0.412079	0.844683	0.890291	no	no	no	no
YLL058W::chr12_1	YLL058W	YLL058W	-0.448599	-0.578084	0.901502	0.955596	no	no	no	no
YLL059C::chr00_8	YLL059C	YLL059C	0.0827834	0.429651	0.435325	0.120289	no	no	no	no
YLL061W::chr12_1	YLL061W	MMP1	0.799364	0.686178	0.0169096	0.0283599	no	no	no	no
YLR006C::chr12_1	YLR006C	SSK1	0.215962	-0.336546	0.2991	0.844366	no	no	no	no
YLR008C::chr12_1	YLR008C	PAM18	-0.373317	-0.118218	0.860886	0.651596	no	no	no	no
YLR011W::chr12_1	YLR011W	LOT6	-0.0152668	0.2013	0.54192	0.300831	no	no	no	no
YLR012C::chr12_1	YLR012C	YLR012C	0.307652	-0.0603263	0.218372	0.588799	no	no	no	no
YLR013W::chr12_1	YLR013W	GAT3	0.270206	0.601988	0.249739	0.0479311	no	no	no	no
YLR015W::chr12_1	YLR015W	BRE2	0.423019	-0.261492	0.137162	0.787687	no	no	no	no
YLR017W::chr12_1	YLR017W	MEU1	-0.200201	-0.121319	0.729383	0.654862	no	no	no	no
YLR018C::chr12_1	YLR018C	POM34	0.159997	-0.15569	0.354216	0.690246	no	no	no	no
YLR019W::chr12_1	YLR019W	PSR2	-0.0920304	0.0972502	0.623684	0.410935	no	no	no	no
YLR020C::chr12_1	YLR020C	YEH2	0.0416702	0.00162075	0.479896	0.519026	no	no	no	no
YLR021W::chr12_1	YLR021W	IRC25	-0.568413	-0.74244	0.947144	0.985021	no	no	no	no
YLR022C::chr12_1	YLR022C	SDO1	-0.308941	-0.594576	0.818136	0.959835	no	no	no	no
YLR024C::chr12_1	YLR024C	UBR2	-0.248223	-0.187318	0.771035	0.721327	no	no	no	no
YLR025W::chr12_1	YLR025W	SNF7	0.490057	0.68166	0.100896	0.0292073	no	no	no	no
YLR026C::chr12_1	YLR026C	SED5	0.130721	0.378997	0.384413	0.151736	no	no	no	no
YLR027C::chr12_1	YLR027C	AAT2	-0.0920493	0.134565	0.623704	0.370093	no	no	no	no
YLR048W::chr12_2	YLR048W	RPS0B	0.493226	0.48898	0.0993733	0.0896652	yes	no	yes	no
YLR055C::chr12_2	YLR055C	SPT8	0.526649	0.292233	0.0843302	0.217265	yes	no	yes	no
YLR056W::chr12_2	YLR056W	ERG3	0.591831	0.412368	0.0600027	0.130458	no	no	no	no
YLR057W::chr12_2	YLR057W	MNL2	0.586059	0.776054	0.061906	0.015313	no	no	no	no
YLR063W::chr12_2	YLR063W	YLR063W	0.228591	0.0138775	0.287221	0.505082	no	no	no	no
YLR064W::chr12_2	YLR064W	PER33	0.516957	0.465599	0.0885049	0.100958	no	no	no	no
YLR065C::chr12_2	YLR065C	ENV10	0.479683	0.0671557	0.105998	0.444617	no	no	no	no
YLR069C::chr12_2	YLR069C	MEF1	0.493226	0.00913425	0.0993733	0.51048	yes	no	yes	no
YLR071C::chr12_2	YLR071C	RGR1	0.0478153	-0.0397595	0.473205	0.565833	yes	no	yes	no
YLR074C::chr12_2	YLR074C	BUD20	-0.0073156	-0.659549	0.533285	0.973453	no	no	no	no
YLR077W::chr12_2	YLR077W	FMP25	0.0576586	-0.234979	0.462502	0.76509	no	no	no	no
YLR078C::chr12_2	YLR078C	BOS1	0.51283	0.660365	0.0903286	0.0334895	no	no	no	no
YLR085C::chr12_2	YLR085C	ARP6	0.962215	0.840952	0.00512153	0.00946101	no	no	no	no
YLR090W::chr12_2	YLR090W	XDJ1	0.108963	-0.294882	0.407331	0.814256	no	no	no	no
YLR091W::chr12_2	YLR091W	GEP5	0.200461	0.0479172	0.313978	0.466376	no	no	no	no
YLR097C::chr12_2	YLR097C	HRT3	-1.13679	-0.825637	0.999243	0.991981	no	no	no	no
YLR098C::chr12_2	YLR098C	CHA4	0.372628	0.580689	0.169695	0.0543037	no	yes	no	yes
YLR100W::chr12_2	YLR100W	ERG27	0.727071	0.524404	0.027143	0.0743848	no	no	no	no
YLR102C::chr12_2	YLR102C	APC9	0.683051	0.683051	0.0356016	0.0289443	yes	yes	yes	yes
YLR105C::chr12_2	YLR105C	SEN2	0.485524	0.114047	0.103103	0.392402	no	no	no	no
YLR113W::chr12_2	YLR113W	HOG1	0.680704	0.667129	0.0361073	0.0320766	no	no	no	no
YLR120C::chr12_2	YLR120C	YPS1	0.261561	0.0164251	0.257306	0.502182	no	no	no	no
YLR136C::chr12_3	YLR136C	TIS11	0.796202	0.380056	0.0172758	0.151027	no	no	no	no
YLR146C::chr00_12	YLR146C	SPE4	-0.083938	-0.0485766	0.615256	0.575711	no	no	no	no
YLR153C::chr00_12	YLR153C	ACS2	-0.177543	-0.19645	0.708495	0.73001	no	no	no	no
YLR182W::chr12_3	YLR182W	SWI6	0.151438	0.0347168	0.36296	0.481368	yes	no	yes	no
YLR186W::chr00_11	YLR186W	EMG1	0.357867	0.464041	0.180094	0.101747	no	no	no	no
YLR191W::chr12_3	YLR191W	PEX13	-0.0701831	-0.142752	0.600806	0.67711	no	no	no	no
YLR192C::chr00_11	YLR192C	HCR1	-0.0465159	0.254024	0.575627	0.25065	no	no	no	no
YLR203C::chr12_3	YLR203C	MSS51	-0.401619	-0.184665	0.877321	0.718779	no	no	no	no
YLR215C::chr00_11	YLR215C	CDC123	0.336972	0.226657	0.195481	0.276135	no	no	no	no
YLR237W::chr00_11	YLR237W	THI7	-0.141349	-0.136878	0.673654	0.671072	no	no	no	no
YLR244C::chr12_4	YLR244C	MAP1	0.145899	0.263188	0.368657	0.242404	no	no	no	no
YLR246W::chr00_11	YLR246W	ERF2	0.541205	0.161297	0.0783408	0.341682	no	no	no	no
YLR250W::chr12_4	YLR250W	SSP120	0.517391	0.48286	0.0883149	0.0925261	no	no	no	no
YLR253W::chr12_4	YLR253W	YLR253W	0.527936	0.19568	0.0837872	0.306436	no	no	no	no
YLR257W::chr12_4	YLR257W	YLR257W	-0.48926	-0.424603	0.919444	0.89685	no	no	no	no
YLR271W::chr12_4	YLR271W	YLR271W	0.428387	0.106974	0.133966	0.400179	no	no	no	no
YLR272C::chr12_4	YLR272C	YCS4	0.151564	0.373084	0.362831	0.155734	no	no	no	no
YLR273C::chr12_4	YLR273C	PIG1	-0.484415	-0.583102	0.917446	0.956922	no	no	no	no
YLR274W::chr12_4	YLR274W	MCM5	0.551852	0.580689	0.074168	0.0543037	no	yes	no	yes
YLR277C::chr12_4	YLR277C	YSH1	0.491395	0.405748	0.100251	0.134505	no	no	no	no
YLR278C::chr12_4	YLR278C	YLR278C	-0.168407	-0.0016648	0.699866	0.522761	no	no	no	no
YLR279W::chr12_4	YLR279W	YLR279W	-0.580234	-0.846484	0.950538	0.993197	no	no	no	no
YLR287C::chr12_4	YLR287C	YLR287C	0.5672	-0.221043	0.0684544	0.7527	no	no	no	no
YLR289W::chr12_4	YLR289W	GUF1	0.283546	-0.062545	0.238298	0.59126	no	no	no	no
YLR292C::chr12_4	YLR292C	SEC72	0.475939	-0.36905	0.107884	0.865486	no	no	no	no
YLR295C::chr12_4	YLR295C	ATP14	-0.739357	-1.44537	0.981474	0.999985	no	no	no	no
YLR297W::chr12_4	YLR297W	YLR297W	0.810723	0.259019	0.0156483	0.246137	no	no	no	no
YLR299W::chr12_4	YLR299W	ECM38	-0.209145	-0.497075	0.737418	0.929298	no	no	no	no
YLR305C::chr12_4	YLR305C	STT4	-0.386428	-0.333619	0.868677	0.842362	no	no	no	no
YLR308W::chr12_4	YLR308W	CDA2	0.134833	-0.254718	0.380124	0.782038	no	no	no	no
YLR310C::chr12_4	YLR310C	CDC25	0.675159	1.88588	0.0373257	4.95321e-08	no	no	no	yes
YLR313C::chr12_4	YLR313C	SPH1	-0.160184	-0.852898	0.692001	0.993537	no	no	no	no
YLR316C::chr12_4	YLR316C	TAD3	0.154913	0.171347	0.359401	0.331218	no	no	no	no
YLR317W::chr12_4	YLR317W	YLR317W	-0.069866	0.314545	0.600471	0.199021	no	no	no	no
YLR318W::chr12_4	YLR318W	EST2	-0.0323364	-0.275646	0.560386	0.799211	no	no	no	no
YLR319C::chr12_4	YLR319C	BUD6	-0.0937913	-0.536692	0.625511	0.94336	no	no	no	no
YLR320W::chr12_4	YLR320W	MMS22	-0.307386	-0.449239	0.817011	0.908914	no	no	no	no
YLR322W::chr12_4	YLR322W	VPS65	0.0802326	0.247862	0.438073	0.256278	no	no	no	no
YLR323C::chr12_4	YLR323C	CWC24	0.402966	0.343925	0.149559	0.176458	no	no	no	no
YLR324W::chr12_5	YLR324W	PEX30	-0.54341	-1.58921	0.939358	0.999998	no	no	no	no
YLR325C::chr12_5	YLR325C	RPL38	0.000753098	-0.204826	0.524507	0.737854	no	no	no	no
YLR328W::chr12_5	YLR328W	NMA1	-0.518041	-0.461685	0.930568	0.914596	no	no	no	no
YLR334C::chr00_11	YLR334C	YLR334C	-0.222097	-0.273904	0.748832	0.797813	no	no	no	no
YLR337C::chr12_5	YLR337C	VRP1	0.088209	0.341443	0.429492	0.178299	no	no	no	no
YLR340W::chr12_5	YLR340W	RPP0	-0.538153	0.000461951	0.937612	0.520344	no	no	no	no
YLR343W::chr00_12	YLR343W	GAS2	0.223537	0.16921	0.291948	0.333432	no	no	no	no
YLR345W::chr12_5	YLR345W	YLR345W	-0.62771	-0.723979	0.962455	0.982912	no	no	no	no
YLR347C::chr12_5	YLR347C	KAP95	-0.26978	-0.489559	0.788493	0.926351	no	no	no	no
YLR348C::chr12_5	YLR348C	DIC1	0.00100592	0.498464	0.524232	0.0853622	no	no	no	no
YLR352W::chr12_5	YLR352W	YLR352W	-0.203734	-0.0592765	0.732572	0.587633	no	no	no	no
YLR353W::chr12_5	YLR353W	BUD8	-0.419488	0.0795651	0.886968	0.430665	no	no	no	no
YLR355C::chr12_5	YLR355C	ILV5	0.313817	0.437301	0.213435	0.115971	no	no	no	no
YLR357W::chr12_5	YLR357W	RSC2	0.291638	0.271063	0.2315	0.235436	no	no	no	no
YLR358C::chr00_11	YLR358C	YLR358C	-1.05464	-0.828697	0.998397	0.99217	no	no	no	no
YLR359W::chr12_5	YLR359W	ADE13	-0.262055	-0.499013	0.782328	0.930043	no	no	no	no
YLR361C::chr00_11	YLR361C	DCR2	0.470506	0.37559	0.110664	0.154031	yes	no	yes	no
YLR367W::chr12_5	YLR367W	RPS22B	-0.274095	-0.313736	0.791892	0.828303	no	no	no	no
YLR370C::chr00_11	YLR370C	ARC18	-0.105458	0.344578	0.637538	0.175975	no	no	no	no
YLR374C::chr12_5	YLR374C	YLR374C	-0.143724	-0.624501	0.675992	0.966685	no	no	no	no
YLR375W::chr12_5	YLR375W	STP3	-0.416289	-0.792807	0.885282	0.989676	no	no	no	no
YLR376C::chr12_5	YLR376C	PSY3	-0.413613	-0.0827678	0.883858	0.613513	no	no	no	no
YLR378C::chr12_5	YLR378C	SEC61	0.0209946	-0.0107684	0.502442	0.533097	no	no	no	no
YLR379W::chr12_5	YLR379W	YLR379W	-0.0102861	0.0594878	0.536513	0.453273	no	no	no	no
YLR380W::chr12_5	YLR380W	CSR1	-0.00406507	-0.161579	0.529751	0.696147	no	no	no	no
YLR384C::chr12_5	YLR384C	IKI3	0.206953	0.169384	0.307708	0.333252	no	no	no	no
YLR385C::chr12_5	YLR385C	SWC7	-0.511537	-0.0175067	0.928164	0.540734	no	no	no	no
YLR386W::chr12_5	YLR386W	VAC14	0.281889	0.267883	0.239703	0.238236	no	no	no	no
YLR387C::chr12_5	YLR387C	REH1	-0.184184	-0.190455	0.714695	0.724325	no	no	no	no
YLR388W::chr12_5	YLR388W	RPS29A	0.210216	0.26137	0.304578	0.244028	no	no	no	no
YLR389C::chr12_5	YLR389C	STE23	0.0597036	0.299011	0.460282	0.211624	no	no	no	no
YLR390W::chr12_5	YLR390W	ECM19	0.187977	0.00399244	0.326186	0.516329	no	no	no	no
YLR391W::chr12_5	YLR390W-A	CCW14	0.186818	0.463305	0.32733	0.10212	no	no	no	no
YLR392C::chr12_5	YLR392C	ART10	-0.151393	-0.112795	0.683494	0.645858	no	no	no	no
YLR394W::chr00_11	YLR394W	CST9	0.365751	0.0679071	0.174491	0.44377	no	no	no	no
YLR395C::chr12_5	YLR395C	COX8	0.815348	0.813265	0.0151584	0.0116625	no	no	no	no
YLR396C::chr12_5	YLR396C	VPS33	0.389202	0.30099	0.158488	0.209992	no	no	no	no
YLR397C::chr12_5	YLR397C	AFG2	-0.0673444	0.1745	0.597806	0.327962	no	no	no	no
YLR398C::chr12_5	YLR398C	SKI2	0.134629	0.0238811	0.380337	0.493696	no	no	no	no
YLR399C::chr12_5	YLR399C	BDF1	0.541743	0.0128475	0.0781256	0.506254	no	no	no	no
YLR400W::chr12_5	YLR400W	YLR400W	-0.0507553	-0.0608986	0.580163	0.589434	no	no	no	no
YLR403W::chr12_5	YLR403W	SFP1	-0.176045	0.400416	0.707088	0.137828	no	no	no	no
YLR404W::chr12_5	YLR404W	FLD1	-0.385293	0.0528537	0.868015	0.460781	no	no	no	no
YLR405W::chr12_5	YLR405W	DUS4	0.0772296	0.0563209	0.441311	0.456855	no	no	no	no
YLR406C::chr00_11	YLR406C	RPL31B	0.017003	0.145892	0.506796	0.357957	no	no	no	no
YLR408C::chr12_5	YLR408C	BLS1	0.119148	-0.0697182	0.396559	0.599191	no	no	no	no
YLR409C::chr12_5	YLR409C	UTP21	-0.0382739	-0.27436	0.56678	0.79818	no	no	no	no
YLR410W::chr12_5	YLR410W	VIP1	0.468805	0.0474976	0.111545	0.466852	no	no	no	no
YLR414C::chr12_5	YLR414C	PUN1	0.360949	-0.532927	0.17789	0.942126	no	no	no	no
YLR415C::chr12_5	YLR415C	YLR415C	-0.627872	0.0692711	0.962491	0.442233	no	no	no	no
YLR417W::chr12_5	YLR417W	VPS36	0.778704	0.600823	0.019427	0.0482636	no	no	no	no
YLR422W::chr00_4	YLR422W	YLR422W	0.591085	0.863916	0.060246	0.00791992	no	no	no	no
YLR423C::chr00_4	YLR423C	ATG17	0.0970211	-0.465883	0.420051	0.916451	no	no	no	no
YLR424W::chr00_4	YLR424W	SPP382	0.117928	0.12623	0.397845	0.379108	no	no	no	no
YLR426W::chr00_4	YLR426W	TDA5	-0.277061	-0.357614	0.794209	0.858292	no	no	no	no
YLR427W::chr00_4	YLR427W	MAG2	-0.382306	-0.212429	0.866261	0.74487	no	no	no	no
YLR433C::chr00_4	YLR433C	CNA1	0.156735	-0.211133	0.35754	0.743682	no	no	no	no
YLR434C::chr00_4	YLR434C	YLR434C	0.132323	0.165422	0.382741	0.337372	no	no	no	no
YLR438C-A::chr00_4	YLR438C-A	LSM3	0.0266317	-0.419546	0.496293	0.894237	no	no	no	no
YLR438W::chr00_4	YLR438W	CAR2	0.136256	-0.500648	0.378643	0.930667	no	no	no	no
YLR439W::chr00_15	YLR439W	MRPL4	0.566647	0.429324	0.0686543	0.120476	no	no	no	no
YLR442C::chr00_4/chr00_15	YLR442C	SIR3	-0.0807812	0.0477231	0.611953	0.466596	no	no	no	no
YLR447C::chr00_4	YLR447C	VMA6	0.465774	0.144742	0.113127	0.359183	no	no	no	no
YLR448W::chr00_4	YLR448W	RPL6B	0.709835	0.101569	0.0302306	0.40615	no	no	no	no
YLR458W::chr00_4	YLR458W	YLR458W	-0.325983	-0.436932	0.830182	0.903026	no	no	no	no
YLR459W::chr00_4	YLR459W	GAB1	1.86718	1.70385	2.30318e-07	7.58158e-07	no	no	yes	yes
YLR461W::chr00_4	YLR461W	PAU4	0.441669	0.346373	0.12628	0.174653	no	no	no	no
YML015C::chr00_11	YML015C	TAF11	0.18563	0.369797	0.328503	0.157987	no	no	no	no
YML036W::chr00_11	YML036W	CGI121	0.312268	0.268523	0.214669	0.237672	no	no	no	no
YML038C::chr00_11	YML038C	YMD8	0.517872	0.205856	0.0881043	0.296321	no	no	no	no
YML042W::chr00_11	YML042W	CAT2	-0.326221	0.3052	0.830346	0.206547	no	no	no	no
YML069W::chr00_15	YML069W	POB3	0.364369	0.527873	0.175465	0.0730023	no	no	no	no
YML072C::chr00_12	YML072C	TCB3	-0.327728	-0.293121	0.831385	0.812908	no	no	no	no
YML073C::chr00_18	YML073C	RPL6A	0.727071	1.28251	0.027143	0.000154934	no	no	no	yes
YML075C::chr00_11	YML075C	HMG1	0.129509	0.200544	0.38568	0.301581	no	no	no	no
YML076C::chr00_11	YML076C	WAR1	0.591259	0.474537	0.0601894	0.0965245	yes	no	yes	no
YML085C::chr00_12	YML085C	TUB1	0.844691	1.03239	0.0123468	0.00190633	no	yes	no	yes
YML086C::chr00_11	YML086C	ALO1	0.166251	0.139575	0.347876	0.364709	no	no	no	no
YML093W::chr00_9	YML093W	UTP14	-0.638353	-0.282794	0.964776	0.804885	no	no	no	no
YML094W::chr00_9	YML094W	GIM5	-0.0622152	-0.189728	0.59237	0.723632	no	no	no	no
YML095C-A::chr00_9	YML094C-A	YML094C-A	0.341896	0.0418947	0.191785	0.473212	no	no	no	no
YML096W::chr00_9	YML096W	YML096W	0.423964	0.156683	0.136596	0.346528	yes	no	yes	no
YML099C::chr00_9	YML099C	ARG81	-0.971112	-0.799817	0.996725	0.990212	no	no	no	no
YML100W::chr00_9	YML100W	TSL1	-0.133288	-0.227445	0.665669	0.758435	no	no	no	no
YML105C::chr00_9	YML105C	SEC65	0.194062	0.247327	0.320211	0.25677	no	no	no	no
YML114C::chr00_9	YML114C	TAF8	0.749185	1.123	0.0235715	0.000811301	no	no	no	yes
YML116W::chr00_9	YML116W	ATR1	-0.232477	-0.517853	0.757788	0.936975	no	no	no	no
YML117W::chr00_9	YML117W	NAB6	0.699212	0.968484	0.0322745	0.00335468	no	no	no	no
YML118W::chr00_9	YML118W	NGL3	0.485698	0.547308	0.103017	0.0656188	no	no	no	no
YML124C::chr00_9	YML124C	TUB3	-0.167859	0.407901	0.699344	0.133179	no	no	no	no
YML126C::chr00_9	YML126C	ERG13	-0.202394	-0.418713	0.731365	0.893802	no	no	no	no
YML129C::chr00_9	YML129C	COX14	0.481911	0.14486	0.104886	0.359057	yes	no	yes	no
YMR004W::chr00_9	YMR004W	MVP1	0.005152	0.137083	0.519716	0.367384	no	yes	no	yes
YMR037C::chr00_15	YMR037C	MSN2	0.0395772	0.0706296	0.482177	0.440704	no	no	no	no
YMR052W::chr00_5	YMR052W	FAR3	-0.407189	-0.3082	0.880388	0.824251	no	no	no	no
YMR053C::chr00_5	YMR053C	STB2	0.493566	0.619321	0.0992112	0.0431995	no	no	no	no
YMR054W::chr00_5	YMR054W	STV1	0.0313541	-0.0798027	0.491142	0.610271	no	no	no	no
YMR060C::chr00_4	YMR060C	SAM37	0.0597986	-0.262711	0.460179	0.788694	no	no	no	no
YMR073C::chr00_6	YMR073C	IRC21	0.100013	0.186371	0.416855	0.31582	no	no	no	no
YMR074C::chr00_15	YMR074C	YMR074C	-0.0915301	-0.484397	0.623165	0.924273	no	no	no	no
YMR076C::chr00_6	YMR076C	PDS5	-0.609334	-0.62677	0.958155	0.967162	no	no	no	no
YMR077C::chr00_6	YMR077C	VPS20	-0.151011	-0.493216	0.683122	0.927797	no	no	no	no
YMR079W::chr00_6	YMR079W	SEC14	-0.857534	-0.997719	0.991987	0.998128	no	no	no	no
YMR080C::chr00_6:dn,YPL004C::chr00_17b	NA	NA	0.287396	0.469887	0.23505	0.098813	no	no	no	no
YMR083W::chr00_6	YMR083W	ADH3	0.772059	0.098364	0.0203016	0.4097	no	no	no	no
YMR085W::chr00_6	YMR085W	YMR085W	-0.217294	-0.0466413	0.74463	0.573547	no	no	no	no
YMR086C-A::chr00_6	YMR086C-A	YMR086C-A	0.117972	0.280112	0.397798	0.227568	no	no	no	no
YMR094W::chr00_9	YMR094W	CTF13	-0.396225	-0.167775	0.874299	0.702301	no	no	no	no
YMR095C::chr00_9	YMR095C	SNO1	0.197315	0.202461	0.317037	0.299678	no	no	no	no
YMR100W::chr00_9	YMR100W	MUB1	-0.740774	-0.931095	0.981649	0.996625	no	no	no	no
YMR104C::chr00_15	YMR104C	YPK2	-0.045972	-0.309919	0.575044	0.825516	no	no	no	no
YMR106C::chr00_9	YMR106C	YKU80	-0.18609	0.243085	0.716462	0.260686	no	no	no	no
YMR107W::chr00_9	YMR107W	SPG4	-0.7866	-0.114798	0.986598	0.647981	no	no	no	no
YMR108W::chr00_9/chr00_15	YMR108W	ILV2	0.559316	0.27267	0.0713456	0.234028	yes	no	yes	no
YMR116C::chr00_9	YMR116C	ASC1	-0.253671	-0.445074	0.775522	0.906952	no	no	no	no
YMR118C::chr00_15	YMR118C	SHH3	1.0774	-0.0676881	0.00197284	0.59695	no	no	no	no
YMR119W-A::chr00_9	YMR119W-A	YMR119W-A	0.32004	0.334795	0.208517	0.183289	no	no	no	no
YMR120C::chr00_9	YMR120C	ADE17	0.0276992	0.320579	0.495128	0.194251	no	no	no	no
YMR121C::chr00_9	YMR121C	RPL15B	-0.756164	-0.951298	0.983462	0.997168	no	no	no	no
YMR124W::chr00_9	YMR124W	YMR124W	-0.293143	-0.517259	0.806504	0.936765	no	no	no	no
YMR130W::chr00_9	YMR130W	YMR130W	-0.0202893	0.0700936	0.547365	0.441307	no	no	no	no
YMR131C::chr00_9	YMR131C	RRB1	0.669938	0.979882	0.0385034	0.00303979	no	no	no	no
YMR132C::chr00_9	YMR132C	JLP2	-0.0367634	-0.0881629	0.565155	0.61939	no	no	no	no
YMR134W::chr00_9	YMR134W	YMR134W	0.191672	0.15338	0.322553	0.350012	no	no	no	no
YMR137C::chr00_11	YMR137C	PSO2	-0.113849	-0.137018	0.646108	0.671216	no	no	no	no
YMR140W::chr13_4	YMR140W	SIP5	-0.104002	0.28621	0.636044	0.222351	no	no	no	no
YMR144W::chr13_4	YMR144W	YMR144W	-0.189133	0.0319806	0.719273	0.48448	no	no	no	no
YMR148W::chr13_4	YMR148W	OSW5	0.548769	1.13914	0.0753584	0.000692258	no	no	no	yes
YMR149W::chr13_4	YMR149W	SWP1	-0.633128	-0.382676	0.963651	0.873726	no	no	no	no
YMR150C::chr13_4	YMR150C	IMP1	0.0620412	0.0302952	0.457746	0.486397	no	no	no	no
YMR151W::chr13_4	YMR151W	YIM2	0.0933375	-0.105241	0.423992	0.637808	no	no	no	no
YMR152W::chr13_4	YMR152W	YIM1	-0.0780893	-0.438855	0.60913	0.903964	no	no	no	no
[truncated: 776 more rows]

## Sheet: flight
Strain	ORF	Gene	Log2ratio, 14G	Log2ratio, 21G	P, 14G	P, 21G	Drops out, 14G	Drops out, 21G	Significant, 14G	Significant, 21G
YAL001C::chr1_1	YAL001C	TFC3	0.580115	-0.734728	0.0999165	0.931304	no	no	no	no
YAL003W::chr1_1	YAL003W	EFB1	0.0457783	0.222788	0.426555	0.342028	no	no	no	no
YAL004W::chr1_1	YAL004W	YAL004W	-0.419885	0.172162	0.779574	0.37947	no	no	no	no
YAL007C::chr1_1	YAL007C	ERP2	0.435725	0.912295	0.162158	0.0383863	no	no	no	no
YAL008W::chr1_1	YAL008W	FUN14	-0.767809	0.502311	0.931224	0.168678	no	no	no	no
YAL009W::chr1_1	YAL009W	SPO7	0.383932	0.334434	0.189617	0.265133	no	no	no	no
YAL010C::chr1_1	YAL010C	MDM10	-0.590931	0.364807	0.869042	0.245842	no	no	no	no
YAL011W::chr1_1	YAL011W	SWC3	-0.189766	0.0428793	0.617289	0.479523	no	no	no	no
YAL013W::chr1_1	YAL013W	DEP1	-0.707373	-1.08585	0.913228	0.985355	no	no	no	no
YAL014C::chr1_1	YAL014C	SYN8	0.114746	0.328281	0.371938	0.269132	no	no	no	no
YAL015C::chr1_1	YAL015C	NTG1	0.132163	-0.14334	0.358497	0.624267	no	no	no	no
YAL017W::chr1_1	YAL017W	PSK1	0.848709	1.36481	0.0333721	0.00385967	no	no	no	no
YAL018C::chr1_1	YAL018C	YAL018C	-0.941838	-0.0502302	0.967278	0.552776	no	no	no	no
YAL019W::chr1_1	YAL019W	FUN30	-0.652331	-1.08265	0.893969	0.985119	no	no	no	no
YAL020C::chr1_1	YAL020C	ATS1	0.201897	0.90086	0.306558	0.0403077	no	no	no	no
YAL021C::chr1_1	YAL021C	CCR4	-0.806908	1.17216	0.941235	0.011205	no	no	no	no
YAL022C::chr1_1	YAL022C	FUN26	0.225272	1.50158	0.289922	0.00167079	no	yes	no	yes
YAL023C::chr1_1	YAL023C	PMT2	0.321196	0.212804	0.226469	0.349303	no	no	no	no
YAL024C::chr00_17a	YAL024C	LTE1	0.01752	-0.635193	0.449414	0.901273	no	no	no	no
YAL025C::chr1_1	YAL025C	MAK16	0.473199	-0.335632	0.143992	0.757026	no	no	no	no
YAL026C::chr1_1	YAL026C	DRS2	0.584231	1.11969	0.0984426	0.0146418	no	no	no	no
YAL027W::chr1_1	YAL027W	SAW1	-0.182152	-0.313265	0.611312	0.74298	no	no	no	no
YAL028W::chr1_1	YAL028W	FRT2	0.635471	0.334434	0.0814082	0.265133	no	no	no	no
YAL029C::chr1_1	YAL029C	MYO4	-0.124702	-0.28372	0.565453	0.723799	no	no	no	no
YAL030W::chr1_1	YAL030W	SNC1	-0.684342	-1.18268	0.905514	0.991128	no	no	no	no
YAL031C::chr1_1	YAL031C	GIP4	-0.848729	0.00223727	0.950639	0.511559	no	no	no	no
YAL032C::chr1_1	YAL032C	PRP45	-1.65608	-0.805118	0.999531	0.947886	no	no	no	no
YAL033W::chr1_1	YAL033W	POP5	0.385737	0.0428793	0.188615	0.479523	no	no	no	no
YAL034C::chr1_1	YAL034C	FUN19	0.0861764	0.743319	0.394319	0.0755368	no	no	no	no
YAL034W-A::chr1_1	YAL034W-A	MTW1	1.17846	1.07006	0.00603156	0.0186917	no	no	no	no
YAL035C-A::chr1_1	YAL034C-B	YAL034C-B	-0.4528	-0.120619	0.799075	0.607113	no	no	no	no
YAL035W::chr1_1	YAL035W	FUN12	-0.360791	-0.199094	0.741975	0.665275	no	no	no	no
YAL036C::chr1_1	YAL036C	RBG1	-0.218678	0.480285	0.639724	0.179868	no	no	no	no
YAL037W::chr1_1	YAL037W	YAL037W	-0.684342	-0.394185	0.905514	0.791746	no	no	no	no
YAL038W::chr1_1	YAL038W	CDC19	-1.02838	-0.944128	0.978301	0.971247	no	no	no	no
YAL039C::chr1_1	YAL039C	CYC3	0.0257405	-0.175761	0.442743	0.648319	no	no	no	no
YAL040C::chr1_1	YAL040C	CLN3	-0.374797	-0.428742	0.751177	0.810786	no	no	no	no
YAL041W::chr1_1	YAL041W	CDC24	-0.374797	-0.535657	0.751177	0.862608	no	no	no	no
YAL042W::chr1_1	YAL042W	ERV46	0.00753591	-0.0502302	0.457534	0.552776	no	no	no	no
YAL045C::chr1_1	YAL045C	YAL045C	-0.696726	-0.722655	0.909722	0.92809	no	no	no	no
YAL046C::chr1_1	YAL046C	AIM1	-0.393534	-1.24817	0.763209	0.993797	no	no	no	no
YAL048C::chr1_1	YAL048C	GEM1	0.266749	0.257892	0.261491	0.316924	no	no	no	no
YAL049C::chr1_1	YAL049C	AIM2	0.219443	0.743319	0.294031	0.0755368	no	no	no	no
YAL051W::chr1_1	YAL051W	OAF1	0.0688092	0.45227	0.408103	0.194757	no	no	no	no
YAL053W::chr1_1	YAL053W	FLC2	-0.967373	-1.14977	0.970929	0.989441	no	no	no	no
YAL054C::chr00_12	YAL054C	ACS1	0.210165	-0.442548	0.300626	0.818083	no	no	no	no
YAL055W::chr1_1	YAL055W	PEX22	0.00113104	0.0710761	0.462753	0.457363	no	no	no	no
YAL056W::chr1_1	YAL056W	GPB2	-0.816307	-1.55273	0.943463	0.99904	no	no	no	no
YAL058C-A::chr00_12	YAL056C-A	YAL056C-A	0.125276	0.016884	0.363791	0.500012	no	no	no	no
YAL058W::chr1_1	YAL058W	CNE1	-0.157567	-0.488351	0.591837	0.841009	no	no	no	no
YAL059W::chr1_1	YAL059W	ECM1	-0.374797	-0.313265	0.751177	0.74298	no	no	no	no
YAL060W::chr1_1	YAL060W	BDH1	-0.148289	-0.458315	0.584425	0.826198	no	no	no	no
YAL061W::chr1_1	YAL061W	BDH2	0.128064	-0.425739	0.361645	0.809176	no	no	no	no
YAL062W::chr1_1	YAL062W	GDH3	-0.0122273	0.793651	0.473658	0.0623638	no	no	no	no
YAL064C-A::chr00_1	YAL064C-A	TDA8	-0.0769976	-0.872232	0.526662	0.96057	no	no	no	no
YAL065C::chr1_1	YAL065C	YAL065C	-1.35031	-1.5962	0.996327	0.999284	no	no	no	no
YAL066W::chr1_1	YAL066W	YAL066W	0.540314	1.23928	0.115007	0.0078461	no	no	no	no
YAL067C::chr1_1	YAL067C	SEO1	-1.57119	-0.805118	0.999138	0.947886	no	no	no	no
YAL068C::chr1_1	YAL068C	PAU8	0.280554	-0.242875	0.252356	0.696177	no	no	no	no
YAR002C-A::chr00_16a	YAR002C-A	ERP1	0.333796	0.772892	0.218759	0.0675616	no	no	no	no
YAR003W::chr1_1	YAR003W	SWD1	0.660285	0.930405	0.0740045	0.0354967	no	no	no	no
YAR007C::chr1_1	YAR007C	RFA1	-0.599557	0.315898	0.87277	0.277272	no	no	no	no
YAR008W::chr1_1	YAR008W	SEN34	0.665845	-0.298158	0.0724186	0.733259	no	no	no	no
YAR014C::chr1_1	YAR014C	BUD14	-0.562424	-0.836827	0.85619	0.954233	no	no	no	no
YAR015W::chr1_1	YAR015W	ADE1	-0.32035	0.271698	0.714449	0.30727	no	no	no	no
YAR019C::chr1_1	YAR019C	CDC15	0.510674	0.328281	0.127251	0.269132	no	no	no	no
YAR020C::chr1_1	YAR020C	PAU7	-0.4528	0.686735	0.799075	0.0927658	no	no	no	no
YAR023C::chr1_1	YAR023C	YAR023C	0.0469347	0.11688	0.425625	0.421675	no	no	no	no
YAR027W::chr1_1	YAR027W	UIP3	-0.185764	0.153303	0.614151	0.393734	no	no	no	no
YAR028W::chr1_1	YAR028W	YAR028W	-0.441071	-0.32707	0.792247	0.751699	no	no	no	no
YAR029W::chr1_1	YAR029W	YAR029W	0.494573	0.644915	0.13427	0.107255	no	no	no	no
YAR030C::chr1_1	YAR030C	YAR030C	-0.121959	-0.209887	0.563235	0.673008	no	no	no	no
YAR031W::chr1_1	YAR031W	PRM9	0.200181	-0.220155	0.307796	0.680297	no	no	no	no
YAR035W::chr1_1	YAR035W	YAT1	-0.123445	-0.135622	0.564437	0.618465	no	no	no	no
YAR037W::chr1_1	not found	YAR037W	0.385737	0.0428793	0.188615	0.479523	no	no	no	no
YAR040C::chr1_1	not found	YAR040C	1.10123	0.282345	0.00934228	0.299914	no	no	no	no
YAR042W::chr1_1	YAR042W	SWH1	-0.714428	-0.272623	0.915494	0.716417	no	no	no	no
YAR043C::chr1_1	deleted	YAR043C	-1.33416	-1.05023	0.995946	0.982534	no	no	no	no
YAR047C::chr1_1	YAR047C	YAR047C	0.136164	-0.55719	0.355433	0.871743	no	no	no	no
YAR050W::chr00_12	YAR050W	FLO1	-0.148289	-0.256681	0.584425	0.705651	no	no	no	no
YBL001C::chr2_1	YBL001C	ECM15	-0.178877	0.172162	0.608733	0.37947	no	no	no	no
YBL003C::chr2_1	YBL003C	HTA2	-1.11584	-0.136773	0.986075	0.619333	no	no	no	no
YBL004W::chr2_1	YBL004W	UTP20	-0.652331	-0.876201	0.893969	0.961234	no	no	no	no
YBL007C::chr2_1	YBL007C	SLA1	-0.185764	0.0277724	0.614151	0.491427	no	no	no	no
YBL008W::chr2_1	YBL008W	HIR1	-0.204872	-1.05023	0.629066	0.982534	no	no	no	no
YBL009W::chr2_1	YBL009W	ALK2	-0.648791	1.58904	0.892632	0.000944019	no	yes	no	yes
YBL012C::chr2_1	YBL012C	YBL012C	-1.77473	-0.957121	0.999809	0.972893	no	no	no	no
YBL013W::chr2_1	YBL013W	FMT1	-0.526801	-0.827838	0.838969	0.952501	no	no	no	no
YBL015W::chr2_1	YBL015W	ACH1	-0.492035	-0.766437	0.820916	0.939218	no	no	no	no
YBL016W::chr2_1	YBL016W	FUS3	-0.848729	0.0428793	0.950639	0.479523	no	no	no	no
YBL018C::chr2_1	YBL018C	POP8	-0.459686	0.502311	0.80302	0.168678	no	no	no	no
YBL020W::chr2_1	YBL020W	RFT1	-0.719446	-0.149766	0.917079	0.629076	no	no	no	no
YBL024W::chr2_1	YBL024W	NCL1	0.165077	-0.564803	0.333581	0.87487	no	no	no	no
YBL026W::chr2_1	YBL026W	LSM2	-0.0122273	0.101773	0.473658	0.433389	no	no	no	no
YBL028C::chr2_1	YBL028C	YBL028C	0.303274	-0.0946243	0.237696	0.587229	no	no	no	no
YBL029W::chr2_1	YBL029W	YBL029W	-0.61991	-0.313265	0.881271	0.74298	no	no	no	no
YBL031W::chr2_1	YBL031W	SHE1	-0.204872	-0.313265	0.629066	0.74298	no	no	no	no
YBL034C::chr2_1	YBL034C	STU1	-0.470217	-0.256681	0.808961	0.705651	no	no	no	no
YBL035C::chr2_1	YBL035C	POL12	-0.40127	0.142415	0.768081	0.402037	no	no	no	no
YBL036C::chr2_1	YBL036C	YBL036C	-0.136854	1.74951	0.575249	0.000308016	no	yes	no	yes
YBL037W::chr2_1	YBL037W	APL3	0.200181	0.490338	0.307796	0.174703	no	no	no	no
YBL038W::chr2_1	YBL038W	MRPL16	-0.419885	0.364807	0.779574	0.245842	no	no	no	no
YBL039C::chr2_1	YBL039C	URA7	-0.816307	0.212804	0.943463	0.349303	no	no	no	no
YBL048W::chr2_1	YBL048W	RRT1	1.11706	0.838739	0.00855697	0.0521512	no	no	no	no
YBL049W::chr2_1	YBL049W	MOH1	-0.848729	0.086543	0.950639	0.445259	no	yes	no	yes
YBL050W::chr2_1	YBL050W	SEC17	-0.919118	1.50158	0.963719	0.00167079	no	yes	no	yes
YBL051C::chr2_1	YBL051C	PIN4	-0.154832	0.502311	0.589655	0.168678	no	no	no	no
YBL052C::chr2_1	YBL052C	SAS3	-1.18977	-0.0502302	0.990642	0.552776	no	no	no	no
YBL053W::chr2_1	YBL053W	YBL053W	0.058162	-0.0502302	0.416611	0.552776	no	no	no	no
YBL054W::chr2_1	YBL054W	TOD6	-0.0886794	0.297693	0.536199	0.289453	no	no	no	no
YBL055C::chr2_1	YBL055C	YBL055C	0.0137679	0.50158	0.452463	0.169041	no	yes	no	yes
YBL056W::chr2_1	YBL056W	PTC3	-1.30441	0.308935	0.995152	0.281901	no	yes	no	yes
YBL057C::chr2_1	YBL057C	PTH2	-0.0413737	-0.330338	0.497508	0.753739	no	no	no	no
YBL059W::chr2_1	YBL059W	YBL059W	-1.84873	-1.14977	0.999894	0.989441	no	no	no	no
YBL060W::chr2_1	YBL060W	YEL1	-1.4654	-0.857585	0.998233	0.958041	no	no	no	no
YBL061C::chr2_1	YBL061C	SKT5	-0.111763	0.364807	0.554977	0.245842	no	no	no	no
YBL062W::chr2_1	YBL062W	YBL062W	0.428805	0.194882	0.165669	0.362502	no	no	no	no
YBL063W::chr2_1	YBL063W	KIP1	0.653772	-0.302617	0.0758962	0.736148	no	no	no	no
YBL064C::chr2_1	YBL064C	PRX1	-0.526801	-0.465268	0.838969	0.829702	no	no	no	no
YBL066C::chr2_1	YBL066C	SEF1	-0.4528	-0.120619	0.799075	0.607113	no	no	no	no
YBL067C::chr2_1	YBL067C	UBP13	-0.315296	-0.497689	0.710914	0.84544	no	no	no	no
YBL068W::chr2_1	YBL068W	PRS4	-0.526801	-0.0502302	0.838969	0.552776	no	no	no	no
YBL070C::chr2_1	YBL070C	YBL070C	-0.178877	-1.14977	0.608733	0.989441	no	no	no	no
YBL071C::chr2_1	YBL071C	YBL071C	-0.0886794	0.94977	0.536199	0.0326065	no	no	no	no
YBL072C::chr2_1	YBL072C	RPS8A	-0.0573152	0.94977	0.510562	0.0326065	no	no	no	no
YBL074C::chr2_1	YBL074C	AAR2	0.193092	0.172162	0.312933	0.37947	no	no	no	no
YBL076C::chr2_1	YBL076C	ILS1	0.610703	0.502311	0.0893419	0.168678	no	no	no	no
YBL077W::chr2_1	YBL077W	YBL077W	-0.204872	-0.187734	0.629066	0.657059	no	no	no	no
YBL078C::chr2_1	YBL078C	ATG8	0.303274	0.557452	0.237696	0.142672	no	no	no	no
YBL079W::chr2_1	YBL079W	NUP170	-0.59719	-0.48319	0.871754	0.838524	no	no	no	no
YBL082C::chr2_1	YBL082C	ALG3	0.0206873	0.153303	0.446842	0.393734	no	no	no	no
YBL083C::chr2_1	YBL083C	YBL083C	-0.614263	-1.22016	0.878953	0.992757	no	no	no	no
YBL084C::chr2_1	YBL084C	CDC27	0.151271	-0.509662	0.34395	0.851	no	no	no	no
YBL085W::chr2_1	YBL085W	BOI1	1.00371	0.480285	0.015715	0.179868	no	no	no	no
YBL086C::chr2_1	YBL086C	YBL086C	0.0037142	-0.104678	0.460648	0.594948	no	no	no	no
YBL087C::chr2_1	YBL087C	RPL23A	-0.263766	-0.149766	0.673744	0.629076	no	no	no	no
YBL088C::chr2_1	YBL088C	TEL1	0.0257405	1.01688	0.442743	0.0240523	no	no	no	no
YBL089W::chr2_1	YBL089W	AVT5	0.0746501	0.364807	0.403453	0.245842	no	no	no	no
YBL090W::chr2_1	YBL090W	MRP21	0.932631	-0.175761	0.0224459	0.648319	no	no	no	no
YBL091C-A::chr00_1	YBL091C-A	SCS22	-0.526801	-0.538977	0.838969	0.864045	no	no	no	no
YBL091C::chr2_1	YBL091C	MAP2	-0.178877	-0.149766	0.608733	0.629076	no	no	no	no
YBL092W::chr2_1	YBL092W	RPL32	0.294862	0.364807	0.243068	0.245842	no	no	no	no
YBL093C::chr2_1	YBL093C	ROX3	-0.459686	-1.17576	0.80302	0.990795	no	no	no	no
YBL094C::chr2_1	YBL094C	YBL094C	-0.562424	-0.220155	0.85619	0.680297	no	no	no	no
YBL096C::chr2_2	YBL096C	YBL096C	0.385737	-0.0946243	0.188615	0.587229	no	no	no	no
YBL097W::chr2_2	YBL097W	BRN1	-0.111763	0.0528633	0.554977	0.471666	no	no	no	no
YBL098W::chr2_2	YBL098W	BNA4	-0.00213853	-0.635193	0.46542	0.901273	no	no	no	no
YBL099W::chr2_2	YBL099W	ATP1	-0.0923977	0.308224	0.53923	0.282377	no	no	no	no
YBL100C::chr2_2	YBL100C	YBL100C	-0.241398	-0.0502302	0.657026	0.552776	no	no	no	no
YBL101C::chr2_2	YBL101C	ECM21	-0.472353	-0.202233	0.810153	0.667532	no	no	no	no
YBL102W::chr2_2	YBL102W	SFT2	0.560662	0.867308	0.107101	0.0463999	no	no	no	no
YBL103C::chr2_2	YBL103C	RTG3	0.071101	-0.635193	0.406277	0.901273	no	no	no	no
YBL104C::chr2_2	YBL104C	SEA4	0.0382624	0.94977	0.432614	0.0326065	no	no	no	no
YBL105C::chr2_2	YBL105C	PKC1	0.373664	0.5872	0.195383	0.129832	no	no	no	no
YBL106C::chr2_2	YBL106C	SRO77	-0.728434	0.101773	0.919861	0.433389	no	no	no	no
YBL107C::chr2_2	YBL107C	YBL107C	-0.356876	0.212804	0.739372	0.349303	no	no	no	no
YBR001C::chr2_2	YBR001C	NTH2	0.0326269	1.30894	0.437168	0.00532963	no	yes	no	yes
YBR002C::chr2_2	YBR002C	RER2	-0.304408	0.297693	0.703227	0.289453	no	no	no	no
YBR003W::chr2_2	YBR003W	COQ1	-0.905312	-0.635193	0.961405	0.901273	no	no	no	no
YBR005W::chr2_2	YBR005W	RCR1	-0.315296	0.824239	0.710914	0.0552794	no	no	no	no
YBR007C::chr2_2	YBR007C	DSF2	0.183693	0.671505	0.319799	0.0978651	no	yes	no	yes
YBR008C::chr2_2	YBR008C	FLR1	0.110629	0.850234	0.375138	0.0497723	no	no	no	no
YBR009C::chr2_2	YBR009C	HHF1	-0.170657	0.194882	0.602238	0.362502	no	no	no	no
YBR010W::chr2_2	YBR010W	HHT1	-0.577427	-0.0757652	0.863056	0.572659	no	no	no	no
YBR011C::chr2_2	YBR011C	IPP1	-0.368103	0.0428793	0.746801	0.479523	no	no	no	no
YBR012C::chr2_2	YBR012C	YBR012C	-1.5268	-0.924699	0.998829	0.968631	no	no	no	no
YBR013C::chr2_2	YBR013C	YBR013C	-0.263766	-0.535657	0.673744	0.862608	no	no	no	no
YBR015C::chr2_2	YBR015C	MNN2	-1.24301	0.308935	0.993062	0.281901	no	yes	no	yes
YBR017C::chr2_2	YBR017C	KAP104	-0.941838	0.534732	0.967278	0.15304	no	no	no	no
YBR018C::chr2_2	YBR018C	GAL7	0.647229	1.1238	0.0778332	0.0143436	no	no	no	no
YBR020W::chr00_18	YBR020W	GAL1	-0.210773	-0.163887	0.633634	0.639573	no	no	no	no
YBR022W::chr2_2	YBR022W	POA1	-0.0793415	-0.313265	0.528577	0.74298	no	no	no	no
YBR023C::chr2_2	YBR023C	CHS3	-0.816307	-0.272623	0.943463	0.716417	no	no	no	no
YBR024W::chr2_2	YBR024W	SCO2	-0.4654	-0.957121	0.806257	0.972893	no	no	no	no
YBR025C::chr2_2	YBR025C	OLA1	1.58904	1.13034	0.000399503	0.013879	yes	no	yes	no
YBR028C::chr2_2	YBR028C	YPK3	-0.678804	-0.272623	0.903586	0.716417	no	no	no	no
YBR030W::chr2_2	YBR030W	RKM3	-1.35031	-1.5962	0.996327	0.999284	no	no	no	no
YBR031W::chr2_2	YBR031W	RPL4A	-0.304408	0.00223727	0.703227	0.511559	no	no	no	no
YBR032W::chr2_2	YBR032W	YBR032W	0.303274	1.04288	0.237696	0.0212892	no	no	no	no
YBR033W::chr2_2	YBR033W	EDS1	-0.384782	0.194882	0.757629	0.362502	no	no	no	no
YBR034C::chr2_2	YBR034C	HMT1	-0.806908	0.172162	0.941235	0.37947	no	no	no	no
YBR037C::chr2_2	YBR037C	SCO1	-0.835736	-0.944128	0.947855	0.971247	no	no	no	no
YBR039W::chr2_2	YBR039W	ATP3	-0.728434	-0.120619	0.919861	0.607113	no	no	no	no
YBR040W::chr2_2	YBR040W	FIG1	-0.111763	0.743319	0.554977	0.0755368	no	no	no	no
YBR041W::chr2_2	YBR041W	FAT1	-0.967373	-0.827838	0.970929	0.952501	no	no	no	no
YBR042C::chr2_2	YBR042C	CST26	-0.687265	-0.45462	0.90652	0.824318	no	no	no	no
YBR043C::chr2_2	YBR043C	QDR3	-0.263766	0.797767	0.673744	0.0613712	no	no	no	no
YBR045C::chr2_2	YBR045C	GIP1	0.219443	0.480285	0.294031	0.179868	no	no	no	no
YBR046C::chr2_2	YBR046C	ZTA1	0.351209	0.0599528	0.208357	0.466093	no	no	no	no
YBR047W::chr2_2	YBR047W	FMP23	-0.384782	1.04288	0.757629	0.0212892	no	no	no	no
YBR048W::chr2_2	YBR048W	RPS11B	-0.941838	-0.857585	0.967278	0.958041	no	no	no	no
YBR050C::chr2_2	YBR050C	REG2	-0.719446	-0.149766	0.917079	0.629076	no	no	no	no
YBR051W::chr2_2	YBR051W	YBR051W	-1.11584	-0.136773	0.986075	0.619333	no	no	no	no
YBR053C::chr2_2	YBR053C	YBR053C	-0.487813	-0.136773	0.81864	0.619333	no	no	no	no
YBR054W::chr2_2	YBR054W	YRO2	-0.526801	0.172162	0.838969	0.37947	no	no	no	no
YBR055C::chr2_2	YBR055C	PRP6	-0.368103	0.490338	0.746801	0.174703	no	no	no	no
YBR056W::chr2_2	YBR056W	YBR056W	-0.292335	0.227304	0.694597	0.338756	no	no	no	no
YBR057C::chr2_2	YBR057C	MUM2	-0.285792	-0.519715	0.689873	0.855565	no	no	no	no
YBR058C::chr2_2	YBR058C	UBP14	-0.642278	1.08654	0.890141	0.0172524	no	yes	no	yes
YBR059C::chr2_2	YBR059C	AKL1	-0.659251	0.158356	0.896547	0.389897	no	no	no	no
YBR061C::chr2_2	YBR061C	TRM7	-0.424921	0.502311	0.782626	0.168678	no	no	no	no
YBR062C::chr2_2	YBR062C	YBR062C	0.238734	1.13034	0.280537	0.013879	no	no	no	no
YBR063C::chr2_2	YBR063C	YBR063C	-0.411323	-0.635193	0.774329	0.901273	no	no	no	no
YBR064W::chr2_2	YBR064W	YBR064W	0.238734	0.644915	0.280537	0.107255	no	no	no	no
YBR065C::chr2_2	YBR065C	ECM2	1.38574	1.19488	0.00166347	0.00994934	no	no	no	no
YBR066C::chr2_2	YBR066C	NRG2	0.263746	0.364807	0.2635	0.245842	no	no	no	no
YBR067C::chr2_2	YBR067C	TIP1	-1.20487	0.823509	0.991394	0.0554409	no	yes	no	yes
YBR068C::chr2_2	YBR068C	BAP2	0.259075	0.838739	0.266642	0.0521512	no	no	no	no
YBR069C::chr2_2	YBR069C	TAT1	-0.696726	-0.0502302	0.909722	0.552776	no	no	no	no
YBR070C::chr2_2	YBR070C	ALG14	-1.33416	0.086543	0.995946	0.445259	no	yes	no	yes
YBR071W::chr2_2	YBR071W	YBR071W	0.0257405	-0.175761	0.442743	0.648319	no	no	no	no
YBR072W::chr2_2	YBR072W	HSP26	0.335696	-0.0137043	0.21761	0.524116	no	no	no	no
YBR073W::chr2_2	YBR073W	RDH54	-0.419885	0.172162	0.779574	0.37947	no	no	no	no
YBR074W::chr2_2	YBR074W	YBR074W	0.058162	0.364807	0.416611	0.245842	no	no	no	no
YBR075W::chr2_2	YBR074W	YBR074W	0.335696	-0.313265	0.21761	0.74298	no	no	no	no
YBR076W::chr2_2	YBR076W	ECM8	-0.642278	0.364807	0.890141	0.245842	no	no	no	no
YBR077C::chr2_2	YBR077C	SLM4	0.0137679	1.50158	0.452463	0.00167079	no	yes	no	yes
YBR078W::chr2_2	YBR078W	ECM33	-0.626336	0.850234	0.883869	0.0497723	no	no	no	no
YBR079C::chr2_2	YBR079C	RPG1	-0.467907	-0.161261	0.807667	0.637629	no	no	no	no
YBR080C::chr00_16a	YBR080C	SEC18	0.312735	0.644915	0.231732	0.107255	no	no	no	no
YBR081C::chr2_3	YBR081C	SPT7	-0.0852908	0.622605	0.533434	0.115622	no	no	no	no
YBR082C::chr2_3	YBR082C	UBC4	-0.0573152	0.0753007	0.510562	0.454052	no	no	no	no
YBR083W::chr00_16a	YBR083W	TEC1	-0.715834	0.838739	0.915941	0.0521512	no	no	no	no
YBR084C-A::chr00_16a	YBR084C-A	RPL19A	0.775762	1.25233	0.0461247	0.00730708	no	no	no	no
YBR084W::chr2_3	YBR084W	MIS1	0.213813	0.654314	0.298025	0.103865	no	no	no	no
YBR085W::chr2_3	YBR085W	AAC3	-0.127705	1.18424	0.567877	0.0105216	no	no	no	no
YBR086C::chr2_3	YBR086C	IST2	0.455921	-0.0150407	0.15219	0.525168	no	no	no	no
YBR087W::chr2_3/chr00_16a	YBR087W	RFC5	-0.554281	-0.0222158	0.852367	0.530811	no	no	no	no
YBR088C::chr00_16a	YBR088C	POL30	-0.366336	-0.294156	0.745639	0.730654	no	no	no	no
YBR089W::chr2_3	YBR089W	YBR089W	-0.318214	0.480285	0.712958	0.179868	no	no	no	no
YBR090C-A::chr2_3	YBR089C-A	NHP6B	-0.92535	-0.175761	0.964725	0.648319	no	no	no	no
YBR090C::chr00_16a	YBR090C	YBR090C	-1.57119	-1.54208	0.999138	0.998969	no	no	no	no
YBR091C::chr2_3	YBR091C	TIM12	-0.593915	-0.242875	0.87034	0.696177	no	no	no	no
YBR092C::chr2_3	YBR092C	PHO3	0.241874	-0.696593	0.278369	0.920759	no	no	no	no
YBR093C::chr2_3	YBR093C	PHO5	0.932631	0.016884	0.0224459	0.500012	no	no	no	no
YBR094W::chr2_3	YBR094W	PBY1	-0.24503	-0.0733138	0.659762	0.570757	no	no	no	no
YBR096W::chr2_3	YBR096W	YBR096W	-0.642278	-0.957121	0.890141	0.972893	no	no	no	no
YBR098W::chr2_3	YBR098W	MMS4	0.0861764	0.743319	0.394319	0.0755368	no	no	no	no
YBR099C::chr2_3	YBR099C	YBR099C	-0.419885	0.172162	0.779574	0.37947	no	no	no	no
YBR100W::chr2_3/chr00_16a	YBR098W	MMS4	0.0946879	-0.187734	0.387611	0.657059	no	no	no	no
YBR103W::chr2_3	YBR103W	SIF2	-0.707373	-0.815765	0.913228	0.950091	no	no	no	no
YBR104W::chr2_3	YBR104W	YMC2	-0.789835	0.201309	0.937014	0.357749	no	no	no	no
YBR106W::chr2_3	YBR106W	PHO88	-0.4654	-0.635193	0.806257	0.901273	no	no	no	no
YBR107C::chr2_3	YBR107C	IML3	-0.386623	-0.0502302	0.758808	0.552776	no	no	no	no
YBR111C::chr2_3	YBR111C	YSA1	-0.148289	-0.707342	0.584425	0.923848	no	no	no	no
YBR112C::chr00_16a	YBR112C	CYC8	0.0108563	0.271698	0.454831	0.30727	no	no	no	no
YBR115C::chr2_3	YBR115C	LYS2	-0.614263	0.50158	0.878953	0.169041	no	yes	no	yes
YBR117C::chr2_3	YBR117C	TKL2	-0.0573152	-1.16571	0.510562	0.990291	no	no	no	no
YBR119W::chr2_3	YBR119W	MUD1	0.243718	-0.169529	0.2771	0.643738	no	no	no	no
YBR120C::chr2_3	YBR120C	CBP6	-1.19831	-0.458701	0.991074	0.826394	no	no	no	no
YBR121C::chr00_16a	YBR121C	GRS1	0.907602	0.686735	0.0253336	0.0927658	no	no	no	no
YBR123C::chr2_3	YBR123C	TFC1	0.221661	-0.0502302	0.292464	0.552776	no	no	no	no
YBR124W::chr2_3	YBR124W	YBR124W	-0.295475	0.660263	0.696852	0.101759	no	no	no	no
YBR125C::chr00_16a	YBR125C	PTC4	0.0672071	0.294418	0.40938	0.291671	no	no	no	no
YBR128C::chr2_3	YBR128C	ATG14	0.580115	1.30894	0.0999165	0.00532963	no	yes	no	yes
YBR129C::chr2_3	YBR129C	OPY1	-0.526801	-1.05023	0.838969	0.982534	no	no	no	no
YBR130C::chr2_3	YBR130C	SHE3	-0.281688	1.04288	0.686894	0.0212892	no	no	no	no
YBR131W::chr00_16a	YBR131W	CCZ1	0.135504	-0.0100411	0.355938	0.521232	no	no	no	no
YBR132C::chr2_3	YBR132C	AGP2	-0.664304	0.51681	0.898401	0.161561	no	no	no	no
YBR134W::chr2_3	YBR134W	YBR134W	0.0425651	0.428938	0.429144	0.207713	no	no	no	no
YBR136W::chr2_3	YBR136W	MEC1	-0.614263	0.50158	0.878953	0.169041	no	yes	no	yes
YBR137W::chr2_3	YBR137W	YBR137W	2.40847	0.686735	2.38618e-07	0.0927658	yes	no	yes	no
YBR138C::chr2_3	YBR138C	YBR138C	0.425894	0.0237704	0.167161	0.494582	no	no	no	no
YBR139W::chr2_3	YBR139W	YBR139W	-0.551463	-0.300774	0.851029	0.734956	no	no	no	no
YBR140C::chr2_3	YBR140C	IRA1	-1.11176	-1.0137	0.985775	0.979173	no	no	no	no
YBR141C::chr2_3	YBR141C	YBR141C	0.33118	0.135326	0.220348	0.407466	no	no	no	no
YBR142W::chr2_3	YBR142W	MAK5	0.0137679	0.50158	0.452463	0.169041	no	yes	no	yes
YBR143C::chr2_3	YBR143C	SUP45	-0.526801	-0.0502302	0.838969	0.552776	no	no	no	no
YBR144C::chr2_3	YBR144C	YBR144C	0.151271	0.879381	0.34395	0.0441278	no	no	no	no
YBR145W::chr2_3	YBR145W	ADH5	-0.669758	-0.220155	0.900375	0.680297	no	no	no	no
YBR146W::chr2_3	YBR146W	MRPS9	-0.487272	0.574261	0.818348	0.135315	no	no	no	no
YBR147W::chr2_3	YBR147W	RTC2	0.563397	1.23928	0.106069	0.0078461	no	no	no	no
YBR150C::chr00_16a	YBR150C	TBS1	3.65133	1.34463	1.64255e-14	0.00434233	yes	no	yes	no
YBR151W::chr2_3	YBR151W	APD1	0.110629	0.5872	0.375138	0.129832	no	no	no	no
YBR152W::chr2_3	YBR152W	SPP381	-0.593915	-0.330338	0.87034	0.753739	no	no	no	no
YBR153W::chr2_3	YBR153W	RIB7	-0.276822	-0.263224	0.683347	0.710092	no	no	no	no
YBR154C::chr2_3	YBR154C	RPB5	0.888237	0.364807	0.0277759	0.245842	no	no	no	no
YBR157C::chr2_3	YBR157C	ICS2	-0.22724	0.50158	0.64628	0.169041	no	yes	no	yes
YBR161W::chr2_3	YBR161W	CSH1	0.580115	0.172162	0.0999165	0.37947	no	no	no	no
YBR162W-A::chr2_3	YBR162W-A	YSY6	-0.767809	-0.175761	0.931224	0.648319	no	no	no	no
YBR163W::chr2_3	YBR163W	EXO5	-0.848729	0.239276	0.950639	0.330141	no	no	no	no
YBR164C::chr2_3	YBR164C	ARL1	0.058162	0.601847	0.416611	0.123813	no	no	no	no
YBR165W::chr2_3	YBR165W	UBS1	-0.749193	0.086543	0.926017	0.445259	no	yes	no	yes
YBR166C::chr2_3	YBR166C	TYR1	-0.32035	-0.428742	0.714449	0.810786	no	no	no	no
YBR167C::chr2_3	YBR167C	POP7	-1.67224	-1.5962	0.999583	0.999284	no	no	no	no
YBR168W::chr00_16a	YBR168W	PEX32	-0.374797	-0.0502302	0.751177	0.552776	no	no	no	no
YBR169C::chr00_16a	YBR169C	SSE2	-0.848729	0.627842	0.950639	0.113617	no	no	no	no
YBR170C::chr2_3	YBR170C	NPL4	-0.304408	-0.685819	0.703227	0.917569	no	no	no	no
YBR171W::chr2_3	YBR171W	SEC66	-0.315296	-0.876201	0.710914	0.961234	no	no	no	no
YBR172C::chr2_3	YBR172C	SMY2	-0.304408	-0.242875	0.703227	0.696177	no	no	no	no
YBR173C::chr2_4	YBR173C	UMP1	0.497862	2.07753	0.132816	2.32283e-05	no	no	no	yes
YBR174C::chr2_4	YBR174C	YBR174C	0.136164	1.1533	0.355433	0.0123497	no	no	no	no
YBR175W::chr2_4	YBR175W	SWD3	0.228087	-0.403867	0.287947	0.797192	no	no	no	no
YBR176W::chr2_4	YBR176W	ECM31	-0.642278	-0.635193	0.890141	0.901273	no	no	no	no
YBR177C::chr2_4	YBR177C	EHT1	-0.919118	0.364807	0.963719	0.245842	no	no	no	no
YBR178W::chr2_4	YBR178W	YBR178W	0.183693	0.834293	0.319799	0.0530951	no	no	no	no
YBR179C::chr2_4	YBR179C	FZO1	-0.000731705	0.364807	0.464272	0.245842	no	no	no	no
YBR180W::chr2_4	YBR180W	DTR1	-0.427265	-0.635193	0.784038	0.901273	no	no	no	no
YBR181C::chr2_4	YBR181C	RPS6B	-0.0831939	0.644915	0.531723	0.107255	no	no	no	no
YBR182C::chr2_4	YBR182C	SMP1	-0.450179	0.763357	0.797561	0.0700587	no	no	no	no
YBR184W::chr2_4	YBR184W	YBR184W	-0.506042	-0.363891	0.828338	0.774161	no	no	no	no
YBR185C::chr2_4	YBR185C	MBA1	0.736234	0.94977	0.0545219	0.0326065	no	no	no	no
YBR186W::chr2_4	YBR186W	PCH2	0.0037142	-0.519715	0.460648	0.855565	no	no	no	no
YBR188C::chr2_4	YBR188C	NTC20	-0.170657	-0.220155	0.602238	0.680297	no	no	no	no
YBR189W::chr00_14	YBR189W	RPS9B	0.151271	0.0917889	0.34395	0.441164	no	no	no	no
YBR193C::chr2_4	YBR193C	MED8	-0.493634	0.364807	0.821773	0.245842	no	no	no	no
YBR194W::chr2_4	YBR194W	AIM4	-0.822256	0.016884	0.944838	0.500012	no	no	no	no
YBR195C::chr2_4	YBR195C	MSI1	0.385737	1.36481	0.188615	0.00385967	no	no	no	no
YBR196C::chr2_4	YBR196C	PGI1	-0.32035	0.464343	0.714449	0.188251	no	no	no	no
YBR197C::chr2_4	YBR197C	YBR197C	-2.27631	-0.136773	0.999998	0.619333	no	no	no	no
YBR199W::chr2_4	YBR199W	KTR4	-0.0518916	1.72236	0.506121	0.000374755	no	no	no	yes
YBR202W::chr2_4	YBR202W	MCM7	-0.0122273	0.686735	0.473658	0.0927658	no	no	no	no
YBR205W::chr2_4	YBR205W	KTR3	0.157698	0.156221	0.339109	0.391518	no	no	no	no
YBR212W::chr2_4	YBR212W	NGR1	0.44463	0.253776	0.157712	0.319827	no	no	no	no
YBR214W::chr2_4	YBR214W	SDS24	-0.474333	0.00223727	0.811253	0.511559	no	no	no	no
YBR216C::chr2_4	YBR216C	YBP1	0.117056	1.00866	0.370146	0.0249864	no	no	no	no
YBR217W::chr2_4	YBR217W	ATG12	-1.33416	0.0428793	0.995946	0.479523	no	no	no	no
YBR218C::chr2_4	YBR218C	PYC2	-1.43369	-0.805118	0.997827	0.947886	no	no	no	no
YBR219C::chr2_4	YBR219C	YBR219C	-1.43369	0.50158	0.997827	0.169041	no	yes	no	yes
YBR227C::chr2_4	YBR227C	MCX1	0.101231	-0.302617	0.382477	0.736148	no	no	no	no
YBR228W::chr2_4	YBR228W	SLX1	-0.480997	0.364807	0.814928	0.245842	no	no	no	no
YBR230C::chr2_4	YBR230C	OM14	-0.167258	-0.191586	0.599544	0.659854	no	no	no	no
YBR231C::chr2_4	YBR231C	SWC5	-0.0793415	0.101773	0.528577	0.433389	no	no	no	no
YBR233W::chr2_4	YBR233W	PBP2	-0.974259	-0.497689	0.971854	0.84544	no	no	no	no
YBR236C::chr2_4	YBR236C	ABD1	-0.604803	-0.272623	0.875	0.716417	no	no	no	no
YBR239C::chr2_4	YBR239C	ERT1	-0.178877	0.00223727	0.608733	0.511559	no	no	no	no
YBR240C::chr2_4	YBR240C	THI2	-0.263766	-0.202233	0.673744	0.667532	no	no	no	no
YBR242W::chr2_4	YBR242W	YBR242W	0.261695	-0.19462	0.264877	0.662049	no	no	no	no
YBR244W::chr2_4	YBR244W	GPX2	-0.313397	0.227304	0.70958	0.338756	no	no	no	no
YBR247C::chr2_4	YBR247C	ENP1	0.238734	0.282345	0.280537	0.299914	no	no	no	no
YBR248C::chr2_4	YBR248C	HIS7	-0.780557	-0.394185	0.934623	0.791746	no	no	no	no
YBR250W::chr2_4	YBR250W	SPO23	-0.0793415	0.101773	0.528577	0.433389	no	no	no	no
YBR251W::chr2_4	YBR251W	MRPS5	-0.389297	0.0872734	0.760516	0.444688	no	no	no	no
YBR254C::chr2_4	YBR254C	TRS20	-0.39674	-0.421068	0.765235	0.806653	no	no	no	no
YBR258C::chr2_4	YBR258C	SHG1	-1.11176	-0.734728	0.985775	0.931304	no	no	no	no
YBR259W::chr2_4	YBR259W	YBR259W	-0.255498	0.793651	0.667603	0.0623638	no	no	no	no
YBR262C::chr2_4	YBR262C	AIM5	-0.32035	0.608733	0.714449	0.121052	no	no	no	no
YBR265W::chr2_4	YBR265W	TSC10	-0.154832	0.824239	0.589655	0.0552794	no	no	no	no
YBR266C::chr2_4	YBR266C	SLM6	0.312735	-0.00716143	0.231732	0.518964	no	no	no	no
YBR268W::chr2_4	YBR268W	MRPL37	-0.331405	0.201309	0.722111	0.357749	no	no	no	no
YBR269C::chr00_1	YBR269C	FMP21	0.407611	-0.0162828	0.176726	0.526145	no	no	no	no
YBR270C::chr00_16a	YBR270C	BIT2	0.0387967	-0.425739	0.432183	0.809176	no	no	no	no
YBR271W::chr00_1	YBR271W	EFM2	-0.237294	0.016884	0.653923	0.500012	no	no	no	no
YBR273C::chr00_1	YBR273C	UBX7	-0.444338	1.2128	0.794163	0.00904734	no	no	no	no
YBR275C::chr00_16a	YBR275C	RIF1	-0.673642	-0.915301	0.901763	0.967297	no	no	no	no
YBR276C::chr00_16a	YBR276C	PPS1	0.406085	0.435197	0.177539	0.204188	no	no	no	no
YBR277C::chr00_1	YBR277C	YBR277C	0.85507	0.20611	0.0324134	0.354213	no	no	no	no
YBR278W::chr00_1	YBR278W	DPB3	0.473199	0.153303	0.143992	0.393734	no	no	no	no
YBR280C::chr00_16a	YBR280C	SAF1	0.339933	-0.0733138	0.21506	0.570757	no	no	no	no
YBR281C::chr00_1	YBR281C	DUG2	0.610703	-0.635193	0.0893419	0.901273	no	no	no	no
YBR282W::chr00_1	YBR282W	MRPL27	-1.67364	-1.14977	0.999588	0.989441	no	no	no	no
YBR284W::chr00_1	YBR284W	YBR284W	0.643124	-0.202233	0.0790673	0.667532	no	no	no	no
YBR285W::chr00_1	YBR285W	YBR285W	-0.263766	0.172162	0.673744	0.37947	no	no	no	no
YBR286W::chr00_1	YBR286W	APE3	0.762706	-0.497689	0.0487751	0.84544	no	no	no	no
YBR288C::chr00_16a	YBR288C	APM3	0.00607347	-0.717655	0.458725	0.926725	no	no	no	no
YBR289W::chr00_16a	YBR289W	SNF5	-0.880437	-0.272623	0.956934	0.716417	no	no	no	no
YBR290W::chr00_1	YBR290W	BSD2	0.406085	-0.490803	0.177539	0.84218	no	no	no	no
YBR291C::chr00_1	YBR291C	CTP1	0.671505	-1.05023	0.0708306	0.982534	yes	no	yes	no
YBR292C::chr00_1	YBR292C	YBR292C	0.411799	-0.503948	0.174505	0.848364	no	no	no	no
YBR294W::chr00_16a	YBR294W	SUL1	0.232191	-0.876201	0.28508	0.961234	no	no	no	no
YBR296C::chr00_1	YBR296C	PHO89	-1.93527	-2.3067	0.999948	0.999998	no	no	no	no
YBR301W::chr00_16a	YBR301W	PAU24	0.677213	-0.449326	0.0692567	0.8216	no	no	no	no
YCL001W-A::chr00_1	YCL001W-A	YCL001W-A	-0.239519	0.142415	0.655606	0.402037	no	no	no	no
YCL002C::chr3_1	YCL002C	YCL002C	0.710239	0.161274	0.0606736	0.387687	no	no	no	no
YCL003W::chr3_1	YCL004W	PGS1	0.704525	0.119695	0.0620959	0.4195	no	no	no	no
YCL011C::chr3_1	YCL011C	GBP2	-0.614263	-0.635193	0.878953	0.901273	no	no	no	no
YCL025C::chr3_1	YCL025C	AGP1	-0.374797	-0.836827	0.751177	0.954233	no	no	no	no
YCL026C-A::chr00_16a	YCL026C-A	FRM2	1.05816	-0.272623	0.0118069	0.716417	no	no	no	no
YCL026C::chr3_1	deleted	YCL026C	0.030256	-0.0275101	0.439086	0.534971	no	no	no	no
YCL028W::chr3_1	YCL028W	RNQ1	0.920658	-0.120619	0.0237906	0.607113	no	no	no	no
YCL029C::chr3_1	YCL029C	BIK1	-0.304408	0.308935	0.703227	0.281901	no	yes	no	yes
YCL035C::chr00_11	YCL035C	GRX1	-0.986232	-0.220155	0.973403	0.680297	no	no	no	no
YCL038C::chr00_12	YCL038C	ATG22	0.665845	0.557452	0.0724186	0.142672	no	no	no	no
YCL040W::chr3_1	YCL040W	GLK1	0.321196	-0.0502302	0.226469	0.552776	no	no	no	no
YCL041C::chr00_11	YCL041C	YCL041C	-0.00596835	0.601847	0.468546	0.123813	no	no	no	no
YCL041C::chr3_1	YCL041C	YCL041C	0.335696	0.184235	0.21761	0.370422	no	no	no	no
YCL044C::chr3_1	YCL044C	MGR1	0.261695	-0.245246	0.264877	0.697814	no	no	no	no
YCL045C::chr3_1	YCL045C	EMC1	0.204013	0.126648	0.305035	0.414137	no	no	no	no
YCL046W::chr3_1	YCL046W	YCL046W	1.05816	0.94977	0.0118069	0.0326065	no	no	no	no
YCL048W::chr3_1	YCL048W	SPS22	0.385737	-0.542083	0.188615	0.86538	no	no	no	no
YCL050C::chr3_1	YCL050C	APA1	-0.559715	-0.0722565	0.854926	0.569937	no	no	no	no
YCL052C::chr3_1	YCL052C	PBN1	-0.111763	-0.0946243	0.554977	0.587229	no	no	no	no
YCL053C::chr3_1	deleted	YCL053C	1.40847	0.686735	0.0014297	0.0927658	yes	no	yes	no
YCL055W::chr3_1	YCL055W	KAR4	0.473199	-0.385214	0.143992	0.786625	no	no	no	no
YCL056C::chr3_1	YCL056C	PEX34	1.01086	0.769198	0.0151462	0.0685208	no	no	no	no
YCL074W::chr00_12	YCL074W	YCL074W	-0.497654	-0.450768	0.823917	0.822343	no	no	no	no
YCL075W::chr00_12	YCL075W	YCL075W	0.223221	-0.28372	0.291365	0.723799	no	no	no	no
YCR001W::chr3_1	YCR001W	YCR001W	-0.0554948	0.388654	0.509071	0.231242	no	no	no	no
YCR002C::chr3_1	YCR002C	CDC10	-0.687265	-0.24817	0.90652	0.699826	no	no	no	no
YCR003W::chr3_1	YCR003W	MRPL32	0.27526	0.0599528	0.255839	0.466093	no	no	no	no
YCR004C::chr3_1	YCR004C	YCP4	0.473199	-0.465268	0.143992	0.829702	no	no	no	no
YCR006C::chr3_1	YCR006C	YCR006C	1.14062	-0.128233	0.00749477	0.612886	no	no	no	no
YCR008W::chr3_1	YCR008W	SAT4	0.366284	-0.635193	0.199592	0.901273	no	no	no	no
YCR011C::chr3_1	YCR011C	ADP1	-0.0742883	0.0652471	0.524448	0.461935	no	no	no	no
YCR012W::chr00_11	YCR012W	PGK1	-0.696726	-0.442548	0.909722	0.818083	no	no	no	no
YCR013C::chr00_11	YCR013C	YCR013C	-0.0177869	-0.425739	0.478202	0.809176	no	no	no	no
YCR013C::chr3_1	YCR013C	YCR013C	-0.178877	0.297693	0.608733	0.289453	no	no	no	no
YCR014C::chr3_1	YCR014C	POL4	0.549148	0.0652471	0.111525	0.461935	no	no	no	no
YCR016W::chr3_1	YCR016W	YCR016W	0.422573	0.265272	0.168873	0.311748	no	no	no	no
YCR019W::chr3_1	YCR019W	MAK32	0.163871	-0.433559	0.334482	0.813352	no	no	no	no
YCR023C::chr3_1	YCR023C	YCR023C	-0.574106	-0.635193	0.861556	0.901273	no	no	no	no
YCR024C-A::chr00_1	YCR024C-A	PMP1	-0.774728	-1.09462	0.933085	0.985986	no	no	no	no
YCR027C::chr00_1	YCR027C	RHB1	-0.111763	1.53473	0.554977	0.00135009	no	no	no	no
YCR030C::chr00_16a	YCR030C	SYP1	0.829343	1.55745	0.0364354	0.00116393	no	no	no	no
YCR031C::chr00_1	YCR031C	RPS14A	-0.433691	-0.442548	0.787882	0.818083	no	no	no	no
YCR033W::chr00_16a	YCR033W	SNT1	0.280554	0.435197	0.252356	0.204188	no	no	no	no
YCR036W::chr00_1	YCR036W	RBK1	-0.0456738	-1.21296	0.501029	0.992467	no	no	no	no
YCR043C::chr00_1	YCR043C	YCR043C	0.189407	0.303407	0.315618	0.285603	no	no	no	no
YCR044C::chr00_1	YCR044C	PER1	0.5346	0.142415	0.117299	0.402037	no	no	no	no
YCR045C::chr00_1	YCR045C	RRT12	0.529783	0.158356	0.119257	0.389897	no	no	no	no
YCR053W::chr00_16a	YCR053W	THR4	0.250807	0.0753007	0.272247	0.454052	no	no	no	no
YCR054C::chr00_16a	YCR054C	CTR86	-0.526801	-0.45462	0.838969	0.824318	no	no	no	no
YCR057C::chr00_16a	YCR057C	PWP2	0.141994	0.859572	0.350986	0.0479044	no	no	no	no
YCR063W::chr00_1	YCR063W	BUD31	-0.0573152	0.534732	0.510562	0.15304	no	no	no	no
YCR064C::chr00_16a	YCR064C	YCR064C	-0.427265	-0.251864	0.784038	0.702361	no	no	no	no
YCR065W::chr00_1	YCR065W	HCM1	-0.526801	-0.519715	0.838969	0.855565	no	no	no	no
YCR066W::chr00_1	YCR066W	RAD18	-0.327492	0.412113	0.719411	0.217363	no	no	no	no
YCR067C::chr00_16a	YCR067C	SED4	-0.389297	-0.263224	0.760516	0.710092	no	no	no	no
YCR068W::chr00_1	YCR068W	ATG15	-1.11176	-1.72266	0.985775	0.999707	no	no	no	no
YCR069W::chr00_16a	YCR069W	CPR4	-0.281688	-0.335632	0.686894	0.757026	no	no	no	no
YCR071C::chr00_1	YCR071C	IMG2	-0.16423	-0.272623	0.59714	0.716417	no	no	no	no
YCR075C::chr00_16a	YCR075C	ERS1	0.659613	0.239276	0.0741981	0.330141	no	no	no	no
YCR076C::chr00_1	YCR076C	FUB1	0.830751	-0.0325281	0.0362051	0.538911	no	no	no	no
YCR081W::chr00_1	YCR081W	SRB8	0.193092	-0.4128	0.312933	0.80214	no	no	no	no
YCR085W::chr00_1	YCR085W	YCR085W	-0.154832	0.239276	0.589655	0.330141	no	no	no	no
YCR087W::chr00_1	YCR087W	YCR087W	-1.04137	-0.635193	0.979648	0.901273	no	no	no	no
YCR089W::chr00_16a	YCR089W	FIG2	0.0946879	1.36481	0.387611	0.00385967	no	no	no	no
YCR090C::chr00_2	YCR090C	YCR090C	0.888237	0.627842	0.0277759	0.113617	no	no	no	no
YCR091W::chr00_2	YCR091W	KIN82	-0.59719	-0.120619	0.871754	0.607113	no	no	no	no
YCR093W::chr00_2	YCR093W	CDC39	-0.526801	-0.635193	0.838969	0.901273	no	no	no	no
YCR095C::chr00_14	YCR095C	OCA4	-0.360791	-0.0185213	0.741975	0.527906	no	no	no	no
YCR098C::chr00_2	YCR098C	GIT1	-0.414326	-0.313265	0.776176	0.74298	no	no	no	no
YCR099C::chr00_2	YCR099C	YCR099C	0.418752	0.364807	0.170857	0.245842	no	no	no	no
YCR101C::chr00_2	YCR101C	YCR101C	-0.346228	-0.132692	0.732224	0.616256	no	no	no	no
YCR102C::chr00_2	YCR102C	YCR102C	0.714208	-0.0222158	0.0597007	0.530811	no	no	no	no
YCR105W::chr00_2	YCR105W	ADH7	0.299868	0.597468	0.239864	0.125592	no	no	no	no
YCR106W::chr00_2	YCR106W	RDS1	0.610703	0.502311	0.0893419	0.168678	no	no	no	no
YCR107W::chr00_17a	YCR107W	AAD3	-0.4654	-0.509662	0.806257	0.851	no	no	no	no
YDL001W::chr4_1	YDL001W	RMD1	0.288775	0.300677	0.246997	0.28744	no	no	no	no
YDL004W::chr4_1	YDL004W	ATP16	1.34314	0.569166	0.00219733	0.137517	no	no	no	no
YDL010W::chr4_1	YDL010W	GRX6	0.915204	0.890876	0.0244253	0.0420486	no	no	no	no
YDL011C::chr4_1	YDL011C	YDL011C	-0.0979572	0.324165	0.543758	0.271825	no	no	no	no
YDL012C::chr4_1	YDL012C	YDL012C	0.289753	0.24745	0.246363	0.32431	no	no	no	no
YDL013W::chr4_1	YDL013W	SLX5	0.511674	0.153303	0.126824	0.393734	no	no	no	no
YDL016C::chr4_1	YDL016C	YDL016C	-0.0122273	0.49409	0.473658	0.1728	no	no	no	no
YDL019C::chr4_1	YDL019C	OSH2	0.183693	-0.403867	0.319799	0.797192	no	no	no	no
YDL024C::chr4_1	YDL024C	DIA3	0.235508	0.572916	0.282773	0.135894	no	no	no	no
YDL025C::chr4_1	YDL025C	RTK1	0.51502	0.101773	0.125401	0.433389	no	no	no	no
YDL029W::chr4_1	YDL029W	ARP2	0.636698	-0.149766	0.0810293	0.629076	no	no	no	no
YDL031W::chr00_17a	YDL031W	DBP10	-0.0215652	0.765345	0.481293	0.0695322	no	no	no	no
YDL032W::chr4_1	YDL032W	YDL032W	1.64312	1.67151	0.000265949	0.000537195	no	yes	yes	yes
YDL036C::chr4_1	YDL036C	PUS9	0.473199	0.0753007	0.143992	0.454052	no	no	no	no
YDL037C::chr4_1	YDL037C	BSC1	-0.16423	0.627842	0.59714	0.113617	no	no	no	no
YDL039C::chr4_1	YDL039C	PRM7	-0.4528	-0.120619	0.799075	0.607113	no	no	no	no
YDL040C::chr4_1	YDL040C	NAT1	0.625203	0.812266	0.0846304	0.0579727	no	no	no	no
YDL041W::chr4_1	YDL041W	YDL041W	0.200181	-0.509662	0.307796	0.851	no	no	no	no
YDL042C::chr4_1	YDL042C	SIR2	-0.0198405	-0.202233	0.479882	0.667532	no	no	no	no
YDL044C::chr4_1	YDL044C	MTF2	-0.526801	-1.19159	0.838969	0.991542	no	no	no	no
YDL045C::chr4_1	YDL045C	FAD1	0.271566	0.163173	0.258284	0.386249	no	no	no	no
YDL048C::chr4_1	YDL048C	STP4	-0.119891	-0.178814	0.561562	0.650556	no	no	no	no
YDL049C::chr4_1	YDL049C	KNH1	0.0037142	-0.256681	0.460648	0.705651	no	no	no	no
YDL051W::chr4_1	YDL051W	LHP1	-0.673642	-0.4128	0.901763	0.80214	no	no	no	no
YDL052C::chr4_1	YDL052C	SLC1	-0.439338	-0.00716143	0.791227	0.518964	no	no	no	no
YDL054C::chr4_1	YDL054C	MCH1	0.980159	0.419255	0.0177227	0.213235	no	no	no	no
YDL057W::chr4_1	YDL057W	YDL057W	0.125276	-0.497689	0.363791	0.84544	no	no	no	no
YDL058W::chr00_17a	YDL058W	USO1	-0.12048	0.0587042	0.562039	0.467074	no	no	no	no
YDL060W::chr4_1	YDL060W	TSR1	0.440778	-0.033742	0.159625	0.539864	no	no	no	no
YDL061C::chr4_1	YDL061C	RPS29B	-0.696726	-0.635193	0.909722	0.901273	no	no	no	no
YDL062W::chr4_1	YDL062W	YDL062W	1.00371	-0.32707	0.015715	0.751699	no	no	no	no
YDL070W::chr4_1	YDL070W	BDF2	0.395197	0.727377	0.183414	0.0801234	no	no	no	no
YDL075W::chr4_1	YDL075W	RPL31A	-0.480997	0.0428793	0.814928	0.479523	no	no	no	no
YDL077C::chr4_1	YDL077C	VAM6	-0.593915	0.757125	0.87034	0.0717287	no	no	no	no
YDL078C::chr4_1	YDL078C	MDH3	-0.363302	-0.0757652	0.743638	0.572659	no	no	no	no
YDL079C::chr4_1	YDL079C	MRK1	-0.182152	0.101773	0.611312	0.433389	no	no	no	no
YDL080C::chr4_1	YDL080C	THI3	-0.263766	0.142415	0.673744	0.402037	no	no	no	no
YDL083C::chr4_1	YDL083C	RPS16B	0.473199	0.634897	0.143992	0.110957	no	no	no	no
YDL084W::chr4_1	YDL084W	SUB2	0.0425651	0.0810144	0.429144	0.44958	no	no	no	no
YDL086W::chr4_1	YDL086W	YDL086W	-0.111763	-0.298158	0.554977	0.733259	no	no	no	no
YDL088C::chr4_1	YDL088C	ASM4	0.332337	0.126648	0.219645	0.414137	no	no	no	no
YDL092W::chr4_1	YDL092W	SRP14	0.643124	-0.580745	0.0790673	0.881244	no	no	no	no
YDL094C::chr4_1	YDL094C	YDL094C	0.427396	-0.0733138	0.16639	0.570757	no	no	no	no
YDL098C::chr4_2	YDL098C	SNU23	-0.933976	-0.359558	0.96608	0.771579	no	no	no	no
YDL100C::chr4_2	YDL100C	GET3	-0.0938411	0.032232	0.540406	0.487912	no	no	no	no
YDL101C::chr4_2	YDL101C	DUN1	0.5346	0.364807	0.117299	0.245842	no	no	no	no
YDL104C::chr4_2	YDL104C	QRI7	0.125276	0.123799	0.363791	0.416332	no	no	no	no
YDL105W::chr4_2	YDL105W	NSE4	0.522109	0.94977	0.122424	0.0326065	no	no	no	no
YDL106C::chr4_2	YDL106C	PHO2	0.294862	0.44281	0.243068	0.199949	no	no	no	no
YDL109C::chr4_2	YDL109C	YDL109C	-0.327492	0.319004	0.719411	0.27522	no	no	no	no
YDL115C::chr4_2	YDL115C	IWR1	-1.6643	-0.635193	0.999558	0.901273	no	no	no	no
YDL116W::chr4_2	YDL116W	NUP84	0.315658	-0.0222158	0.229906	0.530811	no	no	no	no
YDL118W::chr4_2	YDL118W	YDL118W	0.262982	-0.422199	0.264013	0.807266	no	no	no	no
YDL119C::chr4_2	YDL119C	YDL119C	-0.360791	-0.240914	0.741975	0.69482	no	no	no	no
YDL125C::chr4_2	YDL125C	HNT1	0.058162	0.0753007	0.416611	0.454052	no	no	no	no
YDL130W-A::chr00_2	YDL130W-A	STF1	0.0665742	0.398755	0.409885	0.225206	no	no	no	no
YDL131W::chr4_2	YDL131W	LYS21	-0.433691	0.163173	0.787882	0.386249	no	no	no	no
YDL133C-A::chr00_14	YDL133C-A	RPL41B	0.01752	-0.0908721	0.449414	0.584339	no	no	no	no
YDL141W::chr4_2	YDL141W	BPL1	0.538788	0.94977	0.115616	0.0326065	no	no	no	no
YDL143W::chr4_2	YDL143W	CCT4	-0.526801	0.823509	0.838969	0.0554409	no	yes	no	yes
YDL153C::chr4_2	YDL153C	SAS10	0.0326269	-0.4128	0.437168	0.80214	no	no	no	no
YDL158C::chr4_2	YDL158C	YDL158C	-0.705138	0.290807	0.912501	0.294126	no	no	no	no
YDL160C::chr4_2	YDL160C	DHH1	-0.129465	0.212804	0.569297	0.349303	no	no	no	no
YDL162C::chr4_2	YDL162C	YDL162C	0.523826	-0.0991398	0.121711	0.5907	no	no	no	no
YDL167C::chr4_2	YDL167C	NRP1	0.530915	0.45227	0.118795	0.194757	no	no	no	no
YDL168W::chr4_2	YDL168W	SFA1	0.818335	1.33443	0.0382769	0.00460617	no	no	no	no
YDL171C::chr4_2	YDL171C	GLT1	-0.562424	-0.313265	0.85619	0.74298	no	no	no	no
YDL172C::chr4_2	YDL172C	YDL172C	0.383002	-0.00292444	0.190135	0.515627	no	no	no	no
YDL174C::chr4_2	YDL174C	DLD1	0.568357	0.395834	0.104216	0.226942	no	no	no	no
YDL175C::chr4_2	YDL175C	AIR2	0.406085	0.297693	0.177539	0.289453	no	no	no	no
YDL176W::chr4_2	YDL176W	YDL176W	-0.283529	0.315898	0.688232	0.277272	no	no	no	no
YDL182W::chr4_2	YDL182W	LYS20	-0.0823192	0.765345	0.531009	0.0695322	no	no	no	no
YDL183C::chr4_2	YDL183C	YDL183C	-0.0215652	0.502311	0.481293	0.168678	no	no	no	no
YDL185W::chr4_2	YDL185W	VMA1	0.932631	0.431922	0.0224459	0.206028	no	no	no	no
YDL190C::chr4_2	YDL190C	UFD2	0.196935	-1.06466	0.310144	0.983728	no	no	no	no
YDL195W::chr4_3	YDL195W	SEC31	0.271566	-0.400727	0.258284	0.795435	no	no	no	no
YDL197C::chr4_3	YDL197C	ASF2	-0.150237	0.252333	0.585984	0.320848	no	no	no	no
YDL199C::chr4_3	YDL199C	YDL199C	0.59873	0.142415	0.0933772	0.402037	no	no	no	no
YDL200C::chr4_3	YDL200C	MGT1	0.101231	0.0599528	0.382477	0.466093	no	no	no	no
YDL201W::chr4_3	YDL201W	TRM8	-0.0122273	0.94977	0.473658	0.0326065	no	no	no	no
YDL205C::chr4_3	YDL205C	HEM3	0.650077	0.257892	0.0769854	0.316924	no	no	no	no
YDL212W::chr4_3	YDL212W	SHR3	0.473199	-0.234655	0.143992	0.690472	no	no	no	no
YDL216C::chr4_3	YDL216C	RRI1	-0.474333	-0.528277	0.811253	0.859377	no	no	no	no
YDL217C::chr4_3	YDL217C	TIM22	0.9757	-0.717655	0.0181265	0.926725	no	no	no	no
YDL224C::chr4_3	YDL224C	WHI4	0.32881	0.153303	0.221793	0.393734	no	no	no	no
YDL230W::chr4_3	YDL230W	PTP1	0.569415	0.412113	0.103823	0.217363	no	no	no	no
YDL231C::chr4_3	YDL231C	BRE4	-0.767809	-1.08265	0.931224	0.985119	no	no	no	no
YDL235C::chr4_3	YDL235C	YPD1	0.721127	-0.0877049	0.0580338	0.581896	no	no	no	no
YDL237W::chr4_3	YDL237W	AIM6	0.366284	-0.32707	0.199592	0.751699	no	no	no	no
YDL241W::chr4_3	YDL241W	YDL241W	-0.334155	-1.88312	0.724002	0.999913	no	no	no	no
YDL243C::chr4_3	YDL243C	AAD4	-0.470217	-0.256681	0.808961	0.705651	no	no	no	no
YDR001C::chr4_3	YDR001C	NTH1	1.02069	0.44281	0.0143922	0.199949	no	no	no	no
YDR002W::chr4_3	YDR002W	YRB1	0.753307	2.58904	0.0507573	1.85004e-07	no	yes	no	yes
YDR005C::chr4_3	YDR005C	MAF1	-0.154832	-1.17576	0.589655	0.990795	no	no	no	no
YDR007W::chr00_16b	YDR007W	TRP1	0.250807	-0.635193	0.272247	0.901273	no	no	no	no
YDR010C::chr4_3	YDR010C	YDR010C	-0.689072	-0.149766	0.907138	0.629076	no	no	no	no
YDR011W::chr4_3	YDR011W	SNQ2	0.762706	0.502311	0.0487751	0.168678	no	no	no	no
YDR013W::chr4_3	YDR013W	PSF1	0.684704	0.239276	0.0672323	0.330141	no	no	no	no
YDR018C::chr4_3	YDR018C	YDR018C	0.151271	-0.220155	0.34395	0.680297	no	no	no	no
YDR021W::chr4_3	YDR021W	FAL1	-0.133458	-0.263224	0.572516	0.710092	no	no	no	no
YDR022C::chr4_3	YDR022C	CIS1	0.860223	-0.132692	0.0316536	0.616256	no	no	no	no
YDR023W::chr4_3	YDR023W	SES1	-0.416618	0.0599528	0.77758	0.466093	no	no	no	no
YDR024W::chr4_3	YDR024W	FYV1	0.343916	-0.279049	0.212678	0.720703	no	no	no	no
YDR027C::chr4_3	YDR027C	VPS54	0.335696	-1.48319	0.21761	0.998486	no	no	no	no
YDR029W::chr4_3	YDR029W	YDR029W	-0.00484781	0.417275	0.467631	0.214375	no	no	no	no
YDR031W::chr4_3	YDR031W	MIC14	0.473199	0.438808	0.143992	0.202171	no	no	no	no
YDR034C::chr4_3	YDR034C	LYS14	-0.121959	0.459965	0.563235	0.190595	no	no	no	no
YDR036C::chr4_3	YDR036C	EHD3	0.508823	0.552434	0.128045	0.14492	no	no	no	no
YDR041W::chr00_16b	YDR041W	RSM10	-0.913824	-0.394185	0.962845	0.791746	no	no	no	no
YDR042C::chr4_3	YDR042C	YDR042C	0.368863	0.227304	0.198115	0.338756	no	no	no	no
YDR043C::chr4_3	YDR043C	NRG1	0.40105	-0.519715	0.180241	0.855565	no	no	no	no
YDR044W::chr4_3	YDR044W	HEM13	0.333475	0.159988	0.218954	0.388661	no	no	no	no
YDR045C::chr4_3	YDR045C	RPC11	0.366284	-0.519715	0.199592	0.855565	no	no	no	no
YDR046C::chr4_3	YDR046C	BAP3	0.795128	-0.372158	0.0424079	0.779042	no	no	no	no
YDR051C::chr4_4	YDR051C	DET1	-0.341245	0.90086	0.728845	0.0403077	no	no	no	no
YDR053W::chr4_4	YDR053W	YDR053W	-0.678804	-0.55273	0.903586	0.869887	no	no	no	no
YDR055W::chr4_4	YDR055W	PST1	0.814236	0.290807	0.0389816	0.294126	no	no	no	no
YDR059C::chr4_4	YDR059C	UBC5	-0.656084	-0.0946243	0.895373	0.587229	no	no	no	no
YDR060W::chr4_4	YDR060W	MAK21	0.756992	1.00224	0.0499726	0.0257377	no	no	no	no
YDR063W::chr4_4	YDR063W	AIM7	-0.00323856	-0.0185213	0.466318	0.527906	no	no	no	no
YDR064W::chr4_4	YDR064W	RPS13	0.620041	-0.140428	0.0862858	0.622081	no	no	no	no
YDR065W::chr4_4	YDR065W	RRG1	0.058162	-0.509662	0.416611	0.851	no	no	no	no
YDR066C::chr4_4	YDR066C	RTR2	-0.417571	3.08654	0.778163	6.51327e-10	no	yes	no	yes
YDR067C::chr4_4	YDR067C	OCA6	-0.150237	0.404336	0.585984	0.22191	no	no	no	no
YDR069C::chr4_4	YDR069C	DOA4	-0.159069	0.51681	0.593034	0.161561	no	no	no	no
YDR071C::chr00_11	YDR071C	PAA1	0.5346	-0.0502302	0.117299	0.552776	no	no	no	no
YDR072C::chr4_4	YDR072C	IPT1	-0.393534	-0.635193	0.763209	0.901273	no	no	no	no
YDR073W::chr4_4	YDR073W	SNF11	0.232191	-0.0502302	0.28508	0.552776	no	no	no	no
YDR074W::chr00_11	YDR074W	TPS2	-0.38095	1.48028	0.755163	0.0019119	no	no	no	no
YDR077W::chr4_4	YDR077W	SED1	0.0137679	0.364807	0.452463	0.245842	no	no	no	no
YDR085C::chr4_4	YDR085C	AFR1	0.225272	-0.542083	0.289922	0.86538	no	no	no	no
YDR086C::chr4_4	YDR086C	SSS1	0.151271	0.483452	0.34395	0.17823	no	no	no	no
YDR088C::chr4_4	YDR088C	SLU7	-0.189766	0.94977	0.617289	0.0326065	no	no	no	no
YDR089W::chr4_4	YDR089W	YDR089W	-0.0293009	0.727377	0.487623	0.0801234	no	no	no	no
YDR090C::chr4_4	YDR090C	YDR090C	0.0326269	0.471723	0.437168	0.18434	no	no	no	no
YDR097C::chr4_4	YDR097C	MSH6	0.59873	0.534732	0.0933772	0.15304	no	no	no	no
YDR099W::chr4_4	YDR099W	BMH2	0.473199	-0.45462	0.143992	0.824318	no	no	no	no
YDR101C::chr4_4	YDR101C	ARX1	0.183693	-0.372158	0.319799	0.779042	no	no	no	no
YDR102C::chr4_4	YDR102C	YDR102C	-0.281688	0.0428793	0.686894	0.479523	no	no	no	no
YDR104C::chr4_4	YDR104C	SPO71	0.058162	0.419255	0.416611	0.213235	no	no	no	no
YDR107C::chr4_4	YDR107C	TMN2	-0.14571	0.172162	0.58236	0.37947	no	no	no	no
YDR111C::chr4_4	YDR111C	ALT2	-0.650183	0.172162	0.893159	0.37947	no	no	no	no
YDR116C::chr4_4	YDR116C	MRPL1	-1.0293	-0.635193	0.978399	0.901273	no	no	no	no
YDR118W::chr4_4	YDR118W	APC4	-0.971585	-0.55273	0.971498	0.869887	no	no	no	no
YDR119W::chr4_4	YDR119W	VBA4	0.352905	0.888369	0.20736	0.0424951	no	no	no	no
YDR122W::chr4_4	YDR122W	KIN1	0.269666	0.161274	0.259547	0.387687	no	no	no	no
YDR126W::chr4_4	YDR126W	SWF1	0.397251	0.66737	0.182297	0.0992845	no	no	no	no
YDR127W::chr4_4	YDR127W	ARO1	-0.38095	-0.32707	0.755163	0.751699	no	no	no	no
YDR129C::chr4_4	YDR129C	SAC6	1.15127	1.50158	0.00705427	0.00167079	no	yes	no	yes
YDR130C::chr4_4	YDR130C	FIN1	1.10707	0.271698	0.00904537	0.30727	no	no	no	no
YDR131C::chr4_4	YDR131C	YDR131C	0.219443	1.48028	0.294031	0.0019119	no	no	no	no
YDR132C::chr4_4	YDR132C	YDR132C	-0.574106	-0.815765	0.861556	0.950091	no	no	no	no
YDR133C::chr4_4	YDR133C	YDR133C	0.0137679	0.364807	0.452463	0.245842	no	no	no	no
YDR140W::chr4_4	YDR140W	MTQ2	0.473199	0.27461	0.143992	0.305251	no	no	no	no
YDR143C::chr4_4	YDR143C	SAN1	0.390737	0.336793	0.185854	0.263608	no	no	no	no
YDR144C::chr4_4	YDR144C	MKC7	0.516268	0.867308	0.124873	0.0463999	no	no	no	no
YDR145W::chr4_4	YDR145W	TAF12	0.0257405	0.824239	0.442743	0.0552794	no	no	no	no
YDR146C::chr4_4	YDR146C	SWI5	-0.568621	-0.302617	0.859054	0.736148	no	no	no	no
YDR147W::chr4_5	YDR147W	EKI1	0.532906	-0.0981646	0.117985	0.589951	no	no	no	no
YDR148C::chr4_5	YDR148C	KGD2	-0.111763	-0.0826516	0.554977	0.577992	no	no	no	no
YDR149C::chr4_5	YDR149C	YDR149C	0.383002	0.231541	0.190135	0.335698	no	no	no	no
YDR150W::chr4_5	YDR150W	NUM1	0.235508	0.430897	0.282773	0.206606	no	no	no	no
YDR151C::chr4_5	YDR151C	CTH1	0.156726	0.33784	0.339839	0.262932	no	no	no	no
YDR152W::chr4_5	YDR152W	GIR2	-0.030843	-0.211385	0.488885	0.674076	no	no	no	no
YDR153C::chr4_5	YDR153C	ENT5	-0.569869	-0.234655	0.859626	0.690472	no	no	no	no
YDR154C::chr4_5	YDR154C	YDR154C	-0.101495	0.597468	0.546637	0.125592	no	no	no	no
YDR155C::chr4_5	YDR155C	CPR1	0.0112954	1.00526	0.454474	0.0253814	no	no	no	no
YDR156W::chr4_5	YDR156W	RPA14	-0.72943	-0.358352	0.920165	0.770858	no	no	no	no
YDR157W::chr4_5	YDR157W	YDR157W	-0.556548	-0.137693	0.853438	0.620025	no	no	no	no
YDR159W::chr4_5	YDR159W	SAC3	0.110629	-0.342411	0.375138	0.761199	no	no	no	no
YDR160W::chr4_5	YDR160W	SSY1	1.4732	0.471723	0.000918676	0.18434	no	no	yes	no
YDR161W::chr4_5	YDR161W	YDR161W	-0.836129	-0.81207	0.947941	0.949335	no	no	no	no
YDR162C::chr4_5	YDR162C	NBP2	-0.459686	0.016884	0.80302	0.500012	no	no	no	no
YDR163W::chr4_5	YDR163W	CWC15	-0.552336	-0.782034	0.851444	0.94284	no	no	no	no
YDR164C::chr4_5	YDR164C	SEC1	0.210165	0.0237704	0.300626	0.494582	no	no	no	no
YDR166C::chr4_5	YDR166C	SEC5	0.00925238	0.222788	0.456137	0.342028	no	no	no	no
YDR169C::chr4_5	YDR169C	STB3	-0.935606	-0.421068	0.966331	0.806653	no	no	no	no
YDR171W::chr4_5	YDR171W	HSP42	0.143892	0.402282	0.349542	0.22312	no	no	no	no
YDR172W::chr4_5	YDR172W	SUP35	-0.430585	-0.00292444	0.786029	0.515627	no	no	no	no
YDR174W::chr00_14	YDR174W	HMO1	0.681786	0.67293	0.0680153	0.0973797	no	no	no	no
YDR176W::chr4_5	YDR176W	NGG1	-0.719446	-0.635193	0.917079	0.901273	no	no	no	no
YDR177W::chr4_5	YDR177W	UBC1	-0.22724	-0.442548	0.64628	0.818083	no	no	no	no
YDR178W::chr4_5	YDR178W	SDH4	0.41976	2.09273	0.170332	2.04072e-05	no	no	no	yes
YDR180W::chr4_5	YDR180W	SCC2	0.399199	-0.55719	0.181241	0.871743	no	no	no	no
YDR181C::chr4_5	YDR181C	SAS4	-0.194225	-0.0502302	0.620778	0.552776	no	no	no	no
YDR184C::chr4_5	YDR184C	ATC1	0.473199	1.55745	0.143992	0.00116393	no	no	no	no
YDR185C::chr4_5	YDR185C	UPS3	-0.574106	-0.187734	0.861556	0.657059	no	no	no	no
YDR186C::chr4_5	YDR186C	YDR186C	0.143051	0.246163	0.350182	0.325226	no	no	no	no
YDR187C::chr4_5	YDR187C	YDR187C	0.0772708	0.290807	0.401372	0.294126	no	no	no	no
YDR189W::chr4_5	YDR189W	SLY1	0.351893	1.02777	0.207955	0.0228603	no	no	no	no
YDR190C::chr4_5	YDR190C	RVB1	-0.419885	0.172162	0.779574	0.37947	no	no	no	no
YDR191W::chr4_5	YDR191W	HST4	-0.493634	0.123799	0.821773	0.416332	no	no	no	no
YDR192C::chr4_5	YDR192C	NUP42	0.695592	-0.330338	0.0643715	0.753739	no	no	no	no
YDR194C::chr4_5	YDR194C	MSS116	-0.204872	-0.460106	0.629066	0.827105	no	no	no	no
YDR195W::chr4_5	YDR195W	REF2	-0.125438	-0.0908721	0.566047	0.584339	no	no	no	no
YDR196C::chr4_5	YDR196C	CAB5	0.543589	0.712731	0.113707	0.0845203	no	no	no	no
YDR197W::chr4_5	YDR197W	CBS2	0.115647	-0.0946243	0.371238	0.587229	no	no	no	no
YDR198C::chr4_5	YDR198C	RKM2	0.119563	0.364807	0.368204	0.245842	no	no	no	no
YDR201W::chr4_5	YDR201W	SPC19	0.200181	-0.635193	0.307796	0.901273	no	no	no	no
YDR202C::chr00_14	YDR202C	RAV2	0.427396	-0.650623	0.16639	0.906472	no	no	no	no
YDR203W::chr4_5	YDR203W	YDR203W	0.312735	0.0599528	0.231732	0.466093	no	no	no	no
YDR204W::chr4_5	YDR204W	COQ4	0.332718	-0.325508	0.219413	0.75072	no	no	no	no
YDR205W::chr00_14	YDR205W	MSC2	-0.818567	0.763357	0.943988	0.0700587	no	no	no	no
YDR207C::chr4_5	YDR207C	UME6	1.31273	1.28235	0.00266866	0.00619005	no	no	no	no
YDR208W::chr4_5	YDR208W	MSS4	0.629319	1.65021	0.0833274	0.00062287	no	no	no	yes
YDR209C::chr4_5	YDR209C	YDR209C	-0.281688	0.490338	0.686894	0.174703	no	no	no	no
YDR210W::chr4_5	YDR210W	YDR210W	-0.157567	0.149079	0.591837	0.39695	no	no	no	no
YDR211W::chr4_5	YDR211W	GCD6	0.543589	1.75712	0.113707	0.000291384	no	no	no	yes
YDR213W::chr4_5	YDR213W	UPC2	0.829343	1.04288	0.0364354	0.0212892	no	no	no	no
YDR216W::chr4_5	YDR216W	ADR1	0.0414832	-0.338211	0.430016	0.758618	no	no	no	no
YDR218C::chr4_5	YDR218C	SPR28	0.661645	0.394555	0.0736143	0.227705	no	no	no	no
YDR219C::chr4_5	YDR219C	MFB1	-0.0293009	-0.0502302	0.487623	0.552776	no	no	no	no
YDR220C::chr4_5	YDR220C	YDR220C	-0.16423	-0.880305	0.59714	0.96191	no	no	no	no
YDR221W::chr4_5	YDR221W	GTB1	-0.122904	0.0906324	0.563999	0.442066	no	no	no	no
YDR222W::chr4_5	YDR222W	YDR222W	-0.353964	-0.00292444	0.737427	0.515627	no	no	no	no
YDR223W::chr4_5	YDR223W	CRF1	-0.719446	-0.827838	0.917079	0.952501	no	no	no	no
YDR227W::chr4_5	YDR227W	SIR4	-0.487813	-0.136773	0.81864	0.619333	no	no	no	no
YDR229W::chr4_5	YDR229W	IVY1	0.540314	-0.175761	0.115007	0.648319	no	no	no	no
YDR230W::chr4_5	YDR230W	YDR230W	-0.178877	-0.4128	0.608733	0.80214	no	no	no	no
YDR232W::chr4_5	YDR232W	HEM1	-0.204872	-1.31326	0.629066	0.995719	no	no	no	no
YDR234W::chr4_5	YDR234W	LYS4	-0.816307	-0.787196	0.943463	0.944	no	no	no	no
YDR235W::chr4_5	YDR235W	PRP42	-0.278873	0.0277724	0.684844	0.491427	no	no	no	no
YDR237W::chr4_5	YDR237W	MRPL7	1.08654	-0.220155	0.0101268	0.680297	yes	no	yes	no
YDR238C::chr4_5	YDR238C	SEC26	-0.935272	-0.136773	0.96628	0.619333	no	no	no	no
YDR239C::chr4_5	YDR239C	YDR239C	0.183693	-0.465268	0.319799	0.829702	no	no	no	no
YDR241W::chr4_5	YDR241W	BUD26	0.00925238	-0.300774	0.456137	0.734956	no	no	no	no
YDR244W::chr4_6	YDR244W	PEX5	0.409069	-0.0826516	0.175951	0.577992	no	no	no	no
YDR246W::chr4_6	YDR246W	TRS23	-1.06023	-1.29416	0.981477	0.995219	no	no	no	no
YDR247W::chr4_6	YDR247W	VHS1	-1.58569	0.086543	0.999222	0.445259	no	yes	no	yes
YDR248C::chr4_6	YDR248C	YDR248C	0.714208	0.257892	0.0597007	0.316924	no	no	no	no
YDR249C::chr4_6	YDR249C	YDR249C	-0.408156	-1.0877	0.772371	0.98549	no	no	no	no
YDR250C::chr4_6	YDR250C	YDR250C	-0.304408	0.308935	0.703227	0.281901	no	yes	no	yes
YDR251W::chr4_6	YDR251W	PAM1	0.125276	-0.345686	0.363791	0.763202	no	no	no	no
YDR253C::chr4_6	YDR253C	MET32	-1.27631	-0.721736	0.994277	0.92784	no	no	no	no
YDR254W::chr4_6	YDR254W	CHL4	0.588677	0.743319	0.0968685	0.0755368	no	no	no	no
YDR256C::chr4_6	YDR256C	CTA1	-1.26377	-0.857585	0.993844	0.958041	no	no	no	no
YDR259C::chr4_6	YDR259C	YAP6	0.0371004	-1.24817	0.433552	0.993797	no	no	no	no
YDR261C::chr4_6	YDR261C	EXG2	-1.00073	-1.05023	0.975183	0.982534	no	no	no	no
YDR263C::chr4_6	YDR263C	DIN7	-1.11584	-0.721736	0.986075	0.92784	no	no	no	no
YDR264C::chr4_6	YDR264C	AKR1	-0.0392505	-0.0395829	0.495769	0.544443	no	no	no	no
YDR268W::chr4_6	YDR268W	MSW1	-0.433691	-1.09462	0.787882	0.985986	no	no	no	no
YDR272W::chr4_6	YDR272W	GLO2	0.058162	0.534732	0.416611	0.15304	no	no	no	no
YDR273W::chr4_6	YDR273W	DON1	-0.0293009	0.142415	0.487623	0.402037	no	no	no	no
YDR275W::chr4_6	YDR275W	BSC2	-0.604803	0.671505	0.875	0.0978651	no	yes	no	yes
YDR278C::chr4_6	YDR278C	YDR278C	-0.40127	-0.372158	0.768081	0.779042	no	no	no	no
YDR281C::chr4_6	YDR281C	PHM6	0.762706	0.0872734	0.0487751	0.444688	no	no	no	no
YDR286C::chr4_6	YDR286C	YDR286C	-0.334155	-0.635193	0.724002	0.901273	no	no	no	no
YDR287W::chr4_6	YDR287W	INM2	0.32881	-0.19462	0.221793	0.662049	no	no	no	no
YDR288W::chr4_6	YDR288W	NSE3	-0.614263	0.0428793	0.878953	0.479523	no	no	no	no
YDR290W::chr4_6	YDR290W	YDR290W	0.232191	-0.345686	0.28508	0.763202	no	no	no	no
YDR291W::chr4_6	YDR291W	HRQ1	0.409069	0.364807	0.175951	0.245842	no	no	no	no
YDR293C::chr4_6	YDR293C	SSD1	-0.526801	-0.442548	0.838969	0.818083	no	no	no	no
YDR294C::chr4_6	YDR294C	DPL1	-0.986232	-0.957121	0.973403	0.972893	no	no	no	no
YDR295C::chr4_6	YDR295C	HDA2	-1.17888	-0.149766	0.990065	0.629076	no	no	no	no
YDR296W::chr4_6	YDR296W	MHR1	-1.05732	0.212804	0.981203	0.349303	no	no	no	no
YDR297W::chr4_6	YDR297W	SUR2	0.625203	0.51681	0.0846304	0.161561	no	no	no	no
YDR299W::chr4_6	YDR299W	BFR2	-0.111763	0.51681	0.554977	0.161561	no	no	no	no
YDR300C::chr4_6	YDR300C	PRO1	-1.02838	-1.3067	0.978301	0.995552	no	no	no	no
YDR302W::chr4_6	YDR302W	GPI11	-0.444338	-1.27262	0.794163	0.994594	no	no	no	no
YDR304C::chr4_6	YDR304C	CPR5	1.03508	0.412113	0.0133468	0.217363	no	no	no	no
YDR305C::chr4_6	YDR305C	HNT2	-0.719446	-1.4128	0.917079	0.997642	no	no	no	no
YDR306C::chr4_6	YDR306C	YDR306C	0.572735	-1.12062	0.102599	0.987721	no	no	no	no
YDR307W::chr4_6	YDR307W	YDR307W	-0.263766	-0.0502302	0.673744	0.552776	no	no	no	no
YDR310C::chr4_6	YDR310C	SUM1	0.193092	-0.149766	0.312933	0.629076	no	no	no	no
YDR313C::chr4_6	YDR313C	PIB1	-0.178877	-1.14977	0.608733	0.989441	no	no	no	no
YDR314C::chr4_6	YDR314C	RAD34	-0.356876	-0.635193	0.739372	0.901273	no	no	no	no
YDR317W::chr4_6	YDR317W	HIM1	-1.07429	-1.57861	0.982747	0.999193	no	no	no	no
YDR320C::chr4_6	YDR320C	SWA2	0.473199	0.00223727	0.143992	0.511559	no	no	no	no
YDR321W::chr4_6	YDR321W	ASP1	-0.4654	-0.0502302	0.806257	0.552776	no	no	no	no
YDR323C::chr4_6	YDR323C	PEP7	-0.613344	-0.136773	0.878573	0.619333	no	no	no	no
YDR324C::chr4_6	YDR324C	UTP4	-0.263766	-0.465268	0.673744	0.829702	no	no	no	no
YDR327W::chr4_6	YDR327W	YDR327W	0.101231	0.282345	0.382477	0.299914	no	no	no	no
YDR331W::chr4_6	YDR331W	GPI8	-0.111763	-0.0137043	0.554977	0.524116	no	no	no	no
YDR334W::chr4_6	YDR334W	SWR1	-0.487813	-0.721736	0.81864	0.92784	no	no	no	no
YDR338C::chr4_7	YDR338C	YDR338C	-0.526801	0.123799	0.838969	0.416332	no	no	no	no
YDR344C::chr4_7	YDR344C	YDR344C	-0.233069	-0.19462	0.650719	0.662049	no	no	no	no
YDR345C::chr4_7	YDR345C	HXT3	-0.986232	0.50158	0.973403	0.169041	no	yes	no	yes
YDR346C::chr4_7	YDR346C	SVF1	0.0861764	0.257892	0.394319	0.316924	no	no	no	no
YDR347W::chr4_7	YDR347W	MRP1	-0.526801	-0.869658	0.838969	0.960135	no	no	no	no
YDR349C::chr4_7	YDR349C	YPS7	-0.705138	-0.474728	0.912501	0.834397	no	no	no	no
YDR350C::chr4_7	YDR350C	ATP22	-1.4654	-0.372158	0.998233	0.779042	no	no	no	no
YDR351W::chr4_7	YDR351W	SBE2	0.058162	0.627842	0.416611	0.113617	no	no	no	no
YDR352W::chr4_7	YDR352W	YDR352W	-0.719446	0.308935	0.917079	0.281901	no	yes	no	yes
YDR354W::chr4_7	YDR354W	TRP4	-0.848729	0.0428793	0.950639	0.479523	no	no	no	no
YDR355C::chr4_7	YDR355C	YDR355C	0.795128	0.686735	0.0424079	0.0927658	no	no	no	no
YDR356W::chr4_7	YDR356W	SPC110	-0.941838	-1.05023	0.967278	0.982534	no	no	no	no
YDR359C::chr4_7	YDR359C	EAF1	-0.111763	-0.220155	0.554977	0.680297	no	no	no	no
YDR360W::chr4_7	YDR360W	OPI7	0.347669	-0.345686	0.210448	0.763202	no	no	no	no
YDR361C::chr4_7	YDR361C	BCP1	-0.526801	-0.149766	0.838969	0.629076	no	no	no	no
YDR362C::chr4_7	YDR362C	TFC6	-0.185764	0.80538	0.614151	0.0595678	no	no	no	no
YDR363W-A::chr00_2	YDR363W-A	SEM1	-0.614263	-0.805118	0.878953	0.947886	no	no	no	no
YDR365C::chr4_7	YDR365C	ESF1	0.628478	-0.107946	0.0835924	0.59745	no	no	no	no
YDR367W::chr4_7	YDR367W	KEI1	-1.21486	-0.787196	0.991862	0.944	no	no	no	no
YDR368W::chr4_7	YDR368W	YPR1	-0.848729	-0.857585	0.950639	0.958041	no	no	no	no
YDR370C::chr4_7	YDR370C	YDR370C	-0.526801	0.308935	0.838969	0.281901	no	yes	no	yes
YDR371W::chr4_7	YDR371W	CTS2	-0.111763	-0.0502302	0.554977	0.552776	no	no	no	no
YDR373W::chr4_7	YDR373W	FRQ1	-0.304408	-0.4128	0.703227	0.80214	no	no	no	no
YDR378C::chr4_7	YDR378C	LSM6	-0.263766	-0.428742	0.673744	0.810786	no	no	no	no
YDR380W::chr4_7	YDR380W	ARO10	-0.326502	0.032232	0.718725	0.487912	no	no	no	no
YDR381W::chr4_7	YDR381W	YRA1	0.473199	0.654314	0.143992	0.103865	no	no	no	no
YDR384C::chr4_7	YDR384C	ATO3	-0.160018	0.394555	0.59379	0.227705	no	no	no	no
YDR386W::chr4_7	YDR386W	MUS81	-0.154832	0.239276	0.589655	0.330141	no	no	no	no
YDR388W::chr4_7	YDR388W	RVS167	0.38009	0.271698	0.191762	0.30727	no	no	no	no
YDR389W::chr4_7	YDR389W	SAC7	0.232191	0.016884	0.28508	0.500012	no	no	no	no
YDR390C::chr4_7	YDR390C	UBA2	0.0402401	0.879381	0.431018	0.0441278	no	no	no	no
YDR391C::chr4_7	YDR391C	YDR391C	-1.11176	-0.635193	0.985775	0.901273	no	no	no	no
YDR393W::chr4_7	YDR393W	SHE9	-0.571195	-0.542083	0.860232	0.86538	no	no	no	no
YDR394W::chr4_7	YDR394W	RPT3	-1.19831	-0.136773	0.991074	0.619333	no	no	no	no
YDR395W::chr4_7	YDR395W	SXM1	-0.658045	-0.242875	0.896101	0.696177	no	no	no	no
YDR396W::chr4_7	YDR396W	YDR396W	0.625203	0.686735	0.0846304	0.0927658	no	no	no	no
YDR399W::chr4_7	YDR399W	HPT1	0.00607347	0.75183	0.458725	0.0731712	no	no	no	no
YDR400W::chr4_7	YDR400W	URH1	-0.395556	-0.0185213	0.764488	0.527906	no	no	no	no
YDR402C::chr4_7	YDR402C	DIT2	-1.38478	0.0428793	0.997034	0.479523	no	no	no	no
YDR403W::chr4_7	YDR403W	DIT1	-0.251166	-0.635193	0.664367	0.901273	no	no	no	no
YDR404C::chr4_7	YDR404C	RPB7	-0.433691	-0.635193	0.787882	0.901273	no	no	no	no
YDR405W::chr4_7	YDR405W	MRP20	-0.459686	-0.760724	0.80302	0.937847	no	no	no	no
YDR406W::chr4_7	YDR406W	PDR15	-0.696726	0.364807	0.909722	0.245842	no	no	no	no
YDR407C::chr4_7	YDR407C	TRS120	0.250807	0.286805	0.272247	0.296857	no	no	no	no
YDR409W::chr4_7	YDR409W	SIZ1	-0.967373	-0.734728	0.970929	0.931304	no	no	no	no
YDR411C::chr4_7	YDR411C	DFM1	-0.275262	1.20131	0.682205	0.00961726	no	no	no	no
YDR412W::chr4_7	YDR412W	RRP17	0.151271	-0.298158	0.34395	0.733259	no	no	no	no
YDR413C::chr4_7	YDR413C	YDR413C	0.136164	-0.0877049	0.355433	0.581896	no	no	no	no
YDR414C::chr4_7	YDR414C	ERD1	-0.0503625	0.557452	0.504869	0.142672	no	no	no	no
YDR416W::chr4_7	YDR416W	SYF1	-0.4528	0.879381	0.799075	0.0441278	no	no	no	no
YDR417C::chr00_17a/chr00_18	YDR417C	YDR417C	-0.0540475	0.498074	0.507886	0.170795	no	no	no	no
YDR419W::chr4_7	YDR419W	RAD30	0.484171	0.601847	0.138944	0.123813	no	no	no	no
YDR420W::chr4_7	YDR420W	HKR1	0.714208	0.0652471	0.0597007	0.461935	no	no	no	no
YDR421W::chr4_7	YDR421W	ARO80	0.704525	0.660263	0.0620959	0.101759	no	no	no	no
YDR423C::chr4_7	YDR423C	CAD1	-0.749193	-0.465268	0.926017	0.829702	no	no	no	no
YDR424C::chr00_8	YDR424C	DYN2	-0.633716	0.0652471	0.886803	0.461935	no	no	no	no
YDR425W::chr4_7	YDR425W	SNX41	0.0037142	-0.934753	0.460648	0.970008	no	no	no	no
YDR426C::chr4_7	YDR426C	YDR426C	-0.626336	0.00223727	0.883869	0.511559	no	no	no	no
YDR427W::chr00_11	YDR427W	RPN9	0.665845	0.490338	0.0724186	0.174703	no	no	no	no
YDR427W::chr4_7	YDR427W	RPN9	-0.393534	-0.54773	0.763209	0.867783	no	no	no	no
YDR428C::chr4_7	YDR428C	BNA7	-0.526801	0.0428793	0.838969	0.479523	no	no	no	no
YDR429C::chr4_7	YDR429C	TIF35	-0.16423	1.2128	0.59714	0.00904734	no	no	no	no
YDR430C::chr4_7	YDR430C	CYM1	0.118105	0.543145	0.369333	0.149144	no	no	no	no
YDR431W::chr4_7	YDR431W	YDR431W	-0.470217	1.06525	0.808961	0.0191312	no	no	no	no
YDR432W::chr4_7	YDR432W	NPL3	-0.0122273	-0.705582	0.473658	0.923349	no	no	no	no
YDR433W::chr4_7	YDR433W	YDR433W	0.395197	0.286805	0.183414	0.296857	no	no	no	no
YDR434W::chr4_7	YDR434W	GPI17	0.225272	-0.279049	0.289922	0.720703	no	no	no	no
YDR435C::chr4_7	YDR435C	PPM1	0.0326269	1.30894	0.437168	0.00532963	no	yes	no	yes
YDR436W::chr4_7	YDR436W	PPZ2	-0.572604	-0.488351	0.860874	0.841009	no	no	no	no
YDR441C::chr4_8	YDR441C	APT2	-0.263766	-0.564803	0.673744	0.87487	no	no	no	no
YDR442W::chr4_8	YDR442W	YDR442W	0.321196	1.67151	0.226469	0.000537195	no	yes	no	yes
YDR444W::chr00_17a	YDR444W	YDR444W	-0.941838	-0.898227	0.967278	0.964753	no	no	no	no
YDR445C::chr00_14	YDR445C	YDR445C	-0.604803	0.032232	0.875	0.487912	no	no	no	no
YDR452W::chr4_8	YDR452W	PPN1	-0.126263	0.708762	0.566713	0.0857424	no	no	no	no
YDR454C::chr4_8	YDR454C	GUK1	-0.363302	-0.287269	0.743638	0.72614	no	no	no	no
YDR455C::chr4_8	YDR455C	YDR455C	-0.526801	1.02777	0.838969	0.0228603	no	no	no	no
YDR461W::chr00_17a	YDR461W	MFA1	-0.187999	0.0906324	0.615905	0.442066	no	no	no	no
YDR463W::chr4_8	YDR463W	STP1	-0.560748	0.297693	0.855408	0.289453	no	no	no	no
YDR465C::chr4_8	YDR465C	RMT2	-0.304408	-0.827838	0.703227	0.952501	no	no	no	no
YDR466W::chr4_8	YDR466W	PKH3	-1.29939	-0.372158	0.995005	0.779042	no	no	no	no
YDR467C::chr4_8	YDR467C	YDR467C	0.473199	0.130342	0.143992	0.411294	no	no	no	no
YDR469W::chr4_8	YDR469W	SDC1	0.23616	-0.734728	0.28232	0.931304	no	no	no	no
YDR473C::chr4_8	YDR473C	PRP3	0.41976	0.33784	0.170332	0.262932	no	no	no	no
YDR475C::chr4_8	YDR475C	JIP4	-0.889371	-0.4128	0.958586	0.80214	no	no	no	no
YDR476C::chr4_8	YDR476C	YDR476C	-0.67119	-0.635193	0.900888	0.901273	no	no	no	no
YDR480W::chr4_8	YDR480W	DIG2	1.28055	-0.220155	0.0032653	0.680297	no	no	no	no
YDR484W::chr4_8	YDR484W	VPS52	0.851711	1.06525	0.0329167	0.0191312	no	no	no	no
YDR486C::chr4_8	YDR486C	VPS60	-1.26377	1.67151	0.993844	0.000537195	no	yes	no	yes
YDR487C::chr4_8	YDR487C	RIB3	-0.281688	-0.0946243	0.686894	0.587229	no	no	no	no
YDR490C::chr4_8	YDR490C	PKH1	-0.626336	-0.702307	0.883869	0.922413	no	no	no	no
YDR493W::chr00_17a	YDR493W	MZM1	-0.324308	-0.149766	0.717204	0.629076	no	no	no	no
YDR495C::chr4_8	YDR495C	VPS3	-0.526801	0.119695	0.838969	0.4195	no	no	no	no
YDR496C::chr4_8	YDR496C	PUF6	0.385737	0.364807	0.188615	0.245842	no	no	no	no
YDR497C::chr4_8	YDR497C	ITR1	-0.384782	0.779845	0.757629	0.0657846	no	no	no	no
YDR498C::chr00_17a	YDR498C	SEC20	-0.789835	-0.428742	0.937014	0.810786	no	no	no	no
YDR499W::chr4_8	YDR499W	LCD1	0.0469347	0.11688	0.425625	0.421675	no	no	no	no
YDR500C::chr00_17a	YDR500C	RPL37B	-0.806908	0.172162	0.941235	0.37947	no	no	no	no
YDR502C::chr00_17a	YDR502C	SAM2	0.232191	0.161274	0.28508	0.387687	no	no	no	no
YDR506C::chr00_17a	YDR506C	GMC1	-0.318214	-0.256681	0.712958	0.705651	no	no	no	no
YDR509W::chr4_8	YDR509W	YDR509W	-0.472353	-0.272623	0.810153	0.716417	no	no	no	no
YDR512C::chr00_17a	YDR512C	EMI1	-1.28169	-0.220155	0.994455	0.680297	no	no	no	no
YDR512C::chr4_8	YDR512C	EMI1	-0.587342	0.172162	0.867469	0.37947	no	no	no	no
YDR513W::chr4_8	YDR513W	GRX2	0.115647	-0.0275101	0.371238	0.534971	no	no	no	no
YDR515W::chr00_17a	YDR515W	SLF1	-0.544722	0.599273	0.847794	0.124857	no	no	no	no
YDR519W::chr4_8	YDR519W	FPR2	-0.76384	-0.4128	0.930138	0.80214	no	no	no	no
YDR522C::chr4_8	YDR522C	SPS2	-0.191197	0.7708	0.61841	0.0681036	no	no	no	no
YDR523C::chr4_8	YDR523C	SPS1	-0.441912	-0.206349	0.792741	0.670482	no	no	no	no
YDR525W-A::chr00_2	YDR525W-A	SNA2	0.707665	1.82351	0.0613111	0.000178004	no	yes	no	yes
YDR525W::chr4_8	YDR525W	API2	-0.705138	0.612735	0.912501	0.119467	no	no	no	no
YDR526C::chr00_17a	YDR526C	YDR526C	-0.905312	0.364807	0.961405	0.245842	no	no	no	no
YDR527W::chr4_8	YDR527W	RBA50	-0.211927	0.94977	0.634525	0.0326065	no	no	no	no
YDR528W::chr4_8	YDR528W	HLR1	1.01634	0.867308	0.0147214	0.0463999	no	no	no	no
YDR534C::chr4_8	YDR534C	FIT1	-0.237294	-0.234655	0.653923	0.690472	no	no	no	no
YDR536W::chr00_2	YDR536W	STL1	0.058162	0.212804	0.416611	0.349303	no	no	no	no
YDR537C::chr00_14	YDR537C	YDR537C	-0.4654	-1.05023	0.806257	0.982534	no	no	no	no
YDR538W::chr00_2	YDR538W	PAD1	0.351209	-0.795657	0.208357	0.945863	no	no	no	no
YEL001C::chr5_2	YEL001C	IRC22	0.526311	0.417919	0.120683	0.214004	no	no	no	no
YEL002C::chr5_2	YEL002C	WBP1	-0.321981	-0.24817	0.715586	0.699826	no	no	no	no
YEL003W::chr5_2	YEL003W	GIM4	0.326358	-0.734728	0.223293	0.931304	no	no	no	no
YEL005C::chr5_2	YEL005C	VAB2	-1.05405	-1.19159	0.980893	0.991542	no	no	no	no
YEL006W::chr5_2	YEL006W	YEA6	-0.487813	-1.3067	0.81864	0.995552	no	no	no	no
YEL009C::chr5_2	YEL009C	GCN4	0.241026	-0.149766	0.278954	0.629076	no	no	no	no
YEL010W::chr5_2	YEL010W	YEL010W	0.965053	0.608733	0.0191224	0.121052	no	no	no	no
YEL012W::chr00_10	YEL012W	UBC8	0.795128	0.879381	0.0424079	0.0441278	no	no	no	no
YEL013W::chr5_2	YEL013W	VAC8	0.845168	0.239276	0.0339157	0.330141	no	no	no	no
YEL014C::chr5_2	YEL014C	YEL014C	-0.0243002	1.13034	0.48353	0.013879	no	no	no	no
YEL018W::chr5_2	YEL018W	EAF5	0.753307	0.282345	0.0507573	0.299914	no	no	no	no
YEL023C::chr5_2	YEL023C	YEL023C	0.075864	-0.184531	0.402489	0.65473	no	no	no	no
YEL024W::chr5_2	YEL024W	RIP1	0.648286	0.101773	0.0775177	0.433389	no	no	no	no
YEL026W::chr5_2	YEL026W	SNU13	-1.34992	-0.519715	0.996318	0.855565	no	no	no	no
YEL028W::chr5_2	YEL028W	YEL028W	-0.0573152	0.671505	0.510562	0.0978651	no	yes	no	yes
YEL029C::chr5_2	YEL029C	BUD16	0.232191	-0.0826516	0.28508	0.577992	no	no	no	no
YEL031W::chr5_2	YEL031W	SPF1	-0.334155	-0.149766	0.724002	0.629076	no	no	no	no
YEL034W::chr00_8	YEL034W	HYP2	1.83998	0.979517	5.48072e-05	0.0285471	no	no	yes	no
YEL036C::chr5_2	YEL036C	ANP1	0.0402401	1.68674	0.431018	0.000482757	no	no	no	yes
YEL037C::chr5_2	YEL037C	RAD23	-0.986232	-0.400727	0.973403	0.795435	no	no	no	no
YEL038W::chr5_2	YEL038W	UTR4	-0.233069	-0.635193	0.650719	0.901273	no	no	no	no
YEL039C::chr5_2	YEL039C	CYC7	0.532093	0.308224	0.118315	0.282377	no	no	no	no
YEL040W::chr5_2	YEL040W	UTR2	-0.648791	-0.869658	0.892632	0.960135	no	no	no	no
YEL042W::chr5_2	YEL042W	GDA1	-0.111763	-0.805118	0.554977	0.947886	no	no	no	no
YEL043W::chr5_2	YEL043W	YEL043W	0.795128	-0.0787993	0.0424079	0.57501	no	no	no	no
YEL044W::chr5_2	YEL044W	IES6	0.580115	0.712731	0.0999165	0.0845203	no	no	no	no
YEL047C::chr5_2	YEL047C	YEL047C	-0.174499	-0.120619	0.605277	0.607113	no	no	no	no
YEL048C::chr5_2	YEL048C	TCA17	0.0443562	-0.578609	0.4277	0.880403	no	no	no	no
YEL050C::chr5_2	YEL050C	RML2	-0.243008	0.5872	0.65824	0.129832	no	no	no	no
YEL051W::chr5_2	YEL051W	VMA8	0.366284	0.743319	0.199592	0.0755368	no	no	no	no
YEL053C::chr5_2	YEL053C	MAK10	-0.433691	-0.220155	0.787882	0.680297	no	no	no	no
YEL054C::chr5_2	YEL054C	RPL12A	0.473199	0.0566851	0.143992	0.468661	no	no	no	no
YEL055C::chr5_2	YEL055C	POL5	0.299868	0.112041	0.239864	0.42542	no	no	no	no
YEL056W::chr5_2	YEL056W	HAT2	0.695592	0.657589	0.0643715	0.102702	no	no	no	no
YEL057C::chr5_2	YEL057C	YEL057C	0.151271	-0.0502302	0.34395	0.552776	no	no	no	no
YEL058W::chr5_2	YEL058W	PCM1	0.345444	0.797767	0.211769	0.0613712	no	no	no	no
YEL060C::chr5_2	YEL060C	PRB1	-0.696726	-0.372158	0.909722	0.779042	no	no	no	no
YEL061C::chr5_2	YEL061C	CIN8	-0.159069	-0.220155	0.593034	0.680297	no	no	no	no
YEL062W::chr5_2	YEL062W	NPR2	0.0137679	-0.722655	0.452463	0.92809	no	no	no	no
YEL063C::chr5_2	YEL063C	CAN1	-1.11176	0.308935	0.985775	0.281901	no	yes	no	yes
YEL065W::chr5_2	YEL065W	SIT1	-0.941838	-0.857585	0.967278	0.958041	no	no	no	no
YEL067C::chr5_2	YEL067C	YEL067C	-0.459686	1.96101	0.80302	6.08968e-05	no	yes	no	yes
YEL071W::chr5_2	YEL071W	DLD3	-0.132522	0.364807	0.571761	0.245842	no	no	no	no
YEL072W::chr5_2	YEL072W	RMD6	0.0163418	0.336793	0.450371	0.263608	no	no	no	no
YER004W::chr5_2	YER004W	FMP52	-0.16423	-0.202233	0.59714	0.667532	no	no	no	no
YER005W::chr5_2	YER005W	YND1	0.411799	0.18793	0.174505	0.367667	no	no	no	no
YER006W::chr5_2	YER006W	NUG1	-0.408156	-0.709193	0.772371	0.924371	no	no	no	no
YER007W::chr5_2	YER007W	PAC2	-0.0793415	-0.272623	0.528577	0.716417	no	no	no	no
YER009W::chr5_2	YER009W	NTF2	0.347669	0.824239	0.210448	0.0552794	no	no	no	no
YER011W::chr5_2	YER011W	TIR1	-0.559222	0.123799	0.854695	0.416332	no	no	no	no
YER014W::chr5_2	YER014W	HEM14	0.058162	-0.165707	0.416611	0.640919	no	no	no	no
YER016W::chr5_3	YER016W	BIM1	-0.122904	0.0906324	0.563999	0.442066	no	no	no	no
YER017C::chr5_3	YER017C	AFG3	0.01752	-0.0908721	0.449414	0.584339	no	no	no	no
YER018C::chr5_3	YER018C	SPC25	0.580115	0.00223727	0.0999165	0.511559	no	no	no	no
YER019W::chr5_3	YER019W	ISC1	-0.0875155	-0.0681521	0.535249	0.566748	no	no	no	no
YER021W::chr5_3	YER021W	RPN3	-0.386623	-0.339737	0.758808	0.759558	no	no	no	no
YER022W::chr5_3	YER022W	SRB4	0.058162	-0.187734	0.416611	0.657059	no	no	no	no
YER023W::chr5_3	YER023W	PRO3	-0.296188	0.016884	0.697363	0.500012	no	no	no	no
YER024W::chr5_3	YER024W	YAT2	-1.64228	-1.50966	0.999481	0.998724	no	no	no	no
YER027C::chr5_3	YER027C	GAL83	-0.139777	0.867308	0.577599	0.0463999	no	no	no	no
YER028C::chr5_3	YER028C	MIG3	-0.0446488	1.01688	0.50019	0.0240523	no	no	no	no
YER030W::chr5_3	YER030W	CHZ1	-0.437533	0.838739	0.790162	0.0521512	no	no	no	no
YER032W::chr5_3	YER032W	FIR1	0.238734	0.75183	0.280537	0.0731712	no	no	no	no
YER033C::chr5_3	YER033C	ZRG8	-0.334155	-0.857585	0.724002	0.958041	no	no	no	no
YER034W::chr5_3	YER034W	YER034W	-0.248084	0.0506988	0.662058	0.473369	no	no	no	no
YER035W::chr5_3	YER035W	EDC2	0.193092	0.297693	0.312933	0.289453	no	no	no	no
YER036C::chr5_3	YER036C	ARB1	0.366284	0.863613	0.199592	0.0471136	no	no	no	no
YER037W::chr00_11	YER037W	PHM8	-0.971585	-1.10912	0.971498	0.986978	no	no	no	no
YER038C::chr5_3	YER038C	KRE29	0.127425	-0.298158	0.362137	0.733259	no	no	no	no
YER038W-A::chr5_3	YER038W-A	YER038W-A	0.0469347	0.0428793	0.425625	0.479523	no	no	no	no
YER039C-A::chr00_2	YER039C-A	YER039C-A	-0.254721	0.905376	0.667023	0.0395399	no	no	no	no
YER040W::chr5_3	YER040W	GLN3	-0.0950843	0.315898	0.541419	0.277272	no	no	no	no
YER041W::chr5_3	YER041W	YEN1	-1.06737	-1.69932	0.982131	0.999653	no	no	no	no
YER042W::chr5_3	YER042W	MXR1	-0.315296	0.502311	0.710914	0.168678	no	no	no	no
YER043C::chr5_3	YER043C	SAH1	1.53209	0.308224	0.000605594	0.282377	no	no	yes	no
YER044C-A::chr5_3	YER044C-A	MEI4	0.368863	-0.0137043	0.198115	0.524116	no	no	no	no
YER044C::chr5_3	YER044C	ERG28	-0.456411	0.5872	0.80115	0.129832	no	no	no	no
YER045C::chr5_3	YER045C	ACA1	-0.0177869	0.0506988	0.478202	0.473369	no	no	no	no
YER046W-A::chr5_3	YER046W-A	YER046W-A	-0.221946	1.17216	0.642231	0.011205	no	no	no	no
YER048C::chr5_3	YER048C	CAJ1	-0.22724	0.364807	0.64628	0.245842	no	no	no	no
YER048W-A::chr00_2	YER048W-A	ISD11	0.473199	-0.459343	0.143992	0.826719	no	no	no	no
YER050C::chr5_3	YER050C	RSM18	0.942685	-0.787196	0.0213668	0.944	no	no	no	no
YER051W::chr5_3	YER051W	JHD1	0.0861764	-0.742108	0.394319	0.933213	no	no	no	no
YER052C::chr5_3	YER052C	HOM3	1.11706	0.101773	0.00855697	0.433389	no	no	no	no
YER054C::chr5_3	YER054C	GIP2	0.625203	-0.313265	0.0846304	0.74298	no	no	no	no
YER055C::chr5_3	YER055C	HIS1	0.860223	-0.355085	0.0316536	0.768896	no	no	no	no
YER056C-A::chr5_3	YER056C-A	RPL34A	0.058162	-0.0502302	0.416611	0.552776	no	no	no	no
YER057C::chr5_3	YER057C	HMF1	0.298113	0.675147	0.240985	0.0966274	no	no	no	no
YER058W::chr5_3	YER058W	PET117	-0.450179	-0.236643	0.797561	0.691856	no	no	no	no
YER059W::chr5_3	YER059W	PCL6	0.390737	0.45227	0.185854	0.194757	no	no	no	no
YER060W::chr5_3	YER060W	FCY21	0.525667	-0.287269	0.120949	0.72614	no	no	no	no
YER061C::chr5_3	YER061C	CEM1	-0.467907	0.00866354	0.807667	0.506493	no	no	no	no
YER062C::chr5_3	YER062C	HOR2	0.22384	0.33784	0.290929	0.262932	no	no	no	no
YER063W::chr00_10	YER063W	THO1	0.361307	0.0710761	0.202461	0.457363	no	no	no	no
YER064C::chr00_8	YER064C	VHR2	-0.218678	-0.934753	0.639724	0.970008	no	no	no	no
YER065C::chr5_3	YER065C	ICL1	0.0037142	0.480285	0.460648	0.179868	no	no	no	no
YER066W::chr00_10	YER066W	RRT13	-1.05732	-0.787196	0.981203	0.944	no	no	no	no
YER067C-A::chr5_3	YER067C-A	YER067C-A	-0.325167	0.18793	0.7178	0.367667	no	no	no	no
YER067W::chr5_3	YER067W	RGI1	-0.0122273	-0.120619	0.473658	0.607113	no	no	no	no
YER068C-A::chr5_3	YER068C-A	YER068C-A	0.366284	1.48028	0.199592	0.0019119	no	no	no	no
YER069W::chr5_3	YER069W	ARG5,6	0.187797	0.557452	0.316793	0.142672	no	no	no	no
YER070W::chr5_3	YER070W	RNR1	0.250807	0.490338	0.272247	0.174703	no	no	no	no
YER071C::chr5_3	YER071C	TDA2	0.187797	0.11688	0.316793	0.421675	no	no	no	no
YER074W::chr5_3	YER074W	RPS24A	0.51502	0.793651	0.125401	0.0623638	no	no	no	no
YER077C::chr00_8	YER077C	YER077C	0.0326269	-1.22016	0.437168	0.992757	no	no	no	no
YER078C::chr00_8	YER078C	ICP55	0.171544	0.398755	0.328767	0.225206	no	no	no	no
YER080W::chr5_3	YER080W	AIM9	-0.218678	0.743319	0.639724	0.0755368	no	no	no	no
YER083C::chr5_3	YER083C	GET2	-0.419885	-0.149766	0.779574	0.629076	no	no	no	no
YER086W::chr5_3	YER086W	ILV1	-1.26377	-0.787196	0.993844	0.944	no	no	no	no
YER087C-A::chr5_3	YER087C-A	YER087C-A	-0.609263	-0.717655	0.876875	0.926725	no	no	no	no
YER088C::chr00_8	YER088C	DOT6	-0.292335	0.101773	0.694597	0.433389	no	no	no	no
YER089C::chr00_17a	YER089C	PTC2	0.0913288	-0.175761	0.390254	0.648319	no	no	no	no
YER090W::chr00_8	YER090W	TRP2	-0.16423	0.286805	0.59714	0.296857	no	no	no	no
YER091C-A::chr00_2	YER091C-A	YER091C-A	0.656064	0.435197	0.0752264	0.204188	no	no	no	no
YER092W::chr00_8	YER092W	IES5	-1.0293	-1.37216	0.978399	0.996978	no	no	no	no
YER093C-A::chr00_8	YER093C-A	AIM11	-0.363302	0.00223727	0.743638	0.511559	no	no	no	no
YER095W::chr00_8	YER095W	RAD51	-0.243008	-0.0757652	0.65824	0.572659	no	no	no	no
YER096W::chr00_8	YER096W	SHC1	-0.526801	0.627842	0.838969	0.113617	no	no	no	no
YER098W::chr00_8	YER098W	UBP9	-0.111763	-1.05023	0.554977	0.982534	no	no	no	no
YER101C::chr00_5	YER101C	AST2	-0.346228	0.644915	0.732224	0.107255	no	no	no	no
YER103W::chr00_5	YER103W	SSA4	-0.304408	-0.4128	0.703227	0.80214	no	no	no	no
YER106W::chr00_5	YER106W	MAM1	0.058162	0.571258	0.416611	0.13661	no	no	no	no
YER107C::chr00_5	YER107C	GLE2	0.566309	0.557452	0.104978	0.142672	no	no	no	no
YER108C::chr00_5	YER109C	FLO8	0.410464	0.769198	0.175211	0.0685208	no	no	no	no
YER109C::chr00_5	YER109C	FLO8	0.159091	-0.180627	0.338062	0.651881	no	no	no	no
YER110C::chr00_5	YER110C	KAP123	0.510674	-0.104678	0.127251	0.594948	no	no	no	no
YER111C::chr00_5	YER111C	SWI4	0.232191	0.502311	0.28508	0.168678	no	no	no	no
YER112W::chr00_5	YER112W	LSM4	0.228087	0.0753007	0.287947	0.454052	no	no	no	no
YER113C::chr00_5	YER113C	TMN3	-0.0813894	0.11688	0.530249	0.421675	no	no	no	no
YER114C::chr00_5	YER114C	BOI2	0.210165	0.464343	0.300626	0.188251	no	no	no	no
YER118C::chr00_5	YER118C	SHO1	-0.774728	-0.220155	0.933085	0.680297	no	no	no	no
YER121W::chr00_5	YER121W	YER121W	0.625203	-0.48319	0.0846304	0.838524	no	no	no	no
YER123W::chr00_5	YER123W	YCK3	0.257471	0.149079	0.267724	0.39695	no	no	no	no
YER127W::chr00_5	YER127W	LCP5	-0.0979572	0.0346587	0.543758	0.485999	no	no	no	no
YER128W::chr00_5	YER128W	VFA1	0.326358	-0.528277	0.223293	0.859377	no	no	no	no
YER129W::chr00_5	YER129W	SAK1	0.659613	0.94977	0.0741981	0.0326065	no	no	no	no
YER131W::chr00_5	YER131W	RPS26B	0.888237	0.94977	0.0277759	0.0326065	no	no	no	no
YER132C::chr00_5	YER132C	PMD1	0.630741	0.637826	0.0828808	0.109865	no	no	no	no
YER134C::chr00_5	YER134C	YER134C	-1.72882	-1.13677	0.999728	0.988702	no	no	no	no
YER135C::chr00_5	YER135C	YER135C	-0.684342	-1.39418	0.905514	0.997356	no	no	no	no
YER136W::chr00_5	YER136W	GDI1	0.110629	1.17216	0.375138	0.011205	no	no	no	no
YER137C::chr00_5	YER137C	YER137C	-0.0461747	-0.535657	0.50144	0.862608	no	no	no	no
YER140W::chr00_5	YER140W	YER140W	-1.01223	-0.120619	0.976522	0.607113	no	no	no	no
YER141W::chr00_5	YER141W	COX15	-0.642278	-0.220155	0.890141	0.680297	no	no	no	no
YER142C::chr00_5	YER142C	MAG1	-0.111763	0.50158	0.554977	0.169041	no	yes	no	yes
YER144C::chr00_2	YER144C	UBP5	-0.0243002	0.45227	0.48353	0.194757	no	no	no	no
YER145C::chr00_5	YER145C	FTR1	0.110629	-0.943315	0.375138	0.971141	no	no	no	no
YER146W::chr00_5	YER146W	LSM5	-0.154832	0.961012	0.589655	0.0310197	no	yes	no	yes
YER149C::chr00_5	YER149C	PEA2	1.3212	-0.109124	0.00252907	0.598351	no	no	no	no
YER150W::chr00_5	YER150W	SPI1	0.238734	0.130342	0.280537	0.411294	no	no	no	no
YER151C::chr00_5	YER151C	UBP3	-0.696726	0.364807	0.909722	0.245842	no	no	no	no
YER153C::chr00_5	YER153C	PET122	-1.17888	0.172162	0.990065	0.37947	no	no	no	no
YER154W::chr00_5	YER154W	OXA1	-0.0122273	0.101773	0.473658	0.433389	no	no	no	no
YER155C::chr00_5	YER155C	BEM2	0.312735	-0.54773	0.231732	0.867783	no	no	no	no
YER157W::chr00_5	YER157W	COG3	1.23873	0.45227	0.0042189	0.194757	no	no	no	no
YER159C::chr00_5	YER159C	BUR6	0.947131	0.364807	0.0209037	0.245842	no	no	no	no
YER161C::chr00_5	YER161C	SPT2	0.473199	0.364807	0.143992	0.245842	no	no	no	no
YER163C::chr00_5	YER163C	YER163C	0.0350784	0.511649	0.435186	0.164072	no	no	no	no
YER165W::chr00_5	YER165W	PAB1	-0.789835	1.2717	0.937014	0.0065677	no	no	no	no
YER166W::chr00_5	YER166W	DNF1	0.532093	0.201309	0.118315	0.357749	no	no	no	no
YER167W::chr00_5	YER167W	BCK2	0.0137679	-0.957121	0.452463	0.972893	no	no	no	no
YER168C::chr00_5	YER168C	CCA1	1.30894	1.30894	0.00273357	0.00532963	yes	yes	yes	yes
YER169W::chr00_5	YER169W	RPH1	-0.0769976	0.5872	0.526662	0.129832	no	no	no	no
YER170W::chr00_5	YER170W	ADK2	0.617589	0.94977	0.0870804	0.0326065	no	no	no	no
YER171W::chr00_5	YER171W	RAD3	-1.01619	-0.979147	0.976969	0.975504	no	no	no	no
YER173W::chr00_5	YER173W	RAD24	0.23616	0.172162	0.28232	0.37947	no	no	no	no
YER174C::chr00_5	YER174C	GRX4	0.40711	1.19488	0.176993	0.00994934	no	no	no	no
YER179W::chr00_5	YER179W	DMC1	-0.0243002	0.45227	0.48353	0.194757	no	no	no	no
YER180C::chr00_5	YER180C	ISC10	-0.414326	-0.220155	0.776176	0.680297	no	no	no	no
YER181C::chr00_5	YER181C	YER181C	0.0137679	-0.335632	0.452463	0.757026	no	no	no	no
YER182W::chr00_5	YER182W	FMP10	-0.384782	0.0428793	0.757629	0.479523	no	no	no	no
YER183C::chr00_5	YER183C	FAU1	0.266749	-0.394185	0.261491	0.791746	no	no	no	no
YER184C::chr00_5	YER184C	YER184C	-0.812203	-0.220155	0.942498	0.680297	no	no	no	no
YER185W::chr00_5	YER185W	PUG1	0.393029	-0.260797	0.184598	0.708449	no	no	no	no
YER187W::chr00_5	YER187W	YER187W	0.173639	-0.841644	0.327213	0.955141	no	no	no	no
YFL001W::chr00_17a	YFL001W	DEG1	-0.728821	-0.721736	0.919979	0.92784	no	no	no	no
YFL003C::chr00_17a	YFL003C	MSH4	0.280554	0.233563	0.252356	0.334242	no	no	no	no
YFL004W::chr00_17a	YFL004W	VTC2	-0.433691	0.163173	0.787882	0.386249	no	no	no	no
YFL005W::chr00_17a	YFL005W	SEC4	-0.566329	-0.165707	0.857999	0.640919	no	no	no	no
YFL007W::chr00_17a	YFL007W	BLM10	0.0206873	0.290807	0.446842	0.294126	no	no	no	no
YFL008W::chr6_1	YFL008W	SMC1	0.0371004	0.130342	0.433552	0.411294	no	no	no	no
YFL010C::chr00_17a	YFL010C	WWM1	-0.0413737	0.172162	0.497508	0.37947	no	no	no	no
YFL011W::chr6_1	YFL011W	HXT10	-0.152405	-0.0294716	0.587717	0.536512	no	no	no	no
YFL013C::chr00_17a	YFL013C	IES1	0.473199	0.464343	0.143992	0.188251	no	no	no	no
YFL013W-A::chr00_15	YFL013W-A	YFL013W-A	0.058162	-1.50966	0.416611	0.998724	no	no	no	no
YFL015C::chr6_1	YFL015C	YFL015C	-0.389297	-0.345686	0.760516	0.763202	no	no	no	no
YFL016C::chr00_17a	YFL016C	MDJ1	-1.11176	-0.635193	0.985775	0.901273	no	no	no	no
YFL019C::chr00_15	YFL019C	YFL019C	-0.941838	-1.22016	0.967278	0.992757	no	no	no	no
YFL021W::chr6_1	YFL021W	GAT1	0.176218	0.101773	0.325305	0.433389	no	no	no	no
YFL022C::chr6_1	YFL022C	FRS2	0.214887	0.789305	0.297261	0.0634252	no	no	no	no
YFL024C::chr6_1	YFL024C	EPL1	-0.613344	-0.721736	0.878573	0.92784	no	no	no	no
YFL026W::chr6_1	YFL026W	STE2	-0.297319	0.130342	0.698173	0.411294	no	no	no	no
YFL029C::chr00_18	YFL029C	CAK1	0.512728	-0.258629	0.126375	0.706977	no	no	no	no
YFL030W::chr6_1	YFL030W	AGX1	0.389542	0.907335	0.186512	0.0392105	no	no	no	no
YFL033C::chr00_17a/chr00_18	YFL033C	RIM15	-0.273044	-0.435884	0.68058	0.814583	no	no	no	no
YFL035C-A::chr6_1	YFL034C-B	MOB2	-0.204872	0.227304	0.629066	0.338756	no	no	no	no
YFL037W::chr6_1	YFL037W	TUB2	0.572735	-0.428742	0.102599	0.810786	no	no	no	no
YFL038C::chr6_1	YFL038C	YPT1	-0.493634	-0.497689	0.821773	0.84544	no	no	no	no
YFL040W::chr6_1	YFL040W	YFL040W	-0.221946	-0.287269	0.642231	0.72614	no	no	no	no
YFL041W::chr6_1	YFL041W	FET5	0.848709	0.701842	0.0333721	0.0879045	no	no	no	no
YFL042C::chr00_15	YFL042C	YFL042C	0.473199	0.282345	0.143992	0.299914	no	no	no	no
YFL043C::chr6_1	YFL042C	YFL042C	0.133713	-0.635193	0.357309	0.901273	no	no	no	no
YFL044C::chr6_1	YFL044C	OTU1	-0.0293009	-0.857585	0.487623	0.958041	no	no	no	no
YFL045C::chr6_1	YFL045C	SEC53	0.517594	0.824239	0.124315	0.0552794	no	no	no	no
YFL046W::chr6_1	YFL046W	FMP32	0.0257405	-0.544995	0.442743	0.866623	no	no	no	no
YFL049W::chr6_1	YFL049W	SWP82	0.728457	0.114829	0.0563083	0.423262	no	no	no	no
YFL053W::chr6_1	YFL053W	DAK2	-0.4654	0.142415	0.806257	0.402037	no	no	no	no
YFL054C::chr6_1	YFL054C	YFL054C	-0.369259	-0.300774	0.74756	0.734956	no	no	no	no
YFL055W::chr6_1	YFL055W	AGP3	-0.301241	0.153303	0.700974	0.393734	no	no	no	no
YFL063W::chr00_18	YFL063W	YFL063W	-0.414326	-0.635193	0.776176	0.901273	no	no	no	no
YFR001W::chr6_1	YFR001W	LOC1	0.888237	0.862307	0.0277759	0.0473681	no	no	no	no
YFR002W::chr00_18	YFR002W	NIC96	-0.423707	-0.0991398	0.781892	0.5907	no	no	no	no
YFR003C::chr6_1	YFR003C	YPI1	0.366284	0.743319	0.199592	0.0755368	no	no	no	no
YFR004W::chr6_1	YFR004W	RPN11	0.221661	0.94977	0.292464	0.0326065	no	no	no	no
YFR007W::chr6_1	YFR007W	YFH7	0.411799	-0.281556	0.174505	0.722367	no	no	no	no
YFR011C::chr00_16b	YFR011C	AIM13	-2.7563	-2.72174	1	1	no	no	no	no
YFR013W::chr00_16b	YFR013W	IOC3	0.473199	0.743319	0.143992	0.0755368	no	no	no	no
YFR014C::chr6_1	YFR014C	CMK1	-0.935272	-0.458701	0.96628	0.826394	no	no	no	no
YFR017C::chr6_1	YFR017C	IGD1	0.473199	0.227304	0.143992	0.338756	no	no	no	no
YFR018C::chr6_1	YFR018C	YFR018C	-0.652331	-0.635193	0.893969	0.901273	no	no	no	no
YFR020W::chr6_1	YFR020W	YFR020W	-0.292335	0.227304	0.694597	0.338756	no	no	no	no
YFR022W::chr6_1	YFR022W	ROG3	-0.0186536	-0.127046	0.478911	0.611987	no	no	no	no
YFR023W::chr6_1	YFR023W	PES4	-0.178877	-0.734728	0.608733	0.931304	no	no	no	no
YFR024C-A::chr6_1	YFR024C-A	LSB3	-0.829363	-0.898227	0.946445	0.964753	no	no	no	no
YFR024C::chr00_15	YFR024C-A	LSB3	0.0946879	-0.313265	0.387611	0.74298	no	no	no	no
YFR026C::chr6_1	YFR026C	ULI1	0.327349	0.395834	0.222686	0.226942	no	no	no	no
YFR027W::chr6_1	YFR027W	ECO1	-1.25263	-0.519715	0.993434	0.855565	no	no	no	no
YFR028C::chr00_15	YFR028C	CDC14	-0.719446	0.172162	0.917079	0.37947	no	no	no	no
YFR029W::chr00_15	YFR029W	PTR3	0.255608	0.398755	0.268985	0.225206	no	no	no	no
YFR030W::chr00_15	YFR030W	MET10	0.373664	-0.635193	0.195383	0.901273	no	no	no	no
YFR031C-A::chr6_1	YFR031C-A	RPL2A	-0.789835	0.51681	0.937014	0.161561	no	no	no	no
YFR031C::chr00_15	YFR031C	SMC2	0.631897	-0.137693	0.0825189	0.620025	no	no	no	no
YFR032C-A::chr00_2	YFR032C-A	RPL29	-0.0673689	-0.760724	0.518789	0.937847	no	no	no	no
YFR032C::chr00_2	YFR032C	RRT5	1.22704	0.983717	0.00452682	0.0280093	no	no	no	no
YFR033C::chr00_2	YFR033C	QCR6	-1.22195	-1.19707	0.99218	0.991789	no	no	no	no
YFR034C::chr00_2	YFR034C	PHO4	0.842433	-0.00292444	0.0343406	0.515627	no	no	no	no
YFR037C::chr00_2	YFR037C	RSC8	0.695592	2.63086	0.0643715	1.19303e-07	no	yes	no	yes
YFR040W::chr00_2	YFR040W	SAP155	-0.848729	-0.0946243	0.950639	0.587229	no	no	no	no
YFR041C::chr00_2	YFR041C	ERJ5	-0.848729	-1.37216	0.950639	0.996978	no	no	no	no
YFR042W::chr00_2	YFR042W	KEG1	0.625203	0.163173	0.0846304	0.386249	no	no	no	no
YFR044C::chr00_2	YFR044C	DUG1	-0.213643	0.0785032	0.635849	0.451545	no	no	no	no
YFR045W::chr00_2	YFR045W	YFR045W	-1.04137	-0.635193	0.979648	0.901273	no	no	no	no
YFR046C::chr00_2	YFR046C	CNN1	0.0194815	0.566441	0.447821	0.138705	no	no	no	no
YFR047C::chr00_2	YFR047C	BNA6	-0.0122273	-1.0137	0.473658	0.979173	no	no	no	no
YFR050C::chr00_2	YFR050C	PRE4	0.0284146	0.534732	0.440577	0.15304	no	no	no	no
YFR051C::chr00_2	YFR051C	RET2	0.566309	2.04288	0.104978	3.11012e-05	no	no	no	yes
YFR053C::chr00_2	YFR053C	HXK1	-0.189766	0.94977	0.617289	0.0326065	no	no	no	no
YFR054C::chr00_2	YFR054C	YFR054C	0.210165	-0.0787993	0.300626	0.57501	no	no	no	no
YGL001C::chr7_1	YGL001C	ERG26	0.669597	-0.554273	0.071363	0.870531	no	no	no	no
YGL004C::chr7_1	YGL004C	RPN14	-0.111763	-0.0946243	0.554977	0.587229	no	no	no	no
YGL005C::chr7_1	YGL005C	COG7	2.35956	-0.300774	4.01072e-07	0.734956	yes	no	yes	no
YGL006W::chr7_1	YGL006W	PMC1	-0.304408	0.308935	0.703227	0.281901	no	yes	no	yes
YGL007W::chr7_1	YGL007W	BRP1	-0.00679346	-0.387265	0.469219	0.787802	no	no	no	no
YGL009C::chr7_1	YGL009C	LEU1	0.762706	0.654314	0.0487751	0.103865	no	no	no	no
YGL022W::chr7_1	YGL022W	STT3	-0.154832	-0.11436	0.589655	0.602348	no	no	no	no
YGL023C::chr7_1	YGL023C	PIB2	0.473199	-0.149766	0.143992	0.629076	no	no	no	no
YGL026C::chr7_1	YGL026C	TRP5	-0.134483	0.435197	0.573341	0.204188	no	no	no	no
YGL032C::chr7_1	YGL032C	AGA2	0.058162	0.627842	0.416611	0.113617	no	no	no	no
YGL034C::chr7_1	YGL034C	YGL034C	-1.4528	-1.26746	0.998081	0.994434	no	no	no	no
YGL036W::chr7_1	YGL036W	YGL036W	0.123615	0.0710761	0.365072	0.457363	no	no	no	no
YGL037C::chr7_1	YGL037C	PNC1	-0.478972	-0.0185213	0.813816	0.527906	no	no	no	no
YGL038C::chr7_1	YGL038C	OCH1	0.543589	0.172162	0.113707	0.37947	no	no	no	no
YGL039W::chr7_1	YGL039W	YGL039W	0.271566	-0.0137043	0.258284	0.524116	no	no	no	no
YGL042C::chr7_1	YGL042C	YGL042C	1.04693	1.19488	0.0125355	0.00994934	no	no	no	no
YGL045W::chr7_1	YGL045W	RIM8	-0.185764	0.153303	0.614151	0.393734	no	no	no	no
YGL046W::chr7_1	YGL045W	RIM8	0.473199	0.867308	0.143992	0.0463999	no	no	no	no
YGL048C::chr7_1	YGL048C	RPT6	0.747374	0.364807	0.0520413	0.245842	no	no	no	no
YGL049C::chr7_1	YGL049C	TIF4632	0.058162	-0.535657	0.416611	0.862608	no	no	no	no
YGL050W::chr7_1	YGL050W	TYW3	0.588677	0.257892	0.0968685	0.316924	no	no	no	no
YGL054C::chr7_1	YGL054C	ERV14	-0.0122273	0.184235	0.473658	0.370422	no	no	no	no
YGL055W::chr7_1	YGL055W	OLE1	0.83577	1.11969	0.0353943	0.0146418	no	no	no	no
YGL056C::chr7_1	YGL056C	SDS23	-0.472353	0.212804	0.810153	0.349303	no	no	no	no
YGL057C::chr7_1	YGL057C	GEP7	0.0037142	0.67293	0.460648	0.0973797	no	no	no	no
YGL058W::chr7_1	YGL058W	RAD6	-0.00323856	-0.111631	0.466318	0.600266	no	no	no	no
YGL063W::chr7_1	YGL063W	PUS2	0.0186336	-0.128233	0.448509	0.612886	no	no	no	no
YGL064C::chr7_1	YGL064C	MRH4	0.0435152	-0.0204828	0.428378	0.529449	no	no	no	no
YGL067W::chr7_1	YGL067W	NPY1	-0.154832	0.239276	0.589655	0.330141	no	no	no	no
YGL071W::chr7_1	YGL071W	AFT1	-0.32035	-0.0502302	0.714449	0.552776	no	no	no	no
YGL072C::chr7_1	YGL072C	YGL072C	-0.696726	0.0428793	0.909722	0.479523	no	no	no	no
YGL076C::chr7_1	YGL076C	RPL7A	0.303274	-0.335632	0.237696	0.757026	no	no	no	no
YGL079W::chr7_1	YGL079W	KXD1	0.229274	0.705844	0.287117	0.0866491	no	no	no	no
YGL080W::chr7_1	YGL080W	FMP37	-0.0778157	-0.0162828	0.52733	0.526145	no	no	no	no
YGL081W::chr7_1	YGL081W	YGL081W	-0.430585	0.319004	0.786029	0.27522	no	no	no	no
YGL084C::chr7_1	YGL084C	GUP1	0.730997	0.445727	0.0557197	0.198339	no	no	no	no
YGL085W::chr7_1	YGL085W	LCL3	-0.769657	-0.372158	0.931725	0.779042	no	no	no	no
YGL086W::chr7_1	YGL086W	MAD1	-0.526801	-0.4128	0.838969	0.80214	no	no	no	no
YGL087C::chr7_1	YGL087C	MMS2	-0.153757	0.861233	0.588797	0.0475781	no	no	no	no
YGL088W::chr7_1	YGL088W	YGL088W	-0.263766	-0.437253	0.673744	0.815306	no	no	no	no
YGL091C::chr7_1	YGL091C	NBP35	0.143892	0.257892	0.349542	0.316924	no	no	no	no
YGL092W::chr7_1	YGL092W	NUP145	0.367846	0.123799	0.198696	0.416332	no	no	no	no
YGL095C::chr7_1	YGL095C	VPS45	0.612603	-0.506206	0.0887138	0.849409	no	no	no	no
YGL097W::chr7_1/chr00_17a	YGL097W	SRM1	0.374421	0.0867055	0.194954	0.445132	no	no	no	no
YGL098W::chr7_2	YGL098W	USE1	0.33118	-0.362174	0.220348	0.77314	no	no	no	no
YGL101W::chr7_2	YGL101W	YGL101W	0.639849	0.75385	0.0800627	0.0726184	no	no	no	no
YGL102C::chr7_2	YGL102C	YGL102C	0.43438	-0.540333	0.162837	0.864629	no	no	no	no
YGL107C::chr7_2	YGL107C	RMD9	-0.941838	-1.13769	0.967278	0.988756	no	no	no	no
YGL110C::chr7_2	YGL110C	CUE3	0.250807	-0.0897585	0.272247	0.58348	no	no	no	no
YGL112C::chr7_2	YGL112C	TAF6	-0.217116	0.180383	0.638523	0.373302	no	no	no	no
YGL122C::chr7_2	YGL122C	NAB2	0.173639	0.480285	0.327213	0.179868	no	no	no	no
YGL123W::chr7_2	YGL123W	RPS2	-1.27682	0.502311	0.994295	0.168678	no	no	no	no
YGL128C::chr7_2	YGL128C	CWC23	-0.252626	0.0652471	0.665459	0.461935	no	no	no	no
YGL131C::chr7_2	YGL131C	SNT2	0.151271	1.00224	0.34395	0.0257377	no	no	no	no
YGL132W::chr7_2	YGL132W	YGL132W	-0.152405	-0.149766	0.587717	0.629076	no	no	no	no
YGL133W::chr7_2	YGL133W	ITC1	0.067943	-0.28372	0.408793	0.723799	no	no	no	no
YGL135W::chr7_2	YGL135W	RPL1B	0.593494	0.616346	0.0951839	0.11805	no	no	no	no
YGL136C::chr7_2	YGL136C	MRM2	-1.27682	-0.760724	0.994295	0.937847	no	no	no	no
YGL138C::chr7_2	YGL138C	YGL138C	-1.04137	0.00223727	0.979648	0.511559	no	no	no	no
YGL139W::chr7_2	YGL139W	FLC3	0.165077	-0.886731	0.333581	0.96295	no	no	no	no
YGL141W::chr7_2	YGL141W	HUL5	0.925712	0.480285	0.023215	0.179868	no	no	no	no
YGL142C::chr7_2	YGL142C	GPI10	0.588677	0.895322	0.0968685	0.041266	no	no	no	no
YGL143C::chr7_2	YGL143C	MRF1	1.05816	0.490338	0.0118069	0.174703	no	no	no	no
YGL146C::chr7_2	YGL146C	RRT6	-0.281688	0.194882	0.686894	0.362502	no	no	no	no
YGL147C::chr7_2	YGL147C	RPL9A	0.77276	-0.722655	0.0467237	0.92809	no	no	no	no
YGL149W::chr7_2	YGL149W	YGL149W	0.0350784	0.0710761	0.435186	0.457363	no	no	no	no
YGL150C::chr7_2	YGL150C	INO80	1.08325	0.522349	0.0103103	0.158895	no	no	no	no
YGL151W::chr7_2	YGL151W	NUT1	-0.127193	-0.435884	0.567464	0.814583	no	no	no	no
YGL152C::chr7_2	YGL152C	YGL152C	0.543589	0.850234	0.113707	0.0497723	no	no	no	no
YGL153W::chr7_2	YGL153W	PEX14	-0.274034	-0.220155	0.681306	0.680297	no	no	no	no
YGL154C::chr7_2	YGL154C	LYS5	0.422573	0.364807	0.168873	0.245842	no	no	no	no
YGL155W::chr7_2	YGL155W	CDC43	0.0137679	-0.442548	0.452463	0.818083	no	no	no	no
YGL156W::chr7_2	YGL156W	AMS1	-0.223408	0.135326	0.643351	0.407466	no	no	no	no
YGL157W::chr7_2	YGL157W	ARI1	0.824672	0.404336	0.0372078	0.22191	no	no	no	no
YGL158W::chr7_2	YGL158W	RCK1	-0.386623	-0.272623	0.758808	0.716417	no	no	no	no
YGL159W::chr7_2	YGL159W	YGL159W	0.370106	-0.635193	0.197405	0.901273	no	no	no	no
YGL161C::chr7_2	YGL161C	YIP5	0.425894	0.686735	0.167161	0.0927658	no	no	no	no
YGL162W::chr7_2	YGL162W	SUT1	0.449741	0.595105	0.155197	0.126559	no	no	no	no
YGL163C::chr7_2	YGL163C	RAD54	0.151271	-0.679587	0.34395	0.91568	no	no	no	no
YGL164C::chr7_2	YGL164C	YRB30	0.580115	0.471723	0.0999165	0.18434	no	no	no	no
YGL165C::chr7_2	YGL165C	YGL165C	-0.403226	-0.297024	0.769304	0.732522	no	no	no	no
YGL166W::chr7_2	YGL166W	CUP2	0.376984	0.415433	0.193507	0.215438	no	no	no	no
YGL167C::chr7_2	YGL167C	PMR1	-0.102485	-0.442548	0.547442	0.818083	no	no	no	no
YGL168W::chr7_2	YGL168W	HUR1	-0.283529	-0.186603	0.688232	0.656237	no	no	no	no
YGL169W::chr7_2	YGL169W	SUA5	-0.329354	-0.0669089	0.720698	0.565781	no	no	no	no
YGL170C::chr7_2	YGL170C	SPO74	0.586856	-0.11436	0.0975107	0.602348	no	no	no	no
YGL171W::chr7_2	YGL171W	ROK1	0.183693	-0.98883	0.319799	0.976583	no	no	no	no
YGL172W::chr7_2	YGL172W	NUP49	0.127425	0.862307	0.362137	0.0473681	no	no	no	no
YGL173C::chr7_2	YGL173C	XRN1	-0.38095	-0.104678	0.755163	0.594948	no	no	no	no
YGL174W::chr7_2	YGL174W	BUD13	0.585674	0.686735	0.0979295	0.0927658	no	no	no	no
YGL175C::chr7_2	YGL175C	SAE2	1.05816	-0.465268	0.0118069	0.829702	no	no	no	no
YGL176C::chr7_2	YGL176C	YGL176C	0.404487	0.137397	0.178394	0.405878	no	no	no	no
YGL177W::chr7_2	YGL177W	YGL177W	-0.0769976	-0.149766	0.526662	0.629076	no	no	no	no
YGL179C::chr7_2	YGL179C	TOS3	-0.136854	-0.19462	0.575249	0.662049	no	no	no	no
YGL180W::chr7_2	YGL180W	ATG1	0.259075	-0.161261	0.266642	0.637629	no	no	no	no
YGL181W::chr7_2	YGL181W	GTS1	-0.820984	-0.635193	0.944546	0.901273	no	no	no	no
YGL194C::chr7_3	YGL194C	HOS2	-0.42862	0.364807	0.784852	0.245842	no	no	no	no
YGL195W::chr7_3	YGL195W	GCN1	-3.02838	-2.3067	1	0.999998	no	no	no	no
YGL197W::chr7_3	YGL197W	MDS3	1.01377	0.905376	0.0149194	0.0395399	no	no	no	no
YGL199C::chr7_3/chr00_12	YGL199C	YGL199C	-0.919118	-1.22016	0.963719	0.992757	no	no	no	no
YGL201C::chr7_3	YGL201C	MCM6	0.0371004	0.282345	0.433552	0.299914	no	no	no	no
YGL202W::chr7_3	YGL202W	ARO8	-0.799819	-0.220155	0.93951	0.680297	no	no	no	no
YGL205W::chr7_3	YGL205W	POX1	-0.487813	-0.721736	0.81864	0.92784	no	no	no	no
YGL206C::chr7_3	YGL206C	CHC1	0.210165	0.101773	0.300626	0.433389	no	no	no	no
YGL207W::chr7_3	YGL207W	SPT16	0.5472	0.51681	0.112286	0.161561	no	no	no	no
YGL208W::chr7_3	YGL208W	SIP2	-0.526801	0.212804	0.838969	0.349303	no	no	no	no
YGL209W::chr7_3	YGL209W	MIG2	0.888237	-0.335632	0.0277759	0.757026	no	no	no	no
YGL210W::chr7_3	YGL210W	YPT32	-0.297319	-1.35508	0.698173	0.996653	no	no	no	no
YGL211W::chr7_3	YGL211W	NCS6	-0.237294	-0.175761	0.653923	0.648319	no	no	no	no
YGL213C::chr7_3	YGL213C	SKI8	-0.111763	-0.372158	0.554977	0.779042	no	no	no	no
YGL214W::chr7_3/chr00_12	YGL214W	YGL214W	-0.614263	0.364807	0.878953	0.245842	no	no	no	no
YGL215W::chr7_3	YGL215W	CLG1	0.540314	0.654314	0.115007	0.103865	no	no	no	no
YGL216W::chr7_3	YGL216W	KIP3	-0.0793415	0.686735	0.528577	0.0927658	no	no	no	no
YGL217C::chr7_3/chr00_12	YGL217C	YGL217C	-1.11176	-0.120619	0.985775	0.607113	no	no	no	no
YGL218W::chr7_3/chr00_12	YGL218W	YGL218W	-1.13561	-0.772696	0.987454	0.940692	no	no	no	no
YGL219C::chr00_14	YGL219C	MDM34	-0.9629	-0.869658	0.970315	0.960135	no	no	no	no
YGL220W::chr7_3	YGL220W	FRA2	-0.189766	0.364807	0.617289	0.245842	no	no	no	no
YGL221C::chr7_3	YGL221C	NIF3	-0.0673689	0.824239	0.518789	0.0552794	no	no	no	no
YGL222C::chr7_3	YGL222C	EDC1	-0.826361	-1.32707	0.945771	0.99605	no	no	no	no
YGL223C::chr7_3	YGL223C	COG1	0.292627	-0.0502302	0.244507	0.552776	no	no	no	no
YGL224C::chr7_3	YGL224C	SDT1	0.406085	-0.635193	0.177539	0.901273	no	no	no	no
YGL226C-A::chr7_3	YGL226C-A	OST5	-1.02838	-0.721736	0.978301	0.92784	no	no	no	no
YGL227W::chr7_3	YGL227W	VID30	-0.799819	-1.05023	0.93951	0.982534	no	no	no	no
YGL230C::chr7_3	YGL230C	YGL230C	-1.11176	-0.866518	0.985775	0.959599	no	no	no	no
YGL231C::chr7_3	YGL231C	EMC4	-0.880437	-0.272623	0.956934	0.716417	no	no	no	no
YGL233W::chr7_3	YGL233W	SEC15	-1.74919	-1.05023	0.999767	0.982534	no	no	no	no
YGL234W::chr7_3	YGL234W	ADE5,7	-0.285792	-0.519715	0.689873	0.855565	no	no	no	no
YGL235W::chr7_3/chr00_12	YGL235W	YGL235W	-1.17066	-1.44255	0.989609	0.99804	no	no	no	no
YGL236C::chr7_3	YGL236C	MTO1	0.058162	-0.165707	0.416611	0.640919	no	no	no	no
YGL237C::chr7_3	YGL237C	HAP2	0.312735	0.130342	0.231732	0.411294	no	no	no	no
YGL238W::chr7_3	YGL238W	CSE1	-0.642278	0.086543	0.890141	0.445259	no	yes	no	yes
YGL239C::chr7_3/chr00_12	YGL239C	YGL239C	0.125276	-0.497689	0.363791	0.84544	no	no	no	no
YGL240W::chr7_3	YGL240W	DOC1	-0.614263	0.0428793	0.878953	0.479523	no	no	no	no
YGL241W::chr7_3	YGL241W	KAP114	-0.148289	0.257892	0.584425	0.316924	no	no	no	no
YGL242C::chr7_3	YGL242C	YGL242C	-0.633716	-0.841644	0.886803	0.955141	no	no	no	no
YGL246C::chr7_3	YGL246C	RAI1	-0.835736	-0.721736	0.947855	0.92784	no	no	no	no
YGL247W::chr7_3	YGL247W	BRR6	0.195666	0.708762	0.311064	0.0857424	no	no	no	no
YGL248W::chr7_3	YGL248W	PDE1	0.851711	-0.742108	0.0329167	0.933213	no	no	no	no
YGL249W::chr7_3	YGL249W	ZIP2	-0.728821	-1.72174	0.919979	0.999705	no	no	no	no
YGL251C::chr7_3	YGL251C	HFM1	0.473199	0.502311	0.143992	0.168678	no	no	no	no
YGL253W::chr7_3	YGL253W	HXK2	0.913772	1.02777	0.0245943	0.0228603	no	no	no	no
YGL254W::chr7_3	YGL254W	FZF1	-0.14151	-0.158755	0.578991	0.63577	no	no	no	no
YGL256W::chr7_3	YGL256W	ADH4	0.0206873	-0.0877049	0.446842	0.581896	no	no	no	no
YGL257C::chr7_3	YGL257C	MNT2	0.210165	-0.0502302	0.300626	0.552776	no	no	no	no
YGL259W::chr7_3	YGL259W	YPS5	0.0186336	-0.272623	0.448509	0.716417	no	no	no	no
YGL260W::chr7_3	YGL260W	YGL260W	0.058162	0.627842	0.416611	0.113617	no	no	no	no
YGL261C::chr7_3	YGL261C	PAU11	0.473199	0.824239	0.143992	0.0552794	no	no	no	no
YGR002C::chr7_3	YGR002C	SWC4	0.473199	0.130342	0.143992	0.411294	no	no	no	no
YGR003W::chr7_3	YGR003W	CUL3	-0.0673689	-0.345686	0.518789	0.763202	no	no	no	no
YGR004W::chr7_3	YGR004W	PEX31	0.335696	-0.898227	0.21761	0.964753	no	no	no	no
YGR006W::chr7_3	YGR006W	PRP18	0.83577	1.2128	0.0353943	0.00904734	no	no	no	no
YGR008C::chr7_3	YGR008C	STF2	-0.276822	0.016884	0.683347	0.500012	no	no	no	no
YGR011W::chr7_3/chr00_12	YGR011W	YGR011W	-1.15129	-0.635193	0.988462	0.901273	no	no	no	no
YGR012W::chr7_3	YGR012W	YGR012W	0.263746	0.11688	0.2635	0.421675	no	no	no	no
YGR014W::chr7_3	YGR014W	MSB2	-0.315296	0.016884	0.710914	0.500012	no	no	no	no
YGR015C::chr7_3	YGR015C	YGR015C	0.216042	0.330042	0.296441	0.267985	no	no	no	no
YGR016W::chr7_3	YGR016W	YGR016W	-0.526801	-0.0502302	0.838969	0.552776	no	no	no	no
YGR018C::chr7_3/chr00_12	YGR018C	YGR018C	0.40281	0.364807	0.179294	0.245842	no	no	no	no
YGR020C::chr7_3	YGR020C	VMA7	0.330242	-0.137693	0.220919	0.620025	no	no	no	no
YGR021W::chr7_3	YGR021W	YGR021W	0.0946879	-0.120619	0.387611	0.607113	no	no	no	no
YGR024C::chr00_14	YGR024C	THG1	-0.705138	-0.19462	0.912501	0.662049	no	no	no	no
YGR025W::chr7_3/chr00_12	YGR025W	YGR025W	-0.0390067	0.12562	0.495569	0.414929	no	no	no	no
YGR026W::chr7_3	YGR026W	YGR026W	-1.11176	-0.635193	0.985775	0.901273	no	no	no	no
YGR027C::chr7_4	YGR027C	RPS25A	0.431379	0.45227	0.164357	0.194757	no	no	no	no
YGR028W::chr00_14	YGR028W	MSP1	0.179468	0.997076	0.322906	0.0263548	no	no	no	no
YGR030C::chr7_4	YGR030C	POP6	0.795128	-0.0502302	0.0424079	0.552776	no	no	no	no
YGR031W::chr7_4	YGR031W	IMO32	-0.397517	0.49409	0.765725	0.1728	no	no	no	no
YGR032W::chr00_14	YGR032W	GSC2	-0.477891	-1.12062	0.813221	0.987721	no	no	no	no
YGR033C::chr7_4	YGR033C	TIM21	0.728457	-0.233094	0.0563083	0.689384	no	no	no	no
YGR034W::chr7_4	YGR034W	RPL26B	0.110629	0.172162	0.375138	0.37947	no	no	no	no
YGR035C::chr7_4	YGR035C	YGR035C	0.058162	0.161274	0.416611	0.387687	no	no	no	no
YGR036C::chr7_4	YGR036C	CAX4	-0.204872	-0.313265	0.629066	0.74298	no	no	no	no
YGR038W::chr00_14	YGR038W	ORM1	-0.382411	-0.635193	0.756105	0.901273	no	no	no	no
YGR039W::chr7_4	YGR039W	YGR039W	0.473199	-0.0502302	0.143992	0.552776	no	no	no	no
YGR040W::chr00_14	YGR040W	KSS1	0.363575	-0.709193	0.201151	0.924371	no	no	no	no
YGR042W::chr7_4	YGR042W	YGR042W	-0.132522	-0.111631	0.571761	0.600266	no	no	no	no
YGR043C::chr7_4	YGR043C	NQM1	0.404487	1.26293	0.178394	0.00689394	no	no	no	no
YGR045C::chr7_4	YGR045C	YGR045C	0.098804	-0.272623	0.384379	0.716417	no	no	no	no
YGR046W::chr00_14	YGR046W	TAM41	0.625203	0.51681	0.0846304	0.161561	no	no	no	no
YGR047C::chr7_4	YGR047C	TFC4	0.473199	0.80538	0.143992	0.0595678	no	no	no	no
YGR049W::chr7_4	YGR049W	SCM4	0.53733	-0.281556	0.1162	0.722367	no	no	no	no
YGR050C::chr00_14	YGR050C	YGR050C	0.714208	2.20202	0.0597007	7.84279e-06	no	yes	no	yes
YGR051C::chr7_4	YGR051C	YGR051C	-0.213301	-0.722655	0.635585	0.92809	no	no	no	no
YGR052W::chr7_4	YGR052W	FMP48	-0.0621322	-0.480865	0.514505	0.837397	no	no	no	no
YGR053C::chr00_14	YGR053C	YGR053C	0.0923777	0.194882	0.389428	0.362502	no	no	no	no
YGR055W::chr7_4	YGR055W	MUP1	-0.0722347	0.404336	0.522769	0.22191	no	no	no	no
YGR056W::chr7_4	YGR056W	RSC1	-0.728821	-0.136773	0.919979	0.619333	no	no	no	no
YGR058W::chr7_4	YGR058W	PEF1	0.30814	0.0872734	0.234618	0.444688	no	no	no	no
YGR060W::chr7_4	YGR060W	ERG25	-0.204872	0.464343	0.629066	0.188251	no	no	no	no
YGR061C::chr7_4	YGR061C	ADE6	0.00753591	0.757125	0.457534	0.0717287	no	no	no	no
YGR064W::chr7_4	YGR064W	YGR064W	-0.252626	1.06525	0.665459	0.0191312	no	no	no	no
YGR065C::chr7_4	YGR065C	VHT1	-0.368103	-0.220155	0.746801	0.680297	no	no	no	no
YGR066C::chr7_4	YGR066C	YGR066C	0.541912	-0.909368	0.114371	0.96643	no	no	no	no
YGR067C::chr7_4	YGR067C	YGR067C	0.286786	0.467901	0.248288	0.186359	no	no	no	no
YGR069W::chr7_4	YGR069W	YGR069W	0.504908	0.428938	0.129735	0.207713	no	no	no	no
YGR071C::chr7_4	YGR071C	ENV11	0.097051	0.749471	0.385754	0.0738212	no	no	no	no
YGR073C::chr7_4	YGR073C	YGR073C	0.098804	-0.202233	0.384379	0.667532	no	no	no	no
YGR074W::chr7_4	YGR074W	SMD1	-0.330658	0.662488	0.721597	0.10098	no	no	no	no
YGR075C::chr7_4	YGR075C	PRP38	0.368863	0.294418	0.198115	0.291671	no	no	no	no
YGR078C::chr7_4	YGR078C	PAC10	0.530915	-0.0502302	0.118795	0.552776	no	no	no	no
YGR079W::chr7_4	YGR079W	YGR079W	0.199025	0.703609	0.308632	0.0873485	no	no	no	no
YGR080W::chr7_4	YGR080W	TWF1	0.431977	0.225404	0.164054	0.340131	no	no	no	no
YGR082W::chr00_14	YGR082W	TOM20	-0.728821	-0.458701	0.919979	0.826394	no	no	no	no
YGR083C::chr7_4	YGR083C	GCD2	0.584231	0.419255	0.0984426	0.213235	no	no	no	no
YGR084C::chr7_4	YGR084C	MRP13	-0.248084	0.181943	0.662058	0.372134	no	no	no	no
YGR086C::chr00_14	YGR086C	PIL1	-0.646099	0.637826	0.891608	0.109865	no	no	no	no
YGR087C::chr7_4	YGR087C	PDC6	-0.152986	0.640442	0.588181	0.108897	no	no	no	no
YGR089W::chr00_14	YGR089W	NNF2	0.280554	-0.528277	0.252356	0.859377	no	no	no	no
YGR090W::chr7_4	YGR090W	UTP22	0.473199	0.5872	0.143992	0.129832	no	no	no	no
YGR092W::chr00_14	YGR092W	DBF2	0.238734	-0.54773	0.280537	0.867783	no	no	no	no
YGR095C::chr7_4	YGR095C	RRP46	0.823509	-0.898227	0.0374022	0.964753	yes	no	yes	no
YGR097W::chr7_4	YGR097W	ASK10	-0.204872	-0.372158	0.629066	0.779042	no	no	no	no
YGR098C::chr7_4	YGR098C	ESP1	0.189407	-0.433559	0.315618	0.813352	no	no	no	no
YGR099W::chr7_4	YGR099W	TEL2	-0.334155	-0.220155	0.724002	0.680297	no	no	no	no
YGR100W::chr7_4	YGR100W	MDR1	0.53733	0.888369	0.1162	0.0424951	no	no	no	no
YGR101W::chr7_4	YGR101W	PCP1	-0.479495	0.0710761	0.814104	0.457363	no	no	no	no
YGR102C::chr7_4	YGR102C	GTF1	-0.270962	0.294418	0.679051	0.291671	no	no	no	no
YGR104C::chr7_4	YGR104C	SRB5	-0.0171261	0.0566851	0.477662	0.468661	no	no	no	no
YGR107W::chr7_4	YGR107W	YGR107W	-0.0793415	0.85666	0.528577	0.0484807	no	no	no	no
YGR111W::chr7_4	YGR111W	YGR111W	0.166538	0.483452	0.332491	0.17823	no	no	no	no
YGR114C::chr7_4	YGR114C	YGR114C	-0.16423	0.534732	0.59714	0.15304	no	no	no	no
YGR115C::chr7_4	YGR115C	YGR115C	-0.346228	0.130342	0.732224	0.411294	no	no	no	no
YGR116W::chr00_14	YGR116W	SPT6	-0.178877	0.297693	0.608733	0.289453	no	no	no	no
YGR117C::chr00_14	YGR117C	YGR117C	-0.504774	-0.345686	0.827674	0.763202	no	no	no	no
YGR119C::chr7_4	YGR119C	NUP57	-0.806908	0.308935	0.941235	0.281901	no	yes	no	yes
YGR120C::chr7_4	YGR120C	COG2	-0.0243002	0.282345	0.48353	0.299914	no	no	no	no
YGR122C-A::chr00_17a	YGR122C-A	YGR122C-A	0.0326269	0.364807	0.437168	0.245842	no	no	no	no
YGR122W::chr7_4	YGR122W	YGR122W	-0.880437	-0.635193	0.956934	0.901273	no	no	no	no
YGR123C::chr7_5	YGR123C	PPT1	-0.0862279	-0.387265	0.534199	0.787802	no	no	no	no
YGR124W::chr7_5	YGR124W	ASN2	0.321196	0.101773	0.226469	0.433389	no	no	no	no
YGR127W::chr7_5	YGR127W	YGR127W	0.390737	-0.24817	0.185854	0.699826	no	no	no	no
YGR131W::chr7_5	YGR131W	FHN1	0.0946879	-0.120619	0.387611	0.607113	no	no	no	no
YGR133W::chr7_5	YGR133W	PEX4	-0.154832	1.23928	0.589655	0.0078461	no	no	no	no
YGR135W::chr7_5	YGR135W	PRE9	0.826836	0.303407	0.0368482	0.285603	no	no	no	no
YGR139W::chr7_5	YGR139W	YGR139W	0.0841572	0.669662	0.395915	0.098496	no	no	no	no
YGR140W::chr7_5	YGR140W	CBF2	0.584231	0.0753007	0.0984426	0.454052	no	no	no	no
YGR141W::chr7_5	YGR141W	VPS62	0.303274	0.0428793	0.237696	0.479523	no	no	no	no
YGR143W::chr7_5	YGR143W	SKN1	0.425894	-0.120619	0.167161	0.607113	no	no	no	no
YGR144W::chr7_5	YGR144W	THI4	-0.304408	-0.287269	0.703227	0.72614	no	no	no	no
YGR146C::chr7_5	YGR146C	ECL1	-0.526801	-0.702307	0.838969	0.922413	no	no	no	no
YGR147C::chr7_5	YGR147C	NAT2	-0.312676	0.135326	0.709073	0.407466	no	no	no	no
YGR151C::chr7_5	YGR151C	YGR151C	-0.159069	0.163173	0.593034	0.386249	no	no	no	no
YGR158C::chr7_5	YGR158C	MTR3	1.29632	0.888369	0.00295941	0.0424951	no	no	no	no
YGR159C::chr7_5	YGR159C	NSR1	-0.263766	0.271698	0.673744	0.30727	no	no	no	no
YGR163W::chr7_5	YGR163W	GTR2	0.292627	0.271698	0.244507	0.30727	no	no	no	no
YGR165W::chr7_5	YGR165W	MRPS35	-0.574106	-0.635193	0.861556	0.901273	no	no	no	no
YGR171C::chr7_5	YGR171C	MSM1	0.38009	-0.0502302	0.191762	0.552776	no	no	no	no
YGR174C::chr7_5	YGR174C	CBP4	-0.562424	-0.561192	0.85619	0.873394	no	no	no	no
YGR176W::chr7_5	YGR176W	YGR176W	-0.16423	-0.272623	0.59714	0.716417	no	no	no	no
YGR177C::chr7_5	YGR177C	ATF2	0.110629	-0.3514	0.375138	0.766672	no	no	no	no
YGR178C::chr7_5	YGR178C	PBP1	-1.29234	-1.81576	0.994792	0.999854	no	no	no	no
YGR179C::chr7_5	YGR179C	OKP1	0.0478936	-0.363891	0.424853	0.774161	no	no	no	no
YGR180C::chr7_5	YGR180C	RNR4	-0.0971162	0.239276	0.543074	0.330141	no	no	no	no
YGR181W::chr7_5	YGR181W	TIM13	1.36628	0.111051	0.00189059	0.426188	no	no	no	no
YGR183C::chr7_5	YGR183C	QCR9	0.493377	0.405449	0.134802	0.221256	no	no	no	no
YGR184C::chr7_5	YGR184C	UBR1	0.566309	0.277345	0.104978	0.303359	no	no	no	no
YGR186W::chr7_5	YGR186W	TFG1	0.5472	0.413717	0.112286	0.216432	no	no	no	no
YGR187C::chr7_5	YGR187C	HGH1	0.385737	0.364807	0.188615	0.245842	no	no	no	no
YGR188C::chr00_10	YGR188C	BUB1	0.422573	0.0846994	0.168873	0.446699	no	no	no	no
YGR189C::chr7_5	YGR189C	CRH1	0.558929	-0.18268	0.107758	0.65338	no	no	no	no
YGR192C::chr7_5	YGR192C	TDH3	-0.424921	-0.129957	0.782626	0.61419	no	no	no	no
YGR193C::chr7_5	YGR193C	PDX1	-0.40127	-1.05023	0.768081	0.982534	no	no	no	no
YGR196C::chr7_5	YGR196C	FYV8	-0.246693	-0.0712918	0.661013	0.569188	no	no	no	no
YGR197C::chr7_5	YGR197C	SNG1	0.218627	-0.0502302	0.294608	0.552776	no	no	no	no
YGR200C::chr7_5	YGR200C	ELP2	0.199025	-0.0162828	0.308632	0.526145	no	no	no	no
YGR204W::chr00_10	YGR204W	ADE3	0.540314	0.239276	0.115007	0.330141	no	no	no	no
YGR205W::chr7_5	YGR205W	TDA10	1.00925	0.415433	0.0152724	0.215438	no	no	no	no
YGR207C::chr7_5	YGR207C	CIR1	0.030256	0.00725534	0.439086	0.507603	no	no	no	no
YGR209C::chr7_5	YGR209C	TRX2	0.958626	0.364807	0.0197457	0.245842	no	no	no	no
YGR210C::chr00_8	YGR210C	YGR210C	-0.111763	1.00224	0.554977	0.0257377	no	no	no	no
YGR212W::chr7_5	YGR212W	SLI1	-0.156851	0.172162	0.591266	0.37947	no	no	no	no
YGR215W::chr7_5	YGR215W	RSM27	-0.551463	-0.477651	0.851029	0.835831	no	no	no	no
YGR216C::chr7_5	YGR216C	GPI1	0.673897	0.931154	0.0701679	0.035381	no	no	no	no
YGR219W::chr00_2	YGR219W	YGR219W	0.610703	-0.635193	0.0893419	0.901273	no	no	no	no
YGR221C::chr00_2	YGR221C	TOS2	0.161255	0.315898	0.336439	0.277272	no	no	no	no
YGR222W::chr00_2	YGR222W	PET54	0.354555	-0.149766	0.206393	0.629076	no	no	no	no
YGR224W::chr00_2	YGR224W	AZR1	-0.423707	0.415433	0.781892	0.215438	no	no	no	no
YGR225W::chr00_2	YGR225W	AMA1	0.241874	1.08101	0.278369	0.0177243	no	no	no	no
YGR226C::chr00_2	YGR226C	YGR226C	0.580115	0.172162	0.0999165	0.37947	no	no	no	no
YGR227W::chr00_2	YGR227W	DIE2	-0.0628534	0.364807	0.515095	0.245842	no	no	no	no
YGR228W::chr00_2	YGR228W	YGR228W	-0.178877	-0.197072	0.608733	0.663818	no	no	no	no
YGR229C::chr00_2	YGR229C	SMI1	0.199025	0.26751	0.308632	0.310185	no	no	no	no
YGR232W::chr00_2	YGR232W	NAS6	1.01377	0.779845	0.0149194	0.0657846	no	no	no	no
YGR234W::chr00_2	YGR234W	YHB1	0.177744	0.736776	0.324178	0.0773944	no	no	no	no
YGR235C::chr00_2	YGR235C	MOS2	-0.292335	0.823509	0.694597	0.0554409	no	yes	no	yes
YGR236C::chr00_2	YGR236C	SPG1	1.79513	-0.957121	7.96244e-05	0.972893	no	no	yes	no
YGR238C::chr00_14	YGR238C	KEL2	-0.325167	-0.111631	0.7178	0.600266	no	no	no	no
YGR240C::chr00_2	YGR240C	PFK1	-0.0122273	0.101773	0.473658	0.433389	no	no	no	no
YGR241C::chr00_2	YGR241C	YAP1802	0.133713	-0.378035	0.357309	0.782474	no	no	no	no
YGR242W::chr00_2	YGR242W	YGR242W	-0.0950843	0.0935053	0.541419	0.439826	no	no	no	no
YGR243W::chr00_2	YGR243W	FMP43	-0.289761	0.94977	0.692742	0.0326065	no	no	no	no
YGR245C::chr00_2	YGR245C	SDA1	0.569415	0.149079	0.103823	0.39695	no	no	no	no
YGR246C::chr00_2	YGR246C	BRF1	-0.986232	-0.805118	0.973403	0.947886	no	no	no	no
YGR247W::chr00_2	YGR247W	CPD1	0.250807	-0.272623	0.272247	0.716417	no	no	no	no
YGR248W::chr00_14	YGR248W	SOL4	-0.162036	-0.402532	0.595396	0.796446	no	no	no	no
YGR249W::chr00_2	YGR249W	MGA1	0.513841	0.534732	0.125901	0.15304	no	no	no	no
YGR250C::chr00_14	YGR250C	YGR250C	-0.111763	-0.335632	0.554977	0.757026	no	no	no	no
YGR251W::chr00_2	YGR251W	NOP19	0.507965	-0.4128	0.128414	0.80214	no	no	no	no
YGR252W::chr00_17a	YGR252W	GCN5	0.584231	0.534732	0.0984426	0.15304	no	no	no	no
YGR253C::chr00_3	YGR253C	PUP2	-0.749193	-0.0502302	0.926017	0.552776	no	no	no	no
YGR254W::chr00_17a	YGR254W	ENO1	-0.301734	1.04931	0.701325	0.0206491	no	no	no	no
YGR255C::chr00_17a	YGR255C	COQ6	0.431379	1.13034	0.164357	0.013879	no	no	no	no
YGR256W::chr00_3	YGR256W	GND2	-0.767809	-0.760724	0.931224	0.937847	no	no	no	no
YGR258C::chr00_17a	YGR258C	RAD2	0.606466	0.644915	0.0907549	0.107255	no	no	no	no
YGR259C::chr00_3	YGR259C	YGR259C	-0.0862279	-0.81353	0.534199	0.949634	no	no	no	no
YGR260W::chr00_3	YGR260W	TNA1	-0.071121	0.94977	0.521858	0.0326065	no	no	no	no
YGR263C::chr00_3	YGR263C	SAY1	0.473199	0.190778	0.143992	0.365548	no	no	no	no
YGR266W::chr00_3	YGR266W	YGR266W	0.00925238	-0.236643	0.456137	0.691856	no	no	no	no
YGR267C::chr00_3	YGR267C	FOL2	-0.263766	0.627842	0.673744	0.113617	no	no	no	no
YGR269W::chr00_3	YGR269W	YGR269W	1.38243	0.383666	0.00170019	0.234255	no	no	no	no
YGR271W::chr00_17a	YGR271W	SLH1	-0.526801	-0.383654	0.838969	0.785727	no	no	no	no
YGR273C::chr00_17a	YGR273C	YGR273C	-0.134483	-0.242875	0.573341	0.696177	no	no	no	no
YGR276C::chr00_17a	YGR276C	RNH70	-1.11176	-1.22016	0.985775	0.992757	no	no	no	no
YGR277C::chr00_3	YGR277C	CAB4	-0.178877	1.30894	0.608733	0.00532963	no	yes	no	yes
YGR279C::chr00_3	YGR279C	SCW4	-0.590931	0.016884	0.869042	0.500012	no	no	no	no
YGR280C::chr00_3	YGR280C	PXR1	0.151271	0.808414	0.34395	0.0588608	no	no	no	no
YGR281W::chr00_3	YGR281W	YOR1	0.0772708	-0.19462	0.401372	0.662049	no	no	no	no
YGR282C::chr00_3	YGR282C	BGL2	0.422573	0.5872	0.168873	0.129832	no	no	no	no
YGR283C::chr00_3	YGR283C	YGR283C	-0.492035	0.757125	0.820916	0.0717287	no	no	no	no
YGR285C::chr00_3	YGR285C	ZUO1	-0.0742883	1.20202	0.524448	0.0095811	no	yes	no	yes
YGR286C::chr00_3	YGR286C	BIO2	-0.48498	0.324165	0.817103	0.271825	no	no	no	no
YGR287C::chr00_3	YGR287C	IMA1	-0.0628534	0.51681	0.515095	0.161561	no	no	no	no
YGR288W::chr00_3	YGR288W	MAL13	-1.03581	-0.635193	0.979081	0.901273	no	no	no	no
YGR291C::chr00_17a	YGR291C	YGR291C	-0.59719	0.364807	0.871754	0.245842	no	no	no	no
YGR295C::chr00_17b	YGR295C	COS6	0.125276	-0.0826516	0.363791	0.577992	no	no	no	no
YHL002W::chr00_10	YHL002W	HSE1	-0.835736	-0.944128	0.947855	0.971247	no	no	no	no
YHL003C::chr8_1	YHL003C	LAG1	0.227443	0.0678256	0.288399	0.459912	no	no	no	no
YHL007C::chr8_1	YHL007C	STE20	-0.275262	-0.313265	0.682205	0.74298	no	no	no	no
YHL009C::chr8_1	YHL009C	YAP3	0.168345	0.0599528	0.331145	0.466093	no	no	no	no
YHL010C::chr8_1	YHL010C	ETP1	0.427396	0.319004	0.16639	0.27522	no	no	no	no
YHL012W::chr8_1	YHL012W	YHL012W	-0.370681	-0.34979	0.748491	0.765698	no	no	no	no
YHL013C::chr8_1	YHL013C	OTU2	0.0277883	-0.168067	0.441084	0.64266	no	no	no	no
YHL017W::chr8_1	YHL017W	YHL017W	-0.0596745	0.112041	0.512493	0.42542	no	no	no	no
YHL020C::chr8_1	YHL020C	OPI1	0.151271	-0.772696	0.34395	0.940692	no	no	no	no
YHL021C::chr8_1	YHL021C	AIM17	-0.703678	0.0810144	0.912023	0.44958	no	no	no	no
YHL022C::chr8_1	YHL022C	SPO11	-0.889371	-0.149766	0.958586	0.629076	no	no	no	no
YHL023C::chr8_1	YHL023C	NPR3	0.888237	0.627842	0.0277759	0.113617	no	no	no	no
YHL024W::chr00_8	YHL024W	RIM4	-0.0413737	-0.287269	0.497508	0.72614	no	no	no	no
YHL030W::chr8_1	YHL030W	ECM29	-0.246693	-0.501926	0.661013	0.847423	no	no	no	no
YHL032C::chr8_1	YHL032C	GUT1	-0.243008	-0.635193	0.65824	0.901273	no	no	no	no
YHL033C::chr8_1	YHL033C	RPL8A	-0.504774	-0.44878	0.827674	0.821318	no	no	no	no
YHL034C::chr8_1	YHL034C	SBP1	0.0137679	-0.635193	0.452463	0.901273	no	no	no	no
YHL036W::chr8_1	YHL036W	MUP3	-0.111763	0.824239	0.554977	0.0552794	no	no	no	no
YHL038C::chr8_1	YHL038C	CBP2	-0.441071	-0.32707	0.792247	0.751699	no	no	no	no
YHL041W::chr8_1	YHL041W	YHL041W	-0.647095	0.303407	0.891987	0.285603	no	no	no	no
YHL043W::chr8_1	YHL043W	ECM34	0.0137679	-0.220155	0.452463	0.680297	no	no	no	no
YHL044W::chr8_1	YHL044W	YHL044W	-0.111763	0.142415	0.554977	0.402037	no	no	no	no
YHL045W::chr8_1	YHL045W	YHL045W	0.5346	0.24933	0.117299	0.322976	no	no	no	no
YHL046C::chr8_1	YHL046C	PAU13	-0.361741	-0.513202	0.742605	0.852619	no	no	no	no
YHL047C::chr8_1	YHL047C	ARN2	-0.0503625	0.00725534	0.504869	0.507603	no	no	no	no
YHR003C::chr00_10	YHR003C	YHR003C	0.473199	0.265272	0.143992	0.311748	no	no	no	no
YHR004C::chr00_10	YHR004C	NEM1	-0.151952	-0.0744777	0.587355	0.57166	no	no	no	no
YHR005C::chr00_10	YHR005C	GPA1	0.181433	0.90086	0.32146	0.0403077	no	no	no	no
YHR006W::chr00_10	YHR006W	STP2	0.548162	1.08363	0.11191	0.0175001	no	no	no	no
YHR007C::chr00_10	YHR007C	ERG11	1.77576	0.404336	9.33249e-05	0.22191	no	no	yes	no
YHR008C::chr00_10	YHR008C	SOD2	0.588677	-0.635193	0.0968685	0.901273	no	no	no	no
YHR009C::chr00_10	YHR009C	TDA3	-0.143472	0.464343	0.580565	0.188251	no	no	no	no
YHR010W::chr8_1	YHR010W	RPL27A	-0.315296	0.961012	0.710914	0.0310197	no	yes	no	yes
YHR011W::chr8_1	YHR011W	DIA4	-1.02838	-0.136773	0.978301	0.619333	no	no	no	no
YHR012W::chr8_1	YHR012W	VPS29	-0.614263	-0.220155	0.878953	0.680297	no	no	no	no
YHR013C::chr8_1	YHR013C	ARD1	0.59873	0.627842	0.0933772	0.113617	no	no	no	no
YHR014W::chr8_1	YHR014W	SPO13	-0.143472	0.271698	0.580565	0.30727	no	no	no	no
YHR016C::chr00_8	YHR016C	YSC84	-0.111763	-0.272623	0.554977	0.716417	no	no	no	no
YHR018C::chr8_1	YHR018C	ARG4	-0.0793415	0.0622446	0.528577	0.464293	no	no	no	no
YHR021C::chr8_1	YHR021C	RPS27B	-0.196652	0.824239	0.622672	0.0552794	no	no	no	no
YHR023W::chr00_10	YHR023W	MYO1	0.33118	-0.421068	0.220348	0.806653	no	no	no	no
YHR024C::chr8_1	YHR024C	MAS2	0.9757	0.130342	0.0181265	0.411294	no	no	no	no
YHR025W::chr00_10	YHR025W	THR1	-1.33416	-0.372158	0.995946	0.779042	no	no	no	no
YHR026W::chr00_10	YHR026W	VMA16	-0.642278	-0.0502302	0.890141	0.552776	no	no	no	no
YHR028C::chr8_1	YHR028C	DAP2	-0.626336	-0.635193	0.883869	0.901273	no	no	no	no
YHR029C::chr8_1	YHR029C	YHI9	-0.0293009	-0.220155	0.487623	0.680297	no	no	no	no
YHR030C::chr8_1	YHR030C	SLT2	-0.935272	-0.944128	0.96628	0.971247	no	no	no	no
YHR031C::chr8_1	YHR031C	RRM3	1.15909	0.66737	0.00674547	0.0992845	no	no	no	no
YHR032W::chr00_8	YHR032W	ERC1	0.183693	-0.128233	0.319799	0.612886	no	no	no	no
YHR033W::chr8_1	YHR033W	YHR033W	0.633664	0.290807	0.0819683	0.294126	no	no	no	no
YHR034C::chr8_1	YHR034C	PIH1	-0.526801	-0.910827	0.838969	0.966645	no	no	no	no
YHR035W::chr8_1	YHR035W	YHR035W	-0.758126	-0.696593	0.928552	0.920759	no	no	no	no
YHR036W::chr8_1	YHR036W	BRL1	-0.393534	-1.00716	0.763209	0.978516	no	no	no	no
YHR037W::chr8_1	YHR037W	PUT2	0.357722	-0.442548	0.204543	0.818083	no	no	no	no
YHR038W::chr8_1	YHR038W	RRF1	-0.941838	0.671505	0.967278	0.0978651	no	yes	no	yes
YHR039C-B::chr00_3	YHR039C-A	VMA10	0.906159	1.11969	0.0255092	0.0146418	no	no	no	no
YHR039C::chr8_1	YHR039C	MSC7	-1.07112	-0.0502302	0.982467	0.552776	no	no	no	no
YHR041C::chr00_10	YHR041C	SRB2	0.250807	-0.0502302	0.272247	0.552776	no	no	no	no
YHR042W::chr8_1	YHR042W	NCP1	0.151271	1.36481	0.34395	0.00385967	no	no	no	no
YHR044C::chr8_1	YHR044C	DOG1	-0.00679346	-0.142153	0.469219	0.623377	no	no	no	no
YHR045W::chr00_8	YHR045W	YHR045W	-0.602089	-0.3514	0.87385	0.766672	no	no	no	no
YHR046C::chr8_2	YHR046C	INM1	-0.2003	0.459135	0.625513	0.191041	no	no	no	no
YHR047C::chr8_2	YHR047C	AAP1	0.337316	0.31234	0.216633	0.279633	no	no	no	no
YHR048W::chr8_2	YHR048W	YHK8	0.128551	0.254624	0.36127	0.319228	no	no	no	no
YHR049C-A::chr8_2	YHR049C-A	YHR049C-A	-0.0487532	-0.9645	0.503551	0.973792	no	no	no	no
YHR049W::chr8_2	YHR049W	FSH1	0.139199	0.531705	0.353116	0.154458	no	no	no	no
YHR051W::chr8_2	YHR051W	COX6	0.0861764	-0.18268	0.394319	0.65338	no	no	no	no
YHR058C::chr00_10	YHR058C	MED6	0.0946879	-1.35766	0.387611	0.996704	no	no	no	no
YHR067W::chr00_10	YHR067W	HTD2	0.473199	0.992839	0.143992	0.0268705	no	no	no	no
YHR070W::chr8_2	YHR070W	TRM5	0.414306	1.04288	0.173184	0.0212892	no	no	no	no
YHR073W::chr8_2	YHR073W	OSH3	-1.3893	-0.983116	0.997117	0.975951	no	no	no	no
YHR074W::chr8_2	YHR074W	QNS1	-0.749193	0.086543	0.926017	0.445259	no	yes	no	yes
YHR077C::chr8_2	YHR077C	NMD2	0.501769	0.715305	0.131101	0.0837348	no	no	no	no
YHR078W::chr8_2	YHR078W	YHR078W	-0.263766	-0.104678	0.673744	0.594948	no	no	no	no
YHR079C-B::chr00_3	YHR079C-A	SAE3	0.246924	1.00526	0.2749	0.0253814	no	no	no	no
YHR079C::chr8_2	YHR079C	IRE1	-0.183913	-0.394185	0.612697	0.791746	no	no	no	no
YHR080C::chr8_2	YHR080C	YHR080C	-1.21486	-0.635193	0.991862	0.901273	no	no	no	no
YHR081W::chr8_2	YHR081W	LRP1	0.341955	-0.0502302	0.213849	0.552776	no	no	no	no
YHR083W::chr8_2	YHR083W	SAM35	0.0665742	0.0361846	0.409885	0.484797	no	no	no	no
YHR084W::chr8_2	YHR084W	STE12	-0.415769	-0.68766	0.777061	0.918121	no	no	no	no
YHR088W::chr8_2	YHR088W	RPF1	0.250807	-0.372158	0.272247	0.779042	no	no	no	no
YHR091C::chr8_2	YHR091C	MSR1	0.0402401	-0.220155	0.431018	0.680297	no	no	no	no
YHR092C::chr8_2	YHR092C	HXT4	0.544753	0.0710761	0.113247	0.457363	no	no	no	no
YHR093W::chr8_2	YHR093W	AHT1	0.156009	0.295545	0.340378	0.290907	no	no	no	no
YHR094C::chr8_2	YHR094C	HXT1	-0.583384	0.423701	0.86572	0.210689	no	no	no	no
YHR095W::chr8_2	YHR095W	YHR095W	0.161255	-0.0991398	0.336439	0.5907	no	no	no	no
YHR096C::chr8_2	YHR096C	HXT5	0.137596	0.5872	0.354338	0.129832	no	no	no	no
YHR097C::chr8_2	YHR097C	YHR097C	-0.111763	0.654314	0.554977	0.103865	no	no	no	no
YHR100C::chr8_2	YHR100C	GEP4	0.0772708	-0.19462	0.401372	0.662049	no	no	no	no
YHR103W::chr8_2	YHR103W	SBE22	-0.577427	0.00223727	0.863056	0.511559	no	no	no	no
YHR104W::chr8_2	YHR104W	GRE3	-0.0540475	-0.405711	0.507886	0.798219	no	no	no	no
YHR106W::chr8_2	YHR106W	TRR2	0.436674	0.00635338	0.161681	0.508314	no	no	no	no
YHR109W::chr8_2	YHR109W	CTM1	0.143051	0.0346587	0.350182	0.485999	no	no	no	no
YHR110W::chr8_2	YHR110W	ERP5	0.590556	-0.249902	0.0962085	0.701016	no	no	no	no
YHR111W::chr8_2	YHR111W	UBA4	0.187797	-0.220155	0.316793	0.680297	no	no	no	no
YHR114W::chr8_2	YHR114W	BZZ1	0.312735	-0.0712918	0.231732	0.569188	no	no	no	no
YHR116W::chr8_2	YHR116W	COX23	-0.986232	-0.635193	0.973403	0.901273	no	no	no	no
YHR121W::chr8_2	YHR121W	LSM12	0.610703	0.0872734	0.0893419	0.444688	no	no	no	no
YHR125W::chr8_2	YHR125W	YHR125W	1.28055	1.30894	0.0032653	0.00532963	no	yes	no	yes
YHR127W::chr00_10	YHR127W	YHR127W	-0.419885	-1.4128	0.779574	0.997642	no	no	no	no
YHR129C::chr8_2	YHR129C	ARP1	0.627005	-0.170686	0.084058	0.644591	no	no	no	no
YHR130C::chr8_2	YHR130C	YHR130C	-0.427265	-0.120619	0.784038	0.607113	no	no	no	no
YHR131C::chr00_10	YHR131C	YHR131C	0.38009	-0.0502302	0.191762	0.552776	no	no	no	no
YHR132C::chr8_2	YHR132C	ECM14	-0.0413737	0.00223727	0.497508	0.511559	no	no	no	no
YHR132W-A::chr00_17b	YHR132W-A	IGO2	-0.0727689	1.20131	0.523206	0.00961726	no	no	no	no
YHR133C::chr8_2	YHR133C	NSG1	-0.61991	-0.313265	0.881271	0.74298	no	no	no	no
YHR134W::chr8_2	YHR134W	WSS1	-0.585694	0.0111704	0.866743	0.504517	no	no	no	no
YHR135C::chr8_2	YHR135C	YCK1	-0.526801	0.239276	0.838969	0.330141	no	no	no	no
YHR136C::chr8_2	YHR136C	SPL2	-0.642278	-0.0502302	0.890141	0.552776	no	no	no	no
YHR137W::chr8_2	YHR137W	ARO9	0.24493	0.172162	0.276267	0.37947	no	no	no	no
YHR138C::chr8_2	YHR138C	YHR138C	-0.0503625	-0.220155	0.504869	0.680297	no	no	no	no
YHR139C-A::chr8_2	YHR139C-A	YHR139C-A	-0.0638285	0.130342	0.515893	0.411294	no	no	no	no
YHR140W::chr00_8	YHR140W	YHR140W	-0.935272	-0.458701	0.96628	0.826394	no	no	no	no
YHR142W::chr8_3	YHR142W	CHS7	-0.136854	-0.0877049	0.575249	0.581896	no	no	no	no
YHR143W-A::chr8_3	YHR143W-A	RPC10	-0.315296	-1.17576	0.710914	0.990795	no	no	no	no
YHR143W::chr8_3	YHR143W	DSE2	-0.767809	0.016884	0.931224	0.500012	no	no	no	no
YHR146W::chr00_15	YHR146W	CRP1	-0.00323856	-0.918986	0.466318	0.967825	no	no	no	no
YHR148W::chr8_3	YHR148W	IMP3	-0.111763	-0.220155	0.554977	0.680297	no	no	no	no
YHR151C::chr8_3	YHR151C	MTC6	0.736234	0.101773	0.0545219	0.433389	no	no	no	no
YHR152W::chr8_3	YHR152W	SPO12	-0.526801	-0.345686	0.838969	0.763202	no	no	no	no
YHR157W::chr8_3	YHR157W	REC104	-0.459686	-0.876201	0.80302	0.961234	no	no	no	no
YHR158C::chr8_3	YHR158C	KEL1	0.753307	-0.132692	0.0507573	0.616256	no	no	no	no
YHR159W::chr8_3	YHR159W	TDA11	-0.111763	-0.635193	0.554977	0.901273	no	no	no	no
YHR164C::chr8_3	YHR164C	DNA2	-0.696726	-0.635193	0.909722	0.901273	no	no	no	no
YHR171W::chr00_15	YHR171W	ATG7	-0.0831939	-0.00716143	0.531723	0.518964	no	no	no	no
YHR172W::chr8_3	YHR172W	SPC97	-0.835736	-0.136773	0.947855	0.619333	no	no	no	no
YHR177W::chr8_3	YHR177W	YHR177W	-0.185764	-0.294156	0.614151	0.730654	no	no	no	no
YHR179W::chr8_3	YHR179W	OYE2	0.0861764	-0.256681	0.394319	0.705651	no	no	no	no
YHR181W::chr00_8	YHR181W	SVP26	-0.285792	0.480285	0.689873	0.179868	no	no	no	no
YHR182W::chr8_3	YHR182W	YHR182W	-0.835736	-1.3067	0.947855	0.995552	no	no	no	no
YHR184W::chr8_3	YHR184W	SSP1	-0.16423	0.534732	0.59714	0.15304	no	no	no	no
YHR186C::chr8_3	YHR186C	KOG1	-0.733251	-0.635193	0.921323	0.901273	no	no	no	no
YHR190W::chr8_3	YHR190W	ERG9	-0.642278	-0.220155	0.890141	0.680297	no	no	no	no
YHR195W::chr8_3	YHR195W	NVJ1	-0.919118	-0.220155	0.963719	0.680297	no	no	no	no
YHR198C::chr8_3	YHR198C	AIM18	0.0326269	0.265272	0.437168	0.311748	no	no	no	no
YHR199C::chr8_3	YHR199C	AIM46	0.058162	0.671505	0.416611	0.0978651	no	yes	no	yes
YHR200W::chr8_3	YHR200W	RPN10	1.05816	1.2717	0.0118069	0.0065677	no	no	no	no
YHR202W::chr8_3	YHR202W	YHR202W	0.31708	0.101773	0.229021	0.433389	no	no	no	no
YHR203C::chr8_3	YHR203C	RPS4B	-0.411323	-0.841644	0.774329	0.955141	no	no	no	no
YHR206W::chr8_3	YHR206W	SKN7	-0.251166	-0.503948	0.664367	0.848364	no	no	no	no
YHR207C::chr8_3	YHR207C	SET5	-1.24301	-0.149766	0.993062	0.629076	no	no	no	no
YHR209W::chr8_3	YHR209W	CRG1	-0.477891	0.101773	0.813221	0.433389	no	no	no	no
YIL002C::chr9_1	YIL002C	INP51	-1.55655	-1.05023	0.999046	0.982534	no	no	no	no
YIL003W::chr9_1	YIL003W	CFD1	-0.397517	-0.791312	0.765725	0.944912	no	no	no	no
YIL004C::chr9_1	YIL004C	BET1	-0.488326	-0.19462	0.818918	0.662049	no	no	no	no
YIL005W::chr9_1	YIL005W	EPS1	0.0257405	-1.12996	0.442743	0.988297	no	no	no	no
YIL006W::chr9_1	YIL006W	YIA6	-0.40127	-0.372158	0.768081	0.779042	no	no	no	no
YIL008W::chr9_1	YIL008W	URM1	0.288775	0.364807	0.246997	0.245842	no	no	no	no
YIL009C-A::chr00_3	YIL009C-A	EST3	-0.183913	0.364807	0.612697	0.245842	no	no	no	no
YIL009W::chr9_1	YIL009W	FAA3	0.151271	-0.137693	0.34395	0.620025	no	no	no	no
YIL010W::chr9_1	YIL010W	DOT5	0.473199	-0.0502302	0.143992	0.552776	no	no	no	no
YIL011W::chr9_1	YIL011W	TIR3	0.271566	-0.48319	0.258284	0.838524	no	no	no	no
YIL013C::chr9_1	YIL013C	PDR11	-0.614263	-0.722655	0.878953	0.92809	no	no	no	no
YIL017C::chr9_1	YIL017C	VID28	-0.387824	0.0726266	0.759576	0.456147	no	no	no	no
YIL018W::chr9_1	YIL018W	RPL2B	0.347669	0.654314	0.210448	0.103865	no	no	no	no
YIL020C::chr9_1	YIL020C	HIS6	0.795128	0.101773	0.0424079	0.433389	no	no	no	no
YIL021W::chr9_1	YIL021W	RPB3	-1.13978	-1.07129	0.987729	0.984253	no	no	no	no
YIL022W::chr9_1	YIL022W	TIM44	0.168345	-0.54773	0.331145	0.867783	no	no	no	no
YIL023C::chr9_1	YIL023C	YKE4	-0.22724	-0.635193	0.64628	0.901273	no	no	no	no
YIL024C::chr9_1	YIL024C	YIL024C	0.285572	0.94977	0.249077	0.0326065	no	no	no	no
YIL025C::chr9_1	YIL025C	YIL025C	0.440778	0.364807	0.159625	0.245842	no	no	no	no
YIL027C::chr9_1	YIL027C	EMC5	0.0443562	-0.256681	0.4277	0.705651	no	no	no	no
YIL030C::chr00_17b	YIL030C	SSM4	-0.408156	0.0277724	0.772371	0.491427	no	no	no	no
YIL032C::chr9_1	YIL032C	YIL032C	0.665845	1.36481	0.0724186	0.00385967	no	no	no	no
YIL034C::chr9_1	YIL034C	CAP2	-0.822256	0.824239	0.944838	0.0552794	no	no	no	no
YIL035C::chr9_1	YIL035C	CKA1	-0.374797	0.599273	0.751177	0.124857	no	no	no	no
YIL037C::chr9_1	YIL037C	PRM2	-0.323267	0.290807	0.716481	0.294126	no	no	no	no
YIL038C::chr9_1	YIL038C	NOT3	-0.0938411	0.419255	0.540406	0.213235	no	no	no	no
YIL040W::chr9_1	YIL040W	APQ12	-0.822256	-0.497689	0.944838	0.84544	no	no	no	no
YIL042C::chr9_1	YIL042C	PKP1	-0.151291	1.62784	0.586827	0.000726312	no	no	no	yes
YIL043C::chr9_1	YIL043C	CBR1	0.0137679	0.0428793	0.452463	0.479523	no	no	no	no
YIL046W::chr9_1	YIL046W	MET30	-0.197493	0.121536	0.623328	0.418078	no	no	no	no
YIL049W::chr9_1	YIL049W	DFG10	0.00925238	0.178394	0.456137	0.374791	no	no	no	no
YIL051C::chr9_1	YIL051C	MMF1	-0.304408	-0.4128	0.703227	0.80214	no	no	no	no
YIL059C::chr9_1	YIL059C	YIL059C	0.331844	-0.191586	0.219944	0.659854	no	no	no	no
YIL060W::chr9_1	YIL060W	YIL060W	1.3097	-0.239264	0.00272038	0.693677	no	no	no	no
YIL062C::chr9_1	YIL062C	ARC15	0.177744	-0.345686	0.324178	0.763202	no	no	no	no
YIL063C::chr9_1	YIL063C	YRB2	0.557264	0.285373	0.108393	0.297837	no	no	no	no
YIL064W::chr9_1	YIL064W	SEE1	-0.0122273	-0.635193	0.473658	0.901273	no	no	no	no
YIL066C::chr9_1	YIL066C	RNR3	0.0257405	0.016884	0.442743	0.500012	no	no	no	no
YIL068C::chr9_1	YIL068C	SEC6	-0.24503	0.0710761	0.659762	0.457363	no	no	no	no
YIL069C::chr9_1	YIL069C	RPS24B	-0.208625	0.426208	0.631973	0.209261	no	no	no	no
YIL072W::chr9_1	YIL072W	HOP1	-0.526801	-0.359558	0.838969	0.771579	no	no	no	no
YIL073C::chr9_1	YIL073C	SPO22	-0.0683704	-0.120619	0.519609	0.607113	no	no	no	no
YIL075C::chr9_1	YIL075C	RPN2	-0.568621	-0.45462	0.859054	0.824318	no	no	no	no
YIL076W::chr9_1	YIL076W	SEC28	-0.000731705	-0.787196	0.464272	0.944	no	no	no	no
YIL078W::chr9_1	YIL078W	THS1	-0.941838	-0.372158	0.967278	0.779042	no	no	no	no
YIL079C::chr9_1	YIL079C	AIR1	0.326358	0.5872	0.223293	0.129832	no	no	no	no
YIL083C::chr9_1	YIL083C	CAB2	-0.0727689	0.308224	0.523206	0.282377	no	no	no	no
YIL084C::chr9_1	YIL084C	SDS3	-0.585694	-0.857585	0.866743	0.958041	no	no	no	no
YIL085C::chr9_1	YIL085C	KTR7	0.261695	-0.294156	0.264877	0.730654	no	no	no	no
YIL086C::chr9_1	YIL086C	YIL086C	-0.508023	-0.731408	0.829371	0.930431	no	no	no	no
YIL087C::chr9_1	YIL087C	AIM19	-0.762017	-1.25968	0.929635	0.994184	no	no	no	no
YIL088C::chr9_1	YIL088C	AVT7	0.45708	0.11262	0.151631	0.424972	no	no	no	no
YIL089W::chr9_1	YIL089W	YIL089W	0.473199	0.976242	0.143992	0.0289723	no	no	no	no
YIL090W::chr9_1	YIL090W	ICE2	-0.556548	-0.442548	0.853438	0.818083	no	no	no	no
YIL091C::chr9_1	YIL091C	UTP25	0.433671	0.0753007	0.163195	0.454052	no	no	no	no
YIL092W::chr9_1	YIL092W	YIL092W	-0.444338	0.0753007	0.794163	0.454052	no	no	no	no
YIL093C::chr9_1	YIL093C	RSM25	-0.204872	0.101773	0.629066	0.433389	no	no	no	no
YIL094C::chr9_1	YIL094C	LYS12	-0.749193	-0.490803	0.926017	0.84218	no	no	no	no
YIL095W::chr9_1	YIL095W	PRK1	-0.89245	0.158356	0.959143	0.389897	no	no	no	no
YIL097W::chr9_1	YIL097W	FYV10	0.53733	0.402942	0.1162	0.22273	no	no	no	no
YIL098C::chr9_2	YIL098C	FMC1	-0.269304	-0.220155	0.677832	0.680297	no	no	no	no
YIL099W::chr9_2	YIL099W	SGA1	-0.652331	0.016884	0.893969	0.500012	no	no	no	no
YIL100W::chr9_2	YIL100W	YIL100W	-0.00484781	0.00223727	0.467631	0.511559	no	no	no	no
YIL101C::chr9_2	YIL101C	XBP1	0.485478	0.41456	0.138351	0.215943	no	no	no	no
YIL102C::chr9_2	YIL102C	YIL102C	-0.848729	-0.957121	0.950639	0.972893	no	no	no	no
YIL104C::chr9_2	YIL104C	SHQ1	-0.13561	0.438808	0.574248	0.202171	no	no	no	no
YIL105C::chr9_2	YIL105C	SLM1	-0.774728	-0.635193	0.933085	0.901273	no	no	no	no
YIL106W::chr9_2	YIL106W	MOB1	-0.158156	1.03723	0.592306	0.0218654	no	no	no	no
YIL107C::chr9_2	YIL107C	PFK26	0.058162	0.94977	0.416611	0.0326065	no	no	no	no
YIL108W::chr9_2	YIL108W	YIL108W	0.321196	-0.0502302	0.226469	0.552776	no	no	no	no
YIL110W::chr9_2	YIL110W	HPM1	0.566309	-0.39008	0.104978	0.789412	no	no	no	no
YIL112W::chr9_2	YIL112W	HOS4	0.119563	0.212804	0.368204	0.349303	no	no	no	no
YIL114C::chr9_2	YIL114C	POR2	-1.05732	-2.10912	0.981203	0.999987	no	no	no	no
YIL116W::chr9_2	YIL116W	HIS5	0.501214	0.111051	0.131344	0.426188	no	no	no	no
YIL117C::chr9_2	YIL117C	PRM5	-0.29939	-0.635193	0.699654	0.901273	no	no	no	no
YIL120W::chr9_2	YIL120W	QDR1	-0.374797	-0.0137043	0.751177	0.524116	no	no	no	no
YIL121W::chr9_2	YIL121W	QDR2	0.193092	0.0846994	0.312933	0.446699	no	no	no	no
YIL122W::chr9_2	YIL122W	POG1	0.210165	0.101773	0.300626	0.433389	no	no	no	no
YIL124W::chr9_2	YIL124W	AYR1	0.707665	0.227304	0.0613111	0.338756	no	no	no	no
YIL126W::chr9_2	YIL126W	STH1	1.16508	1.4352	0.00651719	0.0025297	no	no	no	no
YIL128W::chr9_2	YIL128W	MET18	0.151271	-0.313265	0.34395	0.74298	no	no	no	no
YIL129C::chr9_2	YIL129C	TAO3	-1.82636	0.0652471	0.999873	0.461935	no	no	no	no
YIL132C::chr9_2	YIL132C	CSM2	-0.139777	0.282345	0.577599	0.299914	no	no	no	no
YIL133C::chr9_2	YIL133C	RPL16A	-0.974259	-0.876201	0.971854	0.961234	no	no	no	no
YIL134W::chr9_2	YIL134W	FLX1	-0.935272	-1.4587	0.96628	0.99823	no	no	no	no
YIL135C::chr9_2	YIL135C	VHS2	-0.200572	1.29769	0.625726	0.00567951	no	no	no	no
YIL136W::chr9_2	YIL136W	OM45	0.588677	0.111051	0.0968685	0.426188	no	no	no	no
YIL137C::chr9_2	YIL137C	TMA108	0.396578	0.502311	0.182662	0.168678	no	no	no	no
YIL138C::chr9_2	YIL138C	TPM2	0.523826	-0.169529	0.121711	0.643738	no	no	no	no
YIL140W::chr9_2	YIL140W	AXL2	-0.0256064	0.133482	0.484599	0.408881	no	no	no	no
YIL141W::chr9_2	YIL141W	YIL141W	0.442173	0.981479	0.158931	0.0282949	no	no	no	no
YIL145C::chr9_2	YIL145C	PAN6	-0.731915	-0.272623	0.92092	0.716417	no	no	no	no
YIL146C::chr9_2	YIL146C	ATG32	0.0102275	-0.470133	0.455343	0.832127	no	no	no	no
YIL147C::chr9_2	YIL147C	SLN1	-1.00073	-1.16571	0.975183	0.990291	no	no	no	no
YIL149C::chr9_2	YIL149C	MLP2	-0.0272295	0.0785032	0.485928	0.451545	no	no	no	no
YIL150C::chr9_2	YIL150C	MCM10	-0.719446	-0.0502302	0.917079	0.552776	no	no	no	no
YIL152W::chr9_2	YIL152W	YIL152W	-0.526801	-0.220155	0.838969	0.680297	no	no	no	no
YIL154C::chr9_2	YIL154C	IMP2'	-0.928899	0.172162	0.965288	0.37947	no	no	no	no
YIL155C::chr9_2	YIL155C	GUT2	0.317921	-0.0826516	0.228498	0.577992	no	no	no	no
YIL156W::chr9_2	YIL156W	UBP7	-0.159069	-0.171246	0.593034	0.645002	no	no	no	no
YIL157C::chr9_2	YIL157C	COA1	0.0206873	-0.294156	0.446842	0.730654	no	no	no	no
YIL158W::chr9_2	YIL158W	AIM20	-0.92166	-0.403867	0.964132	0.797192	no	no	no	no
YIL159W::chr9_2	YIL159W	BNR1	-0.22724	-0.509662	0.64628	0.851	no	no	no	no
YIL161W::chr9_2	YIL161W	YIL161W	-0.556548	0.305914	0.853438	0.283922	no	no	no	no
YIL162W::chr9_2	YIL162W	SUC2	-0.604803	0.212804	0.875	0.349303	no	no	no	no
YIL163C::chr9_2	YIL163C	YIL163C	-0.189766	0.142415	0.617289	0.402037	no	no	no	no
YIL164C::chr9_2	YIL164C	NIT1	0.218627	0.44281	0.294608	0.199949	no	no	no	no
YIL166C::chr9_2	YIL166C	YIL166C	0.61942	0.280415	0.0864865	0.301242	no	no	no	no
YIL167W::chr9_2	YIL167W	SDL1	0.434725	0.181943	0.162662	0.372134	no	no	no	no
YIL168W::chr9_2	YIL168W	YIL168W	0.288775	0.0693515	0.246997	0.458715	no	no	no	no
YIL171W::chr9_2	YIL171W	YIL171W	-0.102661	-0.66216	0.547585	0.910225	no	no	no	no
YIR001C::chr9_2	YIR001C	SGN1	0.0861764	-0.361018	0.394319	0.772451	no	no	no	no
YIR003W::chr9_2	YIR003W	AIM21	-0.0122273	1.68674	0.473658	0.000482757	no	no	no	yes
YIR004W::chr9_2	YIR004W	DJP1	-0.633716	0.257892	0.886803	0.316924	no	no	no	no
YIR005W::chr9_2	YIR005W	IST3	-0.57571	-0.532099	0.862282	0.861057	no	no	no	no
YIR009W::chr9_2	YIR009W	MSL1	-0.848729	0.086543	0.950639	0.445259	no	yes	no	yes
YIR010W::chr9_2	YIR010W	DSN1	-0.941838	-0.787196	0.967278	0.944	no	no	no	no
YIR012W::chr9_2	YIR012W	SQT1	-0.715834	0.201309	0.915941	0.357749	no	no	no	no
YIR015W::chr9_2	YIR015W	RPR2	0.116043	0.285952	0.370931	0.29744	no	no	no	no
YIR016W::chr9_2	YIR016W	YIR016W	-0.69345	-0.664339	0.908623	0.910921	no	no	no	no
YIR017C::chr00_3	YIR017C	MET28	0.162859	0.201309	0.335239	0.357749	no	no	no	no
YIR018W::chr00_3	YIR018W	YAP5	0.228087	-0.128233	0.287947	0.612886	no	no	no	no
YIR019C::chr00_3	YIR019C	MUC1	0.290996	0.257892	0.24556	0.316924	no	no	no	no
YIR020C::chr00_3	YIR020C	YIR020C	-0.352771	-0.423689	0.736628	0.808071	no	no	no	no
YIR020W-B::chr00_3	YIR020W-A	YIR020W-A	-0.221946	-0.149766	0.642231	0.629076	no	no	no	no
YIR021W::chr00_3	YIR021W	MRS1	-0.0923977	-0.0787993	0.53923	0.57501	no	no	no	no
YIR022W::chr00_3	YIR022W	SEC11	0.543589	0.0201592	0.113707	0.497429	no	no	no	no
YIR026C::chr00_3	YIR026C	YVH1	-0.433691	0.194882	0.787882	0.362502	no	no	no	no
YIR028W::chr00_3	YIR028W	DAL4	-0.0413737	-1.22016	0.497508	0.992757	no	no	no	no
YIR029W::chr00_3	YIR029W	DAL2	-0.148289	0.480285	0.584425	0.179868	no	no	no	no
YIR031C::chr00_3	YIR031C	DAL7	-0.218678	1.20202	0.639724	0.0095811	no	yes	no	yes
YIR032C::chr00_17b	YIR032C	DAL3	-0.647095	-0.503948	0.891987	0.848364	no	no	no	no
YIR033W::chr00_3	YIR033W	MGA2	-0.526801	0.308935	0.838969	0.281901	no	yes	no	yes
YIR035C::chr00_3	YIR035C	YIR035C	-0.526801	-1.34569	0.838969	0.996461	no	no	no	no
YIR038C::chr00_3	YIR038C	GTT1	-0.919118	-0.694086	0.963719	0.920025	no	no	no	no
YIR042C::chr00_3	YIR042C	YIR042C	-1.11176	-1.22016	0.985775	0.992757	no	no	no	no
YIR044C::chr00_17b	YIR044C	YIR044C	-1.02157	-0.497689	0.977565	0.84544	no	no	no	no
YJL001W::chr00_13	YJL001W	PRE3	0.303274	0.779845	0.237696	0.0657846	no	no	no	no
YJL004C::chr00_13	YJL004C	SYS1	-0.656084	-0.542083	0.895373	0.86538	no	no	no	no
YJL005W::chr00_13	YJL005W	CYR1	-0.526801	0.00223727	0.838969	0.511559	no	no	no	no
YJL006C::chr00_13	YJL006C	CTK2	-0.0659593	0.457917	0.517636	0.191697	no	no	no	no
YJL007C::chr00_13	YJL007C	YJL007C	-0.249267	0.0428793	0.662944	0.479523	no	no	no	no
YJL010C::chr00_13	YJL010C	NOP9	-0.218678	-0.841644	0.639724	0.955141	no	no	no	no
YJL012C::chr00_13	YJL012C	VTC4	-0.211927	-0.355085	0.634525	0.768896	no	no	no	no
YJL013C::chr00_13	YJL013C	MAD3	-0.185764	0.80538	0.614151	0.0595678	no	no	no	no
YJL015C::chr00_13	YJL015C	YJL015C	-0.149433	-0.724002	0.585341	0.928454	no	no	no	no
YJL016W::chr00_13	YJL016W	YJL016W	-0.374797	-1.06815	0.751177	0.984007	no	no	no	no
YJL019W::chr00_13	YJL019W	MPS3	-0.848729	0.364807	0.950639	0.245842	no	no	no	no
YJL020C::chr00_13	YJL020C	BBC1	0.130312	-0.135622	0.359917	0.618465	no	no	no	no
YJL021C::chr00_13	YJL020C	BBC1	-0.447366	-0.149766	0.795929	0.629076	no	no	no	no
YJL023C::chr00_13	YJL023C	PET130	0.0194815	0.133482	0.447821	0.408881	no	no	no	no
YJL025W::chr00_13	YJL025W	RRN7	-0.204872	-0.497689	0.629066	0.84544	no	no	no	no
YJL026W::chr00_13	YJL026W	RNR2	-0.759461	-0.561192	0.928925	0.873394	no	no	no	no
YJL027C::chr00_13	YJL027C	YJL027C	0.326358	0.850234	0.223293	0.0497723	no	no	no	no
YJL030W::chr10_2	YJL030W	MAD2	0.268841	0.133482	0.260096	0.408881	no	no	no	no
YJL031C::chr10_2	YJL031C	BET4	-0.0778157	0.621147	0.52733	0.116184	no	no	no	no
YJL033W::chr10_2	YJL033W	HCA4	-0.0635539	0.305101	0.515668	0.284466	no	no	no	no
YJL036W::chr10_2	YJL036W	SNX4	0.0789205	0.406628	0.400063	0.220564	no	no	no	no
YJL039C::chr10_2	YJL039C	NUP192	0.0326269	0.5872	0.437168	0.129832	no	no	no	no
YJL041W::chr00_15	YJL041W	NSP1	-0.658045	-0.149766	0.896101	0.629076	no	no	no	no
YJL042W::chr00_15	YJL042W	MHP1	-0.0673689	0.55122	0.518789	0.145468	no	no	no	no
YJL043W::chr10_2	YJL043W	YJL043W	-0.263766	0.757125	0.673744	0.0717287	no	no	no	no
YJL044C::chr10_2	YJL044C	GYP6	-0.391871	2.30894	0.762154	2.94711e-06	no	yes	no	yes
YJL046W::chr10_2	YJL046W	AIM22	0.958626	1.30894	0.0197457	0.00532963	no	yes	no	yes
YJL047C::chr10_2	YJL047C	RTT101	-1.58125	-0.394185	0.999197	0.791746	no	no	no	no
YJL048C::chr10_2	YJL048C	UBX6	-1.69673	-1.05023	0.999653	0.982534	no	no	no	no
YJL050W::chr10_2	YJL050W	MTR4	0.335696	-0.120619	0.21761	0.607113	no	no	no	no
YJL051W::chr10_2	YJL051W	IRC8	-0.749193	1.40847	0.926017	0.00297608	no	yes	no	yes
YJL053W::chr10_2	YJL053W	PEP8	0.30719	0.330042	0.235218	0.267985	no	no	no	no
YJL054W::chr10_2	YJL054W	TIM54	0.125276	0.708762	0.363791	0.0857424	no	no	no	no
YJL055W::chr10_2	YJL055W	YJL055W	0.158326	0.137397	0.338636	0.405878	no	no	no	no
YJL056C::chr10_2	YJL056C	ZAP1	-0.0122273	0.163173	0.473658	0.386249	no	no	no	no
YJL060W::chr10_2	YJL060W	BNA3	-0.422464	0.147216	0.78114	0.39837	no	no	no	no
YJL061W::chr10_2	YJL061W	NUP82	-0.389297	-1.26322	0.760516	0.994299	no	no	no	no
YJL064W::chr10_2	YJL064W	YJL064W	-0.199226	-0.0275101	0.624678	0.534971	no	no	no	no
YJL066C::chr10_2	YJL066C	MPM1	-0.249267	-0.400727	0.662944	0.795435	no	no	no	no
YJL068C::chr10_2	YJL068C	YJL068C	0.276802	0.305914	0.254822	0.283922	no	no	no	no
YJL069C::chr10_2	YJL069C	UTP18	0.439252	0.850234	0.160387	0.0497723	no	no	no	no
YJL070C::chr00_15	YJL070C	YJL070C	0.156726	0.138531	0.339839	0.405009	no	no	no	no
YJL074C::chr10_2	YJL074C	SMC3	0.742386	-0.0806038	0.0531407	0.576407	no	no	no	no
YJL075C::chr10_2	YJL075C	APQ13	-0.711225	-0.234655	0.914471	0.690472	no	no	no	no
YJL076W::chr10_2	YJL076W	NET1	-0.125438	0.0346587	0.566047	0.485999	no	no	no	no
YJL078C::chr00_15	YJL078C	PRY3	0.0513728	0.0927278	0.422056	0.440432	no	no	no	no
YJL079C::chr10_2	YJL079C	PRY1	0.352905	0.0810144	0.20736	0.44958	no	no	no	no
YJL080C::chr10_2	YJL080C	SCP160	0.359989	0.279077	0.203225	0.302163	no	no	no	no
YJL081C::chr10_2	YJL081C	ARP4	0.580115	-0.149766	0.0999165	0.629076	no	no	no	no
YJL082W::chr10_2	YJL082W	IML2	-0.356876	0.212804	0.739372	0.349303	no	no	no	no
YJL083W::chr10_2	YJL083W	TAX4	0.335696	0.101773	0.21761	0.433389	no	no	no	no
YJL084C::chr10_2	YJL084C	ALY2	0.508823	-0.801203	0.128045	0.947056	no	no	no	no
YJL085W::chr10_2	YJL085W	EXO70	0.0478936	-0.206349	0.424853	0.670482	no	no	no	no
YJL086C::chr10_2	YJL086C	YJL086C	0.0993846	-0.100155	0.383923	0.59148	no	no	no	no
YJL087C::chr10_2	YJL087C	TRL1	0.193092	0.5872	0.312933	0.129832	no	no	no	no
YJL088W::chr10_2	YJL088W	ARG3	0.0402401	-0.171246	0.431018	0.645002	no	no	no	no
YJL091C::chr10_2	YJL091C	GWT1	-0.0456738	0.301614	0.501029	0.286809	no	no	no	no
YJL092W::chr10_2	YJL092W	SRS2	0.0435152	-0.0204828	0.428378	0.529449	no	no	no	no
YJL094C::chr00_15	YJL094C	KHA1	-0.739794	-0.635193	0.923276	0.901273	no	no	no	no
YJL096W::chr10_2	YJL096W	MRPL49	-0.678804	-0.924699	0.903586	0.968631	no	no	no	no
YJL097W::chr00_15	YJL097W	PHS1	0.768655	0.94977	0.0475527	0.0326065	no	no	no	no
YJL098W::chr10_2	YJL098W	SAP185	-0.111763	0.172162	0.554977	0.37947	no	no	no	no
YJL100W::chr10_2	YJL100W	LSB6	-0.365049	-0.0502302	0.744792	0.552776	no	no	no	no
YJL101C::chr00_15	YJL101C	GSH1	-0.696726	-0.635193	0.909722	0.901273	no	no	no	no
YJL103C::chr00_18	YJL103C	GSM1	-1.44434	-0.787196	0.997972	0.944	no	no	no	no
YJL104W::chr10_2	YJL104W	PAM16	-0.321981	0.130342	0.715586	0.411294	no	no	no	no
YJL106W::chr10_2	YJL106W	IME2	-0.0813894	0.557452	0.530249	0.142672	no	no	no	no
YJL107C::chr10_2	YJL107C	YJL107C	-0.544288	-0.277641	0.847584	0.719767	no	no	no	no
YJL109C::chr10_2	YJL109C	UTP10	0.321196	0.464343	0.226469	0.188251	no	no	no	no
YJL112W::chr10_2	YJL112W	MDV1	1.3145	0.20611	0.00263895	0.354213	no	no	no	no
YJL117W::chr10_2	YJL117W	PHO86	-1.1745	-0.635193	0.989824	0.901273	no	no	no	no
YJL119C::chr10_2	YJL119C	YJL119C	1.4732	0.94977	0.000918676	0.0326065	no	no	yes	no
YJL120W::chr10_2	YJL120W	YJL120W	0.388311	-0.175761	0.187191	0.648319	no	no	no	no
YJL121C::chr10_2	YJL121C	RPE1	0.669597	0.445727	0.071363	0.198339	no	no	no	no
YJL122W::chr10_2	YJL122W	ALB1	0.23616	0.471723	0.28232	0.18434	no	no	no	no
YJL124C::chr10_2	YJL124C	LSM1	0.520505	0.231541	0.123093	0.335698	no	no	no	no
YJL126W::chr10_2	YJL126W	NIT2	-0.187314	-0.140428	0.615368	0.622081	no	no	no	no
YJL127C::chr10_2	YJL127C	SPT10	-0.384782	-0.679587	0.757629	0.91568	no	no	no	no
YJL130C::chr10_1	YJL130C	URA2	-0.182152	0.686735	0.611312	0.0927658	no	no	no	no
YJL132W::chr00_14	YJL132W	YJL132W	0.545349	0.0219196	0.113013	0.496041	no	no	no	no
YJL132W::chr10_1	YJL132W	YJL132W	-0.194225	0.282345	0.620778	0.299914	no	no	no	no
YJL134W::chr10_1	YJL134W	LCB3	0.50068	0.0927278	0.131577	0.440432	no	no	no	no
YJL135W::chr10_1	YJL135W	YJL135W	-0.0487532	-0.157145	0.503551	0.634574	no	no	no	no
YJL136C::chr00_14	YJL136C	RPS21B	0.21686	-0.220155	0.29586	0.680297	no	no	no	no
YJL137C::chr00_14	YJL137C	GLG2	-0.79689	-0.132692	0.938786	0.616256	no	no	no	no
YJL142C::chr10_1	YJL142C	IRC9	0.707665	0.0428793	0.0613111	0.479523	no	no	no	no
YJL143W::chr10_1	YJL143W	TIM17	0.0295928	-0.635193	0.439623	0.901273	no	no	no	no
YJL144W::chr10_1	YJL144W	YJL144W	0.0371004	-0.592124	0.433552	0.885651	no	no	no	no
YJL145W::chr10_1	YJL145W	SFH5	-0.218678	-0.256681	0.639724	0.705651	no	no	no	no
YJL147C::chr10_1	YJL147C	YJL147C	0.165077	0.0566851	0.333581	0.468661	no	no	no	no
YJL148W::chr10_1	YJL148W	RPA34	-0.223408	-0.362174	0.643351	0.77314	no	no	no	no
YJL149W::chr10_1	YJL149W	DAS1	-0.243008	-0.178335	0.65824	0.650205	no	no	no	no
YJL150W::chr10_1	YJL150W	YJL150W	0.340749	0.605815	0.214571	0.122216	no	no	no	no
YJL151C::chr00_14	YJL151C	SNA3	0.9757	1.13034	0.0181265	0.013879	no	no	no	no
YJL154C::chr10_1	YJL154C	VPS35	0.51502	0.101773	0.125401	0.433389	no	no	no	no
YJL156C::chr10_1	YJL156C	SSY5	-0.325167	0.718444	0.7178	0.082784	no	no	no	no
YJL157C::chr10_1	YJL157C	FAR1	-0.238998	-0.0348001	0.655213	0.540694	no	no	no	no
YJL158C::chr10_1	YJL158C	CIS3	-0.396216	0.480285	0.764904	0.179868	no	no	no	no
YJL159W::chr10_1	YJL159W	HSP150	-0.473029	-0.322035	0.810529	0.748537	no	no	no	no
YJL160C::chr00_14	YJL160C	YJL160C	-0.757098	-0.32707	0.928264	0.751699	no	no	no	no
YJL160C::chr10_1	YJL160C	YJL160C	-0.214857	-0.372158	0.636784	0.779042	no	no	no	no
YJL161W::chr00_14	YJL161W	FMP33	-1.22724	-0.805118	0.99241	0.947886	no	no	no	no
YJL165C::chr00_14	YJL165C	HAL5	0.59873	1.08654	0.0933772	0.0172524	no	yes	no	yes
YJL166W::chr10_1	YJL166W	QCR8	-0.848729	0.823509	0.950639	0.0554409	no	yes	no	yes
YJL167W::chr10_1	YJL167W	ERG20	0.647229	0.239276	0.0778332	0.330141	no	no	no	no
YJL168C::chr10_1	YJL168C	SET2	-0.0413737	1.17216	0.497508	0.011205	no	no	no	no
YJL169W::chr10_1	YJL169W	YJL169W	-0.00792721	-1.02751	0.470145	0.980503	no	no	no	no
YJL170C::chr10_1	YJL170C	ASG7	0.40105	-0.479073	0.180241	0.836525	no	no	no	no
YJL172W::chr00_14	YJL172W	CPS1	0.168345	0.867308	0.331145	0.0463999	no	no	no	no
YJL175W::chr00_14	YJL175W	YJL175W	-1.19831	-0.944128	0.991074	0.971247	no	no	no	no
YJL176C::chr10_1	YJL176C	SWI3	-0.178877	1.4352	0.608733	0.0025297	no	no	no	no
YJL182C::chr10_1	YJL182C	YJL182C	-0.0413737	-0.4128	0.497508	0.80214	no	no	no	no
YJL183W::chr10_1	YJL183W	MNN11	1.04148	0.791072	0.0129031	0.0629919	no	no	no	no
YJL184W::chr10_1	YJL184W	GON7	-0.158156	0.94977	0.592306	0.0326065	no	no	no	no
YJL185C::chr10_1	YJL185C	YJL185C	-0.178877	-0.149766	0.608733	0.629076	no	no	no	no
YJL186W::chr10_1	YJL186W	MNN5	0.318871	0.189721	0.227909	0.366334	no	no	no	no
YJL190C::chr10_1	YJL190C	RPS22A	0.873737	0.016884	0.0297304	0.500012	no	no	no	no
YJL191W::chr00_14	YJL191W	RPS14B	-0.219619	0.467169	0.640446	0.186747	no	no	no	no
YJL192C::chr10_1	YJL192C	SOP4	1.90616	0.364807	3.1126e-05	0.245842	no	no	yes	no
YJL193W::chr10_1	YJL193W	YJL193W	-0.16423	-0.713195	0.59714	0.925491	no	no	no	no
YJL194W::chr10_1	YJL194W	CDC6	-0.526801	-1.14977	0.838969	0.989441	no	no	no	no
YJL195C::chr10_1	YJL195C	YJL195C	-0.334155	-1.13769	0.724002	0.988756	no	no	no	no
YJL197W::chr10_1	YJL197W	UBP12	-1.33416	-1.05023	0.995946	0.982534	no	no	no	no
YJL198W::chr10_1	YJL198W	PHO90	0.0326269	0.172162	0.437168	0.37947	no	no	no	no
YJL199C::chr10_1	YJL199C	MBB1	-0.941838	0.627842	0.967278	0.113617	no	no	no	no
YJL201W::chr10_1	YJL201W	ECM25	0.682653	0.326333	0.067782	0.270405	no	no	no	no
YJL202C::chr00_14	YJL202C	YJL202C	-0.0461747	0.271698	0.50144	0.30727	no	no	no	no
YJL203W::chr10_1	YJL203W	PRP21	-0.34783	-0.728302	0.733306	0.929607	no	no	no	no
YJL206C-A::chr10_1	YJL205C	NCE101	-0.566329	-0.635193	0.857999	0.901273	no	no	no	no
YJL206C::chr00_14	YJL206C	YJL206C	-1.1745	-0.898227	0.989824	0.964753	no	no	no	no
YJL207C::chr10_1	YJL207C	LAA1	-0.0122273	0.101773	0.473658	0.433389	no	no	no	no
YJL208C::chr10_1	YJL208C	NUC1	-1.47433	-0.149766	0.998334	0.629076	no	no	no	no
YJL209W::chr10_1	YJL209W	CBP1	0.241874	0.0810144	0.278369	0.44958	no	no	no	no
YJL210W::chr10_1	YJL210W	PEX2	-1.89603	-1.37216	0.999928	0.996978	no	no	no	no
YJL211C::chr10_1	YJL211C	YJL211C	-0.981366	0.797767	0.972782	0.0613712	no	no	no	no
YJL212C::chr10_1	YJL212C	OPT1	0.269666	0.0872734	0.259547	0.444688	no	no	no	no
YJL213W::chr00_14	YJL213W	YJL213W	0.473199	-0.0826516	0.143992	0.577992	no	no	no	no
YJL214W::chr10_1	YJL214W	HXT8	0.366284	1.20202	0.199592	0.0095811	no	yes	no	yes
YJL217W::chr10_1	YJL217W	REE1	-0.444338	-0.857585	0.794163	0.958041	no	no	no	no
YJL218W::chr10_1	YJL218W	YJL218W	-0.419885	-0.528277	0.779574	0.859377	no	no	no	no
YJR001W::chr00_13	YJR001W	AVT1	0.5472	0.51681	0.112286	0.161561	no	no	no	no
YJR003C::chr00_17b	YJR003C	YJR003C	-0.0987069	0.404336	0.544369	0.22191	no	no	no	no
YJR004C::chr00_13	YJR004C	SAG1	-0.263766	-0.0502302	0.673744	0.552776	no	no	no	no
YJR005W::chr00_13	YJR005W	APL1	-0.356876	0.0753007	0.739372	0.454052	no	no	no	no
YJR007W::chr00_13	YJR007W	SUI2	0.551202	1.61273	0.110726	0.000804895	no	no	no	yes
YJR008W::chr00_13	YJR008W	MHO1	0.473199	-0.11436	0.143992	0.602348	no	no	no	no
YJR009C::chr00_13	YJR009C	TDH2	-0.0487532	0.562747	0.503551	0.140326	no	no	no	no
YJR011C::chr00_13	YJR011C	YJR011C	-0.393534	0.644915	0.763209	0.107255	no	no	no	no
YJR018W::chr00_13	YJR018W	YJR018W	-0.812203	-1.09462	0.942498	0.985986	no	no	no	no
YJR019C::chr00_13	YJR019C	TES1	0.545349	0.634897	0.113013	0.110957	no	no	no	no
YJR020W::chr00_13	YJR020W	YJR020W	-0.195976	0.341348	0.622145	0.260675	no	no	no	no
YJR022W::chr00_17b	YJR022W	LSM8	0.0350784	0.618564	0.435186	0.117185	no	no	no	no
YJR024C::chr00_13	YJR024C	MDE1	0.347669	0.431922	0.210448	0.206028	no	no	no	no
YJR025C::chr00_13	YJR025C	BNA1	-0.0862279	0.80538	0.534199	0.0595678	no	no	no	no
YJR030C::chr00_13	YJR030C	YJR030C	-0.111763	-0.220155	0.554977	0.680297	no	no	no	no
YJR032W::chr00_13	YJR032W	CPR7	-0.470217	0.0652471	0.808961	0.461935	no	no	no	no
YJR033C::chr00_13	YJR033C	RAV1	-1.04137	-0.149766	0.979648	0.629076	no	no	no	no
YJR034W::chr00_13	YJR034W	PET191	-0.802435	1.29081	0.940151	0.00590377	no	no	no	no
YJR037W::chr00_13	YJR037W	YJR037W	0.125276	0.502311	0.363791	0.168678	no	no	no	no
YJR038C::chr00_13	YJR038C	YJR038C	-0.170657	0.557452	0.602238	0.142672	no	no	no	no
YJR039W::chr00_13	YJR039W	YJR039W	-0.237294	0.123799	0.653923	0.416332	no	no	no	no
YJR040W::chr00_13	YJR040W	GEF1	-0.459686	0.502311	0.80302	0.168678	no	no	no	no
YJR041C::chr00_13	YJR041C	URB2	-0.0596745	0.597468	0.512493	0.125592	no	no	no	no
YJR043C::chr00_13	YJR043C	POL32	-0.204872	-0.0502302	0.629066	0.552776	no	no	no	no
YJR049C::chr00_13	YJR049C	UTR1	0.0257405	0.239276	0.442743	0.330141	no	no	no	no
YJR050W::chr00_13	YJR050W	ISY1	-0.0628534	-0.0137043	0.515095	0.524116	no	no	no	no
YJR054W::chr00_13	YJR054W	YJR054W	-0.111763	0.905376	0.554977	0.0395399	no	no	no	no
YJR055W::chr00_17b	YJR055W	HIT1	-0.0503625	-0.0946243	0.504869	0.587229	no	no	no	no
YJR057W::chr00_13	YJR057W	CDC8	-0.29939	-0.372158	0.699654	0.779042	no	no	no	no
YJR058C::chr00_13	YJR058C	APS2	0.920658	0.94977	0.0237906	0.0326065	no	no	no	no
YJR059W::chr00_13	YJR059W	PTK2	-0.154832	-0.423689	0.589655	0.808071	no	no	no	no
YJR060W::chr00_13	YJR060W	CBF1	0.303274	-0.0137043	0.237696	0.524116	no	no	no	no
YJR061W::chr00_13	YJR061W	YJR061W	0.674833	-0.0185213	0.0699096	0.527906	no	no	no	no
YJR062C::chr00_13	YJR062C	NTA1	0.103966	0.0428793	0.380337	0.479523	no	no	no	no
YJR063W::chr00_13	YJR063W	RPA12	0.120898	1.33443	0.367171	0.00460617	no	no	no	no
YJR065C::chr00_13	YJR065C	ARP3	0.473199	-0.220155	0.143992	0.680297	no	no	no	no
YJR067C::chr00_12	YJR067C	YAE1	0.110629	0.101773	0.375138	0.433389	no	no	no	no
YJR069C::chr00_12	YJR069C	HAM1	-0.143472	-0.120619	0.580565	0.607113	no	no	no	no
YJR073C::chr10_4	YJR073C	OPI3	-0.0761391	0.330042	0.52596	0.267985	no	no	no	no
YJR076C::chr10_4	YJR076C	CDC11	0.736234	0.779845	0.0545219	0.0657846	no	no	no	no
YJR077C::chr00_12	YJR077C	MIR1	0.707665	0.879381	0.0613111	0.0441278	no	no	no	no
YJR082C::chr10_4	YJR082C	EAF6	0.250807	0.464343	0.272247	0.188251	no	no	no	no
YJR084W::chr00_12	YJR084W	YJR084W	-0.4654	-0.109124	0.806257	0.598351	no	no	no	no
YJR091C::chr00_12	YJR091C	JSN1	0.473199	-0.0251392	0.143992	0.533109	no	no	no	no
YJR093C::chr00_12	YJR093C	FIP1	-0.374797	-0.220155	0.751177	0.680297	no	no	no	no
YJR094C::chr00_12	YJR094C	IME1	-0.386623	0.534732	0.758808	0.15304	no	no	no	no
YJR094W-A::chr00_12	YJR094W-A	RPL43B	0.347669	-0.590799	0.210448	0.885143	no	no	no	no
YJR095W::chr00_12	YJR095W	SFC1	0.058162	0.0237704	0.416611	0.494582	no	no	no	no
YJR097W::chr00_12	YJR097W	JJJ3	-0.270962	-0.0681521	0.679051	0.566748	no	no	no	no
YJR099W::chr00_12	YJR099W	YUH1	-0.567443	0.101773	0.858512	0.433389	no	no	no	no
YJR103W::chr10_4	YJR103W	URA8	0.435725	-0.341461	0.162158	0.760617	no	no	no	no
YJR105W::chr10_4	YJR105W	ADO1	0.400443	-0.449637	0.180568	0.821761	no	no	no	no
YJR106W::chr00_12	YJR106W	ECM27	0.370106	0.94977	0.197405	0.0326065	no	no	no	no
YJR107W::chr00_12	YJR107W	YJR107W	-0.0320358	0.997076	0.489862	0.0263548	no	no	no	no
YJR109C::chr00_12	YJR109C	CPA2	0.500167	0.0753007	0.131802	0.454052	no	no	no	no
YJR110W::chr10_4	YJR110W	YMR1	0.166018	0.0775254	0.332879	0.45231	no	no	no	no
YJR115W::chr10_4	YJR115W	YJR115W	-0.321981	0.992839	0.715586	0.0268705	no	no	no	no
YJR118C::chr00_12	YJR118C	ILM1	-0.252626	0.257892	0.665459	0.316924	no	no	no	no
YJR119C::chr00_12	YJR119C	JHD2	-0.00596835	0.502311	0.468546	0.168678	no	no	no	no
YJR120W::chr00_12	YJR120W	YJR120W	-0.187314	-0.00292444	0.615368	0.515627	no	no	no	no
YJR121W::chr00_12	YJR121W	ATP2	-0.170657	0.627842	0.602238	0.113617	no	no	no	no
YJR126C::chr00_12	YJR126C	VPS70	0.5472	0.101773	0.112286	0.433389	no	no	no	no
YJR129C::chr10_4	YJR129C	YJR129C	0.895891	0.94977	0.0267881	0.0326065	no	no	no	no
YJR131W::chr00_12	YJR131W	MNS1	-0.386623	-0.202233	0.758808	0.667532	no	no	no	no
YJR133W::chr00_12	YJR133W	XPT1	0.324336	0.133482	0.224534	0.408881	no	no	no	no
YJR137C::chr10_4	YJR137C	MET5	0.53332	0.335661	0.117817	0.264339	no	no	no	no
YJR144W::chr00_12	YJR144W	MGM101	0.828294	0.824239	0.0366076	0.0552794	no	no	no	no
YJR146W::chr10_4	YJR146W	YJR146W	-0.151291	0.305914	0.586827	0.283922	no	no	no	no
YJR147W::chr10_4	YJR147W	HMS2	0.210165	-0.220155	0.300626	0.680297	no	no	no	no
YJR148W::chr00_12	YJR148W	BAT2	0.250807	0.0237704	0.272247	0.494582	no	no	no	no
YJR152W::chr10_4	YJR152W	DAL5	-0.526801	-0.519715	0.838969	0.855565	no	no	no	no
YJR154W::chr10_4	YJR154W	YJR154W	0.283538	-0.896239	0.250404	0.964446	no	no	no	no
YKL001C::chr11_1	YKL001C	MET14	0.849348	0.437564	0.0332747	0.202865	no	no	no	no
YKL002W::chr11_1	YKL002W	DID4	0.610703	-0.211385	0.0893419	0.674076	no	no	no	no
YKL003C::chr11_1	YKL003C	MRP17	0.339933	0.618564	0.21506	0.117185	no	no	no	no
YKL005C::chr00_12	YKL005C	BYE1	0.0137679	-0.442548	0.452463	0.818083	no	no	no	no
YKL006W::chr11_1	YKL006W	RPL14A	0.189407	0.18793	0.315618	0.367667	no	no	no	no
YKL007W::chr11_1	YKL007W	CAP1	-0.767809	-1.98312	0.931224	0.999961	no	no	no	no
YKL008C::chr11_1	YKL008C	LAC1	0.845168	1.01688	0.0339157	0.0240523	no	no	no	no
YKL010C::chr11_1	YKL010C	UFD4	-0.143472	0.101773	0.580565	0.433389	no	no	no	no
YKL013C::chr11_1	YKL013C	ARC19	0.660826	-0.184531	0.0738489	0.65473	no	no	no	no
YKL014C::chr11_1	YKL014C	URB1	-0.0476327	0.566441	0.502634	0.138705	no	no	no	no
YKL022C::chr11_1	YKL022C	CDC16	0.225272	0.0428793	0.289922	0.479523	no	no	no	no
YKL026C::chr11_1	YKL026C	GPX1	0.473199	0.123799	0.143992	0.416332	no	no	no	no
YKL027W::chr11_1	YKL027W	YKL027W	-0.696726	1.08654	0.909722	0.0172524	no	yes	no	yes
YKL029C::chr11_1	YKL029C	MAE1	-0.16423	-0.0502302	0.59714	0.552776	no	no	no	no
YKL030W::chr00_12	YKL030W	YKL030W	0.373664	0.850234	0.195383	0.0497723	no	no	no	no
YKL032C::chr11_1	YKL032C	IXR1	-0.456411	-0.886731	0.80115	0.96295	no	no	no	no
YKL033W::chr11_1	YKL033W	TTI1	0.238734	1.64492	0.280537	0.000646045	no	no	no	yes
YKL034W::chr11_1	YKL034W	TUL1	-0.0122273	0.308224	0.473658	0.282377	no	no	no	no
YKL035W::chr11_1	YKL035W	UGP1	0.525667	0.364807	0.120949	0.245842	no	no	no	no
YKL036C::chr11_1	YKL036C	YKL036C	-0.588201	-0.571062	0.867847	0.8774	no	no	no	no
YKL038W::chr11_1	YKL038W	RGT1	-0.0831939	-0.302617	0.531723	0.736148	no	no	no	no
YKL039W::chr11_1	YKL039W	PTM1	-0.4528	0.101773	0.799075	0.433389	no	no	no	no
YKL041W::chr11_1	YKL041W	VPS24	-1.04137	-1.63519	0.979648	0.999453	no	no	no	no
YKL042W::chr11_1	YKL042W	SPC42	-0.439338	-0.54773	0.791227	0.867783	no	no	no	no
YKL045W::chr11_1	YKL045W	PRI2	0.245789	-0.135622	0.275678	0.618465	no	no	no	no
YKL049C::chr11_1	YKL049C	CSE4	0.867478	0.244513	0.0306086	0.326401	no	no	no	no
YKL050C::chr11_1	YKL050C	YKL050C	-0.66882	-0.0991398	0.900037	0.5907	no	no	no	no
YKL051W::chr11_1	YKL051W	SFK1	-0.0540475	-0.677013	0.507886	0.91489	no	no	no	no
YKL052C::chr11_1	YKL052C	ASK1	-0.0503625	-0.0275101	0.504869	0.534971	no	no	no	no
YKL053C-A::chr00_17b	YKL053C-A	MDM35	-0.0573152	0.671505	0.510562	0.0978651	no	yes	no	yes
YKL053W::chr11_1	YKL053W	YKL053W	-0.292335	0.294418	0.694597	0.291671	no	no	no	no
YKL057C::chr11_1	YKL057C	NUP120	0.795128	-0.239264	0.0424079	0.693677	no	no	no	no
YKL058W::chr11_1	YKL058W	TOA2	-0.935272	-0.721736	0.96628	0.92784	no	no	no	no
YKL059C::chr11_1	YKL059C	MPE1	0.210165	0.227304	0.300626	0.338756	no	no	no	no
YKL062W::chr11_1	YKL062W	MSN4	0.736234	1.2128	0.0545219	0.00904734	no	no	no	no
YKL063C::chr11_1	YKL063C	YKL063C	-0.315296	0.364807	0.710914	0.245842	no	no	no	no
YKL064W::chr11_1	YKL064W	MNR2	0.768655	1.31234	0.0475527	0.00522752	no	no	no	no
YKL065C::chr11_1	YKL065C	YET1	-1.01223	-0.0502302	0.976522	0.552776	no	no	no	no
YKL066W::chr11_1	YKL066W	YKL066W	0.0946879	1.68674	0.387611	0.000482757	no	no	no	yes
YKL067W::chr11_1	YKL067W	YNK1	-0.185764	1.02777	0.614151	0.0228603	no	no	no	no
YKL068W::chr11_1	YKL068W	NUP100	0.280554	-0.0502302	0.252356	0.552776	no	no	no	no
YKL070W::chr11_1	YKL070W	YKL070W	0.058162	-0.509662	0.416611	0.851	no	no	no	no
YKL074C::chr11_1	YKL074C	MUD2	-1.05036	-0.805118	0.980538	0.947886	no	no	no	no
YKL075C::chr11_1	YKL075C	YKL075C	1.40847	-0.0502302	0.0014297	0.552776	yes	no	yes	no
YKL076C::chr11_1	YKL076C	PSY1	0.860223	-0.355085	0.0316536	0.768896	no	no	no	no
YKL077W::chr11_1	YKL077W	YKL077W	-0.0793415	-0.0502302	0.528577	0.552776	no	no	no	no
YKL078W::chr11_1	YKL078W	DHR2	0.653772	-0.54773	0.0758962	0.867783	no	no	no	no
YKL079W::chr11_1	YKL079W	SMY1	0.303274	0.194882	0.237696	0.362502	no	no	no	no
YKL081W::chr11_1	YKL081W	TEF4	-0.526801	-0.149766	0.838969	0.629076	no	no	no	no
YKL083W::chr11_1	YKL083W	YKL083W	0.803348	0.654314	0.0409052	0.103865	no	no	no	no
YKL085W::chr11_1	YKL085W	MDH1	0.987773	0.51681	0.0170511	0.161561	no	no	no	no
YKL086W::chr11_1	YKL086W	SRX1	0.714208	0.480285	0.0597007	0.179868	no	no	no	no
YKL088W::chr11_1	YKL088W	CAB3	-0.130872	-0.691776	0.570432	0.919345	no	no	no	no
YKL089W::chr11_1	YKL089W	MIF2	0.151271	-0.39008	0.34395	0.789412	no	no	no	no
YKL090W::chr11_1	YKL090W	CUE2	0.584231	0.94977	0.0984426	0.0326065	no	no	no	no
YKL091C::chr11_1	YKL091C	YKL091C	-0.39674	1.41543	0.765235	0.00285342	no	no	no	no
YKL095W::chr11_1	YKL095W	YJU2	0.280554	0.94977	0.252356	0.0326065	no	no	no	no
YKL096W::chr11_2	YKL096W	CWP1	-0.22724	-1.15875	0.64628	0.989928	no	no	no	no
YKL097C::chr11_2	YKL097C	YKL097C	0.103966	-0.00442646	0.380337	0.51681	no	no	no	no
YKL099C::chr11_2	YKL099C	UTP11	0.0861764	-0.136387	0.394319	0.619042	no	no	no	no
YKL102C::chr11_2	YKL102C	YKL102C	-0.214857	-0.787196	0.636784	0.944	no	no	no	no
YKL104C::chr11_2	YKL104C	GFA1	1.05816	-0.0502302	0.0118069	0.552776	no	no	no	no
YKL105C::chr11_2	YKL105C	YKL105C	0.325101	1.11483	0.224064	0.0150023	no	no	no	no
YKL108W::chr11_2	YKL108W	SLD2	0.151271	-0.635193	0.34395	0.901273	no	no	no	no
YKL109W::chr11_2	YKL109W	HAP4	-0.243008	-0.287269	0.65824	0.72614	no	no	no	no
YKL110C::chr11_2	YKL110C	KTI12	0.762706	0.321739	0.0487751	0.273418	no	no	no	no
YKL111C::chr11_2	YKL111C	YKL111C	1.23219	0.239276	0.00438877	0.330141	no	no	no	no
YKL112W::chr11_2	YKL112W	ABF1	0.814236	0.153303	0.0389816	0.393734	no	no	no	no
YKL113C::chr11_2	YKL113C	RAD27	0.584231	0.94977	0.0984426	0.0326065	no	no	no	no
YKL114C::chr11_2	YKL114C	APN1	0.134398	0.54538	0.356784	0.148121	no	no	no	no
YKL118W::chr11_2	YKL118W	YKL118W	-0.304408	-0.149766	0.703227	0.629076	no	no	no	no
YKL119C::chr11_2	YKL119C	VPH2	-0.496427	-0.635193	0.823265	0.901273	no	no	no	no
YKL120W::chr11_2	YKL120W	OAC1	-0.111763	-0.805118	0.554977	0.947886	no	no	no	no
YKL127W::chr11_2	YKL127W	PGM1	0.351209	0.54538	0.208357	0.148121	no	no	no	no
YKL133C::chr11_2	YKL133C	YKL133C	-0.444338	-0.165707	0.794163	0.640919	no	no	no	no
YKL134C::chr11_2	YKL134C	OCT1	0.261695	-0.387265	0.264877	0.787802	no	no	no	no
YKL135C::chr11_2	YKL135C	APL2	-0.111763	0.654314	0.554977	0.103865	no	no	no	no
YKL138C::chr11_2	YKL138C	MRPL31	-0.0468076	0.33784	0.501958	0.262932	no	no	no	no
YKL139W::chr11_2	YKL139W	CTK1	-0.664304	-0.772696	0.898401	0.940692	no	no	no	no
YKL140W::chr11_2	YKL140W	TGL1	-0.749193	-1.46527	0.926017	0.998302	no	no	no	no
YKL142W::chr11_2	YKL142W	MRP8	-0.424921	0.123799	0.782626	0.416332	no	no	no	no
YKL143W::chr11_2	YKL143W	LTV1	0.071101	-0.287269	0.406277	0.72614	no	no	no	no
YKL144C::chr11_2	YKL144C	RPC25	0.125276	0.016884	0.363791	0.500012	no	no	no	no
YKL148C::chr11_2	YKL148C	SDH1	-0.0769976	0.172162	0.526662	0.37947	no	no	no	no
YKL153W::chr11_2	YKL153W	YKL153W	0.434725	-0.534264	0.162662	0.862002	no	no	no	no
YKL154W::chr11_2	YKL154W	SRP102	-0.696726	0.0846994	0.909722	0.446699	no	no	no	no
YKL155C::chr11_2	YKL155C	RSM22	-0.087101	0.492563	0.534911	0.173574	no	no	no	no
YKL156W::chr11_2	YKL156W	RPS27A	-0.0215652	0.431922	0.481293	0.206028	no	no	no	no
YKL157W::chr11_2	YKL157W	APE2	-1.71945	-2.63519	0.999707	1	no	no	no	no
YKL158W::chr11_2	YKL157W	APE2	0.071101	0.712731	0.406277	0.0845203	no	no	no	no
YKL160W::chr11_2	YKL160W	ELF1	0.913772	-0.0877049	0.0245943	0.581896	no	no	no	no
YKL161C::chr11_2	YKL161C	KDX1	-0.315296	-0.175761	0.710914	0.648319	no	no	no	no
YKL162C-A::chr00_3	YKL162C-A	YKL162C-A	-0.363302	0.00223727	0.743638	0.511559	no	no	no	no
YKL162C::chr11_2	YKL162C	YKL162C	-0.566329	-0.465268	0.857999	0.829702	no	no	no	no
YKL164C::chr11_2	YKL164C	PIR1	-0.820532	0.231541	0.944442	0.335698	no	no	no	no
YKL169C::chr11_2	YKL169C	YKL169C	0.245789	-0.135622	0.275678	0.618465	no	no	no	no
YKL174C::chr11_2	YKL174C	TPO5	0.707665	0.51681	0.0613111	0.161561	no	no	no	no
YKL175W::chr11_2	YKL175W	ZRT3	-0.111763	0.101773	0.554977	0.433389	no	no	no	no
YKL177W::chr11_2	YKL177W	YKL177W	0.51502	0.324165	0.125401	0.271825	no	no	no	no
YKL178C::chr11_2	YKL178C	STE3	0.183693	-0.465268	0.319799	0.829702	no	no	no	no
YKL180W::chr11_2	YKL180W	RPL17A	0.38009	-0.251864	0.191762	0.702361	no	no	no	no
YKL181W::chr11_2	YKL181W	PRS1	0.058162	-0.298158	0.416611	0.733259	no	no	no	no
YKL182W::chr11_2	YKL182W	FAS1	-0.111763	-0.0275101	0.554977	0.534971	no	no	no	no
YKL183W::chr11_2	YKL183W	LOT5	0.121727	0.522349	0.36653	0.158895	no	no	no	no
YKL184W::chr11_2	YKL184W	SPE1	1.67151	0.364807	0.000213817	0.245842	yes	no	yes	no
YKL187C::chr11_2	YKL187C	YKL187C	-0.151291	-0.573792	0.586827	0.878493	no	no	no	no
YKL188C::chr11_2	YKL188C	PXA2	-0.0628534	-0.561192	0.515095	0.873394	no	no	no	no
[truncated: 3,190 more rows]

## Sheet: flight-ground 14G
Strain	ORF	Gene	Log2ratio	P	DropsOut	Significant
YLR395C::chr12_5	YLR395C	COX8	3.71103	6.33e-15	yes	yes
YOR355W::chr15_4	YOR355W	GDS1	1.86552	4.41e-05	no	yes
YEL034W::chr00_8	YEL034W	HYP2	1.83998	5.48e-05	no	yes
YOR173W::chr15_2	YOR173W	DCS2	1.83577	5.68e-05	no	yes
YGR236C::chr00_2	YGR236C	SPG1	1.79513	7.96e-05	no	yes
YKL184W::chr11_2	YKL184W	SPE1	1.67151	0.000213817	yes	yes
YMR107W::chr00_9	YMR107W	SPG4	1.49009	0.000816313	no	yes
YNL149C::chr14_2	YNL149C	PGA2	1.4853	0.000844218	no	yes
YJL119C::chr10_2	YJL119C	YJL119C	1.4732	0.000918676	no	yes
YCL053C::chr3_1	deleted	YCL053C	1.40847	0.00142969	yes	yes
YKL075C::chr11_1	YKL075C	YKL075C	1.40847	0.00142969	yes	yes
YBR267W::chr2_4	YBR267W	REI1	1.29552	0.00297438	yes	yes
YPR021C::chr00_18	YPR021C	AGC1	1.05777	0.0118316	yes	yes
YLR340W::chr12_5	YLR340W	RPP0	0.961012	0.0195123	yes	yes
YKL167C::chr11_2	YKL167C	MRP49	0.828655	0.0365483	yes	yes
YOR287C::chr15_3	YOR287C	RRP36	0.778118	0.0456591	yes	yes
YGR076C::chr7_4	YGR076C	MRPL25	0.640614	0.0798295	yes	yes
YER117W::chr00_5	YER117W	RPL23B	0.463244	0.148679	yes	yes
YDR326C::chr00_17a	YDR326C	YSP2	0.384353	0.189383	yes	yes
YPR038W::chr16_4	YPR038W	IRC16	0.363937	0.200942	yes	yes
YHR123W::chr8_2	YHR123W	EPT1	0.223689	0.291035	yes	yes
YLR120C::chr12_2	YLR120C	YPS1	0.113866	0.372621	yes	yes
YDR070C::chr4_4	YDR070C	FMP16	0.0974717	0.385424	yes	yes

## Sheet: flight-ground 21G
Strain	ORF	Gene	Log2ratio	P	DropsOut	Significant
YJL044C::chr10_2	YJL044C	GYP6	2.30894	2.95e-06	yes	yes
YEL067C::chr5_2	YEL067C	YEL067C	1.96101	6.09e-05	yes	yes
YPL165C::chr16_2	YPL165C	SET6	1.75712	0.000291384	no	yes
YIR003W::chr9_2	YIR003W	AIM21	1.68674	0.000482757	no	yes
YDR486C::chr4_8	YDR486C	VPS60	1.67151	0.000537195	yes	yes
YNL149C::chr14_2	YNL149C	PGA2	1.65791	0.000590528	no	yes
YKL033W::chr11_1	YKL033W	TTI1	1.64492	0.000646045	no	yes
YJL051W::chr10_2	YJL051W	IRC8	1.40847	0.00297608	yes	yes
YMR106C::chr00_9	YMR106C	YKU80	1.40847	0.00297608	yes	yes
YKL054C::chr11_1	YKL054C	DEF1	1.34323	0.00437778	yes	yes
YNL008C::chr14_4	YNL008C	ASI3	1.30894	0.00532963	yes	yes
YOL053C-A::chr15_5	YOL052C-A	DDR2	1.30894	0.00532963	yes	yes
YOL118C::chr00_6	YOL118C	YOL118C	1.30894	0.00532963	yes	yes
YPL144W::chr16_2	YPL144W	POC4	1.30894	0.00532963	yes	yes
YIR031C::chr00_3	YIR031C	DAL7	1.20202	0.00958109	yes	yes
YKL027W::chr11_1	YKL027W	YKL027W	1.08654	0.0172524	yes	yes
YER146W::chr00_5	YER146W	LSM5	0.961012	0.0310197	yes	yes
YHR010W::chr8_1	YHR010W	RPL27A	0.961012	0.0310197	yes	yes
YLR250W::chr12_4	YLR250W	SSP120	0.961012	0.0310197	yes	yes
YPL268W::chr00_15	YPL268W	PLC1	0.961012	0.0310197	yes	yes
YOR235W::chr15_3	YOR235W	IRC13	0.913047	0.0382626	yes	yes
YOL028C::chr15_5	YOL028C	YAP7	0.823509	0.0554409	yes	yes
YNL216W::chr14_2	YNL216W	RAP1	0.780687	0.0655719	yes	yes
YOR287C::chr15_3	YOR287C	RRP36	0.778118	0.0662227	yes	yes
YPR043W::chr00_15	YPR043W	RPL43A	0.749548	0.0737998	yes	yes
YEL028W::chr5_2	YEL028W	YEL028W	0.671505	0.0978651	yes	yes
YHR038W::chr8_1	YHR038W	RRF1	0.671505	0.0978651	yes	yes
YLR417W::chr12_5	YLR417W	VPS36	0.671505	0.0978651	yes	yes
YKL115C::chr00_14	YKL115C	YKL115C	0.665851	0.0998096	yes	yes
YOR243C::chr15_3	YOR243C	PUS7	0.553151	0.144598	yes	yes
YPL163C::chr16_2	YPL163C	SVS1	0.528904	0.155778	yes	yes
YBR219C::chr2_4	YBR219C	YBR219C	0.50158	0.169041	yes	yes
YER142C::chr00_5	YER142C	MAG1	0.50158	0.169041	yes	yes
YPL107W::chr16_2	YPL107W	YPL107W	0.50158	0.169041	yes	yes
YLR246W::chr00_11	YLR246W	ERF2	0.450392	0.195781	yes	yes
YMR229C::chr13_4	YMR229C	RRP5	0.437423	0.202943	yes	yes
YPR196W::chr16_5	YPR196W	YPR196W	0.424338	0.210326	yes	yes
YDR326C::chr00_17a	YDR326C	YSP2	0.384353	0.233839	yes	yes
YNL254C::chr14_1	YNL254C	RTC4	0.36736	0.244256	yes	yes
YPR038W::chr16_4	YPR038W	IRC16	0.363937	0.246384	yes	yes
YJR117W::chr00_12	YJR117W	STE24	0.357067	0.250686	yes	yes
YLL023C::chr12_1	YLL023C	POM33	0.336259	0.263953	yes	yes
YPL254W::chr16_1	YPL254W	HFI1	0.336259	0.263953	yes	yes
YCL029C::chr3_1	YCL029C	BIK1	0.308935	0.281901	yes	yes
YEL063C::chr5_2	YEL063C	CAN1	0.308935	0.281901	yes	yes
YGL006W::chr7_1	YGL006W	PMC1	0.308935	0.281901	yes	yes
YGR119C::chr7_4	YGR119C	NUP57	0.308935	0.281901	yes	yes
YLR347C::chr12_5	YLR347C	KAP95	0.308935	0.281901	yes	yes
YMR131C::chr00_9	YMR131C	RRB1	0.308935	0.281901	yes	yes
YNL169C::chr14_2	YNL169C	PSD1	0.308935	0.281901	yes	yes
YNL205C::chr14_2	YNL205C	YNL205C	0.308935	0.281901	yes	yes
YPL162C::chr16_2	YPL162C	YPL162C	0.308935	0.281901	yes	yes
YMR243C::chr13_5	YMR243C	ZRC1	0.282885	0.299543	yes	yes
YDR083W::chr4_4	YDR083W	RRP8	0.246173	0.325219	yes	yes
YCR092C::chr00_2	YCR092C	MSH3	0.223689	0.341374	yes	yes
YHR123W::chr8_2	YHR123W	EPT1	0.223689	0.341374	yes	yes
YDR158W::chr4_5	YDR158W	HOM2	0.204681	0.355264	yes	yes
YOL016C::chr00_8	YOL016C	CMK2	0.154055	0.393162	yes	yes
YPR029C::chr16_4	YPR029C	APL4	0.138114	0.405329	yes	yes
YLR120C::chr12_2	YLR120C	YPS1	0.113866	0.424007	yes	yes
YGR206W::chr7_5	YGR206W	MVB12	0.109785	0.427169	yes	yes
YGR118W::chr7_4	YGR118W	RPS23A	0.0892041	0.443181	yes	yes
YHR074W::chr8_2	YHR074W	QNS1	0.086543	0.445259	yes	yes
YIR009W::chr9_2	YIR009W	MSL1	0.086543	0.445259	yes	yes
YLR182W::chr12_3	YLR182W	SWI6	0.086543	0.445259	yes	yes
YLR105C::chr12_2	YLR105C	SEN2	0.038578	0.482911	yes	yes
YPL081W::chr16_3	YPL081W	RPS9A	0.0125828	0.503403	yes	yes

## Sheet: flight-ground processes 14G
GO process	Query set fraction	Process fraction	Fold enrichment	P	FDR	Overlap genes
CELLULAR BIOGENIC AMINE BIOSYNTHETIC PROCESS	0.0869565	0.2	23.3652	0.00302587	1	SPE1(1.67)|EPT1(0.22)
CELLULAR MODIFIED AMINO ACID BIOSYNTHETIC PROCESS	0.0869565	0.142857	16.6894	0.00599281	1	HYP2(1.84)|SPE1(1.67)
CELLULAR BIOGENIC AMINE METABOLIC PROCESS	0.0869565	0.111111	12.9807	0.00986839	1	SPE1(1.67)|EPT1(0.22)

## Sheet: flight-ground processes 21G
GO process	Query set fraction	Process fraction	Fold enrichment	P	FDR	Overlap genes
PHOSPHATIDYLCHOLINE BIOSYNTHETIC PROCESS	0.0447761	0.5	20.0522	0.000281031	0.307934	KAP95(0.31)|PSD1(0.31)|EPT1(0.22)
PHOSPHATIDYLCHOLINE METABOLIC PROCESS	0.0447761	0.428571	17.1876	0.000483034	0.307934	KAP95(0.31)|PSD1(0.31)|EPT1(0.22)
ETHANOLAMINE-CONTAINING COMPOUND METABOLIC PROCESS	0.0447761	0.375	15.0392	0.000759084	0.322611	KAP95(0.31)|PSD1(0.31)|EPT1(0.22)
NUCLEAR PORE ORGANIZATION	0.0447761	0.3	12.0313	0.00156924	0.500196	POM33(0.34)|NUP57(0.31)|KAP95(0.31)
NUCLEUS ORGANIZATION	0.0597015	0.173913	6.97469	0.00218801	0.557943	POM33(0.34)|BIK1(0.31)|NUP57(0.31)|KAP95(0.31)
PROTEIN LOCALIZATION TO CHROMOSOME	0.0447761	0.2	8.0209	0.0054409	1	YKU80(1.41)|PLC1(0.96)|RAP1(0.78)
DNA CATABOLIC PROCESS	0.0298507	0.333333	13.3682	0.00861286	1	MAG1(0.5)|MSH3(0.22)
CELLULAR BIOGENIC AMINE METABOLIC PROCESS	0.0447761	0.166667	6.68408	0.00924982	1	KAP95(0.31)|PSD1(0.31)|EPT1(0.22)
